# Supplementary material for: Electron transfer engineering of artificially designed cell factory for complete biosynthesis of natural products
Source: Research Square preprint supplement (doi:10.21203/rs.3.rs-4718218/v1), 2024-08-01

# 分析报告

数据文件名称 4608-02.d  
样品类型 Sample  
采集方法 Test-20040520-01.m

样品名称 4608-2  
仪器名称 Agilent 1290II-6460  
采集时间 5/20/2024 5:38:14 PM

User Chromatograms

裂解电压 100 碰撞能量 0 电离模式 ESI

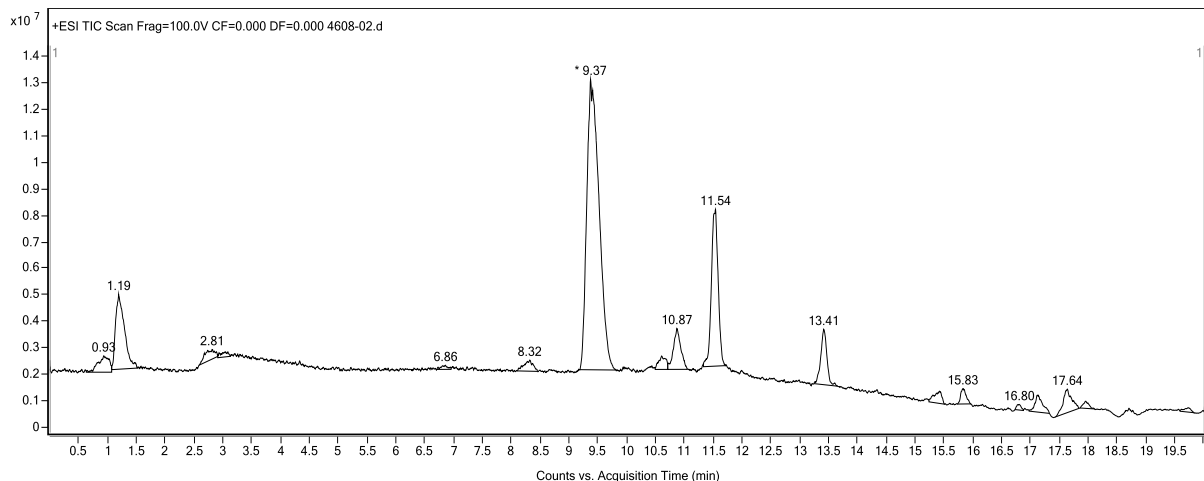

积分峰列表

| 峰  | 保留时间  | 峰高          | 面积          | 面积百分比, % | 总面积百分比, % |
|----|-------|-------------|-------------|----------|-----------|
| 1  | 0.93  | 616675.25   | 8087064.58  | 4.98     | 2.51      |
| 2  | 1.19  | 2824781.75  | 30320472.08 | 18.66    | 9.41      |
| 3  | 2.81  | 361399.01   | 4683456.72  | 2.88     | 1.45      |
| 4  | 3.09  | 179363.05   | 1750450.29  | 1.08     | 0.54      |
| 5  | 6.86  | 152240.97   | 1262927.38  | 0.78     | 0.39      |
| 6  | 8.32  | 415947.1    | 4502320.21  | 2.77     | 1.4       |
| 7  | 9.37  | 10958292.15 | 162475613.3 | 100      | 50.43     |
| 8  | 10.6  | 505436.69   | 4376190.49  | 2.69     | 1.36      |
| 9  | 10.87 | 1545525.25  | 13750981.8  | 8.46     | 4.27      |
| 10 | 11.54 | 5913896.09  | 48047361.53 | 29.57    | 14.91     |
| 11 | 13.41 | 2087919.67  | 15425691.94 | 9.49     | 4.79      |
| 12 | 15.42 | 460253.54   | 4297580.7   | 2.65     | 1.33      |
| 13 | 15.83 | 576773.93   | 3785027.51  | 2.33     | 1.17      |
| 14 | 16.8  | 210145.77   | 1141069.45  | 0.7      | 0.35      |
| 15 | 17.12 | 637191.21   | 5909886.27  | 3.64     | 1.83      |
| 16 | 17.64 | 886172.62   | 9178580.23  | 5.65     | 2.85      |
| 17 | 17.95 | 268337.81   | 1809954.72  | 1.11     | 0.56      |
| 18 | 19.73 | 162952.62   | 1362362.53  | 0.84     | 0.42      |

# 分析报告

质谱图 Peak (1) in "+ TIC Scan - 4608-02.d" 裂解电压 100 碰撞能量 0 电离模式 ESI

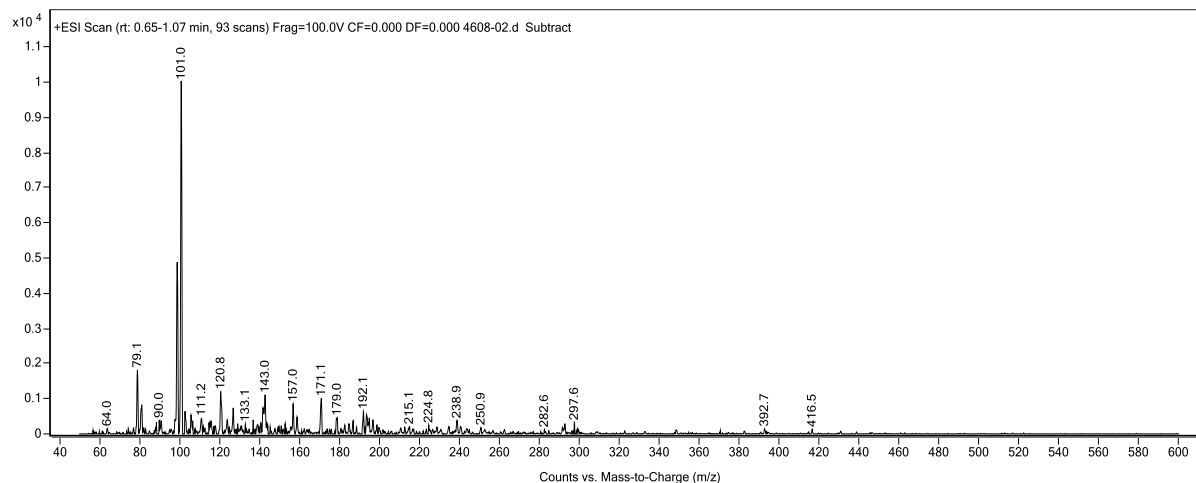

质谱图 Peak (2) in "+ TIC Scan - 4608-02.d" 裂解电压 100 碰撞能量 0 电离模式 ESI

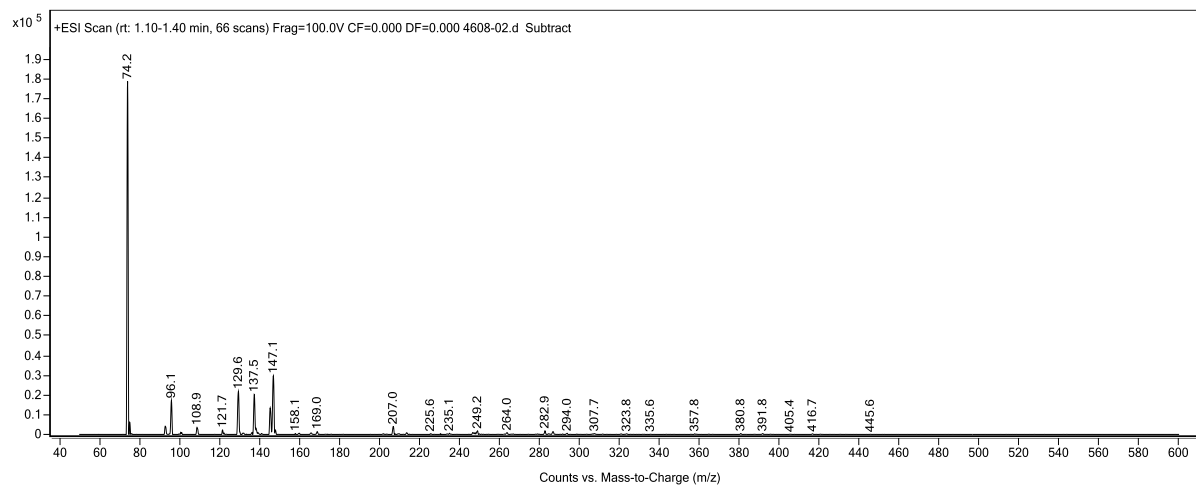

质谱图 Peak (3) in "+ TIC Scan - 4608-02.d" 裂解电压 100 碰撞能量 0 电离模式 ESI

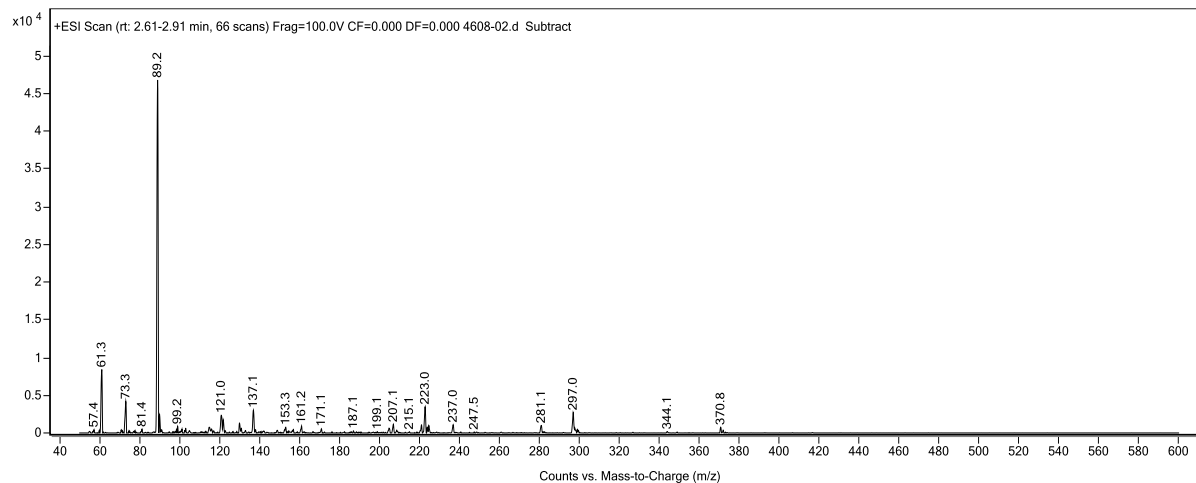

# 分析报告

质谱图 Peak (4) in "+ TIC Scan - 4608-02.d" 裂解电压 100 碰撞能量 0 电离模式 ESI

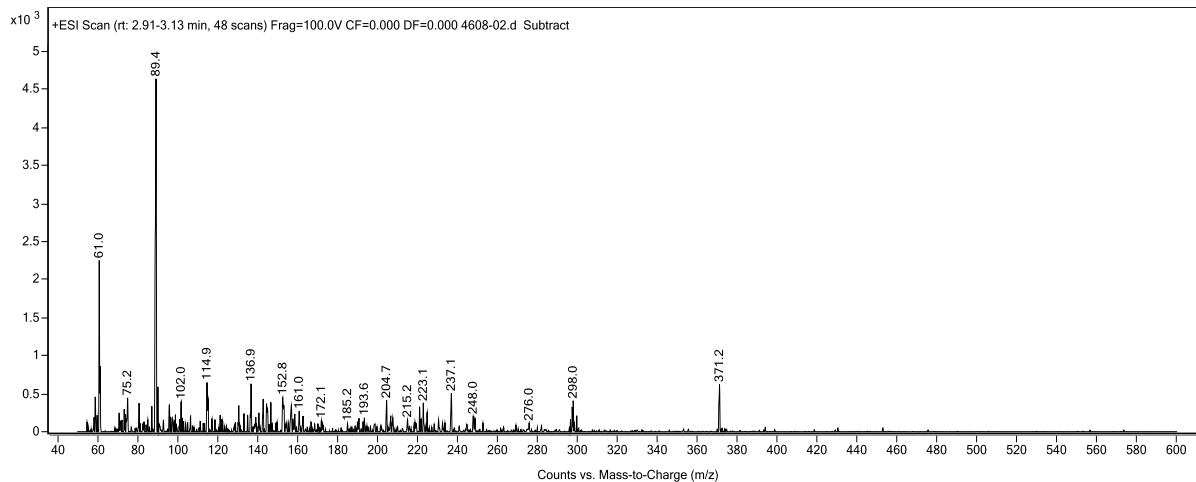

质谱图 Peak (5) in "+ TIC Scan - 4608-02.d" 裂解电压 100 碰撞能量 0 电离模式 ESI

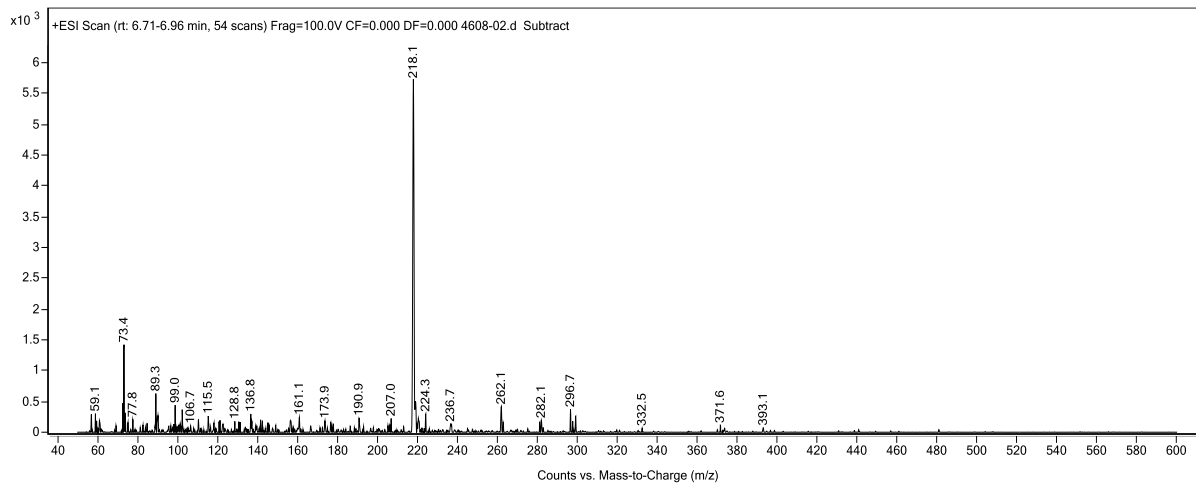

质谱图 Peak (6) in "+ TIC Scan - 4608-02.d" 裂解电压 100 碰撞能量 0 电离模式 ESI

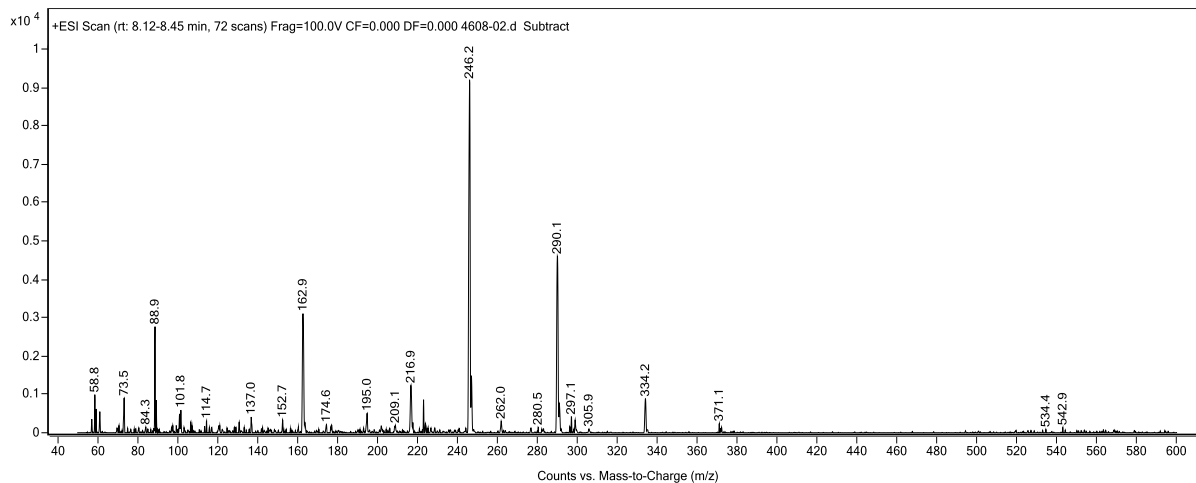

# 分析报告

质谱图 Peak (7) in "+ TIC Scan - 4608-02.d" 裂解电压 100 碰撞能量 0 电离模式 ESI

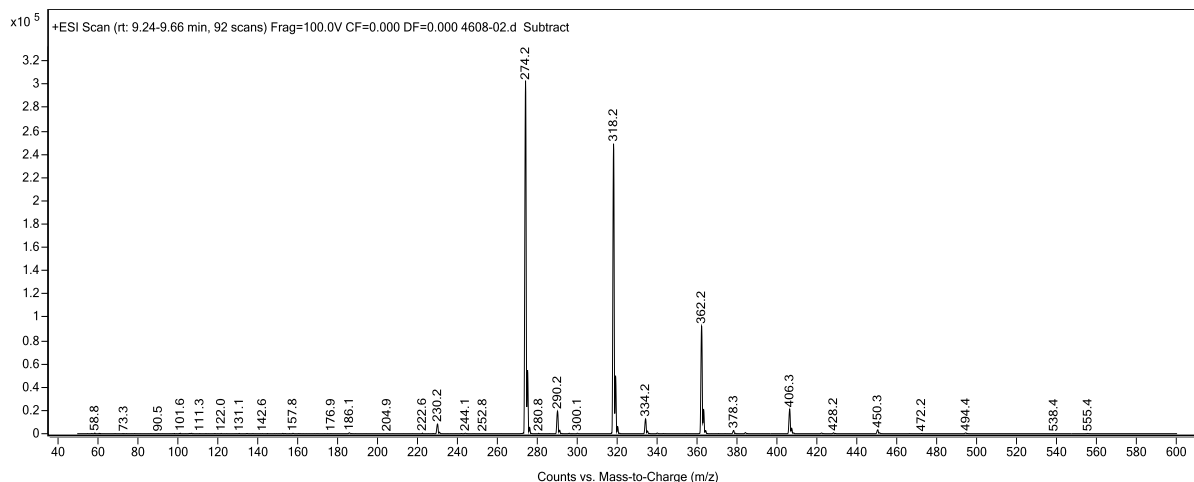

质谱图 Peak (8) in "+ TIC Scan - 4608-02.d" 裂解电压 100 碰撞能量 0 电离模式 ESI

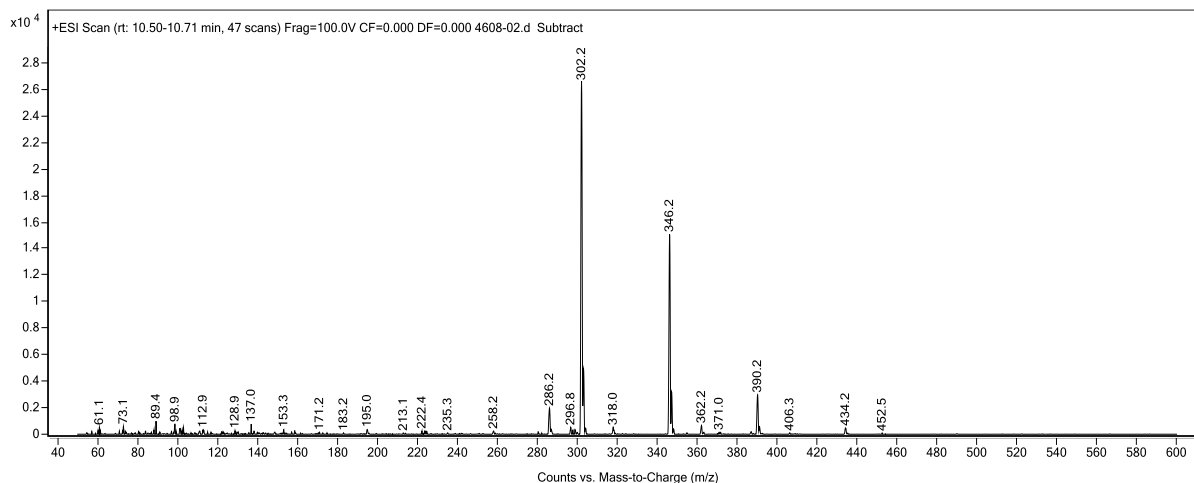

质谱图 Peak (9) in "+ TIC Scan - 4608-02.d" 裂解电压 100 碰撞能量 0 电离模式 ESI

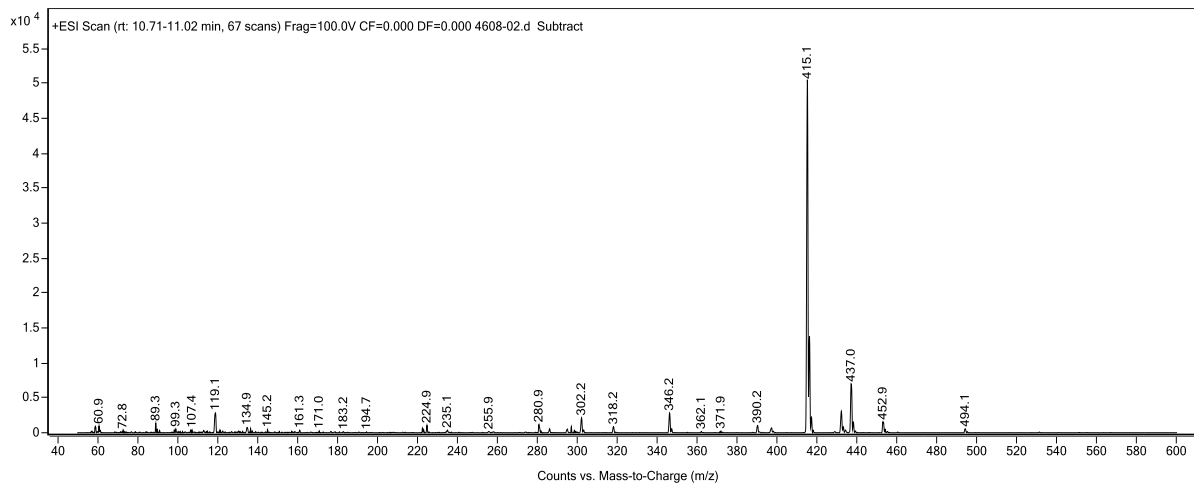

# 分析报告

质谱图 Peak (10) in "+" TIC Scan - 4608-02.d" 裂解电压 100 碰撞能量 0 电离模式 ESI

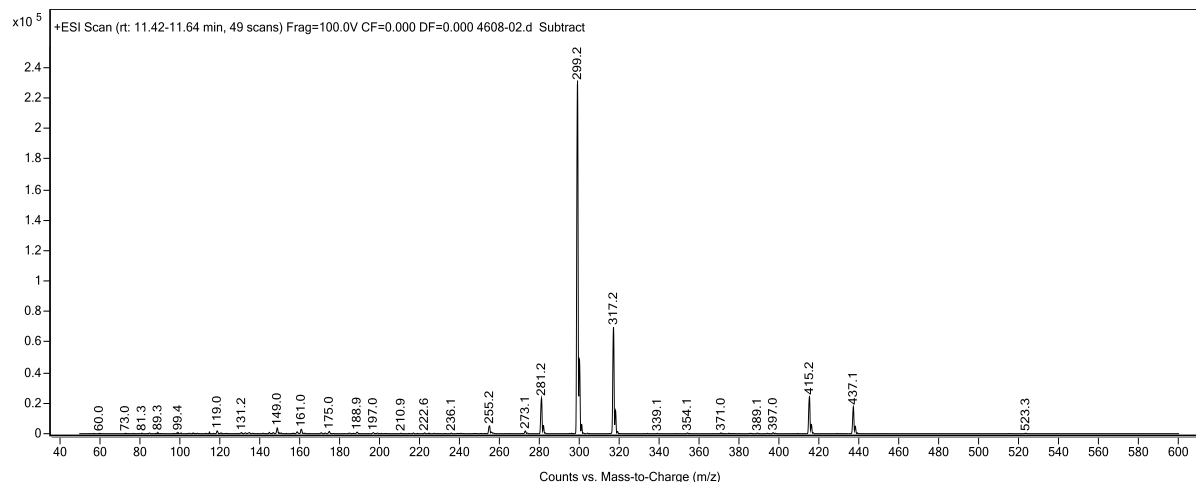

质谱图 Peak (11) in "+" TIC Scan - 4608-02.d" 裂解电压 100 碰撞能量 0 电离模式 ESI

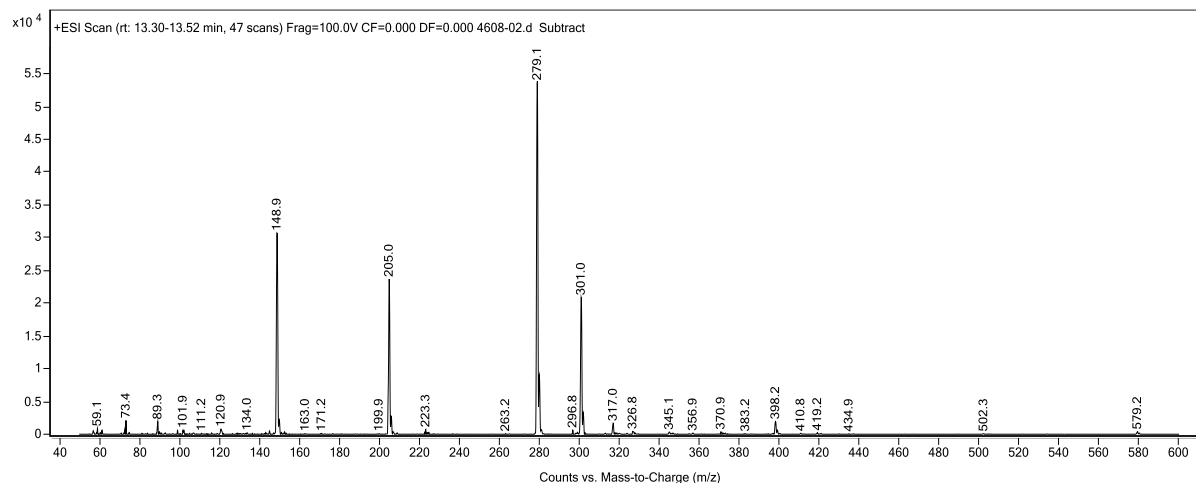

质谱图 Peak (12) in "+" TIC Scan - 4608-02.d" 裂解电压 100 碰撞能量 0 电离模式 ESI

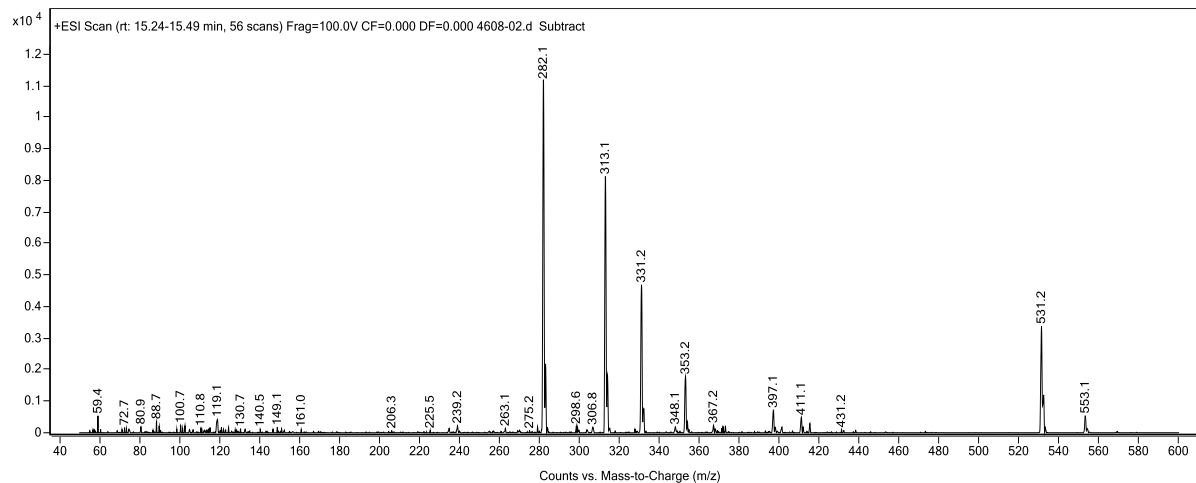

# 分析报告

质谱图 Peak (13) in "+" TIC Scan - 4608-02.d" 裂解电压 100 碰撞能量 0 电离模式 ESI

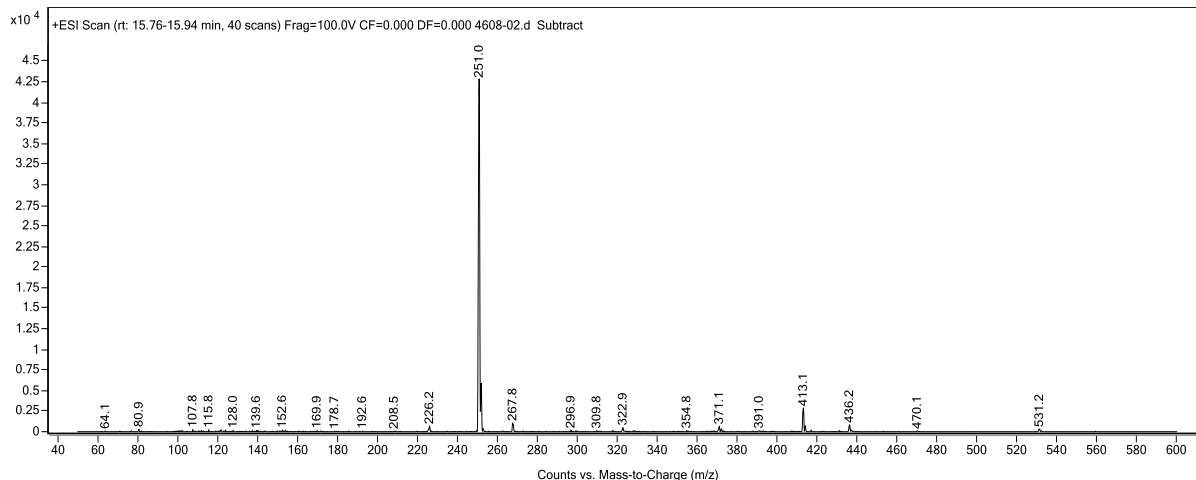

质谱图 Peak (14) in "+" TIC Scan - 4608-02.d" 裂解电压 100 碰撞能量 0 电离模式 ESI

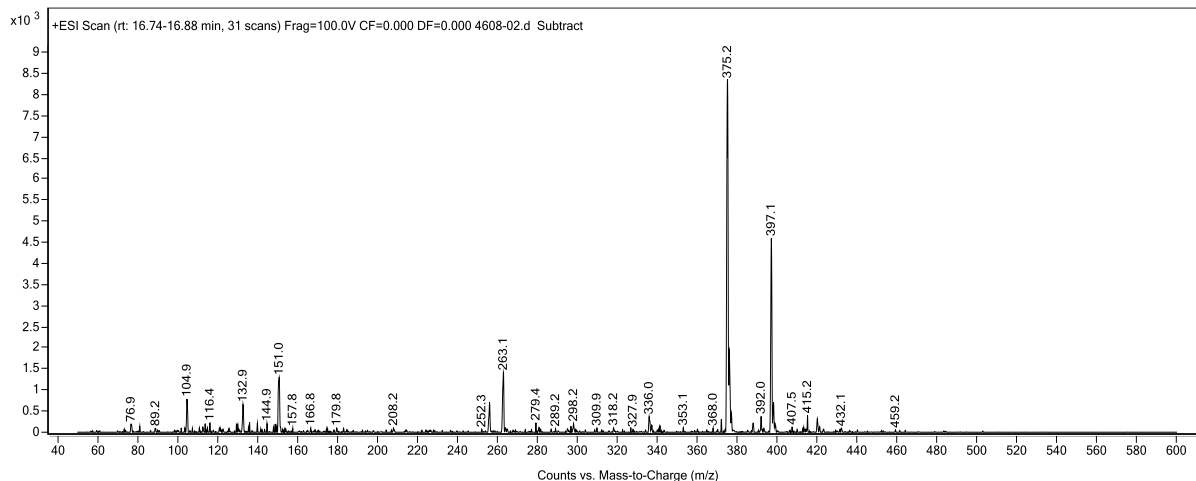

质谱图 Peak (15) in "+" TIC Scan - 4608-02.d" 裂解电压 100 碰撞能量 0 电离模式 ESI

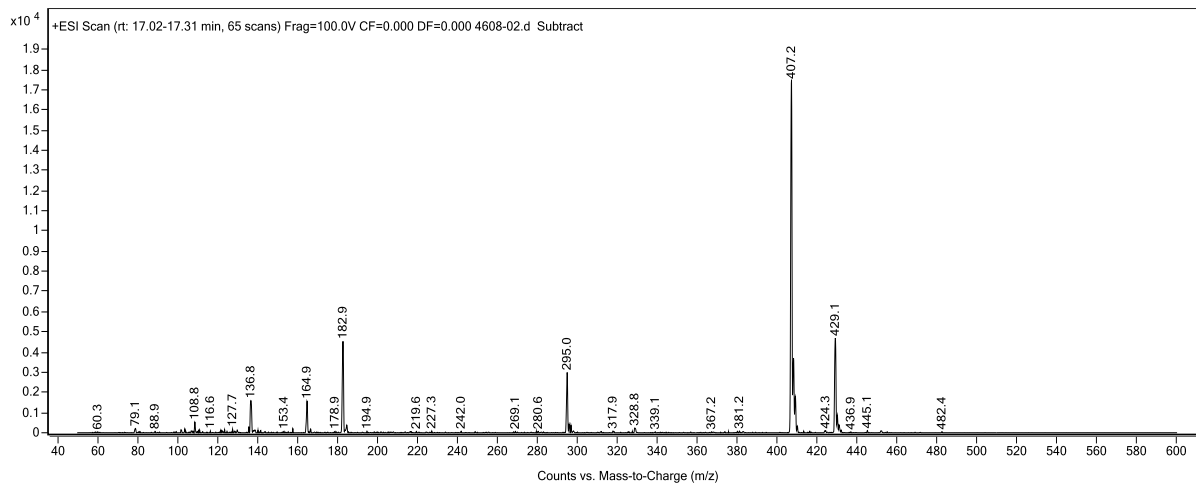

# 分析报告

质谱图 Peak (16) in "+ TIC Scan - 4608-02.d" 裂解电压 100 碰撞能量 0 电离模式 ESI

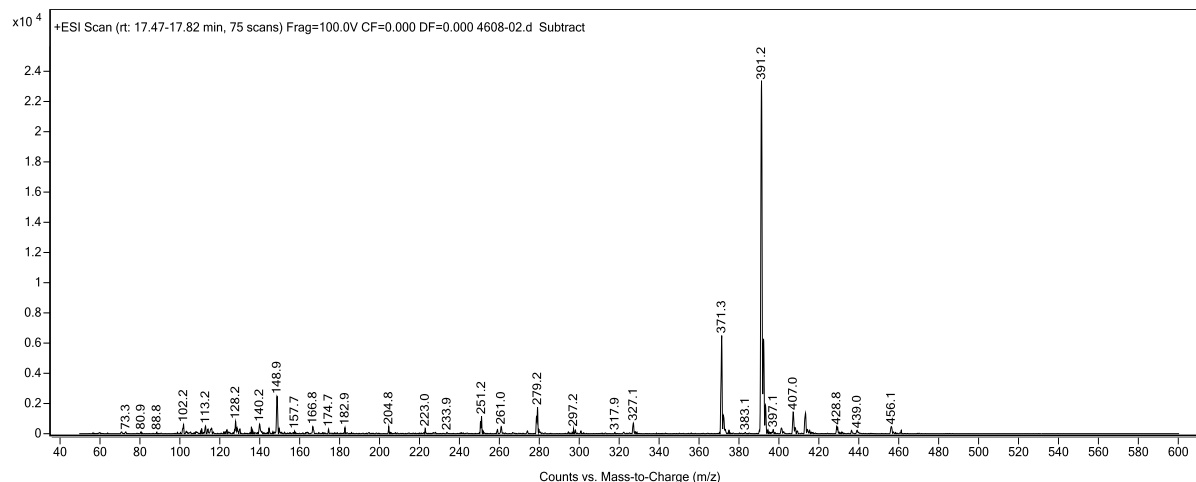

质谱图 Peak (17) in "+ TIC Scan - 4608-02.d" 裂解电压 100 碰撞能量 0 电离模式 ESI

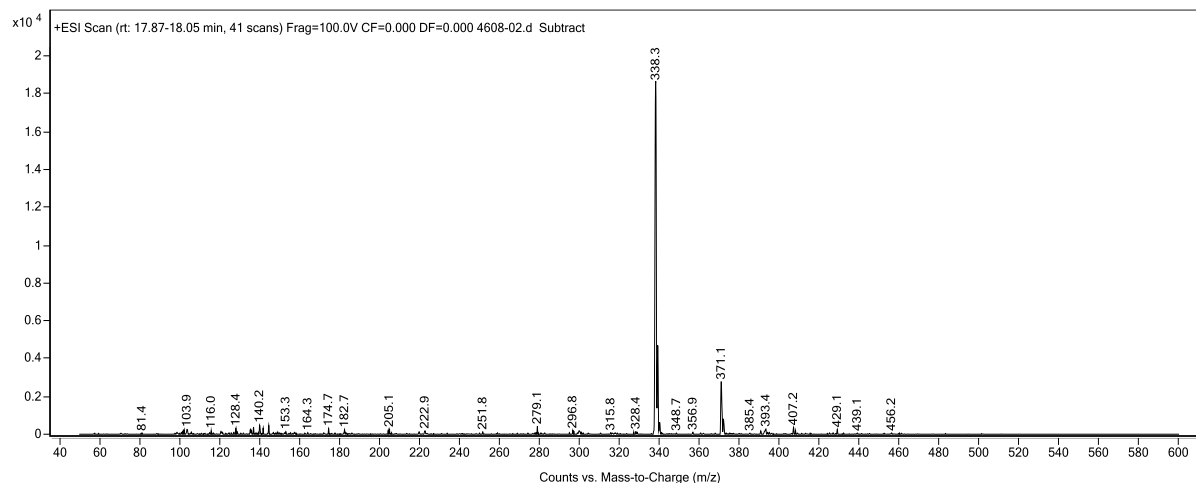

质谱图 Peak (18) in "+ TIC Scan - 4608-02.d" 裂解电压 100 碰撞能量 0 电离模式 ESI

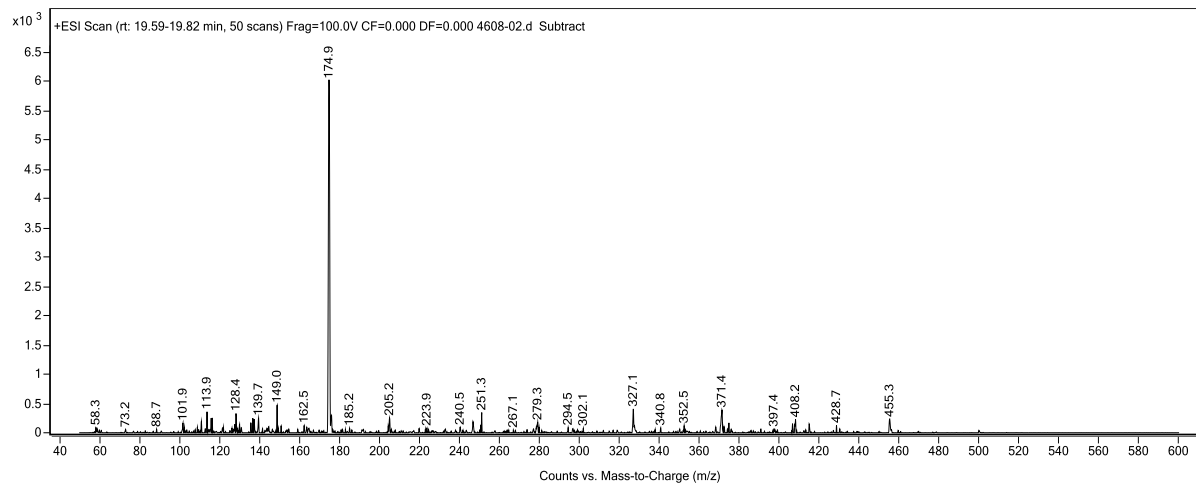

Supplement: Supplementary file 3 [file Prn_HPLCMSata.pdf › Supporting Dates-1/Prn_HPLCMSata.pdf]
