# Supplementary material for: Electron transfer engineering of artificially designed cell factory for complete biosynthesis of natural products
Source: Research Square preprint supplement (doi:10.21203/rs.3.rs-4718218/v1), 2024-08-01

# 分析报告

数据文件名称 4608-01.d 样品名称 4608-1  
样品类型 Sample 仪器名称 Agilent 1290II-6460  
采集方法 Test-20040520-01.m 采集时间 5/20/2024 5:12:38 PM

User Chromatograms

裂解电压 100 碰撞能量 0 电离模式 ESI

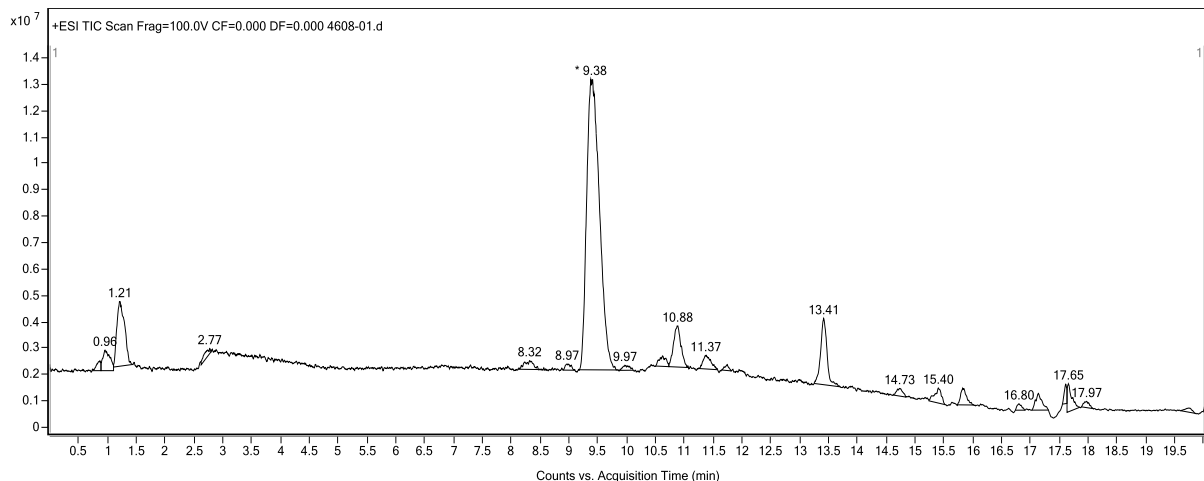

积分峰列表

| 峰  | 保留时间  | 峰高          | 面积          | 面积百分比, % | 总面积百分比, % |
|----|-------|-------------|-------------|----------|-----------|
| 1  | 0.87  | 371935.63   | 1835579.79  | 1.08     | 0.65      |
| 2  | 0.96  | 776584.13   | 6798911.36  | 4.01     | 2.42      |
| 3  | 1.21  | 2452075.76  | 22974559.76 | 13.54    | 8.18      |
| 4  | 2.77  | 191597.96   | 1999601.78  | 1.18     | 0.71      |
| 5  | 8.32  | 334659.75   | 3649160.18  | 2.15     | 1.3       |
| 6  | 8.97  | 232436.63   | 1616617.08  | 0.95     | 0.58      |
| 7  | 9.38  | 11004369.98 | 169733413.4 | 100      | 60.46     |
| 8  | 9.97  | 190067.69   | 1574883.3   | 0.93     | 0.56      |
| 9  | 10.62 | 395885.09   | 3229231.32  | 1.9      | 1.15      |
| 10 | 10.88 | 1556608.1   | 14024916.15 | 8.26     | 5         |
| 11 | 11.37 | 509469.21   | 4863311.69  | 2.87     | 1.73      |
| 12 | 11.74 | 225877.92   | 1049161.19  | 0.62     | 0.37      |
| 13 | 13.41 | 2506183.03  | 19114524.43 | 11.26    | 6.81      |
| 14 | 14.73 | 288501.26   | 2130493.24  | 1.26     | 0.76      |
| 15 | 15.4  | 570049.09   | 4608803.92  | 2.72     | 1.64      |
| 16 | 15.82 | 624348.95   | 4507500.52  | 2.66     | 1.61      |
| 17 | 16.8  | 243791.84   | 1347941.4   | 0.79     | 0.48      |
| 18 | 17.14 | 632208.15   | 4872568.09  | 2.87     | 1.74      |
| 19 | 17.61 | 735959.01   | 2184961.82  | 1.29     | 0.78      |
| 20 | 17.65 | 1061916.27  | 5737247.96  | 3.38     | 2.04      |
| 21 | 17.97 | 236994.59   | 1578701.73  | 0.93     | 0.56      |
| 22 | 19.74 | 154367.14   | 1300548.36  | 0.77     | 0.46      |

# 分析报告

质谱图 Peak (1) in "+" TIC Scan - 4608-01.d" 裂解电压 100 碰撞能量 0 电离模式 ESI

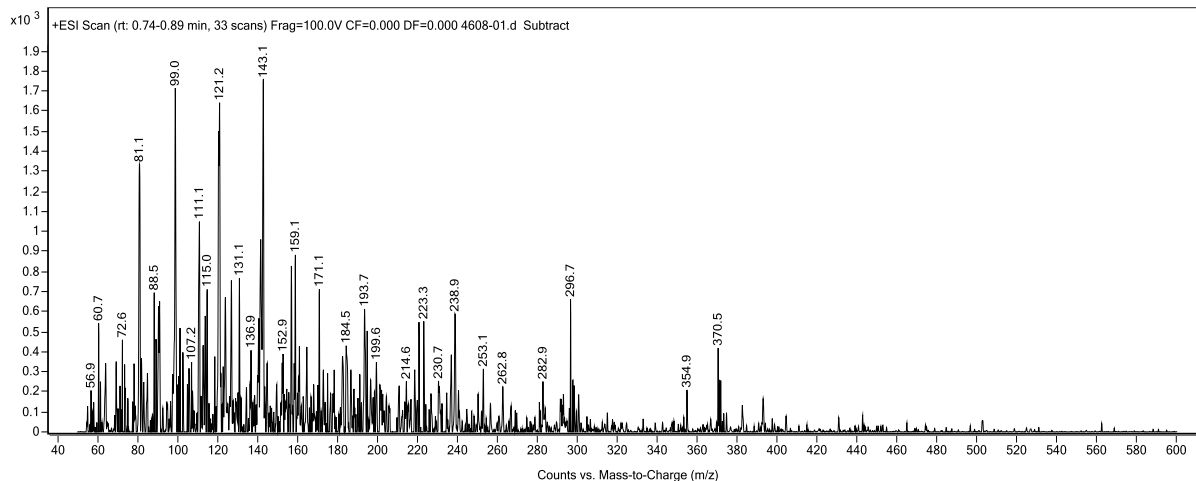

质谱图 Peak (2) in "+" TIC Scan - 4608-01.d" 裂解电压 100 碰撞能量 0 电离模式 ESI

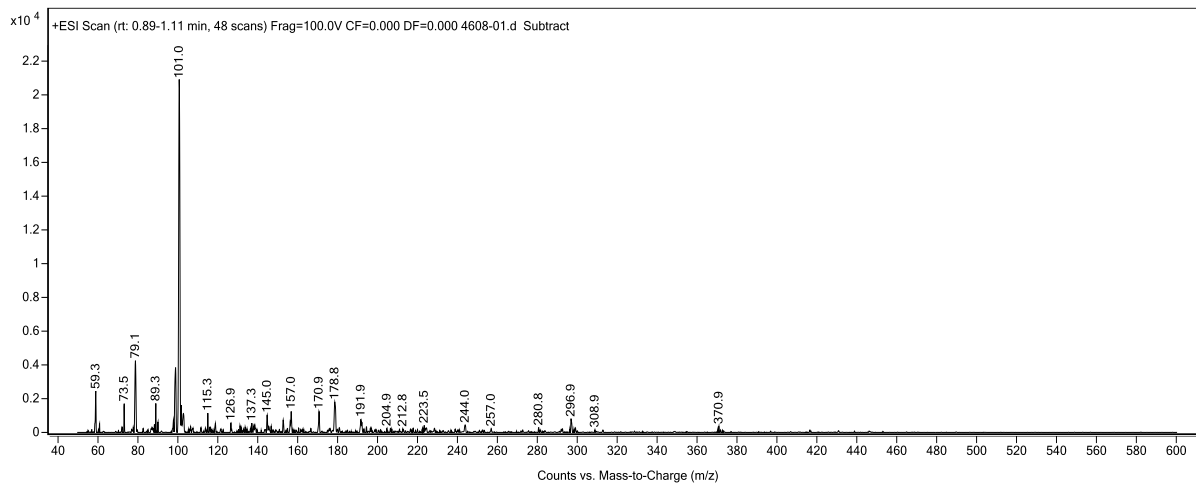

质谱图 Peak (3) in "+" TIC Scan - 4608-01.d" 裂解电压 100 碰撞能量 0 电离模式 ESI

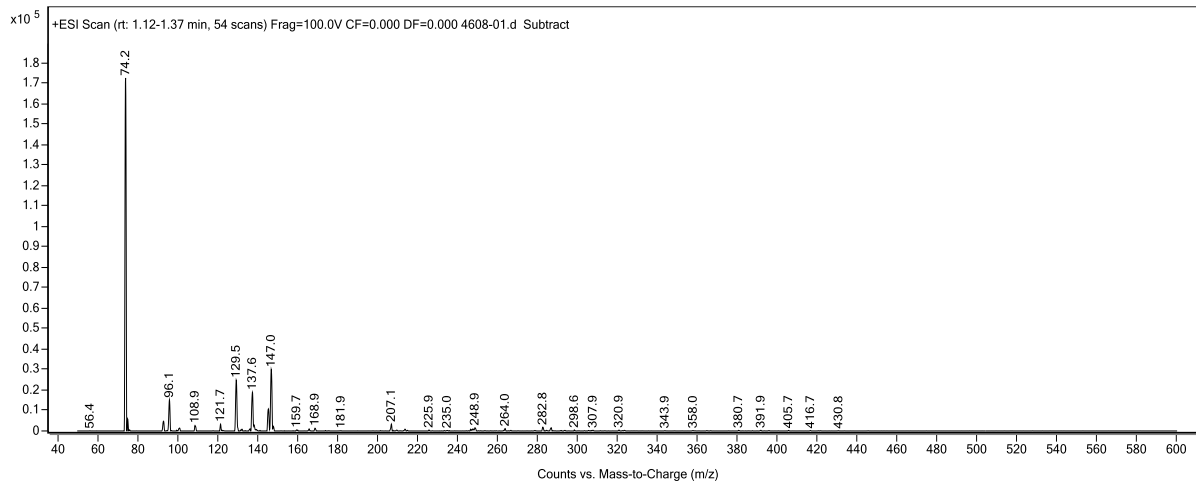

# 分析报告

质谱图 Peak (4) in "+ TIC Scan - 4608-01.d" 裂解电压 100 碰撞能量 0 电离模式 ESI

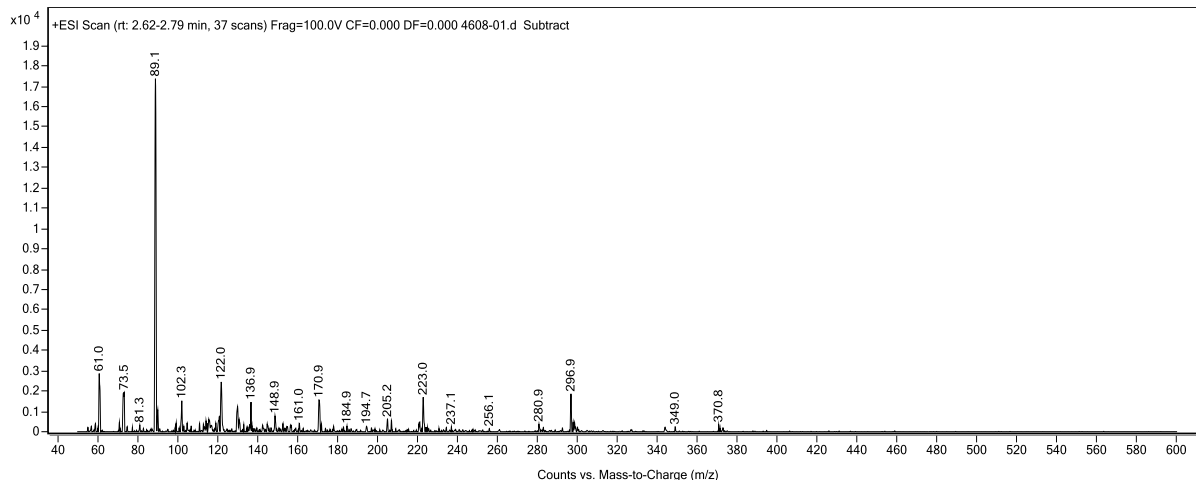

质谱图 Peak (5) in "+ TIC Scan - 4608-01.d" 裂解电压 100 碰撞能量 0 电离模式 ESI

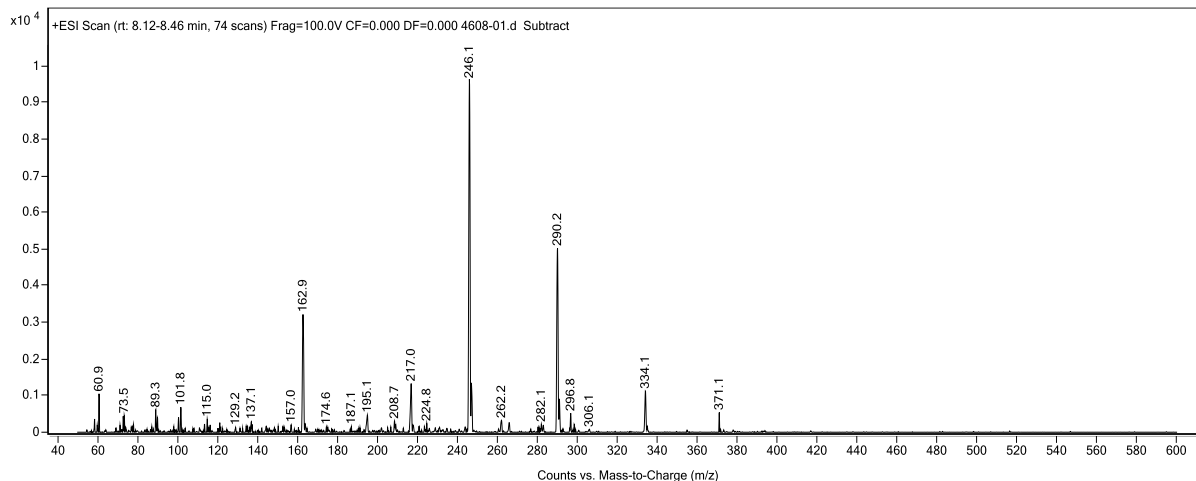

质谱图 Peak (6) in "+ TIC Scan - 4608-01.d" 裂解电压 100 碰撞能量 0 电离模式 ESI

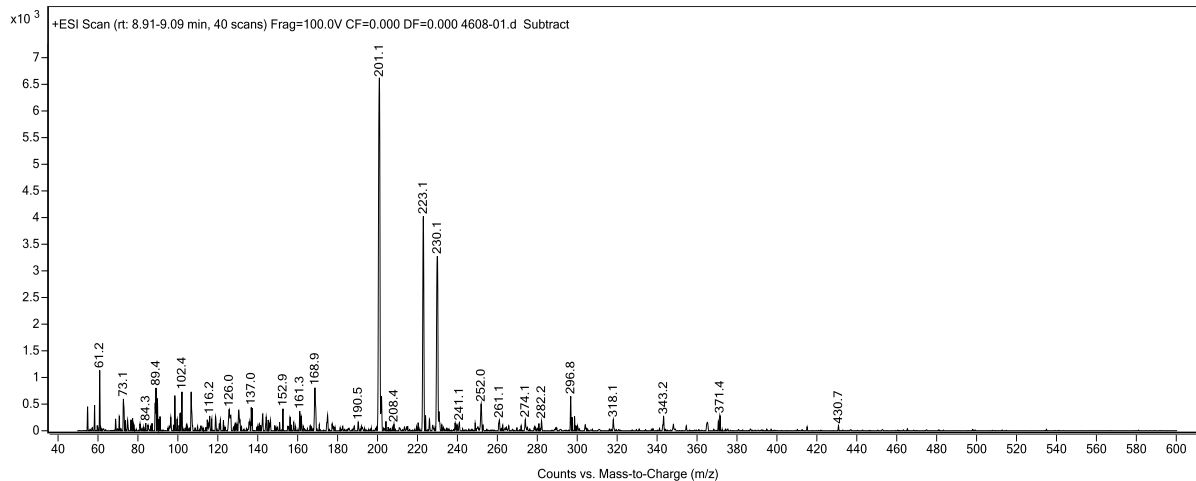

# 分析报告

质谱图 Peak (7) in "+ TIC Scan - 4608-01.d" 裂解电压 100 碰撞能量 0 电离模式 ESI

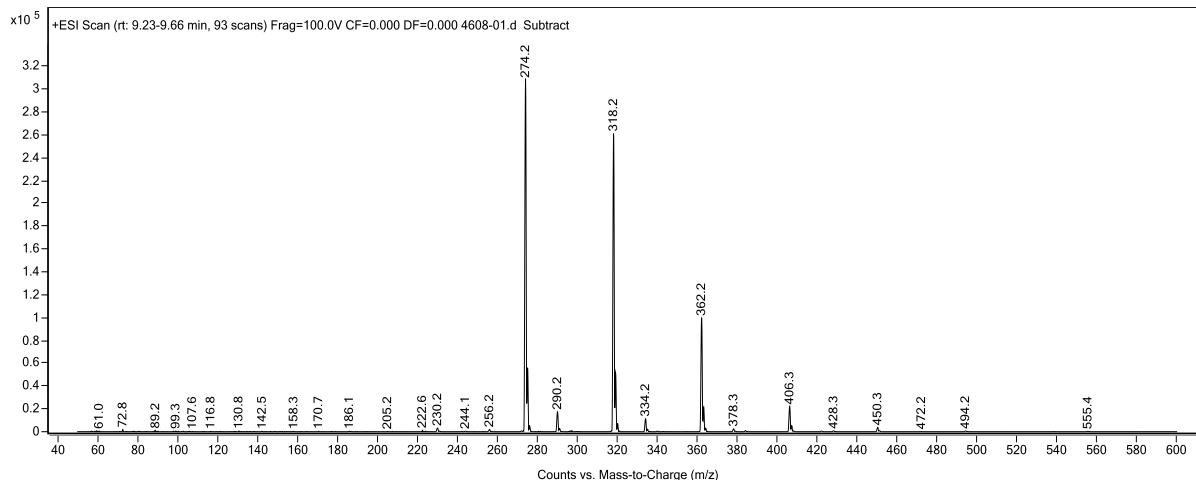

质谱图 Peak (8) in "+ TIC Scan - 4608-01.d" 裂解电压 100 碰撞能量 0 电离模式 ESI

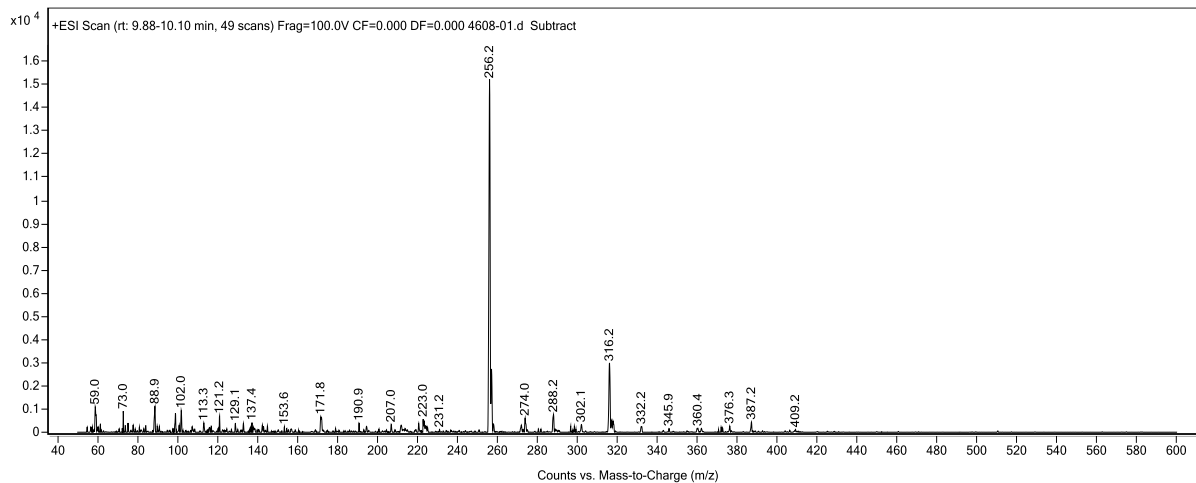

质谱图 Peak (9) in "+ TIC Scan - 4608-01.d" 裂解电压 100 碰撞能量 0 电离模式 ESI

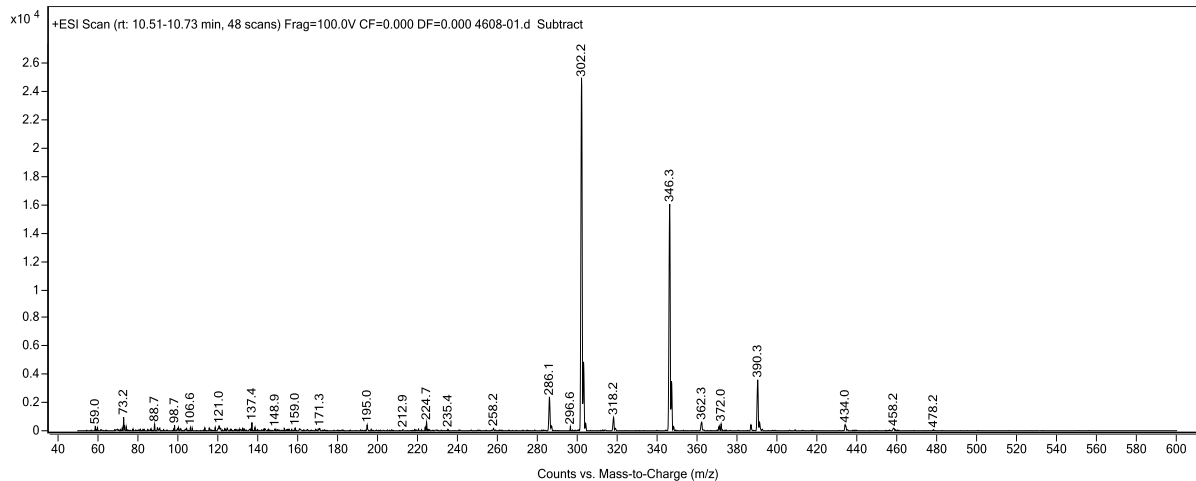

# 分析报告

质谱图 Peak (10) in "+" TIC Scan - 4608-01.d" 裂解电压 100 碰撞能量 0 电离模式 ESI

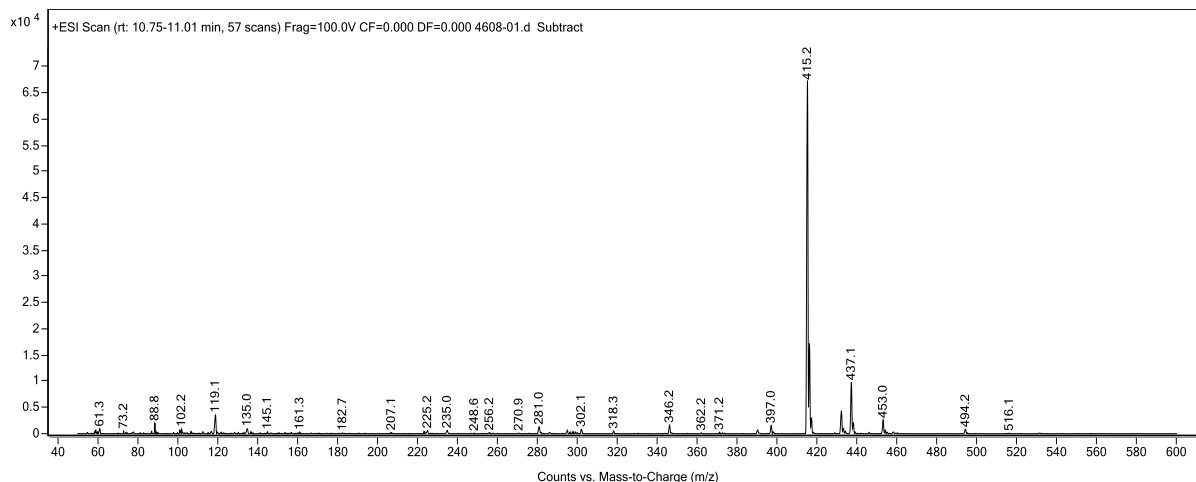

质谱图 Peak (11) in "+" TIC Scan - 4608-01.d" 裂解电压 100 碰撞能量 0 电离模式 ESI

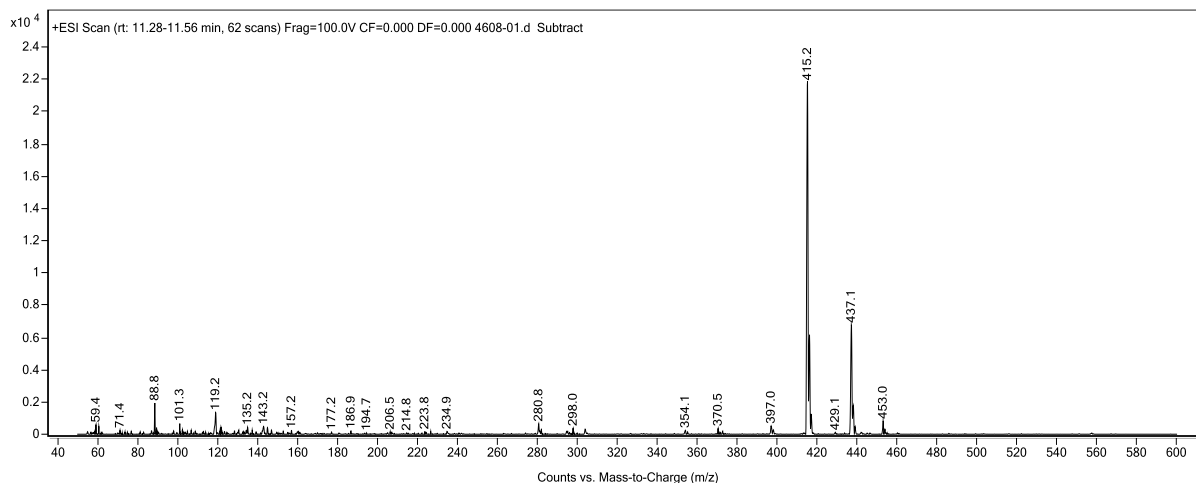

质谱图 Peak (12) in "+" TIC Scan - 4608-01.d" 裂解电压 100 碰撞能量 0 电离模式 ESI

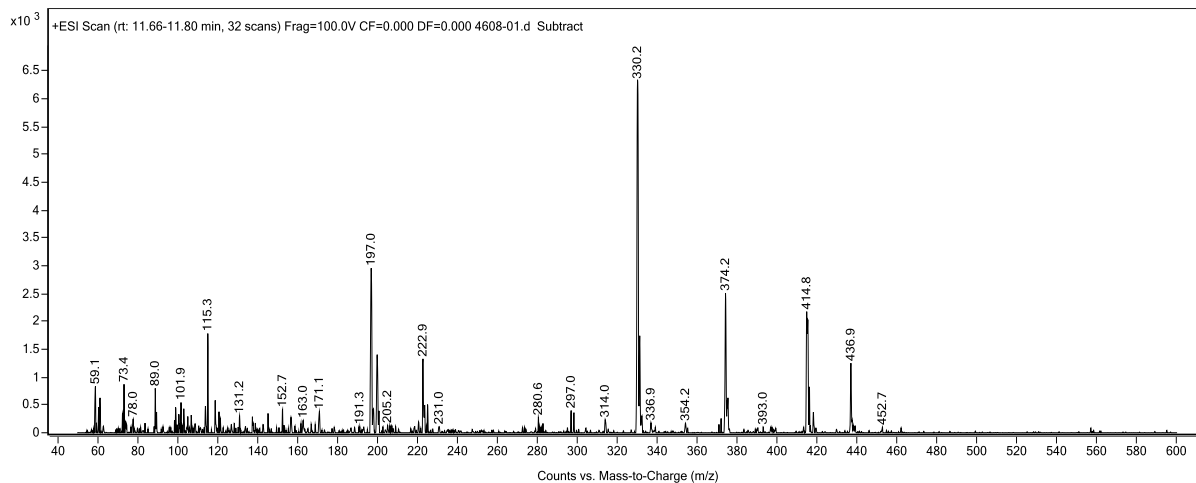

# 分析报告

质谱图 Peak (13) in "+" TIC Scan - 4608-01.d" 裂解电压 100 碰撞能量 0 电离模式 ESI

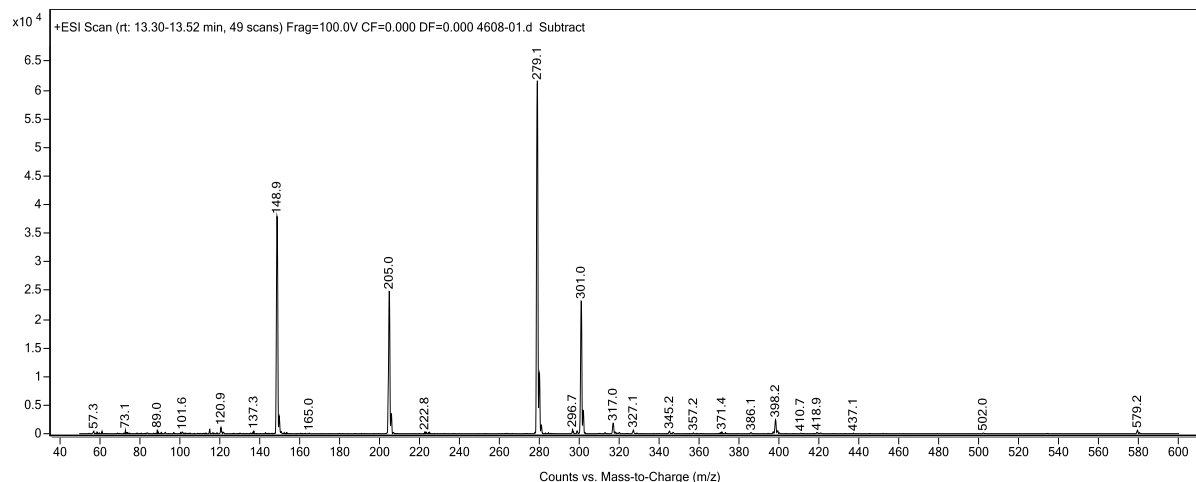

质谱图 Peak (14) in "+" TIC Scan - 4608-01.d" 裂解电压 100 碰撞能量 0 电离模式 ESI

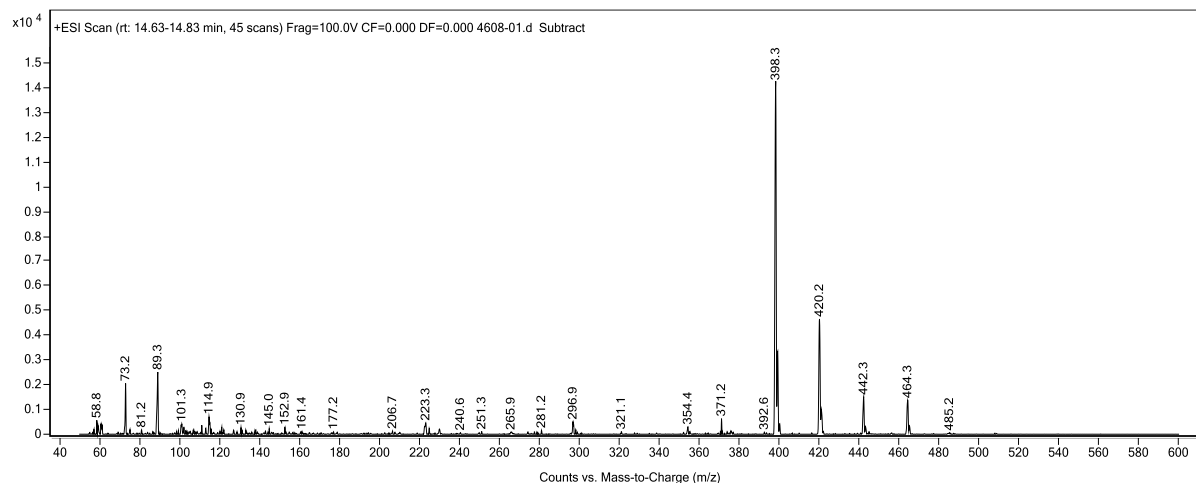

质谱图 Peak (15) in "+" TIC Scan - 4608-01.d" 裂解电压 100 碰撞能量 0 电离模式 ESI

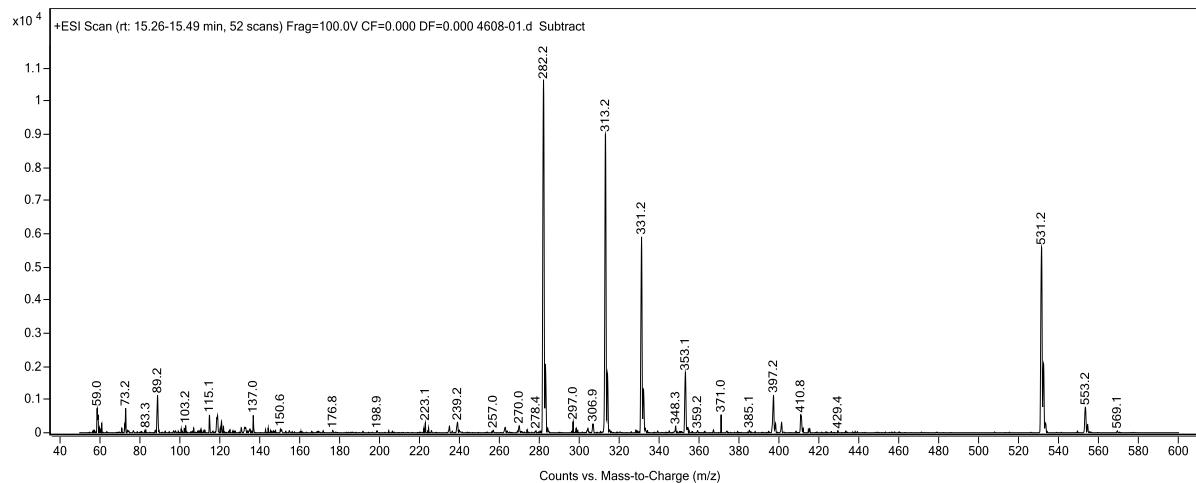

# 分析报告

质谱图 Peak (16) in "+ TIC Scan - 4608-01.d" 裂解电压 100 碰撞能量 0 电离模式 ESI

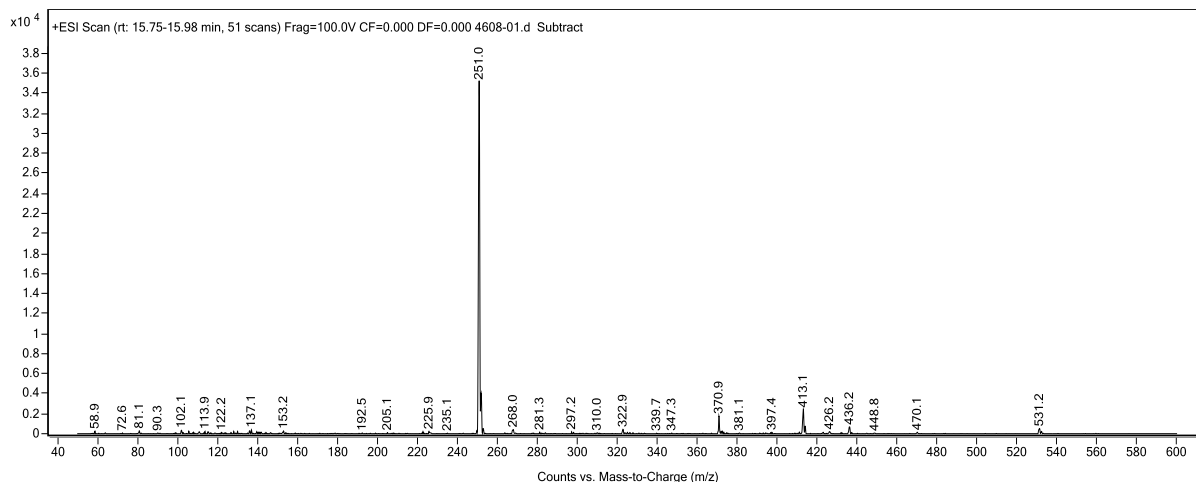

质谱图 Peak (17) in "+ TIC Scan - 4608-01.d" 裂解电压 100 碰撞能量 0 电离模式 ESI

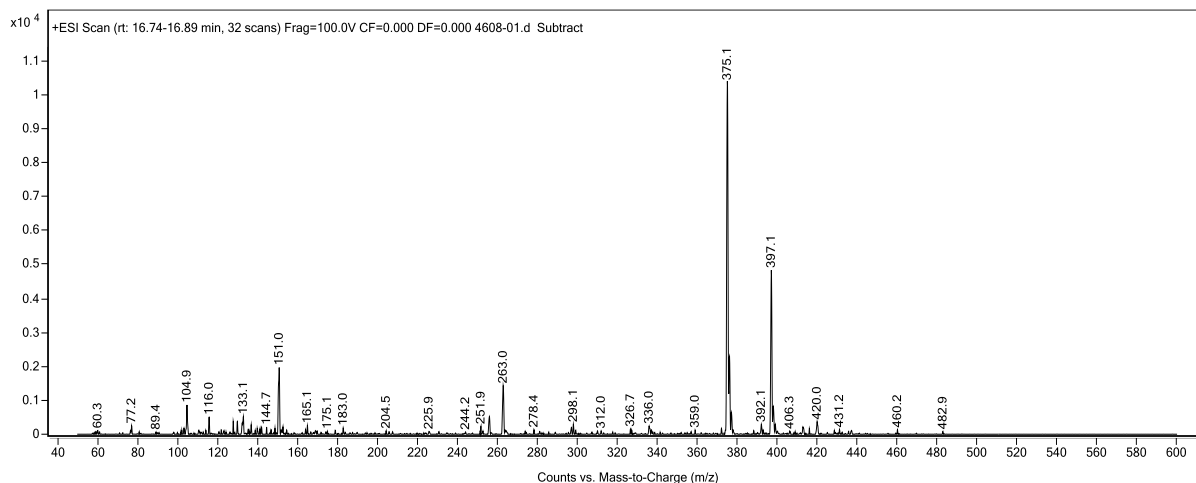

质谱图 Peak (18) in "+ TIC Scan - 4608-01.d" 裂解电压 100 碰撞能量 0 电离模式 ESI

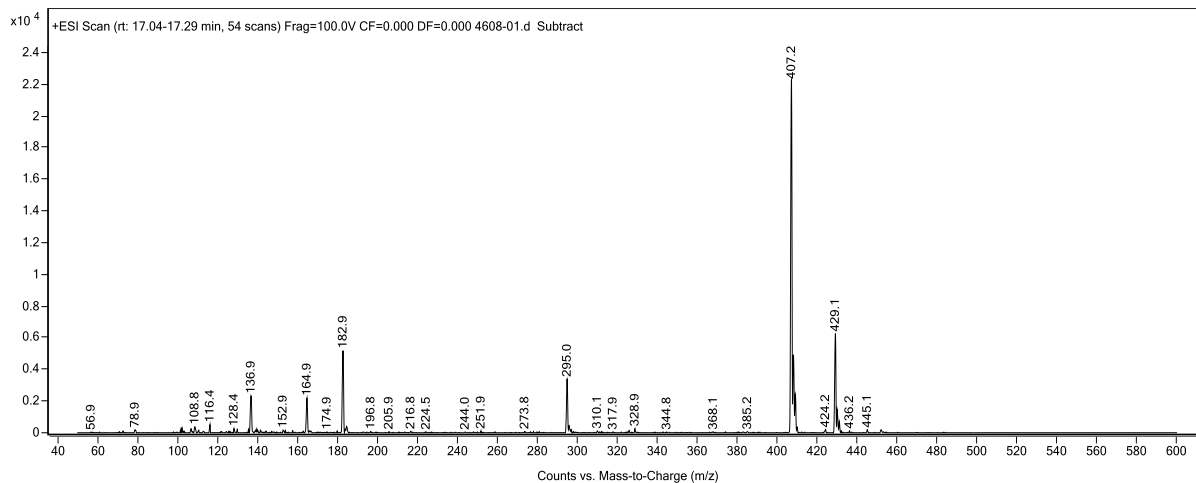

# 分析报告

质谱图 Peak (19) in "+" TIC Scan - 4608-01.d" 裂解电压 100 碰撞能量 0 电离模式 ESI

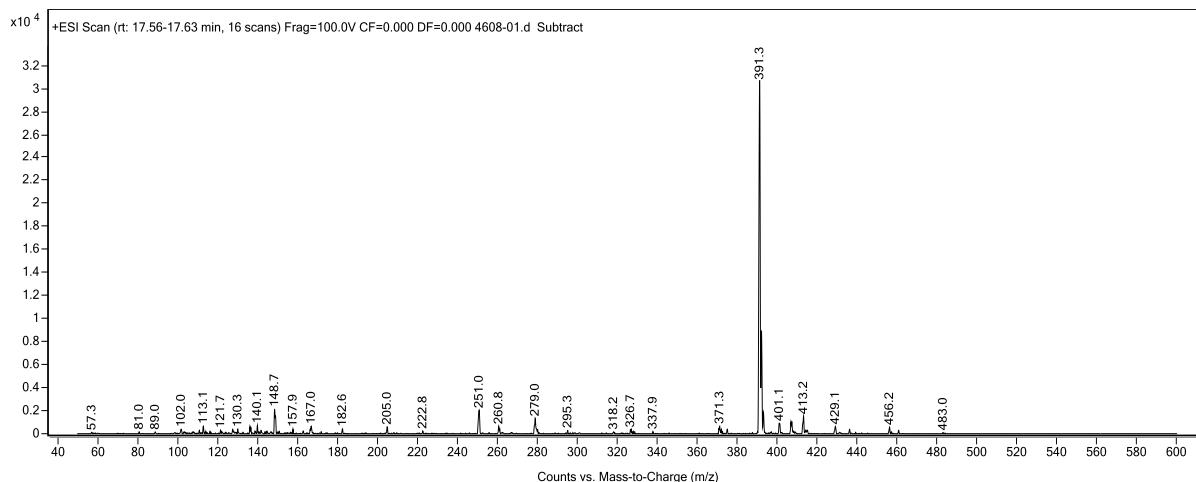

质谱图 Peak (20) in "+" TIC Scan - 4608-01.d" 裂解电压 100 碰撞能量 0 电离模式 ESI

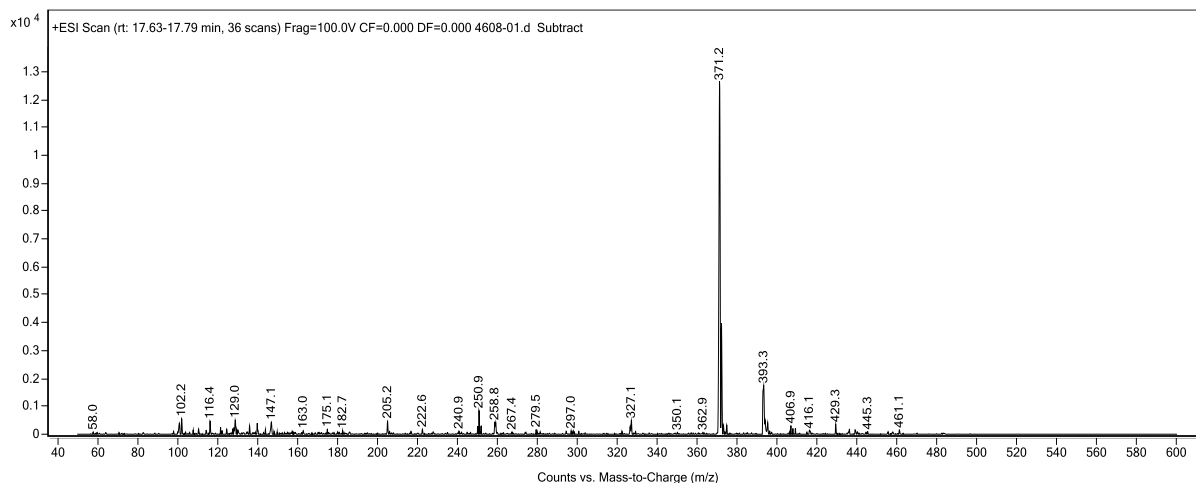

质谱图 Peak (21) in "+" TIC Scan - 4608-01.d" 裂解电压 100 碰撞能量 0 电离模式 ESI

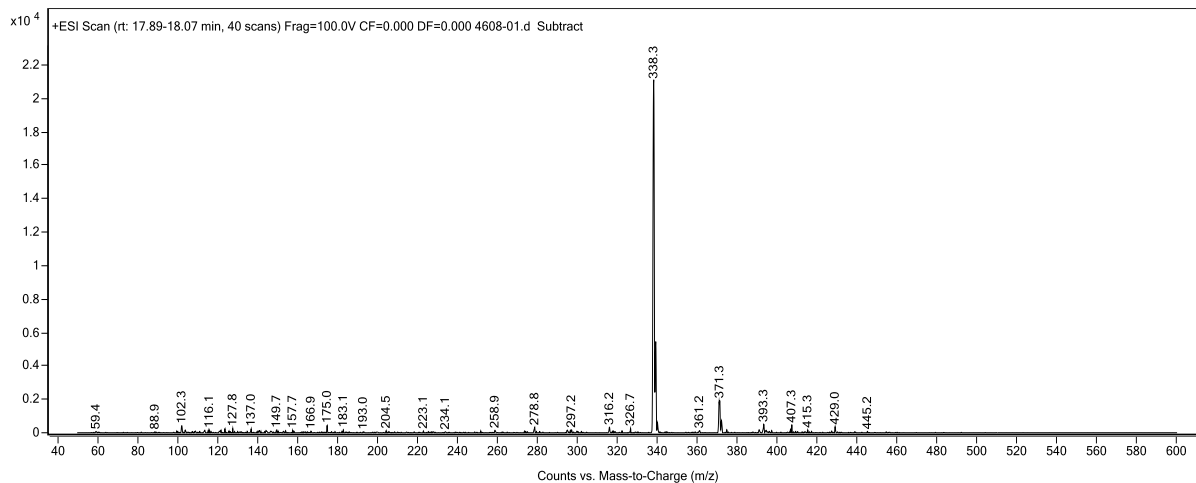



# 分析报告

质谱图 Peak (22) in "+ TIC Scan - 4608-01.d" 裂解电压 100 碰撞能量 0 电离模式 ESI

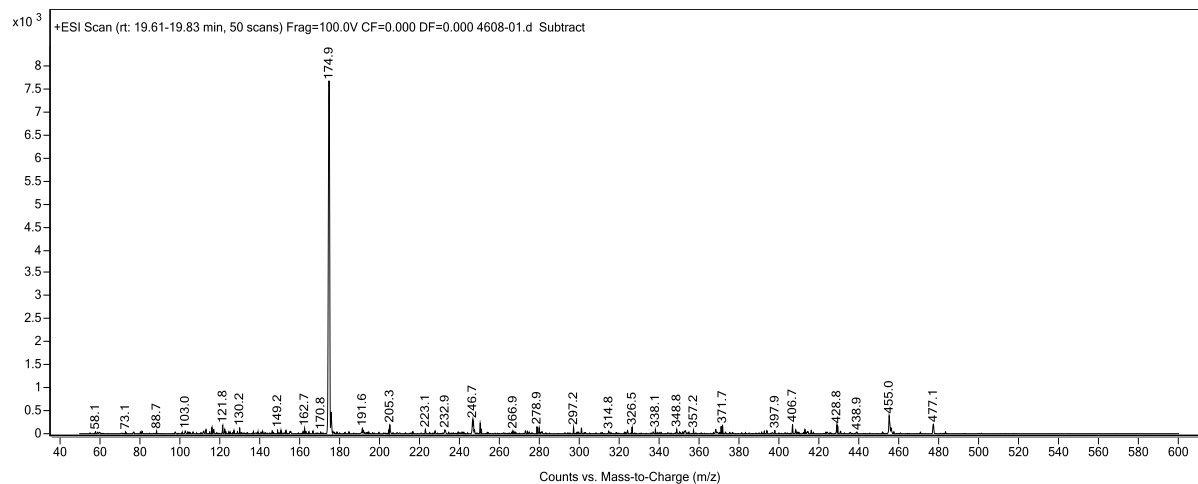

Supplement: Supplementary file 2 [file Cho_HPLCMSata.pdf › Supporting Dates-1/Cho_HPLCMSata.pdf]
