# Supplementary material for: Electron transfer engineering of artificially designed cell factory for complete biosynthesis of natural products
Source: Research Square preprint supplement (doi:10.21203/rs.3.rs-4718218/v1), 2024-08-01

分析报告

数据文件名称

Blank-r003.d

样品名称

Blank

样品类型

Sample

仪器名称

Agilent 1290II-6460

采集方法

Test-20040520-01.m

采集时间

5/20/2024 1:20:14 PM

User Chromatograms

裂解电压 100 碰撞能量 0 电离模式 ESI

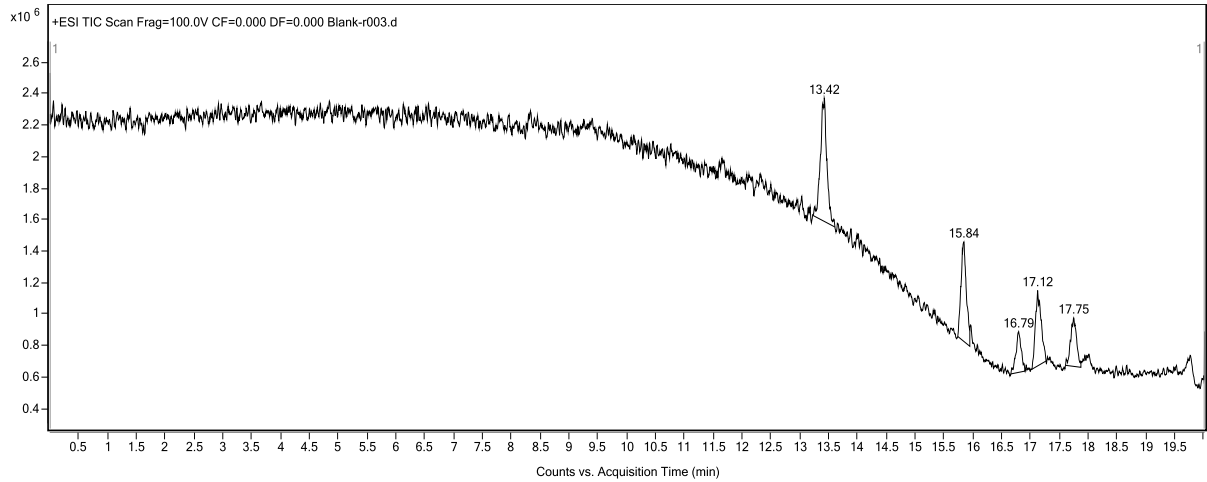

积分峰列表

| 峰 | 保留时间  | 峰高        | 面积         | 面积百分比, % | 总面积百分比, % |
|---|-------|-----------|------------|----------|-----------|
| 1 | 13.42 | 781598.53 | 6022363.63 | 100      | 34.87     |
| 2 | 15.84 | 632212.65 | 4059555.52 | 67.41    | 23.51     |
| 3 | 16.79 | 257728.81 | 1663623.23 | 27.62    | 9.63      |
| 4 | 17.12 | 478460.26 | 3314916.69 | 55.04    | 19.19     |
| 5 | 17.75 | 308072.67 | 2209313.04 | 36.69    | 12.79     |



# 分析报告

质谱图 Peak (1) in "+" TIC Scan - Blank-r003.d" 裂解电压 100 碰撞能量 0 电离模式 ESI

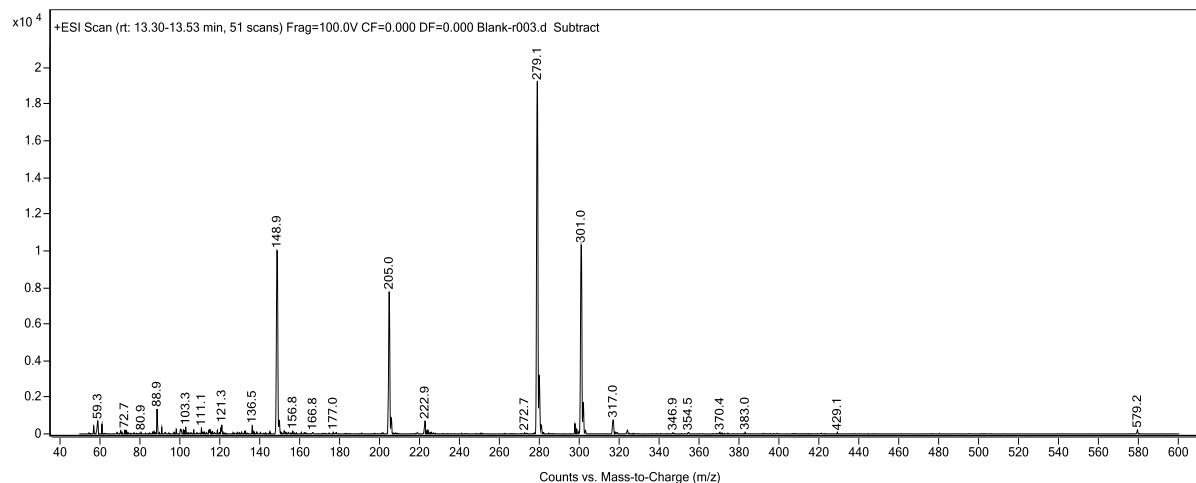

质谱图 Peak (2) in "+" TIC Scan - Blank-r003.d" 裂解电压 100 碰撞能量 0 电离模式 ESI

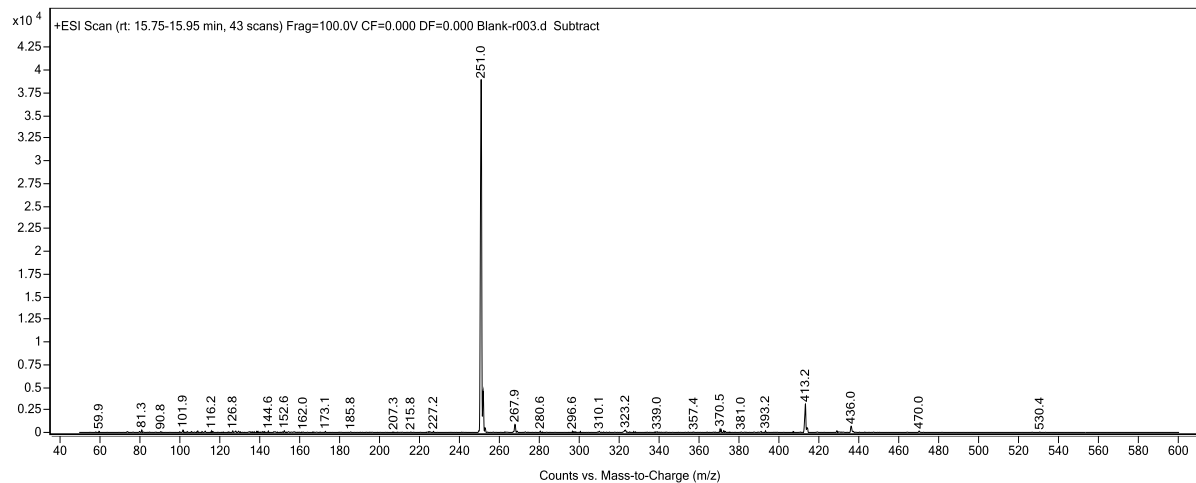

质谱图 Peak (3) in "+" TIC Scan - Blank-r003.d" 裂解电压 100 碰撞能量 0 电离模式 ESI

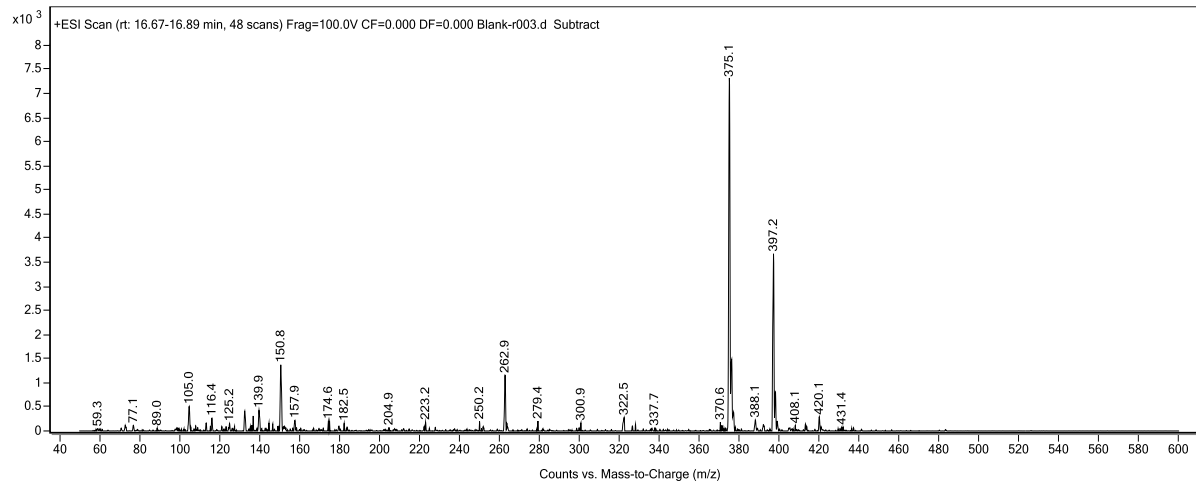



# 分析报告

质谱图 Peak (4) in "+ TIC Scan - Blank-r003.d" 裂解电压 100 碰撞能量 0 电离模式 ESI

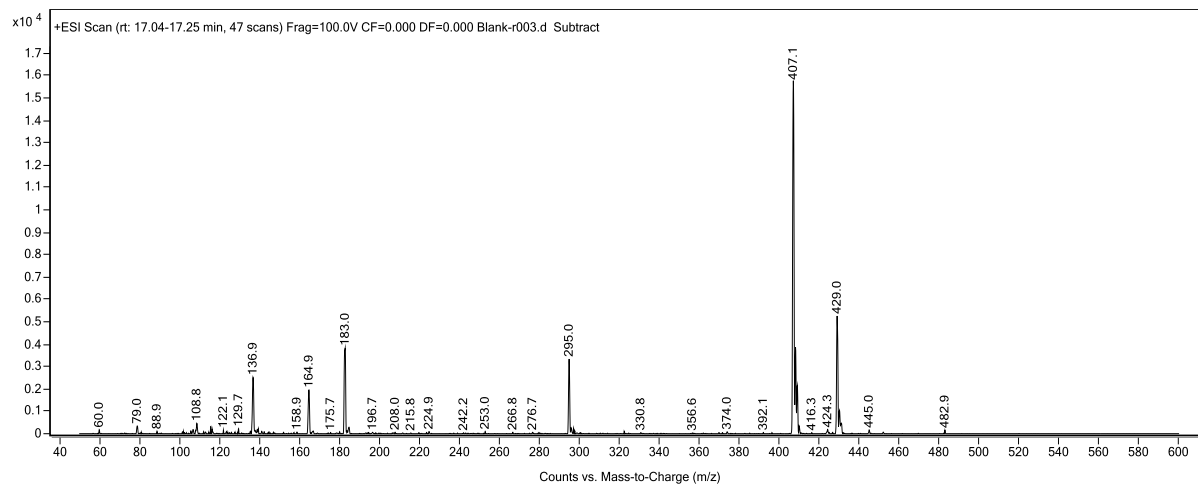

质谱图 Peak (5) in "+ TIC Scan - Blank-r003.d" 裂解电压 100 碰撞能量 0 电离模式 ESI

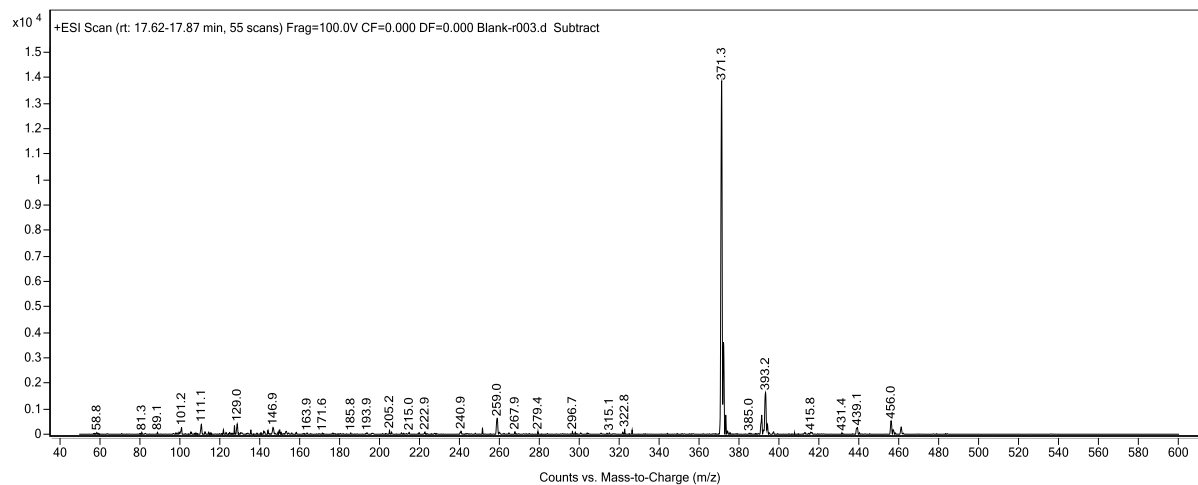

Supplement: Supplementary file 1 [file Blank-r003_Report.pdf › Supporting Dates-1/Blank-r003_Report.pdf]
