# Supplementary material for: Electron transfer engineering of artificially designed cell factory for complete biosynthesis of natural products
Source: Research Square preprint supplement (doi:10.21203/rs.3.rs-4718218/v1), 2024-08-01
Supplement: Supplementary file 1 [file MSdata_4608-01.XLS.xls]

## Sheet: Sheet1
+ESI Scan (rt: 0.74-0.89 min, 33 scans) Frag=100.0V CF=0.000 DF=0.000 4608-01.d Subtract
Index	X	Y
0	50	0.62
1	50.1	0
2	50.2	0.03
3	50.3	0.09
4	50.4	0.31
5	50.5	0.76
6	50.6	1.06
7	50.7	0.82
8	50.8	0.22
9	50.9	0
10	51.3	0
11	51.4	0.83
12	51.5	1.78
13	51.6	1.89
14	51.7	1.09
15	51.8	0.28
16	51.9	0.24
17	52	0.75
18	52.1	1.06
19	52.2	0.8
20	52.3	0.18
21	52.4	0
22	52.6	0
23	52.7	0.36
24	52.8	0.78
25	52.9	0
26	53.3	0
27	53.4	0.7
28	53.5	0
29	53.8	0
30	53.9	0.34
31	54	0.07
32	54.1	0
33	54.4	0
34	54.5	6.03
35	54.6	22.69
36	54.7	39.07
37	54.8	44.01
38	54.9	38.62
39	55	54.71
40	55.1	96.72
41	55.2	127.95
42	55.3	97.87
43	55.4	7.91
44	55.5	0
45	56	0
46	56.1	7.17
47	56.2	24.45
48	56.3	35.16
49	56.4	37.69
50	56.5	15.13
51	56.6	0
52	56.7	0
53	56.8	111.57
54	56.9	207.03
55	57	149.49
56	57.1	0
57	57.3	0
58	57.4	3.19
59	57.5	95.56
60	57.6	100.64
61	57.7	48.37
62	57.8	2.25
63	57.9	10.44
64	58	35.64
65	58.1	93.77
66	58.2	148.72
67	58.3	139.75
68	58.4	67.73
69	58.5	0
70	58.9	0
71	59	24.7
72	59.1	0
73	59.7	0
74	59.8	47.16
75	59.9	0
76	60.5	0
77	60.6	252.63
78	60.7	542.75
79	60.8	478.82
80	60.9	0
81	61.4	0
82	61.5	90.21
83	61.6	250.44
84	61.7	214.16
85	61.8	0
86	61.9	9.79
87	62	0
88	62.1	0
89	62.2	5.71
90	62.3	40.82
91	62.4	48.11
92	62.5	32.18
93	62.6	17.95
94	62.7	8.73
95	62.8	0.96
96	62.9	0
97	63.1	0
98	63.2	12.25
99	63.3	36.84
100	63.4	50.98
101	63.5	56.96
102	63.6	83.75
103	63.7	132.72
104	63.8	173.86
105	63.9	194.19
106	64	229.34
107	64.1	294.13
108	64.2	343.18
109	64.3	315.25
110	64.4	212.04
111	64.5	95.78
112	64.6	24.39
113	64.7	13.95
114	64.8	35.09
115	64.9	50.85
116	65	50.27
117	65.1	38.99
118	65.2	31.09
119	65.3	34.11
120	65.4	42.34
121	65.5	41.07
122	65.6	25.09
123	65.7	6.04
124	65.8	0
125	66	0
126	66.1	2.65
127	66.2	6.22
128	66.3	8.78
129	66.4	8.39
130	66.5	5.63
131	66.6	2.79
132	66.7	1.17
133	66.8	1.1
134	66.9	3.67
135	67	9.63
136	67.1	16.24
137	67.2	17.99
138	67.3	12.38
139	67.4	3.34
140	67.5	0
141	67.8	0
142	67.9	0.35
143	68	4.8
144	68.1	10.13
145	68.2	12.74
146	68.3	9.83
147	68.4	8.94
148	68.5	15.13
149	68.6	35.93
150	68.7	76.02
151	68.8	84.33
152	68.9	26.18
153	69	0
154	69.1	0
155	69.2	4.76
156	69.3	159.69
157	69.4	313.45
158	69.5	350.94
159	69.6	253.14
160	69.7	137.91
161	69.8	103.23
162	69.9	84.8
163	70	36.82
164	70.1	0
165	70.2	15.56
166	70.3	79.95
167	70.4	116.72
168	70.5	106.15
169	70.6	28.34
170	70.7	0
171	71.2	0
172	71.3	168.5
173	71.4	229.47
174	71.5	172.52
175	71.6	74.46
176	71.7	0
177	71.8	0
178	71.9	34.77
179	72	109.91
180	72.1	108.92
181	72.2	15.93
182	72.3	0
183	72.4	54.99
184	72.5	317.92
185	72.6	459.3
186	72.7	16.86
187	72.8	0
188	73.6	0
189	73.7	336.22
190	73.8	166.12
191	73.9	179.52
192	74	209.16
193	74.1	219.67
194	74.2	127.86
195	74.3	0
196	74.6	0
197	74.7	4.52
198	74.8	12.72
199	74.9	0
200	75.1	0
201	75.2	52.76
202	75.3	167.83
203	75.4	141.65
204	75.5	32.89
205	75.6	0
206	75.7	0
207	75.8	9.96
208	75.9	1.38
209	76	0
210	77.5	0
211	77.6	41.7
212	77.7	150.8
213	77.8	111.65
214	77.9	0
215	78.2	0
216	78.3	214.6
217	78.4	340.36
218	78.5	320.43
219	78.6	183.45
220	78.7	60.72
221	78.8	63.91
222	78.9	120.52
223	79	130.51
224	79.1	97.23
225	79.2	80.5
226	79.3	79.82
227	79.4	52.27
228	79.5	0
229	80	0
230	80.1	3.08
231	80.2	29.27
232	80.3	34.46
233	80.4	60.71
234	80.5	108.4
235	80.6	208.48
236	80.7	418.16
237	80.8	745.59
238	80.9	1085.4
239	81	1288.18
240	81.1	1335.44
241	81.2	1330.59
242	81.3	1279.05
243	81.4	1046.2
244	81.5	605.67
245	81.6	165.29
246	81.7	3.01
247	81.8	61.28
248	81.9	193.76
249	82	313.13
250	82.1	366.47
251	82.2	345.32
252	82.3	269.99
253	82.4	175.18
254	82.5	89.08
255	82.6	25.51
256	82.7	0
257	82.8	0
258	82.9	8.13
259	83	73.04
260	83.1	166.03
261	83.2	241.19
262	83.3	248.08
263	83.4	186.85
264	83.5	106.57
265	83.6	53.14
266	83.7	36.69
267	83.8	15.99
268	83.9	0
269	84.3	0
270	84.4	24.54
271	84.5	89.19
272	84.6	133.98
273	84.7	149.23
274	84.8	152.69
275	84.9	169.11
276	85	231.2
277	85.1	293.11
278	85.2	258.11
279	85.3	119.5
280	85.4	0
281	85.5	0
282	85.6	1.63
283	85.7	25.62
284	85.8	14.82
285	85.9	0
286	86.4	0
287	86.5	29.63
288	86.6	59.38
289	86.7	0
290	87	0
291	87.1	64.17
292	87.2	59.75
293	87.3	0
294	87.4	0
295	87.5	40.69
296	87.6	86.38
297	87.7	83.77
298	87.8	57.2
299	87.9	0
300	88.2	0
301	88.3	103.55
302	88.4	474.17
303	88.5	694.82
304	88.6	463.33
305	88.7	0
306	89.3	0
307	89.4	463.12
308	89.5	409.14
309	89.6	5.71
310	89.7	0
311	90	0
312	90.1	47.98
313	90.2	163.6
314	90.3	243.16
315	90.4	320.64
316	90.5	444.2
317	90.6	580.82
318	90.7	627.17
319	90.8	519.31
320	90.9	396.07
321	91	426.05
322	91.1	575.06
323	91.2	650.72
324	91.3	544.91
325	91.4	332.1
326	91.5	142.24
327	91.6	38.2
328	91.7	0
329	92	0
330	92.1	6.77
331	92.2	0
332	92.4	0
333	92.5	12.33
334	92.6	70.54
335	92.7	113.19
336	92.8	120.1
337	92.9	110.28
338	93	75.49
339	93.1	19.6
340	93.2	0
341	93.8	0
342	93.9	7.76
343	94	9.29
344	94.1	5.9
345	94.2	3.58
346	94.3	5.23
347	94.4	10.5
348	94.5	20.78
349	94.6	52.8
350	94.7	113.17
351	94.8	151.2
352	94.9	138.16
353	95	111.91
354	95.1	124.33
355	95.2	139.49
356	95.3	89.93
357	95.4	2.72
358	95.5	0
359	95.6	0
360	95.7	2.22
361	95.8	28.26
362	95.9	53.8
363	96	65.56
364	96.1	55.48
365	96.2	34.47
366	96.3	23.35
367	96.4	33.28
368	96.5	71.86
369	96.6	123.4
370	96.7	152.63
371	96.8	122.68
372	96.9	56.19
373	97	0
374	97.4	0
375	97.5	67.98
376	97.6	218.39
377	97.7	287.52
378	97.8	262.13
379	97.9	212.05
380	98	191.4
381	98.1	201.02
382	98.2	241.56
383	98.3	306.84
384	98.4	384.29
385	98.5	442.65
386	98.6	458.86
387	98.7	567.33
388	98.8	895
389	98.9	1366.25
390	99	1714.65
391	99.1	1706.15
392	99.2	1376.35
393	99.3	984.04
394	99.4	715.67
395	99.5	533.24
396	99.6	292.98
397	99.7	124.8
398	99.8	0
399	100	0
400	100.1	101.89
401	100.2	235.69
402	100.3	175.6
403	100.4	0
404	100.6	0
405	100.7	78.79
406	100.8	278.32
407	100.9	42.28
408	101	0
409	101.2	0
410	101.3	315.49
411	101.4	518.26
412	101.5	286.67
413	101.6	32.91
414	101.7	0
415	102.6	0
416	102.7	129.02
417	102.8	396.93
418	102.9	389.48
419	103	265.21
420	103.1	149.11
421	103.2	47.05
422	103.3	0
423	104.9	0
424	105	120.3
425	105.1	238.95
426	105.2	218
427	105.3	62.49
428	105.4	0
429	105.5	0
430	105.6	46.09
431	105.7	195.02
432	105.8	293.77
433	105.9	317.47
434	106	292.55
435	106.1	231.06
436	106.2	145.92
437	106.3	64.54
438	106.4	0
439	106.9	0
440	107	61.41
441	107.1	297.2
442	107.2	348.14
443	107.3	166.61
444	107.4	17.15
445	107.5	75.04
446	107.6	201.19
447	107.7	199.56
448	107.8	165.06
449	107.9	122.55
450	108	51.73
451	108.1	0
452	108.2	6.04
453	108.3	65.27
454	108.4	106.5
455	108.5	80.98
456	108.6	47.31
457	108.7	32.93
458	108.8	40.25
459	108.9	39.29
460	109	3.64
461	109.1	0
462	109.3	0
463	109.4	6.32
464	109.5	12.61
465	109.6	14.29
466	109.7	47.94
467	109.8	90.98
468	109.9	93.13
469	110	50.89
470	110.1	0.3
471	110.2	0
472	110.3	2.3
473	110.4	78.93
474	110.5	275.54
475	110.6	515.83
476	110.7	696.21
477	110.8	787.08
478	110.9	865.08
479	111	981.03
480	111.1	1049.02
481	111.2	924.48
482	111.3	587.57
483	111.4	203.4
484	111.5	0
485	111.6	0
486	111.7	44.53
487	111.8	135.07
488	111.9	179.36
489	112	165.69
490	112.1	118.96
491	112.2	77.33
492	112.3	46.95
493	112.4	20.21
494	112.5	18.27
495	112.6	68.39
496	112.7	171
497	112.8	304.01
498	112.9	413.27
499	113	432.5
500	113.1	355.46
501	113.2	252.68
502	113.3	178.07
503	113.4	101.29
504	113.5	33.83
505	113.6	51.19
506	113.7	191.72
507	113.8	377.64
508	113.9	514.49
509	114	578.56
510	114.1	552.02
511	114.2	379.77
512	114.3	70.56
513	114.4	0
514	114.6	0
515	114.7	206.74
516	114.8	495.65
517	114.9	684.36
518	115	710.92
519	115.1	530.29
520	115.2	197.35
521	115.3	0
522	115.7	0
523	115.8	97.32
524	115.9	143.02
525	116	86.54
526	116.1	60.06
527	116.2	17.15
528	116.3	0
529	116.5	0
530	116.6	44.89
531	116.7	66.01
532	116.8	0
533	117.2	0
534	117.3	41.53
535	117.4	28.44
536	117.5	12.62
537	117.6	12.66
538	117.7	52.88
539	117.8	88.66
540	117.9	79.78
541	118	36.92
542	118.1	0
543	118.2	2.24
544	118.3	0
545	118.5	0
546	118.6	93.53
547	118.7	291.77
548	118.8	375.87
549	118.9	270.04
550	119	51.32
551	119.1	0
552	119.3	0
553	119.4	107.41
554	119.5	126.72
555	119.6	34.41
556	119.7	0
557	119.8	19.69
558	119.9	100.78
559	120	180.07
560	120.1	212.64
561	120.2	225.7
562	120.3	299.32
563	120.4	513.57
564	120.5	903.08
565	120.6	1311.48
566	120.7	1500.6
567	120.8	1436.58
568	120.9	1329.52
569	121	1391.58
570	121.1	1576.44
571	121.2	1642.28
572	121.3	1423.93
573	121.4	979.49
574	121.5	520.55
575	121.6	254.45
576	121.7	223.69
577	121.8	294.61
578	121.9	276.21
579	122	74.83
580	122.1	0
581	122.3	0
582	122.4	133.84
583	122.5	136.27
584	122.6	19.8
585	122.7	0
586	122.8	73.06
587	122.9	247.13
588	123	325.88
589	123.1	246.35
590	123.2	113.4
591	123.3	73.74
592	123.4	140.38
593	123.5	206.48
594	123.6	228.53
595	123.7	258.54
596	123.8	367.72
597	123.9	530.75
598	124	652.28
599	124.1	672.23
600	124.2	598.17
601	124.3	468.17
602	124.4	298.56
603	124.5	161.6
604	124.6	98.48
605	124.7	109.22
606	124.8	121.57
607	124.9	103.84
608	125	93.59
609	125.1	114.83
610	125.2	137.48
611	125.3	141.36
612	125.4	135.53
613	125.5	118.42
614	125.6	84.28
615	125.7	32.84
616	125.8	8.59
617	125.9	27.32
618	126	59.82
619	126.1	108.13
620	126.2	157.19
621	126.3	178.44
622	126.4	151.08
623	126.5	125.69
624	126.6	165.14
625	126.7	262.74
626	126.8	372.21
627	126.9	503.91
628	127	657.9
629	127.1	755.39
630	127.2	676.93
631	127.3	431.03
632	127.4	178.44
633	127.5	51.85
634	127.6	41.52
635	127.7	88.28
636	127.8	130
637	127.9	153.09
638	128	155.96
639	128.1	129.86
640	128.2	77.47
641	128.3	43.29
642	128.4	62.45
643	128.5	96.27
644	128.6	8.7
645	128.7	0
646	129	0
647	129.1	146.36
648	129.2	168.51
649	129.3	131.72
650	129.4	129.93
651	129.5	149.33
652	129.6	149.13
653	129.7	99.96
654	129.8	74.31
655	129.9	64.19
656	130	58.32
657	130.1	51.36
658	130.2	66.81
659	130.3	141.62
660	130.4	196.25
661	130.5	155.57
662	130.6	27.76
663	130.7	0
664	130.8	29.02
665	130.9	321.35
666	131	639.73
667	131.1	766.57
668	131.2	624.93
669	131.3	332.27
670	131.4	74.98
671	131.5	0
672	131.7	0
673	131.8	93.7
674	131.9	170.51
675	132	166.83
676	132.1	91.94
677	132.2	17.67
678	132.3	3.12
679	132.4	26.42
680	132.5	25.22
681	132.6	0
682	133.2	0
683	133.3	37.7
684	133.4	23.73
685	133.5	0
686	134.1	0
687	134.2	5.52
688	134.3	66.24
689	134.4	114.36
690	134.5	173.1
691	134.6	221.63
692	134.7	214.65
693	134.8	97.62
694	134.9	0
695	135.4	0
696	135.5	48.65
697	135.6	68.21
698	135.7	32.26
699	135.8	14.03
700	135.9	18.18
701	136	15.89
702	136.1	5.18
703	136.2	27.95
704	136.3	108.46
705	136.4	239.74
706	136.5	235.52
707	136.6	129.84
708	136.7	135.02
709	136.8	292.79
710	136.9	407.23
711	137	323.3
712	137.1	86.17
713	137.2	0
714	137.5	0
715	137.6	0.28
716	137.7	118.94
717	137.8	143.38
718	137.9	148.34
719	138	119.89
720	138.1	74.71
721	138.2	40.32
722	138.3	30.31
723	138.4	32.37
724	138.5	58.01
725	138.6	122.18
726	138.7	183.6
727	138.8	169.99
728	138.9	61.06
729	139	0
730	139.2	0
731	139.3	85.77
732	139.4	122.14
733	139.5	136.22
734	139.6	120.37
735	139.7	77.72
736	139.8	35.45
737	139.9	55.55
738	140	149.27
739	140.1	245.3
740	140.2	283.76
741	140.3	256.27
742	140.4	246.74
743	140.5	319.22
744	140.6	443.12
745	140.7	549.02
746	140.8	566.23
747	140.9	464.92
748	141	264.38
749	141.1	122.95
750	141.2	161.87
751	141.3	390.62
752	141.4	622.55
753	141.5	758.46
754	141.6	856.53
755	141.7	954.56
756	141.8	960.12
757	141.9	820.9
758	142	654.35
759	142.1	580.05
760	142.2	554.67
761	142.3	483.6
762	142.4	409.76
763	142.5	463.43
764	142.6	676.08
765	142.7	968.27
766	142.8	1252.46
767	142.9	1518.61
768	143	1745.29
769	143.1	1761.12
770	143.2	1398.73
771	143.3	779.78
772	143.4	267.45
773	143.5	68.26
774	143.6	126.07
775	143.7	209.87
776	143.8	225.64
777	143.9	184.21
778	144	147.3
779	144.1	130.5
780	144.2	96.84
781	144.3	0
782	144.4	0
783	144.5	42.09
784	144.6	146.53
785	144.7	218.1
786	144.8	277.68
787	144.9	339.35
788	145	343.13
789	145.1	259.6
790	145.2	162.47
791	145.3	113.21
792	145.4	78.8
793	145.5	24.14
794	145.6	0
795	145.7	0.37
796	145.8	34.96
797	145.9	75.34
798	146	95.58
799	146.1	75.78
800	146.2	34.31
801	146.3	24.03
802	146.4	72.11
803	146.5	130.34
804	146.6	118.79
805	146.7	37.6
806	146.8	0
807	146.9	0
808	147	29.37
809	147.1	107.06
810	147.2	119.78
811	147.3	83.83
812	147.4	56.73
813	147.5	48.13
814	147.6	46.06
815	147.7	26.85
816	147.8	5.36
817	147.9	1.03
818	148	20.21
819	148.1	56.42
820	148.2	89.71
821	148.3	99.71
822	148.4	70.89
823	148.5	18.28
824	148.6	0
825	149	0
826	149.1	34.49
827	149.2	32.31
828	149.3	41.99
829	149.4	88.49
830	149.5	149.85
831	149.6	203.35
832	149.7	230.88
833	149.8	235.68
834	149.9	174.12
835	150	77.87
836	150.1	6.04
837	150.2	0
838	150.3	21.2
839	150.4	63.01
840	150.5	77.29
841	150.6	44.57
842	150.7	0
843	150.9	0
844	151	10.62
845	151.1	53.79
846	151.2	17.6
847	151.3	0
848	151.4	0
849	151.5	1.54
850	151.6	60.22
851	151.7	113.19
852	151.8	143.34
853	151.9	146.08
854	152	120.05
855	152.1	85.58
856	152.2	87.32
857	152.3	168.44
858	152.4	289.51
859	152.5	344.29
860	152.6	275.93
861	152.7	192
862	152.8	242.65
863	152.9	388.51
864	153	377.22
865	153.1	85.62
866	153.2	0
867	153.4	0
868	153.5	151.27
869	153.6	188.41
870	153.7	95.56
871	153.8	60.36
872	153.9	103.39
873	154	153.57
874	154.1	150.2
875	154.2	124.75
876	154.3	113.72
877	154.4	120.45
878	154.5	122.51
879	154.6	154.16
880	154.7	202.18
881	154.8	214.44
882	154.9	173.54
883	155	124.45
884	155.1	101.41
885	155.2	84.94
886	155.3	35.55
887	155.4	0
888	155.5	2.54
889	155.6	73.22
890	155.7	157.92
891	155.8	197.47
892	155.9	175.47
893	156	133.87
894	156.1	121.54
895	156.2	138.33
896	156.3	91.57
897	156.4	0
898	156.7	0
899	156.8	161.76
900	156.9	446.36
901	157	708.46
902	157.1	827.98
903	157.2	731.24
904	157.3	478.18
905	157.4	222.12
906	157.5	88.26
907	157.6	103.16
908	157.7	132.6
909	157.8	63.04
910	157.9	0
911	158.1	0
912	158.2	23.42
913	158.3	121.11
914	158.4	249.39
915	158.5	341.95
916	158.6	293.22
917	158.7	162.32
918	158.8	182.52
919	158.9	476.82
920	159	827.57
921	159.1	883.16
922	159.2	569.87
923	159.3	163.82
924	159.4	0
925	159.5	0
926	159.6	11.01
927	159.7	77.46
928	159.8	68.15
929	159.9	67.33
930	160	134.55
931	160.1	194.88
932	160.2	187.97
933	160.3	107.53
934	160.4	81.69
935	160.5	159.13
936	160.6	268.83
937	160.7	272.41
938	160.8	199.51
939	160.9	206.6
940	161	336.9
941	161.1	426.63
942	161.2	340.21
943	161.3	158.96
944	161.4	44.63
945	161.5	34.43
946	161.6	33.85
947	161.7	58.03
948	161.8	66.59
949	161.9	93.1
950	162	126.31
951	162.1	131.55
952	162.2	98.32
953	162.3	58.78
954	162.4	35.19
955	162.5	31.85
956	162.6	7.52
957	162.7	0
958	162.8	0
959	162.9	82.75
960	163	177.05
961	163.1	158.66
962	163.2	55.08
963	163.3	0
964	163.4	0
965	163.5	0.28
966	163.6	18.97
967	163.7	29.04
968	163.8	39.95
969	163.9	45.61
970	164	45.94
971	164.1	49.39
972	164.2	70.69
973	164.3	108.07
974	164.4	148
975	164.5	187.42
976	164.6	256.13
977	164.7	355.52
978	164.8	423.94
979	164.9	389.06
980	165	257.92
981	165.1	121.17
982	165.2	52.93
983	165.3	42.4
984	165.4	38.28
985	165.5	21.76
986	165.6	0.13
987	165.7	0
988	165.9	0
989	166	63.36
990	166.1	121.09
991	166.2	113.04
992	166.3	34.64
993	166.4	0
994	166.7	0
995	166.8	96.73
996	166.9	176.62
997	167	171.67
998	167.1	107.13
999	167.2	38.33
1000	167.3	0
1001	167.4	0
1002	167.5	27.15
1003	167.6	72.63
1004	167.7	91.46
1005	167.8	71.71
1006	167.9	53.04
1007	168	83.69
1008	168.1	169.76
1009	168.2	237.32
1010	168.3	230.32
1011	168.4	163.77
1012	168.5	96.6
1013	168.6	75.86
1014	168.7	82.59
1015	168.8	79.74
1016	168.9	74.74
1017	169	69.72
1018	169.1	55.88
1019	169.2	24.42
1020	169.3	0
1021	169.4	19.81
1022	169.5	74.32
1023	169.6	102.79
1024	169.7	77.93
1025	169.8	27.19
1026	169.9	7.42
1027	170	35.83
1028	170.1	104.01
1029	170.2	184.32
1030	170.3	232.56
1031	170.4	192.59
1032	170.5	82.28
1033	170.6	0
1034	170.7	0
1035	170.8	115.43
1036	170.9	416.64
1037	171	692.77
1038	171.1	711.42
1039	171.2	445.14
1040	171.3	130.21
1041	171.4	0
1042	171.7	0
1043	171.8	49.34
1044	171.9	89.77
1045	172	104.97
1046	172.1	98.44
1047	172.2	63.03
1048	172.3	1.42
1049	172.4	0
1050	172.6	0
1051	172.7	44.3
1052	172.8	133.72
1053	172.9	224.17
1054	173	295.76
1055	173.1	310.11
1056	173.2	250.89
1057	173.3	152.68
1058	173.4	69.25
1059	173.5	35.88
1060	173.6	35.81
1061	173.7	52.85
1062	173.8	87.86
1063	173.9	128.32
1064	174	148.63
1065	174.1	129.9
1066	174.2	49.24
1067	174.3	0
1068	174.4	0
1069	174.5	32.01
1070	174.6	41.91
1071	174.7	0
1072	175	0
1073	175.1	160.25
1074	175.2	293.42
1075	175.3	198.81
1076	175.4	33.12
1077	175.5	0
1078	176.1	0
1079	176.2	45.03
1080	176.3	87.76
1081	176.4	111.45
1082	176.5	126.53
1083	176.6	155.99
1084	176.7	191.92
1085	176.8	189.58
1086	176.9	112.21
1087	177	0
1088	177.5	0
1089	177.6	68.5
1090	177.7	114.72
1091	177.8	162.48
1092	177.9	191.36
1093	178	180.72
1094	178.1	135.27
1095	178.2	96.98
1096	178.3	119.49
1097	178.4	230.48
1098	178.5	309.69
1099	178.6	235.58
1100	178.7	79.23
1101	178.8	15.77
1102	178.9	66.45
1103	179	70.04
1104	179.1	0
1105	179.4	0
1106	179.5	73.99
1107	179.6	57.72
1108	179.7	29.34
1109	179.8	0
1110	180.5	0
1111	180.6	13.63
1112	180.7	61.5
1113	180.8	89.69
1114	180.9	84.83
1115	181	60.11
1116	181.1	22.34
1117	181.2	0
1118	181.3	6.47
1119	181.4	58.18
1120	181.5	111
1121	181.6	122.31
1122	181.7	91.77
1123	181.8	53.15
1124	181.9	33.77
1125	182	38.49
1126	182.1	63.04
1127	182.2	91.85
1128	182.3	145.88
1129	182.4	217.19
1130	182.5	299.16
1131	182.6	363.87
1132	182.7	377.54
1133	182.8	360.26
1134	182.9	344.64
1135	183	324.89
1136	183.1	274.99
1137	183.2	185.59
1138	183.3	73.16
1139	183.4	5.04
1140	183.5	0
1141	183.6	9.03
1142	183.7	25.6
1143	183.8	0
1144	184.1	0
1145	184.2	103.99
1146	184.3	254.48
1147	184.4	380.77
1148	184.5	429.77
1149	184.6	412.14
1150	184.7	387.98
1151	184.8	378.61
1152	184.9	370.86
1153	185	354.04
1154	185.1	334.9
1155	185.2	296.68
1156	185.3	214.65
1157	185.4	98.76
1158	185.5	21.01
1159	185.6	19.34
1160	185.7	46.28
1161	185.8	10.59
1162	185.9	0
1163	186.4	0
1164	186.5	56.75
1165	186.6	148.16
1166	186.7	241.25
1167	186.8	307.94
1168	186.9	308.42
1169	187	254.28
1170	187.1	190
1171	187.2	138.28
1172	187.3	82.48
1173	187.4	30.47
1174	187.5	18.69
1175	187.6	42.98
1176	187.7	77.49
1177	187.8	76.28
1178	187.9	26.65
1179	188	0
1180	188.1	0
1181	188.2	88.64
1182	188.3	189.1
1183	188.4	214.6
1184	188.5	153.69
1185	188.6	86.59
1186	188.7	91.68
1187	188.8	120.74
1188	188.9	78.27
1189	189	0
1190	189.2	0
1191	189.3	73.64
1192	189.4	87.61
1193	189.5	8.32
1194	189.6	0
1195	190	0
1196	190.1	6.62
1197	190.2	70.16
1198	190.3	149.42
1199	190.4	168.81
1200	190.5	115.09
1201	190.6	47.89
1202	190.7	31.02
1203	190.8	24.57
1204	190.9	0
1205	191	0
1206	191.1	47.58
1207	191.2	182.44
1208	191.3	287.49
1209	191.4	231.39
1210	191.5	75.09
1211	191.6	0
1212	191.7	0
1213	191.8	5
1214	191.9	68.2
1215	192	123.98
1216	192.1	146.73
1217	192.2	111.61
1218	192.3	21.65
1219	192.4	0
1220	192.8	0
1221	192.9	9.88
1222	193	82.4
1223	193.1	139.85
1224	193.2	153.46
1225	193.3	172.42
1226	193.4	256.56
1227	193.5	410.13
1228	193.6	553.89
1229	193.7	613.37
1230	193.8	574.35
1231	193.9	489.73
1232	194	431.45
1233	194.1	407.95
1234	194.2	349.6
1235	194.3	213.23
1236	194.4	45.26
1237	194.5	0
1238	194.7	0
1239	194.8	87.7
1240	194.9	352.7
1241	195	503.66
1242	195.1	418.87
1243	195.2	173.11
1244	195.3	0
1245	195.6	0
1246	195.7	44.78
1247	195.8	60.33
1248	195.9	53.46
1249	196	34.31
1250	196.1	17.52
1251	196.2	20.53
1252	196.3	47.7
1253	196.4	97.46
1254	196.5	162.21
1255	196.6	222.99
1256	196.7	260.05
1257	196.8	257.46
1258	196.9	214.18
1259	197	154.23
1260	197.1	113.19
1261	197.2	87.49
1262	197.3	75.67
1263	197.4	51.72
1264	197.5	42.91
1265	197.6	45.77
1266	197.7	68.03
1267	197.8	108.34
1268	197.9	159.59
1269	198	172.26
1270	198.1	105.63
1271	198.2	0
1272	198.4	0
1273	198.5	80.58
1274	198.6	198.84
1275	198.7	202.27
1276	198.8	115.76
1277	198.9	11.18
1278	199	0
1279	199.1	0
1280	199.2	30.43
1281	199.3	119.68
1282	199.4	223.26
1283	199.5	307.43
1284	199.6	347.27
1285	199.7	309.74
1286	199.8	229.02
1287	199.9	149.19
1288	200	84.94
1289	200.1	31.15
1290	200.2	0
1291	201	0
1292	201.1	35.42
1293	201.2	182.35
1294	201.3	236.03
1295	201.4	234.92
1296	201.5	219.82
1297	201.6	215.66
1298	201.7	201.5
1299	201.8	149.8
1300	201.9	106.25
1301	202	119.65
1302	202.1	175.97
1303	202.2	209.43
1304	202.3	163.57
1305	202.4	70.75
1306	202.5	33.38
1307	202.6	91.48
1308	202.7	172.44
1309	202.8	188.2
1310	202.9	140.54
1311	203	85.65
1312	203.1	57.19
1313	203.2	47.7
1314	203.3	63.45
1315	203.4	90.33
1316	203.5	105.88
1317	203.6	74.61
1318	203.7	27.38
1319	203.8	9.63
1320	203.9	0
1321	204.2	0
1322	204.3	47.89
1323	204.4	124.67
1324	204.5	163.81
1325	204.6	179.11
1326	204.7	173.03
1327	204.8	120.48
1328	204.9	49.35
1329	205	9.47
1330	205.1	0
1331	205.5	0
1332	205.6	2.63
1333	205.7	76.98
1334	205.8	125.37
1335	205.9	131.35
1336	206	121.75
1337	206.1	105.35
1338	206.2	102.7
1339	206.3	119.37
1340	206.4	104.81
1341	206.5	21.34
1342	206.6	0
1343	207.6	0
1344	207.7	1.65
1345	207.8	0
1346	209.6	0
1347	209.7	35.21
1348	209.8	61.17
1349	209.9	72.05
1350	210	61.53
1351	210.1	33.5
1352	210.2	0
1353	210.3	0
1354	210.4	9.3
1355	210.5	72
1356	210.6	136.18
1357	210.7	171.31
1358	210.8	191.91
1359	210.9	217.04
1360	211	230.48
1361	211.1	190.66
1362	211.2	104.82
1363	211.3	25.13
1364	211.4	0
1365	211.6	0
1366	211.7	9.89
1367	211.8	15.28
1368	211.9	19.14
1369	212	28.93
1370	212.1	46.55
1371	212.2	65.6
1372	212.3	76.17
1373	212.4	76.66
1374	212.5	77.08
1375	212.6	93.61
1376	212.7	109.51
1377	212.8	89.77
1378	212.9	21.68
1379	213	0
1380	213.4	0
1381	213.5	0.81
1382	213.6	34.33
1383	213.7	98.62
1384	213.8	148.09
1385	213.9	146.71
1386	214	109.6
1387	214.1	73.84
1388	214.2	65.85
1389	214.3	90.07
1390	214.4	154.49
1391	214.5	224.41
1392	214.6	252.28
1393	214.7	206.8
1394	214.8	98.64
1395	214.9	0
1396	215.1	0
1397	215.2	68.91
1398	215.3	125.26
1399	215.4	121.24
1400	215.5	99.79
1401	215.6	115.91
1402	215.7	140.51
1403	215.8	134.96
1404	215.9	91.65
1405	216	44.21
1406	216.1	24.33
1407	216.2	28.04
1408	216.3	38.91
1409	216.4	54.12
1410	216.5	59.35
1411	216.6	61.58
1412	216.7	93.35
1413	216.8	144.03
1414	216.9	163.26
1415	217	118.7
1416	217.1	29.63
1417	217.2	0
1418	218.3	0
1419	218.4	27.8
1420	218.5	97.46
1421	218.6	197.71
1422	218.7	295.89
1423	218.8	310.21
1424	218.9	246.78
1425	219	180.9
1426	219.1	143.21
1427	219.2	83.05
1428	219.3	0
1429	219.5	0
1430	219.6	58.39
1431	219.7	102.6
1432	219.8	118.61
1433	219.9	132.99
1434	220	151.89
1435	220.1	159.19
1436	220.2	135.84
1437	220.3	64.91
1438	220.4	0
1439	220.7	0
1440	220.8	325.35
1441	220.9	547.59
1442	221	469.86
1443	221.1	233.39
1444	221.2	36.55
1445	221.3	0
1446	221.6	0
1447	221.7	15.44
1448	221.8	23.62
1449	221.9	0
1450	223	0
1451	223.1	17.42
1452	223.2	454.85
1453	223.3	551.61
1454	223.4	474.48
1455	223.5	380.38
1456	223.6	247.73
1457	223.7	62.85
1458	223.8	0
1459	224	0
1460	224.1	40.42
1461	224.2	85
1462	224.3	137.38
1463	224.4	116.9
1464	224.5	33.55
1465	224.6	8.3
1466	224.7	25.27
1467	224.8	23.86
1468	224.9	0
1469	225.8	0
1470	225.9	71.81
1471	226	112.35
1472	226.1	68.98
1473	226.2	3.38
1474	226.3	0
1475	226.6	0
1476	226.7	59.81
1477	226.8	145.52
1478	226.9	191.51
1479	227	177.37
1480	227.1	135.7
1481	227.2	103.77
1482	227.3	90.05
1483	227.4	85.15
1484	227.5	63.95
1485	227.6	29.95
1486	227.7	0.43
1487	227.8	0
1488	227.9	0
1489	228	5.89
1490	228.1	11.3
1491	228.2	6.92
1492	228.3	3.54
1493	228.4	8.88
1494	228.5	13.28
1495	228.6	0
1496	228.9	0
1497	229	43.85
1498	229.1	78.84
1499	229.2	65.55
1500	229.3	36.62
1501	229.4	25.24
1502	229.5	33.87
1503	229.6	51.65
1504	229.7	49.24
1505	229.8	11.35
1506	229.9	0
1507	230.3	0
1508	230.4	10.38
1509	230.5	122.02
1510	230.6	237.28
1511	230.7	254.26
1512	230.8	214.25
1513	230.9	196.62
1514	231	216.73
1515	231.1	227.31
1516	231.2	201.06
1517	231.3	166.2
1518	231.4	122.74
1519	231.5	93.51
1520	231.6	94
1521	231.7	98.14
1522	231.8	81.03
1523	231.9	27.92
1524	232	0
1525	232.1	0
1526	232.2	12.55
1527	232.3	93.4
1528	232.4	142.16
1529	232.5	124.72
1530	232.6	46.4
1531	232.7	0
1532	233.9	0
1533	234	2.56
1534	234.1	0.27
1535	234.2	0
1536	234.4	0
1537	234.5	39.6
1538	234.6	117.04
1539	234.7	181.6
1540	234.8	195.39
1541	234.9	142.92
1542	235	59.24
1543	235.1	16.82
1544	235.2	37.33
1545	235.3	61.75
1546	235.4	48.82
1547	235.5	14.87
1548	235.6	0
1549	235.9	0
1550	236	18.93
1551	236.1	22.14
1552	236.2	15.13
1553	236.3	28.15
1554	236.4	48.79
1555	236.5	108.19
1556	236.6	175.31
1557	236.7	212.45
1558	236.8	240.72
1559	236.9	299.18
1560	237	375.13
1561	237.1	385.09
1562	237.2	292.68
1563	237.3	150.97
1564	237.4	51.63
1565	237.5	4.53
1566	237.6	0
1567	237.7	0
1568	237.8	7.62
1569	237.9	23.04
1570	238	29.94
1571	238.1	32.56
1572	238.2	42.79
1573	238.3	62.03
1574	238.4	91.5
1575	238.5	145.3
1576	238.6	255.62
1577	238.7	406.91
1578	238.8	530.99
1579	238.9	589.09
1580	239	586.48
1581	239.1	533.79
1582	239.2	416.88
1583	239.3	250.55
1584	239.4	100.59
1585	239.5	19.54
1586	239.6	17.85
1587	239.7	29.93
1588	239.8	28.07
1589	239.9	15.69
1590	240	4.86
1591	240.1	3.55
1592	240.2	10.84
1593	240.3	23.54
1594	240.4	55.2
1595	240.5	118.9
1596	240.6	186.71
1597	240.7	206.6
1598	240.8	154.94
1599	240.9	89.82
1600	241	68.72
1601	241.1	87
1602	241.2	92.73
1603	241.3	64.77
1604	241.4	27.41
1605	241.5	8.59
1606	241.6	3.19
1607	241.7	0.51
1608	241.8	0
1609	242	0
1610	242.1	3.5
1611	242.2	11.34
1612	242.3	23.36
1613	242.4	40.68
1614	242.5	55.18
1615	242.6	52.75
1616	242.7	27.73
1617	242.8	0
1618	243.2	0
1619	243.3	2.13
1620	243.4	2.98
1621	243.5	0.4
1622	243.6	0
1623	243.7	0.58
1624	243.8	5.14
1625	243.9	17.12
1626	244	32.35
1627	244.1	36.46
1628	244.2	18.98
1629	244.3	0
1630	244.5	0
1631	244.6	57.23
1632	244.7	105.13
1633	244.8	114.46
1634	244.9	99.52
1635	245	81.47
1636	245.1	57.58
1637	245.2	14.55
1638	245.3	0
1639	245.5	0
1640	245.6	14.02
1641	245.7	29.38
1642	245.8	36.86
1643	245.9	39.24
1644	246	37.98
1645	246.1	31.47
1646	246.2	19.1
1647	246.3	6.1
1648	246.4	0.28
1649	246.5	4.45
1650	246.6	13.01
1651	246.7	14.43
1652	246.8	0.23
1653	246.9	0
1654	247	0
1655	247.1	42.58
1656	247.2	102.06
1657	247.3	104
1658	247.4	38.8
1659	247.5	0
1660	248.1	0
1661	248.2	15.29
1662	248.3	66.99
1663	248.4	79.98
1664	248.5	75.93
1665	248.6	74.29
1666	248.7	37.35
1667	248.8	0
1668	249.1	0
1669	249.2	0.89
1670	249.3	14.51
1671	249.4	28.49
1672	249.5	36.29
1673	249.6	32.42
1674	249.7	27.63
1675	249.8	26.79
1676	249.9	21.39
1677	250	7.81
1678	250.1	0
1679	250.2	41.48
1680	250.3	121.48
1681	250.4	186.33
1682	250.5	189.5
1683	250.6	138.17
1684	250.7	82.26
1685	250.8	53.83
1686	250.9	46.67
1687	251	41.23
1688	251.1	31.74
1689	251.2	20.51
1690	251.3	12.16
1691	251.4	10.66
1692	251.5	16.5
1693	251.6	19.47
1694	251.7	8.65
1695	251.8	0
1696	251.9	7.98
1697	252	52.11
1698	252.1	95.17
1699	252.2	105.36
1700	252.3	75.38
1701	252.4	32.11
1702	252.5	16.55
1703	252.6	36.44
1704	252.7	78.02
1705	252.8	123.2
1706	252.9	192.84
1707	253	279.2
1708	253.1	314.44
1709	253.2	243.03
1710	253.3	110.67
1711	253.4	14.24
1712	253.5	0
1713	253.6	0
1714	253.7	20.48
1715	253.8	30.38
1716	253.9	25.67
1717	254	15.8
1718	254.1	5.9
1719	254.2	0.85
1720	254.3	11.81
1721	254.4	42.38
1722	254.5	70.1
1723	254.6	65.46
1724	254.7	27.39
1725	254.8	0
1726	255	0
1727	255.1	2.6
1728	255.2	18.94
1729	255.3	23.35
1730	255.4	14.42
1731	255.5	4.06
1732	255.6	0
1733	255.7	0
1734	255.8	2.59
1735	255.9	3.81
1736	256	2.37
1737	256.1	0
1738	256.2	2.32
1739	256.3	24.41
1740	256.4	70.34
1741	256.5	114.17
1742	256.6	140.82
1743	256.7	139.49
1744	256.8	112.2
1745	256.9	73.82
1746	257	42.94
1747	257.1	29.76
1748	257.2	27.43
1749	257.3	17.39
1750	257.4	11.53
1751	257.5	7.58
1752	257.6	3.65
1753	257.7	0
1754	258.1	0
1755	258.2	4.07
1756	258.3	9.85
1757	258.4	13.46
1758	258.5	13.72
1759	258.6	6.83
1760	258.7	0
1761	259.1	0
1762	259.2	4.18
1763	259.3	10.2
1764	259.4	9.55
1765	259.5	14.48
1766	259.6	24.62
1767	259.7	32.65
1768	259.8	37.18
1769	259.9	42.27
1770	260	46.46
1771	260.1	41.27
1772	260.2	24.24
1773	260.3	6.63
1774	260.4	4.13
1775	260.5	18.77
1776	260.6	42.47
1777	260.7	63.84
1778	260.8	76.52
1779	260.9	78.77
1780	261	72.88
1781	261.1	64.75
1782	261.2	55.57
1783	261.3	38.37
1784	261.4	12.15
1785	261.5	0
1786	261.8	0
1787	261.9	1.48
1788	262	12.16
1789	262.1	23.15
1790	262.2	24.56
1791	262.3	27.2
1792	262.4	41.06
1793	262.5	69.45
1794	262.6	119.99
1795	262.7	186.11
1796	262.8	226.95
1797	262.9	213.79
1798	263	164.98
1799	263.1	114.86
1800	263.2	72.07
1801	263.3	26.47
1802	263.4	0
1803	263.7	0
1804	263.8	1.03
1805	263.9	5.59
1806	264	5.91
1807	264.1	2.07
1808	264.2	0
1809	264.3	1.9
1810	264.4	16.41
1811	264.5	31.7
1812	264.6	34.94
1813	264.7	24.53
1814	264.8	9.53
1815	264.9	0
1816	265.3	0
1817	265.4	2.28
1818	265.5	15.96
1819	265.6	25.67
1820	265.7	37.34
1821	265.8	50.97
1822	265.9	55.14
1823	266	39.79
1824	266.1	11.75
1825	266.2	0
1826	266.4	0
1827	266.5	33.06
1828	266.6	77.07
1829	266.7	106.88
1830	266.8	115.99
1831	266.9	122.3
1832	267	130.43
1833	267.1	115.66
1834	267.2	61.12
1835	267.3	3.94
1836	267.4	0
1837	267.5	0
1838	267.6	4.41
1839	267.7	9.92
1840	267.8	7.96
1841	267.9	4.04
1842	268	3.55
1843	268.1	7.97
1844	268.2	13.97
1845	268.3	19.25
1846	268.4	22.94
1847	268.5	20.5
1848	268.6	9.59
1849	268.7	2.42
1850	268.8	16.42
1851	268.9	58.11
1852	269	101.3
1853	269.1	108.04
1854	269.2	62.46
1855	269.3	0
1856	269.5	0
1857	269.6	20.94
1858	269.7	87.73
1859	269.8	95.45
1860	269.9	56.1
1861	270	18.45
1862	270.1	5.68
1863	270.2	1.45
1864	270.3	3.39
1865	270.4	5.98
1866	270.5	8.77
1867	270.6	0
1868	271.7	0
1869	271.8	14.55
1870	271.9	11.25
1871	272	0
1872	272.3	0
1873	272.4	8.8
1874	272.5	17.15
1875	272.6	6.23
1876	272.7	0
1877	272.8	0
1878	272.9	4.77
1879	273	9.83
1880	273.1	4.74
1881	273.2	0
1882	273.3	1.13
1883	273.4	7.72
1884	273.5	9.02
1885	273.6	2.09
1886	273.7	0
1887	273.8	0.56
1888	273.9	10.99
1889	274	15.56
1890	274.1	12.83
1891	274.2	0
1892	274.5	0
1893	274.6	5.21
1894	274.7	48.13
1895	274.8	71.52
1896	274.9	67.59
1897	275	45.62
1898	275.1	22.9
1899	275.2	1.2
1900	275.3	0
1901	275.4	0
1902	275.5	3.7
1903	275.6	21.91
1904	275.7	22.16
1905	275.8	2.63
1906	275.9	0
1907	276.2	0
1908	276.3	7.32
1909	276.4	39.58
1910	276.5	52.79
1911	276.6	39.35
1912	276.7	6.94
1913	276.8	0
1914	276.9	0
1915	277	6.9
1916	277.1	33.92
1917	277.2	38.26
1918	277.3	20.74
1919	277.4	2.54
1920	277.5	0
1921	277.6	4.75
1922	277.7	11.43
1923	277.8	18.16
1924	277.9	27.07
1925	278	34.41
1926	278.1	32.77
1927	278.2	21.97
1928	278.3	11
1929	278.4	7.54
1930	278.5	13.45
1931	278.6	27.47
1932	278.7	49.88
1933	278.8	69.61
1934	278.9	72.91
1935	279	57.4
1936	279.1	33.7
1937	279.2	13.53
1938	279.3	2.58
1939	279.4	0
1940	279.5	0
1941	279.6	1.14
1942	279.7	3.81
1943	279.8	5.42
1944	279.9	4.77
1945	280	7.24
1946	280.1	10.24
1947	280.2	8.07
1948	280.3	0
1949	281	0
1950	281.1	148.46
1951	281.2	117.28
1952	281.3	38.74
1953	281.4	42.85
1954	281.5	103.17
1955	281.6	104.58
1956	281.7	0
1957	282.2	0
1958	282.3	35.55
1959	282.4	23.93
1960	282.5	34.66
1961	282.6	92.38
1962	282.7	165.32
1963	282.8	226.07
1964	282.9	251.65
1965	283	229.08
1966	283.1	166.41
1967	283.2	105.18
1968	283.3	74.37
1969	283.4	62.07
1970	283.5	61.99
1971	283.6	75.02
1972	283.7	71.43
1973	283.8	71.57
1974	283.9	94.29
1975	284	121.06
1976	284.1	116.9
1977	284.2	77.61
1978	284.3	37.02
1979	284.4	9.89
1980	284.5	0
1981	284.6	0
1982	284.7	0.36
1983	284.8	17.93
1984	284.9	37.63
1985	285	49
1986	285.1	48.13
1987	285.2	39.92
1988	285.3	30.42
1989	285.4	19.73
1990	285.5	5.88
1991	285.6	0
1992	285.7	0
1993	285.8	4.93
1994	285.9	20.04
1995	286	27.89
1996	286.1	25.67
1997	286.2	18.22
[truncated: 2,695 more rows]

## Sheet: Sheet2
+ESI Scan (rt: 0.89-1.11 min, 48 scans) Frag=100.0V CF=0.000 DF=0.000 4608-01.d Subtract
Index	X	Y
0	50	0
1	50.4	0
2	50.5	0.46
3	50.6	0.61
4	50.7	0.35
5	50.8	0.09
6	50.9	0.25
7	51	0.7
8	51.1	0.86
9	51.2	0.4
10	51.3	0
11	51.6	0
12	51.7	0.05
13	51.8	0.44
14	51.9	0.42
15	52	0.2
16	52.1	0
17	53.3	0
18	53.4	0.39
19	53.5	0.86
20	53.6	0.82
21	53.7	0.73
22	53.8	0.48
23	53.9	0
24	54.2	0
25	54.3	0.5
26	54.4	4.03
27	54.5	9.87
28	54.6	17.29
29	54.7	27.56
30	54.8	39.27
31	54.9	5.39
32	55	0
33	55.2	0
34	55.3	31.23
35	55.4	120.67
36	55.5	97.07
37	55.6	27.12
38	55.7	4.28
39	55.8	0
40	56.1	0
41	56.2	7.22
42	56.3	25.68
43	56.4	37.07
44	56.5	26.31
45	56.6	8.15
46	56.7	0
47	57	0
48	57.1	57.3
49	57.2	163.74
50	57.3	167
51	57.4	37.63
52	57.5	0
53	57.8	0
54	57.9	17.7
55	58	36.27
56	58.1	35.17
57	58.2	24.54
58	58.3	0
59	58.6	0
60	58.7	270.61
61	58.8	530.29
62	58.9	555.14
63	59	714.18
64	59.1	1432.57
65	59.2	2329.6
66	59.3	2449.31
67	59.4	1492.01
68	59.5	238.97
69	59.6	0
70	60.3	0
71	60.4	56.15
72	60.5	93.19
73	60.6	167.35
74	60.7	125.44
75	60.8	0
76	60.9	0
77	61	76.52
78	61.1	460.88
79	61.2	512.06
80	61.3	0
81	61.7	0
82	61.8	3.1
83	61.9	11.52
84	62	9.86
85	62.1	0
86	62.7	0
87	62.8	23.66
88	62.9	52.83
89	63	66.42
90	63.1	61.13
91	63.2	46.32
92	63.3	31.68
93	63.4	20.35
94	63.5	19.81
95	63.6	30.28
96	63.7	35.43
97	63.8	0
98	65.7	0
99	65.8	5.79
100	65.9	3.63
101	66	1.25
102	66.1	0.41
103	66.2	0
104	66.9	0
105	67	0.52
106	67.1	5.11
107	67.2	5.27
108	67.3	2.92
109	67.4	0.4
110	67.5	0
111	67.6	0
112	67.7	0.56
113	67.8	1.64
114	67.9	1.43
115	68	0.01
116	68.1	0
117	68.2	0.31
118	68.3	1.4
119	68.4	0
120	68.9	0
121	69	7.84
122	69.1	34.31
123	69.2	56.57
124	69.3	63.25
125	69.4	50.73
126	69.5	25.85
127	69.6	0
128	70.4	0
129	70.5	62.75
130	70.6	107.06
131	70.7	84.28
132	70.8	0
133	71.5	0
134	71.6	19.78
135	71.7	11
136	71.8	0
137	71.9	0
138	72	12.27
139	72.1	67.99
140	72.2	135.93
141	72.3	230.89
142	72.4	329.81
143	72.5	314.94
144	72.6	0
145	73.2	0
146	73.3	291.55
147	73.4	1506.48
148	73.5	1705.82
149	73.6	969.06
150	73.7	156.55
151	73.8	0
152	75.2	0
153	75.3	6
154	75.4	34.25
155	75.5	31.95
156	75.6	23.06
157	75.7	11.45
158	75.8	2.76
159	75.9	3.46
160	76	14.18
161	76.1	24.09
162	76.2	29.15
163	76.3	28.38
164	76.4	23.38
165	76.5	28.26
166	76.6	20.93
167	76.7	0
168	77	0
169	77.1	115.9
170	77.2	179.28
171	77.3	165.03
172	77.4	126.18
173	77.5	98.8
174	77.6	85.75
175	77.7	72.86
176	77.8	88.91
177	77.9	181.62
178	78	290.8
179	78.1	227.41
180	78.2	0
181	78.5	0
182	78.6	567.19
183	78.7	1386.1
184	78.8	2340.29
185	78.9	3320.23
186	79	4033.44
187	79.1	4251.85
188	79.2	3988.57
189	79.3	3337.75
190	79.4	2380.6
191	79.5	1307.23
192	79.6	481.93
193	79.7	61.61
194	79.8	57.48
195	79.9	128.06
196	80	157.58
197	80.1	144.25
198	80.2	80.42
199	80.3	0
200	82.3	0
201	82.4	3.52
202	82.5	19.49
203	82.6	4.1
204	82.7	32.76
205	82.8	132.02
206	82.9	229.67
207	83	240.61
208	83.1	154.87
209	83.2	43.7
210	83.3	0
211	83.4	0
212	83.5	0.21
213	83.6	0
214	84.4	0
215	84.5	51.23
216	84.6	59.66
217	84.7	45.64
218	84.8	74.54
219	84.9	72.85
220	85	13.9
221	85.1	0
222	85.2	54.72
223	85.3	148.76
224	85.4	172.78
225	85.5	98.55
226	85.6	19.24
227	85.7	0
228	86.5	0
229	86.6	15.24
230	86.7	84.57
231	86.8	164.71
232	86.9	219.81
233	87	218.76
234	87.1	187.99
235	87.2	197.33
236	87.3	258.45
237	87.4	303.14
238	87.5	279.76
239	87.6	217.18
240	87.7	159.16
241	87.8	143.44
242	87.9	177.98
243	88	225.36
244	88.1	214.27
245	88.2	85.26
246	88.3	0
247	88.4	2.95
248	88.5	335.57
249	88.6	469.61
250	88.7	238.04
251	88.8	0
252	89	0
253	89.1	324.35
254	89.2	1252.85
255	89.3	1719.97
256	89.4	972.38
257	89.5	0
258	89.8	0
259	89.9	53.61
260	90	0
261	90.1	0
262	90.2	246.67
263	90.3	564.91
264	90.4	621.25
265	90.5	371.2
266	90.6	71.02
267	90.7	0
268	91.6	0
269	91.7	3.86
270	91.8	22.89
271	91.9	49.24
272	92	63.68
273	92.1	78.47
274	92.2	78.9
275	92.3	59.01
276	92.4	32.53
277	92.5	15.71
278	92.6	8.04
279	92.7	0
280	93.3	0
281	93.4	6.4
282	93.5	6.29
283	93.6	3.72
284	93.7	0
285	94	0
286	94.1	2.51
287	94.2	12.44
288	94.3	20.13
289	94.4	20.81
290	94.5	12.05
291	94.6	0
292	96.8	0
293	96.9	23.58
294	97	61.58
295	97.1	13.51
296	97.2	0
297	97.4	0
298	97.5	99.69
299	97.6	215.89
300	97.7	221.1
301	97.8	236.31
302	97.9	351.97
303	98	563.54
304	98.1	714.71
305	98.2	612.06
306	98.3	269.82
307	98.4	22.84
308	98.5	200.61
309	98.6	964
310	98.7	1929.82
311	98.8	2703.79
312	98.9	3177.53
313	99	3478.13
314	99.1	3736.72
315	99.2	3843.7
316	99.3	3446
317	99.4	2388.74
318	99.5	1086.19
319	99.6	254.46
320	99.7	18.56
321	99.8	0
322	100.1	0
323	100.2	158.19
324	100.3	537.26
325	100.4	1300.39
326	100.5	3083.57
327	100.6	6297.05
328	100.7	10900.7
329	100.8	15809.1
330	100.9	19452.6
331	101	20919.9
332	101.1	20392.4
333	101.2	18380
334	101.3	15005.6
335	101.4	10426.2
336	101.5	5581.3
337	101.6	1939.83
338	101.7	423.08
339	101.8	677.73
340	101.9	1430.39
341	102	1624.82
342	102.1	1190.33
343	102.2	673.99
344	102.3	427.31
345	102.4	403.94
346	102.5	468.38
347	102.6	567.81
348	102.7	691.49
349	102.8	840.38
350	102.9	1000.59
351	103	1101.98
352	103.1	1115.51
353	103.2	1083.97
354	103.3	982.57
355	103.4	722.61
356	103.5	359.52
357	103.6	91.25
358	103.7	47.78
359	103.8	20.3
360	103.9	0
361	104.1	0
362	104.2	24.94
363	104.3	49.74
364	104.4	26.05
365	104.5	0
366	105.1	0
367	105.2	14.58
368	105.3	0
369	105.4	0
370	105.5	113.03
371	105.6	196
372	105.7	112.05
373	105.8	0
374	106.1	0
375	106.2	165.67
376	106.3	193.77
377	106.4	142.45
378	106.5	135.12
379	106.6	219.99
380	106.7	348.2
381	106.8	310.25
382	106.9	81.49
383	107	0
384	107.2	0
385	107.3	85.3
386	107.4	169.02
387	107.5	174.34
388	107.6	171.31
389	107.7	183.81
390	107.8	233.66
391	107.9	263.8
392	108	191.12
393	108.1	21.29
394	108.2	0
395	108.4	0
396	108.5	23.32
397	108.6	6.92
398	108.7	0
399	109.6	0
400	109.7	8.98
401	109.8	36.46
402	109.9	15.35
403	110	0
404	110.1	9.6
405	110.2	14.92
406	110.3	0
407	111.5	0
408	111.6	94.34
409	111.7	176.54
410	111.8	268.35
411	111.9	296.31
412	112	242.13
413	112.1	144.6
414	112.2	45.92
415	112.3	0
416	112.9	0
417	113	21.87
418	113.1	66.2
419	113.2	0
420	113.6	0
421	113.7	55.39
422	113.8	95.09
423	113.9	125.12
424	114	201.04
425	114.1	268.11
426	114.2	221.77
427	114.3	84.22
428	114.4	0
429	114.5	0
430	114.6	89.86
431	114.7	40.18
432	114.8	0
433	115	0
434	115.1	95.37
435	115.2	810.39
436	115.3	1145.57
437	115.4	875.61
438	115.5	268
439	115.6	0
440	116	0
441	116.1	73.92
442	116.2	206.01
443	116.3	312.88
444	116.4	322.55
445	116.5	209.09
446	116.6	79.4
447	116.7	38.09
448	116.8	118.41
449	116.9	200.92
450	117	156.56
451	117.1	5.12
452	117.2	0
453	117.3	0
454	117.4	80.25
455	117.5	145.44
456	117.6	109.66
457	117.7	18.08
458	117.8	0
459	118.2	0
460	118.3	105.02
461	118.4	39.95
462	118.5	0
463	118.6	40.55
464	118.7	187.44
465	118.8	301.35
466	118.9	373.03
467	119	473.26
468	119.1	542.59
469	119.2	435.73
470	119.3	187.74
471	119.4	3.86
472	119.5	4.86
473	119.6	58.51
474	119.7	53.47
475	119.8	39.98
476	119.9	54.36
477	120	22.57
478	120.1	0
479	121.4	0
480	121.5	94.4
481	121.6	166.36
482	121.7	145.17
483	121.8	171.23
484	121.9	198.67
485	122	144.55
486	122.1	51.6
487	122.2	17.55
488	122.3	29.4
489	122.4	36.44
490	122.5	0
491	122.7	0
492	122.8	38.23
493	122.9	152.74
494	123	170.67
495	123.1	84.89
496	123.2	0
497	126.5	0
498	126.6	100.35
499	126.7	340.35
500	126.8	556.7
501	126.9	568.83
502	127	364.42
503	127.1	172.04
504	127.2	139.64
505	127.3	158.94
506	127.4	82.7
507	127.5	0
508	128.5	0
509	128.6	24.92
510	128.7	0
511	129.7	0
512	129.8	47.9
513	129.9	105.68
514	130	85.49
515	130.1	0
516	130.5	0
517	130.6	22.21
518	130.7	179.54
519	130.8	5.56
520	130.9	0
521	131.2	0
522	131.3	172.98
523	131.4	402.62
524	131.5	348.16
525	131.6	151.21
526	131.7	0
527	131.9	0
528	132	101.86
529	132.1	274.13
530	132.2	228.82
531	132.3	54.04
532	132.4	0
533	132.6	0
534	132.7	5.76
535	132.8	107.02
536	132.9	98.79
537	133	50.58
538	133.1	81.69
539	133.2	180.17
540	133.3	220.23
541	133.4	106.8
542	133.5	0
543	133.8	0
544	133.9	156
545	134	323.48
546	134.1	275.84
547	134.2	145.26
548	134.3	0
549	134.6	0
550	134.7	10.92
551	134.8	170.74
552	134.9	225.06
553	135	127.84
554	135.1	0
555	135.3	0
556	135.4	41.39
557	135.5	60.05
558	135.6	33.65
559	135.7	22.8
560	135.8	0
561	136.1	0
562	136.2	51.67
563	136.3	57.94
564	136.4	66.8
565	136.5	176.55
566	136.6	227.58
567	136.7	15.05
568	136.8	0
569	137.1	0
570	137.2	364.91
571	137.3	552.05
572	137.4	448.45
573	137.5	267.31
574	137.6	120.6
575	137.7	36.47
576	137.8	0
577	137.9	0
578	138	73.05
579	138.1	284.91
580	138.2	358.72
581	138.3	280.19
582	138.4	157.92
583	138.5	152.58
584	138.6	289.63
585	138.7	430.26
586	138.8	461.83
587	138.9	383.96
588	139	287.98
589	139.1	243.65
590	139.2	241.48
591	139.3	204.41
592	139.4	103.14
593	139.5	0
594	139.7	0
595	139.8	115.01
596	139.9	175.9
597	140	121.92
598	140.1	0
599	141.9	0
600	142	126.41
601	142.1	65.36
602	142.2	0
603	143.4	0
604	143.5	2.2
605	143.6	110.39
606	143.7	156.4
607	143.8	170.02
608	143.9	161.5
609	144	166.75
610	144.1	171.33
611	144.2	151.53
612	144.3	83.82
613	144.4	0
614	144.6	0
615	144.7	279.34
616	144.8	688.7
617	144.9	989.66
618	145	1032.98
619	145.1	835.6
620	145.2	529.71
621	145.3	265.8
622	145.4	135.53
623	145.5	144.27
624	145.6	210.89
625	145.7	305.23
626	145.8	350.08
627	145.9	317.11
628	146	256.05
629	146.1	200.96
630	146.2	138.95
631	146.3	93.63
632	146.4	81.81
633	146.5	67.4
634	146.6	10.16
635	146.7	0
636	146.8	121.21
637	146.9	317.76
638	147	371.32
639	147.1	209.81
640	147.2	0
641	147.6	0
642	147.7	74.94
643	147.8	149.23
644	147.9	167.54
645	148	151.45
646	148.1	89.54
647	148.2	11.57
648	148.3	0
649	148.4	0
650	148.5	51
651	148.6	26.46
652	148.7	0
653	149	0
654	149.1	9.12
655	149.2	112.12
656	149.3	159.24
657	149.4	150.88
658	149.5	118.3
659	149.6	91.03
660	149.7	84.43
661	149.8	67.85
662	149.9	9.98
663	150	0
664	150.2	0
665	150.3	39.93
666	150.4	43.33
667	150.5	3.1
668	150.6	0
669	150.8	0
670	150.9	84.35
671	151	154.64
672	151.1	169.58
673	151.2	127.19
674	151.3	39.81
675	151.4	0
676	151.7	0
677	151.8	39.49
678	151.9	48.91
679	152	0
680	152.3	0
681	152.4	34.75
682	152.5	0
683	152.6	0
684	152.7	69.55
685	152.8	380.31
686	152.9	659
687	153	738.17
688	153.1	652.94
689	153.2	504.17
690	153.3	318.75
691	153.4	108.71
692	153.5	0
693	154.2	0
694	154.3	88.99
695	154.4	121.33
696	154.5	26.45
697	154.6	0
698	154.8	0
699	154.9	8.49
700	155	117.04
701	155.1	227.74
702	155.2	232.5
703	155.3	97.53
704	155.4	0
705	156	0
706	156.1	79.7
707	156.2	151.02
708	156.3	267.63
709	156.4	482.79
710	156.5	644.46
711	156.6	608.18
712	156.7	532.93
713	156.8	697.87
714	156.9	1052.85
715	157	1244.81
716	157.1	1084.03
717	157.2	728.68
718	157.3	396.3
719	157.4	135.31
720	157.5	0
721	157.7	0
722	157.8	120.27
723	157.9	186.75
724	158	132.81
725	158.1	38.78
726	158.2	0
727	158.4	0
728	158.5	62.99
729	158.6	105.23
730	158.7	21.24
731	158.8	0
732	159.2	0
733	159.3	109.74
734	159.4	139.17
735	159.5	110.32
736	159.6	64.27
737	159.7	42.67
738	159.8	59.03
739	159.9	43.03
740	160	0
741	160.5	0
742	160.6	117.54
743	160.7	257.82
744	160.8	244.29
745	160.9	29.04
746	161	0
747	161.6	0
748	161.7	101.76
749	161.8	184.44
750	161.9	172.17
751	162	129.53
752	162.1	98.58
753	162.2	70.55
754	162.3	41.59
755	162.4	24.9
756	162.5	39.69
757	162.6	104.5
758	162.7	159.85
759	162.8	91.97
760	162.9	0
761	163.1	0
762	163.2	95.26
763	163.3	168.33
764	163.4	90.67
765	163.5	0
766	164.1	0
767	164.2	18.5
768	164.3	60.97
769	164.4	52.87
770	164.5	0
771	165.4	0
772	165.5	23.73
773	165.6	14.25
774	165.7	0
775	165.8	0.67
776	165.9	26.22
777	166	53.6
778	166.1	63.47
779	166.2	57.88
780	166.3	45.01
781	166.4	28.17
782	166.5	24.92
783	166.6	71.44
784	166.7	164.65
785	166.8	241.08
786	166.9	234.51
787	167	147.76
788	167.1	44.32
789	167.2	0
790	167.6	0
791	167.7	6.96
792	167.8	7.51
793	167.9	12.21
794	168	25.4
795	168.1	37.6
796	168.2	38.78
797	168.3	26.15
798	168.4	4.73
799	168.5	0
800	169.2	0
801	169.3	12.27
802	169.4	2.22
803	169.5	0
804	170.1	0
805	170.2	23.5
806	170.3	118.47
807	170.4	217.34
808	170.5	311.28
809	170.6	412.94
810	170.7	625.19
811	170.8	969.13
812	170.9	1245.26
813	171	1206.43
814	171.1	865.09
815	171.2	459.84
816	171.3	152.81
817	171.4	0
818	172	0
819	172.1	25.77
820	172.2	63.91
821	172.3	72.67
822	172.4	73.93
823	172.5	74.48
824	172.6	40.37
825	172.7	0
826	173.2	0
827	173.3	25.66
828	173.4	25.67
829	173.5	0
830	174.9	0
831	175	69.74
832	175.1	114.25
833	175.2	93.42
834	175.3	40.67
835	175.4	21.17
836	175.5	71.69
837	175.6	110.45
838	175.7	111.58
839	175.8	129.72
840	175.9	185.16
841	176	214
842	176.1	173.94
843	176.2	126
844	176.3	145.21
845	176.4	205.46
846	176.5	225.62
847	176.6	189.41
848	176.7	126.64
849	176.8	47.01
850	176.9	0
851	177.2	0
852	177.3	31.99
853	177.4	87.94
854	177.5	101.47
855	177.6	106.11
856	177.7	123.03
857	177.8	117.22
858	177.9	95.75
859	178	79.39
860	178.1	93.12
861	178.2	162.8
862	178.3	325.87
863	178.4	609.64
864	178.5	995.12
865	178.6	1404.53
866	178.7	1708.59
867	178.8	1805.1
868	178.9	1735.03
869	179	1642.67
870	179.1	1569.53
871	179.2	1366.86
872	179.3	932.78
873	179.4	414.41
874	179.5	113.04
875	179.6	43.22
876	179.7	58.73
877	179.8	100.17
878	179.9	131.07
879	180	162.51
880	180.1	181.45
881	180.2	156.63
882	180.3	74.87
883	180.4	0
884	180.7	0
885	180.8	129.95
886	180.9	228.81
887	181	271.93
888	181.1	282.23
889	181.2	246.64
890	181.3	169.48
891	181.4	74.44
892	181.5	9.23
893	181.6	0
894	181.7	0
895	181.8	24.29
896	181.9	31.06
897	182	0
898	182.3	0
899	182.4	62.58
900	182.5	78.57
901	182.6	0
902	183.5	0
903	183.6	18.42
904	183.7	11.1
905	183.8	0
906	184.2	0
907	184.3	52.54
908	184.4	95.98
909	184.5	88.27
910	184.6	29.42
911	184.7	0
912	184.9	0
913	185	70.81
914	185.1	133.31
915	185.2	123.25
916	185.3	53.63
917	185.4	0
918	186	0
919	186.1	12.52
920	186.2	54.14
921	186.3	32.97
922	186.4	0
923	186.9	0
924	187	68.03
925	187.1	0
926	187.4	0
927	187.5	23.93
928	187.6	10.52
929	187.7	0
930	187.9	0
931	188	11.54
932	188.1	18.54
933	188.2	3.29
934	188.3	0
935	188.4	12.51
936	188.5	14.08
937	188.6	0
938	189	0
939	189.1	44.25
940	189.2	98.17
941	189.3	34.58
942	189.4	0
943	189.6	0
944	189.7	52.72
945	189.8	79.74
946	189.9	93.85
947	190	55.66
948	190.1	0
949	191.1	0
950	191.2	29.21
951	191.3	130.08
952	191.4	239.17
953	191.5	310.34
954	191.6	419.07
955	191.7	601.99
956	191.8	764.54
957	191.9	774.07
958	192	606.85
959	192.1	446.75
960	192.2	472.69
961	192.3	602.01
962	192.4	591.65
963	192.5	381.8
964	192.6	157.12
965	192.7	59.29
966	192.8	1.84
967	192.9	0
968	193.1	0
969	193.2	53.19
970	193.3	202.08
971	193.4	217.34
972	193.5	126.7
973	193.6	30.2
974	193.7	0
975	194.3	0
976	194.4	73.89
977	194.5	227.75
978	194.6	328.52
979	194.7	318.55
980	194.8	169.12
981	194.9	0
982	195.3	0
983	195.4	59.83
984	195.5	66.4
985	195.6	70.93
986	195.7	57.44
987	195.8	45.73
988	195.9	35.81
989	196	25.59
990	196.1	16.89
991	196.2	2.1
992	196.3	16.3
993	196.4	100.36
994	196.5	217.97
995	196.6	256.19
996	196.7	172.22
997	196.8	66.19
998	196.9	66.86
999	197	171.21
1000	197.1	255.09
1001	197.2	220.41
1002	197.3	100.5
1003	197.4	17.8
1004	197.5	38.43
1005	197.6	66.91
1006	197.7	0
1007	198.2	0
1008	198.3	6.2
1009	198.4	21.36
1010	198.5	38.41
1011	198.6	81.97
1012	198.7	134.65
1013	198.8	149.83
1014	198.9	105.95
1015	199	45.76
1016	199.1	30.13
1017	199.2	73.44
1018	199.3	141.95
1019	199.4	180.45
1020	199.5	157.22
1021	199.6	42.37
1022	199.7	0
1023	200.3	0
1024	200.4	41.22
1025	200.5	114.05
1026	200.6	130.23
1027	200.7	130.34
1028	200.8	115.4
1029	200.9	0
1030	201.4	0
1031	201.5	102.2
1032	201.6	154.95
1033	201.7	163.8
1034	201.8	32.89
1035	201.9	0
1036	202.2	0
1037	202.3	66.23
1038	202.4	33.74
1039	202.5	0
1040	203.5	0
1041	203.6	24.28
1042	203.7	46.61
1043	203.8	24.77
1044	203.9	0
1045	204	6.03
1046	204.1	16.26
1047	204.2	0
1048	204.6	0
1049	204.7	13.84
1050	204.8	218.19
1051	204.9	242.83
1052	205	45.83
1053	205.1	0
1054	205.3	0
1055	205.4	43.92
1056	205.5	0
1057	205.7	0
1058	205.8	0.66
1059	205.9	10.6
1060	206	0
1061	206.2	0
1062	206.3	38.38
1063	206.4	79.28
1064	206.5	159.9
1065	206.6	239.83
1066	206.7	242.2
1067	206.8	107.94
1068	206.9	0
1069	207.1	0
1070	207.2	62.8
1071	207.3	199.99
1072	207.4	154.2
1073	207.5	36.05
1074	207.6	0
1075	207.7	0
1076	207.8	5.38
1077	207.9	0
1078	208.1	0
1079	208.2	7.03
1080	208.3	51.02
1081	208.4	75.37
1082	208.5	40.31
1083	208.6	0
1084	208.9	0
1085	209	6.89
1086	209.1	57.68
1087	209.2	74.51
1088	209.3	80.31
1089	209.4	68.74
1090	209.5	46.65
1091	209.6	37.64
1092	209.7	40.03
1093	209.8	32.85
1094	209.9	13.4
1095	210	0
1096	210.1	7.18
1097	210.2	32.53
1098	210.3	59.58
1099	210.4	73.69
1100	210.5	73.79
1101	210.6	50.31
1102	210.7	0
1103	210.9	0
1104	211	65.98
1105	211.1	170.18
1106	211.2	188.09
1107	211.3	117.37
1108	211.4	35.06
1109	211.5	28.56
1110	211.6	40.36
1111	211.7	43.25
1112	211.8	29
1113	211.9	20.8
1114	212	28.08
1115	212.1	29.65
1116	212.2	0
1117	212.5	0
1118	212.6	32.25
1119	212.7	176.42
1120	212.8	216.04
1121	212.9	151.32
1122	213	95.96
1123	213.1	111.85
1124	213.2	145.61
1125	213.3	114.73
1126	213.4	28.44
1127	213.5	0
1128	213.9	0
1129	214	23.18
1130	214.1	96.55
1131	214.2	96.66
1132	214.3	65.45
1133	214.4	21.72
1134	214.5	0
1135	215	0
1136	215.1	40.43
1137	215.2	61.87
1138	215.3	59.59
1139	215.4	54.37
1140	215.5	48.48
1141	215.6	46.92
1142	215.7	35.15
1143	215.8	0
1144	216.2	0
1145	216.3	33.79
1146	216.4	73.9
1147	216.5	126.11
1148	216.6	183.48
1149	216.7	198.59
1150	216.8	143.55
1151	216.9	54.54
1152	217	4.93
1153	217.1	31.5
1154	217.2	104.18
1155	217.3	142.09
1156	217.4	114.9
1157	217.5	28.06
1158	217.6	0
1159	217.7	29.56
1160	217.8	148.34
1161	217.9	242.44
1162	218	253.48
1163	218.1	192.31
1164	218.2	68.95
1165	218.3	0
1166	218.9	0
1167	219	15.98
1168	219.1	88.17
1169	219.2	120.79
1170	219.3	87.85
1171	219.4	0
1172	219.8	0
1173	219.9	3.48
1174	220	42.2
1175	220.1	119.59
1176	220.2	159.3
1177	220.3	103.82
1178	220.4	24.76
1179	220.5	0
1180	221.2	0
1181	221.3	66.51
1182	221.4	45.23
1183	221.5	0
1184	221.7	0
1185	221.8	18.33
1186	221.9	1.75
1187	222	0
1188	222.3	0
1189	222.4	130.9
1190	222.5	181.34
1191	222.6	65.53
1192	222.7	0
1193	222.8	66.67
1194	222.9	249.09
1195	223	211.02
1196	223.1	0
1197	223.3	0
1198	223.4	219.91
1199	223.5	418.26
1200	223.6	321.62
1201	223.7	169.13
1202	223.8	72.59
1203	223.9	89.14
1204	224	149.95
1205	224.1	211.87
1206	224.2	239.57
1207	224.3	225.36
1208	224.4	206.34
1209	224.5	218.24
1210	224.6	251.39
1211	224.7	262.74
1212	224.8	220.4
1213	224.9	127.53
1214	225	12.67
1215	225.1	0
1216	225.4	0
1217	225.5	27.14
1218	225.6	22.21
1219	225.7	16.31
1220	225.8	12.67
1221	225.9	24.59
1222	226	31.53
1223	226.1	22.81
1224	226.2	25.99
1225	226.3	67.74
1226	226.4	118.71
1227	226.5	112.55
1228	226.6	18.66
1229	226.7	0
1230	226.9	0
1231	227	20.52
1232	227.1	70.41
1233	227.2	77.41
1234	227.3	65.26
1235	227.4	40.85
1236	227.5	20.44
1237	227.6	18.64
1238	227.7	19.78
1239	227.8	28.43
1240	227.9	44.82
1241	228	59.11
1242	228.1	62.37
1243	228.2	64.84
1244	228.3	87.65
1245	228.4	141
1246	228.5	206.85
1247	228.6	244.13
1248	228.7	243.08
1249	228.8	195.08
1250	228.9	97.59
1251	229	0
1252	229.2	0
1253	229.3	77.33
1254	229.4	101.5
1255	229.5	65.19
1256	229.6	0
1257	229.9	0
1258	230	33.17
1259	230.1	45.67
1260	230.2	3.26
1261	230.3	0
1262	231	0
1263	231.1	47.06
1264	231.2	103.14
1265	231.3	66.87
1266	231.4	3.21
1267	231.5	0
1268	231.6	0
1269	231.7	29.78
1270	231.8	75.23
1271	231.9	48.2
1272	232	0
1273	232.5	0
1274	232.6	50.5
1275	232.7	83.15
1276	232.8	72.49
1277	232.9	61.02
1278	233	79.94
1279	233.1	103
1280	233.2	89.84
1281	233.3	44.18
1282	233.4	0
1283	233.9	0
1284	234	21.58
1285	234.1	33.25
1286	234.2	28.4
1287	234.3	16.41
1288	234.4	0
1289	235.2	0
1290	235.3	24.84
1291	235.4	59.71
1292	235.5	85.06
1293	235.6	100.69
1294	235.7	100.12
1295	235.8	83.34
1296	235.9	54.65
1297	236	9.12
1298	236.1	0
1299	236.7	0
1300	236.8	28.65
1301	236.9	151.97
1302	237	131.29
1303	237.1	26.05
1304	237.2	0
1305	237.4	0
1306	237.5	7.24
1307	237.6	24.75
1308	237.7	2.85
1309	237.8	0
1310	238.6	0
1311	238.7	5.09
1312	238.8	85.11
1313	238.9	175.55
1314	239	194.27
1315	239.1	128.41
1316	239.2	61.02
1317	239.3	50.04
1318	239.4	64.87
1319	239.5	52.75
1320	239.6	3.68
1321	239.7	0
1322	239.9	0
1323	240	75.82
1324	240.1	133.25
1325	240.2	111.94
1326	240.3	61.13
1327	240.4	59.97
1328	240.5	102.43
1329	240.6	127.4
1330	240.7	45.35
1331	240.8	0
1332	241	0
1333	241.1	40.03
1334	241.2	152.24
1335	241.3	113.15
1336	241.4	50.49
1337	241.5	12.88
1338	241.6	3.16
1339	241.7	8.96
1340	241.8	14.08
1341	241.9	14.26
1342	242	13.37
1343	242.1	14.45
1344	242.2	19.44
1345	242.3	28.8
1346	242.4	39.11
1347	242.5	44.03
1348	242.6	40.76
1349	242.7	38.23
1350	242.8	39.91
1351	242.9	42.37
1352	243	40.84
1353	243.1	41.51
1354	243.2	46.08
1355	243.3	49.21
1356	243.4	64.71
1357	243.5	112.2
1358	243.6	198.25
1359	243.7	310.72
1360	243.8	395.5
1361	243.9	432.53
1362	244	445.23
1363	244.1	440.44
1364	244.2	381.34
1365	244.3	243.04
1366	244.4	84.53
1367	244.5	3.47
1368	244.6	0
1369	245.1	0
1370	245.2	32
1371	245.3	65.63
1372	245.4	44.81
1373	245.5	22.31
1374	245.6	16.02
1375	245.7	11.08
1376	245.8	0
1377	246.1	0
1378	246.2	9.22
1379	246.3	34.65
1380	246.4	26.37
1381	246.5	0
1382	247.9	0
1383	248	3.23
1384	248.1	10.68
1385	248.2	22.5
1386	248.3	51
1387	248.4	62.76
1388	248.5	41.43
1389	248.6	28.07
1390	248.7	32.7
1391	248.8	48.41
1392	248.9	60.14
1393	249	63.37
1394	249.1	65.44
1395	249.2	62.95
1396	249.3	46.4
1397	249.4	13.82
1398	249.5	0
1399	250.2	0
1400	250.3	13.32
1401	250.4	27.61
1402	250.5	0
1403	250.9	0
1404	251	94.15
1405	251.1	119.26
1406	251.2	96.83
1407	251.3	63.53
1408	251.4	41.38
1409	251.5	26.7
1410	251.6	7.09
1411	251.7	0
1412	251.8	0
1413	251.9	29.32
1414	252	43.04
1415	252.1	23.19
1416	252.2	5.64
1417	252.3	31.98
1418	252.4	87.22
1419	252.5	115.51
1420	252.6	83.41
1421	252.7	49.97
1422	252.8	72.68
1423	252.9	113.92
1424	253	83.34
1425	253.1	0
1426	253.3	0
1427	253.4	16.74
1428	253.5	89.91
1429	253.6	112.2
1430	253.7	89.93
1431	253.8	36.98
1432	253.9	0.03
1433	254	0
1434	254.1	0
1435	254.2	3.06
1436	254.3	0
1437	255	0
1438	255.1	13.41
1439	255.2	13.75
1440	255.3	0
1441	255.8	0
1442	255.9	7.96
1443	256	14.9
1444	256.1	4.1
1445	256.2	0
1446	256.4	0
1447	256.5	30.19
1448	256.6	61.14
1449	256.7	79.04
1450	256.8	117.83
1451	256.9	182.71
1452	257	227.97
1453	257.1	204.7
1454	257.2	130.06
1455	257.3	53.71
1456	257.4	8.64
1457	257.5	0
1458	257.6	2.26
1459	257.7	15.5
1460	257.8	23.75
1461	257.9	21.81
1462	258	13.38
1463	258.1	8.33
1464	258.2	10.03
1465	258.3	10.33
1466	258.4	4.11
1467	258.5	11.02
1468	258.6	33.08
1469	258.7	32.48
1470	258.8	0
1471	259.4	0
1472	259.5	6.21
1473	259.6	17.49
1474	259.7	23.44
1475	259.8	19.21
1476	259.9	2.73
1477	260	0
1478	260.2	0
1479	260.3	4.9
1480	260.4	0
1481	261.3	0
1482	261.4	4.5
1483	261.5	0
1484	263.1	0
1485	263.2	15.93
1486	263.3	35.91
1487	263.4	30.75
1488	263.5	10.61
1489	263.6	0
1490	263.9	0
1491	264	30.42
1492	264.1	41.4
1493	264.2	26.42
1494	264.3	1.08
1495	264.4	0
1496	265	0
1497	265.1	16.16
1498	265.2	20.6
1499	265.3	10.02
1500	265.4	0.97
1501	265.5	8.67
1502	265.6	36.14
1503	265.7	63.94
1504	265.8	68.9
1505	265.9	47.8
1506	266	19.49
1507	266.1	4.76
1508	266.2	2.22
1509	266.3	9.11
1510	266.4	24.74
1511	266.5	40.42
1512	266.6	36.38
1513	266.7	0.13
1514	266.8	0
1515	267	0
1516	267.1	19.76
1517	267.2	41.32
1518	267.3	28.75
1519	267.4	6.26
1520	267.5	0
1521	267.6	0
1522	267.7	6.91
1523	267.8	7.03
1524	267.9	0
1525	268.8	0
1526	268.9	1.42
1527	269	9.11
1528	269.1	6.54
1529	269.2	0
1530	269.5	0
1531	269.6	26.93
1532	269.7	83.49
1533	269.8	45.09
1534	269.9	0
1535	270.7	0
1536	270.8	19.41
1537	270.9	6.27
1538	271	0
1539	271.6	0
1540	271.7	18.71
1541	271.8	64.09
1542	271.9	88.21
1543	272	83.39
1544	272.1	59.86
1545	272.2	29.05
1546	272.3	0
1547	272.5	0
1548	272.6	66.93
1549	272.7	130.5
1550	272.8	143.58
1551	272.9	109.32
1552	273	65.76
1553	273.1	37.06
1554	273.2	18.33
1555	273.3	9.47
1556	273.4	5.47
1557	273.5	3.38
1558	273.6	2.69
1559	273.7	1.36
1560	273.8	1.13
1561	273.9	4.37
1562	274	9.32
1563	274.1	10.63
1564	274.2	5.69
1565	274.3	0
1566	274.7	0
1567	274.8	13.63
1568	274.9	25.79
1569	275	25.18
1570	275.1	18.61
1571	275.2	10.62
1572	275.3	9.29
1573	275.4	22.77
1574	275.5	52.49
1575	275.6	85.24
1576	275.7	102.03
1577	275.8	88.75
1578	275.9	36.89
1579	276	0
1580	276.3	0
1581	276.4	0.85
1582	276.5	28.27
1583	276.6	39.22
1584	276.7	32.14
1585	276.8	7.02
1586	276.9	0
1587	277.1	0
1588	277.2	33.19
1589	277.3	48.21
1590	277.4	30.39
1591	277.5	0
1592	277.8	0
1593	277.9	4.53
1594	278	12.19
1595	278.1	1.38
1596	278.2	0
1597	278.4	0
1598	278.5	11.13
1599	278.6	30.38
1600	278.7	42.93
1601	278.8	36.26
1602	278.9	0
1603	279.4	0
1604	279.5	13.78
1605	279.6	13.39
1606	279.7	9.08
1607	279.8	5.61
1608	279.9	0
1609	280.4	0
1610	280.5	47.58
1611	280.6	186.89
1612	280.7	276.95
1613	280.8	284.63
1614	280.9	166.5
1615	281	0
1616	281.3	0
1617	281.4	122.99
1618	281.5	152.62
1619	281.6	110.1
1620	281.7	91.9
1621	281.8	105.83
1622	281.9	44.59
1623	282	0
1624	282.5	0
1625	282.6	57.82
1626	282.7	85.25
1627	282.8	73.16
1628	282.9	7.24
1629	283	0
1630	283.2	0
1631	283.3	52.94
1632	283.4	53.29
1633	283.5	8.73
1634	283.6	10.64
1635	283.7	57.44
1636	283.8	104.49
1637	283.9	109.54
1638	284	78.17
1639	284.1	55.89
1640	284.2	46.31
1641	284.3	28.57
1642	284.4	2.66
1643	284.5	0
1644	285.3	0
1645	285.4	11.04
1646	285.5	20.73
1647	285.6	12.1
1648	285.7	0.07
1649	285.8	0
1650	286.4	0
1651	286.5	16.07
1652	286.6	22.8
1653	286.7	21.91
1654	286.8	18.53
1655	286.9	18.01
1656	287	17.73
1657	287.1	14.92
1658	287.2	10.02
1659	287.3	6.17
1660	287.4	5.73
1661	287.5	7.77
1662	287.6	6.37
1663	287.7	0
1664	288.1	0
1665	288.2	5.66
1666	288.3	15.02
1667	288.4	20.45
1668	288.5	29.73
1669	288.6	36.07
1670	288.7	33.17
1671	288.8	26.93
1672	288.9	25.65
1673	289	28.55
1674	289.1	29.51
1675	289.2	24.76
1676	289.3	9.05
1677	289.4	0
1678	290	0
1679	290.1	6.86
1680	290.2	8.47
1681	290.3	3.51
1682	290.4	0.36
1683	290.5	5.49
1684	290.6	15.29
1685	290.7	26.02
1686	290.8	32.84
1687	290.9	38.8
1688	291	50.98
1689	291.1	63.86
1690	291.2	54.56
1691	291.3	22.6
1692	291.4	0
1693	291.5	4.4
1694	291.6	14.18
1695	291.7	19.74
1696	291.8	54.4
1697	291.9	128.77
1698	292	168.35
1699	292.1	147.95
1700	292.2	101.93
1701	292.3	82.71
1702	292.4	113.13
1703	292.5	169.23
1704	292.6	215.25
1705	292.7	207.58
1706	292.8	125.07
1707	292.9	6.84
1708	293	0
1709	293.3	0
1710	293.4	15.59
1711	293.5	25.31
1712	293.6	10.22
1713	293.7	0
1714	293.8	12.1
1715	293.9	33.2
1716	294	34.07
1717	294.1	0
1718	294.5	0
1719	294.6	19.15
1720	294.7	27.28
1721	294.8	0
1722	295.1	0
1723	295.2	11.45
1724	295.3	33.24
1725	295.4	24.79
1726	295.5	13.91
1727	295.6	9.65
1728	295.7	8.88
1729	295.8	6.77
1730	295.9	0.19
1731	296	0
1732	296.1	0
1733	296.2	68.04
1734	296.3	182.97
1735	296.4	83.56
1736	296.5	0
1737	296.7	0
1738	296.8	428.97
1739	296.9	802.47
1740	297	802.2
1741	297.1	693.27
1742	297.2	632.39
1743	297.3	548.24
1744	297.4	405.04
1745	297.5	249.89
1746	297.6	128.26
1747	297.7	0
1748	298.2	0
1749	298.3	57.01
1750	298.4	178.1
1751	298.5	97.95
1752	298.6	4.18
1753	298.7	4
1754	298.8	96.85
1755	298.9	193.54
1756	299	254.09
1757	299.1	276.75
1758	299.2	248.63
1759	299.3	159.98
1760	299.4	54.63
1761	299.5	0
1762	299.7	0
1763	299.8	8.39
1764	299.9	45.33
1765	300	93.38
1766	300.1	97.01
1767	300.2	42.57
1768	300.3	0
1769	300.4	0
1770	300.5	6.81
1771	300.6	15.21
1772	300.7	0
1773	301.3	0
1774	301.4	5.75
1775	301.5	2.99
1776	301.6	0.43
1777	301.7	1.95
1778	301.8	3.54
1779	301.9	2.71
1780	302	1.45
1781	302.1	2.5
1782	302.2	5.39
1783	302.3	7.51
1784	302.4	8.03
1785	302.5	9.34
1786	302.6	12.5
1787	302.7	17
1788	302.8	22.6
1789	302.9	28.25
1790	303	30.26
1791	303.1	25.78
1792	303.2	16.66
1793	303.3	7.53
1794	303.4	1.52
1795	303.5	0
1796	304.1	0
1797	304.2	1.19
1798	304.3	1.35
1799	304.4	0
1800	304.9	0
1801	305	4.53
1802	305.1	14.59
1803	305.2	14.76
1804	305.3	11.39
1805	305.4	10.71
1806	305.5	12.6
1807	305.6	9.89
1808	305.7	0
1809	306	0
1810	306.1	9.06
1811	306.2	23.45
1812	306.3	14.05
1813	306.4	0
1814	306.8	0
1815	306.9	16.36
1816	307	25.92
1817	307.1	22.13
1818	307.2	14.08
1819	307.3	9.72
1820	307.4	13.42
1821	307.5	17.62
1822	307.6	14.06
1823	307.7	6.7
1824	307.8	4.8
1825	307.9	8.73
1826	308	9.81
1827	308.1	5.02
1828	308.2	1.26
1829	308.3	0
1830	308.6	0
1831	308.7	20.59
1832	308.8	122.94
1833	308.9	162.95
1834	309	107.4
1835	309.1	24.15
1836	309.2	0
1837	309.3	4.19
1838	309.4	18.84
1839	309.5	42.72
1840	309.6	60.46
1841	309.7	61.28
1842	309.8	41.79
1843	309.9	17.98
1844	310	9.39
1845	310.1	16.48
1846	310.2	26.06
1847	310.3	32.9
1848	310.4	35.47
1849	310.5	32.45
1850	310.6	24.82
1851	310.7	17.34
1852	310.8	10.65
1853	310.9	0
1854	311.3	0
1855	311.4	0.09
1856	311.5	8.39
1857	311.6	11.81
1858	311.7	6.58
1859	311.8	0
1860	312.4	0
1861	312.5	32.07
1862	312.6	58.76
1863	312.7	83.6
1864	312.8	117.55
1865	312.9	141.59
1866	313	129.87
1867	313.1	82.83
1868	313.2	30.16
1869	313.3	1.25
1870	313.4	0
1871	314.1	0
1872	314.2	7.71
1873	314.3	5.86
1874	314.4	0
1875	315.7	0
1876	315.8	1.84
1877	315.9	4.69
1878	316	2.9
1879	316.1	0
1880	316.4	0
1881	316.5	1.65
1882	316.6	0
1883	316.8	0
1884	316.9	4.28
1885	317	15.02
1886	317.1	18.95
1887	317.2	16.71
1888	317.3	13.45
1889	317.4	10.65
1890	317.5	6.21
1891	317.6	1.66
1892	317.7	0
1893	317.8	0.38
1894	317.9	1.67
1895	318	1
1896	318.1	0
1897	318.4	0
1898	318.5	6.95
1899	318.6	22.24
1900	318.7	32.56
1901	318.8	33.33
1902	318.9	26.67
1903	319	17.62
1904	319.1	8.92
1905	319.2	1.12
1906	319.3	0
1907	319.6	0
1908	319.7	8.12
1909	319.8	15.26
1910	319.9	13.59
1911	320	9.08
1912	320.1	5.6
1913	320.2	0.46
1914	320.3	0
1915	320.5	0
1916	320.6	11.39
1917	320.7	17.25
1918	320.8	14
1919	320.9	7
1920	321	2.63
1921	321.1	2.08
1922	321.2	1.79
1923	321.3	0
1924	321.4	0
1925	321.5	6.95
1926	321.6	24.61
1927	321.7	36.81
1928	321.8	31.8
1929	321.9	16.16
1930	322	7.07
1931	322.1	12.35
1932	322.2	15.24
1933	322.3	4.1
1934	322.4	0
1935	323.4	0
1936	323.5	2.69
1937	323.6	5.48
1938	323.7	1.69
1939	323.8	2.9
1940	323.9	11.09
1941	324	18.41
1942	324.1	18.48
1943	324.2	14.75
1944	324.3	14.73
1945	324.4	15.1
1946	324.5	0.96
1947	324.6	0
1948	325.2	0
1949	325.3	0.5
1950	325.4	2.77
1951	325.5	2.11
1952	325.6	1.02
1953	325.7	1.83
1954	325.8	4.22
1955	325.9	6.46
1956	326	6.54
1957	326.1	3.88
1958	326.2	1.18
1959	326.3	3.68
1960	326.4	13.99
1961	326.5	27.03
1962	326.6	32.29
1963	326.7	21.43
1964	326.8	0
1965	327.1	0
1966	327.2	12.26
1967	327.3	32.6
1968	327.4	35.13
1969	327.5	24.76
1970	327.6	15.92
1971	327.7	17.12
1972	327.8	20.02
1973	327.9	19.15
1974	328	12.93
1975	328.1	6.85
1976	328.2	3.6
1977	328.3	2.94
1978	328.4	9.58
1979	328.5	28.69
1980	328.6	58.89
1981	328.7	77.11
1982	328.8	66.42
1983	328.9	34.75
1984	329	5.39
1985	329.1	0
1986	329.6	0
1987	329.7	14.42
1988	329.8	31.9
1989	329.9	37.64
1990	330	29.77
1991	330.1	13.48
1992	330.2	0
1993	330.4	0
1994	330.5	3.82
1995	330.6	7.66
1996	330.7	10.41
1997	330.8	14.94
[truncated: 1,929 more rows]

## Sheet: Sheet3
+ESI Scan (rt: 1.12-1.37 min, 54 scans) Frag=100.0V CF=0.000 DF=0.000 4608-01.d Subtract
Index	X	Y
0	50	0
1	50.3	0
2	50.4	0.04
3	50.5	0.42
4	50.6	0.48
5	50.7	0.44
6	50.8	0.39
7	50.9	0.37
8	51	0.46
9	51.1	0.6
10	51.2	0.41
11	51.3	0
12	51.4	0
13	51.5	0.24
14	51.6	1.12
15	51.7	1.4
16	51.8	0.96
17	51.9	0.42
18	52	0.19
19	52.1	0.03
20	52.2	0
21	52.5	0
22	52.6	0.04
23	52.7	0.41
24	52.8	0.65
25	52.9	0.77
26	53	0.71
27	53.1	0.34
28	53.2	0
29	54.2	0
30	54.3	2.32
31	54.4	3.24
32	54.5	0
33	55.6	0
34	55.7	9.39
35	55.8	8.41
36	55.9	0
37	56	0
38	56.1	6.16
39	56.2	37.89
40	56.3	73.05
41	56.4	86.38
42	56.5	47.91
43	56.6	0
44	57.7	0
45	57.8	24.25
46	57.9	1.59
47	58	0
48	59.7	0
49	59.8	49.52
50	59.9	0
51	62.6	0
52	62.7	0.14
53	62.8	0
54	63.5	0
55	63.6	0.47
56	63.7	0
57	65.1	0
58	65.2	0.24
59	65.3	0.12
60	65.4	0
61	65.5	0.17
62	65.6	0.64
63	65.7	0.83
64	65.8	0.49
65	65.9	0
66	66.7	0
67	66.8	0.1
68	66.9	0
69	67.6	0
70	67.7	0.52
71	67.8	0
72	68.1	0
73	68.2	0.26
74	68.3	0
75	71.7	0
76	71.8	3.48
77	71.9	0
78	72	12.25
79	72.1	13.67
80	72.2	0
81	73.5	0
82	73.6	6301.93
83	73.7	32252.1
84	73.8	72133.6
85	73.9	117788
86	74	153500
87	74.1	170322
88	74.2	172417
89	74.3	163996
90	74.4	139184
91	74.5	94509.1
92	74.6	43688.8
93	74.7	8091.57
94	74.8	0
95	74.9	0
96	75	2806.21
97	75.1	5288.36
98	75.2	5884.29
99	75.3	5587.18
100	75.4	4562.09
101	75.5	2908.61
102	75.6	1210.33
103	75.7	167.1
104	75.8	35.19
105	75.9	129.35
106	76	335.33
107	76.1	498.84
108	76.2	540.49
109	76.3	457.06
110	76.4	291.92
111	76.5	127.24
112	76.6	9.19
113	76.7	0
114	79.5	0
115	79.6	25.66
116	79.7	37.64
117	79.8	33.19
118	79.9	6.76
119	80	0
120	89.7	0
121	89.8	13.62
122	89.9	0
123	91.6	0
124	91.7	11.12
125	91.8	6.14
126	91.9	0
127	92.3	0
128	92.4	121.93
129	92.5	398.45
130	92.6	926.32
131	92.7	1765.75
132	92.8	2826.51
133	92.9	3814.08
134	93	4448.34
135	93.1	4742.84
136	93.2	4773.37
137	93.3	4340.7
138	93.4	3229.97
139	93.5	1728.06
140	93.6	522.18
141	93.7	26.24
142	93.8	0
143	94.1	0
144	94.2	1.17
145	94.3	25.81
146	94.4	33.28
147	94.5	35.09
148	94.6	51.18
149	94.7	118.36
150	94.8	199.56
151	94.9	214.12
152	95	152.76
153	95.1	94.03
154	95.2	143.7
155	95.3	284.78
156	95.4	622.69
157	95.5	1561.48
158	95.6	3286.23
159	95.7	5803.31
160	95.8	8890.46
161	95.9	11968.9
162	96	14247.2
163	96.1	15189.5
164	96.2	14658.6
165	96.3	12587.6
166	96.4	9068.91
167	96.5	4948.82
168	96.6	1659.65
169	96.7	218.81
170	96.8	0
171	96.9	67.18
172	97	166.33
173	97.1	169.57
174	97.2	126.54
175	97.3	95.87
176	97.4	83.05
177	97.5	42.78
178	97.6	0
179	99.5	0
180	99.6	134.6
181	99.7	330.18
182	99.8	218.36
183	99.9	56.36
184	100	55.3
185	100.1	158.56
186	100.2	189.43
187	100.3	117.78
188	100.4	100.03
189	100.5	251.51
190	100.6	550.1
191	100.7	864.08
192	100.8	1109.29
193	100.9	1238.99
194	101	1278.46
195	101.1	1338.18
196	101.2	1428.04
197	101.3	1350.24
198	101.4	964.15
199	101.5	439.69
200	101.6	55.54
201	101.7	0
202	103.6	0
203	103.7	17.78
204	103.8	0
205	105.9	0
206	106	2.95
207	106.1	7.48
208	106.2	0
209	108.4	0
210	108.5	159.94
211	108.6	744.23
212	108.7	1646.63
213	108.8	2398.88
214	108.9	2634.65
215	109	2460.41
216	109.1	2267.02
217	109.2	2174.69
218	109.3	1929.73
219	109.4	1345.8
220	109.5	629.27
221	109.6	155.49
222	109.7	2.33
223	109.8	0
224	111.5	0
225	111.6	18.14
226	111.7	5.38
227	111.8	0
228	117.5	0
229	117.6	21.91
230	117.7	61.37
231	117.8	72.93
232	117.9	65.92
233	118	59.44
234	118.1	62.94
235	118.2	65.61
236	118.3	42.66
237	118.4	0
238	119.6	0
239	119.7	4.93
240	119.8	0
241	121.2	0
242	121.3	642.02
243	121.4	1454.31
244	121.5	2351.46
245	121.6	3134.23
246	121.7	3309.56
247	121.8	2705.9
248	121.9	1687.94
249	122	791.76
250	122.1	314.13
251	122.2	238.75
252	122.3	328.29
253	122.4	339.97
254	122.5	211.2
255	122.6	110.34
256	122.7	162.46
257	122.8	233.43
258	122.9	217.98
259	123	144.05
260	123.1	126.25
261	123.2	147.53
262	123.3	136.27
263	123.4	86.51
264	123.5	55.76
265	123.6	45.54
266	123.7	33.29
267	123.8	20.17
268	123.9	7.9
269	124	0
270	124.2	0
271	124.3	0.93
272	124.4	0
273	128.3	0
274	128.4	24.47
275	128.5	34.65
276	128.6	0
277	128.7	0
278	128.8	357.22
279	128.9	2062.15
280	129	5454.08
281	129.1	10125.2
282	129.2	15145.1
283	129.3	19669.2
284	129.4	23089.9
285	129.5	24845.9
286	129.6	24569.1
287	129.7	22250
288	129.8	18065.1
289	129.9	12552.1
290	130	7088.72
291	130.1	3338.33
292	130.2	1818.88
293	130.3	1550.21
294	130.4	1204.9
295	130.5	482.11
296	130.6	0
297	131.4	0
298	131.5	71.87
299	131.6	381.39
300	131.7	439.52
301	131.8	328.95
302	131.9	228.17
303	132	243.31
304	132.1	389.83
305	132.2	611.58
306	132.3	805.19
307	132.4	874.53
308	132.5	775.25
309	132.6	551.6
310	132.7	223.05
311	132.8	0
312	133.7	0
313	133.8	75.85
314	133.9	159.74
315	134	187.66
316	134.1	107.24
317	134.2	0
318	135.6	0
319	135.7	0.68
320	135.8	135.13
321	135.9	329.38
322	136	515.06
323	136.1	647.58
324	136.2	763.92
325	136.3	919.87
326	136.4	1043.54
327	136.5	908.09
328	136.6	370.39
329	136.7	0
330	136.8	0
331	136.9	327.92
332	137	2851.52
333	137.1	6556.06
334	137.2	10492.1
335	137.3	13799.7
336	137.4	16198.3
337	137.5	17879.1
338	137.6	18879.7
339	137.7	18557
340	137.8	16002.7
341	137.9	11351.5
342	138	6402.84
343	138.1	3290.77
344	138.2	2505.89
345	138.3	2821.55
346	138.4	2947.9
347	138.5	2658.94
348	138.6	2279.62
349	138.7	1918.01
350	138.8	1441.99
351	138.9	923.68
352	139	586.69
353	139.1	529.66
354	139.2	587.76
355	139.3	599.18
356	139.4	559.31
357	139.5	561.8
358	139.6	643.09
359	139.7	704.86
360	139.8	618.4
361	139.9	392.32
362	140	204.2
363	140.1	155.14
364	140.2	182.78
365	140.3	166.4
366	140.4	85.3
367	140.5	26.72
368	140.6	15.31
369	140.7	30.61
370	140.8	44.79
371	140.9	38.15
372	141	8.95
373	141.1	9.32
374	141.2	75.96
375	141.3	197.53
376	141.4	276.91
377	141.5	226.15
378	141.6	27.84
379	141.7	0
380	143.6	0
381	143.7	5.95
382	143.8	22.28
383	143.9	0
384	144.9	0
385	145	1522.09
386	145.1	3798.81
387	145.2	6290.26
388	145.3	8460.95
389	145.4	9874.14
390	145.5	10545.7
391	145.6	10782.4
392	145.7	10516.7
393	145.8	9218.94
394	145.9	6767.86
395	146	3900.74
396	146.1	1689.11
397	146.2	732.5
398	146.3	1076.63
399	146.4	2907.09
400	146.5	6527.24
401	146.6	11703.1
402	146.7	17710.2
403	146.8	23559.5
404	146.9	28011.2
405	147	30007.4
406	147.1	29612.4
407	147.2	27630.3
408	147.3	23968.8
409	147.4	17858.3
410	147.5	10183.4
411	147.6	3826.38
412	147.7	1059.66
413	147.8	1159.79
414	147.9	1981.88
415	148	2357.36
416	148.1	2261.52
417	148.2	2025.43
418	148.3	1690.84
419	148.4	1165.33
420	148.5	530.87
421	148.6	86.79
422	148.7	0
423	151.5	0
424	151.6	18.83
425	151.7	39.77
426	151.8	56.06
427	151.9	62.6
428	152	59.24
429	152.1	45.96
430	152.2	14.77
431	152.3	0
432	153.5	0
433	153.6	18.08
434	153.7	100.33
435	153.8	23.78
436	153.9	0
437	155.5	0
438	155.6	11.08
439	155.7	18.66
440	155.8	22.82
441	155.9	18.35
442	156	5.25
443	156.1	0
444	157.8	0
445	157.9	110.25
446	158	97.94
447	158.1	0
448	158.3	0
449	158.4	27.74
450	158.5	31.92
451	158.6	0
452	159.2	0
453	159.3	10.21
454	159.4	194.02
455	159.5	353.07
456	159.6	468.67
457	159.7	497.53
458	159.8	421.52
459	159.9	301.6
460	160	245.21
461	160.1	311.97
462	160.2	414.96
463	160.3	406.8
464	160.4	228.29
465	160.5	0
466	162.3	0
467	162.4	3.15
468	162.5	15.7
469	162.6	0
470	163.1	0
471	163.2	11.19
472	163.3	27.24
473	163.4	19.98
474	163.5	7.5
475	163.6	8
476	163.7	23.55
477	163.8	38.31
478	163.9	34.59
479	164	15.49
480	164.1	0
481	164.6	0
482	164.7	0.57
483	164.8	12.04
484	164.9	7.95
485	165	3.4
486	165.1	13.88
487	165.2	41.49
488	165.3	92.31
489	165.4	166.21
490	165.5	230.22
491	165.6	290.39
492	165.7	421.18
493	165.8	691.21
494	165.9	971.58
495	166	1016.47
496	166.1	760.73
497	166.2	413.6
498	166.3	201.03
499	166.4	160.51
500	166.5	166.83
501	166.6	129.25
502	166.7	59.31
503	166.8	15.44
504	166.9	9.49
505	167	16.43
506	167.1	11.04
507	167.2	0
508	167.5	0
509	167.6	0.92
510	167.7	4.77
511	167.8	7.46
512	167.9	7.97
513	168	0
514	168.3	0
515	168.4	11.02
516	168.5	233.1
517	168.6	556.19
518	168.7	909.07
519	168.8	1207.84
520	168.9	1349.05
521	169	1291.98
522	169.1	1106.87
523	169.2	896.62
524	169.3	671.74
525	169.4	399.21
526	169.5	143.26
527	169.6	6.92
528	169.7	2.89
529	169.8	35.98
530	169.9	39.64
531	170	20.75
532	170.1	21.17
533	170.2	32.48
534	170.3	5.83
535	170.4	0
536	173	0
537	173.1	0.65
538	173.2	25.59
539	173.3	0
540	173.8	0
541	173.9	14
542	174	134.17
543	174.1	213.73
544	174.2	194.22
545	174.3	105.61
546	174.4	0
547	174.9	0
548	175	45.79
549	175.1	55.84
550	175.2	0
551	175.5	0
552	175.6	16.48
553	175.7	88.2
554	175.8	135.93
555	175.9	133.53
556	176	85.47
557	176.1	19.32
558	176.2	0
559	180.1	0
560	180.2	9.8
561	180.3	25.07
562	180.4	28.04
563	180.5	26.51
564	180.6	23.88
565	180.7	18.78
566	180.8	17.71
567	180.9	28.21
568	181	46.34
569	181.1	55.56
570	181.2	49.8
571	181.3	40.25
572	181.4	34.4
573	181.5	36.95
574	181.6	53.37
575	181.7	90.76
576	181.8	134.64
577	181.9	152.03
578	182	122.98
579	182.1	61.66
580	182.2	0
581	184	0
582	184.1	1.44
583	184.2	0
584	186.2	0
585	186.3	0.24
586	186.4	0
587	187.6	0
588	187.7	0.73
589	187.8	4.35
590	187.9	8.55
591	188	11.1
592	188.1	8.16
593	188.2	0
594	190.2	0
595	190.3	57.7
596	190.4	31.04
597	190.5	0
598	195.2	0
599	195.3	12.29
600	195.4	28.45
601	195.5	29.63
602	195.6	6.82
603	195.7	0
604	196	0
605	196.1	3.54
606	196.2	16.97
607	196.3	9.39
608	196.4	0
609	197.2	0
610	197.3	14.01
611	197.4	16.34
612	197.5	2.79
613	197.6	0
614	197.7	18.24
615	197.8	52.75
616	197.9	75.6
617	198	66.4
618	198.1	28.25
619	198.2	0
620	199.3	0
621	199.4	27.91
622	199.5	49.65
623	199.6	43.86
624	199.7	7.06
625	199.8	0
626	201.4	0
627	201.5	112.21
628	201.6	170.36
629	201.7	141.43
630	201.8	77.71
631	201.9	36.99
632	202	34.22
633	202.1	41.63
634	202.2	30.76
635	202.3	0.97
636	202.4	0
637	202.5	0
638	202.6	20.08
639	202.7	48.38
640	202.8	46.32
641	202.9	20.86
642	203	0
643	203.4	0
644	203.5	7.49
645	203.6	9.18
646	203.7	0
647	204.1	0
648	204.2	35.06
649	204.3	62.49
650	204.4	46.12
651	204.5	0
652	206.2	0
653	206.3	141.59
654	206.4	389.15
655	206.5	655.99
656	206.6	874.25
657	206.7	1146.23
658	206.8	1649.39
659	206.9	2364.61
660	207	3034.39
661	207.1	3345.16
662	207.2	3054.34
663	207.3	2136.94
664	207.4	962.72
665	207.5	125.15
666	207.6	0
667	207.7	86.3
668	207.8	270.17
669	207.9	331.9
670	208	230.62
671	208.1	85.6
672	208.2	0
673	208.4	0
674	208.5	47.84
675	208.6	92.06
676	208.7	80.12
677	208.8	34.87
678	208.9	0
679	209	16.49
680	209.1	74.24
681	209.2	119.66
682	209.3	127.55
683	209.4	145.43
684	209.5	224.91
685	209.6	341.19
686	209.7	413.36
687	209.8	409.76
688	209.9	369.86
689	210	340.84
690	210.1	303.42
691	210.2	210.19
692	210.3	76.39
693	210.4	0
694	211	0
695	211.1	5.88
696	211.2	44.45
697	211.3	84.67
698	211.4	111.76
699	211.5	108.64
700	211.6	78.25
701	211.7	46.08
702	211.8	29.14
703	211.9	19.18
704	212	17.67
705	212.1	23.01
706	212.2	28.67
707	212.3	24.8
708	212.4	12.88
709	212.5	0.09
710	212.6	0
711	212.9	0
712	213	10.77
713	213.1	106.58
714	213.2	183.87
715	213.3	231.33
716	213.4	247.62
717	213.5	267.58
718	213.6	361.45
719	213.7	556.46
720	213.8	775.4
721	213.9	888.09
722	214	840.62
723	214.1	691.72
724	214.2	501.5
725	214.3	285.93
726	214.4	94.85
727	214.5	0
728	214.6	0
729	214.7	10.28
730	214.8	86.26
731	214.9	183.36
732	215	274.04
733	215.1	312.31
734	215.2	273.07
735	215.3	192.58
736	215.4	117.28
737	215.5	64.04
738	215.6	33.27
739	215.7	9.21
740	215.8	0
741	216.8	0
742	216.9	11.66
743	217	20.07
744	217.1	0
745	219.6	0
746	219.7	3.32
747	219.8	1
748	219.9	0
749	225.4	0
750	225.5	22.97
751	225.6	102.42
752	225.7	224.11
753	225.8	385.91
754	225.9	486.43
755	226	449.86
756	226.1	312.57
757	226.2	165.51
758	226.3	73.78
759	226.4	15.73
760	226.5	0
761	227.3	0
762	227.4	39.17
763	227.5	78.68
764	227.6	80.44
765	227.7	58.09
766	227.8	34.93
767	227.9	25.35
768	228	21.14
769	228.1	12.87
770	228.2	2.06
771	228.3	0
772	229.4	0
773	229.5	11.18
774	229.6	9.85
775	229.7	0
776	229.9	0
777	230	20.39
778	230.1	13.71
779	230.2	0
780	230.9	0
781	231	48.37
782	231.1	0
783	232.1	0
784	232.2	47.3
785	232.3	75.45
786	232.4	24.65
787	232.5	0
788	233.3	0
789	233.4	131.25
790	233.5	173.84
791	233.6	166.69
792	233.7	146.39
793	233.8	115.58
794	233.9	73.02
795	234	12.02
796	234.1	0
797	234.2	0
798	234.3	22.23
799	234.4	72.53
800	234.5	115.31
801	234.6	129.89
802	234.7	136.76
803	234.8	161.85
804	234.9	205.56
805	235	241.05
806	235.1	235.94
807	235.2	199.26
808	235.3	161.33
809	235.4	138.84
810	235.5	123.53
811	235.6	67.2
812	235.7	0
813	235.8	0
814	235.9	16.4
815	236	123.35
816	236.1	175.1
817	236.2	133.98
818	236.3	40.98
819	236.4	0
820	237.5	0
821	237.6	12.25
822	237.7	8.76
823	237.8	0
824	238.2	0
825	238.3	8.82
826	238.4	13.7
827	238.5	7.25
828	238.6	10.12
829	238.7	41.01
830	238.8	76.08
831	238.9	74.66
832	239	30.97
833	239.1	0
834	239.3	0
835	239.4	4.83
836	239.5	24.25
837	239.6	28.98
838	239.7	19.27
839	239.8	6.49
840	239.9	3.59
841	240	9.52
842	240.1	15.67
843	240.2	18.74
844	240.3	20.72
845	240.4	22.98
846	240.5	14.08
847	240.6	0
848	241	0
849	241.1	5.3
850	241.2	0
851	241.4	0
852	241.5	5.93
853	241.6	14.4
854	241.7	12.95
855	241.8	2.2
856	241.9	0
857	242.3	0
858	242.4	1.88
859	242.5	18.79
860	242.6	32.47
861	242.7	31.2
862	242.8	21.9
863	242.9	18.16
864	243	21.53
865	243.1	15.59
866	243.2	2.36
867	243.3	0
868	243.6	0
869	243.7	3.21
870	243.8	27.13
871	243.9	38.85
872	244	32.22
873	244.1	20.73
874	244.2	16.94
875	244.3	16.65
876	244.4	27.9
877	244.5	56.72
878	244.6	88.56
879	244.7	92.21
880	244.8	50.06
881	244.9	0
882	245.2	0
883	245.3	32.65
884	245.4	51.23
885	245.5	61.84
886	245.6	79.61
887	245.7	94.31
888	245.8	82.82
889	245.9	38.86
890	246	1.37
891	246.1	0
892	246.2	5.37
893	246.3	27.41
894	246.4	105.23
895	246.5	328.31
896	246.6	649.94
897	246.7	851.97
898	246.8	760.77
899	246.9	486.91
900	247	321.9
901	247.1	384.62
902	247.2	517.31
903	247.3	530.22
904	247.4	433.88
905	247.5	381.12
906	247.6	501.9
907	247.7	767.69
908	247.8	989.99
909	247.9	1029.01
910	248	914.53
911	248.1	747.2
912	248.2	580.72
913	248.3	459.92
914	248.4	428.1
915	248.5	522.52
916	248.6	698.95
917	248.7	1012.28
918	248.8	1371.37
919	248.9	1579.2
920	249	1538.41
921	249.1	1374.8
922	249.2	1225.97
923	249.3	1031.02
924	249.4	706.73
925	249.5	345.09
926	249.6	99.62
927	249.7	23.97
928	249.8	28.69
929	249.9	32.38
930	250	11.58
931	250.1	0
932	250.2	0
933	250.3	10.22
934	250.4	64.97
935	250.5	92.26
936	250.6	86.54
937	250.7	72.07
938	250.8	65.27
939	250.9	60.25
940	251	44
941	251.1	16.36
942	251.2	0
943	251.3	0
944	251.4	11.96
945	251.5	32.49
946	251.6	58.35
947	251.7	87.83
948	251.8	107.2
949	251.9	95.87
950	252	59.88
951	252.1	21.88
952	252.2	0
953	252.9	0
954	253	4.33
955	253.1	36.53
956	253.2	29.42
957	253.3	7.19
958	253.4	3.29
959	253.5	30.28
960	253.6	76.13
961	253.7	116.52
962	253.8	129.35
963	253.9	116.68
964	254	100.8
965	254.1	93.34
966	254.2	79.74
967	254.3	44.79
968	254.4	8.72
969	254.5	1.94
970	254.6	15.77
971	254.7	24.8
972	254.8	23.16
973	254.9	26.07
974	255	37.41
975	255.1	41.01
976	255.2	31.07
977	255.3	15.62
978	255.4	4.87
979	255.5	1.13
980	255.6	2.71
981	255.7	8.32
982	255.8	15.11
983	255.9	17.55
984	256	10.76
985	256.1	0
986	256.3	0
987	256.4	14.93
988	256.5	40.19
989	256.6	57.87
990	256.7	69.79
991	256.8	79.24
992	256.9	80.42
993	257	63.25
994	257.1	32.45
995	257.2	4.78
996	257.3	0
997	257.5	0
998	257.6	11.8
999	257.7	25.95
1000	257.8	28.62
1001	257.9	15.32
1002	258	0
1003	258.2	0
1004	258.3	6.95
1005	258.4	23.46
1006	258.5	37.68
1007	258.6	46.59
1008	258.7	49.3
1009	258.8	47.4
1010	258.9	42.36
1011	259	34.54
1012	259.1	21.35
1013	259.2	15.03
1014	259.3	20.89
1015	259.4	47.08
1016	259.5	75.06
1017	259.6	83.96
1018	259.7	68.99
1019	259.8	43.98
1020	259.9	23.88
1021	260	9.67
1022	260.1	0
1023	260.2	0
1024	260.3	5.57
1025	260.4	15.5
1026	260.5	12.42
1027	260.6	0
1028	260.7	0
1029	260.8	1.43
1030	260.9	28.75
1031	261	52.66
1032	261.1	53.63
1033	261.2	30.31
1034	261.3	0
1035	262.4	0
1036	262.5	12.21
1037	262.6	39.75
1038	262.7	42.54
1039	262.8	31.69
1040	262.9	27.82
1041	263	55.96
1042	263.1	130.57
1043	263.2	237.1
1044	263.3	311.13
1045	263.4	306.97
1046	263.5	257.48
1047	263.6	289.19
1048	263.7	512.02
1049	263.8	872.32
1050	263.9	1160.8
1051	264	1196.06
1052	264.1	972.78
1053	264.2	617.55
1054	264.3	279.98
1055	264.4	69.05
1056	264.5	2.96
1057	264.6	3.95
1058	264.7	17.35
1059	264.8	14.19
1060	264.9	10.13
1061	265	25.86
1062	265.1	43.73
1063	265.2	46.46
1064	265.3	38.01
1065	265.4	31.38
1066	265.5	33.84
1067	265.6	52.71
1068	265.7	84.83
1069	265.8	108.03
1070	265.9	103.28
1071	266	74.01
1072	266.1	40.51
1073	266.2	17.82
1074	266.3	13.47
1075	266.4	36.15
1076	266.5	85.34
1077	266.6	156.43
1078	266.7	230.54
1079	266.8	281.23
1080	266.9	288.16
1081	267	244.33
1082	267.1	161.5
1083	267.2	68.47
1084	267.3	2.21
1085	267.4	0
1086	267.5	4.79
1087	267.6	26.94
1088	267.7	35.74
1089	267.8	30.33
1090	267.9	22.71
1091	268	17.11
1092	268.1	14.61
1093	268.2	10.91
1094	268.3	3.3
1095	268.4	0
1096	268.6	0
1097	268.7	9.74
1098	268.8	38.47
1099	268.9	51.54
1100	269	38.23
1101	269.1	14.17
1102	269.2	0.03
1103	269.3	1.31
1104	269.4	3.64
1105	269.5	0
1106	269.9	0
1107	270	36.09
1108	270.1	53.71
1109	270.2	44.54
1110	270.3	30.99
1111	270.4	32.4
1112	270.5	44.44
1113	270.6	49.65
1114	270.7	44.42
1115	270.8	41.28
1116	270.9	43.05
1117	271	36.49
1118	271.1	14.35
1119	271.2	0
1120	271.5	0
1121	271.6	3.26
1122	271.7	12.95
1123	271.8	14.98
1124	271.9	4.68
1125	272	0
1126	272.4	0
1127	272.5	9.21
1128	272.6	20.42
1129	272.7	21.98
1130	272.8	11.57
1131	272.9	0
1132	273.3	0
1133	273.4	1.85
1134	273.5	4.72
1135	273.6	8.18
1136	273.7	11
1137	273.8	9.68
1138	273.9	3.45
1139	274	0
1140	274.2	0
1141	274.3	9.39
1142	274.4	26.5
1143	274.5	28.77
1144	274.6	14.26
1145	274.7	1.53
1146	274.8	9.31
1147	274.9	30.75
1148	275	43.34
1149	275.1	35.71
1150	275.2	17.97
1151	275.3	6.27
1152	275.4	2.11
1153	275.5	3.14
1154	275.6	7.28
1155	275.7	11.53
1156	275.8	11.89
1157	275.9	8.34
1158	276	5.83
1159	276.1	6.27
1160	276.2	6.53
1161	276.3	4.72
1162	276.4	1.6
1163	276.5	0
1164	276.8	0
1165	276.9	1.67
1166	277	20.69
1167	277.1	35.67
1168	277.2	37.96
1169	277.3	34.43
1170	277.4	29.48
1171	277.5	16.66
1172	277.6	0
1173	277.9	0
1174	278	5.78
1175	278.1	15.54
1176	278.2	26.99
1177	278.3	45.99
1178	278.4	71.05
1179	278.5	92.22
1180	278.6	105.39
1181	278.7	138.13
1182	278.8	198.17
1183	278.9	243.59
1184	279	222.69
1185	279.1	143.89
1186	279.2	73.49
1187	279.3	39.08
1188	279.4	38.99
1189	279.5	52.32
1190	279.6	53.34
1191	279.7	32.99
1192	279.8	1.28
1193	279.9	0
1194	280	0
1195	280.1	5.42
1196	280.2	0
1197	282.1	0
1198	282.2	5.95
1199	282.3	66.19
1200	282.4	259.32
1201	282.5	648.43
1202	282.6	1168.72
1203	282.7	1631.82
1204	282.8	1860.64
1205	282.9	1838.02
1206	283	1656.09
1207	283.1	1379.2
1208	283.2	983.88
1209	283.3	516.39
1210	283.4	143.25
1211	283.5	0
1212	283.6	0
1213	283.7	40.37
1214	283.8	110.33
1215	283.9	147.59
1216	284	125.58
1217	284.1	64.91
1218	284.2	21.59
1219	284.3	36.68
1220	284.4	102.56
1221	284.5	187.18
1222	284.6	268.18
1223	284.7	314.71
1224	284.8	290.17
1225	284.9	212.93
1226	285	143.96
1227	285.1	123.4
1228	285.2	122.14
1229	285.3	88.74
1230	285.4	44.54
1231	285.5	18.57
1232	285.6	15.16
1233	285.7	25.06
1234	285.8	44.12
1235	285.9	66.16
1236	286	72.76
1237	286.1	60.42
1238	286.2	58.74
1239	286.3	131.01
1240	286.4	348.3
1241	286.5	652.85
1242	286.6	935.42
1243	286.7	1126.14
1244	286.8	1270.74
1245	286.9	1441.53
1246	287	1588.12
1247	287.1	1519.68
1248	287.2	1129.29
1249	287.3	572.59
1250	287.4	143.01
1251	287.5	0
1252	287.6	22.38
1253	287.7	91.96
1254	287.8	153.68
1255	287.9	165.07
1256	288	139.67
1257	288.1	99.94
1258	288.2	61.78
1259	288.3	33.59
1260	288.4	20.26
1261	288.5	20.22
1262	288.6	32.01
1263	288.7	51.58
1264	288.8	77.33
1265	288.9	96.34
1266	289	93.89
1267	289.1	67.87
1268	289.2	33.17
1269	289.3	8.48
1270	289.4	1.16
1271	289.5	0.64
1272	289.6	1.11
1273	289.7	1.82
1274	289.8	4.34
1275	289.9	10.17
1276	290	14.96
1277	290.1	13.92
1278	290.2	9.66
1279	290.3	10.4
1280	290.4	18.54
1281	290.5	26.79
1282	290.6	26.65
1283	290.7	17.77
1284	290.8	5.17
1285	290.9	0
1286	291	10.86
1287	291.1	30.39
1288	291.2	35.26
1289	291.3	31.86
1290	291.4	51.12
1291	291.5	105.79
1292	291.6	151.39
1293	291.7	144.77
1294	291.8	115.67
1295	291.9	134.34
1296	292	201.34
1297	292.1	232.01
1298	292.2	167.78
1299	292.3	53.58
1300	292.4	0
1301	292.7	0
1302	292.8	3
1303	292.9	0
1304	293.2	0
1305	293.3	52.65
1306	293.4	121.09
1307	293.5	186.15
1308	293.6	230.62
1309	293.7	249.29
1310	293.8	255.09
1311	293.9	260.56
1312	294	254.14
1313	294.1	214.49
1314	294.2	132.71
1315	294.3	48.63
1316	294.4	0
1317	294.5	0
1318	294.6	4.9
1319	294.7	19.26
1320	294.8	32.38
1321	294.9	40.57
1322	295	34.07
1323	295.1	13.05
1324	295.2	0
1325	295.3	0
1326	295.4	15.5
1327	295.5	30.79
1328	295.6	40.55
1329	295.7	49.15
1330	295.8	57.42
1331	295.9	62.07
1332	296	58.53
1333	296.1	31.1
1334	296.2	0
1335	298.3	0
1336	298.4	94.51
1337	298.5	423.97
1338	298.6	497.02
1339	298.7	379.23
1340	298.8	198
1341	298.9	85.19
1342	299	72.24
1343	299.1	94.23
1344	299.2	81.27
1345	299.3	33.64
1346	299.4	0
1347	299.9	0
1348	300	2.15
1349	300.1	43.11
1350	300.2	55.25
1351	300.3	58
1352	300.4	57.88
1353	300.5	51.15
1354	300.6	40.48
1355	300.7	42.08
1356	300.8	59.57
1357	300.9	77.86
1358	301	82.09
1359	301.1	69.06
1360	301.2	44.2
1361	301.3	17.13
1362	301.4	0
1363	301.6	0
1364	301.7	5.2
1365	301.8	14.27
1366	301.9	18.39
1367	302	18.23
1368	302.1	15.45
1369	302.2	11.39
1370	302.3	7.37
1371	302.4	5.83
1372	302.5	8.06
1373	302.6	11.67
1374	302.7	13.78
1375	302.8	14.37
1376	302.9	11.95
1377	303	5.58
1378	303.1	0
1379	303.2	0
1380	303.3	20.83
1381	303.4	71.83
1382	303.5	103.44
1383	303.6	105.71
1384	303.7	104.35
1385	303.8	110.06
1386	303.9	90.73
1387	304	39.15
1388	304.1	0
1389	304.4	0
1390	304.5	17.93
1391	304.6	24.66
1392	304.7	27.41
1393	304.8	26.1
1394	304.9	17.02
1395	305	5.15
1396	305.1	4.43
1397	305.2	24.95
1398	305.3	53.28
1399	305.4	92.56
1400	305.5	147.15
1401	305.6	208.01
1402	305.7	244.9
1403	305.8	230.97
1404	305.9	175.12
1405	306	118.8
1406	306.1	100.69
1407	306.2	98.95
1408	306.3	77.18
1409	306.4	50.69
1410	306.5	67.33
1411	306.6	121.92
1412	306.7	135.42
1413	306.8	72.99
1414	306.9	7.14
1415	307	29.22
1416	307.1	141.51
1417	307.2	238.64
1418	307.3	238.11
1419	307.4	186.22
1420	307.5	152.88
1421	307.6	175.38
1422	307.7	245
1423	307.8	319.18
1424	307.9	349.5
1425	308	319.29
1426	308.1	242.74
1427	308.2	153.82
1428	308.3	84.42
1429	308.4	32.86
1430	308.5	16.25
1431	308.6	24.83
1432	308.7	26.71
1433	308.8	14.8
1434	308.9	0
1435	309.2	0
1436	309.3	3.94
1437	309.4	4.1
1438	309.5	0
1439	310	0
1440	310.1	4.07
1441	310.2	3.85
1442	310.3	0.9
1443	310.4	0
1444	310.6	0
1445	310.7	1.7
1446	310.8	12.56
1447	310.9	16.39
1448	311	9.55
1449	311.1	1.96
1450	311.2	5.94
1451	311.3	28.96
1452	311.4	66.88
1453	311.5	105.64
1454	311.6	121.96
1455	311.7	102.01
1456	311.8	61.08
1457	311.9	31.95
1458	312	25.92
1459	312.1	28.36
1460	312.2	20.57
1461	312.3	7.11
1462	312.4	0.05
1463	312.5	10.18
1464	312.6	24.4
1465	312.7	28.71
1466	312.8	20.79
1467	312.9	10.23
1468	313	8.32
1469	313.1	15.05
1470	313.2	24.03
1471	313.3	28.18
1472	313.4	30.86
1473	313.5	42.83
1474	313.6	63.05
1475	313.7	76.46
1476	313.8	72.08
1477	313.9	66.48
1478	314	65.35
1479	314.1	58.48
1480	314.2	39.91
1481	314.3	20.37
1482	314.4	12.58
1483	314.5	8.74
1484	314.6	2.24
1485	314.7	0
1486	315.2	0
1487	315.3	1.57
1488	315.4	19.6
1489	315.5	44.39
1490	315.6	55.51
1491	315.7	41.73
1492	315.8	16.17
1493	315.9	0.84
1494	316	0
1495	316.2	0
1496	316.3	0.22
1497	316.4	1.76
1498	316.5	1.9
1499	316.6	0
1500	317.3	0
1501	317.4	1.58
1502	317.5	14.25
1503	317.6	28.47
1504	317.7	31.41
1505	317.8	21.81
1506	317.9	14.4
1507	318	17.28
1508	318.1	20.9
1509	318.2	14.59
1510	318.3	3.22
1511	318.4	0
1512	318.5	0.62
1513	318.6	5.36
1514	318.7	8.87
1515	318.8	10.56
1516	318.9	11.49
1517	319	10.3
1518	319.1	5.75
1519	319.2	0
1520	319.8	0
1521	319.9	0.89
1522	320	1.36
1523	320.1	0
1524	320.2	2.12
1525	320.3	19.9
1526	320.4	53.22
1527	320.5	89.88
1528	320.6	143.25
1529	320.7	231.67
1530	320.8	348.36
1531	320.9	429.09
1532	321	413.97
1533	321.1	310.2
1534	321.2	180.44
1535	321.3	87.31
1536	321.4	38.9
1537	321.5	14.69
1538	321.6	7.94
1539	321.7	10.48
1540	321.8	22.72
1541	321.9	46.96
1542	322	66.3
1543	322.1	61.53
1544	322.2	39.39
1545	322.3	30.75
1546	322.4	61.22
1547	322.5	113.19
1548	322.6	156.03
1549	322.7	172.38
1550	322.8	161.67
1551	322.9	129.44
1552	323	92.87
1553	323.1	77.69
1554	323.2	100.14
1555	323.3	156.67
1556	323.4	227.28
1557	323.5	284.24
1558	323.6	301.52
1559	323.7	274.02
1560	323.8	221.86
1561	323.9	182.56
1562	324	169.3
1563	324.1	150.67
1564	324.2	97.64
1565	324.3	33.48
1566	324.4	0
1567	324.5	1.03
1568	324.6	10.26
1569	324.7	14.07
1570	324.8	15.94
1571	324.9	22.16
1572	325	28.4
1573	325.1	26.31
1574	325.2	16.86
1575	325.3	12.16
1576	325.4	14.43
1577	325.5	25.13
1578	325.6	35.49
1579	325.7	35.53
1580	325.8	23.86
1581	325.9	7.99
1582	326	0
1583	326.2	0
1584	326.3	4.07
1585	326.4	16.76
1586	326.5	27.12
1587	326.6	25.94
1588	326.7	12.78
1589	326.8	1.68
1590	326.9	5.9
1591	327	25.43
1592	327.1	42.28
1593	327.2	41.83
1594	327.3	27.7
1595	327.4	14.59
1596	327.5	10.97
1597	327.6	14.95
1598	327.7	22.27
1599	327.8	32.01
1600	327.9	38.26
1601	328	34.04
1602	328.1	21.09
1603	328.2	13.43
1604	328.3	28.73
1605	328.4	55.69
1606	328.5	67.74
1607	328.6	51.05
1608	328.7	21.38
1609	328.8	7.32
1610	328.9	8.31
1611	329	14.99
1612	329.1	19.14
1613	329.2	21.74
1614	329.3	27.59
1615	329.4	32.31
1616	329.5	30.62
1617	329.6	25
1618	329.7	23.23
1619	329.8	33.19
1620	329.9	45.59
1621	330	46.02
1622	330.1	31.86
1623	330.2	13.63
1624	330.3	2.06
1625	330.4	0
1626	330.7	0
1627	330.8	3.58
1628	330.9	7.54
1629	331	9.85
1630	331.1	10.42
1631	331.2	9.7
1632	331.3	6.87
1633	331.4	0
1634	331.7	0
1635	331.8	24.7
1636	331.9	51.16
1637	332	51.86
1638	332.1	24.8
1639	332.2	0
1640	332.4	0
1641	332.5	6.7
1642	332.6	24.52
1643	332.7	37.73
1644	332.8	41.7
1645	332.9	35.11
1646	333	22.15
1647	333.1	10.14
1648	333.2	3.44
1649	333.3	3.9
1650	333.4	7.88
1651	333.5	10.83
1652	333.6	9.63
1653	333.7	3.35
1654	333.8	0
1655	334.2	0
1656	334.3	4.04
1657	334.4	6.3
1658	334.5	5.59
1659	334.6	3.03
1660	334.7	0.12
1661	334.8	0
1662	335.3	0
1663	335.4	2.44
1664	335.5	17.34
1665	335.6	32.4
1666	335.7	40.9
1667	335.8	33.56
1668	335.9	13.37
1669	336	0
1670	336.2	0
1671	336.3	0.18
1672	336.4	0.68
1673	336.5	0
1674	336.7	0
1675	336.8	8.96
1676	336.9	25.63
1677	337	37.31
1678	337.1	33.35
1679	337.2	18.27
1680	337.3	6.29
1681	337.4	3.35
1682	337.5	3.9
1683	337.6	3.88
1684	337.7	3.87
1685	337.8	3.8
1686	337.9	1.87
1687	338	0
1688	338.7	0
1689	338.8	2.88
1690	338.9	4.45
1691	339	3.71
1692	339.1	2.59
1693	339.2	2.31
1694	339.3	1.68
1695	339.4	0
1696	339.6	0
1697	339.7	0.07
1698	339.8	10.96
1699	339.9	17.81
1700	340	15.41
1701	340.1	7.22
1702	340.2	1.15
1703	340.3	1.66
1704	340.4	7.85
1705	340.5	13.57
1706	340.6	13.74
1707	340.7	10.27
1708	340.8	8.9
1709	340.9	10.45
1710	341	9.2
1711	341.1	3.53
1712	341.2	0
1713	341.3	0
1714	341.4	6.44
1715	341.5	15.87
1716	341.6	18.56
1717	341.7	8.39
1718	341.8	0
1719	342.1	0
1720	342.2	5.72
1721	342.3	6.57
1722	342.4	6.8
1723	342.5	8.93
1724	342.6	10.04
1725	342.7	7.64
1726	342.8	3.97
1727	342.9	3.63
1728	343	7.39
1729	343.1	10.68
1730	343.2	9.71
1731	343.3	7.01
1732	343.4	9.97
1733	343.5	22.87
1734	343.6	47.52
1735	343.7	81.04
1736	343.8	116.44
1737	343.9	143.7
1738	344	138.06
1739	344.1	93.73
1740	344.2	35.46
1741	344.3	0
1742	344.5	0
1743	344.6	10.35
1744	344.7	24.28
1745	344.8	34.59
1746	344.9	35.55
1747	345	26.64
1748	345.1	14.6
1749	345.2	5.56
1750	345.3	0.33
1751	345.4	0
1752	345.8	0
1753	345.9	1.49
1754	346	6.34
1755	346.1	4.94
1756	346.2	2.09
1757	346.3	0.91
1758	346.4	1.27
1759	346.5	2.23
1760	346.6	1.68
1761	346.7	0
1762	347.2	0
1763	347.3	4.04
1764	347.4	5.38
1765	347.5	5.08
1766	347.6	4.06
1767	347.7	4.9
1768	347.8	10.49
1769	347.9	17.07
1770	348	18.49
1771	348.1	15.51
1772	348.2	14.09
1773	348.3	15.31
1774	348.4	13.87
1775	348.5	11.12
1776	348.6	17.43
1777	348.7	38.32
1778	348.8	60.63
1779	348.9	63.82
1780	349	43.33
1781	349.1	15.53
1782	349.2	0
1783	349.3	0
1784	349.4	2.83
1785	349.5	9.76
1786	349.6	8.44
1787	349.7	0
1788	350.1	0
1789	350.2	2.16
1790	350.3	4.68
1791	350.4	3.96
1792	350.5	0
1793	350.8	0
1794	350.9	1.67
1795	351	11.33
1796	351.1	10.04
1797	351.2	2.25
1798	351.3	0
1799	351.5	0
1800	351.6	4.22
1801	351.7	11.7
1802	351.8	17.04
1803	351.9	17.74
1804	352	15.74
1805	352.1	13.55
1806	352.2	11.44
1807	352.3	13.27
1808	352.4	24.02
1809	352.5	37.39
1810	352.6	39.14
1811	352.7	24.57
1812	352.8	7.27
1813	352.9	2.07
1814	353	1.78
1815	353.1	3.81
1816	353.2	6.7
1817	353.3	7.84
1818	353.4	6.53
1819	353.5	4.96
1820	353.6	3.98
1821	353.7	0.6
1822	353.8	0
1823	354.2	0
1824	354.3	7.36
1825	354.4	13.98
1826	354.5	12.26
1827	354.6	1.06
1828	354.7	0
1829	355	0
1830	355.1	13.23
1831	355.2	19.28
1832	355.3	14.73
1833	355.4	8.01
1834	355.5	3.56
1835	355.6	1.38
1836	355.7	4.51
1837	355.8	11.26
1838	355.9	14.35
1839	356	9.49
1840	356.1	1.25
1841	356.2	0
1842	356.3	0
1843	356.4	1
1844	356.5	2.13
1845	356.6	3.16
1846	356.7	7.82
1847	356.8	13.6
1848	356.9	13.03
1849	357	6.77
1850	357.1	5.33
1851	357.2	22.5
1852	357.3	49.6
1853	357.4	70.13
1854	357.5	78.93
1855	357.6	95.93
1856	357.7	130.4
1857	357.8	167.68
1858	357.9	190.52
1859	358	191.29
1860	358.1	165.03
1861	358.2	115.35
1862	358.3	58.67
1863	358.4	25.61
1864	358.5	26.5
1865	358.6	47.38
1866	358.7	66.05
1867	358.8	75.97
1868	358.9	82.63
1869	359	84.58
1870	359.1	71.46
1871	359.2	43.22
1872	359.3	16.04
1873	359.4	3.18
1874	359.5	2.42
1875	359.6	4.79
1876	359.7	7.69
1877	359.8	10.15
1878	359.9	10.71
1879	360	9.41
1880	360.1	8.91
1881	360.2	11.26
1882	360.3	13.94
1883	360.4	14.25
1884	360.5	14.46
1885	360.6	20.87
1886	360.7	32.25
1887	360.8	37.7
1888	360.9	32.36
1889	361	25.42
1890	361.1	24.87
1891	361.2	24.94
1892	361.3	17.94
1893	361.4	6.96
1894	361.5	0.91
1895	361.6	0.03
1896	361.7	0.87
1897	361.8	0.9
1898	361.9	0
1899	362.4	0
1900	362.5	1.65
1901	362.6	6.05
1902	362.7	8.32
1903	362.8	9.04
1904	362.9	9.07
1905	363	8.77
1906	363.1	8.02
1907	363.2	7.12
1908	363.3	7.22
1909	363.4	8.94
1910	363.5	10.76
1911	363.6	10.47
1912	363.7	8.26
1913	363.8	6.06
1914	363.9	3.54
1915	364	0
1916	364.1	0
1917	364.2	0.78
1918	364.3	11.68
1919	364.4	22.09
1920	364.5	40.24
1921	364.6	70.87
1922	364.7	115.35
1923	364.8	155.07
1924	364.9	169.25
1925	365	149.17
1926	365.1	104.35
1927	365.2	56.73
1928	365.3	31.66
1929	365.4	29.39
1930	365.5	36.41
1931	365.6	31.98
1932	365.7	16.51
1933	365.8	4.22
1934	365.9	4.51
1935	366	3.07
1936	366.1	0
1937	366.2	0.66
1938	366.3	13.22
1939	366.4	32.31
1940	366.5	49.24
1941	366.6	64.44
1942	366.7	87.69
1943	366.8	112.49
1944	366.9	117.43
1945	367	91.57
1946	367.1	50.35
1947	367.2	16.69
1948	367.3	0.18
1949	367.4	0
1950	367.9	0
1951	368	11.43
1952	368.1	15.17
1953	368.2	8.31
1954	368.3	0
1955	369.3	0
1956	369.4	0.49
1957	369.5	6.72
1958	369.6	9.73
1959	369.7	5.61
1960	369.8	0
1961	373.6	0
1962	373.7	2.81
1963	373.8	4.4
1964	373.9	5.21
1965	374	4.2
1966	374.1	0.57
1967	374.2	0
1968	375	0
1969	375.1	7.13
1970	375.2	9.95
1971	375.3	4.18
1972	375.4	0.51
1973	375.5	8.59
1974	375.6	26.46
1975	375.7	50.21
1976	375.8	63.06
1977	375.9	54.13
1978	376	29.76
1979	376.1	7.32
1980	376.2	2.16
1981	376.3	6.44
1982	376.4	10.45
1983	376.5	10.67
1984	376.6	6.04
1985	376.7	0.87
1986	376.8	0
1987	376.9	0
1988	377	0.03
1989	377.1	0.14
1990	377.2	0
1991	377.3	0
1992	377.4	0.99
1993	377.5	4.63
1994	377.6	11.98
1995	377.7	21.27
1996	377.8	26.43
1997	377.9	23.52
[truncated: 1,883 more rows]

## Sheet: Sheet4
+ESI Scan (rt: 2.62-2.79 min, 37 scans) Frag=100.0V CF=0.000 DF=0.000 4608-01.d Subtract
Index	X	Y
0	50	0.32
1	50.1	0
2	50.3	0
3	50.4	0.21
4	50.5	0.47
5	50.6	0
6	51.3	0
7	51.4	0.07
8	51.5	0.2
9	51.6	0.32
10	51.7	0.34
11	51.8	0.32
12	51.9	0.38
13	52	0.5
14	52.1	0.49
15	52.2	0.2
16	52.3	0
17	52.6	0
18	52.7	0.03
19	52.8	0.53
20	52.9	0.67
21	53	0.14
22	53.1	0
23	53.6	0
24	53.7	0.1
25	53.8	0.28
26	53.9	0.38
27	54	0.21
28	54.1	0
29	55	0
30	55.1	52.22
31	55.2	145.15
32	55.3	218.75
33	55.4	214.36
34	55.5	137.46
35	55.6	50.16
36	55.7	0
37	56	0
38	56.1	4.54
39	56.2	21.42
40	56.3	36.29
41	56.4	34.76
42	56.5	30.65
43	56.6	45.17
44	56.7	86.41
45	56.8	132.92
46	56.9	195.63
47	57	262.97
48	57.1	272.93
49	57.2	164.05
50	57.3	0
51	57.6	0
52	57.7	3.77
53	57.8	9.57
54	57.9	10.22
55	58	10.16
56	58.1	15.76
57	58.2	28.29
58	58.3	69.42
59	58.4	93.6
60	58.5	72.21
61	58.6	29.78
62	58.7	55.12
63	58.8	172.21
64	58.9	290.37
65	59	370.24
66	59.1	399.72
67	59.2	336.51
68	59.3	88.09
69	59.4	0
70	60	0
71	60.1	10.9
72	60.2	134.04
73	60.3	183.97
74	60.4	70.1
75	60.5	0
76	60.6	0
77	60.7	424.66
78	60.8	1479.42
79	60.9	2495.58
80	61	2863.62
81	61.1	2623.95
82	61.2	2333.5
83	61.3	2242.08
84	61.4	2028.1
85	61.5	1420.68
86	61.6	656.15
87	61.7	114.03
88	61.8	8.8
89	61.9	35.91
90	62	26.05
91	62.1	0
92	62.3	0
93	62.4	31.94
94	62.5	61.02
95	62.6	30.7
96	62.7	0
97	62.9	0
98	63	14.71
99	63.1	8.15
100	63.2	0
101	63.4	0
102	63.5	4.85
103	63.6	11.19
104	63.7	2.73
105	63.8	0
106	64.5	0
107	64.6	1.23
108	64.7	2.16
109	64.8	1.66
110	64.9	1.73
111	65	2.13
112	65.1	1.71
113	65.2	0.61
114	65.3	0
115	65.4	0
116	65.5	0.29
117	65.6	0.56
118	65.7	0.47
119	65.8	0.12
120	65.9	0
121	66.1	0
122	66.2	0.14
123	66.3	0.25
124	66.4	0.08
125	66.5	0
126	67.1	0
127	67.2	0.01
128	67.3	1.74
129	67.4	3.31
130	67.5	3.09
131	67.6	1.36
132	67.7	0
133	68	0
134	68.1	6.18
135	68.2	14.24
136	68.3	14.03
137	68.4	6.11
138	68.5	0
139	70.3	0
140	70.4	1.33
141	70.5	47.5
142	70.6	58.58
143	70.7	26.9
144	70.8	40.62
145	70.9	187.49
146	71	400.46
147	71.1	476.02
148	71.2	315.12
149	71.3	74.48
150	71.4	0
151	71.5	41.07
152	71.6	119.97
153	71.7	83.78
154	71.8	4.15
155	71.9	0
156	72.5	0
157	72.6	223.74
158	72.7	717.8
159	72.8	1204.63
160	72.9	1617.93
161	73	1875.5
162	73.1	1885.42
163	73.2	1751.59
164	73.3	1746.16
165	73.4	1921
166	73.5	1939.09
167	73.6	1472.5
168	73.7	633.52
169	73.8	0
170	74.6	0
171	74.7	49.42
172	74.8	164.74
173	74.9	228.76
174	75	250.96
175	75.1	197
176	75.2	77.51
177	75.3	0
178	76.1	0
179	76.2	0.62
180	76.3	4.48
181	76.4	0
182	76.7	0
183	76.8	5.84
184	76.9	3.41
185	77	0
186	77.4	0
187	77.5	138.24
188	77.6	224.09
189	77.7	114.58
190	77.8	0
191	78.5	0
192	78.6	30.06
193	78.7	47.96
194	78.8	25.82
195	78.9	0
196	79.4	0
197	79.5	9.29
198	79.6	59.15
199	79.7	75.98
200	79.8	37.62
201	79.9	0
202	80.3	0
203	80.4	17.69
204	80.5	24.74
205	80.6	0
206	80.8	0
207	80.9	37.76
208	81	99.2
209	81.1	184.73
210	81.2	287.08
211	81.3	336.3
212	81.4	272.4
213	81.5	132.75
214	81.6	23.04
215	81.7	0
216	82	0
217	82.1	31.44
218	82.2	44.71
219	82.3	23.52
220	82.4	0
221	82.8	0
222	82.9	47.37
223	83	128.57
224	83.1	161.4
225	83.2	118.2
226	83.3	43.97
227	83.4	0
228	84.2	0
229	84.3	6.4
230	84.4	0
231	84.5	0
232	84.6	51.22
233	84.7	100.9
234	84.8	78.79
235	84.9	0.32
236	85	0
237	85.1	0
238	85.2	30.82
239	85.3	48.37
240	85.4	20.4
241	85.5	0
242	86.1	0
243	86.2	4.25
244	86.3	39.16
245	86.4	67.98
246	86.5	60.99
247	86.6	45.11
248	86.7	61.51
249	86.8	111.71
250	86.9	139.41
251	87	91.62
252	87.1	27.9
253	87.2	38.37
254	87.3	102.66
255	87.4	129.39
256	87.5	95.83
257	87.6	59.85
258	87.7	50.12
259	87.8	45.85
260	87.9	38.51
261	88	15.77
262	88.1	0
263	88.4	0
264	88.5	207.66
265	88.6	2060.46
266	88.7	5337.95
267	88.8	9661.89
268	88.9	13840.1
269	89	16522.6
270	89.1	17375.2
271	89.2	17030.3
272	89.3	15649.5
273	89.4	12527.1
274	89.5	7721.33
275	89.6	3019.33
276	89.7	274.74
277	89.8	28.6
278	89.9	154.83
279	90	505.17
280	90.1	775.84
281	90.2	1009.33
282	90.3	1082.18
283	90.4	900.53
284	90.5	561.53
285	90.6	245.83
286	90.7	65.9
287	90.8	0
288	90.9	2.2
289	91	38.75
290	91.1	98.72
291	91.2	142.23
292	91.3	142.02
293	91.4	103.18
294	91.5	55.68
295	91.6	27.92
296	91.7	10.74
297	91.8	0
298	92	0
299	92.1	5.81
300	92.2	0
301	92.5	0
302	92.6	1.11
303	92.7	24.63
304	92.8	0
305	93.3	0
306	93.4	1.33
307	93.5	0
308	94	0
309	94.1	15.62
310	94.2	26.66
311	94.3	31.75
312	94.4	33.44
313	94.5	31.99
314	94.6	24.67
315	94.7	12.98
316	94.8	7.66
317	94.9	9.19
318	95	24.95
319	95.1	59.57
320	95.2	96.22
321	95.3	118.48
322	95.4	112.21
323	95.5	71.54
324	95.6	0
325	97.1	0
326	97.2	6.01
327	97.3	40.46
328	97.4	55.7
329	97.5	33.26
330	97.6	0
331	98	0
332	98.1	34.46
333	98.2	66.39
334	98.3	47.61
335	98.4	0
336	98.8	0
337	98.9	145.14
338	99	208.08
339	99.1	57.28
340	99.2	0
341	99.3	109.67
342	99.4	363.47
343	99.5	437.44
344	99.6	264.64
345	99.7	58.93
346	99.8	0
347	100	0
348	100.1	2.67
349	100.2	1.94
350	100.3	0
351	100.7	0
352	100.8	25.03
353	100.9	156.49
354	101	193.53
355	101.1	79.04
356	101.2	0
357	101.6	0
358	101.7	157.54
359	101.8	406.91
360	101.9	542.35
361	102	655.42
362	102.1	942.73
363	102.2	1353.81
364	102.3	1522.69
365	102.4	1225.16
366	102.5	688.32
367	102.6	276.89
368	102.7	100.2
369	102.8	41.68
370	102.9	17.16
371	103	44.4
372	103.1	123.55
373	103.2	221.19
374	103.3	273.07
375	103.4	226.84
376	103.5	103.16
377	103.6	0
378	104	0
379	104.1	39.31
380	104.2	55.36
381	104.3	29.06
382	104.4	0
383	104.6	0
384	104.7	88.86
385	104.8	255.27
386	104.9	410.69
387	105	433.12
388	105.1	315.33
389	105.2	165.7
390	105.3	81.59
391	105.4	61.45
392	105.5	66.88
393	105.6	69.14
394	105.7	57.38
395	105.8	40.86
396	105.9	35.82
397	106	51.35
398	106.1	46.8
399	106.2	25.23
400	106.3	39.62
401	106.4	96.63
402	106.5	106.75
403	106.6	10.5
404	106.7	0
405	106.8	0
406	106.9	194.39
407	107	289.36
408	107.1	117.51
409	107.2	0
410	108.2	0
411	108.3	21.78
412	108.4	73.01
413	108.5	65.32
414	108.6	17.03
415	108.7	0
416	108.8	0
417	108.9	49.3
418	109	83.51
419	109.1	37.58
420	109.2	0
421	109.6	0
422	109.7	6.53
423	109.8	14.55
424	109.9	19.41
425	110	16.98
426	110.1	5.77
427	110.2	0
428	110.9	0
429	111	168.1
430	111.1	374.14
431	111.2	412.03
432	111.3	260.82
433	111.4	49.76
434	111.5	0
435	111.7	0
436	111.8	25.35
437	111.9	42.54
438	112	52.47
439	112.1	61.52
440	112.2	63.16
441	112.3	55.26
442	112.4	53.2
443	112.5	20.55
444	112.6	0
445	112.8	0
446	112.9	31.97
447	113	237.1
448	113.1	381.07
449	113.2	351.6
450	113.3	204.05
451	113.4	118.18
452	113.5	172.51
453	113.6	234.08
454	113.7	224.95
455	113.8	201.05
456	113.9	198.67
457	114	172.86
458	114.1	125.15
459	114.2	176.85
460	114.3	375.85
461	114.4	543.44
462	114.5	471.72
463	114.6	254.87
464	114.7	183.38
465	114.8	319.96
466	114.9	421.24
467	115	300.45
468	115.1	77.24
469	115.2	0
470	115.3	44.76
471	115.4	152.29
472	115.5	255.1
473	115.6	397.65
474	115.7	546.31
475	115.8	621.57
476	115.9	578.89
477	116	516.13
478	116.1	532.36
479	116.2	533.79
480	116.3	433.7
481	116.4	286
482	116.5	200.3
483	116.6	208.95
484	116.7	256.75
485	116.8	290.21
486	116.9	291.79
487	117	286.26
488	117.1	295.74
489	117.2	306.11
490	117.3	281.76
491	117.4	228.75
492	117.5	151.08
493	117.6	83.73
494	117.7	45.31
495	117.8	54.23
496	117.9	78.14
497	118	92.8
498	118.1	72
499	118.2	27.54
500	118.3	0
501	118.4	0
502	118.5	19.26
503	118.6	108.04
504	118.7	140.18
505	118.8	102.7
506	118.9	66.56
507	119	94.75
508	119.1	194.91
509	119.2	337.11
510	119.3	437.18
511	119.4	395.43
512	119.5	210.09
513	119.6	48.15
514	119.7	0
515	120	0
516	120.1	5.63
517	120.2	113.47
518	120.3	237.02
519	120.4	353.12
520	120.5	433.78
521	120.6	510.83
522	120.7	548.58
523	120.8	546.34
524	120.9	603.81
525	121	737.26
526	121.1	748.44
527	121.2	477.8
528	121.3	103.04
529	121.4	0
530	121.5	299.75
531	121.6	865.1
532	121.7	1435.61
533	121.8	1935.28
534	121.9	2290.69
535	122	2450.3
536	122.1	2369.81
537	122.2	2077.22
538	122.3	1632.1
539	122.4	1118.97
540	122.5	669.29
541	122.6	403.3
542	122.7	312.55
543	122.8	282.17
544	122.9	239.75
545	123	166.41
546	123.1	99.02
547	123.2	86.43
548	123.3	109.08
549	123.4	107.58
550	123.5	54.98
551	123.6	0
552	124.1	0
553	124.2	3.94
554	124.3	15.03
555	124.4	42.28
556	124.5	62.41
557	124.6	57.12
558	124.7	56.43
559	124.8	93.5
560	124.9	139.23
561	125	133.12
562	125.1	68.53
563	125.2	5.9
564	125.3	0
565	125.5	0
566	125.6	1.88
567	125.7	24.62
568	125.8	64.27
569	125.9	74.18
570	126	30.93
571	126.1	0
572	126.3	0
573	126.4	36.28
574	126.5	52.63
575	126.6	26.17
576	126.7	0
577	126.9	0
578	127	20.85
579	127.1	83.91
580	127.2	130.79
581	127.3	141.72
582	127.4	105.67
583	127.5	51.41
584	127.6	2.75
585	127.7	0
586	127.8	4.84
587	127.9	10.06
588	128	0
589	128.3	0
590	128.4	4.67
591	128.5	32.02
592	128.6	25.29
593	128.7	0
594	129	0
595	129.1	38.77
596	129.2	36.61
597	129.3	0
598	129.4	0
599	129.5	30.99
600	129.6	365.98
601	129.7	719.07
602	129.8	938.11
603	129.9	1035.29
604	130	1106.24
605	130.1	1193.38
606	130.2	1238.35
607	130.3	1126.29
608	130.4	840.01
609	130.5	480.77
610	130.6	234.91
611	130.7	199.7
612	130.8	343.53
613	130.9	524.91
614	131	594.55
615	131.1	539.51
616	131.2	472.11
617	131.3	438.97
618	131.4	352.79
619	131.5	168.02
620	131.6	0
621	131.9	0
622	132	18.12
623	132.1	42.77
624	132.2	29.13
625	132.3	4.06
626	132.4	0
627	132.5	7.27
628	132.6	56.86
629	132.7	115.75
630	132.8	115.43
631	132.9	43.09
632	133	5.59
633	133.1	106.67
634	133.2	280.88
635	133.3	352.58
636	133.4	242.23
637	133.5	85.56
638	133.6	0
639	133.9	0
640	134	4.66
641	134.1	0
642	134.5	0
643	134.6	110.04
644	134.7	170.38
645	134.8	107.13
646	134.9	0
647	135.1	0
648	135.2	147.75
649	135.3	242.9
650	135.4	220.83
651	135.5	133.16
652	135.6	80.18
653	135.7	46.87
654	135.8	34.93
655	135.9	47.44
656	136	83.34
657	136.1	156.77
658	136.2	260.27
659	136.3	356.11
660	136.4	362.57
661	136.5	222.78
662	136.6	183.63
663	136.7	549.73
664	136.8	1192.73
665	136.9	1459.96
666	137	986.72
667	137.1	284
668	137.2	50.68
669	137.3	235.57
670	137.4	305.14
671	137.5	111.3
672	137.6	0
673	137.7	0
674	137.8	98.73
675	137.9	158.52
676	138	158.87
677	138.1	70.83
678	138.2	0
679	138.4	0
680	138.5	23.86
681	138.6	126.61
682	138.7	147.75
683	138.8	142.89
684	138.9	134.22
685	139	95.73
686	139.1	17.59
687	139.2	0
688	139.4	0
689	139.5	33.59
690	139.6	98.98
691	139.7	159.81
692	139.8	194.89
693	139.9	176.08
694	140	76.3
695	140.1	0
696	140.4	0
697	140.5	32.7
698	140.6	27.08
699	140.7	0
700	140.8	0
701	140.9	37.79
702	141	107.11
703	141.1	110.84
704	141.2	23.54
705	141.3	0
706	141.5	0
707	141.6	24.3
708	141.7	63.14
709	141.8	0
710	142.1	0
711	142.2	4.73
712	142.3	20.32
713	142.4	46.39
714	142.5	140.45
715	142.6	263.08
716	142.7	332.54
717	142.8	306.67
718	142.9	233.19
719	143	173.17
720	143.1	153.98
721	143.2	162.86
722	143.3	161.54
723	143.4	119.57
724	143.5	50.28
725	143.6	1.62
726	143.7	0
727	143.8	2.43
728	143.9	69.69
729	144	113.75
730	144.1	100.02
731	144.2	50.59
732	144.3	38.84
733	144.4	56.21
734	144.5	18.44
735	144.6	0
736	144.7	0
737	144.8	91.11
738	144.9	311.81
739	145	386.54
740	145.1	322.58
741	145.2	278.29
742	145.3	298.49
743	145.4	280.55
744	145.5	181.85
745	145.6	109.14
746	145.7	73
747	145.8	151.07
748	145.9	163.68
749	146	114.98
750	146.1	55.72
751	146.2	0
752	146.6	0
753	146.7	61.48
754	146.8	153.47
755	146.9	194.15
756	147	190.07
757	147.1	142.82
758	147.2	65.6
759	147.3	0
760	147.4	0
761	147.5	4.84
762	147.6	2.13
763	147.7	0
764	147.8	4.17
765	147.9	37.84
766	148	52.82
767	148.1	34.6
768	148.2	16.47
769	148.3	43.82
770	148.4	87.76
771	148.5	118.22
772	148.6	189.94
773	148.7	391.5
774	148.8	655.19
775	148.9	783.56
776	149	715.31
777	149.1	581.19
778	149.2	487.81
779	149.3	375.68
780	149.4	193.03
781	149.5	57.75
782	149.6	45.3
783	149.7	97.05
784	149.8	132.27
785	149.9	99.62
786	150	33.07
787	150.1	0
788	150.3	0
789	150.4	29.98
790	150.5	41.3
791	150.6	38.64
792	150.7	64.87
793	150.8	137.34
794	150.9	194.47
795	151	178.1
796	151.1	99.72
797	151.2	29.35
798	151.3	12.6
799	151.4	17.67
800	151.5	49.06
801	151.6	98.14
802	151.7	134.56
803	151.8	129.04
804	151.9	82.07
805	152	18.72
806	152.1	0
807	152.3	0
808	152.4	6.25
809	152.5	41.47
810	152.6	106.53
811	152.7	233.72
812	152.8	369.53
813	152.9	405.84
814	153	293.6
815	153.1	120.06
816	153.2	23.19
817	153.3	43.05
818	153.4	100.18
819	153.5	119.38
820	153.6	92.85
821	153.7	59.54
822	153.8	126
823	153.9	173.85
824	154	161.38
825	154.1	102.2
826	154.2	46.87
827	154.3	1.34
828	154.4	0
829	154.5	0
830	154.6	40.33
831	154.7	178.05
832	154.8	251.01
833	154.9	239.57
834	155	220.3
835	155.1	239.36
836	155.2	227.62
837	155.3	154.63
838	155.4	54.49
839	155.5	5.64
840	155.6	0
841	156.3	0
842	156.4	68.31
843	156.5	219.9
844	156.6	310.03
845	156.7	282.98
846	156.8	240.18
847	156.9	267.84
848	157	316.4
849	157.1	301.45
850	157.2	200.3
851	157.3	29.87
852	157.4	0
853	158.1	0
854	158.2	51.47
855	158.3	56.72
856	158.4	0
857	158.6	0
858	158.7	48.49
859	158.8	111.94
860	158.9	106.69
861	159	90.21
862	159.1	123.26
863	159.2	173.42
864	159.3	179.41
865	159.4	119.58
866	159.5	49.68
867	159.6	0
868	160.2	0
869	160.3	14.47
870	160.4	70.36
871	160.5	96.07
872	160.6	42.13
873	160.7	5.85
874	160.8	101.59
875	160.9	288.02
876	161	409.84
877	161.1	397.78
878	161.2	304.63
879	161.3	182.46
880	161.4	51.64
881	161.5	0
882	161.8	0
883	161.9	36.72
884	162	52.48
885	162.1	31.95
886	162.2	9.6
887	162.3	11.66
888	162.4	29.24
889	162.5	13.29
890	162.6	0
891	162.7	0
892	162.8	36.03
893	162.9	137.18
894	163	162.15
895	163.1	93.73
896	163.2	17.95
897	163.3	1.34
898	163.4	9.21
899	163.5	17.26
900	163.6	0
901	163.9	0
902	164	3.43
903	164.1	20.67
904	164.2	22.36
905	164.3	26.55
906	164.4	35.94
907	164.5	48.8
908	164.6	49.59
909	164.7	33.06
910	164.8	12.07
911	164.9	4.02
912	165	22.56
913	165.1	53.53
914	165.2	72.65
915	165.3	62.28
916	165.4	32.6
917	165.5	11.35
918	165.6	13.4
919	165.7	21.9
920	165.8	26.06
921	165.9	22.51
922	166	14.71
923	166.1	7.68
924	166.2	4.67
925	166.3	5.98
926	166.4	12.78
927	166.5	30.4
928	166.6	62.54
929	166.7	90.39
930	166.8	91.55
931	166.9	66.61
932	167	37.75
933	167.1	23.22
934	167.2	22.15
935	167.3	23.99
936	167.4	29.79
937	167.5	31.66
938	167.6	26.54
939	167.7	16.16
940	167.8	1.76
941	167.9	0
942	168.3	0
943	168.4	29.18
944	168.5	65.07
945	168.6	86.41
946	168.7	76.27
947	168.8	37.85
948	168.9	0
949	169	0
950	169.1	6.83
951	169.2	21.74
952	169.3	17.89
953	169.4	6.87
954	169.5	0
955	170	0
956	170.1	36.13
957	170.2	48.18
958	170.3	46.71
959	170.4	73.48
960	170.5	250.83
961	170.6	606.15
962	170.7	1045.27
963	170.8	1403.65
964	170.9	1567.68
965	171	1561.6
966	171.1	1494.4
967	171.2	1408.8
968	171.3	1221.25
969	171.4	858.67
970	171.5	411.58
971	171.6	88.5
972	171.7	0
973	171.8	42.19
974	171.9	159.34
975	172	303.75
976	172.1	388.24
977	172.2	322.24
978	172.3	134.57
979	172.4	0
980	173.9	0
981	174	81.86
982	174.1	154.02
983	174.2	138.59
984	174.3	54.53
985	174.4	0
986	174.9	0
987	175	92.77
988	175.1	84.95
989	175.2	0
990	175.8	0
991	175.9	38.48
992	176	45.78
993	176.1	24.95
994	176.2	23.39
995	176.3	71.69
996	176.4	122.81
997	176.5	101.52
998	176.6	29.42
999	176.7	0
1000	176.8	3.35
1001	176.9	0
1002	177.4	0
1003	177.5	26.89
1004	177.6	105.28
1005	177.7	113.18
1006	177.8	60.21
1007	177.9	29.16
1008	178	102.33
1009	178.1	224.64
1010	178.2	278.15
1011	178.3	232.5
1012	178.4	143.26
1013	178.5	82.92
1014	178.6	64.33
1015	178.7	50.53
1016	178.8	22.56
1017	178.9	0
1018	179.4	0
1019	179.5	8.32
1020	179.6	23.18
1021	179.7	20.77
1022	179.8	0
1023	180	0
1024	180.1	23.86
1025	180.2	47.35
1026	180.3	44.68
1027	180.4	21.61
1028	180.5	0
1029	180.8	0
1030	180.9	0.31
1031	181	41.86
1032	181.1	59.94
1033	181.2	42.13
1034	181.3	10.39
1035	181.4	0
1036	181.6	0
1037	181.7	12.22
1038	181.8	34.24
1039	181.9	40.18
1040	182	25.8
1041	182.1	18.6
1042	182.2	42.81
1043	182.3	96.68
1044	182.4	139.95
1045	182.5	116.3
1046	182.6	3.29
1047	182.7	0
1048	182.9	0
1049	183	113.33
1050	183.1	232.98
1051	183.2	221.03
1052	183.3	131.85
1053	183.4	51.03
1054	183.5	12.76
1055	183.6	32.92
1056	183.7	57.99
1057	183.8	52.61
1058	183.9	15.74
1059	184	0
1060	184.6	0
1061	184.7	71.76
1062	184.8	224.53
1063	184.9	285.37
1064	185	191.31
1065	185.1	13.37
1066	185.2	0
1067	185.6	0
1068	185.7	7.96
1069	185.8	73.49
1070	185.9	112.73
1071	186	97.22
1072	186.1	45.92
1073	186.2	0.92
1074	186.3	0
1075	186.6	0
1076	186.7	33.71
1077	186.8	102.18
1078	186.9	146.87
1079	187	148.69
1080	187.1	122.76
1081	187.2	80.08
1082	187.3	31.12
1083	187.4	0.48
1084	187.5	0
1085	187.6	3.17
1086	187.7	0
1087	187.8	0
1088	187.9	3.45
1089	188	28.6
1090	188.1	38.7
1091	188.2	18.87
1092	188.3	0
1093	189.1	0
1094	189.2	9.24
1095	189.3	59.63
1096	189.4	81.4
1097	189.5	66.09
1098	189.6	70.55
1099	189.7	99.11
1100	189.8	108.04
1101	189.9	42.71
1102	190	0
1103	190.6	0
1104	190.7	4.52
1105	190.8	0
1106	191.5	0
1107	191.6	53.6
1108	191.7	72.61
1109	191.8	45.06
1110	191.9	24.63
1111	192	20.41
1112	192.1	21.62
1113	192.2	20.91
1114	192.3	12.92
1115	192.4	0
1116	194.1	0
1117	194.2	9.6
1118	194.3	50.6
1119	194.4	104.5
1120	194.5	182.1
1121	194.6	251.98
1122	194.7	265.5
1123	194.8	243.59
1124	194.9	206.16
1125	195	156.75
1126	195.1	95.7
1127	195.2	35.84
1128	195.3	0
1129	196	0
1130	196.1	2.76
1131	196.2	9.8
1132	196.3	8.38
1133	196.4	0
1134	196.9	0
1135	197	87.09
1136	197.1	185.22
1137	197.2	187.34
1138	197.3	106.57
1139	197.4	19.51
1140	197.5	0
1141	197.6	0
1142	197.7	39.09
1143	197.8	74.62
1144	197.9	88.94
1145	198	87.22
1146	198.1	81.15
1147	198.2	70.94
1148	198.3	50.67
1149	198.4	12.97
1150	198.5	0
1151	198.6	0
1152	198.7	22.82
1153	198.8	107.51
1154	198.9	151.39
1155	199	99.56
1156	199.1	0
1157	199.4	0
1158	199.5	16.09
1159	199.6	51.36
1160	199.7	50.83
1161	199.8	13.31
1162	199.9	0
1163	201.1	0
1164	201.2	35.92
1165	201.3	96.04
1166	201.4	57.87
1167	201.5	0
1168	202.4	0
1169	202.5	3.34
1170	202.6	27.82
1171	202.7	61.12
1172	202.8	82.14
1173	202.9	78.39
1174	203	60.91
1175	203.1	47.85
1176	203.2	44.72
1177	203.3	34.06
1178	203.4	2.93
1179	203.5	0
1180	203.6	0
1181	203.7	7.79
1182	203.8	2.74
1183	203.9	0
1184	204.6	0
1185	204.7	75.59
1186	204.8	190.77
1187	204.9	320.8
1188	205	474.78
1189	205.1	602.64
1190	205.2	615.58
1191	205.3	476.99
1192	205.4	239.48
1193	205.5	13.56
1194	205.6	0
1195	206.1	0
1196	206.2	36.31
1197	206.3	81.92
1198	206.4	73.55
1199	206.5	19.06
1200	206.6	0
1201	206.8	0
1202	206.9	120.9
1203	207	382.39
1204	207.1	560.45
1205	207.2	524.12
1206	207.3	317.49
1207	207.4	122.12
1208	207.5	33.63
1209	207.6	63.61
1210	207.7	36.92
1211	207.8	0
1212	209	0
1213	209.1	1.34
1214	209.2	128.47
1215	209.3	149.58
1216	209.4	78.2
1217	209.5	4.23
1218	209.6	0
1219	210	0
1220	210.1	25.27
1221	210.2	26.68
1222	210.3	11.39
1223	210.4	9.49
1224	210.5	27.69
1225	210.6	48.91
1226	210.7	60.14
1227	210.8	66.78
1228	210.9	83.88
1229	211	104.19
1230	211.1	95.91
1231	211.2	54.7
1232	211.3	6.01
1233	211.4	0
1234	211.5	0
1235	211.6	18.34
1236	211.7	33.68
1237	211.8	23.6
1238	211.9	0
1239	212.9	0
1240	213	24.46
1241	213.1	22.73
1242	213.2	0
1243	213.8	0
1244	213.9	20.79
1245	214	42.44
1246	214.1	23.86
1247	214.2	0
1248	214.3	0
1249	214.4	8.44
1250	214.5	55.04
1251	214.6	62.21
1252	214.7	20.4
1253	214.8	0
1254	214.9	40.6
1255	215	104
1256	215.1	95.37
1257	215.2	11.21
1258	215.3	0
1259	215.4	0
1260	215.5	20.68
1261	215.6	101.87
1262	215.7	130.73
1263	215.8	88.84
1264	215.9	19.57
1265	216	0
1266	217	0
1267	217.1	6.54
1268	217.2	6.02
1269	217.3	15.24
1270	217.4	10.84
1271	217.5	0
1272	218.1	0
1273	218.2	61.2
1274	218.3	69.9
1275	218.4	13.59
1276	218.5	0
1277	219	0
1278	219.1	1.63
1279	219.2	16.86
1280	219.3	16.99
1281	219.4	29.89
1282	219.5	66.23
1283	219.6	92.6
1284	219.7	59.49
1285	219.8	0
1286	220.5	0
1287	220.6	70.43
1288	220.7	261.95
1289	220.8	376.95
1290	220.9	347.35
1291	221	280.35
1292	221.1	333.04
1293	221.2	466.06
1294	221.3	477.77
1295	221.4	310.04
1296	221.5	116.49
1297	221.6	79.21
1298	221.7	53.05
1299	221.8	5.12
1300	221.9	0
1301	222	0
1302	222.1	30.59
1303	222.2	119.29
1304	222.3	153.31
1305	222.4	50.86
1306	222.5	0
1307	222.6	2.17
1308	222.7	455.96
1309	222.8	1065.68
1310	222.9	1523.85
1311	223	1697.07
1312	223.1	1584.03
1313	223.2	1234.32
1314	223.3	812.16
1315	223.4	529.9
1316	223.5	425.12
1317	223.6	388.84
1318	223.7	311.01
1319	223.8	81.19
1320	223.9	0
1321	224	0
1322	224.1	51.94
1323	224.2	230.78
1324	224.3	120.19
1325	224.4	0
1326	224.5	0
1327	224.6	133.4
1328	224.7	230.58
1329	224.8	24.59
1330	224.9	0
1331	225	0
1332	225.1	85.93
1333	225.2	215.92
1334	225.3	141.62
1335	225.4	40.4
1336	225.5	32.1
1337	225.6	93.89
1338	225.7	134.27
1339	225.8	145.35
1340	225.9	102.59
1341	226	38.79
1342	226.1	0
1343	226.4	0
1344	226.5	3.49
1345	226.6	43.36
1346	226.7	80.06
1347	226.8	79.36
1348	226.9	47.65
1349	227	11.63
1350	227.1	0
1351	227.4	0
1352	227.5	1.12
1353	227.6	5.7
1354	227.7	3.71
1355	227.8	0
1356	228.6	0
1357	228.7	14.78
1358	228.8	58.02
1359	228.9	52.54
1360	229	0
1361	229.3	0
1362	229.4	18.68
1363	229.5	43.54
1364	229.6	41.03
1365	229.7	21.04
1366	229.8	8.84
1367	229.9	12.86
1368	230	21.54
1369	230.1	19.52
1370	230.2	3.55
1371	230.3	0
1372	230.7	0
1373	230.8	41.75
1374	230.9	164.92
1375	231	108.86
1376	231.1	0
1377	231.4	0
1378	231.5	2.87
1379	231.6	0
1380	231.9	0
1381	232	48.29
1382	232.1	64.51
1383	232.2	24.4
1384	232.3	0
1385	232.4	0
1386	232.5	17.65
1387	232.6	24.98
1388	232.7	7.04
1389	232.8	0
1390	232.9	15.03
1391	233	52.21
1392	233.1	86.39
1393	233.2	96.56
1394	233.3	72.46
1395	233.4	40.36
1396	233.5	15.07
1397	233.6	8.9
1398	233.7	22.31
1399	233.8	33.63
1400	233.9	23.11
1401	234	0
1402	234.2	0
1403	234.3	38.03
1404	234.4	116.6
1405	234.5	188.53
1406	234.6	205.24
1407	234.7	136.4
1408	234.8	26.49
1409	234.9	0
1410	235.9	0
1411	236	38.51
1412	236.1	74.16
1413	236.2	81.58
1414	236.3	70.97
1415	236.4	67.71
1416	236.5	36.21
1417	236.6	0
1418	236.9	0
1419	237	151.57
1420	237.1	241.99
1421	237.2	175.92
1422	237.3	34.27
1423	237.4	0
1424	237.5	12.54
1425	237.6	42.21
1426	237.7	18.87
1427	237.8	0
1428	238.2	0
1429	238.3	4.77
1430	238.4	28.05
1431	238.5	53.69
1432	238.6	70.88
1433	238.7	67.02
1434	238.8	56.75
1435	238.9	56.47
1436	239	73.31
1437	239.1	100.96
1438	239.2	115.73
1439	239.3	99.4
1440	239.4	52.3
1441	239.5	3.72
1442	239.6	0
1443	239.7	0.57
1444	239.8	19.71
1445	239.9	23.7
1446	240	14.7
1447	240.1	3.14
1448	240.2	0
1449	240.4	0
1450	240.5	9.14
1451	240.6	20.12
1452	240.7	35.43
1453	240.8	55.44
1454	240.9	84.28
1455	241	104.69
1456	241.1	94.2
1457	241.2	55.65
1458	241.3	18.97
1459	241.4	1.57
1460	241.5	11.35
1461	241.6	24.17
1462	241.7	33.5
1463	241.8	32.26
1464	241.9	23.13
1465	242	8.59
1466	242.1	0
1467	242.4	0
1468	242.5	9.37
1469	242.6	39.57
1470	242.7	74.69
1471	242.8	97.08
1472	242.9	91.34
1473	243	60.03
1474	243.1	23.57
1475	243.2	1.48
1476	243.3	0
1477	243.4	0
1478	243.5	7.06
1479	243.6	11.47
1480	243.7	10.84
1481	243.8	14.06
1482	243.9	29.16
1483	244	48.72
1484	244.1	56.15
1485	244.2	47.82
1486	244.3	44.19
1487	244.4	50.63
1488	244.5	48.64
1489	244.6	36.07
1490	244.7	30.25
1491	244.8	26.82
1492	244.9	0
1493	245.3	0
1494	245.4	7.57
1495	245.5	2.29
1496	245.6	0
1497	245.9	0
1498	246	35.89
1499	246.1	58.01
1500	246.2	37.16
1501	246.3	2.4
1502	246.4	0
1503	246.5	0
1504	246.6	2.36
1505	246.7	0
1506	247.1	0
1507	247.2	11.98
1508	247.3	79.34
1509	247.4	83.73
1510	247.5	37
1511	247.6	6.5
1512	247.7	39.42
1513	247.8	104.5
1514	247.9	127.26
1515	248	75.99
1516	248.1	0
1517	248.4	0
1518	248.5	18.02
1519	248.6	42.34
1520	248.7	41.46
1521	248.8	48.63
1522	248.9	78.02
1523	249	92.77
1524	249.1	62.41
1525	249.2	12.03
1526	249.3	0
1527	249.4	0
1528	249.5	10.22
1529	249.6	17.12
1530	249.7	13.55
1531	249.8	9.54
1532	249.9	5.98
1533	250	0
1534	250.4	0
1535	250.5	6.77
1536	250.6	9.89
1537	250.7	15.29
1538	250.8	34.44
1539	250.9	54.28
1540	251	55.54
1541	251.1	40.54
1542	251.2	30.24
1543	251.3	28.87
1544	251.4	28.02
1545	251.5	28.72
1546	251.6	32.62
1547	251.7	39.4
1548	251.8	41.77
1549	251.9	34.34
1550	252	18.91
1551	252.1	3.54
1552	252.2	0
1553	252.3	0
1554	252.4	17.05
1555	252.5	40.23
1556	252.6	64.16
1557	252.7	84.85
1558	252.8	88.31
1559	252.9	57.83
1560	253	0.85
1561	253.1	0
1562	253.3	0
1563	253.4	14.36
1564	253.5	13.2
1565	253.6	3.83
1566	253.7	0
1567	254.3	0
1568	254.4	2.61
1569	254.5	0.11
1570	254.6	0
1571	254.8	0
1572	254.9	13.38
1573	255	27.11
1574	255.1	16.88
1575	255.2	0
1576	255.4	0
1577	255.5	8.56
1578	255.6	9.34
1579	255.7	4.55
1580	255.8	21.69
1581	255.9	81.02
1582	256	143.85
1583	256.1	154.64
1584	256.2	103.49
1585	256.3	34.12
1586	256.4	0
1587	256.5	0
1588	256.6	2.07
1589	256.7	16.01
1590	256.8	13.88
1591	256.9	0
1592	258.1	0
1593	258.2	3.29
1594	258.3	4.4
1595	258.4	0
1596	259.5	0
1597	259.6	0.67
1598	259.7	2.47
1599	259.8	3.94
1600	259.9	3.29
1601	260	0.03
1602	260.1	0
1603	260.2	0
1604	260.3	3.57
1605	260.4	14.85
1606	260.5	27.54
1607	260.6	38.55
1608	260.7	43.6
1609	260.8	44.23
1610	260.9	49.74
1611	261	75.55
1612	261.1	104.21
1613	261.2	103.55
1614	261.3	68.93
1615	261.4	34.9
1616	261.5	27.81
1617	261.6	17.07
1618	261.7	0
1619	263.3	0
1620	263.4	2.12
1621	263.5	4.81
1622	263.6	1.83
1623	263.7	0
1624	264.4	0
1625	264.5	7.39
1626	264.6	16.77
1627	264.7	22.13
1628	264.8	15.66
1629	264.9	0
1630	265.4	0
1631	265.5	8.57
1632	265.6	16.31
1633	265.7	8.17
1634	265.8	0
1635	266.1	0
1636	266.2	13.14
1637	266.3	32.74
1638	266.4	38.67
1639	266.5	23.95
1640	266.6	0
1641	267.7	0
1642	267.8	13
1643	267.9	21.64
1644	268	12.83
1645	268.1	2.85
1646	268.2	0.01
1647	268.3	3.52
1648	268.4	10.62
1649	268.5	21.49
1650	268.6	29.49
1651	268.7	25.3
1652	268.8	6.84
1653	268.9	0
1654	269.3	0
1655	269.4	8.44
1656	269.5	7.83
1657	269.6	0
1658	269.8	0
1659	269.9	12.51
1660	270	18.66
1661	270.1	10.9
1662	270.2	1.33
1663	270.3	7.06
1664	270.4	22.49
1665	270.5	24.65
1666	270.6	0
1667	270.9	0
1668	271	2.41
1669	271.1	3.31
1670	271.2	10.27
1671	271.3	11.8
1672	271.4	0
1673	272.7	0
1674	272.8	3.52
1675	272.9	4.02
1676	273	0
1677	273.5	0
1678	273.6	7.19
1679	273.7	21.51
1680	273.8	35.6
1681	273.9	36.18
1682	274	19.9
1683	274.1	0
1684	274.8	0
1685	274.9	4.12
1686	275	0
1687	275.7	0
1688	275.8	19.94
1689	275.9	20.04
1690	276	0
1691	277.6	0
1692	277.7	5.58
1693	277.8	5.08
1694	277.9	0
1695	278.4	0
1696	278.5	7.62
1697	278.6	14.86
1698	278.7	11.59
1699	278.8	15.11
1700	278.9	34.79
1701	279	51.19
1702	279.1	43.47
1703	279.2	21.26
1704	279.3	0.49
1705	279.4	0
1706	279.7	0
1707	279.8	3.71
1708	279.9	29.27
1709	280	48.75
1710	280.1	48.79
1711	280.2	5.25
1712	280.3	0
1713	280.6	0
1714	280.7	123.74
1715	280.8	310.92
1716	280.9	379.39
1717	281	309.86
1718	281.1	214.71
1719	281.2	184.56
1720	281.3	170.11
1721	281.4	93.1
1722	281.5	3.07
1723	281.6	0
1724	281.7	34.71
1725	281.8	77.22
1726	281.9	63.84
1727	282	32.68
1728	282.1	26.27
1729	282.2	49.26
1730	282.3	68.32
1731	282.4	85.34
1732	282.5	86.13
1733	282.6	52.54
1734	282.7	13.19
1735	282.8	20.61
1736	282.9	103.72
1737	283	190.96
1738	283.1	204.14
1739	283.2	149.47
1740	283.3	83.69
1741	283.4	35.08
1742	283.5	0
1743	283.7	0
1744	283.8	16.25
1745	283.9	57.86
1746	284	61.24
1747	284.1	36.99
1748	284.2	13.52
1749	284.3	11.96
1750	284.4	24.2
1751	284.5	22.01
1752	284.6	0
1753	285.1	0
1754	285.2	6.04
1755	285.3	4.51
1756	285.4	0.91
1757	285.5	0
1758	285.7	0
1759	285.8	3.67
1760	285.9	20.95
1761	286	43.83
1762	286.1	57.16
1763	286.2	53.03
1764	286.3	41.59
1765	286.4	39.43
1766	286.5	45.51
1767	286.6	37.56
1768	286.7	19.32
1769	286.8	12.26
1770	286.9	28.39
1771	287	53.19
1772	287.1	68.09
1773	287.2	62.72
1774	287.3	40.36
1775	287.4	16.47
1776	287.5	0
1777	288	0
1778	288.1	1.72
1779	288.2	5.83
1780	288.3	10.66
1781	288.4	9.32
1782	288.5	0
1783	288.7	0
1784	288.8	19.43
1785	288.9	69.56
1786	289	90.11
1787	289.1	69
1788	289.2	32.96
1789	289.3	12.59
1790	289.4	1.34
1791	289.5	0
1792	289.9	0
1793	290	2.4
1794	290.1	9.91
1795	290.2	9.61
1796	290.3	4.36
1797	290.4	0
1798	290.5	0
1799	290.6	3.74
1800	290.7	14.66
1801	290.8	14.57
1802	290.9	0
1803	291.1	0
1804	291.2	5.26
1805	291.3	24.09
1806	291.4	34.96
1807	291.5	38.17
1808	291.6	44.34
1809	291.7	55.86
1810	291.8	51.76
1811	291.9	27.08
1812	292	8.54
1813	292.1	7.24
1814	292.2	19.51
1815	292.3	18.03
1816	292.4	47.45
1817	292.5	119.48
1818	292.6	180.64
1819	292.7	169.79
1820	292.8	93.81
1821	292.9	17.31
1822	293	0
1823	293.7	0
1824	293.8	0.16
1825	293.9	1.64
1826	294	2.49
1827	294.1	3.23
1828	294.2	3.64
1829	294.3	1.72
1830	294.4	0
1831	294.6	0
1832	294.7	0.08
1833	294.8	7.07
1834	294.9	12.36
1835	295	17.5
1836	295.1	20.87
1837	295.2	18.88
1838	295.3	13.56
1839	295.4	10.23
1840	295.5	8.12
1841	295.6	1.4
1842	295.7	0
1843	295.8	0
1844	295.9	16.16
1845	296	49.5
1846	296.1	81.69
1847	296.2	70.24
1848	296.3	0
1849	296.4	0
1850	296.5	94.65
1851	296.6	589.65
1852	296.7	1175.67
1853	296.8	1641.58
1854	296.9	1866.32
1855	297	1751.35
1856	297.1	1283.59
1857	297.2	674.31
1858	297.3	213.82
1859	297.4	0
1860	297.7	0
1861	297.8	152.41
1862	297.9	408.18
1863	298	474.94
1864	298.1	349.8
1865	298.2	174.09
1866	298.3	94.27
1867	298.4	160.06
1868	298.5	299.25
1869	298.6	416.83
1870	298.7	463.37
1871	298.8	387.02
1872	298.9	251.77
1873	299	171.5
1874	299.1	185.39
1875	299.2	207.55
1876	299.3	156.23
1877	299.4	74.15
1878	299.5	24.6
1879	299.6	1.73
1880	299.7	21.57
1881	299.8	43.46
1882	299.9	89.12
1883	300	164.37
1884	300.1	226.52
1885	300.2	222.39
1886	300.3	153.14
1887	300.4	81.09
1888	300.5	42.34
1889	300.6	66
1890	300.7	98.38
1891	300.8	105.13
1892	300.9	72.26
1893	301	17.64
1894	301.1	0
1895	301.7	0
1896	301.8	15.13
1897	301.9	28.25
1898	302	36.72
1899	302.1	46.87
1900	302.2	55.16
1901	302.3	50.12
1902	302.4	32.64
1903	302.5	19.58
1904	302.6	19.1
1905	302.7	17.36
1906	302.8	7.45
1907	302.9	0
1908	304.1	0
1909	304.2	7.79
1910	304.3	17.05
1911	304.4	17.75
1912	304.5	13.35
1913	304.6	16.03
1914	304.7	31.4
1915	304.8	51.75
1916	304.9	64.59
1917	305	64.13
1918	305.1	54.84
1919	305.2	44.82
1920	305.3	35.7
1921	305.4	23.66
1922	305.5	8.6
1923	305.6	0
1924	305.8	0
1925	305.9	0.36
1926	306	20.98
1927	306.1	33.23
1928	306.2	24.68
1929	306.3	5.72
1930	306.4	0
1931	306.5	4.21
1932	306.6	16.95
1933	306.7	23.39
1934	306.8	21.17
1935	306.9	21.44
1936	307	27.5
1937	307.1	36.58
1938	307.2	39.9
1939	307.3	33.01
1940	307.4	19.5
1941	307.5	3.84
1942	307.6	0
1943	307.8	0
1944	307.9	12.51
1945	308	25.28
1946	308.1	32.71
1947	308.2	32.04
1948	308.3	23.69
1949	308.4	11.73
1950	308.5	2.97
1951	308.6	0
1952	309.2	0
1953	309.3	1.82
1954	309.4	7.38
1955	309.5	9.72
1956	309.6	10.81
1957	309.7	11.13
1958	309.8	9.55
1959	309.9	7.19
1960	310	4.82
1961	310.1	0.99
1962	310.2	0
1963	310.4	0
1964	310.5	9.71
1965	310.6	21.73
1966	310.7	26.96
1967	310.8	20.37
1968	310.9	7.49
1969	311	0
1970	311.3	0
1971	311.4	0.02
1972	311.5	0.4
1973	311.6	0
1974	311.8	0
1975	311.9	4.31
1976	312	8.52
1977	312.1	7.23
1978	312.2	2.16
1979	312.3	0
1980	312.4	0.87
1981	312.5	8.99
1982	312.6	24.92
1983	312.7	42.18
1984	312.8	52.48
1985	312.9	55.39
1986	313	54.85
1987	313.1	48.41
1988	313.2	32.38
1989	313.3	14.34
1990	313.4	6.59
1991	313.5	7.72
1992	313.6	8.97
1993	313.7	8.27
1994	313.8	9.47
1995	313.9	12.16
1996	314	11.38
1997	314.1	5.42
[truncated: 1,920 more rows]

## Sheet: Sheet5
+ESI Scan (rt: 8.12-8.46 min, 74 scans) Frag=100.0V CF=0.000 DF=0.000 4608-01.d Subtract
Index	X	Y
0	50	0
1	50.6	0
2	50.7	0.05
3	50.8	0.18
4	50.9	0.29
5	51	0.32
6	51.1	0.3
7	51.2	0.25
8	51.3	0.18
9	51.4	0.08
10	51.5	0
11	51.6	0
12	51.7	0.01
13	51.8	0.04
14	51.9	0.01
15	52	0
16	52.2	0
17	52.3	0.08
18	52.4	0.22
19	52.5	0.18
20	52.6	0
21	53.6	0
22	53.7	0.1
23	53.8	0.2
24	53.9	0
25	54.5	0
26	54.6	6.32
27	54.7	39.18
28	54.8	65.07
29	54.9	61.74
30	55	20.24
31	55.1	0
32	56.2	0
33	56.3	5.69
34	56.4	20.42
35	56.5	18.11
36	56.6	5.07
37	56.7	0
38	56.9	0
39	57	35.26
40	57.1	49.54
41	57.2	0
42	57.5	0
43	57.6	10.83
44	57.7	0
45	58.1	0
46	58.2	11.6
47	58.3	57.74
48	58.4	82.05
49	58.5	125.27
50	58.6	298.15
51	58.7	361.59
52	58.8	151.08
53	58.9	0
54	59.8	0
55	59.9	120.92
56	60	193.81
57	60.1	149.11
58	60.2	84.66
59	60.3	51.1
60	60.4	36.62
61	60.5	0
62	60.6	0
63	60.7	198.08
64	60.8	667.13
65	60.9	1048.72
66	61	931.87
67	61.1	369.24
68	61.2	0
69	61.7	0
70	61.8	5.91
71	61.9	0
72	62.4	0
73	62.5	9.52
74	62.6	7.91
75	62.7	0
76	63.5	0
77	63.6	4.49
78	63.7	20.13
79	63.8	39.4
80	63.9	44.36
81	64	33.08
82	64.1	30.13
83	64.2	49.37
84	64.3	67.12
85	64.4	55.88
86	64.5	21.91
87	64.6	0
88	65.1	0
89	65.2	0.02
90	65.3	0
91	65.4	0
92	65.5	0.46
93	65.6	0.83
94	65.7	0.84
95	65.8	0.63
96	65.9	0.37
97	66	0.09
98	66.1	0
99	66.2	0.05
100	66.3	0.24
101	66.4	0.14
102	66.5	0
103	67	0
104	67.1	1.43
105	67.2	6.07
106	67.3	7.45
107	67.4	3.7
108	67.5	0
109	67.8	0
110	67.9	1.85
111	68	2.27
112	68.1	0.67
113	68.2	0
114	68.3	0
115	68.4	2.45
116	68.5	8.84
117	68.6	14.49
118	68.7	7.45
119	68.8	0
120	69.1	0
121	69.2	45.72
122	69.3	114.33
123	69.4	119.35
124	69.5	74.98
125	69.6	13.38
126	69.7	0
127	70.1	0
128	70.2	3.2
129	70.3	25.41
130	70.4	35.21
131	70.5	33.69
132	70.6	0
133	71.2	0
134	71.3	115.27
135	71.4	192.79
136	71.5	148.45
137	71.6	55.77
138	71.7	0
139	71.9	0
140	72	18.63
141	72.1	52.67
142	72.2	72.87
143	72.3	75.2
144	72.4	61.94
145	72.5	31.12
146	72.6	0
147	72.8	0
148	72.9	251.2
149	73	436.33
150	73.1	342.95
151	73.2	96.99
152	73.3	31.12
153	73.4	240.79
154	73.5	454.39
155	73.6	423.01
156	73.7	230.22
157	73.8	0
158	73.9	0
159	74	47.24
160	74.1	106.32
161	74.2	140.78
162	74.3	127.65
163	74.4	96.92
164	74.5	81.76
165	74.6	66.02
166	74.7	21.98
167	74.8	0
168	75.5	0
169	75.6	46.85
170	75.7	40.73
171	75.8	40.98
172	75.9	41.94
173	76	37.25
174	76.1	28.75
175	76.2	22.39
176	76.3	19.08
177	76.4	6.52
178	76.5	0
179	76.7	0
180	76.8	1.36
181	76.9	84.43
182	77	135.97
183	77.1	116.85
184	77.2	64.29
185	77.3	53.6
186	77.4	105.71
187	77.5	156.28
188	77.6	162.43
189	77.7	86.51
190	77.8	0
191	77.9	5.63
192	78	121.92
193	78.1	219.45
194	78.2	187.13
195	78.3	76.57
196	78.4	13.23
197	78.5	15.37
198	78.6	2.45
199	78.7	0
200	79	0
201	79.1	37.6
202	79.2	62.17
203	79.3	39.31
204	79.4	10.62
205	79.5	4.71
206	79.6	12
207	79.7	21.21
208	79.8	28.17
209	79.9	32.04
210	80	36.38
211	80.1	39.16
212	80.2	38.01
213	80.3	30.14
214	80.4	19.4
215	80.5	8.6
216	80.6	0
217	81.9	0
218	82	3.28
219	82.1	22.67
220	82.2	30.61
221	82.3	11.48
222	82.4	0
223	82.9	0
224	83	5.31
225	83.1	0
226	83.6	0
227	83.7	28.25
228	83.8	62.32
229	83.9	66.44
230	84	45.17
231	84.1	2.44
232	84.2	0
233	84.6	0
234	84.7	1.16
235	84.8	61.52
236	84.9	86.98
237	85	51.11
238	85.1	0
239	85.2	0
240	85.3	3.19
241	85.4	32.22
242	85.5	32.18
243	85.6	12.65
244	85.7	0
245	86.4	0
246	86.5	30.9
247	86.6	72.6
248	86.7	74.8
249	86.8	23.28
250	86.9	0
251	87.1	0
252	87.2	100.47
253	87.3	150.5
254	87.4	100.12
255	87.5	11.22
256	87.6	0
257	87.7	0
258	87.8	14.62
259	87.9	41.27
260	88	71.88
261	88.1	91.84
262	88.2	49.75
263	88.3	0
264	89	0
265	89.1	328.63
266	89.2	600.24
267	89.3	615.48
268	89.4	397.33
269	89.5	173.63
270	89.6	117.23
271	89.7	173.64
272	89.8	38.22
273	89.9	159.91
274	90	264.18
275	90.1	395.69
276	90.2	377.61
277	90.3	192.93
278	90.4	0
279	90.6	0
280	90.7	29.52
281	90.8	54.36
282	90.9	26.61
283	91	0
284	91.4	0
285	91.5	25.82
286	91.6	36.38
287	91.7	23.8
288	91.8	4.26
289	91.9	2.9
290	92	1.87
291	92.1	0
292	92.6	0
293	92.7	7.29
294	92.8	16.23
295	92.9	15.65
296	93	0
297	93.2	0
298	93.3	7.98
299	93.4	41.07
300	93.5	40.72
301	93.6	13.31
302	93.7	0
303	93.9	0
304	94	2.25
305	94.1	1.63
306	94.2	0
307	95.3	0
308	95.4	20.22
309	95.5	27.29
310	95.6	17.55
311	95.7	6.27
312	95.8	5.26
313	95.9	12.17
314	96	15.76
315	96.1	5.22
316	96.2	0
317	96.4	0
318	96.5	31.1
319	96.6	65.42
320	96.7	67.91
321	96.8	22.5
322	96.9	0
323	97.2	0
324	97.3	7.5
325	97.4	29.27
326	97.5	44.24
327	97.6	19.71
328	97.7	0
329	98	0
330	98.1	1.13
331	98.2	126.12
332	98.3	153.42
333	98.4	72.93
334	98.5	0
335	98.6	0
336	98.7	60.78
337	98.8	64
338	98.9	0
339	99.3	0
340	99.4	61.26
341	99.5	69.39
342	99.6	18.97
343	99.7	34.22
344	99.8	31.54
345	99.9	9.61
346	100	0
347	100.3	0
348	100.4	68.43
349	100.5	232.04
350	100.6	362.41
351	100.7	402.44
352	100.8	288.17
353	100.9	65.15
354	101	0
355	101.5	0
356	101.6	246.81
357	101.7	521.85
358	101.8	683.94
359	101.9	619.92
360	102	392.84
361	102.1	149.94
362	102.2	0
363	102.7	0
364	102.8	70.95
365	102.9	50.99
366	103	0
367	103.1	0
368	103.2	9.9
369	103.3	29.56
370	103.4	0
371	103.6	0
372	103.7	1.5
373	103.8	41.66
374	103.9	99.53
375	104	111.36
376	104.1	66.4
377	104.2	0
378	105.6	0
379	105.7	22.65
380	105.8	34.78
381	105.9	37.32
382	106	23.86
383	106.1	1.13
384	106.2	0
385	106.7	0
386	106.8	1.14
387	106.9	2.25
388	107	0
389	107.6	0
390	107.7	44.71
391	107.8	92.06
392	107.9	59.98
393	108	0
394	108.1	0
395	108.2	41.47
396	108.3	104.75
397	108.4	111.15
398	108.5	61.11
399	108.6	1.13
400	108.7	0
401	109.3	0
402	109.4	6.19
403	109.5	14.11
404	109.6	12.93
405	109.7	16.98
406	109.8	19.48
407	109.9	12.71
408	110	9.25
409	110.1	8.41
410	110.2	3.27
411	110.3	0
412	110.9	0
413	111	58.4
414	111.1	117.39
415	111.2	112.81
416	111.3	80.17
417	111.4	63.53
418	111.5	64.87
419	111.6	53.52
420	111.7	31.48
421	111.8	27.59
422	111.9	35.27
423	112	23.87
424	112.1	0
425	112.3	0
426	112.4	4.73
427	112.5	12.19
428	112.6	0
429	112.8	0
430	112.9	6.51
431	113	34.99
432	113.1	3.68
433	113.2	0
434	113.4	0
435	113.5	106.5
436	113.6	211.01
437	113.7	212.55
438	113.8	122.53
439	113.9	0
440	114.7	0
441	114.8	82.14
442	114.9	260.91
443	115	354.39
444	115.1	317.62
445	115.2	130.11
446	115.3	0
447	115.5	0
448	115.6	28.96
449	115.7	103.99
450	115.8	126.3
451	115.9	86.92
452	116	27.2
453	116.1	0
454	116.2	0
455	116.3	30.15
456	116.4	145.51
457	116.5	200.33
458	116.6	126.65
459	116.7	0
460	117.2	0
461	117.3	39.31
462	117.4	45.19
463	117.5	29.58
464	117.6	18.85
465	117.7	9.73
466	117.8	9.64
467	117.9	1.52
468	118	0
469	119.5	0
470	119.6	0.04
471	119.7	5.33
472	119.8	0
473	120.2	0
474	120.3	38.98
475	120.4	113.59
476	120.5	52.75
477	120.6	0
478	121	0
479	121.1	12.72
480	121.2	216.1
481	121.3	261.08
482	121.4	145.68
483	121.5	40.45
484	121.6	53.92
485	121.7	134.16
486	121.8	137.85
487	121.9	37.88
488	122	0
489	122.1	0
490	122.2	16.94
491	122.3	15.72
492	122.4	0
493	122.5	0
494	122.6	49.04
495	122.7	99.4
496	122.8	62.63
497	122.9	0
498	123.4	0
499	123.5	25.92
500	123.6	30.41
501	123.7	14.01
502	123.8	14.37
503	123.9	26.96
504	124	29.68
505	124.1	17.89
506	124.2	14.04
507	124.3	19.37
508	124.4	8.64
509	124.5	0
510	124.6	0
511	124.7	41.79
512	124.8	76.72
513	124.9	50.43
514	125	0
515	125.1	0
516	125.2	10.5
517	125.3	29.96
518	125.4	7.6
519	125.5	0
520	125.8	0
521	125.9	11.22
522	126	6.82
523	126.1	0.15
524	126.2	1.19
525	126.3	9.64
526	126.4	13.42
527	126.5	0
528	128.7	0
529	128.8	27.98
530	128.9	69.9
531	129	81
532	129.1	105.54
533	129.2	132.36
534	129.3	109.9
535	129.4	43.93
536	129.5	0
537	129.6	0
538	129.7	14.04
539	129.8	17.67
540	129.9	0
541	131.1	0
542	131.2	16.18
543	131.3	83.37
544	131.4	112.68
545	131.5	90.27
546	131.6	32.3
547	131.7	15.73
548	131.8	15.46
549	131.9	9.14
550	132	0
551	132.5	0
552	132.6	40.19
553	132.7	115.94
554	132.8	72.4
555	132.9	0
556	134.1	0
557	134.2	18.73
558	134.3	70.91
559	134.4	130.18
560	134.5	172.48
561	134.6	151.59
562	134.7	74.28
563	134.8	0
564	134.9	0
565	135	76.27
566	135.1	157.35
567	135.2	167.04
568	135.3	107.9
569	135.4	33.05
570	135.5	4.4
571	135.6	18.18
572	135.7	33.27
573	135.8	19.68
574	135.9	0
575	136	0
576	136.1	32.76
577	136.2	127.43
578	136.3	139.18
579	136.4	18.41
580	136.5	0
581	136.6	0
582	136.7	23.03
583	136.8	144.93
584	136.9	214
585	137	279.12
586	137.1	287.78
587	137.2	189.99
588	137.3	107.15
589	137.4	149.68
590	137.5	211.04
591	137.6	143.07
592	137.7	27.59
593	137.8	0
594	137.9	15.51
595	138	0
596	138.8	0
597	138.9	6.43
598	139	26.08
599	139.1	0
600	139.9	0
601	140	19.93
602	140.1	46.46
603	140.2	40.59
604	140.3	9.92
605	140.4	0
606	140.5	24.19
607	140.6	54.35
608	140.7	36.47
609	140.8	0
610	141.1	0
611	141.2	25.93
612	141.3	28.01
613	141.4	0
614	142	0
615	142.1	1.66
616	142.2	107.4
617	142.3	114.89
618	142.4	56.92
619	142.5	15.77
620	142.6	0
621	143.7	0
622	143.8	8.35
623	143.9	38.67
624	144	47.58
625	144.1	50.88
626	144.2	67.21
627	144.3	114.13
628	144.4	151.6
629	144.5	162.97
630	144.6	151.7
631	144.7	90.23
632	144.8	5.81
633	144.9	0
634	145	10.76
635	145.1	72.64
636	145.2	90.94
637	145.3	68
638	145.4	31.35
639	145.5	9.07
640	145.6	0
641	145.7	2.56
642	145.8	53.16
643	145.9	97.36
644	146	113.49
645	146.1	101.69
646	146.2	79.51
647	146.3	47.36
648	146.4	24.77
649	146.5	27.58
650	146.6	42.16
651	146.7	26.23
652	146.8	0
653	147	0
654	147.1	14.55
655	147.2	40.33
656	147.3	48.34
657	147.4	25.21
658	147.5	0
659	147.8	0
660	147.9	31.7
661	148	56.77
662	148.1	58.13
663	148.2	48.77
664	148.3	44.34
665	148.4	63.73
666	148.5	104.76
667	148.6	124.66
668	148.7	87.98
669	148.8	23.83
670	148.9	2.1
671	149	37.25
672	149.1	68.97
673	149.2	56.25
674	149.3	19.5
675	149.4	0
676	150.2	0
677	150.3	8.58
678	150.4	100.09
679	150.5	163.71
680	150.6	128.59
681	150.7	7.09
682	150.8	0
683	151.6	0
684	151.7	22.16
685	151.8	22.85
686	151.9	4.95
687	152	0
688	152.2	0
689	152.3	20.9
690	152.4	31.66
691	152.5	22.51
692	152.6	24.43
693	152.7	81.22
694	152.8	146.11
695	152.9	162.46
696	153	125.04
697	153.1	66.57
698	153.2	11.24
699	153.3	0
700	153.4	21.55
701	153.5	87.93
702	153.6	123.64
703	153.7	89.17
704	153.8	88.81
705	153.9	57.88
706	154	22.76
707	154.1	6.54
708	154.2	0.91
709	154.3	0
710	154.4	0
711	154.5	22.56
712	154.6	50.21
713	154.7	34.62
714	154.8	0
715	155.1	0
716	155.2	31.41
717	155.3	49.99
718	155.4	43.75
719	155.5	38.06
720	155.6	31.61
721	155.7	14.41
722	155.8	0
723	156	0
724	156.1	14.25
725	156.2	17.96
726	156.3	0
727	156.6	0
728	156.7	78.19
729	156.8	147.83
730	156.9	192.07
731	157	205.11
732	157.1	168.32
733	157.2	90.41
734	157.3	16.62
735	157.4	0
736	158.4	0
737	158.5	61.77
738	158.6	90.16
739	158.7	54.47
740	158.8	0
741	159.1	0
742	159.2	12.26
743	159.3	44.55
744	159.4	47.38
745	159.5	21.32
746	159.6	1.99
747	159.7	17.46
748	159.8	41.43
749	159.9	32.29
750	160	0
751	160.4	0
752	160.5	54.13
753	160.6	132.03
754	160.7	78.98
755	160.8	0
756	161.1	0
757	161.2	31.53
758	161.3	17.94
759	161.4	0
760	161.6	0
761	161.7	1.57
762	161.8	9.1
763	161.9	0
764	162.1	0
765	162.2	48.34
766	162.3	245.42
767	162.4	625.07
768	162.5	1193.95
769	162.6	1899.17
770	162.7	2597.17
771	162.8	3078.01
772	162.9	3212.31
773	163	3086.85
774	163.1	2852.34
775	163.2	2478.39
776	163.3	1834.46
777	163.4	1012.97
778	163.5	352.89
779	163.6	88.86
780	163.7	79.96
781	163.8	170.61
782	163.9	229.36
783	164	234.53
784	164.1	205.23
785	164.2	159.85
786	164.3	102.8
787	164.4	46.71
788	164.5	9.39
789	164.6	9.31
790	164.7	46.52
791	164.8	94.5
792	164.9	113.78
793	165	89.14
794	165.1	43.18
795	165.2	9.55
796	165.3	1.5
797	165.4	3.27
798	165.5	0
799	165.7	0
800	165.8	5.35
801	165.9	9.48
802	166	11.37
803	166.1	11.09
804	166.2	8.05
805	166.3	0
806	167.6	0
807	167.7	2.25
808	167.8	5.1
809	167.9	0
810	168.5	0
811	168.6	2.85
812	168.7	6.74
813	168.8	9.34
814	168.9	11.6
815	169	17.91
816	169.1	36.95
817	169.2	64.5
818	169.3	78.94
819	169.4	67.14
820	169.5	42.55
821	169.6	22.27
822	169.7	6.57
823	169.8	0
824	170	0
825	170.1	29.82
826	170.2	74.14
827	170.3	88.19
828	170.4	50.05
829	170.5	6.35
830	170.6	0
831	170.7	27.67
832	170.8	65.7
833	170.9	72.97
834	171	32.21
835	171.1	0
836	171.3	0
837	171.4	45.38
838	171.5	54.37
839	171.6	39.03
840	171.7	23.33
841	171.8	6.1
842	171.9	0
843	172	13.77
844	172.1	44.02
845	172.2	63
846	172.3	52.11
847	172.4	16.56
848	172.5	0
849	172.9	0
850	173	27.58
851	173.1	49.2
852	173.2	55.45
853	173.3	49.82
854	173.4	33.92
855	173.5	6.71
856	173.6	0
857	174.3	0
858	174.4	46.02
859	174.5	111.14
860	174.6	147.14
861	174.7	119.15
862	174.8	39.08
863	174.9	0
864	175	0
865	175.1	26.9
866	175.2	108.14
867	175.3	136.05
868	175.4	102.3
869	175.5	52.26
870	175.6	33.26
871	175.7	31.95
872	175.8	46
873	175.9	57.69
874	176	52.31
875	176.1	33.85
876	176.2	16.3
877	176.3	14.02
878	176.4	0
879	177	0
880	177.1	43.99
881	177.2	96.49
882	177.3	89
883	177.4	32.28
884	177.5	0
885	177.6	32.74
886	177.7	69.92
887	177.8	68.41
888	177.9	38.98
889	178	6.75
890	178.1	0
891	178.3	0
892	178.4	20.32
893	178.5	50.6
894	178.6	68.64
895	178.7	53.92
896	178.8	1.23
897	178.9	0
898	179.3	0
899	179.4	10.1
900	179.5	8.35
901	179.6	17.05
902	179.7	25.15
903	179.8	17.81
904	179.9	9.37
905	180	5.89
906	180.1	5.02
907	180.2	1.17
908	180.3	0
909	181.1	0
910	181.2	8.92
911	181.3	11.79
912	181.4	7.61
913	181.5	0
914	181.9	0
915	182	6.88
916	182.1	15.27
917	182.2	4.15
918	182.3	0
919	183.1	0
920	183.2	1.79
921	183.3	35.9
922	183.4	48.65
923	183.5	45.42
924	183.6	32.97
925	183.7	9.34
926	183.8	0
927	186.2	0
928	186.3	13.61
929	186.4	53.81
930	186.5	78.49
931	186.6	53.09
932	186.7	7.91
933	186.8	0.05
934	186.9	55.37
935	187	130.88
936	187.1	155.85
937	187.2	103.77
938	187.3	25.98
939	187.4	0
940	187.6	0
941	187.7	8.98
942	187.8	24.57
943	187.9	26.75
944	188	19.84
945	188.1	11.83
946	188.2	6.41
947	188.3	6.69
948	188.4	20.58
949	188.5	33.4
950	188.6	28.36
951	188.7	0
952	189	0
953	189.1	23.2
954	189.2	29.3
955	189.3	20.42
956	189.4	10.51
957	189.5	0
958	189.7	0
959	189.8	7.08
960	189.9	48.08
961	190	65.33
962	190.1	42.58
963	190.2	0
964	190.5	0
965	190.6	9.62
966	190.7	77.42
967	190.8	109.65
968	190.9	75.66
969	191	0
970	191.2	0
971	191.3	74.87
972	191.4	124.75
973	191.5	84.28
974	191.6	9.54
975	191.7	0
976	192.4	0
977	192.5	0.83
978	192.6	16.6
979	192.7	16.38
980	192.8	0
981	193.2	0
982	193.3	30.45
983	193.4	72.31
984	193.5	67.91
985	193.6	31.92
986	193.7	0
987	194.1	0
988	194.2	9.61
989	194.3	87.93
990	194.4	147.9
991	194.5	180.79
992	194.6	218.69
993	194.7	273.75
994	194.8	330.41
995	194.9	379.55
996	195	432.25
997	195.1	472.44
998	195.2	444.24
999	195.3	323.46
1000	195.4	169.74
1001	195.5	55.13
1002	195.6	4.58
1003	195.7	0
1004	196	0
1005	196.1	19.11
1006	196.2	31.27
1007	196.3	24.52
1008	196.4	5.37
1009	196.5	0
1010	197.4	0
1011	197.5	12.95
1012	197.6	29.05
1013	197.7	43.11
1014	197.8	51.73
1015	197.9	46.77
1016	198	30.46
1017	198.1	13.6
1018	198.2	2.83
1019	198.3	0.38
1020	198.4	7.13
1021	198.5	28.81
1022	198.6	51.16
1023	198.7	57.06
1024	198.8	32.68
1025	198.9	0
1026	199.1	0
1027	199.2	4.01
1028	199.3	0.08
1029	199.4	0
1030	199.5	3.47
1031	199.6	28.35
1032	199.7	32.21
1033	199.8	13.29
1034	199.9	0
1035	200	0
1036	200.1	5.24
1037	200.2	0
1038	200.3	0
1039	200.4	14.56
1040	200.5	42.85
1041	200.6	43.75
1042	200.7	21.32
1043	200.8	8.91
1044	200.9	26.97
1045	201	47.1
1046	201.1	34.66
1047	201.2	0
1048	201.4	0
1049	201.5	5.95
1050	201.6	16.59
1051	201.7	24.03
1052	201.8	45.43
1053	201.9	75.84
1054	202	104.27
1055	202.1	119.7
1056	202.2	117.8
1057	202.3	95.16
1058	202.4	54.42
1059	202.5	9.99
1060	202.6	0
1061	202.7	0
1062	202.8	5.07
1063	202.9	25.6
1064	203	36.35
1065	203.1	39.9
1066	203.2	38.04
1067	203.3	29.58
1068	203.4	11.98
1069	203.5	0
1070	204	0
1071	204.1	5.57
1072	204.2	14.78
1073	204.3	9.88
1074	204.4	0
1075	205	0
1076	205.1	35.98
1077	205.2	132.03
1078	205.3	117.1
1079	205.4	45.75
1080	205.5	18.7
1081	205.6	37.07
1082	205.7	36.03
1083	205.8	4.06
1084	205.9	0
1085	206.5	0
1086	206.6	45.65
1087	206.7	118.71
1088	206.8	147.83
1089	206.9	118.91
1090	207	27.25
1091	207.1	0
1092	208.2	0
1093	208.3	39.69
1094	208.4	114.26
1095	208.5	210.64
1096	208.6	293.16
1097	208.7	309.28
1098	208.8	247.79
1099	208.9	163.27
1100	209	120.45
1101	209.1	152.77
1102	209.2	207.08
1103	209.3	212.35
1104	209.4	153.32
1105	209.5	77.26
1106	209.6	31.78
1107	209.7	17.66
1108	209.8	12.04
1109	209.9	18.95
1110	210	41.11
1111	210.1	63.66
1112	210.2	62.09
1113	210.3	35.56
1114	210.4	10.13
1115	210.5	3.79
1116	210.6	0
1117	210.8	0
1118	210.9	3.07
1119	211	26.39
1120	211.1	25.87
1121	211.2	5.34
1122	211.3	0
1123	211.6	0
1124	211.7	5.64
1125	211.8	12.39
1126	211.9	15.6
1127	212	13.47
1128	212.1	9.86
1129	212.2	7.27
1130	212.3	2.08
1131	212.4	0
1132	212.7	0
1133	212.8	10.18
1134	212.9	52.65
1135	213	100.3
1136	213.1	115.39
1137	213.2	85.86
1138	213.3	23
1139	213.4	0
1140	215.5	0
1141	215.6	35.28
1142	215.7	35.99
1143	215.8	11.21
1144	215.9	0
1145	216	13.57
1146	216.1	82.42
1147	216.2	181.72
1148	216.3	288.38
1149	216.4	404.92
1150	216.5	544.18
1151	216.6	707.15
1152	216.7	893
1153	216.8	1090.54
1154	216.9	1260.74
1155	217	1327.89
1156	217.1	1230.91
1157	217.2	973.31
1158	217.3	622.05
1159	217.4	281.6
1160	217.5	78.94
1161	217.6	25.21
1162	217.7	90.86
1163	217.8	174.46
1164	217.9	195.87
1165	218	181.1
1166	218.1	171.42
1167	218.2	159.03
1168	218.3	119.66
1169	218.4	64.4
1170	218.5	20.98
1171	218.6	4.45
1172	218.7	0
1173	220.1	0
1174	220.2	16.59
1175	220.3	7.59
1176	220.4	0
1177	220.6	0
1178	220.7	16.86
1179	220.8	87.43
1180	220.9	159.78
1181	221	164.9
1182	221.1	54.23
1183	221.2	0
1184	221.4	0
1185	221.5	15.35
1186	221.6	24.02
1187	221.7	11.43
1188	221.8	0
1189	221.9	0
1190	222	0.59
1191	222.1	24.35
1192	222.2	63.44
1193	222.3	47.47
1194	222.4	0
1195	223.4	0
1196	223.5	80.21
1197	223.6	161.14
1198	223.7	146.55
1199	223.8	88.4
1200	223.9	49.92
1201	224	56.21
1202	224.1	63.62
1203	224.2	43.83
1204	224.3	8.03
1205	224.4	0
1206	224.5	0
1207	224.6	77.91
1208	224.7	185.82
1209	224.8	245.04
1210	224.9	205.09
1211	225	92.22
1212	225.1	0
1213	225.3	0
1214	225.4	31.79
1215	225.5	40.54
1216	225.6	22.55
1217	225.7	20.46
1218	225.8	35.51
1219	225.9	68.73
1220	226	98.32
1221	226.1	102.9
1222	226.2	80.97
1223	226.3	50.95
1224	226.4	33.29
1225	226.5	7.93
1226	226.6	0
1227	227.4	0
1228	227.5	7.02
1229	227.6	6.66
1230	227.7	7.14
1231	227.8	12.7
1232	227.9	21.98
1233	228	25.54
1234	228.1	18.23
1235	228.2	7.58
1236	228.3	9.06
1237	228.4	19.32
1238	228.5	26.67
1239	228.6	32.04
1240	228.7	39.65
1241	228.8	57.46
1242	228.9	89.61
1243	229	117.24
1244	229.1	122.1
1245	229.2	92.08
1246	229.3	52
1247	229.4	26.76
1248	229.5	11.85
1249	229.6	7.97
1250	229.7	12.19
1251	229.8	10.32
1252	229.9	6.52
1253	230	14.72
1254	230.1	31.98
1255	230.2	41.37
1256	230.3	26.42
1257	230.4	0
1258	230.5	0
1259	230.6	27.83
1260	230.7	74.52
1261	230.8	101.57
1262	230.9	103.05
1263	231	105.81
1264	231.1	123.83
1265	231.2	135.12
1266	231.3	114.59
1267	231.4	65.48
1268	231.5	23.78
1269	231.6	12.48
1270	231.7	30.43
1271	231.8	52.47
1272	231.9	53.24
1273	232	36.16
1274	232.1	16.74
1275	232.2	12.17
1276	232.3	19.19
1277	232.4	32.26
1278	232.5	40.6
1279	232.6	49.45
1280	232.7	58.74
1281	232.8	67.88
1282	232.9	72.94
1283	233	67.21
1284	233.1	49.68
1285	233.2	26.87
1286	233.3	4.71
1287	233.4	0
1288	233.7	0
1289	233.8	1.43
1290	233.9	16.75
1291	234	20.71
1292	234.1	10.93
1293	234.2	0
1294	234.4	0
1295	234.5	13.86
1296	234.6	63.51
1297	234.7	99.34
1298	234.8	106.39
1299	234.9	105.16
1300	235	101.93
1301	235.1	82.59
1302	235.2	38.27
1303	235.3	0
1304	236.5	0
1305	236.6	32.34
1306	236.7	88.66
1307	236.8	85.34
1308	236.9	17.93
1309	237	0
1310	237.2	0
1311	237.3	17.47
1312	237.4	8.89
1313	237.5	0
1314	237.8	0
1315	237.9	12.38
1316	238	21.57
1317	238.1	8.93
1318	238.2	0
1319	238.6	0
1320	238.7	2.29
1321	238.8	22.21
1322	238.9	38.31
1323	239	42.25
1324	239.1	42.64
1325	239.2	43.88
1326	239.3	35.21
1327	239.4	14.16
1328	239.5	0
1329	239.9	0
1330	240	9.03
1331	240.1	12.02
1332	240.2	0.32
1333	240.3	0
1334	240.6	0
1335	240.7	7.34
1336	240.8	48.43
1337	240.9	73.15
1338	241	81.51
1339	241.1	74.75
1340	241.2	57.99
1341	241.3	36.22
1342	241.4	20.86
1343	241.5	10.5
1344	241.6	3.77
1345	241.7	2.62
1346	241.8	7.94
1347	241.9	13.56
1348	242	17.65
1349	242.1	26.42
1350	242.2	35.26
1351	242.3	31.88
1352	242.4	17.27
1353	242.5	5.25
1354	242.6	5.06
1355	242.7	4.53
1356	242.8	0
1357	243.2	0
1358	243.3	0.49
1359	243.4	17.1
1360	243.5	33.64
1361	243.6	55.49
1362	243.7	76.19
1363	243.8	101.07
1364	243.9	126.81
1365	244	142.17
1366	244.1	132.33
1367	244.2	93.72
1368	244.3	37.17
1369	244.4	0
1370	244.6	0
1371	244.7	21.7
1372	244.8	69.93
1373	244.9	86.33
1374	245	69.43
1375	245.1	40.22
1376	245.2	28.91
1377	245.3	66.14
1378	245.4	256.03
1379	245.5	927.48
1380	245.6	2203.95
1381	245.7	3889.83
1382	245.8	5747.85
1383	245.9	7555.42
1384	246	8966.74
1385	246.1	9626.51
1386	246.2	9482.64
1387	246.3	8662.33
1388	246.4	7093.88
1389	246.5	4775.59
1390	246.6	2341.29
1391	246.7	789.69
1392	246.8	440.45
1393	246.9	794.02
1394	247	1207.82
1395	247.1	1345.98
1396	247.2	1265.38
1397	247.3	1131.27
1398	247.4	977.12
1399	247.5	735.01
1400	247.6	408.48
1401	247.7	135.87
1402	247.8	20.81
1403	247.9	16.92
1404	248	25.15
1405	248.1	28.06
1406	248.2	38.5
1407	248.3	55.55
1408	248.4	54.88
1409	248.5	39.53
1410	248.6	30.5
1411	248.7	26.34
1412	248.8	22.8
1413	248.9	15.99
1414	249	13.46
1415	249.1	17.44
1416	249.2	16.96
1417	249.3	9.57
1418	249.4	5.01
1419	249.5	14.31
1420	249.6	28.5
1421	249.7	34.88
1422	249.8	26.01
1423	249.9	8.1
1424	250	0
1425	250.3	0
1426	250.4	3.04
1427	250.5	2.86
1428	250.6	0
1429	250.8	0
1430	250.9	3.97
1431	251	9.96
1432	251.1	15.95
1433	251.2	17.28
1434	251.3	8.21
1435	251.4	0
1436	251.7	0
1437	251.8	5.06
1438	251.9	0
1439	252.3	0
1440	252.4	5.41
1441	252.5	3.11
1442	252.6	0
1443	253.1	0
1444	253.2	0.17
1445	253.3	0
1446	254.2	0
1447	254.3	5.61
1448	254.4	14.26
1449	254.5	15.69
1450	254.6	1.82
1451	254.7	0
1452	255	0
1453	255.1	10.87
1454	255.2	8.85
1455	255.3	2.01
1456	255.4	0
1457	256	0
1458	256.1	1.66
1459	256.2	9.34
1460	256.3	8.79
1461	256.4	1.89
1462	256.5	0
1463	257.1	0
1464	257.2	9.88
1465	257.3	10.85
1466	257.4	0.97
1467	257.5	0
1468	258.3	0
1469	258.4	3.95
1470	258.5	11.06
1471	258.6	16.48
1472	258.7	15.63
1473	258.8	9.75
1474	258.9	7.16
1475	259	12.74
1476	259.1	19.2
1477	259.2	16.97
1478	259.3	7.84
1479	259.4	0
1480	260.3	0
1481	260.4	1.28
1482	260.5	37.5
1483	260.6	75.78
1484	260.7	91.34
1485	260.8	73.89
1486	260.9	45.6
1487	261	27.51
1488	261.1	23.88
1489	261.2	23.19
1490	261.3	16.24
1491	261.4	13.04
1492	261.5	30.77
1493	261.6	76.09
1494	261.7	149.27
1495	261.8	219.09
1496	261.9	266.84
1497	262	297.96
1498	262.1	322.39
1499	262.2	327.03
1500	262.3	283.08
1501	262.4	190.09
1502	262.5	82.3
1503	262.6	6.43
1504	262.7	0
1505	262.8	0
1506	262.9	0.5
1507	263	18.73
1508	263.1	35.23
1509	263.2	37.31
1510	263.3	23.39
1511	263.4	7.14
1512	263.5	2.41
1513	263.6	4.08
1514	263.7	4.97
1515	263.8	0.91
1516	263.9	0
1517	264.6	0
1518	264.7	3.66
1519	264.8	5.24
1520	264.9	0.84
1521	265	0
1522	265.1	1.69
1523	265.2	11.76
1524	265.3	25.17
1525	265.4	37.43
1526	265.5	48.78
1527	265.6	75.46
1528	265.7	124.91
1529	265.8	184.51
1530	265.9	233.78
1531	266	261.88
1532	266.1	260.18
1533	266.2	215.69
1534	266.3	133.26
1535	266.4	44.27
1536	266.5	0.48
1537	266.6	0
1538	266.8	0
1539	266.9	4.51
1540	267	16.51
1541	267.1	20.69
1542	267.2	12.43
1543	267.3	0.79
1544	267.4	0
1545	267.5	3.82
1546	267.6	5.46
1547	267.7	0
1548	268.7	0
1549	268.8	4.14
1550	268.9	4.16
1551	269	0
1552	269.4	0
1553	269.5	1.65
1554	269.6	0
1555	270	0
1556	270.1	4.5
1557	270.2	0.85
1558	270.3	0
1559	270.8	0
1560	270.9	3.72
1561	271	15.98
1562	271.1	25.91
1563	271.2	27.36
1564	271.3	17.33
1565	271.4	0.6
1566	271.5	0
1567	271.8	0
1568	271.9	4.47
1569	272	18.68
1570	272.1	25.91
1571	272.2	16.64
1572	272.3	0
1573	272.8	0
1574	272.9	3.9
1575	273	3.34
1576	273.1	0
1577	273.9	0
1578	274	2.88
1579	274.1	9.62
1580	274.2	10.25
1581	274.3	4.13
1582	274.4	0
1583	276	0
1584	276.1	18.26
1585	276.2	15.69
1586	276.3	4.36
1587	276.4	1.9
1588	276.5	15.52
1589	276.6	46.31
1590	276.7	80.05
1591	276.8	90.21
1592	276.9	63.03
1593	277	20.52
1594	277.1	0
1595	277.2	0.31
1596	277.3	9.58
1597	277.4	6.59
1598	277.5	0
1599	277.8	0
1600	277.9	10
1601	278	19.79
1602	278.1	18.32
1603	278.2	9.31
1604	278.3	6.75
1605	278.4	17.15
1606	278.5	30.32
1607	278.6	31.37
1608	278.7	20.48
1609	278.8	7.36
1610	278.9	0.29
1611	279	0
1612	279.5	0
1613	279.6	1.85
1614	279.7	10.92
1615	279.8	17.82
1616	279.9	16.32
1617	280	2.44
1618	280.1	0
1619	280.2	0
1620	280.3	30.24
1621	280.4	131.48
1622	280.5	144.61
1623	280.6	0
1624	281	0
1625	281.1	95.71
1626	281.2	116.56
1627	281.3	49.45
1628	281.4	4.28
1629	281.5	14.17
1630	281.6	59.78
1631	281.7	86.62
1632	281.8	78.77
1633	281.9	99.15
1634	282	168.3
1635	282.1	223.64
1636	282.2	198.23
1637	282.3	107.9
1638	282.4	43.4
1639	282.5	29.52
1640	282.6	41.86
1641	282.7	53.82
1642	282.8	82.45
1643	282.9	137.09
1644	283	181.37
1645	283.1	185.25
1646	283.2	150.68
1647	283.3	94.67
1648	283.4	43.61
1649	283.5	9.73
1650	283.6	0.07
1651	283.7	3.43
1652	283.8	6.87
1653	283.9	2.49
1654	284	1.17
1655	284.1	8.76
1656	284.2	14.79
1657	284.3	7.32
1658	284.4	0
1659	285.5	0
1660	285.6	0.14
1661	285.7	0.07
1662	285.8	0.47
1663	285.9	0.66
1664	286	0.43
1665	286.1	1.02
1666	286.2	2.37
1667	286.3	2.09
1668	286.4	0
1669	286.7	0
1670	286.8	6.96
1671	286.9	11
1672	287	4.29
1673	287.1	0
1674	287.3	0
1675	287.4	2.27
1676	287.5	2.08
1677	287.6	0
1678	287.8	0
1679	287.9	0.65
1680	288	0
1681	288.9	0
1682	289	3.7
1683	289.1	7.05
1684	289.2	9.61
1685	289.3	15.42
1686	289.4	95.43
1687	289.5	385.38
1688	289.6	1022.55
1689	289.7	1934.62
1690	289.8	2954.09
1691	289.9	3881.35
1692	290	4568.03
1693	290.1	4957.18
1694	290.2	5022.67
1695	290.3	4657.36
1696	290.4	3738.96
1697	290.5	2415.51
1698	290.6	1161.73
1699	290.7	467.58
1700	290.8	349.67
1701	290.9	552.24
1702	291	802.8
1703	291.1	909.7
1704	291.2	835.09
1705	291.3	628.99
1706	291.4	392.13
1707	291.5	207.38
1708	291.6	79.85
1709	291.7	6.58
1710	291.8	0
1711	291.9	0
1712	292	20.98
1713	292.1	53.05
1714	292.2	55.25
1715	292.3	28.47
1716	292.4	0
1717	292.6	0
1718	292.7	44.99
1719	292.8	84.52
1720	292.9	99.39
1721	293	83.1
1722	293.1	50.3
1723	293.2	21.7
1724	293.3	8.64
1725	293.4	10.76
1726	293.5	14.29
1727	293.6	11.9
1728	293.7	5.33
1729	293.8	0.06
1730	293.9	0
1731	295	0
1732	295.1	3.47
1733	295.2	3.48
1734	295.3	0.42
1735	295.4	0
1736	295.5	0.87
1737	295.6	0.36
1738	295.7	0
1739	296	0
1740	296.1	33.52
1741	296.2	84.92
1742	296.3	64.74
1743	296.4	58.65
1744	296.5	143.04
1745	296.6	317
1746	296.7	471.42
1747	296.8	517
1748	296.9	416.2
1749	297	134.17
1750	297.1	0
1751	297.5	0
1752	297.6	13.41
1753	297.7	14.3
1754	297.8	42.7
1755	297.9	67.22
1756	298	18.22
1757	298.1	0
1758	298.3	0
1759	298.4	87.12
1760	298.5	216.47
1761	298.6	203.77
1762	298.7	57.16
1763	298.8	0
1764	299	0
1765	299.1	28.58
1766	299.2	80.78
1767	299.3	57.45
1768	299.4	2.28
1769	299.5	0
1770	300.3	0
1771	300.4	7.41
1772	300.5	21.7
1773	300.6	32.71
1774	300.7	46.04
1775	300.8	53.62
1776	300.9	48.33
1777	301	30.32
1778	301.1	9
1779	301.2	0
1780	301.5	0
1781	301.6	0.47
1782	301.7	2.51
1783	301.8	2.21
1784	301.9	0
1785	303.3	0
1786	303.4	0.78
1787	303.5	4.51
1788	303.6	0.04
1789	303.7	0
1790	304.1	0
1791	304.2	10.42
1792	304.3	20.44
1793	304.4	21.92
1794	304.5	13.93
1795	304.6	5.66
1796	304.7	5.25
1797	304.8	10.33
1798	304.9	13.05
1799	305	11.29
1800	305.1	8.18
1801	305.2	5.46
1802	305.3	2.48
1803	305.4	3.3
1804	305.5	13.97
1805	305.6	36.58
1806	305.7	56.12
1807	305.8	60.64
1808	305.9	60.43
1809	306	69.66
1810	306.1	81.43
1811	306.2	77.5
1812	306.3	52.41
1813	306.4	21.33
1814	306.5	0
1815	307.2	0
1816	307.3	0.09
1817	307.4	2.28
1818	307.5	1.09
1819	307.6	0
1820	307.7	0
1821	307.8	0.02
1822	307.9	4.13
1823	308	6.84
1824	308.1	6.29
1825	308.2	3.28
1826	308.3	0
1827	309.2	0
1828	309.3	3.47
1829	309.4	7.37
1830	309.5	7.66
1831	309.6	10.46
1832	309.7	18.56
1833	309.8	25.95
1834	309.9	23.36
1835	310	10.96
1836	310.1	0
1837	310.5	0
1838	310.6	5.2
1839	310.7	20.17
1840	310.8	26
1841	310.9	17.72
1842	311	3.14
1843	311.1	0
1844	311.5	0
1845	311.6	0.3
1846	311.7	1.22
1847	311.8	2.58
1848	311.9	4.22
1849	312	5.51
1850	312.1	5.42
1851	312.2	3.68
1852	312.3	1.57
1853	312.4	0.18
1854	312.5	0
1855	314.3	0
1856	314.4	1.15
1857	314.5	0.27
1858	314.6	0
1859	314.9	0
1860	315	7.55
1861	315.1	16.37
1862	315.2	15.66
1863	315.3	8.87
1864	315.4	2.25
1865	315.5	0
1866	315.6	0
1867	315.7	0.64
1868	315.8	3.68
1869	315.9	7.55
1870	316	9.59
1871	316.1	7.15
1872	316.2	0.75
1873	316.3	0
1874	316.7	0
1875	316.8	0.11
1876	316.9	2.88
1877	317	6.17
1878	317.1	9.15
1879	317.2	10.38
1880	317.3	9.13
1881	317.4	6.13
1882	317.5	3.1
1883	317.6	1.32
1884	317.7	1.07
1885	317.8	2.23
1886	317.9	4.12
1887	318	5.01
1888	318.1	3.6
1889	318.2	0.69
1890	318.3	0
1891	318.7	0
1892	318.8	3.15
1893	318.9	21.51
1894	319	24.78
1895	319.1	14.38
1896	319.2	2.52
1897	319.3	0
1898	319.6	0
1899	319.7	0.56
1900	319.8	1.03
1901	319.9	0.44
1902	320	0
1903	321.3	0
1904	321.4	0.85
1905	321.5	7.29
1906	321.6	10.56
1907	321.7	11.75
1908	321.8	7
1909	321.9	0
1910	322.3	0
1911	322.4	2.86
1912	322.5	4.75
1913	322.6	2.2
1914	322.7	0
1915	323.2	0
1916	323.3	2
1917	323.4	0.77
1918	323.5	0
1919	323.6	0
1920	323.7	0.42
1921	323.8	4.89
1922	323.9	7.29
1923	324	5.21
1924	324.1	0.77
1925	324.2	0
1926	324.6	0
1927	324.7	1.35
1928	324.8	2.16
1929	324.9	4.04
1930	325	7.82
1931	325.1	11.31
1932	325.2	10.97
1933	325.3	7.34
1934	325.4	4.29
1935	325.5	2.68
1936	325.6	0
1937	326	0
1938	326.1	12.37
1939	326.2	17.75
1940	326.3	7.95
1941	326.4	0
1942	326.6	0
1943	326.7	1.78
1944	326.8	17.56
1945	326.9	23.91
1946	327	19.05
1947	327.1	7.72
1948	327.2	0
1949	327.4	0
1950	327.5	1.11
1951	327.6	4.78
1952	327.7	7.85
1953	327.8	9.31
1954	327.9	8.78
1955	328	6.82
1956	328.1	4.36
1957	328.2	2.17
1958	328.3	0.45
1959	328.4	0
1960	328.5	0
1961	328.6	1.04
1962	328.7	3.85
1963	328.8	3.92
1964	328.9	0.35
1965	329	0
1966	329.2	0
1967	329.3	2.04
1968	329.4	3.13
1969	329.5	4.06
1970	329.6	5.75
1971	329.7	7.5
1972	329.8	7.65
1973	329.9	5.62
1974	330	2.62
1975	330.1	0.14
1976	330.2	0
1977	330.3	0
1978	330.4	2.18
1979	330.5	4.68
1980	330.6	4.91
1981	330.7	1.55
1982	330.8	0
1983	331.3	0
1984	331.4	1.06
1985	331.5	0
1986	332.8	0
1987	332.9	0.63
1988	333	17.19
1989	333.1	26.69
1990	333.2	27.96
1991	333.3	30.11
1992	333.4	38.74
1993	333.5	83.45
1994	333.6	184.59
1995	333.7	347.66
1996	333.8	546.56
1997	333.9	766.08
[truncated: 1,553 more rows]

## Sheet: Sheet6
+ESI Scan (rt: 8.91-9.09 min, 40 scans) Frag=100.0V CF=0.000 DF=0.000 4608-01.d Subtract
Index	X	Y
0	50	1.35
1	50.1	0.7
2	50.2	0.4
3	50.3	0.27
4	50.4	0.06
5	50.5	0
6	50.7	0
7	50.8	0.45
8	50.9	1.31
9	51	2.51
10	51.1	3.5
11	51.2	3.5
12	51.3	2.57
13	51.4	1.59
14	51.5	1.14
15	51.6	0.91
16	51.7	0.43
17	51.8	0
18	52.4	0
19	52.5	0.01
20	52.6	0.35
21	52.7	0.37
22	52.8	0.55
23	52.9	1.52
24	53	3.37
25	53.1	5.13
26	53.2	5.43
27	53.3	4.07
28	53.4	2.45
29	53.5	1.77
30	53.6	1.63
31	53.7	1.12
32	53.8	0.24
33	53.9	0
34	54.1	0
35	54.2	0.94
36	54.3	3.15
37	54.4	5.17
38	54.5	1.28
39	54.6	0
40	54.9	0
41	55	141.39
42	55.1	370.5
43	55.2	451.43
44	55.3	307.25
45	55.4	67.34
46	55.5	0
47	56.2	0
48	56.3	21.42
49	56.4	29.12
50	56.5	27.95
51	56.6	3.72
52	56.7	0
53	57.1	0
54	57.2	12.82
55	57.3	44.1
56	57.4	47.58
57	57.5	59.59
58	57.6	54.76
59	57.7	9.74
60	57.8	0
61	58.3	0
62	58.4	50.48
63	58.5	134.23
64	58.6	356.04
65	58.7	482.7
66	58.8	243.53
67	58.9	0
68	59.8	0
69	59.9	15.64
70	60	99.72
71	60.1	61.64
72	60.2	10.33
73	60.3	0
74	60.4	1.07
75	60.5	30.44
76	60.6	0
77	61	0
78	61.1	563.52
79	61.2	1135.81
80	61.3	1111.66
81	61.4	608.63
82	61.5	158.22
83	61.6	8.64
84	61.7	0
85	61.8	0
86	61.9	46.86
87	62	30.11
88	62.1	8.66
89	62.2	0
90	62.3	3.19
91	62.4	10.46
92	62.5	4.61
93	62.6	0
94	62.7	7.77
95	62.8	29.07
96	62.9	38.64
97	63	36.9
98	63.1	33.51
99	63.2	34.11
100	63.3	32.09
101	63.4	18.71
102	63.5	0.51
103	63.6	0
104	63.9	0
105	64	9.53
106	64.1	19.59
107	64.2	21.59
108	64.3	16.79
109	64.4	10.58
110	64.5	5.78
111	64.6	2.92
112	64.7	0.93
113	64.8	0
114	66.4	0
115	66.5	0.92
116	66.6	3.01
117	66.7	5.24
118	66.8	3.63
119	66.9	0
120	67.2	0
121	67.3	4.26
122	67.4	6.41
123	67.5	0
124	67.7	0
125	67.8	0.38
126	67.9	2.35
127	68	2.17
128	68.1	0.43
129	68.2	0
130	68.3	0.8
131	68.4	6.64
132	68.5	11.48
133	68.6	0
134	69	0
135	69.1	157.47
136	69.2	223.32
137	69.3	172.77
138	69.4	90.54
139	69.5	23.41
140	69.6	0
141	70	0
142	70.1	35.89
143	70.2	37.76
144	70.3	29.61
145	70.4	27.35
146	70.5	17.04
147	70.6	0
148	70.7	0
149	70.8	7.5
150	70.9	143.05
151	71	271.37
152	71.1	259.79
153	71.2	77.51
154	71.3	0
155	71.7	0
156	71.8	40.29
157	71.9	37.89
158	72	0
159	72.8	0
160	72.9	180.08
161	73	520.34
162	73.1	597.26
163	73.2	517.53
164	73.3	469.78
165	73.4	428.21
166	73.5	282.42
167	73.6	70.77
168	73.7	9.17
169	73.8	2.22
170	73.9	50.24
171	74	129.52
172	74.1	193.17
173	74.2	110.67
174	74.3	0
175	74.4	0
176	74.5	16.46
177	74.6	17.81
178	74.7	0
179	74.9	0
180	75	57.52
181	75.1	175.26
182	75.2	203.09
183	75.3	160.07
184	75.4	100.82
185	75.5	56.24
186	75.6	29.56
187	75.7	0
188	76.2	0
189	76.3	0.88
190	76.4	0
191	76.5	0
192	76.6	0.87
193	76.7	56.65
194	76.8	148.48
195	76.9	207.11
196	77	143.47
197	77.1	0
198	77.5	0
199	77.6	153.97
200	77.7	235.16
201	77.8	145.45
202	77.9	0
203	78.2	0
204	78.3	116.38
205	78.4	98.94
206	78.5	12.5
207	78.6	0
208	78.7	11.84
209	78.8	0
210	79.3	0
211	79.4	7.15
212	79.5	29.74
213	79.6	17.25
214	79.7	0
215	80.4	0
216	80.5	5.96
217	80.6	10.85
218	80.7	0
219	81.2	0
220	81.3	102.13
221	81.4	131.44
222	81.5	97.89
223	81.6	43.17
224	81.7	9.28
225	81.8	2.94
226	81.9	0
227	82.2	0
228	82.3	31.75
229	82.4	45.2
230	82.5	23.29
231	82.6	0
232	83	0
233	83.1	32.15
234	83.2	68.43
235	83.3	41.14
236	83.4	0
237	83.7	0
238	83.8	24.8
239	83.9	0
240	84.1	0
241	84.2	109.49
242	84.3	143.12
243	84.4	61.11
244	84.5	0
245	85.1	0
246	85.2	31.75
247	85.3	100.63
248	85.4	109.95
249	85.5	85.12
250	85.6	63.92
251	85.7	35.76
252	85.8	15.59
253	85.9	11.93
254	86	12.6
255	86.1	14.85
256	86.2	10.87
257	86.3	0
258	86.4	0
259	86.5	5.5
260	86.6	40.99
261	86.7	76.25
262	86.8	62.15
263	86.9	0
264	87.2	0
265	87.3	41.29
266	87.4	141.27
267	87.5	40.79
268	87.6	0
269	88.7	0
270	88.8	188.05
271	88.9	438.88
272	89	524.61
273	89.1	407.05
274	89.2	330.09
275	89.3	562.55
276	89.4	803.8
277	89.5	514.16
278	89.6	0
279	89.8	0
280	89.9	170.85
281	90	484.04
282	90.1	604.19
283	90.2	488.36
284	90.3	233.96
285	90.4	18.86
286	90.5	0
287	90.6	63.99
288	90.7	188.82
289	90.8	213.78
290	90.9	49.26
291	91	0
292	91.2	0
293	91.3	101.19
294	91.4	268.07
295	91.5	203.4
296	91.6	47.58
297	91.7	0
298	91.9	0
299	92	10.27
300	92.1	6.18
301	92.2	0
302	92.7	0
303	92.8	17.04
304	92.9	17.42
305	93	0
306	93.7	0
307	93.8	3.08
308	93.9	4.14
309	94	3.31
310	94.1	4.48
311	94.2	5.62
312	94.3	1.82
313	94.4	0
314	95.2	0
315	95.3	29.9
316	95.4	52.42
317	95.5	19.85
318	95.6	0
319	95.8	0
320	95.9	33.5
321	96	68.96
322	96.1	79.13
323	96.2	67.41
324	96.3	53.01
325	96.4	51.19
326	96.5	73.24
327	96.6	132.69
328	96.7	214.05
329	96.8	252.24
330	96.9	212.95
331	97	123.68
332	97.1	48.08
333	97.2	11.44
334	97.3	0
335	98	0
336	98.1	71.92
337	98.2	111.07
338	98.3	47.3
339	98.4	0
340	98.5	0
341	98.6	98.93
342	98.7	438.74
343	98.8	659.98
344	98.9	599.59
345	99	390.92
346	99.1	200.03
347	99.2	0
348	99.6	0
349	99.7	31.12
350	99.8	106.13
351	99.9	206.78
352	100	221.48
353	100.1	111.16
354	100.2	0
355	100.8	0
356	100.9	98.66
357	101	98.33
358	101.1	0
359	101.2	0
360	101.3	117
361	101.4	322.91
362	101.5	327.62
363	101.6	29.39
364	101.7	0
365	102	0
366	102.1	99.03
367	102.2	462.29
368	102.3	677.75
369	102.4	730.1
370	102.5	512.31
371	102.6	81.54
372	102.7	0
373	102.9	0
374	103	27.7
375	103.1	10.97
376	103.2	0
377	103.7	0
378	103.8	24.04
379	103.9	48.03
380	104	47.99
381	104.1	27.01
382	104.2	0
383	104.3	0
384	104.4	18.98
385	104.5	76.81
386	104.6	118.05
387	104.7	108.03
388	104.8	46.26
389	104.9	0
390	105	0
391	105.1	13.4
392	105.2	65.06
393	105.3	35.15
394	105.4	0
395	105.6	0
396	105.7	3.33
397	105.8	28.13
398	105.9	19.61
399	106	0
400	106.2	0
401	106.3	17.09
402	106.4	61.27
403	106.5	0
404	106.7	0
405	106.8	310.81
406	106.9	677.15
407	107	729.97
408	107.1	549.37
409	107.2	402.74
410	107.3	352.13
411	107.4	285.5
412	107.5	158
413	107.6	89.36
414	107.7	90.09
415	107.8	53.98
416	107.9	0
417	108.7	0
418	108.8	17.4
419	108.9	53.42
420	109	54.3
421	109.1	6.42
422	109.2	0
423	109.9	0
424	110	28.72
425	110.1	72
426	110.2	89.64
427	110.3	60.54
428	110.4	0.46
429	110.5	0
430	111.1	0
431	111.2	17.98
432	111.3	0
433	111.6	0
434	111.7	54.11
435	111.8	91.53
436	111.9	92.73
437	112	69.69
438	112.1	62.27
439	112.2	53.73
440	112.3	17.12
441	112.4	0
442	112.6	0
443	112.7	21.25
444	112.8	44.04
445	112.9	19.12
446	113	5.33
447	113.1	33.87
448	113.2	42.69
449	113.3	0
450	114.2	0
451	114.3	26.56
452	114.4	67.3
453	114.5	0
454	114.9	0
455	115	206.66
456	115.1	182.99
457	115.2	96.82
458	115.3	77.39
459	115.4	105.12
460	115.5	125.9
461	115.6	135.97
462	115.7	52.21
463	115.8	65.94
464	115.9	77.13
465	116	119.93
466	116.1	201.91
467	116.2	269.96
468	116.3	268.93
469	116.4	180.62
470	116.5	39.45
471	116.6	0
472	117	0
473	117.1	60.04
474	117.2	200.81
475	117.3	222.61
476	117.4	69.02
477	117.5	0
478	117.8	0
479	117.9	1.54
480	118	8.1
481	118.1	9.26
482	118.2	0
483	118.9	0
484	119	91.87
485	119.1	243.46
486	119.2	269.8
487	119.3	233.72
488	119.4	179.66
489	119.5	99.66
490	119.6	1.52
491	119.7	0
492	119.9	0
493	120	18.11
494	120.1	0
495	120.8	0
496	120.9	36.26
497	121	127.87
498	121.1	126.91
499	121.2	69.91
500	121.3	51.01
501	121.4	110.58
502	121.5	188.35
503	121.6	209.88
504	121.7	122.65
505	121.8	21.57
506	121.9	0
507	122.9	0
508	123	122.43
509	123.1	201.24
510	123.2	159.85
511	123.3	48.62
512	123.4	0
513	123.7	0
514	123.8	48.55
515	123.9	70.22
516	124	57.44
517	124.1	39.03
518	124.2	13.29
519	124.3	0
520	124.9	0
521	125	5.09
522	125.1	0
523	125.2	0
524	125.3	24.67
525	125.4	73.23
526	125.5	121.31
527	125.6	176.95
528	125.7	250.66
529	125.8	331.15
530	125.9	391.18
531	126	401.22
532	126.1	361.37
533	126.2	304.92
534	126.3	258.66
535	126.4	239.29
536	126.5	240.03
537	126.6	256.68
538	126.7	281.77
539	126.8	287.68
540	126.9	241.26
541	127	114.72
542	127.1	0
543	127.8	0
544	127.9	12.98
545	128	45.83
546	128.1	64.22
547	128.2	68.65
548	128.3	44.98
549	128.4	24.07
550	128.5	55.15
551	128.6	90.59
552	128.7	59.14
553	128.8	0
554	128.9	0
555	129	11.65
556	129.1	111.65
557	129.2	150.92
558	129.3	110.18
559	129.4	51.96
560	129.5	24.08
561	129.6	42.94
562	129.7	60.7
563	129.8	88.31
564	129.9	124.95
565	130	101.72
566	130.1	0
567	130.4	0
568	130.5	143.33
569	130.6	302.42
570	130.7	371.93
571	130.8	381.02
572	130.9	348.33
573	131	285
574	131.1	212.05
575	131.2	176.18
576	131.3	191.32
577	131.4	199.42
578	131.5	149.9
579	131.6	31.14
580	131.7	0
581	131.9	0
582	132	35.82
583	132.1	78.13
584	132.2	68.1
585	132.3	0
586	133.2	0
587	133.3	28.06
588	133.4	33.11
589	133.5	9.33
590	133.6	0
591	134.4	0
592	134.5	12.09
593	134.6	37.58
594	134.7	24.67
595	134.8	0
596	135.1	0
597	135.2	18.99
598	135.3	10.53
599	135.4	15.24
600	135.5	26.23
601	135.6	32.8
602	135.7	62.69
603	135.8	113
604	135.9	158.06
605	136	164.05
606	136.1	143
607	136.2	135.4
608	136.3	168.01
609	136.4	122.27
610	136.5	0
611	136.8	0
612	136.9	110.46
613	137	438.07
614	137.1	366.46
615	137.2	119.2
616	137.3	90.27
617	137.4	296.46
618	137.5	424.62
619	137.6	288.65
620	137.7	2.91
621	137.8	0
622	138.3	0
623	138.4	5.34
624	138.5	0
625	139.6	0
626	139.7	10.1
627	139.8	67.06
628	139.9	64.57
629	140	21.76
630	140.1	16.14
631	140.2	68.71
632	140.3	89.84
633	140.4	35.97
634	140.5	0
635	140.7	0
636	140.8	0.04
637	140.9	75.26
638	141	116.9
639	141.1	130.4
640	141.2	112.17
641	141.3	42.39
642	141.4	0
643	141.5	0
644	141.6	38.41
645	141.7	106.97
646	141.8	70.57
647	141.9	0
648	142	0
649	142.1	8.62
650	142.2	57.79
651	142.3	73.52
652	142.4	93.61
653	142.5	139.4
654	142.6	230.73
655	142.7	310.45
656	142.8	315.74
657	142.9	203.76
658	143	41.4
659	143.1	0
660	143.7	0
661	143.8	1.19
662	143.9	0
663	144	8.28
664	144.1	61.43
665	144.2	113.61
666	144.3	144.95
667	144.4	210.93
668	144.5	260.42
669	144.6	229.92
670	144.7	111.82
671	144.8	0
672	145.2	0
673	145.3	23.21
674	145.4	149.27
675	145.5	203.06
676	145.6	158.1
677	145.7	57.91
678	145.8	0
679	145.9	4.55
680	146	74.61
681	146.1	123.74
682	146.2	109.94
683	146.3	71.01
684	146.4	76.27
685	146.5	143.44
686	146.6	202.17
687	146.7	173.87
688	146.8	67.26
689	146.9	0
690	148.6	0
691	148.7	24.04
692	148.8	99.05
693	148.9	15.8
694	149	0
695	149.2	0
696	149.3	25.2
697	149.4	45.68
698	149.5	0
699	149.7	0
700	149.8	16.54
701	149.9	50.92
702	150	64.79
703	150.1	72.13
704	150.2	64.96
705	150.3	29.84
706	150.4	0
707	151	0
708	151.1	77.73
709	151.2	161.86
710	151.3	122.15
711	151.4	39.69
712	151.5	0
713	151.9	0
714	152	8.51
715	152.1	14.71
716	152.2	0
717	152.6	0
718	152.7	78.62
719	152.8	342.31
720	152.9	413.25
721	153	177.02
722	153.1	0
723	153.7	0
724	153.8	2.64
725	153.9	0
726	155	0
727	155.1	16.22
728	155.2	78.97
729	155.3	74.36
730	155.4	50.53
731	155.5	51.93
732	155.6	77.6
733	155.7	73.7
734	155.8	5.84
735	155.9	0
736	156.2	0
737	156.3	109.15
738	156.4	254.35
739	156.5	244.54
740	156.6	71.9
741	156.7	0
742	156.9	0
743	157	35.43
744	157.1	111.74
745	157.2	0
746	157.6	0
747	157.7	5.07
748	157.8	0
749	157.9	0
750	158	6.11
751	158.1	76.96
752	158.2	149.83
753	158.3	162.38
754	158.4	115.26
755	158.5	48.91
756	158.6	0
757	159	0
758	159.1	22.58
759	159.2	80.85
760	159.3	58.98
761	159.4	0
762	160.3	0
763	160.4	20.22
764	160.5	0
765	161	0
766	161.1	150.47
767	161.2	332.66
768	161.3	366.81
769	161.4	270.3
770	161.5	135.15
771	161.6	27.29
772	161.7	0.73
773	161.8	82.68
774	161.9	202.63
775	162	274.54
776	162.1	258.96
777	162.2	172.13
778	162.3	38.94
779	162.4	0
780	162.8	0
781	162.9	38.75
782	163	92
783	163.1	83.64
784	163.2	42.1
785	163.3	21.57
786	163.4	42.09
787	163.5	43.44
788	163.6	28.1
789	163.7	15.61
790	163.8	3.94
791	163.9	0
792	164	0
793	164.1	9.46
794	164.2	15.58
795	164.3	2.78
796	164.4	0
797	164.9	0
798	165	18.8
799	165.1	39.79
800	165.2	23.84
801	165.3	4.01
802	165.4	0
803	165.5	1.29
804	165.6	0.71
805	165.7	0
806	166.1	0
807	166.2	16.15
808	166.3	50.31
809	166.4	86.88
810	166.5	97.17
811	166.6	74.93
812	166.7	26.28
813	166.8	0
814	166.9	0
815	167	33.5
816	167.1	74.59
817	167.2	68.26
818	167.3	33.09
819	167.4	2.49
820	167.5	0
821	167.6	0.91
822	167.7	17.85
823	167.8	32.07
824	167.9	37.08
825	168	26.23
826	168.1	3.23
827	168.2	0
828	168.3	15.43
829	168.4	104.49
830	168.5	231.53
831	168.6	388.94
832	168.7	593.78
833	168.8	776.42
834	168.9	807.15
835	169	672.74
836	169.1	527.07
837	169.2	472.76
838	169.3	424.37
839	169.4	277.47
840	169.5	95.41
841	169.6	6.62
842	169.7	10.42
843	169.8	34.61
844	169.9	36.68
845	170	9.98
846	170.1	0
847	170.7	0
848	170.8	0.28
849	170.9	39.09
850	171	109.41
851	171.1	121.71
852	171.2	21.81
853	171.3	0
854	171.6	0
855	171.7	12.08
856	171.8	1.54
857	171.9	0
858	173.1	0
859	173.2	13.7
860	173.3	14.27
861	173.4	0.18
862	173.5	0
863	174.5	0
864	174.6	53.82
865	174.7	128.24
866	174.8	153.44
867	174.9	154.94
868	175	195.06
869	175.1	265.27
870	175.2	295.08
871	175.3	242.97
872	175.4	136.33
873	175.5	43.38
874	175.6	0
875	175.9	0
876	176	10.68
877	176.1	24.97
878	176.2	17.01
879	176.3	0
880	177.3	0
881	177.4	121.98
882	177.5	133.14
883	177.6	88.21
884	177.7	65.09
885	177.8	80.09
886	177.9	89.83
887	178	87.24
888	178.1	66.01
889	178.2	32.85
890	178.3	0
891	178.6	0
892	178.7	25.07
893	178.8	57.43
894	178.9	71.26
895	179	34.93
896	179.1	0
897	181.3	0
898	181.4	40.45
899	181.5	59.6
900	181.6	39.55
901	181.7	8.05
902	181.8	0.71
903	181.9	14.88
904	182	27.73
905	182.1	25.24
906	182.2	13.2
907	182.3	8.63
908	182.4	15.67
909	182.5	27.26
910	182.6	47.74
911	182.7	72.89
912	182.8	81.74
913	182.9	54.49
914	183	0
915	183.4	0
916	183.5	15.6
917	183.6	17.54
918	183.7	21.8
919	183.8	27.53
920	183.9	16.22
921	184	0
922	184.7	0
923	184.8	17.31
924	184.9	22.6
925	185	0.45
926	185.1	0
927	185.3	0
928	185.4	23.74
929	185.5	32
930	185.6	25.06
931	185.7	26.94
932	185.8	39.11
933	185.9	47.03
934	186	37.75
935	186.1	24.06
936	186.2	14.82
937	186.3	8.08
938	186.4	0
939	187.3	0
940	187.4	14.59
941	187.5	26.23
942	187.6	12.87
943	187.7	0
944	188	0
945	188.1	22.32
946	188.2	42.44
947	188.3	54.95
948	188.4	68.83
949	188.5	88.59
950	188.6	92.54
951	188.7	56.71
952	188.8	0
953	190.1	0
954	190.2	4.36
955	190.3	65.71
956	190.4	128.33
957	190.5	162.37
958	190.6	149.99
959	190.7	98.07
960	190.8	36.75
961	190.9	8.92
962	191	0
963	191.4	0
964	191.5	33.77
965	191.6	32.43
966	191.7	0
967	191.9	0
968	192	71.25
969	192.1	88.45
970	192.2	59.23
971	192.3	44.6
972	192.4	57.73
973	192.5	66.56
974	192.6	61.61
975	192.7	43.87
976	192.8	38.91
977	192.9	34.02
978	193	12.52
979	193.1	0
980	193.5	0
981	193.6	29.24
982	193.7	49.82
983	193.8	27.39
984	193.9	0
985	194.2	0
986	194.3	12.54
987	194.4	19.4
988	194.5	0
989	195.4	0
990	195.5	0.16
991	195.6	20.67
992	195.7	1.71
993	195.8	0
994	196.2	0
995	196.3	2.87
996	196.4	20.59
997	196.5	28.54
998	196.6	9
999	196.7	0
1000	197	0
1001	197.1	43.23
1002	197.2	12.72
1003	197.3	0
1004	198.2	0
1005	198.3	11.38
1006	198.4	8.76
1007	198.5	0
1008	198.9	0
1009	199	15.85
1010	199.1	37.41
1011	199.2	42.6
1012	199.3	35.54
1013	199.4	23.03
1014	199.5	33.71
1015	199.6	65.06
1016	199.7	71.85
1017	199.8	26.67
1018	199.9	0
1019	200	0
1020	200.1	62.05
1021	200.2	157.89
1022	200.3	309.83
1023	200.4	824.49
1024	200.5	1887.94
1025	200.6	3331.71
1026	200.7	4691.97
1027	200.8	5639.15
1028	200.9	6188.43
1029	201	6499.59
1030	201.1	6618.47
1031	201.2	6345.81
1032	201.3	5365.62
1033	201.4	3674.33
1034	201.5	1851.13
1035	201.6	696.09
1036	201.7	315.94
1037	201.8	342.71
1038	201.9	461.05
1039	202	569.2
1040	202.1	650.16
1041	202.2	623.32
1042	202.3	457.82
1043	202.4	243.35
1044	202.5	74.61
1045	202.6	0
1046	203	0
1047	203.1	18.69
1048	203.2	50.94
1049	203.3	44.04
1050	203.4	26.54
1051	203.5	13.94
1052	203.6	16.05
1053	203.7	26.58
1054	203.8	34.62
1055	203.9	24.81
1056	204	0
1057	204.1	0
1058	204.2	30.65
1059	204.3	126.99
1060	204.4	176.88
1061	204.5	110.36
1062	204.6	0
1063	205.3	0
1064	205.4	10.05
1065	205.5	69.19
1066	205.6	13.97
1067	205.7	0
1068	205.8	4.74
1069	205.9	34.73
1070	206	35.43
1071	206.1	0
1072	206.6	0
1073	206.7	53.15
1074	206.8	18.24
1075	206.9	0
1076	207.4	0
1077	207.5	24.8
1078	207.6	65.44
1079	207.7	53.6
1080	207.8	23.48
1081	207.9	0
1082	208.1	0
1083	208.2	17.41
1084	208.3	94.93
1085	208.4	121.91
1086	208.5	68.56
1087	208.6	0
1088	208.9	0
1089	209	19.79
1090	209.1	25.71
1091	209.2	0
1092	209.6	0
1093	209.7	0.77
1094	209.8	0
1095	210.8	0
1096	210.9	22.84
1097	211	50.84
1098	211.1	46.71
1099	211.2	45.69
1100	211.3	51.11
1101	211.4	45.1
1102	211.5	28.71
1103	211.6	22.13
1104	211.7	25.2
1105	211.8	15.59
1106	211.9	0
1107	212.5	0
1108	212.6	11.4
1109	212.7	21.5
1110	212.8	18.78
1111	212.9	1.47
1112	213	0
1113	213.1	0
1114	213.2	4.78
1115	213.3	16.56
1116	213.4	22.73
1117	213.5	43.11
1118	213.6	67.66
1119	213.7	71.69
1120	213.8	40.89
1121	213.9	0
1122	214.2	0
1123	214.3	6.61
1124	214.4	22.86
1125	214.5	35.25
1126	214.6	51.09
1127	214.7	72.84
1128	214.8	70.81
1129	214.9	43.21
1130	215	24.36
1131	215.1	41.64
1132	215.2	78.8
1133	215.3	79.98
1134	215.4	38.66
1135	215.5	0
1136	216	0
1137	216.1	2.59
1138	216.2	24.59
1139	216.3	25.99
1140	216.4	2.06
1141	216.5	0
1142	216.8	0
1143	216.9	1.43
1144	217	0
1145	217.3	0
1146	217.4	6.56
1147	217.5	1.02
1148	217.6	0
1149	217.7	13.13
1150	217.8	15.03
1151	217.9	0
1152	218.6	0
1153	218.7	15
1154	218.8	25.83
1155	218.9	0
1156	219.5	0
1157	219.6	50.66
1158	219.7	80.71
1159	219.8	62.91
1160	219.9	7.3
1161	220	0
1162	220.2	0
1163	220.3	27.71
1164	220.4	103.57
1165	220.5	151.92
1166	220.6	113.6
1167	220.7	17.13
1168	220.8	0
1169	221.2	0
1170	221.3	33.13
1171	221.4	16.36
1172	221.5	0
1173	222.2	0
1174	222.3	12.4
1175	222.4	80.92
1176	222.5	271.85
1177	222.6	748.7
1178	222.7	1571.39
1179	222.8	2563.33
1180	222.9	3436.56
1181	223	3963.04
1182	223.1	4022.75
1183	223.2	3595.85
1184	223.3	2777.55
1185	223.4	1772.82
1186	223.5	827.13
1187	223.6	166.55
1188	223.7	0
1189	223.9	0
1190	224	62.4
1191	224.1	193.21
1192	224.2	285.74
1193	224.3	179.47
1194	224.4	0
1195	225	0
1196	225.1	16.34
1197	225.2	10.3
1198	225.3	0
1199	225.5	0
1200	225.6	9.84
1201	225.7	0
1202	225.8	0
1203	225.9	47.55
1204	226	147.56
1205	226.1	221.57
1206	226.2	213.3
1207	226.3	132.4
1208	226.4	52.05
1209	226.5	17.91
1210	226.6	8.95
1211	226.7	0
1212	227.4	0
1213	227.5	24.89
1214	227.6	65.56
1215	227.7	92.67
1216	227.8	98.68
1217	227.9	88.31
1218	228	68.97
1219	228.1	47.85
1220	228.2	38.8
1221	228.3	45.33
1222	228.4	44.09
1223	228.5	10.73
1224	228.6	0
1225	228.7	0
1226	228.8	20.1
1227	228.9	53.66
1228	229	34.36
1229	229.1	0
1230	229.2	0
1231	229.3	4.76
1232	229.4	250.34
1233	229.5	695.3
1234	229.6	1332.52
1235	229.7	2063.17
1236	229.8	2707.81
1237	229.9	3104.13
1238	230	3248.53
1239	230.1	3274.2
1240	230.2	3163.19
1241	230.3	2678.41
1242	230.4	1753.09
1243	230.5	764.21
1244	230.6	222.52
1245	230.7	176.42
1246	230.8	315.49
1247	230.9	361.08
1248	231	279.03
1249	231.1	192.87
1250	231.2	167.57
1251	231.3	161.62
1252	231.4	110.2
1253	231.5	46.89
1254	231.6	0
1255	232	0
1256	232.1	5.14
1257	232.2	75.63
1258	232.3	114.53
1259	232.4	106.35
1260	232.5	53.29
1261	232.6	0
1262	232.8	0
1263	232.9	16.65
1264	233	54.27
1265	233.1	66.49
1266	233.2	53.28
1267	233.3	29.11
1268	233.4	3.09
1269	233.5	0
1270	233.6	0.43
1271	233.7	21.84
1272	233.8	29.3
1273	233.9	18.95
1274	234	10.13
1275	234.1	7.52
1276	234.2	2.93
1277	234.3	0
1278	234.4	0
1279	234.5	4.37
1280	234.6	25.69
1281	234.7	43.6
1282	234.8	37.79
1283	234.9	7.53
1284	235	0
1285	235.1	0
1286	235.2	19.69
1287	235.3	31.57
1288	235.4	14.87
1289	235.5	0
1290	235.6	0
1291	235.7	4.11
1292	235.8	21.57
1293	235.9	33.54
1294	236	18.64
1295	236.1	0
1296	236.9	0
1297	237	10.64
1298	237.1	0
1299	237.3	0
1300	237.4	2.98
1301	237.5	1.72
1302	237.6	0
1303	237.8	0
1304	237.9	3.87
1305	238	10.24
1306	238.1	10.75
1307	238.2	16.05
1308	238.3	25.92
1309	238.4	28.05
1310	238.5	8.49
1311	238.6	0
1312	238.7	0.6
1313	238.8	67.09
1314	238.9	134.39
1315	239	148.18
1316	239.1	113.24
1317	239.2	69.23
1318	239.3	41.42
1319	239.4	16.96
1320	239.5	7.51
1321	239.6	32.47
1322	239.7	69.36
1323	239.8	104.16
1324	239.9	118.43
1325	240	105.97
1326	240.1	73.62
1327	240.2	29.95
1328	240.3	0
1329	240.5	0
1330	240.6	13.19
1331	240.7	55.29
1332	240.8	87.48
1333	240.9	115.1
1334	241	144.45
1335	241.1	153.19
1336	241.2	113.99
1337	241.3	51.51
1338	241.4	5.51
1339	241.5	0
1340	242.5	0
1341	242.6	4.65
1342	242.7	39.21
1343	242.8	28.88
1344	242.9	0
1345	243.3	0
1346	243.4	0.37
1347	243.5	11.45
1348	243.6	3.72
1349	243.7	0
1350	243.9	0
1351	244	1.66
1352	244.1	3.74
1353	244.2	8.97
1354	244.3	17.21
1355	244.4	20.33
1356	244.5	11.35
1357	244.6	0
1358	245.6	0
1359	245.7	16.65
1360	245.8	33.32
1361	245.9	31.06
1362	246	11.89
1363	246.1	0
1364	246.5	0
1365	246.6	2.33
1366	246.7	10.48
1367	246.8	13.04
1368	246.9	2.11
1369	247	0
1370	247.1	0
1371	247.2	4.56
1372	247.3	25.83
1373	247.4	30.69
1374	247.5	25.03
1375	247.6	13.48
1376	247.7	2.49
1377	247.8	0.02
1378	247.9	6.69
1379	248	11.2
1380	248.1	5.15
1381	248.2	0
1382	248.7	0
1383	248.8	2.56
1384	248.9	92.92
1385	249	145.54
1386	249.1	120.87
1387	249.2	58.43
1388	249.3	14.74
1389	249.4	0
1390	249.5	0
1391	249.6	7.17
1392	249.7	28.79
1393	249.8	41.62
1394	249.9	42.07
1395	250	41.39
1396	250.1	49.19
1397	250.2	62.44
1398	250.3	72.45
1399	250.4	76.14
1400	250.5	67.91
1401	250.6	44.4
1402	250.7	20.77
1403	250.8	14.95
1404	250.9	25.73
1405	251	33.15
1406	251.1	25.95
1407	251.2	16.66
1408	251.3	27.06
1409	251.4	53.32
1410	251.5	85.91
1411	251.6	144.64
1412	251.7	250.46
1413	251.8	380.72
1414	251.9	479.95
1415	252	503.93
1416	252.1	446.15
1417	252.2	346.98
1418	252.3	226.82
1419	252.4	110.6
1420	252.5	14.23
1421	252.6	0
1422	252.7	46.45
1423	252.8	101.38
1424	252.9	107.09
1425	253	70.63
1426	253.1	31.73
1427	253.2	13.09
1428	253.3	9.56
1429	253.4	7.96
1430	253.5	4.36
1431	253.6	0
1432	253.8	0
1433	253.9	2.45
1434	254	4.61
1435	254.1	0.13
1436	254.2	0
1437	254.6	0
1438	254.7	7.86
1439	254.8	29.72
1440	254.9	28.1
1441	255	8.44
1442	255.1	0
1443	255.2	0
1444	255.3	2.41
1445	255.4	7.93
1446	255.5	8.48
1447	255.6	10.12
1448	255.7	10.11
1449	255.8	2.53
1450	255.9	0
1451	256.2	0
1452	256.3	4.83
1453	256.4	3.68
1454	256.5	0
1455	256.7	0
1456	256.8	9.78
1457	256.9	17.38
1458	257	16.36
1459	257.1	8.12
1460	257.2	0
1461	257.4	0
1462	257.5	1.45
1463	257.6	5.62
1464	257.7	11.02
1465	257.8	15.37
1466	257.9	14.41
1467	258	7.6
1468	258.1	0
1469	258.3	0
1470	258.4	8.17
1471	258.5	13.1
1472	258.6	7.79
1473	258.7	0
1474	259.2	0
1475	259.3	2.09
1476	259.4	0
1477	260.5	0
1478	260.6	38.5
1479	260.7	130.06
1480	260.8	152.91
1481	260.9	161.45
1482	261	186
1483	261.1	201.45
1484	261.2	171.88
1485	261.3	99.54
1486	261.4	20.3
1487	261.5	0
1488	261.8	0
1489	261.9	24.14
1490	262	40.9
1491	262.1	33.58
1492	262.2	13.06
1493	262.3	0
1494	262.4	0
1495	262.5	6.42
1496	262.6	54.43
1497	262.7	101.33
1498	262.8	111.05
1499	262.9	68.03
1500	263	0
1501	263.4	0
1502	263.5	19.93
1503	263.6	31.35
1504	263.7	33.55
1505	263.8	32.71
1506	263.9	40.16
1507	264	51.89
1508	264.1	50.29
1509	264.2	34.06
1510	264.3	22.49
1511	264.4	35.87
1512	264.5	61.67
1513	264.6	69.21
1514	264.7	51.81
1515	264.8	27.85
1516	264.9	16.01
1517	265	12.43
1518	265.1	7.53
1519	265.2	3.45
1520	265.3	6.6
1521	265.4	18.26
1522	265.5	35.44
1523	265.6	55.79
1524	265.7	79.43
1525	265.8	95.57
1526	265.9	84.15
1527	266	33.17
1528	266.1	0
1529	266.5	0
1530	266.6	2.42
1531	266.7	2.9
1532	266.8	0
1533	267	0
1534	267.1	1
1535	267.2	1.77
1536	267.3	3.37
1537	267.4	9.28
1538	267.5	19.02
1539	267.6	27
1540	267.7	28.41
1541	267.8	21.73
1542	267.9	9.09
1543	268	0
1544	268.2	0
1545	268.3	9.3
1546	268.4	11.23
1547	268.5	0
1548	269.1	0
1549	269.2	0.2
1550	269.3	0
1551	269.5	0
1552	269.6	2.89
1553	269.7	28.8
1554	269.8	53.65
1555	269.9	56.92
1556	270	35.5
1557	270.1	7.73
1558	270.2	0
1559	271	0
1560	271.1	12.25
1561	271.2	19.1
1562	271.3	14.16
1563	271.4	1.68
1564	271.5	0
1565	271.6	0
1566	271.7	0.23
1567	271.8	34.93
1568	271.9	76.68
1569	272	95.58
1570	272.1	73.21
1571	272.2	27.35
1572	272.3	0
1573	272.4	0
1574	272.5	5.23
1575	272.6	0
1576	273.5	0
1577	273.6	25.84
1578	273.7	38.13
1579	273.8	63.67
1580	273.9	128.15
1581	274	197.69
1582	274.1	211.82
1583	274.2	160.07
1584	274.3	95.14
1585	274.4	63.98
1586	274.5	56.06
1587	274.6	42.73
1588	274.7	24.9
1589	274.8	18.17
1590	274.9	25.82
1591	275	48.46
1592	275.1	64.35
1593	275.2	55.94
1594	275.3	28.86
1595	275.4	6.7
1596	275.5	3.56
1597	275.6	6.6
1598	275.7	6.42
1599	275.8	0.97
1600	275.9	0
1601	276	0
1602	276.1	7.97
1603	276.2	24.92
1604	276.3	35.29
1605	276.4	30.66
1606	276.5	14.68
1607	276.6	2.12
1608	276.7	0.34
1609	276.8	3.43
1610	276.9	2.2
1611	277	0
1612	277.4	0
1613	277.5	0.98
1614	277.6	0.47
1615	277.7	0
1616	278.2	0
1617	278.3	9.65
1618	278.4	42.14
1619	278.5	56.13
1620	278.6	43.04
1621	278.7	33.26
1622	278.8	54.77
1623	278.9	79.16
1624	279	68.25
1625	279.1	33.51
1626	279.2	10.62
1627	279.3	15.38
1628	279.4	26.87
1629	279.5	21.27
1630	279.6	7.15
1631	279.7	1.51
1632	279.8	13.6
1633	279.9	32.9
1634	280	47.39
1635	280.1	39.59
1636	280.2	30.54
1637	280.3	19.88
1638	280.4	0
1639	280.7	0
1640	280.8	107.08
1641	280.9	136.66
1642	281	50.3
1643	281.1	0
1644	281.2	0
1645	281.3	12.09
1646	281.4	0
1647	281.5	0
1648	281.6	13.25
1649	281.7	31.89
1650	281.8	24.68
1651	281.9	24.04
1652	282	73.2
1653	282.1	149.33
1654	282.2	188.79
1655	282.3	159.3
1656	282.4	98.43
1657	282.5	45.57
1658	282.6	2.16
1659	282.7	0
1660	283.6	0
1661	283.7	2.42
1662	283.8	3.44
1663	283.9	0
1664	285.2	0
1665	285.3	0.09
1666	285.4	0
1667	287.2	0
1668	287.3	9.11
1669	287.4	12.22
1670	287.5	10.64
1671	287.6	7.36
1672	287.7	0
1673	288.3	0
1674	288.4	5.04
1675	288.5	14.17
1676	288.6	21.95
1677	288.7	25.25
1678	288.8	21.46
1679	288.9	16.26
1680	289	20.28
1681	289.1	37.43
1682	289.2	55.91
1683	289.3	56.82
1684	289.4	40.67
1685	289.5	22.56
1686	289.6	27.51
1687	289.7	47.17
1688	289.8	55.12
1689	289.9	39.71
1690	290	14.26
1691	290.1	0
1692	291	0
1693	291.1	8.78
1694	291.2	16.59
1695	291.3	16.9
1696	291.4	18.91
1697	291.5	23.44
1698	291.6	25.07
1699	291.7	22.54
1700	291.8	21.76
1701	291.9	24.14
1702	292	21.59
1703	292.1	10.05
1704	292.2	0
1705	293.3	0
1706	293.4	3.35
1707	293.5	6.61
1708	293.6	6.27
1709	293.7	5.1
1710	293.8	4.76
1711	293.9	6.51
1712	294	9.34
1713	294.1	9.44
1714	294.2	4.78
1715	294.3	0
1716	294.5	0
1717	294.6	3.64
1718	294.7	9.87
1719	294.8	9.91
1720	294.9	2.25
1721	295	0
1722	295.5	0
1723	295.6	1.26
1724	295.7	9.39
1725	295.8	13.03
1726	295.9	3.77
1727	296	0
1728	296.3	0
1729	296.4	5.14
1730	296.5	124.82
1731	296.6	338.99
1732	296.7	571.93
1733	296.8	647.88
1734	296.9	467.36
1735	297	146.16
1736	297.1	0
1737	297.3	0
1738	297.4	188.93
1739	297.5	252.76
1740	297.6	116.46
1741	297.7	0
1742	298.5	0
1743	298.6	126.91
1744	298.7	268.7
1745	298.8	213.18
1746	298.9	0
1747	299.3	0
1748	299.4	92.39
1749	299.5	89.25
1750	299.6	0
1751	300	0
1752	300.1	69.74
1753	300.2	94.55
1754	300.3	74.19
1755	300.4	50.65
1756	300.5	35.49
1757	300.6	29.68
1758	300.7	17.46
1759	300.8	5.99
1760	300.9	9.1
1761	301	26.55
1762	301.1	37.18
1763	301.2	28.68
1764	301.3	7.48
1765	301.4	0
1766	303.5	0
1767	303.6	0.71
1768	303.7	21.35
1769	303.8	46.72
1770	303.9	80.25
1771	304	110.58
1772	304.1	113.94
1773	304.2	83.08
1774	304.3	48.94
1775	304.4	39.8
1776	304.5	44.99
1777	304.6	21.66
1778	304.7	0
1779	305	0
1780	305.1	19.39
1781	305.2	35.72
1782	305.3	32.53
1783	305.4	15.2
1784	305.5	0
1785	305.7	0
1786	305.8	4.64
1787	305.9	1.64
1788	306	0
1789	306.3	0
1790	306.4	2.55
1791	306.5	5.01
1792	306.6	8.95
1793	306.7	13.16
1794	306.8	14.37
1795	306.9	12.06
1796	307	9.03
1797	307.1	7.81
1798	307.2	7.69
1799	307.3	8.04
1800	307.4	10.72
1801	307.5	21.18
1802	307.6	31.79
1803	307.7	25.82
1804	307.8	0
1805	308.9	0
1806	309	1.1
1807	309.1	0
1808	310	0
1809	310.1	4.14
1810	310.2	5.91
1811	310.3	5.21
1812	310.4	5.45
1813	310.5	8.23
1814	310.6	12.2
1815	310.7	15.91
1816	310.8	19.8
1817	310.9	23.85
1818	311	25.64
1819	311.1	24.1
1820	311.2	21.88
1821	311.3	20.7
1822	311.4	17.58
1823	311.5	9.24
1824	311.6	0
1825	312	0
1826	312.1	1.13
1827	312.2	3.21
1828	312.3	2.03
1829	312.4	0
1830	312.6	0
1831	312.7	0.67
1832	312.8	0
1833	313.7	0
1834	313.8	2.75
1835	313.9	1.66
1836	314	0
1837	315	0
1838	315.1	0.64
1839	315.2	0
1840	315.3	0
1841	315.4	0.2
1842	315.5	1.72
1843	315.6	0
1844	315.9	0
1845	316	17.44
1846	316.1	34.68
1847	316.2	35.25
1848	316.3	22.88
1849	316.4	8.92
1850	316.5	0
1851	316.8	0
1852	316.9	8.97
1853	317	27.21
1854	317.1	28.22
1855	317.2	10.5
1856	317.3	0
1857	317.6	0
1858	317.7	1.17
1859	317.8	39.56
1860	317.9	119.82
1861	318	197.47
1862	318.1	212.89
1863	318.2	157.86
1864	318.3	88.72
1865	318.4	57.1
1866	318.5	47.77
1867	318.6	29.69
1868	318.7	7.03
1869	318.8	0
1870	318.9	0
1871	319	1.56
1872	319.1	0.12
1873	319.2	0
1874	319.3	5.51
1875	319.4	17.47
1876	319.5	24.51
1877	319.6	20.79
1878	319.7	12.08
1879	319.8	3.96
1880	319.9	0
1881	320.3	0
1882	320.4	0.2
1883	320.5	6.19
1884	320.6	12.16
1885	320.7	18.43
1886	320.8	24.11
1887	320.9	24.3
1888	321	17.16
1889	321.1	6.02
1890	321.2	0
1891	321.5	0
1892	321.6	6.34
1893	321.7	11.17
1894	321.8	10.18
1895	321.9	5.27
1896	322	1
1897	322.1	0.06
1898	322.2	1.07
1899	322.3	1.51
1900	322.4	1.06
1901	322.5	1.02
1902	322.6	1.41
1903	322.7	0.67
1904	322.8	0
1905	325	0
1906	325.1	0.08
1907	325.2	0.53
1908	325.3	0
1909	326.2	0
1910	326.3	1.76
1911	326.4	0.59
1912	326.5	0
1913	327.2	0
1914	327.3	7.3
1915	327.4	12.58
1916	327.5	17.08
1917	327.6	15.27
1918	327.7	7.31
1919	327.8	0
1920	328.1	0
1921	328.2	1.41
1922	328.3	0
1923	329.2	0
1924	329.3	2.22
1925	329.4	9.34
1926	329.5	17.7
1927	329.6	22.24
1928	329.7	15.98
1929	329.8	1.97
1930	329.9	0
1931	330.3	0
1932	330.4	1.32
1933	330.5	0
1934	330.7	0
1935	330.8	10.01
1936	330.9	25.32
1937	331	33.7
1938	331.1	27.05
1939	331.2	11.86
1940	331.3	1.43
1941	331.4	0
1942	331.5	0.18
1943	331.6	1.23
1944	331.7	1.52
1945	331.8	2.15
1946	331.9	2.74
1947	332	0.99
1948	332.1	0
1949	332.9	0
1950	333	1.19
1951	333.1	0
1952	333.5	0
1953	333.6	1.56
1954	333.7	0
1955	333.9	0
1956	334	7.55
1957	334.1	17.76
1958	334.2	20.47
1959	334.3	13.17
1960	334.4	3.57
1961	334.5	0.51
1962	334.6	3.54
1963	334.7	4.36
1964	334.8	0
1965	335.1	0
1966	335.2	0.11
1967	335.3	0
1968	335.6	0
1969	335.7	1.77
1970	335.8	2.2
1971	335.9	0.78
1972	336	0
1973	336.2	0
1974	336.3	0.86
1975	336.4	0
1976	336.9	0
1977	337	7.33
1978	337.1	29.66
1979	337.2	28.11
1980	337.3	12.34
1981	337.4	0
1982	337.6	0
1983	337.7	13.92
1984	337.8	32.27
1985	337.9	40.61
1986	338	32.84
1987	338.1	17.64
1988	338.2	5.52
1989	338.3	0
1990	338.7	0
1991	338.8	1.13
1992	338.9	0.14
1993	339	0
1994	339.1	0
1995	339.2	0.83
1996	339.3	2.58
1997	339.4	1.49
[truncated: 1,776 more rows]

## Sheet: Sheet7
+ESI Scan (rt: 9.23-9.66 min, 93 scans) Frag=100.0V CF=0.000 DF=0.000 4608-01.d Subtract
Index	X	Y
0	50	4.24
1	50.1	0.83
2	50.2	0.14
3	50.3	0.54
4	50.4	0.64
5	50.5	0.54
6	50.6	0.63
7	50.7	0.88
8	50.8	0.86
9	50.9	0.62
10	51	0.69
11	51.1	1.21
12	51.2	1.6
13	51.3	1.25
14	51.4	0.18
15	51.5	0
16	51.7	0
17	51.8	0.62
18	51.9	0.91
19	52	0.72
20	52.1	0.36
21	52.2	0.02
22	52.3	0
23	52.4	0
24	52.5	0.15
25	52.6	0.64
26	52.7	1.02
27	52.8	1.17
28	52.9	1.26
29	53	1.54
30	53.1	1.85
31	53.2	1.65
32	53.3	0.86
33	53.4	0.05
34	53.5	0
35	53.6	0.17
36	53.7	0.52
37	53.8	0.73
38	53.9	1
39	54	1.25
40	54.1	1.17
41	54.2	1.18
42	54.3	3.12
43	54.4	12.71
44	54.5	28.36
45	54.6	41.38
46	54.7	5.73
47	54.8	0
48	55.2	0
49	55.3	42.91
50	55.4	98.8
51	55.5	53.13
52	55.6	19.14
53	55.7	0.08
54	55.8	0
55	55.9	2.83
56	56	4.16
57	56.1	2.03
58	56.2	0
59	56.3	2.6
60	56.4	18.07
61	56.5	43.21
62	56.6	46.44
63	56.7	20.17
64	56.8	90.63
65	56.9	316.46
66	57	508.12
67	57.1	430.3
68	57.2	171.73
69	57.3	47.64
70	57.4	134.6
71	57.5	205.52
72	57.6	114.46
73	57.7	0
74	57.9	0
75	58	16.28
76	58.1	28.18
77	58.2	21.87
78	58.3	0
79	58.5	0
80	58.6	52.29
81	58.7	387.82
82	58.8	435.13
83	58.9	0
84	59.5	0
85	59.6	408.7
86	59.7	611.26
87	59.8	145.39
88	59.9	339.99
89	60	437.31
90	60.1	449.98
91	60.2	248.3
92	60.3	0
93	60.8	0
94	60.9	492.43
95	61	594.67
96	61.1	222.45
97	61.2	0
98	61.6	0
99	61.7	109.76
100	61.8	0
101	62.3	0
102	62.4	18.58
103	62.5	31.23
104	62.6	15.45
105	62.7	10.37
106	62.8	19.02
107	62.9	37.4
108	63	42.13
109	63.1	11.08
110	63.2	0
111	64	0
112	64.1	8.02
113	64.2	37.7
114	64.3	30.83
115	64.4	13.99
116	64.5	3.84
117	64.6	0.88
118	64.7	0.24
119	64.8	0
120	65.1	0
121	65.2	0.1
122	65.3	1.22
123	65.4	1.2
124	65.5	0.39
125	65.6	0
126	66.4	0
127	66.5	0.5
128	66.6	0.83
129	66.7	2.1
130	66.8	4.36
131	66.9	6.36
132	67	6.82
133	67.1	5.62
134	67.2	3.16
135	67.3	0
136	67.6	0
137	67.7	0.92
138	67.8	3.26
139	67.9	3.68
140	68	3.26
141	68.1	3.02
142	68.2	4.64
143	68.3	12.04
144	68.4	19.78
145	68.5	28.77
146	68.6	0
147	69.1	0
148	69.2	108.61
149	69.3	78.75
150	69.4	0
151	69.7	0
152	69.8	68.82
153	69.9	87.53
154	70	57.87
155	70.1	23.25
156	70.2	0
157	71.2	0
158	71.3	262.96
159	71.4	289.47
160	71.5	132.83
161	71.6	0
162	72.3	0
163	72.4	51.6
164	72.5	199.97
165	72.6	918.99
166	72.7	1542.02
167	72.8	1835.72
168	72.9	1450.79
169	73	438.92
170	73.1	0
171	74.2	0
172	74.3	114.36
173	74.4	268.64
174	74.5	249.16
175	74.6	133.66
176	74.7	65.52
177	74.8	111.89
178	74.9	159.16
179	75	103.67
180	75.1	0
181	75.9	0
182	76	48.83
183	76.1	41.39
184	76.2	0
185	76.8	0
186	76.9	11.12
187	77	52.95
188	77.1	84.73
189	77.2	105.92
190	77.3	111.52
191	77.4	109.19
192	77.5	115.05
193	77.6	131.68
194	77.7	145.27
195	77.8	170.58
196	77.9	152.05
197	78	16.97
198	78.1	0
199	78.2	0
200	78.3	257.02
201	78.4	445.16
202	78.5	275.42
203	78.6	0
204	79.1	0
205	79.2	63.23
206	79.3	57.62
207	79.4	0
208	79.6	0
209	79.7	2.94
210	79.8	20.65
211	79.9	45.92
212	80	72.93
213	80.1	67.38
214	80.2	31.4
215	80.3	4.89
216	80.4	9.99
217	80.5	39.19
218	80.6	132.43
219	80.7	251.57
220	80.8	285.17
221	80.9	165.14
222	81	0
223	81.1	0
224	81.2	70.41
225	81.3	221.93
226	81.4	254.89
227	81.5	174.4
228	81.6	57.46
229	81.7	0
230	82.5	0
231	82.6	14.63
232	82.7	32.53
233	82.8	3.76
234	82.9	0
235	83.2	0
236	83.3	73.81
237	83.4	113.52
238	83.5	3.35
239	83.6	0
240	83.8	0
241	83.9	72.39
242	84	116.62
243	84.1	87.99
244	84.2	17.04
245	84.3	0
246	84.4	0
247	84.5	95.06
248	84.6	186.73
249	84.7	215.92
250	84.8	214.96
251	84.9	192.84
252	85	88.51
253	85.1	0
254	85.5	0
255	85.6	35.39
256	85.7	45.55
257	85.8	31.56
258	85.9	22.9
259	86	27.49
260	86.1	31.52
261	86.2	30.75
262	86.3	23.64
263	86.4	0
264	86.7	0
265	86.8	66.46
266	86.9	56.73
267	87	0
268	87.4	0
269	87.5	81.2
270	87.6	91.53
271	87.7	59.73
272	87.8	53.28
273	87.9	68.93
274	88	65.93
275	88.1	15.86
276	88.2	0
277	88.3	0
278	88.4	42.4
279	88.5	624.83
280	88.6	766.07
281	88.7	0
282	89	0
283	89.1	483.19
284	89.2	852.79
285	89.3	255.37
286	89.4	0
287	89.7	0
288	89.8	28.09
289	89.9	242.16
290	90	272.98
291	90.1	77.35
292	90.2	30.92
293	90.3	229.67
294	90.4	389.12
295	90.5	260.45
296	90.6	0
297	92.5	0
298	92.6	17.31
299	92.7	55.65
300	92.8	97.23
301	92.9	131.21
302	93	142.31
303	93.1	115.62
304	93.2	55.8
305	93.3	0
306	93.6	0
307	93.7	4.19
308	93.8	6.85
309	93.9	4.26
310	94	1.42
311	94.1	0.43
312	94.2	1.34
313	94.3	4.76
314	94.4	11.37
315	94.5	23.01
316	94.6	42.91
317	94.7	73.95
318	94.8	97.76
319	94.9	70.27
320	95	0
321	95.5	0
322	95.6	29.71
323	95.7	0
324	96.4	0
325	96.5	22.38
326	96.6	62.04
327	96.7	31.71
328	96.8	0
329	97.4	0
330	97.5	125.4
331	97.6	151.29
332	97.7	108.5
333	97.8	31.8
334	97.9	0
335	98	63.56
336	98.1	231.49
337	98.2	403.37
338	98.3	423.11
339	98.4	209.22
340	98.5	0
341	99.1	0
342	99.2	125.44
343	99.3	581.96
344	99.4	536.71
345	99.5	263.21
346	99.6	0.25
347	99.7	0
348	100.3	0
349	100.4	174.95
350	100.5	404.89
351	100.6	236.27
352	100.7	0
353	101.1	0
354	101.2	74.67
355	101.3	0
356	101.8	0
357	101.9	68.22
358	102	187.3
359	102.1	170.22
360	102.2	194.83
361	102.3	291.5
362	102.4	262.89
363	102.5	87.93
364	102.6	0
365	102.7	37.5
366	102.8	101.71
367	102.9	138.59
368	103	220.87
369	103.1	327
370	103.2	362.14
371	103.3	276.09
372	103.4	111.64
373	103.5	0
374	103.8	0
375	103.9	42.69
376	104	54.54
377	104.1	19.03
378	104.2	0
379	104.8	0
380	104.9	96.62
381	105	120.15
382	105.1	0
383	105.4	0
384	105.5	83.43
385	105.6	127.72
386	105.7	128.22
387	105.8	162.32
388	105.9	185.6
389	106	179.14
390	106.1	149.09
391	106.2	136.69
392	106.3	127.98
393	106.4	97.91
394	106.5	64.96
395	106.6	113.72
396	106.7	110.66
397	106.8	0
398	107.3	0
399	107.4	70.62
400	107.5	155.74
401	107.6	214.44
402	107.7	203.35
403	107.8	153.88
404	107.9	0
405	108.7	0
406	108.8	40.15
407	108.9	142.22
408	109	126.86
409	109.1	0
410	109.5	0
411	109.6	22.12
412	109.7	49.61
413	109.8	56.08
414	109.9	40.22
415	110	7.25
416	110.1	0
417	110.4	0
418	110.5	15.94
419	110.6	1.54
420	110.7	0
421	111.6	0
422	111.7	31.93
423	111.8	38.66
424	111.9	36.74
425	112	6.33
426	112.1	0
427	112.5	0
428	112.6	23.29
429	112.7	133.99
430	112.8	205.73
431	112.9	105.2
432	113	0
433	113.2	0
434	113.3	119.83
435	113.4	226.45
436	113.5	173.04
437	113.6	51.99
438	113.7	0
439	114.2	0
440	114.3	81.24
441	114.4	100.86
442	114.5	0
443	115.6	0
444	115.7	42.41
445	115.8	0
446	115.9	0
447	116	20.18
448	116.1	87.09
449	116.2	67.23
450	116.3	0
451	116.5	0
452	116.6	4.03
453	116.7	227.19
454	116.8	375.03
455	116.9	368.38
456	117	274.47
457	117.1	190.19
458	117.2	137.45
459	117.3	106.31
460	117.4	93.78
461	117.5	84.05
462	117.6	65.36
463	117.7	19.68
464	117.8	9.09
465	117.9	42.36
466	118	78.72
467	118.1	74.05
468	118.2	3.02
469	118.3	0
470	119	0
471	119.1	78.33
472	119.2	0
473	119.5	0
474	119.6	82.76
475	119.7	113.46
476	119.8	123.34
477	119.9	77.18
478	120	53.96
479	120.1	25.61
480	120.2	0
481	120.3	0
482	120.4	8.37
483	120.5	0
484	120.7	0
485	120.8	18.99
486	120.9	149.74
487	121	108.03
488	121.1	0
489	121.6	0
490	121.7	188.52
491	121.8	229.54
492	121.9	37.91
493	122	0
494	122.3	0
495	122.4	2.39
496	122.5	3.62
497	122.6	37.73
498	122.7	123.79
499	122.8	147.15
500	122.9	0
501	123.2	0
502	123.3	0.33
503	123.4	95.36
504	123.5	35.38
505	123.6	0
506	124.6	0
507	124.7	18.8
508	124.8	14.54
509	124.9	0
510	125	0
511	125.1	12.1
512	125.2	42.05
513	125.3	21.01
514	125.4	0
515	125.6	0
516	125.7	10.95
517	125.8	64.24
518	125.9	86.22
519	126	89.87
520	126.1	86.38
521	126.2	68.8
522	126.3	33.01
523	126.4	0
524	127	0
525	127.1	92.72
526	127.2	166.92
527	127.3	143.68
528	127.4	84.38
529	127.5	58.8
530	127.6	61.91
531	127.7	44.97
532	127.8	18.7
533	127.9	16.4
534	128	45.04
535	128.1	69.67
536	128.2	44.76
537	128.3	0
538	128.5	0
539	128.6	12.19
540	128.7	195.73
541	128.8	242.13
542	128.9	99.55
543	129	0
544	129.1	0
545	129.2	50.13
546	129.3	142.4
547	129.4	133.67
548	129.5	55.89
549	129.6	0
550	129.9	0
551	130	10.17
552	130.1	0
553	130.5	0
554	130.6	100.59
555	130.7	432.06
556	130.8	591.78
557	130.9	459.34
558	131	136.84
559	131.1	0
560	131.2	0
561	131.3	156.9
562	131.4	156.81
563	131.5	0
564	131.8	0
565	131.9	45.75
566	132	66.46
567	132.1	84.42
568	132.2	105.89
569	132.3	81.32
570	132.4	0
571	132.7	0
572	132.8	97.5
573	132.9	174.07
574	133	111.12
575	133.1	0
576	133.4	0
577	133.5	50.7
578	133.6	76.98
579	133.7	64.32
580	133.8	59.76
581	133.9	17.26
582	134	0
583	134.4	0
584	134.5	128.88
585	134.6	140.36
586	134.7	71.38
587	134.8	0
588	135.1	0
589	135.2	15.92
590	135.3	186.57
591	135.4	174.34
592	135.5	30.78
593	135.6	0
594	136	0
595	136.1	70.42
596	136.2	179.81
597	136.3	214.71
598	136.4	222.5
599	136.5	145.45
600	136.6	80.31
601	136.7	0
602	137.2	0
603	137.3	31.68
604	137.4	0
605	138	0
606	138.1	13.71
607	138.2	88.03
608	138.3	139.72
609	138.4	194.43
610	138.5	239.43
611	138.6	230.61
612	138.7	151.58
613	138.8	0
614	140	0
615	140.1	58.85
616	140.2	80.79
617	140.3	77.9
618	140.4	52.33
619	140.5	35.07
620	140.6	0
621	141	0
622	141.1	8.28
623	141.2	21.24
624	141.3	0
625	141.9	0
626	142	18.2
627	142.1	244.2
628	142.2	298.69
629	142.3	269.05
630	142.4	302.43
631	142.5	366.24
632	142.6	289.39
633	142.7	90.91
634	142.8	0
635	142.9	0
636	143	120.38
637	143.1	123.88
638	143.2	0
639	143.5	0
640	143.6	55.24
641	143.7	91.3
642	143.8	8.06
643	143.9	0
644	144.2	0
645	144.3	99.94
646	144.4	180.73
647	144.5	55.64
648	144.6	0
649	145.8	0
650	145.9	104.58
651	146	125.86
652	146.1	86.77
653	146.2	21.81
654	146.3	0
655	146.5	0
656	146.6	78.13
657	146.7	186.94
658	146.8	242.3
659	146.9	195.86
660	147	68.75
661	147.1	0
662	147.2	0
663	147.3	5.49
664	147.4	62.91
665	147.5	57.13
666	147.6	13.36
667	147.7	0
668	148.4	0
669	148.5	54
670	148.6	136.41
671	148.7	178.36
672	148.8	185.05
673	148.9	188.03
674	149	203.15
675	149.1	210.89
676	149.2	166.59
677	149.3	53.7
678	149.4	0
679	149.6	0
680	149.7	24.96
681	149.8	34.5
682	149.9	0
683	150.3	0
684	150.4	64.88
685	150.5	111.53
686	150.6	49.53
687	150.7	0
688	151.2	0
689	151.3	55.19
690	151.4	197.23
691	151.5	168.81
692	151.6	87.64
693	151.7	62.1
694	151.8	54.8
695	151.9	60.19
696	152	52.59
697	152.1	13.03
698	152.2	0
699	152.3	0
700	152.4	54.38
701	152.5	207.87
702	152.6	221.39
703	152.7	0
704	153.5	0
705	153.6	109.45
706	153.7	22.62
707	153.8	60.29
708	153.9	0
709	154.3	0
710	154.4	66.26
711	154.5	105.68
712	154.6	139.51
713	154.7	155.11
714	154.8	136
715	154.9	73.88
716	155	0
717	155.2	0
718	155.3	50.38
719	155.4	80.93
720	155.5	73.81
721	155.6	61.16
722	155.7	76.92
723	155.8	110.04
724	155.9	100.7
725	156	1.18
726	156.1	0
727	156.4	0
728	156.5	76.67
729	156.6	0
730	157.2	0
731	157.3	68.66
732	157.4	120.14
733	157.5	55.21
734	157.6	1.55
735	157.7	31.5
736	157.8	104.25
737	157.9	152.73
738	158	177.21
739	158.1	217.79
740	158.2	282.62
741	158.3	328.2
742	158.4	284.55
743	158.5	148.15
744	158.6	0
745	158.9	0
746	159	38.32
747	159.1	41.84
748	159.2	0.36
749	159.3	0
750	159.4	0
751	159.5	3.98
752	159.6	15.6
753	159.7	17.04
754	159.8	0
755	161.3	0
756	161.4	143.55
757	161.5	27.78
758	161.6	0
759	162	0
760	162.1	5.78
761	162.2	91.92
762	162.3	152.67
763	162.4	136.32
764	162.5	60.76
765	162.6	0
766	163.1	0
767	163.2	16.1
768	163.3	24.77
769	163.4	4.37
770	163.5	0
771	164	0
772	164.1	27.48
773	164.2	58.56
774	164.3	55.53
775	164.4	37.42
776	164.5	29.96
777	164.6	46.61
778	164.7	81.6
779	164.8	117.56
780	164.9	137.56
781	165	131.72
782	165.1	100.17
783	165.2	51.8
784	165.3	6.59
785	165.4	0
786	165.5	0
787	165.6	1.36
788	165.7	9.88
789	165.8	5.73
790	165.9	0
791	166.4	0
792	166.5	31.35
793	166.6	15.08
794	166.7	0
795	167	0
796	167.1	0.91
797	167.2	29.21
798	167.3	15.36
799	167.4	9.91
800	167.5	5.25
801	167.6	4.97
802	167.7	8.59
803	167.8	12.34
804	167.9	10.06
805	168	0
806	168.3	0
807	168.4	2.31
808	168.5	17.04
809	168.6	29.14
810	168.7	43.67
811	168.8	52.66
812	168.9	40.62
813	169	0
814	169.5	0
815	169.6	11.4
816	169.7	0
817	170.4	0
818	170.5	90.26
819	170.6	244.85
820	170.7	352.87
821	170.8	333.75
822	170.9	253.65
823	171	130.15
824	171.1	0
825	171.6	0
826	171.7	0.76
827	171.8	0
828	171.9	6.79
829	172	31.74
830	172.1	34.7
831	172.2	25.73
832	172.3	0
833	172.6	0
834	172.7	18.32
835	172.8	129.05
836	172.9	131.78
837	173	64.77
838	173.1	0
839	173.3	0
840	173.4	9.02
841	173.5	9.23
842	173.6	24.9
843	173.7	48.3
844	173.8	68.66
845	173.9	77.66
846	174	65.74
847	174.1	32.12
848	174.2	0
849	175.4	0
850	175.5	27.13
851	175.6	39.06
852	175.7	24.89
853	175.8	0
854	176.4	0
855	176.5	51.48
856	176.6	117.75
857	176.7	60.93
858	176.8	0
859	177.1	0
860	177.2	161.6
861	177.3	221.37
862	177.4	174.39
863	177.5	116.74
864	177.6	78.15
865	177.7	58.83
866	177.8	41.39
867	177.9	22.42
868	178	14.68
869	178.1	12.19
870	178.2	0
871	178.9	0
872	179	63.88
873	179.1	149.94
874	179.2	151.49
875	179.3	88.57
876	179.4	17.23
877	179.5	0
878	180.2	0
879	180.3	31.33
880	180.4	47.88
881	180.5	16.59
882	180.6	0
883	181.1	0
884	181.2	39.59
885	181.3	50.6
886	181.4	33.32
887	181.5	12.34
888	181.6	0
889	182	0
890	182.1	1.25
891	182.2	0
892	182.7	0
893	182.8	48.3
894	182.9	1.58
895	183	0
896	184	0
897	184.1	1.83
898	184.2	16.47
899	184.3	14.6
900	184.4	10.06
901	184.5	0
902	185.2	0
903	185.3	4.11
904	185.4	40.61
905	185.5	64.34
906	185.6	100.3
907	185.7	158.29
908	185.8	233.56
909	185.9	317.97
910	186	382.32
911	186.1	391.54
912	186.2	334.32
913	186.3	244.75
914	186.4	170.51
915	186.5	146.4
916	186.6	179.74
917	186.7	244.26
918	186.8	297.22
919	186.9	305.19
920	187	238.29
921	187.1	98.41
922	187.2	0
923	187.4	0
924	187.5	9.65
925	187.6	20.64
926	187.7	12.18
927	187.8	8.99
928	187.9	12.97
929	188	6.96
930	188.1	0
931	188.5	0
932	188.6	34.64
933	188.7	11.35
934	188.8	0
935	189	0
936	189.1	73.88
937	189.2	150.22
938	189.3	111.25
939	189.4	57.58
940	189.5	21.72
941	189.6	7.02
942	189.7	0
943	189.8	0
944	189.9	31.36
945	190	89.82
946	190.1	125.12
947	190.2	101.57
948	190.3	53
949	190.4	0
950	190.9	0
951	191	61.36
952	191.1	0
953	191.6	0
954	191.7	13.82
955	191.8	18.76
956	191.9	32.63
957	192	46.33
958	192.1	38.64
959	192.2	20.05
960	192.3	14.93
961	192.4	25.73
962	192.5	34.21
963	192.6	23.89
964	192.7	0
965	193.2	0
966	193.3	35.42
967	193.4	44.66
968	193.5	0
969	193.8	0
970	193.9	56.41
971	194	88.98
972	194.1	28.12
973	194.2	6.17
974	194.3	77.81
975	194.4	158.55
976	194.5	136.93
977	194.6	20.14
978	194.7	0
979	195.1	0
980	195.2	42.37
981	195.3	95.49
982	195.4	77.95
983	195.5	31.38
984	195.6	6.25
985	195.7	4.51
986	195.8	18.77
987	195.9	30.1
988	196	29.63
989	196.1	22.22
990	196.2	18.31
991	196.3	24.61
992	196.4	28.23
993	196.5	9.72
994	196.6	0
995	196.8	0
996	196.9	0.28
997	197	19.47
998	197.1	0
999	197.3	0
1000	197.4	2.97
1001	197.5	11.25
1002	197.6	0
1003	197.9	0
1004	198	2.14
1005	198.1	16.15
1006	198.2	30.26
1007	198.3	37.19
1008	198.4	33.76
1009	198.5	22.54
1010	198.6	12.65
1011	198.7	14.01
1012	198.8	29.36
1013	198.9	39.73
1014	199	25.04
1015	199.1	0
1016	199.3	0
1017	199.4	22.06
1018	199.5	38.01
1019	199.6	39.48
1020	199.7	41.4
1021	199.8	34.8
1022	199.9	8.87
1023	200	0
1024	200.2	0
1025	200.3	46.11
1026	200.4	58.53
1027	200.5	0
1028	202	0
1029	202.1	24.76
1030	202.2	20.52
1031	202.3	0
1032	202.7	0
1033	202.8	86.56
1034	202.9	119.66
1035	203	83.94
1036	203.1	12.59
1037	203.2	0
1038	204.8	0
1039	204.9	9.59
1040	205	94.92
1041	205.1	192.28
1042	205.2	218.92
1043	205.3	166.2
1044	205.4	86.55
1045	205.5	43.67
1046	205.6	31.22
1047	205.7	28.46
1048	205.8	20.48
1049	205.9	9.03
1050	206	0
1051	206.3	0
1052	206.4	3.66
1053	206.5	0
1054	207.3	0
1055	207.4	19.12
1056	207.5	157.44
1057	207.6	144.64
1058	207.7	68.48
1059	207.8	0
1060	208.1	0
1061	208.2	2.22
1062	208.3	9
1063	208.4	0
1064	209.1	0
1065	209.2	59.51
1066	209.3	82.69
1067	209.4	58.67
1068	209.5	24.47
1069	209.6	9.67
1070	209.7	12.31
1071	209.8	22.91
1072	209.9	30.65
1073	210	31.22
1074	210.1	28.5
1075	210.2	30.58
1076	210.3	38.06
1077	210.4	38
1078	210.5	11.65
1079	210.6	0
1080	210.9	0
1081	211	8.87
1082	211.1	46.87
1083	211.2	47.43
1084	211.3	23.36
1085	211.4	2.46
1086	211.5	4.02
1087	211.6	28.93
1088	211.7	60.9
1089	211.8	72.95
1090	211.9	40.84
1091	212	0
1092	212.3	0
1093	212.4	38.78
1094	212.5	51.69
1095	212.6	37.24
1096	212.7	23.93
1097	212.8	16.78
1098	212.9	11.99
1099	213	6.06
1100	213.1	1.25
1101	213.2	0.34
1102	213.3	6.93
1103	213.4	22.33
1104	213.5	43.15
1105	213.6	59.19
1106	213.7	60.97
1107	213.8	47.84
1108	213.9	20.59
1109	214	0
1110	215.1	0
1111	215.2	46.22
1112	215.3	60.98
1113	215.4	19.32
1114	215.5	0
1115	216.4	0
1116	216.5	11.28
1117	216.6	59.54
1118	216.7	53.85
1119	216.8	0
1120	217.4	0
1121	217.5	10.71
1122	217.6	21.77
1123	217.7	0
1124	218.3	0
1125	218.4	25.7
1126	218.5	9.49
1127	218.6	0
1128	219.2	0
1129	219.3	23.82
1130	219.4	13.23
1131	219.5	0
1132	220.2	0
1133	220.3	15.59
1134	220.4	67.72
1135	220.5	81.85
1136	220.6	54.62
1137	220.7	5.97
1138	220.8	0
1139	221	0
1140	221.1	12.77
1141	221.2	22.8
1142	221.3	0
1143	221.5	0
1144	221.6	17.46
1145	221.7	59.74
1146	221.8	75.93
1147	221.9	95.2
1148	222	104.22
1149	222.1	104.27
1150	222.2	0
1151	222.4	0
1152	222.5	470.21
1153	222.6	1216.54
1154	222.7	1064.04
1155	222.8	0
1156	223.1	0
1157	223.2	227.4
1158	223.3	136.23
1159	223.4	0
1160	223.6	0
1161	223.7	42.67
1162	223.8	123.58
1163	223.9	269.08
1164	224	427.45
1165	224.1	469.44
1166	224.2	280.43
1167	224.3	0
1168	224.7	0
1169	224.8	39.23
1170	224.9	110.88
1171	225	147.35
1172	225.1	72.75
1173	225.2	0
1174	225.4	0
1175	225.5	103.13
1176	225.6	108.4
1177	225.7	73.33
1178	225.8	0
1179	226.5	0
1180	226.6	9.24
1181	226.7	65.42
1182	226.8	77.85
1183	226.9	73.02
1184	227	58.32
1185	227.1	48.83
1186	227.2	40.54
1187	227.3	14.65
1188	227.4	0
1189	228.7	0
1190	228.8	18.14
1191	228.9	0.36
1192	229	0
1193	229.4	0
1194	229.5	244.39
1195	229.6	726.6
1196	229.7	1392.48
1197	229.8	2078.31
1198	229.9	2604.48
1199	230	2926
1200	230.1	3092.19
1201	230.2	3132.61
1202	230.3	2983.31
1203	230.4	2527.01
1204	230.5	1756.96
1205	230.6	899.16
1206	230.7	318.24
1207	230.8	176.58
1208	230.9	300.6
1209	231	464.18
1210	231.1	517.05
1211	231.2	475.48
1212	231.3	401.96
1213	231.4	313.95
1214	231.5	209.24
1215	231.6	104.36
1216	231.7	42.75
1217	231.8	40.93
1218	231.9	63.47
1219	232	85.35
1220	232.1	92.47
1221	232.2	73.71
1222	232.3	38.08
1223	232.4	0
1224	232.9	0
1225	233	14.52
1226	233.1	0
1227	233.3	0
1228	233.4	4.64
1229	233.5	16.37
1230	233.6	23.39
1231	233.7	30.36
1232	233.8	31.13
1233	233.9	18.01
1234	234	0
1235	234.3	0
1236	234.4	6.82
1237	234.5	45.34
1238	234.6	0
1239	235	0
1240	235.1	38.55
1241	235.2	42.66
1242	235.3	33.16
1243	235.4	14.04
1244	235.5	0.8
1245	235.6	0
1246	235.7	3.43
1247	235.8	5.34
1248	235.9	0
1249	236.3	0
1250	236.4	13.69
1251	236.5	49.78
1252	236.6	75.06
1253	236.7	12.07
1254	236.8	0
1255	237.4	0
1256	237.5	34.62
1257	237.6	40.24
1258	237.7	42.36
1259	237.8	35.93
1260	237.9	38.35
1261	238	39.73
1262	238.1	34.82
1263	238.2	27.95
1264	238.3	27.11
1265	238.4	30.89
1266	238.5	29.8
1267	238.6	24.65
1268	238.7	22.17
1269	238.8	11.83
1270	238.9	0
1271	239.4	0
1272	239.5	32.64
1273	239.6	56.18
1274	239.7	43.87
1275	239.8	7.13
1276	239.9	0
1277	240	0
1278	240.1	24.17
1279	240.2	51.11
1280	240.3	52.5
1281	240.4	33.59
1282	240.5	5.43
1283	240.6	0
1284	240.9	0
1285	241	0.05
1286	241.1	14.17
1287	241.2	25.76
1288	241.3	35.12
1289	241.4	32.64
1290	241.5	23.36
1291	241.6	30.97
1292	241.7	51.88
1293	241.8	64.76
1294	241.9	63
1295	242	75.23
1296	242.1	120.24
1297	242.2	174.11
1298	242.3	185.63
1299	242.4	137.18
1300	242.5	67.4
1301	242.6	21.06
1302	242.7	11.93
1303	242.8	19.73
1304	242.9	20.75
1305	243	18.04
1306	243.1	20.97
1307	243.2	27.78
1308	243.3	29.85
1309	243.4	36.07
1310	243.5	79.84
1311	243.6	158.23
1312	243.7	228.07
1313	243.8	279.1
1314	243.9	341.44
1315	244	413.35
1316	244.1	446.26
1317	244.2	429.39
1318	244.3	401.21
1319	244.4	368.36
1320	244.5	290.58
1321	244.6	164.8
1322	244.7	51.2
1323	244.8	11.93
1324	244.9	26.24
1325	245	62.82
1326	245.1	82.29
1327	245.2	70.96
1328	245.3	46.64
1329	245.4	28.61
1330	245.5	18.42
1331	245.6	12.78
1332	245.7	13.19
1333	245.8	19.7
1334	245.9	26.65
1335	246	30.63
1336	246.1	30.5
1337	246.2	26.19
1338	246.3	18.35
1339	246.4	11.62
1340	246.5	12.07
1341	246.6	17.71
1342	246.7	22.81
1343	246.8	23.63
1344	246.9	19.45
1345	247	17.26
1346	247.1	23.6
1347	247.2	34.11
1348	247.3	37.1
1349	247.4	32.12
1350	247.5	26.14
1351	247.6	27.23
1352	247.7	13.78
1353	247.8	0
1354	248.2	0
1355	248.3	15.43
1356	248.4	44.35
1357	248.5	61.47
1358	248.6	86.83
1359	248.7	106.03
1360	248.8	98.34
1361	248.9	65.7
1362	249	34.67
1363	249.1	15.92
1364	249.2	0
1365	250.6	0
1366	250.7	15.73
1367	250.8	27.78
1368	250.9	6.26
1369	251	0
1370	251.3	0
1371	251.4	9.43
1372	251.5	28.41
1373	251.6	21.33
1374	251.7	0
1375	252.4	0
1376	252.5	38.86
1377	252.6	72.97
1378	252.7	83.5
1379	252.8	76.21
1380	252.9	60.66
1381	253	50.37
1382	253.1	55.61
1383	253.2	62.8
1384	253.3	52.33
1385	253.4	22.45
1386	253.5	0
1387	253.7	0
1388	253.8	8.68
1389	253.9	21.08
1390	254	32.59
1391	254.1	38.01
1392	254.2	32.91
1393	254.3	22.75
1394	254.4	20.86
1395	254.5	31.62
1396	254.6	38.52
1397	254.7	22.46
1398	254.8	0
1399	255.2	0
1400	255.3	1.5
1401	255.4	102.8
1402	255.5	274.55
1403	255.6	479.94
1404	255.7	688.07
1405	255.8	932.23
1406	255.9	1265.65
1407	256	1648.7
1408	256.1	1930.76
1409	256.2	1980.73
1410	256.3	1770.65
1411	256.4	1341.79
1412	256.5	809.25
1413	256.6	352.39
1414	256.7	135.86
1415	256.8	122.3
1416	256.9	202.74
1417	257	274.54
1418	257.1	284.84
1419	257.2	240.99
1420	257.3	184.24
1421	257.4	132.92
1422	257.5	82.51
1423	257.6	36.49
1424	257.7	8.47
1425	257.8	4.97
1426	257.9	11.62
1427	258	13.86
1428	258.1	10.95
1429	258.2	8.47
1430	258.3	9.78
1431	258.4	11.08
1432	258.5	6.85
1433	258.6	0
1434	259.2	0
1435	259.3	6.65
1436	259.4	17.13
1437	259.5	17.54
1438	259.6	15.74
1439	259.7	13.46
1440	259.8	10.56
1441	259.9	8.5
1442	260	7.92
1443	260.1	7.37
1444	260.2	5.61
1445	260.3	3.31
1446	260.4	2.36
1447	260.5	4.58
1448	260.6	10.6
1449	260.7	18.02
1450	260.8	22.72
1451	260.9	22.51
1452	261	14.98
1453	261.1	0
1454	261.5	0
1455	261.6	24.27
1456	261.7	34.9
1457	261.8	32.13
1458	261.9	23.37
1459	262	16.48
1460	262.1	16.01
1461	262.2	15.26
1462	262.3	0
1463	262.7	0
1464	262.8	6.58
1465	262.9	0
1466	263.3	0
1467	263.4	10.23
1468	263.5	3.92
1469	263.6	5.59
1470	263.7	15.86
1471	263.8	21.63
1472	263.9	17.51
1473	264	8.8
1474	264.1	2.68
1475	264.2	1.08
1476	264.3	1.42
1477	264.4	1.74
1478	264.5	3.36
1479	264.6	10.47
1480	264.7	19.93
1481	264.8	20.15
1482	264.9	0
1483	265.2	0
1484	265.3	7.89
1485	265.4	21.87
1486	265.5	18.26
1487	265.6	0
1488	266.4	0
1489	266.5	1.79
1490	266.6	0
1491	266.9	0
1492	267	13.74
1493	267.1	14.27
1494	267.2	7.96
1495	267.3	3.24
1496	267.4	2.16
1497	267.5	2.41
1498	267.6	0.3
1499	267.7	0
1500	267.8	0
1501	267.9	4.69
1502	268	17.54
1503	268.1	23.97
1504	268.2	19.42
1505	268.3	10.41
1506	268.4	6.62
1507	268.5	12.76
1508	268.6	22.15
1509	268.7	24.83
1510	268.8	16.94
1511	268.9	2.29
1512	269	0
1513	269.4	0
1514	269.5	1.78
1515	269.6	3.22
1516	269.7	4.7
1517	269.8	7.59
1518	269.9	10.53
1519	270	13.03
1520	270.1	14.51
1521	270.2	13.11
1522	270.3	8.68
1523	270.4	5.27
1524	270.5	7.48
1525	270.6	14.46
1526	270.7	20.21
1527	270.8	18.27
1528	270.9	8.47
1529	271	0
1530	271.2	0
1531	271.3	1.73
1532	271.4	3.98
1533	271.5	35.42
1534	271.6	111.29
1535	271.7	216.03
1536	271.8	330.44
1537	271.9	456.76
1538	272	586.55
1539	272.1	680.94
1540	272.2	703.12
1541	272.3	647.96
1542	272.4	535.77
1543	272.5	395.03
1544	272.6	279.17
1545	272.7	248.82
1546	272.8	315.69
1547	272.9	473.54
1548	273	745.5
1549	273.1	971.8
1550	273.2	891.47
1551	273.3	616.2
1552	273.4	2569.94
1553	273.5	17222.9
1554	273.6	51220
1555	273.7	102805
1556	273.8	162532
1557	273.9	220102
1558	274	267381
1559	274.1	298186
1560	274.2	309123
1561	274.3	297131
1562	274.4	256361
1563	274.5	186822
1564	274.6	107330
1565	274.7	47915.4
1566	274.8	24695.9
1567	274.9	29143.1
1568	275	42394.6
1569	275.1	52295.6
1570	275.2	56034.8
1571	275.3	54015.1
1572	275.4	45953
1573	275.5	32386.3
1574	275.6	17247.3
1575	275.7	6176.24
1576	275.8	1888.5
1577	275.9	2296.85
1578	276	4088.94
1579	276.1	5153.15
1580	276.2	5282.49
1581	276.3	4871.97
1582	276.4	4081.93
1583	276.5	2906.79
1584	276.6	1556.77
1585	276.7	519.8
1586	276.8	103.13
1587	276.9	99
1588	277	223.04
1589	277.1	318.03
1590	277.2	340.31
1591	277.3	300.76
1592	277.4	221.28
1593	277.5	132.33
1594	277.6	60.49
1595	277.7	1.77
1596	277.8	0
1597	278.2	0
1598	278.3	11.78
1599	278.4	10.46
1600	278.5	11.83
1601	278.6	28.36
1602	278.7	48.49
1603	278.8	58.71
1604	278.9	54.58
1605	279	42.73
1606	279.1	33.94
1607	279.2	28.99
1608	279.3	22.12
1609	279.4	12.73
1610	279.5	5.96
1611	279.6	8.93
1612	279.7	17.33
1613	279.8	23.86
1614	279.9	31.15
1615	280	37.67
1616	280.1	49.21
1617	280.2	0.85
1618	280.3	0
1619	280.5	0
1620	280.6	128.15
1621	280.7	334.74
1622	280.8	268.01
1623	280.9	70.97
1624	281	0
1625	281.3	0
1626	281.4	32.74
1627	281.5	187.7
1628	281.6	222.65
1629	281.7	118.35
1630	281.8	0
1631	281.9	0
1632	282	8.63
1633	282.1	0
1634	282.5	0
1635	282.6	74.99
1636	282.7	124.45
1637	282.8	113.7
1638	282.9	57.43
1639	283	0
1640	283.9	0
1641	284	32.52
1642	284.1	65.11
1643	284.2	55.3
1644	284.3	28.78
1645	284.4	7.61
1646	284.5	2.26
1647	284.6	6.14
1648	284.7	10.67
1649	284.8	9.45
1650	284.9	1.06
1651	285	0
1652	285.4	0
1653	285.5	2.26
1654	285.6	9.18
1655	285.7	17.76
1656	285.8	27.96
1657	285.9	37.32
1658	286	43.57
1659	286.1	47.45
1660	286.2	53.83
1661	286.3	58.05
1662	286.4	44.79
1663	286.5	0
1664	286.9	0
1665	287	4.84
1666	287.1	22.24
1667	287.2	18.47
1668	287.3	12.16
1669	287.4	11.11
1670	287.5	15.92
1671	287.6	26.09
1672	287.7	42.6
1673	287.8	60.47
1674	287.9	69.92
1675	288	64.71
1676	288.1	49.77
1677	288.2	35.86
1678	288.3	30.14
1679	288.4	32.66
1680	288.5	38.12
1681	288.6	39
1682	288.7	34.08
1683	288.8	35.21
1684	288.9	55.29
1685	289	86.08
1686	289.1	99.29
1687	289.2	71.13
1688	289.3	43.76
1689	289.4	163.37
1690	289.5	965.86
1691	289.6	2836.74
1692	289.7	5720.35
1693	289.8	9220.17
1694	289.9	12693.1
1695	290	15431.2
1696	290.1	17004.2
1697	290.2	17364.4
1698	290.3	16396.6
1699	290.4	13715.1
1700	290.5	9467.69
1701	290.6	5023.76
1702	290.7	2108.21
1703	290.8	1284.29
1704	290.9	1703.98
1705	291	2350.77
1706	291.1	2755.33
1707	291.2	2899.54
1708	291.3	2770.91
1709	291.4	2285.33
1710	291.5	1508.53
1711	291.6	741.35
1712	291.7	296.3
1713	291.8	187.23
1714	291.9	203.16
1715	292	234
1716	292.1	259.15
1717	292.2	264.59
1718	292.3	246.44
1719	292.4	203.5
1720	292.5	139.67
1721	292.6	81.24
1722	292.7	48.56
1723	292.8	40.32
1724	292.9	38.46
1725	293	22.03
1726	293.1	0
1727	293.4	0
1728	293.5	9.05
1729	293.6	9.74
1730	293.7	6.95
1731	293.8	3.64
1732	293.9	0.08
1733	294	0
1734	294.3	0
1735	294.4	0.76
1736	294.5	0
1737	295.2	0
1738	295.3	4.29
1739	295.4	16.4
1740	295.5	37.73
1741	295.6	78.33
1742	295.7	135.86
1743	295.8	197.16
1744	295.9	255.1
1745	296	299.9
1746	296.1	350.34
1747	296.2	453.46
1748	296.3	470.97
1749	296.4	165.37
1750	296.5	0
1751	296.8	0
1752	296.9	471.58
1753	297	890.95
1754	297.1	933.93
1755	297.2	590.8
1756	297.3	168.28
1757	297.4	40.15
1758	297.5	280.44
1759	297.6	472
1760	297.7	524.13
1761	297.8	195.64
1762	297.9	0
1763	298.5	0
1764	298.6	22.93
1765	298.7	0
1766	299.1	0
1767	299.2	84.99
1768	299.3	210.57
1769	299.4	146.31
1770	299.5	45.3
1771	299.6	0
1772	299.8	0
1773	299.9	135.83
1774	300	223.35
1775	300.1	178.45
1776	300.2	136.26
1777	300.3	167.69
1778	300.4	186.68
1779	300.5	104.51
1780	300.6	19.92
1781	300.7	0
1782	300.8	29.43
1783	300.9	70.43
1784	301	83.41
1785	301.1	85.04
1786	301.2	83.43
1787	301.3	71.37
1788	301.4	51.34
1789	301.5	31.33
1790	301.6	19.42
1791	301.7	8.56
1792	301.8	1.72
1793	301.9	4.39
1794	302	13.12
1795	302.1	19.7
1796	302.2	20.83
1797	302.3	16.27
1798	302.4	0.99
1799	302.5	0
1800	302.9	0
1801	303	5.33
1802	303.1	8.26
1803	303.2	7.18
1804	303.3	7.9
1805	303.4	8.1
1806	303.5	5.22
1807	303.6	1.34
1808	303.7	0
1809	304.4	0
1810	304.5	4.99
1811	304.6	8.55
1812	304.7	7.31
1813	304.8	0
1814	305.3	0
1815	305.4	1.5
1816	305.5	5.05
1817	305.6	3.3
1818	305.7	0
1819	306.2	0
1820	306.3	0.16
1821	306.4	7.83
1822	306.5	17.84
1823	306.6	27.76
1824	306.7	29.41
1825	306.8	18.68
1826	306.9	2.36
1827	307	0
1828	307.3	0
1829	307.4	1.66
1830	307.5	4.79
1831	307.6	9.68
1832	307.7	13.55
1833	307.8	11.08
1834	307.9	0.79
1835	308	0
1836	308.6	0
1837	308.7	12.51
1838	308.8	15.29
1839	308.9	12.87
1840	309	10.86
1841	309.1	10.53
1842	309.2	9.18
1843	309.3	5.46
1844	309.4	1.81
1845	309.5	1.63
1846	309.6	5
1847	309.7	8.46
1848	309.8	8.43
1849	309.9	4.29
1850	310	0
1851	310.2	0
1852	310.3	1.82
1853	310.4	4.18
1854	310.5	7.55
1855	310.6	14.11
1856	310.7	20.45
1857	310.8	19.82
1858	310.9	11.37
1859	311	1.46
1860	311.1	0
1861	312	0
1862	312.1	5.91
1863	312.2	16.1
1864	312.3	16.11
1865	312.4	11.91
1866	312.5	8.37
1867	312.6	6.24
1868	312.7	5.42
1869	312.8	5.54
1870	312.9	7.14
1871	313	8.57
1872	313.1	7.18
1873	313.2	3.71
1874	313.3	1.76
1875	313.4	2.53
1876	313.5	3.61
1877	313.6	3.02
1878	313.7	1.37
1879	313.8	0.32
1880	313.9	1.79
1881	314	4.92
1882	314.1	9.8
1883	314.2	13.51
1884	314.3	13.55
1885	314.4	10.3
1886	314.5	6.33
1887	314.6	1.49
1888	314.7	0
1889	315	0
1890	315.1	1.67
1891	315.2	5.52
1892	315.3	4.45
1893	315.4	5.12
1894	315.5	7.45
1895	315.6	4.12
1896	315.7	0
1897	315.9	0
1898	316	3.3
1899	316.1	24.29
1900	316.2	47.02
1901	316.3	67.84
1902	316.4	81.16
1903	316.5	84.85
1904	316.6	104.05
1905	316.7	149.95
1906	316.8	233.54
1907	316.9	378.82
1908	317	561.39
1909	317.1	666.65
1910	317.2	587.93
1911	317.3	518.58
1912	317.4	1413.89
1913	317.5	8638.35
1914	317.6	28680.8
1915	317.7	63608
1916	317.8	111299
1917	317.9	164822
1918	318	213172
1919	318.1	246352
1920	318.2	261047
1921	318.3	256925
1922	318.4	228913
1923	318.5	173278
1924	318.6	103000
1925	318.7	45729.3
1926	318.8	20747.5
1927	318.9	23897.5
1928	319	37346.6
1929	319.1	47623.1
1930	319.2	51564.7
1931	319.3	50466.4
1932	319.4	44350.8
1933	319.5	32812.6
1934	319.6	18606.7
1935	319.7	7193.83
1936	319.8	2108.17
1937	319.9	2217.56
1938	320	4297.28
1939	320.1	6116.8
1940	320.2	7042.76
1941	320.3	7023.1
1942	320.4	5997.58
1943	320.5	4141.5
1944	320.6	2077.62
1945	320.7	593.13
1946	320.8	73.02
1947	320.9	128.91
1948	321	390.19
1949	321.1	553.95
1950	321.2	566.76
1951	321.3	497.59
1952	321.4	384.41
1953	321.5	236.68
1954	321.6	98.06
1955	321.7	12.43
1956	321.8	0
1957	322.2	0
1958	322.3	12.42
1959	322.4	16.59
1960	322.5	10.83
1961	322.6	2.89
1962	322.7	1.22
1963	322.8	11.91
1964	322.9	25.99
1965	323	31.05
1966	323.1	24.73
1967	323.2	15.66
1968	323.3	10.92
1969	323.4	7.84
1970	323.5	2.94
1971	323.6	0
1972	323.9	0
1973	324	0.66
1974	324.1	1.94
1975	324.2	2.79
1976	324.3	4.5
1977	324.4	7.43
1978	324.5	9.6
1979	324.6	8.89
1980	324.7	6.63
1981	324.8	6.31
1982	324.9	8.54
1983	325	9.32
1984	325.1	6.16
1985	325.2	1.38
1986	325.3	0
1987	325.4	0.04
1988	325.5	0.57
1989	325.6	0
1990	325.8	0
1991	325.9	1.15
1992	326	1.84
1993	326.1	0.45
1994	326.2	0
1995	326.4	0
1996	326.5	1.86
1997	326.6	6.71
[truncated: 2,247 more rows]

## Sheet: Sheet8
+ESI Scan (rt: 9.88-10.10 min, 49 scans) Frag=100.0V CF=0.000 DF=0.000 4608-01.d Subtract
Index	X	Y
0	50	0
1	50.1	0.09
2	50.2	0.42
3	50.3	0.41
4	50.4	0
5	50.7	0
6	50.8	0.77
7	50.9	0.71
8	51	0
9	51.6	0
10	51.7	0.27
11	51.8	0.74
12	51.9	1.09
13	52	1.16
14	52.1	0.8
15	52.2	0.16
16	52.3	0
17	52.5	0
18	52.6	0
19	52.7	0
20	53	0
21	53.1	0.61
22	53.2	2.19
23	53.3	2.72
24	53.4	1.94
25	53.5	0.68
26	53.6	0
27	53.7	0.03
28	53.8	0.16
29	53.9	0
30	54.6	0
31	54.7	33.35
32	54.8	113.16
33	54.9	203.4
34	55	223.42
35	55.1	142.81
36	55.2	12.07
37	55.3	0
38	55.6	0
39	55.7	1.49
40	55.8	0.09
41	55.9	0
42	56.2	0
43	56.3	1.02
44	56.4	16.2
45	56.5	34.28
46	56.6	91.89
47	56.7	174.85
48	56.8	231.65
49	56.9	223.56
50	57	152.37
51	57.1	21.16
52	57.2	0
53	57.4	0
54	57.5	184.07
55	57.6	230.51
56	57.7	105.22
57	57.8	1.48
58	57.9	0
59	58	0
60	58.1	10.13
61	58.2	44.9
62	58.3	78.44
63	58.4	122.29
64	58.5	123.27
65	58.6	12.64
66	58.7	122.31
67	58.8	451.82
68	58.9	860.75
69	59	1099.08
70	59.1	1065.61
71	59.2	873.03
72	59.3	738.95
73	59.4	748.75
74	59.5	730.42
75	59.6	502.53
76	59.7	151.94
77	59.8	34.34
78	59.9	64.19
79	60	86.02
80	60.1	144.34
81	60.2	221.94
82	60.3	223.96
83	60.4	136.75
84	60.5	91.4
85	60.6	165.43
86	60.7	193.54
87	60.8	90.56
88	60.9	0
89	61.3	0
90	61.4	74.27
91	61.5	304.79
92	61.6	364.49
93	61.7	123.95
94	61.8	0
95	61.9	2.63
96	62	63.06
97	62.1	92.09
98	62.2	66.26
99	62.3	10.39
100	62.4	0
101	62.9	0
102	63	17.84
103	63.1	47.76
104	63.2	60.6
105	63.3	45.17
106	63.4	14.1
107	63.5	0
108	63.9	0
109	64	6.13
110	64.1	10.1
111	64.2	17.54
112	64.3	24.8
113	64.4	25.17
114	64.5	18.98
115	64.6	11
116	64.7	4.19
117	64.8	0
118	65	0
119	65.1	2.86
120	65.2	8.17
121	65.3	12.61
122	65.4	12.18
123	65.5	6.81
124	65.6	1.09
125	65.7	0
126	66.4	0
127	66.5	1.03
128	66.6	2.58
129	66.7	3.59
130	66.8	2.74
131	66.9	0.71
132	67	1.38
133	67.1	7.66
134	67.2	15.99
135	67.3	18.72
136	67.4	13.16
137	67.5	4.64
138	67.6	0
139	67.9	0
140	68	0.97
141	68.1	6.85
142	68.2	12.72
143	68.3	15.69
144	68.4	14.72
145	68.5	11.44
146	68.6	0
147	68.8	0
148	68.9	11.58
149	69	8.54
150	69.1	0
151	69.3	0
152	69.4	33.02
153	69.5	48.03
154	69.6	22.92
155	69.7	0
156	69.8	0
157	69.9	1.61
158	70	20.06
159	70.1	20.02
160	70.2	4.85
161	70.3	0
162	70.4	1.64
163	70.5	13.35
164	70.6	21.11
165	70.7	20.68
166	70.8	63.22
167	70.9	138.1
168	71	152.46
169	71.1	33.53
170	71.2	0
171	71.7	0
172	71.8	0.75
173	71.9	8.3
174	72	1.31
175	72.1	0
176	72.4	0
177	72.5	171.11
178	72.6	99.84
179	72.7	0
180	72.8	0
181	72.9	239.27
182	73	907.17
183	73.1	807.42
184	73.2	0
185	73.7	0
186	73.8	48.19
187	73.9	108.98
188	74	285.76
189	74.1	282.34
190	74.2	141.12
191	74.3	0
192	75.1	0
193	75.2	18.75
194	75.3	304.53
195	75.4	399.76
196	75.5	285.43
197	75.6	113.48
198	75.7	50.07
199	75.8	12.18
200	75.9	0
201	76.5	0
202	76.6	5.05
203	76.7	47.12
204	76.8	86.89
205	76.9	88.72
206	77	54.58
207	77.1	27.15
208	77.2	23.94
209	77.3	24.86
210	77.4	0
211	77.6	0
212	77.7	49.64
213	77.8	181.5
214	77.9	295.64
215	78	313.02
216	78.1	217.26
217	78.2	57.89
218	78.3	0
219	78.8	0
220	78.9	96.72
221	79	145.64
222	79.1	109.12
223	79.2	39.07
224	79.3	0
225	79.6	0
226	79.7	2.44
227	79.8	28.05
228	79.9	51.19
229	80	69.4
230	80.1	62.37
231	80.2	23.02
232	80.3	0
233	80.8	0
234	80.9	1.41
235	81	171.84
236	81.1	228.6
237	81.2	135.13
238	81.3	8.93
239	81.4	0
240	81.5	0
241	81.6	43.99
242	81.7	78.99
243	81.8	94.08
244	81.9	91.6
245	82	92.01
246	82.1	96.8
247	82.2	87.02
248	82.3	53.89
249	82.4	21.56
250	82.5	5.52
251	82.6	0
252	83	0
253	83.1	32.97
254	83.2	124.37
255	83.3	154.38
256	83.4	111.81
257	83.5	22.24
258	83.6	0
259	83.9	0
260	84	64.08
261	84.1	177.5
262	84.2	281.65
263	84.3	283.17
264	84.4	149.29
265	84.5	0
266	84.8	0
267	84.9	12.03
268	85	30.65
269	85.1	36.79
270	85.2	32.17
271	85.3	36.5
272	85.4	42.82
273	85.5	31.28
274	85.6	7.66
275	85.7	2.09
276	85.8	1.72
277	85.9	1.49
278	86	0
279	86.1	0
280	86.2	4.6
281	86.3	2.42
282	86.4	0
283	86.6	0
284	86.7	3.14
285	86.8	18.57
286	86.9	15.17
287	87	2.49
288	87.1	0
289	87.6	0
290	87.7	75.18
291	87.8	72.27
292	87.9	36.24
293	88	3.06
294	88.1	24.08
295	88.2	74.76
296	88.3	179.87
297	88.4	441.11
298	88.5	594.75
299	88.6	724.38
300	88.7	893.86
301	88.8	1097.81
302	88.9	1120.8
303	89	748.88
304	89.1	167.98
305	89.2	0
306	89.8	0
307	89.9	165.33
308	90	269.35
309	90.1	227.7
310	90.2	158.83
311	90.3	72.84
312	90.4	0
313	90.5	0
314	90.6	26.43
315	90.7	68.46
316	90.8	73.08
317	90.9	114.7
318	91	219.23
319	91.1	249.76
320	91.2	112.05
321	91.3	0
322	91.7	0
323	91.8	28.59
324	91.9	40.67
325	92	24.86
326	92.1	4.57
327	92.2	0
328	92.4	0
329	92.5	3.57
330	92.6	22.46
331	92.7	27.24
332	92.8	0
333	93.5	0
334	93.6	0.32
335	93.7	12.97
336	93.8	19.26
337	93.9	21.17
338	94	14.97
339	94.1	2.03
340	94.2	0
341	94.3	0
342	94.4	2.76
343	94.5	6.77
344	94.6	2.11
345	94.7	0
346	94.8	7.88
347	94.9	46.17
348	95	76.94
349	95.1	63.76
350	95.2	17.94
351	95.3	0
352	95.6	0
353	95.7	4.21
354	95.8	30.98
355	95.9	64.3
356	96	80.2
357	96.1	66.33
358	96.2	34.33
359	96.3	6.8
360	96.4	0.06
361	96.5	27.92
362	96.6	48.23
363	96.7	0
364	97.6	0
365	97.7	88.16
366	97.8	160.22
367	97.9	154.54
368	98	67.39
369	98.1	0
370	98.2	32.62
371	98.3	76.21
372	98.4	20.02
373	98.5	0
374	98.6	66.76
375	98.7	248.85
376	98.8	352.01
377	98.9	405.04
378	99	589.14
379	99.1	821.1
380	99.2	760.46
381	99.3	336.5
382	99.4	0
383	99.6	0
384	99.7	58.49
385	99.8	8.95
386	99.9	0
387	100.2	0
388	100.3	13.91
389	100.4	24.66
390	100.5	49.76
391	100.6	61.78
392	100.7	68.21
393	100.8	137.33
394	100.9	270.4
395	101	304.36
396	101.1	116.97
397	101.2	0
398	101.5	0
399	101.6	46.83
400	101.7	130.39
401	101.8	376.91
402	101.9	718.48
403	102	933.2
404	102.1	887.29
405	102.2	636.63
406	102.3	293.42
407	102.4	0
408	102.7	0
409	102.8	35.33
410	102.9	74.59
411	103	14.86
412	103.1	0
413	103.9	0
414	104	14.32
415	104.1	63.7
416	104.2	71.16
417	104.3	32.08
418	104.4	0
419	104.6	0
420	104.7	19.14
421	104.8	53.5
422	104.9	32.83
423	105	0
424	105.5	0
425	105.6	36.81
426	105.7	43.67
427	105.8	12.9
428	105.9	0
429	106.5	0
430	106.6	35.22
431	106.7	78.28
432	106.8	78.96
433	106.9	24.05
434	107	0
435	107.2	0
436	107.3	103.84
437	107.4	228.83
438	107.5	244.09
439	107.6	165.98
440	107.7	101.65
441	107.8	106.77
442	107.9	119.58
443	108	92.4
444	108.1	45.02
445	108.2	19.08
446	108.3	21.63
447	108.4	32.24
448	108.5	45.4
449	108.6	90.02
450	108.7	135.93
451	108.8	133.8
452	108.9	72.3
453	109	0
454	110.4	0
455	110.5	5.01
456	110.6	0
457	111.1	0
458	111.2	8.44
459	111.3	57.68
460	111.4	62.04
461	111.5	44.62
462	111.6	26.39
463	111.7	16.84
464	111.8	0
465	112.9	0
466	113	60.06
467	113.1	213.49
468	113.2	346.63
469	113.3	405.9
470	113.4	367.42
471	113.5	267.86
472	113.6	165.67
473	113.7	94.99
474	113.8	43.36
475	113.9	0
476	114.4	0
477	114.5	36.5
478	114.6	0.68
479	114.7	0
480	114.8	0
481	114.9	31.87
482	115	18.7
483	115.1	0
484	115.2	0
485	115.3	107.22
486	115.4	118.49
487	115.5	0
488	115.8	0
489	115.9	60.94
490	116	192.55
491	116.1	201.49
492	116.2	191.01
493	116.3	201.22
494	116.4	194.49
495	116.5	97.51
496	116.6	0
497	116.8	0
498	116.9	97.33
499	117	265.47
500	117.1	263.34
501	117.2	119.8
502	117.3	0
503	117.5	0
504	117.6	12.37
505	117.7	53.6
506	117.8	68.16
507	117.9	70.67
508	118	64.88
509	118.1	54.84
510	118.2	40.51
511	118.3	23.67
512	118.4	19.45
513	118.5	14.39
514	118.6	10.59
515	118.7	0
516	119.5	0
517	119.6	6.47
518	119.7	48.02
519	119.8	46.65
520	119.9	26.06
521	120	7
522	120.1	0
523	120.2	15.19
524	120.3	82.51
525	120.4	147.09
526	120.5	168.67
527	120.6	66.14
528	120.7	0
529	120.9	0
530	121	255.19
531	121.1	660.67
532	121.2	703.35
533	121.3	400.86
534	121.4	68.1
535	121.5	0
536	122.4	0
537	122.5	52.42
538	122.6	82.35
539	122.7	104.01
540	122.8	95.39
541	122.9	86.18
542	123	81.98
543	123.1	68.31
544	123.2	30.57
545	123.3	0
546	123.4	17.34
547	123.5	59.95
548	123.6	83.93
549	123.7	58.4
550	123.8	4.82
551	123.9	0
552	124	0
553	124.1	32.15
554	124.2	70.54
555	124.3	70.77
556	124.4	58.99
557	124.5	45.4
558	124.6	68.21
559	124.7	120.66
560	124.8	148.15
561	124.9	101.2
562	125	7.26
563	125.1	0
564	125.8	0
565	125.9	29.32
566	126	47.92
567	126.1	42.98
568	126.2	36.13
569	126.3	30.9
570	126.4	13.59
571	126.5	0
572	126.9	0
573	127	76.71
574	127.1	122.53
575	127.2	100.79
576	127.3	31.72
577	127.4	0
578	127.8	0
579	127.9	0.41
580	128	3.46
581	128.1	0
582	128.8	0
583	128.9	196.68
584	129	367.87
585	129.1	373.81
586	129.2	270.83
587	129.3	171.34
588	129.4	89.39
589	129.5	0
590	129.8	0
591	129.9	29.19
592	130	29.47
593	130.1	39.61
594	130.2	77.58
595	130.3	114.85
596	130.4	77.94
597	130.5	0
598	131.4	0
599	131.5	23.07
600	131.6	65.8
601	131.7	44.18
602	131.8	11.38
603	131.9	3.9
604	132	25.72
605	132.1	60.54
606	132.2	91.25
607	132.3	97.86
608	132.4	75.58
609	132.5	43.88
610	132.6	0.08
611	132.7	0
612	132.8	39.73
613	132.9	172.63
614	133	316.75
615	133.1	381.75
616	133.2	325.83
617	133.3	186.61
618	133.4	55.58
619	133.5	0
620	133.7	0
621	133.8	12.45
622	133.9	12.97
623	134	0
624	134.3	0
625	134.4	5.14
626	134.5	0
627	135.3	0
628	135.4	16.82
629	135.5	39.79
630	135.6	0
631	135.9	0
632	136	38.4
633	136.1	79.26
634	136.2	31.85
635	136.3	6.09
636	136.4	67.22
637	136.5	196.03
638	136.6	216.23
639	136.7	47.4
640	136.8	0
641	137.2	0
642	137.3	283.82
643	137.4	415.85
644	137.5	202.43
645	137.6	0
646	137.8	0
647	137.9	0.67
648	138	183.1
649	138.1	217.11
650	138.2	163.97
651	138.3	139.93
652	138.4	164.65
653	138.5	170.52
654	138.6	138.25
655	138.7	113.63
656	138.8	119.99
657	138.9	132.49
658	139	95.75
659	139.1	16.28
660	139.2	0
661	139.7	0
662	139.8	9.52
663	139.9	96.02
664	140	108.63
665	140.1	59.48
666	140.2	0
667	140.5	0
668	140.6	34.52
669	140.7	118
670	140.8	120.17
671	140.9	94.33
672	141	86.3
673	141.1	63.5
674	141.2	0
675	142.1	0
676	142.2	2.81
677	142.3	71.69
678	142.4	168.19
679	142.5	269.33
680	142.6	313.9
681	142.7	238.04
682	142.8	120.58
683	142.9	85.3
684	143	157.02
685	143.1	238.73
686	143.2	240.42
687	143.3	171.1
688	143.4	69.76
689	143.5	4.37
690	143.6	0
691	143.7	4.69
692	143.8	37.09
693	143.9	64.18
694	144	70.36
695	144.1	64.02
696	144.2	48.97
697	144.3	68.72
698	144.4	35.34
699	144.5	0
700	144.8	0
701	144.9	12.66
702	145	169.98
703	145.1	272.09
704	145.2	225.27
705	145.3	44.29
706	145.4	0
707	147	0
708	147.1	41.62
709	147.2	59.63
710	147.3	26.52
711	147.4	0
712	147.5	0
713	147.6	8.84
714	147.7	28.61
715	147.8	31.03
716	147.9	12.47
717	148	0
718	148.3	0
719	148.4	53.86
720	148.5	51.17
721	148.6	0
722	148.8	0
723	148.9	12.97
724	149	40.31
725	149.1	13.2
726	149.2	0
727	149.9	0
728	150	29.04
729	150.1	43.15
730	150.2	37.79
731	150.3	39.48
732	150.4	66.13
733	150.5	104.4
734	150.6	105.29
735	150.7	68.55
736	150.8	36.9
737	150.9	24.31
738	151	5.79
739	151.1	0
740	151.5	0
741	151.6	12.34
742	151.7	13.92
743	151.8	0
744	152	0
745	152.1	7.06
746	152.2	53.6
747	152.3	61.01
748	152.4	0
749	153.4	0
750	153.5	195.67
751	153.6	234.75
752	153.7	113.4
753	153.8	0
754	154.5	0
755	154.6	55.3
756	154.7	150.71
757	154.8	160.85
758	154.9	64.7
759	155	0
760	155.3	0
761	155.4	47.85
762	155.5	80.67
763	155.6	106.21
764	155.7	98.49
765	155.8	61.39
766	155.9	9.84
767	156	0
768	156.6	0
769	156.7	62.47
770	156.8	122.29
771	156.9	133.91
772	157	117
773	157.1	117.08
774	157.2	128.36
775	157.3	108.98
776	157.4	56.67
777	157.5	24.94
778	157.6	9.92
779	157.7	3.59
780	157.8	0
781	158.2	0
782	158.3	13.34
783	158.4	16.41
784	158.5	0
785	158.7	0
786	158.8	1.27
787	158.9	61.26
788	159	102.94
789	159.1	103.59
790	159.2	67.64
791	159.3	21.2
792	159.4	0
793	159.6	0
794	159.7	0.41
795	159.8	1.37
796	159.9	0
797	160.5	0
798	160.6	13.83
799	160.7	90.26
800	160.8	44.39
801	160.9	0
802	161	0
803	161.1	18.71
804	161.2	36.61
805	161.3	0
806	162.6	0
807	162.7	35.83
808	162.8	34.18
809	162.9	0
810	163.5	0
811	163.6	6.21
812	163.7	5.77
813	163.8	0
814	166.6	0
815	166.7	5.59
816	166.8	16.25
817	166.9	12.85
818	167	12.2
819	167.1	24.1
820	167.2	34.27
821	167.3	32.19
822	167.4	24.66
823	167.5	19.57
824	167.6	19.46
825	167.7	23.35
826	167.8	23.53
827	167.9	11.84
828	168	0
829	168.6	0
830	168.7	20.22
831	168.8	50.26
832	168.9	70.82
833	169	89.98
834	169.1	104.7
835	169.2	92.9
836	169.3	49.03
837	169.4	3.51
838	169.5	0
839	169.6	17.6
840	169.7	37.89
841	169.8	21.15
842	169.9	0
843	170.4	0
844	170.5	1.12
845	170.6	5.02
846	170.7	0
847	171.3	0
848	171.4	45.17
849	171.5	241.57
850	171.6	463.91
851	171.7	625.3
852	171.8	666.95
853	171.9	624.57
854	172	591.69
855	172.1	608.29
856	172.2	620.16
857	172.3	531.8
858	172.4	341.64
859	172.5	158.61
860	172.6	76.92
861	172.7	80.17
862	172.8	81.68
863	172.9	53.65
864	173	45.71
865	173.1	68.51
866	173.2	85.73
867	173.3	74.55
868	173.4	47.14
869	173.5	27.6
870	173.6	11.25
871	173.7	0
872	174.4	0
873	174.5	19.76
874	174.6	42.92
875	174.7	23.64
876	174.8	0
877	174.9	4.06
878	175	50.9
879	175.1	83.28
880	175.2	69.47
881	175.3	37.03
882	175.4	9.19
883	175.5	0
884	175.6	13.23
885	175.7	36.34
886	175.8	33.62
887	175.9	0
888	177.7	0
889	177.8	36.31
890	177.9	63.55
891	178	60.33
892	178.1	29.2
893	178.2	0
894	178.4	0
895	178.5	10.84
896	178.6	0
897	179	0
898	179.1	120.72
899	179.2	167.59
900	179.3	118.92
901	179.4	34.95
902	179.5	0
903	179.6	0
904	179.7	4.82
905	179.8	35.71
906	179.9	46.31
907	180	37.02
908	180.1	25.95
909	180.2	23
910	180.3	17.47
911	180.4	5.01
912	180.5	0
913	180.7	0
914	180.8	49.65
915	180.9	87.79
916	181	72.62
917	181.1	21.14
918	181.2	0
919	181.4	0
920	181.5	5.84
921	181.6	2.95
922	181.7	0
923	183.1	0
924	183.2	41.68
925	183.3	58.48
926	183.4	17.03
927	183.5	0
928	183.8	0
929	183.9	39.74
930	184	62.33
931	184.1	47.08
932	184.2	17.85
933	184.3	2.7
934	184.4	6.79
935	184.5	7.22
936	184.6	0
937	185.2	0
938	185.3	27.05
939	185.4	46.37
940	185.5	35.87
941	185.6	15.56
942	185.7	0
943	185.9	0
944	186	17.46
945	186.1	62.17
946	186.2	90.51
947	186.3	74.43
948	186.4	30.76
949	186.5	0
950	186.8	0
951	186.9	3.03
952	187	24.97
953	187.1	47.71
954	187.2	55.21
955	187.3	42.5
956	187.4	21.44
957	187.5	4.67
958	187.6	0
959	187.8	0
960	187.9	11.59
961	188	35.61
962	188.1	52.88
963	188.2	48.71
964	188.3	22.79
965	188.4	0
966	188.8	0
967	188.9	34.16
968	189	53.76
969	189.1	49.41
970	189.2	35.8
971	189.3	20.75
972	189.4	6.35
973	189.5	0
974	189.6	4.88
975	189.7	17.11
976	189.8	15.07
977	189.9	0
978	190.6	0
979	190.7	39.31
980	190.8	229.13
981	190.9	395.85
982	191	382.41
983	191.1	191.05
984	191.2	4.12
985	191.3	0
986	191.4	0
987	191.5	14.78
988	191.6	23.34
989	191.7	31.48
990	191.8	23.77
991	191.9	0
992	192.2	0
993	192.3	12.88
994	192.4	12.64
995	192.5	0
996	193.1	0
997	193.2	56.85
998	193.3	112.36
999	193.4	97.99
1000	193.5	39.81
1001	193.6	15.05
1002	193.7	34.01
1003	193.8	31.31
1004	193.9	0
1005	194.2	0
1006	194.3	2.92
1007	194.4	104.59
1008	194.5	190.99
1009	194.6	242.57
1010	194.7	251.36
1011	194.8	227.66
1012	194.9	174.92
1013	195	94.99
1014	195.1	12.56
1015	195.2	0
1016	195.4	0
1017	195.5	24.5
1018	195.6	40.49
1019	195.7	61.33
1020	195.8	77.54
1021	195.9	68.84
1022	196	44.71
1023	196.1	28
1024	196.2	25.6
1025	196.3	19.52
1026	196.4	0
1027	197.4	0
1028	197.5	7.15
1029	197.6	0
1030	198.9	0
1031	199	22.03
1032	199.1	38.58
1033	199.2	29.41
1034	199.3	13.86
1035	199.4	8.83
1036	199.5	7.87
1037	199.6	1.89
1038	199.7	0
1039	200	0
1040	200.1	3.79
1041	200.2	21.09
1042	200.3	0.49
1043	200.4	0
1044	200.6	0
1045	200.7	29.4
1046	200.8	117.58
1047	200.9	141.14
1048	201	77.5
1049	201.1	0
1050	201.4	0
1051	201.5	5.52
1052	201.6	0
1053	202.2	0
1054	202.3	12.63
1055	202.4	27.06
1056	202.5	42.52
1057	202.6	57.33
1058	202.7	61.66
1059	202.8	48.08
1060	202.9	24.38
1061	203	9.6
1062	203.1	10.44
1063	203.2	16.61
1064	203.3	17.14
1065	203.4	12.88
1066	203.5	11.8
1067	203.6	16.73
1068	203.7	29.95
1069	203.8	48.09
1070	203.9	56.7
1071	204	44.58
1072	204.1	18.75
1073	204.2	1.73
1074	204.3	9.1
1075	204.4	35.12
1076	204.5	64.94
1077	204.6	93.44
1078	204.7	105.91
1079	204.8	52.43
1080	204.9	0
1081	205.1	0
1082	205.2	6.05
1083	205.3	16.84
1084	205.4	0
1085	205.5	0
1086	205.6	11.22
1087	205.7	22.63
1088	205.8	0
1089	206.1	0
1090	206.2	7.61
1091	206.3	16.1
1092	206.4	0
1093	206.6	0
1094	206.7	6.42
1095	206.8	122.93
1096	206.9	255.99
1097	207	332.75
1098	207.1	313.62
1099	207.2	217.63
1100	207.3	114.16
1101	207.4	50.35
1102	207.5	31.73
1103	207.6	0
1104	208	0
1105	208.1	5.1
1106	208.2	0
1107	208.6	0
1108	208.7	41.49
1109	208.8	94.83
1110	208.9	113.24
1111	209	102.95
1112	209.1	75.48
1113	209.2	39.09
1114	209.3	9.16
1115	209.4	3.54
1116	209.5	10.48
1117	209.6	17.43
1118	209.7	8.05
1119	209.8	0
1120	210	0
1121	210.1	14.9
1122	210.2	29.15
1123	210.3	29.54
1124	210.4	25.76
1125	210.5	27.15
1126	210.6	19.9
1127	210.7	3.85
1128	210.8	0
1129	210.9	13.6
1130	211	28.53
1131	211.1	14.64
1132	211.2	0
1133	211.4	0
1134	211.5	55.63
1135	211.6	134.4
1136	211.7	210.63
1137	211.8	266.94
1138	211.9	297.35
1139	212	307.01
1140	212.1	299.91
1141	212.2	271.27
1142	212.3	217.68
1143	212.4	150.65
1144	212.5	95.15
1145	212.6	71.5
1146	212.7	80.06
1147	212.8	102.75
1148	212.9	118.68
1149	213	116.56
1150	213.1	106.39
1151	213.2	101.65
1152	213.3	103.88
1153	213.4	94.05
1154	213.5	71.81
1155	213.6	59
1156	213.7	78.79
1157	213.8	125.78
1158	213.9	168.12
1159	214	163.12
1160	214.1	116.51
1161	214.2	81.99
1162	214.3	83.71
1163	214.4	97.51
1164	214.5	97.22
1165	214.6	79.1
1166	214.7	54.83
1167	214.8	42.69
1168	214.9	51.64
1169	215	79.64
1170	215.1	102.82
1171	215.2	93.92
1172	215.3	64.23
1173	215.4	32.32
1174	215.5	16.78
1175	215.6	17.43
1176	215.7	16.81
1177	215.8	1.22
1178	215.9	0
1179	216.2	0
1180	216.3	19.51
1181	216.4	36.17
1182	216.5	42.1
1183	216.6	32.04
1184	216.7	8.89
1185	216.8	0
1186	216.9	0
1187	217	6.94
1188	217.1	22.72
1189	217.2	14.95
1190	217.3	0
1191	218.6	0
1192	218.7	19.97
1193	218.8	78.9
1194	218.9	79.76
1195	219	56.25
1196	219.1	58.17
1197	219.2	88.3
1198	219.3	116.05
1199	219.4	114.16
1200	219.5	89.18
1201	219.6	59.15
1202	219.7	30.72
1203	219.8	9.33
1204	219.9	0
1205	220.4	0
1206	220.5	27.69
1207	220.6	182.11
1208	220.7	334.15
1209	220.8	374.93
1210	220.9	298.12
1211	221	182.83
1212	221.1	109.36
1213	221.2	77.27
1214	221.3	54.1
1215	221.4	24.4
1216	221.5	2.99
1217	221.6	8.32
1218	221.7	43.18
1219	221.8	72.8
1220	221.9	72.44
1221	222	36.34
1222	222.1	0
1223	222.2	0
1224	222.3	47.2
1225	222.4	29.7
1226	222.5	0
1227	222.8	0
1228	222.9	459.34
1229	223	567.39
1230	223.1	374.89
1231	223.2	260.7
1232	223.3	359.85
1233	223.4	488.65
1234	223.5	489.83
1235	223.6	377.48
1236	223.7	255.77
1237	223.8	193.5
1238	223.9	155.68
1239	224	156.97
1240	224.1	212.42
1241	224.2	277.18
1242	224.3	284.28
1243	224.4	229.42
1244	224.5	210.21
1245	224.6	240.08
1246	224.7	239.63
1247	224.8	154.38
1248	224.9	77.05
1249	225	95.64
1250	225.1	177.19
1251	225.2	211.07
1252	225.3	165.45
1253	225.4	89.23
1254	225.5	40
1255	225.6	0
1256	227.2	0
1257	227.3	5.45
1258	227.4	20.37
1259	227.5	12.27
1260	227.6	0
1261	228.9	0
1262	229	7.23
1263	229.1	35.4
1264	229.2	40.13
1265	229.3	25.45
1266	229.4	8.85
1267	229.5	8.73
1268	229.6	21.72
1269	229.7	21.37
1270	229.8	3.34
1271	229.9	0
1272	230.1	0
1273	230.2	1.7
1274	230.3	15.75
1275	230.4	31.44
1276	230.5	30.23
1277	230.6	8.87
1278	230.7	0
1279	230.9	0
1280	231	36.14
1281	231.1	104.83
1282	231.2	117.14
1283	231.3	75.88
1284	231.4	17.86
1285	231.5	0
1286	231.7	0
1287	231.8	3.15
1288	231.9	12.68
1289	232	18.95
1290	232.1	23.33
1291	232.2	20.38
1292	232.3	3.59
1293	232.4	0
1294	232.8	0
1295	232.9	18.15
1296	233	54.63
1297	233.1	53.29
1298	233.2	21.57
1299	233.3	0
1300	234.2	0
1301	234.3	14.18
1302	234.4	47.65
1303	234.5	74.98
1304	234.6	70.98
1305	234.7	20.01
1306	234.8	0
1307	235.2	0
1308	235.3	23.99
1309	235.4	42.11
1310	235.5	32.34
1311	235.6	4.58
1312	235.7	0
1313	236.6	0
1314	236.7	51.89
1315	236.8	96
1316	236.9	84.11
1317	237	46.22
1318	237.1	30.63
1319	237.2	43.25
1320	237.3	50.78
1321	237.4	37.32
1322	237.5	22.48
1323	237.6	19.49
1324	237.7	18.76
1325	237.8	10.47
1326	237.9	0
1327	238	2.51
1328	238.1	19.66
1329	238.2	40.68
1330	238.3	52.82
1331	238.4	49.73
1332	238.5	31.39
1333	238.6	5.79
1334	238.7	0
1335	238.9	0
1336	239	10.3
1337	239.1	33.39
1338	239.2	37.36
1339	239.3	15.5
1340	239.4	0
1341	239.6	0
1342	239.7	0.22
1343	239.8	18.19
1344	239.9	27.02
1345	240	16.41
1346	240.1	0
1347	240.3	0
1348	240.4	5.83
1349	240.5	32.61
1350	240.6	40.87
1351	240.7	37.03
1352	240.8	41.08
1353	240.9	60.96
1354	241	76.7
1355	241.1	69.49
1356	241.2	40.55
1357	241.3	13.99
1358	241.4	0.68
1359	241.5	0
1360	241.9	0
1361	242	6.58
1362	242.1	23.41
1363	242.2	13.81
1364	242.3	0
1365	242.6	0
1366	242.7	3.71
1367	242.8	7.09
1368	242.9	7.3
1369	243	11.29
1370	243.1	21.95
1371	243.2	30.18
1372	243.3	23.57
1373	243.4	4.94
1374	243.5	0
1375	243.7	0
1376	243.8	15.05
1377	243.9	35.39
1378	244	55.92
1379	244.1	68.91
1380	244.2	64.7
1381	244.3	41.24
1382	244.4	11.88
1383	244.5	0
1384	244.8	0
1385	244.9	6.95
1386	245	21.08
1387	245.1	12.49
1388	245.2	0
1389	245.6	0
1390	245.7	1.63
1391	245.8	11.06
1392	245.9	24.4
1393	246	30.97
1394	246.1	24.08
1395	246.2	10.2
1396	246.3	2.7
1397	246.4	8.34
1398	246.5	18.27
1399	246.6	23.77
1400	246.7	24.66
1401	246.8	29.92
1402	246.9	43.28
1403	247	50.98
1404	247.1	41.11
1405	247.2	20.26
1406	247.3	4.98
1407	247.4	0
1408	247.8	0
1409	247.9	0.94
1410	248	8.18
1411	248.1	0
1412	248.7	0
1413	248.8	31.39
1414	248.9	53.67
1415	249	49.3
1416	249.1	23.91
1417	249.2	0
1418	249.9	0
1419	250	0.14
1420	250.1	0
1421	250.4	0
1422	250.5	2.37
1423	250.6	7.08
1424	250.7	27.2
1425	250.8	66.2
1426	250.9	102.29
1427	251	104.24
1428	251.1	68.5
1429	251.2	24.3
1430	251.3	0.23
1431	251.4	0
1432	251.5	1.65
1433	251.6	0.6
1434	251.7	0
1435	252.4	0
1436	252.5	9.76
1437	252.6	0
1438	253.3	0
1439	253.4	1.36
1440	253.5	2.36
1441	253.6	5.47
1442	253.7	13.3
1443	253.8	24.3
1444	253.9	30.81
1445	254	27
1446	254.1	14.14
1447	254.2	0.16
1448	254.3	0
1449	254.5	0
1450	254.6	1.14
1451	254.7	3.49
1452	254.8	0
1453	255.2	0
1454	255.3	5.51
1455	255.4	310.78
1456	255.5	1312.62
1457	255.6	2934.88
1458	255.7	4777.6
1459	255.8	6844.89
1460	255.9	9421.58
1461	256	12237.6
1462	256.1	14395.6
1463	256.2	15225.2
1464	256.3	14545.4
1465	256.4	12225.1
1466	256.5	8475.36
1467	256.6	4494.07
1468	256.7	1886.14
1469	256.8	1224.08
1470	256.9	1710.66
1471	257	2369.63
1472	257.1	2690.5
1473	257.2	2699.01
1474	257.3	2469.21
1475	257.4	1955.49
1476	257.5	1200.86
1477	257.6	477.28
1478	257.7	106.3
1479	257.8	52.9
1480	257.9	150.44
1481	258	291.98
1482	258.1	357.73
1483	258.2	351.81
1484	258.3	313.52
1485	258.4	254.17
1486	258.5	161.1
1487	258.6	62.36
1488	258.7	6.32
1489	258.8	4.8
1490	258.9	22.34
1491	259	28.75
1492	259.1	15.67
1493	259.2	2.36
1494	259.3	6.78
1495	259.4	21.74
1496	259.5	31.7
1497	259.6	26.75
1498	259.7	14.58
1499	259.8	6.04
1500	259.9	6.26
1501	260	13.99
1502	260.1	22.06
1503	260.2	21.19
1504	260.3	9.15
1505	260.4	0
1506	260.9	0
1507	261	0.61
1508	261.1	17.86
1509	261.2	11.33
1510	261.3	1.55
1511	261.4	8.09
1512	261.5	25.29
1513	261.6	34.61
1514	261.7	27.92
1515	261.8	7.61
1516	261.9	0
1517	262.1	0
1518	262.2	10.38
1519	262.3	38.64
1520	262.4	43.82
1521	262.5	8.92
1522	262.6	0
1523	263.1	0
1524	263.2	12.29
1525	263.3	26.77
1526	263.4	21.12
1527	263.5	0
1528	263.8	0
1529	263.9	8.65
1530	264	19.03
1531	264.1	8.64
1532	264.2	0
1533	265.2	0
1534	265.3	0.05
1535	265.4	3.05
1536	265.5	3.12
1537	265.6	4.84
1538	265.7	7.04
1539	265.8	7.1
1540	265.9	5.69
1541	266	4.14
1542	266.1	2.42
1543	266.2	0.73
1544	266.3	0.11
1545	266.4	0.6
1546	266.5	0
1547	267.1	0
1548	267.2	0.27
1549	267.3	1.99
1550	267.4	5.1
1551	267.5	12.09
1552	267.6	21.31
1553	267.7	24.26
1554	267.8	12.17
1555	267.9	0
1556	268.5	0
1557	268.6	10.75
1558	268.7	23.65
1559	268.8	23.16
1560	268.9	8.04
1561	269	0
1562	269.4	0
1563	269.5	0.12
1564	269.6	0
1565	270.2	0
1566	270.3	10.19
1567	270.4	18.43
1568	270.5	11.77
1569	270.6	0
1570	270.9	0
1571	271	3.13
1572	271.1	11.71
1573	271.2	4.24
1574	271.3	1.32
1575	271.4	23.55
1576	271.5	77.6
1577	271.6	136.57
1578	271.7	173.05
1579	271.8	193.78
1580	271.9	235.04
1581	272	290.32
1582	272.1	312.53
1583	272.2	278.28
1584	272.3	204.41
1585	272.4	121.56
1586	272.5	55.29
1587	272.6	28.45
1588	272.7	49.88
1589	272.8	94.29
1590	272.9	121.98
1591	273	125.37
1592	273.1	105.43
1593	273.2	72.37
1594	273.3	36.3
1595	273.4	2.73
1596	273.5	0
1597	273.6	54.16
1598	273.7	196.86
1599	273.8	397.18
1600	273.9	570.51
1601	274	614.94
1602	274.1	523.17
1603	274.2	408.03
1604	274.3	364.93
1605	274.4	349.52
1606	274.5	269.04
1607	274.6	135.99
1608	274.7	49.15
1609	274.8	40.67
1610	274.9	64.76
1611	275	93.04
1612	275.1	106.09
1613	275.2	99.84
1614	275.3	63.63
1615	275.4	21.21
1616	275.5	3.24
1617	275.6	7.88
1618	275.7	0
1619	276.2	0
1620	276.3	7.53
1621	276.4	10.68
1622	276.5	6.63
1623	276.6	0
1624	277.5	0
1625	277.6	2.61
1626	277.7	0
1627	278	0
1628	278.1	3.34
1629	278.2	0
1630	278.4	0
1631	278.5	12.23
1632	278.6	20.39
1633	278.7	23.96
1634	278.8	30.5
1635	278.9	37.8
1636	279	22.86
1637	279.1	0
1638	280.4	0
1639	280.5	84.15
1640	280.6	147.78
1641	280.7	134.5
1642	280.8	22.61
1643	280.9	0
1644	281.6	0
1645	281.7	42.39
1646	281.8	122.03
1647	281.9	140.24
1648	282	91.61
1649	282.1	11.62
1650	282.2	0
1651	283.2	0
1652	283.3	5.1
1653	283.4	29.78
1654	283.5	23.48
1655	283.6	6.59
1656	283.7	0
1657	284	0
1658	284.1	6.48
1659	284.2	11.02
1660	284.3	11.31
1661	284.4	13.1
1662	284.5	17.04
1663	284.6	18.31
1664	284.7	13.23
1665	284.8	8.11
1666	284.9	15.14
1667	285	32.34
1668	285.1	45.2
1669	285.2	37.27
1670	285.3	16.55
1671	285.4	1.48
1672	285.5	2.87
1673	285.6	10.73
1674	285.7	14.77
1675	285.8	11.81
1676	285.9	8.91
1677	286	11.27
1678	286.1	16.5
1679	286.2	18.42
1680	286.3	16.58
1681	286.4	13.23
1682	286.5	10.84
1683	286.6	9.14
1684	286.7	6.22
1685	286.8	1.96
1686	286.9	0
1687	287	0
1688	287.1	1.93
1689	287.2	8.32
1690	287.3	13.77
1691	287.4	15.01
1692	287.5	22.98
1693	287.6	110.69
1694	287.7	304.08
1695	287.8	512.71
1696	287.9	631.18
1697	288	675.49
1698	288.1	729.32
1699	288.2	768.47
1700	288.3	674.51
1701	288.4	425.92
1702	288.5	164.86
1703	288.6	37.58
1704	288.7	24.69
1705	288.8	64.71
1706	288.9	113.27
1707	289	139.25
1708	289.1	131.34
1709	289.2	97.71
1710	289.3	61.59
1711	289.4	46.65
1712	289.5	51.22
1713	289.6	77.99
1714	289.7	103
1715	289.8	100.41
1716	289.9	81.36
1717	290	65.71
1718	290.1	52.99
1719	290.2	32.45
1720	290.3	15.99
1721	290.4	30.78
1722	290.5	63.91
1723	290.6	81.32
1724	290.7	76.53
1725	290.8	59.13
1726	290.9	42.51
1727	291	37.31
1728	291.1	50.16
1729	291.2	60.17
1730	291.3	25.32
1731	291.4	0
1732	295.5	0
1733	295.6	10.64
1734	295.7	8.14
1735	295.8	0
1736	296.5	0
1737	296.6	56.08
1738	296.7	220.09
1739	296.8	265.85
1740	296.9	73.97
1741	297	0
1742	297.4	0
1743	297.5	33.43
1744	297.6	77.11
1745	297.7	0
1746	298.1	0
1747	298.2	58.9
1748	298.3	29.83
1749	298.4	37.19
1750	298.5	154.33
1751	298.6	260.98
1752	298.7	218.27
1753	298.8	0
1754	299.2	0
1755	299.3	81.15
1756	299.4	134.54
1757	299.5	15.7
1758	299.6	0
1759	299.8	0
1760	299.9	2.61
1761	300	0
1762	300.2	0
1763	300.3	9.25
1764	300.4	18.07
1765	300.5	18.63
1766	300.6	16.01
1767	300.7	24.15
1768	300.8	32.23
1769	300.9	27.5
1770	301	8.14
1771	301.1	0
1772	301.3	0
1773	301.4	12.51
1774	301.5	38.19
1775	301.6	55.91
1776	301.7	75.37
1777	301.8	122.3
1778	301.9	202.57
1779	302	284.37
1780	302.1	329.05
1781	302.2	323.98
1782	302.3	275.91
1783	302.4	195.14
1784	302.5	104.26
1785	302.6	43.23
1786	302.7	20.02
1787	302.8	21.73
1788	302.9	27.85
1789	303	20.84
1790	303.1	12.52
1791	303.2	10.51
1792	303.3	10.97
1793	303.4	7.74
1794	303.5	1.84
1795	303.6	0
1796	303.7	0
1797	303.8	3.29
1798	303.9	16.04
1799	304	31.59
1800	304.1	47.88
1801	304.2	56.73
1802	304.3	54.03
1803	304.4	39.45
1804	304.5	18.44
1805	304.6	0
1806	305	0
1807	305.1	1.54
1808	305.2	0.15
1809	305.3	0
1810	306.1	0
1811	306.2	3.14
1812	306.3	15.4
1813	306.4	16.01
1814	306.5	11.98
1815	306.6	15.43
1816	306.7	22.12
1817	306.8	18.71
1818	306.9	3.02
1819	307	0
1820	307.1	0
1821	307.2	4.2
1822	307.3	7.28
1823	307.4	3.44
1824	307.5	0
1825	308.2	0
1826	308.3	1.92
1827	308.4	12.02
1828	308.5	21.92
1829	308.6	25.32
1830	308.7	24.42
1831	308.8	22.66
1832	308.9	17.39
1833	309	4.95
1834	309.1	0
1835	309.3	0
1836	309.4	1.07
1837	309.5	1.27
1838	309.6	0.99
1839	309.7	3.38
1840	309.8	7.67
1841	309.9	10.45
1842	310	9.58
1843	310.1	6.97
1844	310.2	6.5
1845	310.3	8.39
1846	310.4	7.27
1847	310.5	0
1848	312	0
1849	312.1	7.8
1850	312.2	4.63
1851	312.3	0
1852	312.6	0
1853	312.7	3
1854	312.8	13.76
1855	312.9	19.32
1856	313	11.85
1857	313.1	0
1858	313.6	0
1859	313.7	0.23
1860	313.8	5.7
1861	313.9	12.93
1862	314	15.27
1863	314.1	8.93
1864	314.2	0
1865	314.4	0
1866	314.5	11.82
1867	314.6	28.07
1868	314.7	32.64
1869	314.8	25.2
1870	314.9	14.78
1871	315	9.56
1872	315.1	7.45
1873	315.2	12.13
1874	315.3	55.92
1875	315.4	158.82
1876	315.5	316.38
1877	315.6	527.83
1878	315.7	832.94
1879	315.8	1318.54
1880	315.9	1979.04
1881	316	2608.84
1882	316.1	2956
1883	316.2	2963.53
1884	316.3	2746.72
1885	316.4	2356.43
1886	316.5	1729.31
1887	316.6	959.12
1888	316.7	362.2
1889	316.8	174.02
1890	316.9	261.91
1891	317	432.18
1892	317.1	521.89
1893	317.2	501.39
1894	317.3	427.21
1895	317.4	337.12
1896	317.5	253.01
1897	317.6	213.76
1898	317.7	271.26
1899	317.8	400.23
1900	317.9	493.6
1901	318	463.51
1902	318.1	377.66
1903	318.2	346.34
1904	318.3	347.52
1905	318.4	290.37
1906	318.5	152.27
1907	318.6	38.37
1908	318.7	0
1909	318.8	0
1910	318.9	0.25
1911	319	30.77
1912	319.1	52.64
1913	319.2	48.55
1914	319.3	28.4
1915	319.4	14.94
1916	319.5	11.35
1917	319.6	15.5
1918	319.7	16.63
1919	319.8	11.45
1920	319.9	3.52
1921	320	0
1922	320.2	0
1923	320.3	0.74
1924	320.4	1.55
1925	320.5	1.74
1926	320.6	1.44
1927	320.7	0
1928	321.2	0
1929	321.3	7.25
1930	321.4	15.32
1931	321.5	15.39
1932	321.6	8.15
1933	321.7	0
1934	322.1	0
1935	322.2	2.31
1936	322.3	5.59
1937	322.4	7.64
1938	322.5	7.62
1939	322.6	4.27
1940	322.7	0
1941	323.4	0
1942	323.5	0.46
1943	323.6	1.9
1944	323.7	0.71
1945	323.8	0
1946	324.7	0
1947	324.8	4.29
1948	324.9	9.74
1949	325	9.56
1950	325.1	6.22
1951	325.2	2.43
1952	325.3	0
1953	325.5	0
1954	325.6	2.04
1955	325.7	4.43
1956	325.8	3.98
1957	325.9	1.89
1958	326	0
1959	328.5	0
1960	328.6	3.06
1961	328.7	7.17
1962	328.8	10.91
1963	328.9	5.73
1964	329	0
1965	330.4	0
1966	330.5	6.37
1967	330.6	11.85
1968	330.7	13.32
1969	330.8	11.67
1970	330.9	9.22
1971	331	6.54
1972	331.1	0
1973	331.5	0
1974	331.6	31.97
1975	331.7	86.1
1976	331.8	148.74
1977	331.9	208.68
1978	332	241.75
1979	332.1	247.54
1980	332.2	247.56
1981	332.3	246.2
1982	332.4	214.61
1983	332.5	133.58
1984	332.6	32.69
1985	332.7	0
1986	335.1	0
1987	335.2	2.6
1988	335.3	1.48
1989	335.4	0
1990	337.2	0
1991	337.3	1.38
1992	337.4	11.14
1993	337.5	2.74
1994	337.6	0
1995	339.8	0
1996	339.9	3.25
1997	340	3.6
[truncated: 1,747 more rows]

## Sheet: Sheet9
+ESI Scan (rt: 10.51-10.73 min, 48 scans) Frag=100.0V CF=0.000 DF=0.000 4608-01.d Subtract
Index	X	Y
0	50	0
1	50.1	0.62
2	50.2	1.08
3	50.3	0.79
4	50.4	0
5	51.3	0
6	51.4	0.09
7	51.5	0.16
8	51.6	0.19
9	51.7	0
10	52.3	0
11	52.4	0.03
12	52.5	0.12
13	52.6	0.34
14	52.7	0.5
15	52.8	0.31
16	52.9	0
17	53.2	0
18	53.3	0.29
19	53.4	0.62
20	53.5	0.73
21	53.6	0.95
22	53.7	1.17
23	53.8	0.97
24	53.9	0.17
25	54	0
26	54.6	0
27	54.7	17.87
28	54.8	32.31
29	54.9	1.69
30	55	0
31	56.9	0
32	57	44.05
33	57.1	32.52
34	57.2	0
35	58.8	0
36	58.9	153.07
37	59	306.5
38	59.1	292.47
39	59.2	29.97
40	59.3	0
41	59.7	0
42	59.8	71.27
43	59.9	61.23
44	60	168.91
45	60.1	245.26
46	60.2	208.2
47	60.3	52.4
48	60.4	0
49	61.6	0
50	61.7	38.76
51	61.8	30.05
52	61.9	76.66
53	62	72.49
54	62.1	60.8
55	62.2	63.55
56	62.3	56.88
57	62.4	33.7
58	62.5	14.08
59	62.6	9.67
60	62.7	2.28
61	62.8	0
62	62.9	0
63	63	6.79
64	63.1	18.2
65	63.2	19.42
66	63.3	11.83
67	63.4	4.34
68	63.5	1.04
69	63.6	0
70	64.1	0
71	64.2	3.89
72	64.3	39.05
73	64.4	52.57
74	64.5	36.43
75	64.6	9.64
76	64.7	0
77	64.9	0
78	65	4.56
79	65.1	10.58
80	65.2	13.2
81	65.3	10.04
82	65.4	3.97
83	65.5	0
84	65.9	0
85	66	0.01
86	66.1	0.55
87	66.2	1.19
88	66.3	1.5
89	66.4	1.36
90	66.5	1.23
91	66.6	1.67
92	66.7	2.49
93	66.8	2.89
94	66.9	2.37
95	67	1.55
96	67.1	1.11
97	67.2	0.76
98	67.3	0
99	67.6	0
100	67.7	0.1
101	67.8	0.79
102	67.9	0.98
103	68	0.75
104	68.1	1
105	68.2	2.07
106	68.3	1.5
107	68.4	0
108	68.5	0
109	68.6	10.9
110	68.7	53.22
111	68.8	86.87
112	68.9	74.17
113	69	32.01
114	69.1	6.47
115	69.2	16.2
116	69.3	36.97
117	69.4	47.94
118	69.5	57.01
119	69.6	72.48
120	69.7	73.5
121	69.8	63.84
122	69.9	52.97
123	70	59.75
124	70.1	89.92
125	70.2	110.96
126	70.3	95.72
127	70.4	44.59
128	70.5	8.57
129	70.6	6.15
130	70.7	34.05
131	70.8	57.56
132	70.9	62.26
133	71	46.25
134	71.1	0
135	71.4	0
136	71.5	19.83
137	71.6	73.96
138	71.7	41.39
139	71.8	0
140	72.1	0
141	72.2	30.04
142	72.3	75.47
143	72.4	101.66
144	72.5	186.69
145	72.6	109.4
146	72.7	0
147	73	0
148	73.1	497.11
149	73.2	968.56
150	73.3	817.22
151	73.4	420.98
152	73.5	273.73
153	73.6	350.49
154	73.7	351.03
155	73.8	15.44
156	73.9	0
157	74.3	0
158	74.4	121.85
159	74.5	288.57
160	74.6	214.69
161	74.7	76.82
162	74.8	38.61
163	74.9	66
164	75	49.13
165	75.1	0
166	75.2	0
167	75.3	11.4
168	75.4	38.61
169	75.5	2.77
170	75.6	0
171	75.7	0
172	75.8	15.51
173	75.9	29.45
174	76	10.95
175	76.1	0
176	76.3	0
177	76.4	6.66
178	76.5	27.41
179	76.6	8.57
180	76.7	0
181	77.7	0
182	77.8	84.09
183	77.9	130.46
184	78	60.3
185	78.1	0
186	78.9	0
187	79	2.49
188	79.1	40.21
189	79.2	57.29
190	79.3	38.58
191	79.4	4.04
192	79.5	0
193	79.6	0.45
194	79.7	15.03
195	79.8	27.93
196	79.9	35.88
197	80	35.36
198	80.1	20.43
199	80.2	1.87
200	80.3	0
201	80.4	9.83
202	80.5	39.15
203	80.6	45.73
204	80.7	28.87
205	80.8	26.45
206	80.9	59.05
207	81	67.09
208	81.1	0
209	81.4	0
210	81.5	49.74
211	81.6	93.87
212	81.7	47.07
213	81.8	0
214	81.9	0
215	82	3.09
216	82.1	10.2
217	82.2	0
218	82.5	0
219	82.6	10.3
220	82.7	60.81
221	82.8	82.73
222	82.9	46.84
223	83	0
224	83.2	0
225	83.3	43.56
226	83.4	108.2
227	83.5	107.61
228	83.6	47.4
229	83.7	0
230	85.1	0
231	85.2	62.35
232	85.3	105.64
233	85.4	98.31
234	85.5	56.31
235	85.6	8.19
236	85.7	0
237	85.9	0
238	86	16.15
239	86.1	27.96
240	86.2	33.37
241	86.3	35.34
242	86.4	32.79
243	86.5	30.1
244	86.6	20.05
245	86.7	55.28
246	86.8	126.32
247	86.9	153.97
248	87	89.48
249	87.1	0
250	87.6	0
251	87.7	7.17
252	87.8	37.39
253	87.9	32.46
254	88	0
255	88.4	0
256	88.5	198.32
257	88.6	412.16
258	88.7	485.61
259	88.8	363.43
260	88.9	63.34
261	89	0
262	89.9	0
263	90	164.81
264	90.1	220.28
265	90.2	214.11
266	90.3	151.1
267	90.4	79.38
268	90.5	46.22
269	90.6	34.62
270	90.7	47.07
271	90.8	50.39
272	90.9	42.29
273	91	60.04
274	91.1	118.29
275	91.2	191.41
276	91.3	201.49
277	91.4	113.26
278	91.5	0
279	91.7	0
280	91.8	0.85
281	91.9	2.27
282	92	0
283	92.1	0
284	92.2	3.04
285	92.3	22.09
286	92.4	24.19
287	92.5	6.84
288	92.6	0
289	93	0
290	93.1	27.73
291	93.2	87.52
292	93.3	74.48
293	93.4	24.36
294	93.5	0
295	93.7	0
296	93.8	1.31
297	93.9	7.13
298	94	5.73
299	94.1	0.08
300	94.2	0
301	94.5	0
302	94.6	10.27
303	94.7	35.8
304	94.8	58.35
305	94.9	62.43
306	95	50.34
307	95.1	30.5
308	95.2	2.03
309	95.3	0
310	97.6	0
311	97.7	24.59
312	97.8	28.4
313	97.9	0
314	98	3.22
315	98.1	67.31
316	98.2	106.62
317	98.3	33.17
318	98.4	0
319	98.5	0
320	98.6	199.43
321	98.7	384.61
322	98.8	117.89
323	98.9	0
324	99.6	0
325	99.7	2.62
326	99.8	49.87
327	99.9	32.27
328	100	29.67
329	100.1	85.23
330	100.2	143.03
331	100.3	143.08
332	100.4	131.46
333	100.5	201.22
334	100.6	247.54
335	100.7	147.75
336	100.8	0
337	101.3	0
338	101.4	91.74
339	101.5	74.3
340	101.6	71.06
341	101.7	128.12
342	101.8	152.06
343	101.9	122.99
344	102	74.59
345	102.1	0
346	102.6	0
347	102.7	12.05
348	102.8	0
349	103.3	0
350	103.4	28.56
351	103.5	23.56
352	103.6	0
353	103.7	0
354	103.8	21.72
355	103.9	70.3
356	104	109.63
357	104.1	114.54
358	104.2	83.95
359	104.3	50.43
360	104.4	42.85
361	104.5	60.06
362	104.6	115.33
363	104.7	167.11
364	104.8	138.92
365	104.9	14.38
366	105	0
367	105.3	0
368	105.4	33.85
369	105.5	38.67
370	105.6	19.04
371	105.7	0
372	106.3	0
373	106.4	51.32
374	106.5	172.35
375	106.6	232.67
376	106.7	135.68
377	106.8	0
378	107.3	0
379	107.4	47.88
380	107.5	199.92
381	107.6	142.54
382	107.7	62.88
383	107.8	20.79
384	107.9	0.39
385	108	0
386	109.5	0
387	109.6	5.54
388	109.7	19.03
389	109.8	0.76
390	109.9	0
391	110.2	0
392	110.3	6.47
393	110.4	5.65
394	110.5	0
395	111.6	0
396	111.7	21.33
397	111.8	9.46
398	111.9	0
399	113	0
400	113.1	47.63
401	113.2	25.04
402	113.3	0
403	113.6	0
404	113.7	119.24
405	113.8	216.87
406	113.9	184.69
407	114	21.83
408	114.1	0
409	114.4	0
410	114.5	7.04
411	114.6	13.44
412	114.7	0
413	115.7	0
414	115.8	19.97
415	115.9	174.26
416	116	211.54
417	116.1	186.14
418	116.2	135.78
419	116.3	66.65
420	116.4	0
421	116.7	0
422	116.8	14.3
423	116.9	75.42
424	117	53.85
425	117.1	0
426	117.3	0
427	117.4	8.73
428	117.5	25.59
429	117.6	10.99
430	117.7	11.88
431	117.8	4.7
432	117.9	0
433	118	0
434	118.1	12.19
435	118.2	26.24
436	118.3	21.59
437	118.4	0
438	118.8	0
439	118.9	168.27
440	119	231.4
441	119.1	116.15
442	119.2	0
443	119.9	0
444	120	0.06
445	120.1	40.96
446	120.2	71.63
447	120.3	121.94
448	120.4	154.89
449	120.5	151.38
450	120.6	146.07
451	120.7	188.95
452	120.8	276.05
453	120.9	347.8
454	121	348.16
455	121.1	279.1
456	121.2	190.02
457	121.3	131.45
458	121.4	121.25
459	121.5	145.54
460	121.6	166.46
461	121.7	189.41
462	121.8	179.94
463	121.9	77.44
464	122	0
465	122.4	0
466	122.5	15.55
467	122.6	62.64
468	122.7	59.6
469	122.8	0
470	123.5	0
471	123.6	23.79
472	123.7	100.39
473	123.8	162.46
474	123.9	147.31
475	124	71.93
476	124.1	17.95
477	124.2	27.32
478	124.3	55.93
479	124.4	48.76
480	124.5	14.49
481	124.6	0
482	124.7	17.51
483	124.8	72.44
484	124.9	145.45
485	125	196.67
486	125.1	184.7
487	125.2	120.08
488	125.3	54.81
489	125.4	29.85
490	125.5	28.67
491	125.6	7.78
492	125.7	0
493	126.3	0
494	126.4	32.8
495	126.5	97.05
496	126.6	113.81
497	126.7	63.57
498	126.8	9.24
499	126.9	17.56
500	127	70.85
501	127.1	93.38
502	127.2	59.06
503	127.3	12.96
504	127.4	1.89
505	127.5	16.13
506	127.6	23.18
507	127.7	0
508	128.4	0
509	128.5	34.42
510	128.6	71.08
511	128.7	53.59
512	128.8	34.32
513	128.9	57.75
514	129	81.19
515	129.1	32.97
516	129.2	0
517	129.3	0
518	129.4	21.84
519	129.5	82.12
520	129.6	68.83
521	129.7	12.86
522	129.8	0
523	130.1	0
524	130.2	9.03
525	130.3	54.49
526	130.4	26.99
527	130.5	0
528	130.8	0
529	130.9	43.37
530	131	103.87
531	131.1	0
532	131.4	0
533	131.5	56.6
534	131.6	96.32
535	131.7	95.98
536	131.8	91.73
537	131.9	81.21
538	132	72.01
539	132.1	35.52
540	132.2	0
541	132.5	0
542	132.6	10.02
543	132.7	118.64
544	132.8	170.74
545	132.9	126.57
546	133	31.49
547	133.1	0
548	133.2	0
549	133.3	34.35
550	133.4	102.23
551	133.5	135.67
552	133.6	127.01
553	133.7	57.25
554	133.8	0
555	134.2	0
556	134.3	13.31
557	134.4	55.67
558	134.5	62.3
559	134.6	45.15
560	134.7	2.37
561	134.8	0
562	135.8	0
563	135.9	46.07
564	136	76.11
565	136.1	89.49
566	136.2	77.97
567	136.3	78.51
568	136.4	101.39
569	136.5	133.82
570	136.6	98.67
571	136.7	0
572	137	0
573	137.1	14.44
574	137.2	302.46
575	137.3	574.6
576	137.4	576.63
577	137.5	271.03
578	137.6	0
579	137.8	0
580	137.9	25.96
581	138	4.65
582	138.1	0
583	138.6	0
584	138.7	43.54
585	138.8	177.92
586	138.9	239
587	139	132.13
588	139.1	0
589	139.8	0
590	139.9	48.23
591	140	84.52
592	140.1	96.52
593	140.2	66.66
594	140.3	0
595	140.5	0
596	140.6	1.59
597	140.7	28.8
598	140.8	40.52
599	140.9	41.14
600	141	25.28
601	141.1	0
602	141.9	0
603	142	26.97
604	142.1	64.1
605	142.2	49.33
606	142.3	44.57
607	142.4	51.39
608	142.5	48.11
609	142.6	19.95
610	142.7	0
611	143.1	0
612	143.2	12.2
613	143.3	113.43
614	143.4	133.32
615	143.5	66.8
616	143.6	15.47
617	143.7	41.92
618	143.8	107.21
619	143.9	143.17
620	144	130.35
621	144.1	93.85
622	144.2	61.51
623	144.3	38.86
624	144.4	15.99
625	144.5	0
626	145.3	0
627	145.4	71
628	145.5	105.24
629	145.6	49.22
630	145.7	0
631	146.1	0
632	146.2	2.28
633	146.3	63.57
634	146.4	54.66
635	146.5	0
636	147.3	0
637	147.4	32.47
638	147.5	30.17
639	147.6	6.33
640	147.7	0
641	148.4	0
642	148.5	9.71
643	148.6	13.57
644	148.7	37.95
645	148.8	98.15
646	148.9	127.52
647	149	70.72
648	149.1	0
649	149.2	0
650	149.3	50.3
651	149.4	77
652	149.5	14.46
653	149.6	0
654	149.9	0
655	150	24.41
656	150.1	61.99
657	150.2	45.5
658	150.3	25.74
659	150.4	40.57
660	150.5	62.68
661	150.6	7.77
662	150.7	0
663	151	0
664	151.1	7.73
665	151.2	52.42
666	151.3	54.56
667	151.4	3.73
668	151.5	0
669	151.8	0
670	151.9	0.47
671	152	0
672	152.2	0
673	152.3	8.66
674	152.4	36.04
675	152.5	15.22
676	152.6	0
677	153.4	0
678	153.5	163.38
679	153.6	134.55
680	153.7	0
681	154.2	0
682	154.3	48.23
683	154.4	56.07
684	154.5	24.83
685	154.6	9.5
686	154.7	30.21
687	154.8	78.59
688	154.9	81.19
689	155	29.9
690	155.1	0
691	155.2	12.47
692	155.3	75.11
693	155.4	102.51
694	155.5	63.24
695	155.6	0
696	155.7	0
697	155.8	9.17
698	155.9	73.67
699	156	96.84
700	156.1	61.43
701	156.2	0
702	157.1	0
703	157.2	68.74
704	157.3	96.76
705	157.4	34.02
706	157.5	0
707	157.9	0
708	158	4.42
709	158.1	27.44
710	158.2	36.03
711	158.3	23.1
712	158.4	0
713	158.6	0
714	158.7	4.22
715	158.8	108.87
716	158.9	193.23
717	159	204.3
718	159.1	141.34
719	159.2	51.41
720	159.3	0
721	159.5	0
722	159.6	27.94
723	159.7	18.12
724	159.8	0
725	160.8	0
726	160.9	17.42
727	161	93.04
728	161.1	137.9
729	161.2	131.05
730	161.3	115.13
731	161.4	107.11
732	161.5	112.23
733	161.6	84.31
734	161.7	59.6
735	161.8	51.45
736	161.9	46.1
737	162	43.9
738	162.1	42.57
739	162.2	35.45
740	162.3	12.05
741	162.4	0
742	162.6	0
743	162.7	12.3
744	162.8	0
745	163.1	0
746	163.2	50.37
747	163.3	76.06
748	163.4	67.19
749	163.5	49.19
750	163.6	27.81
751	163.7	12.14
752	163.8	0
753	164.1	0
754	164.2	7.6
755	164.3	0
756	164.5	0
757	164.6	22.19
758	164.7	46.55
759	164.8	54.68
760	164.9	62.54
761	165	79.72
762	165.1	92.52
763	165.2	79.4
764	165.3	41.55
765	165.4	6.33
766	165.5	0
767	165.6	2.95
768	165.7	22.45
769	165.8	31.7
770	165.9	24.19
771	166	9.61
772	166.1	0
773	166.8	0
774	166.9	23.9
775	167	54.51
776	167.1	52.8
777	167.2	31.93
778	167.3	13.63
779	167.4	4.45
780	167.5	7.42
781	167.6	9.41
782	167.7	8.82
783	167.8	6.81
784	167.9	3.46
785	168	1.5
786	168.1	4.59
787	168.2	11.55
788	168.3	15.07
789	168.4	8.03
790	168.5	0
791	168.9	0
792	169	6.71
793	169.1	73.4
794	169.2	106.7
795	169.3	92.82
796	169.4	55.92
797	169.5	35.74
798	169.6	41.38
799	169.7	48.54
800	169.8	33.67
801	169.9	0
802	170.3	0
803	170.4	77.74
804	170.5	134.19
805	170.6	126.35
806	170.7	79.05
807	170.8	43.18
808	170.9	42.74
809	171	75.69
810	171.1	120.1
811	171.2	155.06
812	171.3	164.66
813	171.4	131.06
814	171.5	74.69
815	171.6	17.58
816	171.7	0
817	172.6	0
818	172.7	15.51
819	172.8	49.81
820	172.9	40.44
821	173	4.89
822	173.1	0
823	173.3	0
824	173.4	11.4
825	173.5	46.54
826	173.6	70.91
827	173.7	65.32
828	173.8	37.74
829	173.9	11.52
830	174	0.01
831	174.1	0
832	174.2	0
833	174.3	9.16
834	174.4	33.99
835	174.5	24.62
836	174.6	0
837	175	0
838	175.1	27.19
839	175.2	20.13
840	175.3	0
841	176.7	0
842	176.8	8.83
843	176.9	5.28
844	177	0
845	178.1	0
846	178.2	18.03
847	178.3	34.35
848	178.4	41.03
849	178.5	7.88
850	178.6	0
851	179.7	0
852	179.8	2.1
853	179.9	17.01
854	180	37.59
855	180.1	48.04
856	180.2	38.38
857	180.3	18.03
858	180.4	0
859	180.8	0
860	180.9	31.04
861	181	20.22
862	181.1	0
863	181.6	0
864	181.7	11.49
865	181.8	14.06
866	181.9	6.08
867	182	3.43
868	182.1	16.4
869	182.2	33.87
870	182.3	48.73
871	182.4	61.7
872	182.5	60.89
873	182.6	40.69
874	182.7	13.21
875	182.8	3.8
876	182.9	24.54
877	183	46.16
878	183.1	38.69
879	183.2	2.89
880	183.3	0
881	183.7	0
882	183.8	11.82
883	183.9	0.76
884	184	0
885	185.8	0
886	185.9	11.36
887	186	14.03
888	186.1	0
889	186.3	0
890	186.4	11.7
891	186.5	40.56
892	186.6	3.94
893	186.7	0
894	187.8	0
895	187.9	2.03
896	188	1.11
897	188.1	0
898	188.9	0
899	189	5.3
900	189.1	0
901	189.2	0
902	189.3	1.2
903	189.4	19.15
904	189.5	18.29
905	189.6	11.83
906	189.7	5.04
907	189.8	0
908	190.9	0
909	191	2.5
910	191.1	0
911	191.5	0
912	191.6	30.8
913	191.7	67.55
914	191.8	63.35
915	191.9	12.05
916	192	0
917	192.4	0
918	192.5	4.9
919	192.6	20.78
920	192.7	35.5
921	192.8	24.34
922	192.9	0
923	193.8	0
924	193.9	39.49
925	194	51.26
926	194.1	24.19
927	194.2	0
928	194.5	0
929	194.6	10
930	194.7	61.58
931	194.8	197.48
932	194.9	361.04
933	195	418.26
934	195.1	320.07
935	195.2	169.5
936	195.3	83.67
937	195.4	75.13
938	195.5	55.87
939	195.6	27.02
940	195.7	0
941	196.1	0
942	196.2	1.45
943	196.3	8.79
944	196.4	15.65
945	196.5	0
946	196.8	0
947	196.9	63.73
948	197	96.43
949	197.1	34.71
950	197.2	0
951	197.7	0
952	197.8	6.85
953	197.9	40.03
954	198	35.4
955	198.1	0
956	199.1	0
957	199.2	5.63
958	199.3	24.51
959	199.4	29.74
960	199.5	33.09
961	199.6	44.66
962	199.7	54.06
963	199.8	32.41
964	199.9	0
965	200.7	0
966	200.8	31.46
967	200.9	22.32
968	201	0
969	201.4	0
970	201.5	1.79
971	201.6	42.4
972	201.7	45.48
973	201.8	10.13
974	201.9	0
975	202.2	0
976	202.3	10.92
977	202.4	7.88
978	202.5	2.21
979	202.6	0
980	202.8	0
981	202.9	2.99
982	203	25.93
983	203.1	32.78
984	203.2	29.39
985	203.3	31.72
986	203.4	32.25
987	203.5	16.06
988	203.6	0
989	204.8	0
990	204.9	15.92
991	205	48.4
992	205.1	57.77
993	205.2	15.72
994	205.3	0
995	206	0
996	206.1	18.58
997	206.2	38.76
998	206.3	40.68
999	206.4	0
1000	206.9	0
1001	207	3.06
1002	207.1	5.81
1003	207.2	39.55
1004	207.3	74.24
1005	207.4	58.85
1006	207.5	0
1007	207.9	0
1008	208	15.73
1009	208.1	25.99
1010	208.2	16.42
1011	208.3	0
1012	211.2	0
1013	211.3	26.9
1014	211.4	28.54
1015	211.5	6.03
1016	211.6	0
1017	212.5	0
1018	212.6	22.68
1019	212.7	46.06
1020	212.8	69.87
1021	212.9	89.38
1022	213	70.71
1023	213.1	20.01
1024	213.2	0
1025	214.4	0
1026	214.5	4.93
1027	214.6	0
1028	215.1	0
1029	215.2	6.2
1030	215.3	20.59
1031	215.4	18.5
1032	215.5	6
1033	215.6	0
1034	216.5	0
1035	216.6	8.24
1036	216.7	14.99
1037	216.8	8.04
1038	216.9	0
1039	217	0
1040	217.1	11.6
1041	217.2	20.29
1042	217.3	12.58
1043	217.4	0
1044	217.7	0
1045	217.8	29.76
1046	217.9	25.99
1047	218	0
1048	218.5	0
1049	218.6	34.22
1050	218.7	79.53
1051	218.8	54.23
1052	218.9	0
1053	219.2	0
1054	219.3	74.4
1055	219.4	77.25
1056	219.5	42.42
1057	219.6	20.11
1058	219.7	12.59
1059	219.8	1.38
1060	219.9	0
1061	220.3	0
1062	220.4	5.44
1063	220.5	48.36
1064	220.6	106.97
1065	220.7	129.01
1066	220.8	87.76
1067	220.9	7.35
1068	221	0
1069	222	0
1070	222.1	38.28
1071	222.2	68.32
1072	222.3	0
1073	223.7	0
1074	223.8	23.95
1075	223.9	180.41
1076	224	241.17
1077	224.1	173.03
1078	224.2	30.7
1079	224.3	0
1080	224.4	0
1081	224.5	200.24
1082	224.6	488.52
1083	224.7	619.29
1084	224.8	502.2
1085	224.9	226.94
1086	225	0
1087	225.2	0
1088	225.3	45.89
1089	225.4	103.59
1090	225.5	101.31
1091	225.6	44.98
1092	225.7	0
1093	225.9	0
1094	226	25.3
1095	226.1	67.03
1096	226.2	78.51
1097	226.3	59.55
1098	226.4	42.88
1099	226.5	39.5
1100	226.6	18.56
1101	226.7	0
1102	227.4	0
1103	227.5	21.65
1104	227.6	25.27
1105	227.7	15.06
1106	227.8	21.71
1107	227.9	39.63
1108	228	37.73
1109	228.1	1.19
1110	228.2	0
1111	228.6	0
1112	228.7	1.78
1113	228.8	19.56
1114	228.9	31.39
1115	229	33.82
1116	229.1	31.41
1117	229.2	32.5
1118	229.3	33.05
1119	229.4	30.51
1120	229.5	33.81
1121	229.6	47.15
1122	229.7	58.56
1123	229.8	52.81
1124	229.9	33.3
1125	230	16.66
1126	230.1	16.4
1127	230.2	28.64
1128	230.3	40.28
1129	230.4	39.66
1130	230.5	20.98
1131	230.6	0
1132	231.5	0
1133	231.6	3.4
1134	231.7	3.24
1135	231.8	7.15
1136	231.9	21.49
1137	232	39.93
1138	232.1	48.7
1139	232.2	39.83
1140	232.3	15.94
1141	232.4	0
1142	232.7	0
1143	232.8	0.42
1144	232.9	15.95
1145	233	18.97
1146	233.1	18.12
1147	233.2	19.48
1148	233.3	21.69
1149	233.4	18.12
1150	233.5	11.57
1151	233.6	5.19
1152	233.7	0
1153	234.2	0
1154	234.3	8.99
1155	234.4	9.66
1156	234.5	13.38
1157	234.6	18.88
1158	234.7	23.5
1159	234.8	24.67
1160	234.9	19.32
1161	235	0
1162	235.1	0
1163	235.2	15.71
1164	235.3	77.74
1165	235.4	106.45
1166	235.5	83.51
1167	235.6	36.26
1168	235.7	0
1169	236	0
1170	236.1	13.03
1171	236.2	1.82
1172	236.3	0
1173	237.6	0
1174	237.7	6.01
1175	237.8	9.06
1176	237.9	12.24
1177	238	10.44
1178	238.1	3.52
1179	238.2	0
1180	238.3	1.97
1181	238.4	4.1
1182	238.5	4.01
1183	238.6	8.2
1184	238.7	15.49
1185	238.8	15.9
1186	238.9	7.92
1187	239	0.69
1188	239.1	1.96
1189	239.2	7.02
1190	239.3	7.59
1191	239.4	3.6
1192	239.5	0
1193	240.5	0
1194	240.6	0.16
1195	240.7	13.9
1196	240.8	39.32
1197	240.9	62.87
1198	241	58.16
1199	241.1	29.86
1200	241.2	8.08
1201	241.3	11.45
1202	241.4	28.49
1203	241.5	38.37
1204	241.6	35.56
1205	241.7	23.2
1206	241.8	10.21
1207	241.9	3.44
1208	242	3.04
1209	242.1	3.92
1210	242.2	3.79
1211	242.3	5.41
1212	242.4	8.94
1213	242.5	10.19
1214	242.6	6.71
1215	242.7	0
1216	244.1	0
1217	244.2	0.25
1218	244.3	0
1219	245	0
1220	245.1	6.55
1221	245.2	8.32
1222	245.3	0
1223	245.6	0
1224	245.7	2.12
1225	245.8	3
1226	245.9	3.61
1227	246	3.84
1228	246.1	5.31
1229	246.2	8.56
1230	246.3	11.16
1231	246.4	11.65
1232	246.5	12.28
1233	246.6	13.72
1234	246.7	18.01
1235	246.8	22.85
1236	246.9	35.92
1237	247	51.31
1238	247.1	54.67
1239	247.2	36.66
1240	247.3	5.51
1241	247.4	0
1242	247.7	0
1243	247.8	2.29
1244	247.9	12.81
1245	248	6.38
1246	248.1	0
1247	248.6	0
1248	248.7	1.82
1249	248.8	10.68
1250	248.9	9.53
1251	249	0.88
1252	249.1	0.45
1253	249.2	9.86
1254	249.3	17.18
1255	249.4	12.2
1256	249.5	0
1257	249.9	0
1258	250	7.09
1259	250.1	32.36
1260	250.2	42.69
1261	250.3	33.48
1262	250.4	14.06
1263	250.5	4.81
1264	250.6	17.26
1265	250.7	31.64
1266	250.8	39.23
1267	250.9	42.92
1268	251	47.04
1269	251.1	44.17
1270	251.2	28.74
1271	251.3	7.49
1272	251.4	0
1273	251.5	5.71
1274	251.6	21.59
1275	251.7	25.02
1276	251.8	7.15
1277	251.9	0
1278	253.3	0
1279	253.4	4.88
1280	253.5	12.98
1281	253.6	11.03
1282	253.7	5.45
1283	253.8	0
1284	254.3	0
1285	254.4	14.11
1286	254.5	36.62
1287	254.6	40.65
1288	254.7	21.17
1289	254.8	0
1290	256.8	0
1291	256.9	10.76
1292	257	29.31
1293	257.1	39.25
1294	257.2	38.99
1295	257.3	30.13
1296	257.4	18.37
1297	257.5	13.64
1298	257.6	18.35
1299	257.7	28.46
1300	257.8	42.29
1301	257.9	61.14
1302	258	101.78
1303	258.1	150.25
1304	258.2	174.56
1305	258.3	149.4
1306	258.4	85.97
1307	258.5	25.15
1308	258.6	0
1309	258.8	0
1310	258.9	13.73
1311	259	26.74
1312	259.1	42.16
1313	259.2	54.25
1314	259.3	51.26
1315	259.4	31.54
1316	259.5	8.71
1317	259.6	0
1318	259.9	0
1319	260	0.73
1320	260.1	4.46
1321	260.2	8.63
1322	260.3	9.48
1323	260.4	3.75
1324	260.5	0
1325	260.8	0
1326	260.9	18.9
1327	261	49.79
1328	261.1	56.24
1329	261.2	34.45
1330	261.3	6.14
1331	261.4	0
1332	261.5	2.84
1333	261.6	18.81
1334	261.7	35.8
1335	261.8	42.21
1336	261.9	40.53
1337	262	40.59
1338	262.1	37.65
1339	262.2	20.85
1340	262.3	0
1341	262.5	0
1342	262.6	25.26
1343	262.7	39.12
1344	262.8	16.92
1345	262.9	0
1346	263.2	0
1347	263.3	3.25
1348	263.4	4.2
1349	263.5	2.72
1350	263.6	3.34
1351	263.7	5.74
1352	263.8	5.75
1353	263.9	4.36
1354	264	4.37
1355	264.1	6.5
1356	264.2	9.15
1357	264.3	9.1
1358	264.4	3.29
1359	264.5	0
1360	265.2	0
1361	265.3	11.5
1362	265.4	19.75
1363	265.5	15.11
1364	265.6	6.74
1365	265.7	9.75
1366	265.8	31.1
1367	265.9	51.8
1368	266	47.59
1369	266.1	20.81
1370	266.2	0
1371	266.9	0
1372	267	3.86
1373	267.1	0
1374	267.3	0
1375	267.4	3.78
1376	267.5	20.68
1377	267.6	28.61
1378	267.7	14.64
1379	267.8	0
1380	269.3	0
1381	269.4	18.51
1382	269.5	32.36
1383	269.6	28.19
1384	269.7	11.68
1385	269.8	0
1386	271.9	0
1387	272	3.88
1388	272.1	0
1389	272.6	0
1390	272.7	1.12
1391	272.8	33.87
1392	272.9	46.84
1393	273	36.07
1394	273.1	18.18
1395	273.2	3.95
1396	273.3	0
1397	274.7	0
1398	274.8	5.09
1399	274.9	38.94
1400	275	49.37
1401	275.1	34.62
1402	275.2	4.07
1403	275.3	0
1404	275.5	0
1405	275.6	1.43
1406	275.7	14.6
1407	275.8	22.29
1408	275.9	20.57
1409	276	10.2
1410	276.1	0
1411	276.5	0
1412	276.6	11.57
1413	276.7	5.98
1414	276.8	0
1415	277.5	0
1416	277.6	10.36
1417	277.7	3.22
1418	277.8	0
1419	278.5	0
1420	278.6	17.18
1421	278.7	43.08
1422	278.8	53.27
1423	278.9	44.98
1424	279	22.29
1425	279.1	0
1426	282.1	0
1427	282.2	39.11
1428	282.3	53.47
1429	282.4	48.05
1430	282.5	32.96
1431	282.6	0
1432	282.9	0
1433	283	28.93
1434	283.1	52.48
1435	283.2	46.81
1436	283.3	29.79
1437	283.4	17.49
1438	283.5	15.42
1439	283.6	20.7
1440	283.7	28.38
1441	283.8	28.84
1442	283.9	24.27
1443	284	20.41
1444	284.1	22.4
1445	284.2	28.16
1446	284.3	29.91
1447	284.4	21.02
1448	284.5	2.15
1449	284.6	0
1450	285.3	0
1451	285.4	16.22
1452	285.5	110.17
1453	285.6	322.18
1454	285.7	629
1455	285.8	1032.14
1456	285.9	1533.97
1457	286	2044.41
1458	286.1	2353.72
1459	286.2	2333.71
1460	286.3	2035.27
1461	286.4	1573.01
1462	286.5	1032.4
1463	286.6	543.84
1464	286.7	251.39
1465	286.8	183.26
1466	286.9	233.25
1467	287	306.28
1468	287.1	350.07
1469	287.2	357.85
1470	287.3	324.56
1471	287.4	245.59
1472	287.5	128.71
1473	287.6	25.97
1474	287.7	0
1475	287.8	0
1476	287.9	0.68
1477	288	18.35
1478	288.1	29.23
1479	288.2	29.75
1480	288.3	20.81
1481	288.4	9.09
1482	288.5	0
1483	288.9	0
1484	289	1.82
1485	289.1	21.4
1486	289.2	26.41
1487	289.3	16.1
1488	289.4	4.74
1489	289.5	1.76
1490	289.6	0.24
1491	289.7	0
1492	290.2	0
1493	290.3	12.54
1494	290.4	17.58
1495	290.5	6.31
1496	290.6	1.97
1497	290.7	10.24
1498	290.8	11.12
1499	290.9	0
1500	295.7	0
1501	295.8	0.15
1502	295.9	0
1503	296.3	0
1504	296.4	48.56
1505	296.5	181.41
1506	296.6	293.86
1507	296.7	226.13
1508	296.8	0
1509	297.5	0
1510	297.6	41.69
1511	297.7	60.39
1512	297.8	42.69
1513	297.9	0
1514	298.5	0
1515	298.6	21.87
1516	298.7	0
1517	299	0
1518	299.1	6.55
1519	299.2	37.16
1520	299.3	26.34
1521	299.4	9.1
1522	299.5	1.39
1523	299.6	8.14
1524	299.7	0
1525	299.9	0
1526	300	7.58
1527	300.1	11.78
1528	300.2	24.91
1529	300.3	49.67
1530	300.4	61.26
1531	300.5	42.57
1532	300.6	15.86
1533	300.7	14.96
1534	300.8	37.4
1535	300.9	57.16
1536	301	53.01
1537	301.1	23.61
1538	301.2	7.93
1539	301.3	71.07
1540	301.4	268.48
1541	301.5	1166.89
1542	301.6	3323.06
1543	301.7	6840.07
1544	301.8	11369
1545	301.9	16261.9
1546	302	20666.7
1547	302.1	23732.6
1548	302.2	25013.8
1549	302.3	24373.5
1550	302.4	21438.8
1551	302.5	16014.7
1552	302.6	9371.31
1553	302.7	4086.67
1554	302.8	1915.38
1555	302.9	2319.62
1556	303	3635.83
1557	303.1	4595.81
1558	303.2	4882.41
1559	303.3	4646.49
1560	303.4	4006.31
1561	303.5	2968.91
1562	303.6	1695.55
1563	303.7	639.64
1564	303.8	178.53
1565	303.9	184.86
1566	304	343.85
1567	304.1	482.82
1568	304.2	542.46
1569	304.3	526.75
1570	304.4	435.89
1571	304.5	279.1
1572	304.6	126.2
1573	304.7	25.88
1574	304.8	0
1575	304.9	0
1576	305	4.15
1577	305.1	4.54
1578	305.2	2.03
1579	305.3	2.4
1580	305.4	4.92
1581	305.5	5.93
1582	305.6	4.4
1583	305.7	2.71
1584	305.8	2.3
1585	305.9	1.74
1586	306	0
1587	306.4	0
1588	306.5	6.69
1589	306.6	19.27
1590	306.7	23.89
1591	306.8	10.96
1592	306.9	0
1593	307.1	0
1594	307.2	0.33
1595	307.3	3.1
1596	307.4	1.1
1597	307.5	0
1598	307.6	0.6
1599	307.7	5.13
1600	307.8	9.89
1601	307.9	10.72
1602	308	6.93
1603	308.1	1.89
1604	308.2	0
1605	308.4	0
1606	308.5	1.08
1607	308.6	5.64
1608	308.7	5.95
1609	308.8	1.83
1610	308.9	0
1611	309	0.17
1612	309.1	3.5
1613	309.2	4.4
1614	309.3	2.43
1615	309.4	0
1616	309.6	0
1617	309.7	0.47
1618	309.8	4.47
1619	309.9	9.64
1620	310	14.39
1621	310.1	15.22
1622	310.2	8.57
1623	310.3	0
1624	311.5	0
1625	311.6	12.95
1626	311.7	28.45
1627	311.8	20.9
1628	311.9	0
1629	312.5	0
1630	312.6	12.58
1631	312.7	49.35
1632	312.8	57.43
1633	312.9	40
1634	313	17.2
1635	313.1	4.66
1636	313.2	2.02
1637	313.3	3.89
1638	313.4	22.98
1639	313.5	43.92
1640	313.6	47.02
1641	313.7	31.38
1642	313.8	17.47
1643	313.9	21.64
1644	314	32.05
1645	314.1	39.46
1646	314.2	43.38
1647	314.3	41.94
1648	314.4	36.36
1649	314.5	27.77
1650	314.6	19.18
1651	314.7	11.25
1652	314.8	2.14
1653	314.9	0
1654	315.3	0
1655	315.4	2.97
1656	315.5	2.71
1657	315.6	0
1658	317.2	0
1659	317.3	2.43
1660	317.4	14.76
1661	317.5	22.91
1662	317.6	75.33
1663	317.7	195.46
1664	317.8	362.55
1665	317.9	545.8
1666	318	728.46
1667	318.1	881.35
1668	318.2	962.36
1669	318.3	914.92
1670	318.4	711.67
1671	318.5	409.58
1672	318.6	144.51
1673	318.7	50.41
1674	318.8	79.14
1675	318.9	147.26
1676	319	172.11
1677	319.1	154.93
1678	319.2	137.53
1679	319.3	129.17
1680	319.4	109.79
1681	319.5	67.72
1682	319.6	26.1
1683	319.7	3.48
1684	319.8	0
1685	320.1	0
1686	320.2	1.61
1687	320.3	3.68
1688	320.4	3.68
1689	320.5	2.04
1690	320.6	0.67
1691	320.7	0.61
1692	320.8	0.4
1693	320.9	0
1694	321.2	0
1695	321.3	5.74
1696	321.4	7.84
1697	321.5	4.95
1698	321.6	1.61
1699	321.7	0.96
1700	321.8	2.12
1701	321.9	3.39
1702	322	4.37
1703	322.1	4.69
1704	322.2	3.11
1705	322.3	0
1706	323.4	0
1707	323.5	1.09
1708	323.6	6.21
1709	323.7	11.12
1710	323.8	12.62
1711	323.9	10.05
1712	324	6.81
1713	324.1	5.23
1714	324.2	4.19
1715	324.3	2.65
1716	324.4	1.46
1717	324.5	1.27
1718	324.6	1.53
1719	324.7	1.45
1720	324.8	0
1721	325.2	0
1722	325.3	10.04
1723	325.4	13.18
1724	325.5	9.35
1725	325.6	4.32
1726	325.7	1
1727	325.8	0
1728	327.3	0
1729	327.4	1.19
1730	327.5	3.33
1731	327.6	0
1732	329.2	0
1733	329.3	15.91
1734	329.4	5.09
1735	329.5	0
1736	330.7	0
1737	330.8	5.66
1738	330.9	19.44
1739	331	17.12
1740	331.1	0.42
1741	331.2	0
1742	333.1	0
1743	333.2	3.77
1744	333.3	6.01
1745	333.4	0
1746	333.5	0.6
1747	333.6	12.43
1748	333.7	17.5
1749	333.8	11.7
1750	333.9	2.01
1751	334	0
1752	334.2	0
1753	334.3	0.71
1754	334.4	1.29
1755	334.5	0
1756	335.1	0
1757	335.2	3.83
1758	335.3	3.49
1759	335.4	0
1760	337.1	0
1761	337.2	2.28
1762	337.3	4.05
1763	337.4	2.72
1764	337.5	0
1765	339.6	0
1766	339.7	12.81
1767	339.8	30.22
1768	339.9	31.5
1769	340	17.46
1770	340.1	2.37
1771	340.2	0
1772	340.5	0
1773	340.6	1.5
1774	340.7	5.63
1775	340.8	4.6
1776	340.9	0
1777	342.2	0
1778	342.3	1.93
1779	342.4	0.02
1780	342.5	0
1781	343.6	0
1782	343.7	3.48
1783	343.8	7.03
1784	343.9	7.69
1785	344	7.64
1786	344.1	14.71
1787	344.2	31.49
1788	344.3	47.79
1789	344.4	50.53
1790	344.5	38.3
1791	344.6	21.3
1792	344.7	10.56
1793	344.8	9.38
1794	344.9	12.32
1795	345	9.77
1796	345.1	5.45
1797	345.2	14.01
1798	345.3	48.43
1799	345.4	112.66
1800	345.5	428.74
1801	345.6	1437.84
1802	345.7	3270.39
1803	345.8	5830.04
1804	345.9	8821.54
1805	346	11807.9
1806	346.1	14273.7
1807	346.2	15800.6
1808	346.3	16058.1
1809	346.4	14628.2
1810	346.5	11307.9
1811	346.6	6908.48
1812	346.7	3188.75
1813	346.8	1515.36
1814	346.9	1658.44
1815	347	2549.31
1816	347.1	3262.7
1817	347.2	3500.98
1818	347.3	3314.39
1819	347.4	2752.13
1820	347.5	1875.79
1821	347.6	927.94
1822	347.7	261.17
1823	347.8	72.3
1824	347.9	110.85
1825	348	206.99
1826	348.1	284.63
1827	348.2	309.33
1828	348.3	283.28
1829	348.4	213.74
1830	348.5	123.88
1831	348.6	40.91
1832	348.7	0
1833	349.1	0
1834	349.2	35.89
1835	349.3	55.89
1836	349.4	50.2
1837	349.5	27.01
1838	349.6	5.21
1839	349.7	0
1840	349.8	0
1841	349.9	1.01
1842	350	6.84
1843	350.1	12.42
1844	350.2	12.12
1845	350.3	0
1846	351.8	0
1847	351.9	2.36
1848	352	4.92
1849	352.1	7.85
1850	352.2	10.63
1851	352.3	10.85
1852	352.4	7.64
1853	352.5	3.27
1854	352.6	0
1855	353	0
1856	353.1	25.64
1857	353.2	37.88
1858	353.3	25.99
1859	353.4	6.53
1860	353.5	0
1861	354	0
1862	354.1	1.79
1863	354.2	8.58
1864	354.3	7.69
1865	354.4	0
1866	355.1	0
1867	355.2	4.41
1868	355.3	12.29
1869	355.4	6.83
1870	355.5	0
1871	357.2	0
1872	357.3	5.25
1873	357.4	15.51
1874	357.5	18.62
1875	357.6	9.73
1876	357.7	0
1877	358.2	0
1878	358.3	0.55
1879	358.4	9.96
1880	358.5	8.2
1881	358.6	1.83
1882	358.7	0
1883	358.8	0
1884	358.9	1.82
1885	359	5.61
1886	359.1	9.43
1887	359.2	12.06
1888	359.3	10.7
1889	359.4	4.66
1890	359.5	0
1891	359.6	0
1892	359.7	0.36
1893	359.8	12.32
1894	359.9	14.74
1895	360	4.08
1896	360.1	0
1897	361	0
1898	361.1	8.17
1899	361.2	12.79
1900	361.3	7.43
1901	361.4	3.33
1902	361.5	22.18
1903	361.6	65.94
1904	361.7	148.96
1905	361.8	269.48
1906	361.9	399
1907	362	497.93
1908	362.1	557.86
1909	362.2	602.3
1910	362.3	617.08
1911	362.4	541.54
1912	362.5	364.22
1913	362.6	171.88
1914	362.7	68.03
1915	362.8	48.78
1916	362.9	53.62
1917	363	51.45
1918	363.1	42.54
1919	363.2	45.66
1920	363.3	57.03
1921	363.4	61
1922	363.5	48.08
1923	363.6	26.37
1924	363.7	9.5
1925	363.8	1.73
1926	363.9	1.85
1927	364	1.42
1928	364.1	0.63
1929	364.2	0
1930	364.3	0
1931	364.4	0.46
1932	364.5	0.18
1933	364.6	0
1934	364.7	0
1935	364.8	4.5
1936	364.9	13.63
1937	365	18.48
1938	365.1	14.95
1939	365.2	7.27
1940	365.3	1.18
1941	365.4	0
1942	365.9	0
1943	366	2.46
1944	366.1	0.49
1945	366.2	0
1946	366.4	0
1947	366.5	6.45
1948	366.6	14.93
1949	366.7	16.36
1950	366.8	6.11
1951	366.9	0
1952	367.1	0
1953	367.2	5.35
1954	367.3	15.33
1955	367.4	11.71
1956	367.5	2.76
1957	367.6	0
1958	367.8	0
1959	367.9	0.76
1960	368	0.55
1961	368.1	0.74
1962	368.2	3.82
1963	368.3	7.97
1964	368.4	8.9
1965	368.5	5.62
1966	368.6	1.45
1967	368.7	0
1968	368.8	0
1969	368.9	1.44
1970	369	3.32
1971	369.1	3.76
1972	369.2	0.32
1973	369.3	0
1974	369.6	0
1975	369.7	3.89
1976	369.8	13.95
1977	369.9	37.38
1978	370	59.59
1979	370.1	59.14
1980	370.2	7.22
1981	370.3	0
1982	370.5	0
1983	370.6	28.33
1984	370.7	184.2
1985	370.8	256.37
1986	370.9	214.62
1987	371	173.35
1988	371.1	239.99
1989	371.2	328.67
1990	371.3	274.49
1991	371.4	92.66
1992	371.5	0
1993	371.6	7.43
1994	371.7	94.78
1995	371.8	237.88
1996	371.9	400.19
1997	372	491.62
[truncated: 1,522 more rows]

## Sheet: Sheet10
+ESI Scan (rt: 10.75-11.01 min, 57 scans) Frag=100.0V CF=0.000 DF=0.000 4608-01.d Subtract
Index	X	Y
0	50	0
1	50.4	0
2	50.5	0.08
3	50.6	1.61
4	50.7	3.21
5	50.8	3.89
6	50.9	3.07
7	51	1.43
8	51.1	0.36
9	51.2	0.38
10	51.3	0.7
11	51.4	0.51
12	51.5	0
13	51.7	0
14	51.8	0.24
15	51.9	0.48
16	52	0.56
17	52.1	0.36
18	52.2	0.01
19	52.3	0
20	52.4	0
21	52.5	0.04
22	52.6	0
23	52.7	0
24	52.8	0.37
25	52.9	1.51
26	53	2.38
27	53.1	2.23
28	53.2	1.43
29	53.3	0.93
30	53.4	0.89
31	53.5	0.72
32	53.6	0.19
33	53.7	0
34	53.9	0
35	54	0.08
36	54.1	0.68
37	54.2	0.79
38	54.3	0
39	54.6	0
40	54.7	0.03
41	54.8	38.2
42	54.9	116.81
43	55	200.04
44	55.1	236.47
45	55.2	211.06
46	55.3	148.64
47	55.4	89
48	55.5	45.95
49	55.6	18.7
50	55.7	5.69
51	55.8	0
52	56.2	0
53	56.3	2.69
54	56.4	15.92
55	56.5	17.84
56	56.6	0
57	56.9	0
58	57	53.1
59	57.1	105.2
60	57.2	82.51
61	57.3	0
62	57.7	0
63	57.8	6.61
64	57.9	0
65	58	2.67
66	58.1	11.9
67	58.2	5.73
68	58.3	0.98
69	58.4	47.24
70	58.5	164.91
71	58.6	325.08
72	58.7	370.77
73	58.8	240.87
74	58.9	87.5
75	59	130.62
76	59.1	430.16
77	59.2	718.08
78	59.3	713.72
79	59.4	508.23
80	59.5	371.08
81	59.6	309.46
82	59.7	133.88
83	59.8	0
84	60	0
85	60.1	305.76
86	60.2	339.19
87	60.3	42.16
88	60.4	0
89	60.6	0
90	60.7	108.2
91	60.8	387.17
92	60.9	554.12
93	61	645.18
94	61.1	727.18
95	61.2	851.82
96	61.3	965.24
97	61.4	892.35
98	61.5	556.09
99	61.6	155.02
100	61.7	0
101	61.8	0.53
102	61.9	10.96
103	62	0
104	62.2	0
105	62.3	19.74
106	62.4	67.52
107	62.5	41.76
108	62.6	6.98
109	62.7	0
110	62.8	0
111	62.9	3.92
112	63	12.02
113	63.1	23.16
114	63.2	34.19
115	63.3	34.4
116	63.4	17.97
117	63.5	0
118	64.3	0
119	64.4	15.98
120	64.5	28.94
121	64.6	13.08
122	64.7	1.96
123	64.8	0
124	65.2	0
125	65.3	0.03
126	65.4	0.73
127	65.5	0.66
128	65.6	0.22
129	65.7	0.15
130	65.8	0.54
131	65.9	0.98
132	66	1.15
133	66.1	0.98
134	66.2	0.61
135	66.3	0.34
136	66.4	0.32
137	66.5	0.25
138	66.6	0
139	67.3	0
140	67.4	0.94
141	67.5	1.6
142	67.6	1.06
143	67.7	0.15
144	67.8	0.05
145	67.9	0.11
146	68	0
147	68.2	0
148	68.3	4.76
149	68.4	14.9
150	68.5	23.87
151	68.6	0.27
152	68.7	0
153	68.9	0
154	69	0.3
155	69.1	13.21
156	69.2	0
157	70.2	0
158	70.3	80.95
159	70.4	112.35
160	70.5	103.39
161	70.6	65.18
162	70.7	0
163	71.2	0
164	71.3	13.34
165	71.4	51.03
166	71.5	12.11
167	71.6	0
168	73	0
169	73.1	252.85
170	73.2	516.36
171	73.3	477.4
172	73.4	0
173	74.1	0
174	74.2	12.68
175	74.3	212.19
176	74.4	236.88
177	74.5	119.76
178	74.6	0
179	74.7	0
180	74.8	32.85
181	74.9	109.72
182	75	159.64
183	75.1	145.95
184	75.2	89.61
185	75.3	36.22
186	75.4	8.24
187	75.5	0
188	76.8	0
189	76.9	43.81
190	77	132.01
191	77.1	107.86
192	77.2	0
193	77.5	0
194	77.6	104.95
195	77.7	188.36
196	77.8	186.66
197	77.9	207.46
198	78	271.96
199	78.1	327.96
200	78.2	303.72
201	78.3	220
202	78.4	144.1
203	78.5	68.25
204	78.6	0
205	80.4	0
206	80.5	2.92
207	80.6	19.46
208	80.7	0
209	81.1	0
210	81.2	14.6
211	81.3	65.43
212	81.4	137.83
213	81.5	189.97
214	81.6	174.31
215	81.7	58
216	81.8	0
217	82.9	0
218	83	33.7
219	83.1	147.05
220	83.2	159.91
221	83.3	72.21
222	83.4	0
223	83.5	0
224	83.6	56.56
225	83.7	73.38
226	83.8	51.38
227	83.9	19.98
228	84	1.89
229	84.1	0
230	84.4	0
231	84.5	24.59
232	84.6	60.05
233	84.7	33.15
234	84.8	0
235	84.9	0
236	85	15.76
237	85.1	19.3
238	85.2	0
239	85.7	0
240	85.8	0.54
241	85.9	1.77
242	86	0
243	86.9	0
244	87	196.92
245	87.1	386.06
246	87.2	455.31
247	87.3	371.99
248	87.4	189.7
249	87.5	17.34
250	87.6	0
251	87.7	0
252	87.8	5.58
253	87.9	13.72
254	88	0.6
255	88.1	9.46
256	88.2	34.03
257	88.3	0
258	88.5	0
259	88.6	470.48
260	88.7	1423.23
261	88.8	2024.99
262	88.9	1937.29
263	89	1229.82
264	89.1	236.29
265	89.2	0
266	89.5	0
267	89.6	33.09
268	89.7	224.87
269	89.8	0
270	89.9	111.24
271	90	61.13
272	90.1	69.29
273	90.2	80.12
274	90.3	113.35
275	90.4	180.93
276	90.5	203.08
277	90.6	125.1
278	90.7	4.65
279	90.8	0
280	91	0
281	91.1	11.98
282	91.2	0
283	92.3	0
284	92.4	10.26
285	92.5	9.04
286	92.6	0
287	92.9	0
288	93	6.21
289	93.1	8.67
290	93.2	1.46
291	93.3	0
292	93.5	0
293	93.6	0.4
294	93.7	1.42
295	93.8	0
296	94.3	0
297	94.4	1.7
298	94.5	7.68
299	94.6	23.01
300	94.7	47.45
301	94.8	61.01
302	94.9	44.38
303	95	0
304	95.3	0
305	95.4	2.8
306	95.5	18.33
307	95.6	11.13
308	95.7	5.06
309	95.8	0
310	97.7	0
311	97.8	3.26
312	97.9	24.1
313	98	108.01
314	98.1	213.12
315	98.2	223.77
316	98.3	152.38
317	98.4	84.68
318	98.5	0.04
319	98.6	0
320	99.7	0
321	99.8	34.94
322	99.9	75.57
323	100	142.63
324	100.1	190.19
325	100.2	161.19
326	100.3	81.6
327	100.4	1.6
328	100.5	0
329	101	0
330	101.1	401.88
331	101.2	646.24
332	101.3	569.68
333	101.4	361.98
334	101.5	319.72
335	101.6	463.61
336	101.7	522.07
337	101.8	292.73
338	101.9	34.38
339	102	153.91
340	102.1	591.26
341	102.2	872.07
342	102.3	765.25
343	102.4	501.99
344	102.5	336.03
345	102.6	268.36
346	102.7	161.01
347	102.8	105.47
348	102.9	33.91
349	103	0
350	103.1	1.28
351	103.2	83.15
352	103.3	148.2
353	103.4	155.04
354	103.5	118.25
355	103.6	89.49
356	103.7	70.96
357	103.8	95
358	103.9	146.74
359	104	128.04
360	104.1	47.14
361	104.2	0
362	104.4	0
363	104.5	11.17
364	104.6	67.21
365	104.7	109.58
366	104.8	133.95
367	104.9	165.56
368	105	186.26
369	105.1	160.72
370	105.2	47.14
371	105.3	0
372	105.8	0
373	105.9	10.57
374	106	18
375	106.1	0
376	106.6	0
377	106.7	96.34
378	106.8	332.52
379	106.9	451.23
380	107	400.24
381	107.1	248.13
382	107.2	85.59
383	107.3	0
384	107.5	0
385	107.6	15.15
386	107.7	92.04
387	107.8	105.72
388	107.9	116.71
389	108	136.51
390	108.1	124.23
391	108.2	62.78
392	108.3	7.06
393	108.4	0
394	108.7	0
395	108.8	16.14
396	108.9	77.52
397	109	81.39
398	109.1	41.69
399	109.2	13.74
400	109.3	7.19
401	109.4	0.68
402	109.5	0
403	109.6	0
404	109.7	14.95
405	109.8	47.27
406	109.9	68.11
407	110	58.47
408	110.1	18.46
409	110.2	0
410	110.6	0
411	110.7	39.64
412	110.8	64.03
413	110.9	38.64
414	111	19.87
415	111.1	56.49
416	111.2	104.94
417	111.3	87.76
418	111.4	9.99
419	111.5	0
420	112.1	0
421	112.2	31.71
422	112.3	71.14
423	112.4	68.33
424	112.5	74.74
425	112.6	146.19
426	112.7	289.48
427	112.8	393.46
428	112.9	366.28
429	113	226.16
430	113.1	73.73
431	113.2	0
432	115.3	0
433	115.4	198.59
434	115.5	230.26
435	115.6	98.87
436	115.7	6.88
437	115.8	10.95
438	115.9	31.95
439	116	28.88
440	116.1	0
441	116.5	0
442	116.6	46.93
443	116.7	177.46
444	116.8	308.3
445	116.9	399.8
446	117	444.5
447	117.1	445.43
448	117.2	395.65
449	117.3	290.01
450	117.4	157.63
451	117.5	53.03
452	117.6	0
453	117.7	0
454	117.8	19.39
455	117.9	29.86
456	118	15.01
457	118.1	0
458	118.2	0
459	118.3	81.2
460	118.4	390.98
461	118.5	864.6
462	118.6	1382.56
463	118.7	1830.57
464	118.8	2281.59
465	118.9	2793.25
466	119	3279.77
467	119.1	3570.99
468	119.2	3512.43
469	119.3	2999.42
470	119.4	2065.43
471	119.5	1000.13
472	119.6	231.62
473	119.7	30.13
474	119.8	155.07
475	119.9	315.28
476	120	337.03
477	120.1	268.04
478	120.2	211.73
479	120.3	197.07
480	120.4	170.05
481	120.5	0
482	121.7	0
483	121.8	63.56
484	121.9	242.2
485	122	287.88
486	122.1	142.41
487	122.2	0
488	122.4	0
489	122.5	53.59
490	122.6	89.06
491	122.7	49.08
492	122.8	0.46
493	122.9	6.63
494	123	77.84
495	123.1	142.78
496	123.2	129.58
497	123.3	54.92
498	123.4	1.63
499	123.5	0
500	123.6	36.74
501	123.7	68.51
502	123.8	68.64
503	123.9	40.15
504	124	21.7
505	124.1	45.18
506	124.2	84.45
507	124.3	85.7
508	124.4	37.1
509	124.5	0
510	125.2	0
511	125.3	16.32
512	125.4	10.26
513	125.5	5.96
514	125.6	0
515	126.2	0
516	126.3	3.68
517	126.4	1.74
518	126.5	20
519	126.6	35.44
520	126.7	41.66
521	126.8	60.92
522	126.9	98.88
523	127	101.71
524	127.1	36.48
525	127.2	0
526	127.4	0
527	127.5	0.55
528	127.6	15.71
529	127.7	16.24
530	127.8	17.43
531	127.9	11.08
532	128	0
533	128.1	0
534	128.2	9.35
535	128.3	59.16
536	128.4	114.71
537	128.5	179.8
538	128.6	244.84
539	128.7	237.68
540	128.8	169.1
541	128.9	120.03
542	129	119.46
543	129.1	65.23
544	129.2	0
545	129.6	0
546	129.7	34.12
547	129.8	65.44
548	129.9	82.53
549	130	85.25
550	130.1	57.47
551	130.2	14.01
552	130.3	10.75
553	130.4	72.56
554	130.5	183.56
555	130.6	247.14
556	130.7	212.1
557	130.8	92.04
558	130.9	0
559	131.8	0
560	131.9	22.72
561	132	30.42
562	132.1	20.38
563	132.2	0
564	132.4	0
565	132.5	51.8
566	132.6	114.14
567	132.7	109.28
568	132.8	5.64
569	132.9	0
570	133.2	0
571	133.3	136.26
572	133.4	219.43
573	133.5	90.83
574	133.6	0
575	134	0
576	134.1	36.26
577	134.2	123.73
578	134.3	204.34
579	134.4	261.42
580	134.5	317.84
581	134.6	426.65
582	134.7	598.91
583	134.8	792.46
584	134.9	927.7
585	135	959.78
586	135.1	908.63
587	135.2	806.68
588	135.3	649.49
589	135.4	427.07
590	135.5	194.82
591	135.6	50.77
592	135.7	0
593	136.6	0
594	136.7	129.41
595	136.8	383
596	136.9	393.01
597	137	89
598	137.1	0
599	137.3	0
600	137.4	140.96
601	137.5	179.26
602	137.6	109.46
603	137.7	0
604	137.9	0
605	138	84.76
606	138.1	121.27
607	138.2	85.47
608	138.3	12.84
609	138.4	0
610	139.2	0
611	139.3	2.51
612	139.4	12.49
613	139.5	8.85
614	139.6	0
615	140.5	0
616	140.6	32.37
617	140.7	59.68
618	140.8	66.57
619	140.9	80.9
620	141	97.67
621	141.1	78.75
622	141.2	6.8
623	141.3	0
624	141.5	0
625	141.6	82.73
626	141.7	159.1
627	141.8	157.76
628	141.9	57.71
629	142	0
630	143.2	0
631	143.3	3.63
632	143.4	49.73
633	143.5	68.09
634	143.6	38.64
635	143.7	8.74
636	143.8	21.53
637	143.9	51.34
638	144	54.48
639	144.1	0
640	144.8	0
641	144.9	119.07
642	145	313.53
643	145.1	376.52
644	145.2	337.28
645	145.3	253.52
646	145.4	128.14
647	145.5	0
648	145.8	0
649	145.9	23.02
650	146	27.33
651	146.1	0
652	146.4	0
653	146.5	7.99
654	146.6	83.02
655	146.7	122.77
656	146.8	140.22
657	146.9	148.88
658	147	135.33
659	147.1	96.78
660	147.2	55.33
661	147.3	55.22
662	147.4	68.53
663	147.5	66.5
664	147.6	36.52
665	147.7	8.44
666	147.8	0
667	148.7	0
668	148.8	38.51
669	148.9	35.63
670	149	0
671	149.5	0
672	149.6	52.05
673	149.7	87.93
674	149.8	91.25
675	149.9	23.16
676	150	0
677	150.3	0
678	150.4	65.63
679	150.5	112.25
680	150.6	77.8
681	150.7	0.16
682	150.8	0
683	150.9	62.87
684	151	157.42
685	151.1	173.86
686	151.2	114.64
687	151.3	64.95
688	151.4	51.24
689	151.5	45.89
690	151.6	22.73
691	151.7	17.89
692	151.8	27.52
693	151.9	41.49
694	152	40.35
695	152.1	40.6
696	152.2	50.08
697	152.3	73.91
698	152.4	75.59
699	152.5	0
700	153.7	0
701	153.8	105.13
702	153.9	245.73
703	154	227.35
704	154.1	61.62
705	154.2	0
706	154.4	0
707	154.5	56.38
708	154.6	46.9
709	154.7	0
710	155	0
711	155.1	2.81
712	155.2	39.42
713	155.3	72.77
714	155.4	88.35
715	155.5	71.2
716	155.6	46.9
717	155.7	31.31
718	155.8	22.51
719	155.9	7.8
720	156	0
721	156.1	15.29
722	156.2	56.19
723	156.3	96.46
724	156.4	113.94
725	156.5	48.61
726	156.6	0
727	156.8	0
728	156.9	41.19
729	157	137.36
730	157.1	212.33
731	157.2	238.1
732	157.3	184.56
733	157.4	91.57
734	157.5	3.28
735	157.6	0
736	157.8	0
737	157.9	5.63
738	158	9.85
739	158.1	6.4
740	158.2	9.56
741	158.3	12.91
742	158.4	3.6
743	158.5	0
744	158.6	21.99
745	158.7	60.42
746	158.8	49.92
747	158.9	0
748	159.1	0
749	159.2	10.72
750	159.3	84.35
751	159.4	93.47
752	159.5	59.24
753	159.6	16.41
754	159.7	0
755	160.1	0
756	160.2	17.8
757	160.3	84.52
758	160.4	163.22
759	160.5	169.6
760	160.6	96.43
761	160.7	16.86
762	160.8	0
763	161	0
764	161.1	48.73
765	161.2	194.64
766	161.3	304.27
767	161.4	267.62
768	161.5	118.31
769	161.6	4.78
770	161.7	0
771	162.2	0
772	162.3	0.93
773	162.4	0
774	163.2	0
775	163.3	14.38
776	163.4	29.25
777	163.5	9.52
778	163.6	0
779	164	0
780	164.1	4.58
781	164.2	5.07
782	164.3	3.81
783	164.4	0
784	164.7	0
785	164.8	7.46
786	164.9	25.22
787	165	19.07
788	165.1	1.39
789	165.2	0
790	165.3	0
791	165.4	0.53
792	165.5	0
793	165.7	0
794	165.8	0.99
795	165.9	4.07
796	166	1.22
797	166.1	0
798	166.5	0
799	166.6	21.93
800	166.7	48.81
801	166.8	73.96
802	166.9	101.58
803	167	128.21
804	167.1	138.4
805	167.2	114.15
806	167.3	61.95
807	167.4	12.3
808	167.5	0
809	167.9	0
810	168	5.55
811	168.1	22.95
812	168.2	28.65
813	168.3	17.69
814	168.4	5.68
815	168.5	8.33
816	168.6	23.32
817	168.7	46.07
818	168.8	62.92
819	168.9	65.95
820	169	56.13
821	169.1	42.57
822	169.2	34.01
823	169.3	27.7
824	169.4	23.93
825	169.5	23.14
826	169.6	25.3
827	169.7	23.85
828	169.8	4.52
829	169.9	0
830	170	0
831	170.1	11.1
832	170.2	37.06
833	170.3	6.72
834	170.4	0
835	170.5	0
836	170.6	8.2
837	170.7	106.71
838	170.8	129.72
839	170.9	35.06
840	171	0
841	171.2	0
842	171.3	30.85
843	171.4	60.29
844	171.5	31.97
845	171.6	0
846	172.2	0
847	172.3	2.43
848	172.4	44.2
849	172.5	37.13
850	172.6	0
851	173.3	0
852	173.4	12.9
853	173.5	11.51
854	173.6	2.48
855	173.7	0
856	174	0
857	174.1	16.01
858	174.2	13.75
859	174.3	0
860	174.5	0
861	174.6	31.63
862	174.7	74.07
863	174.8	98.8
864	174.9	91.96
865	175	62.65
866	175.1	37.15
867	175.2	25.19
868	175.3	20.12
869	175.4	17.06
870	175.5	10.88
871	175.6	0
872	176.1	0
873	176.2	6.2
874	176.3	23.26
875	176.4	27.34
876	176.5	4.2
877	176.6	0
878	176.9	0
879	177	44.88
880	177.1	92.57
881	177.2	107.46
882	177.3	81.73
883	177.4	39.79
884	177.5	0
885	177.6	0
886	177.7	11.29
887	177.8	34.65
888	177.9	37.79
889	178	16.13
890	178.1	0
891	178.2	0
892	178.3	10.05
893	178.4	23.34
894	178.5	12.81
895	178.6	0
896	178.7	4.21
897	178.8	29.74
898	178.9	48.51
899	179	46.12
900	179.1	31.7
901	179.2	8.68
902	179.3	0
903	179.5	0
904	179.6	6.48
905	179.7	10.22
906	179.8	0.12
907	179.9	0
908	180.1	0
909	180.2	5.06
910	180.3	23.64
911	180.4	29.58
912	180.5	35.66
913	180.6	59.2
914	180.7	86.16
915	180.8	97.44
916	180.9	89.2
917	181	73.87
918	181.1	57.4
919	181.2	37.47
920	181.3	17.63
921	181.4	7.95
922	181.5	6.93
923	181.6	9.45
924	181.7	17.6
925	181.8	29.38
926	181.9	48.76
927	182	67.59
928	182.1	72.07
929	182.2	55.81
930	182.3	30.91
931	182.4	29.97
932	182.5	64.01
933	182.6	109.73
934	182.7	135.37
935	182.8	125.9
936	182.9	85.73
937	183	43.34
938	183.1	22.95
939	183.2	33.64
940	183.3	56.54
941	183.4	69.58
942	183.5	58.46
943	183.6	41.79
944	183.7	40.01
945	183.8	49.85
946	183.9	59.74
947	184	61.26
948	184.1	54.02
949	184.2	39.09
950	184.3	11.15
951	184.4	0
952	185.5	0
953	185.6	26.68
954	185.7	55.54
955	185.8	46.01
956	185.9	41.02
957	186	57.53
958	186.1	71.44
959	186.2	63.98
960	186.3	34.03
961	186.4	0
962	186.8	0
963	186.9	12.77
964	187	40.56
965	187.1	53.28
966	187.2	43
967	187.3	12.86
968	187.4	0
969	187.6	0
970	187.7	6.33
971	187.8	23.76
972	187.9	22.7
973	188	11.9
974	188.1	5.71
975	188.2	7.9
976	188.3	9.07
977	188.4	7.5
978	188.5	3.63
979	188.6	2.31
980	188.7	1.87
981	188.8	12.84
982	188.9	33.92
983	189	44.95
984	189.1	26.96
985	189.2	0
986	189.4	0
987	189.5	4.26
988	189.6	20.42
989	189.7	28.54
990	189.8	32.64
991	189.9	30.78
992	190	18.26
993	190.1	1.85
994	190.2	5.7
995	190.3	32.67
996	190.4	60.51
997	190.5	69.07
998	190.6	64.39
999	190.7	65.87
1000	190.8	80.73
1001	190.9	104.21
1002	191	101.18
1003	191.1	54.01
1004	191.2	0
1005	191.4	0
1006	191.5	2.61
1007	191.6	16.21
1008	191.7	5.39
1009	191.8	0
1010	191.9	0
1011	192	1.15
1012	192.1	0
1013	193.3	0
1014	193.4	1.23
1015	193.5	51.17
1016	193.6	78.08
1017	193.7	80.83
1018	193.8	52.88
1019	193.9	3.55
1020	194	0
1021	194.3	0
1022	194.4	36.15
1023	194.5	78.61
1024	194.6	101.89
1025	194.7	78.97
1026	194.8	10.59
1027	194.9	0
1028	195.2	0
1029	195.3	7.88
1030	195.4	8.97
1031	195.5	0
1032	195.6	0
1033	195.7	7.54
1034	195.8	18.05
1035	195.9	18.75
1036	196	9.23
1037	196.1	0
1038	196.3	0
1039	196.4	6.38
1040	196.5	27.35
1041	196.6	32.07
1042	196.7	25.01
1043	196.8	22.08
1044	196.9	26.44
1045	197	34.48
1046	197.1	45.52
1047	197.2	51.09
1048	197.3	42.03
1049	197.4	21.84
1050	197.5	5.89
1051	197.6	4.71
1052	197.7	10.72
1053	197.8	8.35
1054	197.9	0
1055	198.1	0
1056	198.2	19.87
1057	198.3	27.65
1058	198.4	10.95
1059	198.5	0
1060	201	0
1061	201.1	28.59
1062	201.2	47.42
1063	201.3	27.63
1064	201.4	0
1065	201.6	0
1066	201.7	20.52
1067	201.8	37.01
1068	201.9	33.36
1069	202	16.59
1070	202.1	4.56
1071	202.2	6.37
1072	202.3	14.22
1073	202.4	22.52
1074	202.5	30.34
1075	202.6	31.69
1076	202.7	20.97
1077	202.8	5.98
1078	202.9	0.86
1079	203	4.47
1080	203.1	2.12
1081	203.2	0
1082	203.5	0
1083	203.6	13.19
1084	203.7	22.09
1085	203.8	22.5
1086	203.9	20.47
1087	204	17.61
1088	204.1	12.69
1089	204.2	8.86
1090	204.3	12.88
1091	204.4	16.41
1092	204.5	0
1093	205.2	0
1094	205.3	41.77
1095	205.4	46.29
1096	205.5	29.97
1097	205.6	22.78
1098	205.7	26.4
1099	205.8	24.64
1100	205.9	27.25
1101	206	34.8
1102	206.1	47.6
1103	206.2	63.77
1104	206.3	90.06
1105	206.4	129.21
1106	206.5	134.37
1107	206.6	39.75
1108	206.7	0
1109	206.8	0
1110	206.9	0.71
1111	207	156.9
1112	207.1	229.22
1113	207.2	208.57
1114	207.3	161.09
1115	207.4	112.25
1116	207.5	58.72
1117	207.6	19.61
1118	207.7	16.9
1119	207.8	16.1
1120	207.9	22.05
1121	208	39.8
1122	208.1	55.94
1123	208.2	52.09
1124	208.3	28.92
1125	208.4	2.98
1126	208.5	0
1127	209.5	0
1128	209.6	2.8
1129	209.7	6.7
1130	209.8	0
1131	210.2	0
1132	210.3	3.49
1133	210.4	16.5
1134	210.5	24.41
1135	210.6	34.78
1136	210.7	43.16
1137	210.8	42.82
1138	210.9	23.06
1139	211	0
1140	211.4	0
1141	211.5	10.23
1142	211.6	7.08
1143	211.7	0
1144	212	0
1145	212.1	5.46
1146	212.2	8.45
1147	212.3	7.72
1148	212.4	7.86
1149	212.5	8.45
1150	212.6	5.78
1151	212.7	0
1152	212.8	0
1153	212.9	15.14
1154	213	40.62
1155	213.1	52.95
1156	213.2	42.33
1157	213.3	20.64
1158	213.4	5.58
1159	213.5	0.07
1160	213.6	4.08
1161	213.7	16.44
1162	213.8	26.82
1163	213.9	25.25
1164	214	12.82
1165	214.1	0
1166	214.4	0
1167	214.5	2.22
1168	214.6	19.09
1169	214.7	19.81
1170	214.8	6.89
1171	214.9	0
1172	215.5	0
1173	215.6	27.34
1174	215.7	35.1
1175	215.8	23.93
1176	215.9	2.04
1177	216	0
1178	216.4	0
1179	216.5	11.02
1180	216.6	31.33
1181	216.7	43.14
1182	216.8	32.22
1183	216.9	1.61
1184	217	0
1185	217.3	0
1186	217.4	22.41
1187	217.5	42.04
1188	217.6	36.51
1189	217.7	17.07
1190	217.8	0
1191	219.4	0
1192	219.5	12.3
1193	219.6	30.25
1194	219.7	39.63
1195	219.8	8.61
1196	219.9	0
1197	220.2	0
1198	220.3	7.54
1199	220.4	14.41
1200	220.5	31.86
1201	220.6	63.81
1202	220.7	63.56
1203	220.8	7.97
1204	220.9	0
1205	221.3	0
1206	221.4	16.57
1207	221.5	35.11
1208	221.6	29.17
1209	221.7	3.54
1210	221.8	0
1211	222	0
1212	222.1	10.71
1213	222.2	49.77
1214	222.3	37.97
1215	222.4	0
1216	223.2	0
1217	223.3	7.71
1218	223.4	361.87
1219	223.5	281.33
1220	223.6	153.28
1221	223.7	255.68
1222	223.8	324.06
1223	223.9	130.63
1224	224	0
1225	224.3	0
1226	224.4	53.31
1227	224.5	173.71
1228	224.6	229.35
1229	224.7	275.19
1230	224.8	325.17
1231	224.9	368.05
1232	225	417.38
1233	225.1	514.71
1234	225.2	610.72
1235	225.3	575.35
1236	225.4	379.28
1237	225.5	159.79
1238	225.6	52.04
1239	225.7	30.92
1240	225.8	0
1241	226.6	0
1242	226.7	35.07
1243	226.8	100.9
1244	226.9	80.46
1245	227	0
1246	227.4	0
1247	227.5	20.64
1248	227.6	64.27
1249	227.7	65.04
1250	227.8	35.53
1251	227.9	0
1252	228.3	0
1253	228.4	15.07
1254	228.5	29.54
1255	228.6	10.63
1256	228.7	0
1257	228.8	5.57
1258	228.9	24.92
1259	229	39.92
1260	229.1	39.5
1261	229.2	23.41
1262	229.3	0
1263	229.7	0
1264	229.8	17.08
1265	229.9	35.24
1266	230	51.06
1267	230.1	50.66
1268	230.2	22.4
1269	230.3	0
1270	231.6	0
1271	231.7	10.39
1272	231.8	13.48
1273	231.9	12.12
1274	232	13.55
1275	232.1	18.69
1276	232.2	23.31
1277	232.3	30.17
1278	232.4	35.88
1279	232.5	26.51
1280	232.6	0
1281	233.2	0
1282	233.3	0.72
1283	233.4	14.06
1284	233.5	15.77
1285	233.6	8.92
1286	233.7	2.28
1287	233.8	0
1288	234	0
1289	234.1	7.7
1290	234.2	38.86
1291	234.3	91.57
1292	234.4	155.39
1293	234.5	224.53
1294	234.6	282.69
1295	234.7	347.28
1296	234.8	436.48
1297	234.9	558.84
1298	235	632.25
1299	235.1	582.34
1300	235.2	449.25
1301	235.3	332.43
1302	235.4	241.16
1303	235.5	166.13
1304	235.6	107.15
1305	235.7	68.28
1306	235.8	50.69
1307	235.9	39.05
1308	236	29.93
1309	236.1	32.55
1310	236.2	41.15
1311	236.3	47.29
1312	236.4	37.42
1313	236.5	2.84
1314	236.6	0
1315	237.5	0
1316	237.6	10.8
1317	237.7	14.36
1318	237.8	12.54
1319	237.9	0
1320	238.3	0
1321	238.4	1.86
1322	238.5	28.96
1323	238.6	32.12
1324	238.7	28.23
1325	238.8	16.31
1326	238.9	0
1327	239.8	0
1328	239.9	12.41
1329	240	12.32
1330	240.1	0
1331	240.3	0
1332	240.4	3.96
1333	240.5	25.83
1334	240.6	44.45
1335	240.7	56.83
1336	240.8	53.23
1337	240.9	28.04
1338	241	0
1339	241.3	0
1340	241.4	9.74
1341	241.5	26.79
1342	241.6	26.31
1343	241.7	9.51
1344	241.8	0
1345	241.9	0
1346	242	5.36
1347	242.1	16.81
1348	242.2	12.12
1349	242.3	0
1350	243	0
1351	243.1	5.72
1352	243.2	5.7
1353	243.3	4.04
1354	243.4	1.38
1355	243.5	0
1356	244.4	0
1357	244.5	14.36
1358	244.6	25.62
1359	244.7	0
1360	245.5	0
1361	245.6	8.04
1362	245.7	4.87
1363	245.8	0
1364	246.3	0
1365	246.4	7.44
1366	246.5	16.8
1367	246.6	24.76
1368	246.7	28.88
1369	246.8	30.18
1370	246.9	33.89
1371	247	48.29
1372	247.1	72.02
1373	247.2	88.87
1374	247.3	80.89
1375	247.4	54.85
1376	247.5	31.46
1377	247.6	21.88
1378	247.7	9.9
1379	247.8	0
1380	248.2	0
1381	248.3	6.69
1382	248.4	25.33
1383	248.5	73.94
1384	248.6	115.4
1385	248.7	93.75
1386	248.8	0
1387	251.4	0
1388	251.5	21.17
1389	251.6	31.64
1390	251.7	26.33
1391	251.8	8.2
1392	251.9	0
1393	252.4	0
1394	252.5	13.59
1395	252.6	46.1
1396	252.7	51.62
1397	252.8	44.8
1398	252.9	45.11
1399	253	55.57
1400	253.1	59.46
1401	253.2	48.21
1402	253.3	28.99
1403	253.4	18.91
1404	253.5	13
1405	253.6	13.09
1406	253.7	11.96
1407	253.8	7.3
1408	253.9	2.13
1409	254	0
1410	254.2	0
1411	254.3	4.14
1412	254.4	13.5
1413	254.5	25.71
1414	254.6	39.86
1415	254.7	48.91
1416	254.8	42.87
1417	254.9	15.7
1418	255	0
1419	255.2	0
1420	255.3	8.73
1421	255.4	41.96
1422	255.5	68.63
1423	255.6	98.05
1424	255.7	127.41
1425	255.8	120.65
1426	255.9	90.13
1427	256	95.49
1428	256.1	163.65
1429	256.2	224.44
1430	256.3	207.98
1431	256.4	131.04
1432	256.5	51.94
1433	256.6	2.15
1434	256.7	0
1435	256.9	0
1436	257	7.43
1437	257.1	10.72
1438	257.2	4.05
1439	257.3	0
1440	257.4	0
1441	257.5	5.58
1442	257.6	14.6
1443	257.7	32.41
1444	257.8	59.47
1445	257.9	90.69
1446	258	108.96
1447	258.1	102.02
1448	258.2	79.04
1449	258.3	55.72
1450	258.4	34.03
1451	258.5	1.13
1452	258.6	0
1453	259.3	0
1454	259.4	2.86
1455	259.5	5.04
1456	259.6	3.16
1457	259.7	1.62
1458	259.8	1.87
1459	259.9	1.94
1460	260	1.56
1461	260.1	1.25
1462	260.2	1.33
1463	260.3	2.02
1464	260.4	2.95
1465	260.5	0.41
1466	260.6	0
1467	261.1	0
1468	261.2	4.41
1469	261.3	0
1470	262.9	0
1471	263	20.3
1472	263.1	23.85
1473	263.2	6.82
1474	263.3	0
1475	263.5	0
1476	263.6	8.8
1477	263.7	28.67
1478	263.8	40.73
1479	263.9	44.09
1480	264	36.02
1481	264.1	22.25
1482	264.2	10.25
1483	264.3	1.18
1484	264.4	0
1485	265	0
1486	265.1	14.38
1487	265.2	25.33
1488	265.3	19.14
1489	265.4	6.43
1490	265.5	0.07
1491	265.6	0.29
1492	265.7	0
1493	267	0
1494	267.1	0.62
1495	267.2	6.44
1496	267.3	6.09
1497	267.4	0
1498	267.7	0
1499	267.8	2.27
1500	267.9	11.18
1501	268	10.49
1502	268.1	4.03
1503	268.2	0.88
1504	268.3	2.07
1505	268.4	1.05
1506	268.5	0
1507	268.9	0
1508	269	1.17
1509	269.1	11.69
1510	269.2	17.14
1511	269.3	12.87
1512	269.4	0.17
1513	269.5	0
1514	269.7	0
1515	269.8	2.51
1516	269.9	2.84
1517	270	1.03
1518	270.1	0
1519	270.4	0
1520	270.5	4.81
1521	270.6	38.53
1522	270.7	90.06
1523	270.8	128.05
1524	270.9	129.68
1525	271	105.86
1526	271.1	81.6
1527	271.2	62.58
1528	271.3	45.74
1529	271.4	29.5
1530	271.5	20.23
1531	271.6	19.44
1532	271.7	21.4
1533	271.8	13.74
1534	271.9	0
1535	272	0
1536	272.1	2.78
1537	272.2	11.83
1538	272.3	12.29
1539	272.4	8.86
1540	272.5	8.23
1541	272.6	12.32
1542	272.7	10.93
1543	272.8	0
1544	273.9	0
1545	274	30.56
1546	274.1	50.33
1547	274.2	50
1548	274.3	45.67
1549	274.4	38.67
1550	274.5	29.44
1551	274.6	25.96
1552	274.7	30.02
1553	274.8	27.62
1554	274.9	12.22
1555	275	0
1556	275.6	0
1557	275.7	8.16
1558	275.8	41.03
1559	275.9	80.37
1560	276	104.92
1561	276.1	97.08
1562	276.2	60.25
1563	276.3	18.94
1564	276.4	0
1565	276.7	0
1566	276.8	8.1
1567	276.9	13.26
1568	277	15.82
1569	277.1	18.84
1570	277.2	18.07
1571	277.3	9.83
1572	277.4	0.26
1573	277.5	0
1574	278.1	0
1575	278.2	16.22
1576	278.3	29.63
1577	278.4	35.08
1578	278.5	36.43
1579	278.6	49.07
1580	278.7	51.57
1581	278.8	32.77
1582	278.9	13.83
1583	279	12.18
1584	279.1	10.83
1585	279.2	0
1586	279.5	0
1587	279.6	1.7
1588	279.7	8.41
1589	279.8	20.19
1590	279.9	33.47
1591	280	36.96
1592	280.1	25.29
1593	280.2	18.93
1594	280.3	101.66
1595	280.4	303.64
1596	280.5	552.93
1597	280.6	760.29
1598	280.7	937.62
1599	280.8	1119.04
1600	280.9	1267.8
1601	281	1310.89
1602	281.1	1219.82
1603	281.2	1025.26
1604	281.3	779.99
1605	281.4	543.43
1606	281.5	328.28
1607	281.6	165.47
1608	281.7	129.7
1609	281.8	173.7
1610	281.9	226.81
1611	282	249.13
1612	282.1	233.6
1613	282.2	173.13
1614	282.3	78.95
1615	282.4	12.57
1616	282.5	0
1617	282.9	0
1618	283	18.46
1619	283.1	62.37
1620	283.2	49.66
1621	283.3	7.45
1622	283.4	0
1623	285.4	0
1624	285.5	7.58
1625	285.6	40.05
1626	285.7	84.45
1627	285.8	136.11
1628	285.9	178.94
1629	286	207.73
1630	286.1	231.19
1631	286.2	244.37
1632	286.3	228.26
1633	286.4	175.58
1634	286.5	106.15
1635	286.6	56.18
1636	286.7	31.26
1637	286.8	37.12
1638	286.9	43.04
1639	287	38.73
1640	287.1	35.63
1641	287.2	36.68
1642	287.3	35.41
1643	287.4	23.93
1644	287.5	8.5
1645	287.6	1.72
1646	287.7	6.11
1647	287.8	18.2
1648	287.9	34.74
1649	288	51.35
1650	288.1	59.36
1651	288.2	51.06
1652	288.3	20.65
1653	288.4	0
1654	288.7	0
1655	288.8	15.91
1656	288.9	20.72
1657	289	17.16
1658	289.1	9.16
1659	289.2	3.22
1660	289.3	0.34
1661	289.4	0
1662	289.7	0
1663	289.8	5.81
1664	289.9	12.1
1665	290	13.39
1666	290.1	4.91
1667	290.2	0
1668	290.7	0
1669	290.8	7.64
1670	290.9	19.32
1671	291	18.62
1672	291.1	3.31
1673	291.2	0
1674	292.1	0
1675	292.2	2.55
1676	292.3	9.23
1677	292.4	12.94
1678	292.5	12.99
1679	292.6	12.76
1680	292.7	16.74
1681	292.8	22.36
1682	292.9	22.56
1683	293	16.57
1684	293.1	10.31
1685	293.2	6.44
1686	293.3	2.78
1687	293.4	0
1688	294.2	0
1689	294.3	27.83
1690	294.4	71.63
1691	294.5	138.44
1692	294.6	238.49
1693	294.7	323.49
1694	294.8	378.74
1695	294.9	452.94
1696	295	588.57
1697	295.1	704.33
1698	295.2	656.07
1699	295.3	421.2
1700	295.4	153.29
1701	295.5	0
1702	295.7	0
1703	295.8	30.24
1704	295.9	61.85
1705	296	82.6
1706	296.1	72.77
1707	296.2	65.29
1708	296.3	51.7
1709	296.4	149.16
1710	296.5	298.15
1711	296.6	174.49
1712	296.7	0
1713	297	0
1714	297.1	52.82
1715	297.2	97.71
1716	297.3	36.56
1717	297.4	12.19
1718	297.5	0
1719	297.6	0
1720	297.7	9.71
1721	297.8	219.86
1722	297.9	437.4
1723	298	421.64
1724	298.1	164.51
1725	298.2	0
1726	298.4	0
1727	298.5	35.73
1728	298.6	10.39
1729	298.7	38.68
1730	298.8	150.08
1731	298.9	282.53
1732	299	342.91
1733	299.1	318.75
1734	299.2	251.49
1735	299.3	166.41
1736	299.4	40.86
1737	299.5	0
1738	299.6	0
1739	299.7	36.58
1740	299.8	114.76
1741	299.9	150.27
1742	300	178.7
1743	300.1	215.04
1744	300.2	190.84
1745	300.3	88.72
1746	300.4	0
1747	301	0
1748	301.1	16.35
1749	301.2	33.15
1750	301.3	15.35
1751	301.4	0
1752	301.5	6.96
1753	301.6	50.66
1754	301.7	158.57
1755	301.8	361.17
1756	301.9	616.85
1757	302	803.88
1758	302.1	853.32
1759	302.2	813.27
1760	302.3	744.23
1761	302.4	618.46
1762	302.5	400.33
1763	302.6	158.49
1764	302.7	28.42
1765	302.8	42.38
1766	302.9	57.98
1767	303	64.78
1768	303.1	61.8
1769	303.2	55.58
1770	303.3	53.3
1771	303.4	43.86
1772	303.5	21.78
1773	303.6	0
1774	304.3	0
1775	304.4	2.38
1776	304.5	5.45
1777	304.6	8.1
1778	304.7	8.8
1779	304.8	6.68
1780	304.9	2.96
1781	305	0
1782	305.1	0
1783	305.2	0
1784	305.3	0.18
1785	305.4	2.18
1786	305.5	4.28
1787	305.6	4.6
1788	305.7	2.69
1789	305.8	0.79
1790	305.9	1.51
1791	306	4.55
1792	306.1	6.58
1793	306.2	5.53
1794	306.3	2.85
1795	306.4	3.99
1796	306.5	20.71
1797	306.6	38.12
1798	306.7	26.77
1799	306.8	0
1800	307.1	0
1801	307.2	3.81
1802	307.3	3.57
1803	307.4	1.71
1804	307.5	0.54
1805	307.6	0.35
1806	307.7	0
1807	307.9	0
1808	308	0.95
1809	308.1	2.47
1810	308.2	4.74
1811	308.3	7.41
1812	308.4	9.71
1813	308.5	11.59
1814	308.6	12.28
1815	308.7	9.49
1816	308.8	3.08
1817	308.9	0
1818	309.2	0
1819	309.3	0.26
1820	309.4	1.3
1821	309.5	2.47
1822	309.6	3.41
1823	309.7	4.2
1824	309.8	5.33
1825	309.9	6.49
1826	310	6.83
1827	310.1	6.86
1828	310.2	8.36
1829	310.3	10.25
1830	310.4	8.03
1831	310.5	1.09
1832	310.6	0
1833	310.7	0
1834	310.8	2.34
1835	310.9	2.56
1836	311	6.34
1837	311.1	17.95
1838	311.2	29.57
1839	311.3	30.19
1840	311.4	21.68
1841	311.5	15.33
1842	311.6	16.2
1843	311.7	16.06
1844	311.8	12.57
1845	311.9	5.57
1846	312	0
1847	312.8	0
1848	312.9	3.68
1849	313	7.73
1850	313.1	8.67
1851	313.2	8.42
1852	313.3	8.87
1853	313.4	8.42
1854	313.5	6.1
1855	313.6	5.94
1856	313.7	11.05
1857	313.8	16.68
1858	313.9	15.12
1859	314	6.27
1860	314.1	0
1861	314.3	0
1862	314.4	1.79
1863	314.5	5.07
1864	314.6	6.69
1865	314.7	4.37
1866	314.8	0
1867	316.4	0
1868	316.5	8.46
1869	316.6	12.64
1870	316.7	9.23
1871	316.8	0
1872	317.2	0
1873	317.3	9.61
1874	317.4	26.32
1875	317.5	44.46
1876	317.6	49.05
1877	317.7	43.12
1878	317.8	60.03
1879	317.9	154.42
1880	318	300.7
1881	318.1	439.55
1882	318.2	525.09
1883	318.3	528.3
1884	318.4	432.58
1885	318.5	259.39
1886	318.6	98.95
1887	318.7	27.05
1888	318.8	24.64
1889	318.9	44.99
1890	319	48.25
1891	319.1	34.83
1892	319.2	30.9
1893	319.3	47.92
1894	319.4	67.92
1895	319.5	64.35
1896	319.6	45.04
1897	319.7	23
1898	319.8	8.99
1899	319.9	7.16
1900	320	9.92
1901	320.1	12.02
1902	320.2	10.19
1903	320.3	5.49
1904	320.4	1.33
1905	320.5	0
1906	320.6	0.47
1907	320.7	2.84
1908	320.8	4.98
1909	320.9	3.76
1910	321	0
1911	321.7	0
1912	321.8	0.39
1913	321.9	0.44
1914	322	0.03
1915	322.1	0
1916	322.2	0.02
1917	322.3	0
1918	322.5	0
1919	322.6	3.4
1920	322.7	8.41
1921	322.8	10.25
1922	322.9	1.33
1923	323	0
1924	323.3	0
1925	323.4	0.04
1926	323.5	4.46
1927	323.6	2.99
1928	323.7	0.5
1929	323.8	0
1930	324	0
1931	324.1	1.03
1932	324.2	2.2
1933	324.3	3.7
1934	324.4	5.01
1935	324.5	3.94
1936	324.6	0
1937	325.4	0
1938	325.5	0.3
1939	325.6	1.51
1940	325.7	1.68
1941	325.8	0
1942	326.7	0
1943	326.8	14.89
1944	326.9	33.21
1945	327	33.57
1946	327.1	11.59
1947	327.2	0
1948	327.7	0
1949	327.8	1.37
1950	327.9	4.43
1951	328	6.44
1952	328.1	15.58
1953	328.2	27.64
1954	328.3	30.31
1955	328.4	19.64
1956	328.5	7.02
1957	328.6	4.2
1958	328.7	8.02
1959	328.8	11.41
1960	328.9	10.96
1961	329	9.68
1962	329.1	9.95
1963	329.2	10.49
1964	329.3	9.05
1965	329.4	5.7
1966	329.5	0.54
1967	329.6	0
1968	329.9	0
1969	330	3.07
1970	330.1	19.2
1971	330.2	30.1
1972	330.3	31.35
1973	330.4	37.45
1974	330.5	63.93
1975	330.6	85.4
1976	330.7	67.96
1977	330.8	5.43
1978	330.9	0
1979	331.2	0
1980	331.3	6.15
1981	331.4	5.98
1982	331.5	6
1983	331.6	8.45
1984	331.7	13.81
1985	331.8	21.83
1986	331.9	31.41
1987	332	37.96
1988	332.1	37.88
1989	332.2	32.14
1990	332.3	23.26
1991	332.4	12.77
1992	332.5	0.56
1993	332.6	0
1994	332.8	0
1995	332.9	7.67
1996	333	12.46
1997	333.1	10.06
[truncated: 2,144 more rows]

[truncated: 12 more sheets: Sheet11, Sheet12, Sheet13, Sheet14, Sheet15, Sheet16, Sheet17, Sheet18, Sheet19, Sheet20, Sheet21, Sheet22]
