# Supplementary material for: Electron transfer engineering of artificially designed cell factory for complete biosynthesis of natural products
Source: Research Square preprint supplement (doi:10.21203/rs.3.rs-4718218/v1), 2024-08-01
Supplement: Supplementary file 4 [file MSdata_4608-02.XLS.xls]

## Sheet: Sheet1
+ESI Scan (rt: 0.65-1.07 min, 93 scans) Frag=100.0V CF=0.000 DF=0.000 4608-02.d Subtract
Index	X	Y
0	50	0.31
1	50.1	0.08
2	50.2	0
3	50.3	0
4	50.4	0.21
5	50.5	0.39
6	50.6	0.34
7	50.7	0.17
8	50.8	0.01
9	50.9	0
10	51.2	0
11	51.3	0.01
12	51.4	0.35
13	51.5	0.6
14	51.6	0.63
15	51.7	0.36
16	51.8	0
17	51.9	0
18	52	0.26
19	52.1	0.51
20	52.2	0.3
21	52.3	0
22	52.4	0
23	52.5	0.3
24	52.6	0.52
25	52.7	0.45
26	52.8	0.35
27	52.9	0.44
28	53	0.28
29	53.1	0
30	53.5	0
31	53.6	0.87
32	53.7	1.06
33	53.8	0.42
34	53.9	0
35	54.3	0
36	54.4	4.7
37	54.5	14.29
38	54.6	17.66
39	54.7	13.92
40	54.8	14.49
41	54.9	8.37
42	55	0
43	55.6	0
44	55.7	1.39
45	55.8	8.17
46	55.9	12.87
47	56	9.73
48	56.1	2.64
49	56.2	0
50	56.3	0.88
51	56.4	7.16
52	56.5	4.91
53	56.6	0
54	56.7	0
55	56.8	35.57
56	56.9	98.77
57	57	53.42
58	57.1	0
59	57.4	0
60	57.5	43.17
61	57.6	24.14
62	57.7	0
63	57.9	0
64	58	12.38
65	58.1	24.76
66	58.2	35.31
67	58.3	45.33
68	58.4	57.99
69	58.5	52.17
70	58.6	0
71	59.9	0
72	60	46.09
73	60.1	81.3
74	60.2	40.96
75	60.3	0
76	60.5	0
77	60.6	2.74
78	60.7	0
79	61.3	0
80	61.4	44.52
81	61.5	78.71
82	61.6	65.16
83	61.7	14.55
84	61.8	5.77
85	61.9	16.91
86	62	24.35
87	62.1	41.95
88	62.2	23.4
89	62.3	0
90	63	0
91	63.1	2.33
92	63.2	2.21
93	63.3	1.13
94	63.4	1.51
95	63.5	5.79
96	63.6	24.31
97	63.7	64.3
98	63.8	112.12
99	63.9	147.02
100	64	158.61
101	64.1	151.95
102	64.2	130.86
103	64.3	94.81
104	64.4	49.59
105	64.5	15.54
106	64.6	3.82
107	64.7	9.91
108	64.8	22.42
109	64.9	35.66
110	65	42.6
111	65.1	41.02
112	65.2	34.46
113	65.3	27.73
114	65.4	21.49
115	65.5	12.26
116	65.6	3.62
117	65.7	0.92
118	65.8	1.74
119	65.9	2.33
120	66	2.37
121	66.1	1.44
122	66.2	0.33
123	66.3	0
124	66.4	0
125	66.5	0.1
126	66.6	0.63
127	66.7	0.25
128	66.8	0
129	66.9	1.54
130	67	7.42
131	67.1	14.03
132	67.2	15.84
133	67.3	11.27
134	67.4	4.51
135	67.5	0.36
136	67.6	0
137	67.7	0.12
138	67.8	0.09
139	67.9	0
140	68.3	0
141	68.4	3.24
142	68.5	16.69
143	68.6	39.66
144	68.7	62.71
145	68.8	58.19
146	68.9	28.57
147	69	0
148	69.2	0
149	69.3	13.64
150	69.4	27.27
151	69.5	34.01
152	69.6	32.07
153	69.7	28.68
154	69.8	24.05
155	69.9	19.31
156	70	20.84
157	70.1	32.48
158	70.2	41.5
159	70.3	27.99
160	70.4	1.32
161	70.5	0
162	70.6	0
163	70.7	9.7
164	70.8	13.59
165	70.9	0
166	71.6	0
167	71.7	25.98
168	71.8	12.31
169	71.9	12.88
170	72	29
171	72.1	34.43
172	72.2	14.66
173	72.3	0
174	73.6	0
175	73.7	64.27
176	73.8	42.06
177	73.9	6.33
178	74	0
179	74.3	0
180	74.4	91.03
181	74.5	147.67
182	74.6	121.02
183	74.7	92.67
184	74.8	70.35
185	74.9	29.15
186	75	0
187	75.3	0
188	75.4	48.31
189	75.5	57.98
190	75.6	21.24
191	75.7	0
192	76.1	0
193	76.2	6.16
194	76.3	27.37
195	76.4	29.48
196	76.5	17.72
197	76.6	9.75
198	76.7	28.29
199	76.8	66.57
200	76.9	101.53
201	77	128.67
202	77.1	155.18
203	77.2	167.42
204	77.3	134.84
205	77.4	57.25
206	77.5	0
207	77.6	0
208	77.7	8.58
209	77.8	19.19
210	77.9	0
211	78.2	0
212	78.3	74.49
213	78.4	189.48
214	78.5	190.37
215	78.6	241.79
216	78.7	509.22
217	78.8	939.94
218	78.9	1405.71
219	79	1723.29
220	79.1	1818.83
221	79.2	1710.08
222	79.3	1430.95
223	79.4	1020.21
224	79.5	565.57
225	79.6	208.62
226	79.7	42.91
227	79.8	10.67
228	79.9	11.73
229	80	33.45
230	80.1	69.01
231	80.2	105.87
232	80.3	127.93
233	80.4	124.71
234	80.5	136.37
235	80.6	241.92
236	80.7	434.46
237	80.8	620.65
238	80.9	704.99
239	81	714.01
240	81.1	743.17
241	81.2	808.32
242	81.3	817.52
243	81.4	688.59
244	81.5	444.6
245	81.6	200.19
246	81.7	62.13
247	81.8	31.71
248	81.9	51.56
249	82	79.97
250	82.1	108.53
251	82.2	141.27
252	82.3	161.13
253	82.4	142.39
254	82.5	93.07
255	82.6	40.43
256	82.7	2.37
257	82.8	0
258	82.9	0
259	83	36.13
260	83.1	103.57
261	83.2	137.3
262	83.3	111
263	83.4	55.67
264	83.5	26.26
265	83.6	19.16
266	83.7	5.84
267	83.8	0
268	84.7	0
269	84.8	27.46
270	84.9	61.59
271	85	82.3
272	85.1	86.43
273	85.2	75.8
274	85.3	54.84
275	85.4	30.81
276	85.5	16.31
277	85.6	10.56
278	85.7	5.35
279	85.8	0
280	86	0
281	86.1	9.17
282	86.2	17.61
283	86.3	15.81
284	86.4	12.63
285	86.5	2.36
286	86.6	0
287	86.9	0
288	87	18.22
289	87.1	19.39
290	87.2	0
291	87.3	0
292	87.4	39.66
293	87.5	102.26
294	87.6	102.45
295	87.7	60.4
296	87.8	22.81
297	87.9	27.85
298	88	75.57
299	88.1	140.98
300	88.2	174.4
301	88.3	168.83
302	88.4	104.11
303	88.5	206.07
304	88.6	325.69
305	88.7	186.86
306	88.8	0
307	89.7	0
308	89.8	24.04
309	89.9	239.4
310	90	393.71
311	90.1	313.81
312	90.2	180.65
313	90.3	125.62
314	90.4	146.66
315	90.5	166.05
316	90.6	178.09
317	90.7	247.45
318	90.8	331.04
319	90.9	372.03
320	91	360.4
321	91.1	323.16
322	91.2	255.63
323	91.3	154.38
324	91.4	69.45
325	91.5	36.45
326	91.6	26.33
327	91.7	16.24
328	91.8	29.04
329	91.9	44.03
330	92	50.12
331	92.1	46.38
332	92.2	37.25
333	92.3	24.65
334	92.4	9.56
335	92.5	3.04
336	92.6	9.84
337	92.7	31.97
338	92.8	56.19
339	92.9	64.19
340	93	36.66
341	93.1	0
342	93.4	0
343	93.5	11.44
344	93.6	16.83
345	93.7	12.31
346	93.8	7.37
347	93.9	5.22
348	94	3.77
349	94.1	1.19
350	94.2	0
351	94.3	1
352	94.4	3.67
353	94.5	5.07
354	94.6	6.08
355	94.7	9.67
356	94.8	19.8
357	94.9	36.39
358	95	65.51
359	95.1	99.1
360	95.2	115.36
361	95.3	100.27
362	95.4	66.36
363	95.5	43.67
364	95.6	42.98
365	95.7	67.56
366	95.8	104.24
367	95.9	132.4
368	96	128.12
369	96.1	105.29
370	96.2	93.17
371	96.3	92.69
372	96.4	82.13
373	96.5	56.05
374	96.6	23.71
375	96.7	0
376	96.9	0
377	97	7.55
378	97.1	62.92
379	97.2	76.48
380	97.3	49.62
381	97.4	32.67
382	97.5	58.69
383	97.6	147.8
384	97.7	274.24
385	97.8	378.97
386	97.9	401.33
387	98	381.34
388	98.1	377.18
389	98.2	395.14
390	98.3	394.54
391	98.4	442.51
392	98.5	770.22
393	98.6	1594.25
394	98.7	2853.31
395	98.8	4084.58
396	98.9	4782.95
397	99	4882.93
398	99.1	4674.49
399	99.2	4276.59
400	99.3	3510.17
401	99.4	2337.3
402	99.5	1115.49
403	99.6	310.73
404	99.7	22.32
405	99.8	9.23
406	99.9	31.37
407	100	37.76
408	100.1	85.16
409	100.2	198.35
410	100.3	418.37
411	100.4	799.57
412	100.5	1528.25
413	100.6	2902.12
414	100.7	5043.94
415	100.8	7520.4
416	100.9	9395.79
417	101	10035.3
418	101.1	9624.12
419	101.2	8618.38
420	101.3	7044.85
421	101.4	4813.05
422	101.5	2401.96
423	101.6	596.56
424	101.7	0
425	102.6	0
426	102.7	229.33
427	102.8	542
428	102.9	644.15
429	103	581.88
430	103.1	471.6
431	103.2	410.23
432	103.3	399.76
433	103.4	356.36
434	103.5	236.44
435	103.6	115.95
436	103.7	65.56
437	103.8	82.16
438	103.9	86.46
439	104	66.78
440	104.1	42.92
441	104.2	28.33
442	104.3	13.08
443	104.4	0
444	104.5	0
445	104.6	30.2
446	104.7	81.17
447	104.8	127.44
448	104.9	140.15
449	105	120.26
450	105.1	96.67
451	105.2	79.65
452	105.3	52.7
453	105.4	21.42
454	105.5	45.88
455	105.6	150.83
456	105.7	324.82
457	105.8	474.92
458	105.9	540.37
459	106	519.19
460	106.1	460.84
461	106.2	400.71
462	106.3	326.48
463	106.4	236.29
464	106.5	191.39
465	106.6	239.05
466	106.7	340.37
467	106.8	350.1
468	106.9	189.45
469	107	0
470	107.5	0
471	107.6	35.5
472	107.7	74.56
473	107.8	138.83
474	107.9	155.61
475	108	108.76
476	108.1	45.85
477	108.2	19.23
478	108.3	32.99
479	108.4	62.27
480	108.5	81.15
481	108.6	80.19
482	108.7	76.39
483	108.8	80.84
484	108.9	79.37
485	109	42.93
486	109.1	0
487	109.3	0
488	109.4	2.36
489	109.5	32.6
490	109.6	42.92
491	109.7	49.86
492	109.8	55.34
493	109.9	57.36
494	110	56.33
495	110.1	49.16
496	110.2	44.95
497	110.3	56.07
498	110.4	98.35
499	110.5	137.32
500	110.6	165.5
501	110.7	224.3
502	110.8	312.9
503	110.9	393.09
504	111	431.05
505	111.1	441.52
506	111.2	443.41
507	111.3	407.48
508	111.4	306.34
509	111.5	163.96
510	111.6	41.89
511	111.7	15.9
512	111.8	49.51
513	111.9	126.26
514	112	201.53
515	112.1	225.18
516	112.2	190.38
517	112.3	132.48
518	112.4	85.3
519	112.5	63.67
520	112.6	72.08
521	112.7	107.2
522	112.8	152.61
523	112.9	158.42
524	113	102.89
525	113.1	14.92
526	113.2	0
527	113.7	0
528	113.8	5.11
529	113.9	35.79
530	114	23.97
531	114.1	0
532	114.6	0
533	114.7	25.17
534	114.8	223.18
535	114.9	323.14
536	115	259.88
537	115.1	191.46
538	115.2	242.64
539	115.3	321.25
540	115.4	304.26
541	115.5	235.55
542	115.6	215.48
543	115.7	268.97
544	115.8	335.09
545	115.9	362.73
546	116	343.89
547	116.1	296.61
548	116.2	229.91
549	116.3	163.75
550	116.4	122.58
551	116.5	106.66
552	116.6	71.5
553	116.7	0
554	117.1	0
555	117.2	139.28
556	117.3	223.65
557	117.4	171.53
558	117.5	77.75
559	117.6	39.97
560	117.7	75.51
561	117.8	147.34
562	117.9	209.43
563	118	233.74
564	118.1	227.6
565	118.2	204.84
566	118.3	165.04
567	118.4	118.81
568	118.5	64.55
569	118.6	0
570	119.6	0
571	119.7	8.65
572	119.8	61.38
573	119.9	94.66
574	120	107.23
575	120.1	114.42
576	120.2	130.73
577	120.3	202.39
578	120.4	392.13
579	120.5	684.51
580	120.6	989.79
581	120.7	1190.87
582	120.8	1198.9
583	120.9	1053.78
584	121	899.74
585	121.1	832.06
586	121.2	800.85
587	121.3	685.14
588	121.4	443.53
589	121.5	170.03
590	121.6	28.64
591	121.7	26.97
592	121.8	56.11
593	121.9	21.93
594	122	0
595	122.4	0
596	122.5	69.92
597	122.6	96.3
598	122.7	86.79
599	122.8	63.31
600	122.9	39.35
601	123	39.73
602	123.1	67.2
603	123.2	103.83
604	123.3	123.28
605	123.4	132.72
606	123.5	142.86
607	123.6	170.82
608	123.7	228.64
609	123.8	305.01
610	123.9	370.51
611	124	400.63
612	124.1	379.76
613	124.2	319.71
614	124.3	235.79
615	124.4	146.54
616	124.5	65.75
617	124.6	20.1
618	124.7	32.18
619	124.8	86.55
620	124.9	154.56
621	125	203.76
622	125.1	203.24
623	125.2	143.63
624	125.3	45.01
625	125.4	0
626	125.6	0
627	125.7	41.62
628	125.8	75.4
629	125.9	86.97
630	126	85.37
631	126.1	78.47
632	126.2	78.91
633	126.3	100.93
634	126.4	152.1
635	126.5	211.97
636	126.6	266.35
637	126.7	357.24
638	126.8	510.14
639	126.9	669.67
640	127	740.4
641	127.1	675.23
642	127.2	512.69
643	127.3	319.34
644	127.4	157.58
645	127.5	69.44
646	127.6	43.02
647	127.7	73.85
648	127.8	109.77
649	127.9	127.96
650	128	125.72
651	128.1	96.98
652	128.2	50.05
653	128.3	17.46
654	128.4	16.87
655	128.5	61.17
656	128.6	125.47
657	128.7	128.99
658	128.8	56.5
659	128.9	1.36
660	129	49.67
661	129.1	178.08
662	129.2	281.47
663	129.3	281.24
664	129.4	191.68
665	129.5	96.48
666	129.6	78.92
667	129.7	108.73
668	129.8	120.63
669	129.9	105.37
670	130	87.6
671	130.1	84.18
672	130.2	87.16
673	130.3	82.09
674	130.4	103.94
675	130.5	158.99
676	130.6	186.37
677	130.7	160.94
678	130.8	127.5
679	130.9	135.83
680	131	184.34
681	131.1	228.17
682	131.2	229.34
683	131.3	186.18
684	131.4	128
685	131.5	86.18
686	131.6	72.88
687	131.7	60.29
688	131.8	74.32
689	131.9	99.94
690	132	104.78
691	132.1	77.85
692	132.2	50.06
693	132.3	25.09
694	132.4	0
695	132.7	0
696	132.8	23.97
697	132.9	144.67
698	133	247.86
699	133.1	280.99
700	133.2	220.69
701	133.3	113.69
702	133.4	44
703	133.5	50.92
704	133.6	100.19
705	133.7	125.7
706	133.8	97.75
707	133.9	50.01
708	134	23.9
709	134.1	32.6
710	134.2	53.27
711	134.3	50.15
712	134.4	41.25
713	134.5	30.92
714	134.6	26.91
715	134.7	49
716	134.8	96.14
717	134.9	137.72
718	135	137.14
719	135.1	96.64
720	135.2	53.72
721	135.3	29.26
722	135.4	19.84
723	135.5	14.53
724	135.6	6.34
725	135.7	0
726	135.9	0
727	136	16.27
728	136.1	35.45
729	136.2	26.89
730	136.3	6.12
731	136.4	0
732	136.6	0
733	136.7	47.79
734	136.8	148.49
735	136.9	300.95
736	137	397.83
737	137.1	302.07
738	137.2	63.99
739	137.3	0
740	137.4	0
741	137.5	102.15
742	137.6	107.13
743	137.7	77.59
744	137.8	72.02
745	137.9	101.28
746	138	124.45
747	138.1	90.86
748	138.2	33.68
749	138.3	10.6
750	138.4	42.99
751	138.5	91.31
752	138.6	126.87
753	138.7	155.75
754	138.8	196.38
755	138.9	236.34
756	139	247.18
757	139.1	245.36
758	139.2	258.35
759	139.3	262.36
760	139.4	208.57
761	139.5	118.43
762	139.6	75.35
763	139.7	107.68
764	139.8	168.19
765	139.9	198.62
766	140	178.77
767	140.1	125.72
768	140.2	63.19
769	140.3	24.9
770	140.4	35.36
771	140.5	110.41
772	140.6	221.5
773	140.7	301.62
774	140.8	316.11
775	140.9	298.56
776	141	262.13
777	141.1	200.38
778	141.2	116.12
779	141.3	51.92
780	141.4	66.11
781	141.5	181.99
782	141.6	378.54
783	141.7	583.72
784	141.8	714.18
785	141.9	746.55
786	142	727.36
787	142.1	692.06
788	142.2	637.42
789	142.3	581.15
790	142.4	575.54
791	142.5	630.19
792	142.6	690.17
793	142.7	778.07
794	142.8	935.17
795	142.9	1096.53
796	143	1101.78
797	143.1	911.94
798	143.2	645.1
799	143.3	417.07
800	143.4	263.68
801	143.5	182.91
802	143.6	180.53
803	143.7	244.13
804	143.8	300.35
805	143.9	278.26
806	144	201.63
807	144.1	157.41
808	144.2	186.75
809	144.3	227.48
810	144.4	164.53
811	144.5	0
812	145.3	0
813	145.4	100.78
814	145.5	199.59
815	145.6	161.08
816	145.7	88.61
817	145.8	50.48
818	145.9	41.18
819	146	61.03
820	146.1	70.29
821	146.2	45.6
822	146.3	0
823	147.1	0
824	147.2	14
825	147.3	42.07
826	147.4	55.36
827	147.5	63.85
828	147.6	66.18
829	147.7	96.18
830	147.8	134.65
831	147.9	148.4
832	148	120.73
833	148.1	76.07
834	148.2	55.41
835	148.3	44.48
836	148.4	16.96
837	148.5	0
838	149	0
839	149.1	96.48
840	149.2	142.62
841	149.3	107.42
842	149.4	59.34
843	149.5	60.02
844	149.6	100.48
845	149.7	155.9
846	149.8	204.17
847	149.9	218.21
848	150	184.43
849	150.1	116.97
850	150.2	54.24
851	150.3	27.9
852	150.4	25.54
853	150.5	21.27
854	150.6	21.39
855	150.7	42.55
856	150.8	101.26
857	150.9	176.39
858	151	223.08
859	151.1	213.06
860	151.2	147.59
861	151.3	61.32
862	151.4	2.08
863	151.5	0
864	151.6	41.09
865	151.7	87.82
866	151.8	112.35
867	151.9	124.31
868	152	134.26
869	152.1	124.81
870	152.2	82.96
871	152.3	45.78
872	152.4	13.96
873	152.5	0
874	152.6	3.8
875	152.7	61.16
876	152.8	157.5
877	152.9	260.71
878	153	292.02
879	153.1	173.49
880	153.2	0
881	153.4	0
882	153.5	24.57
883	153.6	128.28
884	153.7	105.38
885	153.8	66.92
886	153.9	54.16
887	154	41.03
888	154.1	14.49
889	154.2	1.49
890	154.3	25.96
891	154.4	58.29
892	154.5	63.32
893	154.6	40.06
894	154.7	35.53
895	154.8	56.13
896	154.9	68.9
897	155	48.55
898	155.1	30.37
899	155.2	44.78
900	155.3	66.75
901	155.4	80.65
902	155.5	98.87
903	155.6	137.55
904	155.7	177.32
905	155.8	203.57
906	155.9	204.12
907	156	176.83
908	156.1	136.07
909	156.2	119.27
910	156.3	133.68
911	156.4	154.84
912	156.5	166.6
913	156.6	216.89
914	156.7	380.02
915	156.8	635.01
916	156.9	834.77
917	157	853.89
918	157.1	716.67
919	157.2	531.86
920	157.3	360.9
921	157.4	215.91
922	157.5	115.47
923	157.6	69.03
924	157.7	46.98
925	157.8	22.41
926	157.9	0
927	158	0
928	158.1	1.92
929	158.2	47.53
930	158.3	77.46
931	158.4	92.88
932	158.5	119.48
933	158.6	189.26
934	158.7	299.66
935	158.8	414.17
936	158.9	480.7
937	159	461.76
938	159.1	372.94
939	159.2	271.27
940	159.3	190.08
941	159.4	132.72
942	159.5	77.7
943	159.6	39.85
944	159.7	26.21
945	159.8	23.24
946	159.9	23.05
947	160	31.05
948	160.1	43.39
949	160.2	48.89
950	160.3	28.49
951	160.4	0
952	161	0
953	161.1	57.73
954	161.2	110.6
955	161.3	85.43
956	161.4	9.22
957	161.5	0
958	161.7	0
959	161.8	22.83
960	161.9	49.33
961	162	63.1
962	162.1	60.17
963	162.2	62.52
964	162.3	84
965	162.4	121.58
966	162.5	147.58
967	162.6	143.93
968	162.7	114.44
969	162.8	65.6
970	162.9	18.14
971	163	0
972	163.1	0
973	163.2	3.99
974	163.3	12.71
975	163.4	32.48
976	163.5	57.97
977	163.6	74.31
978	163.7	86.06
979	163.8	104.27
980	163.9	118.41
981	164	108.47
982	164.1	81.49
983	164.2	68.6
984	164.3	84.26
985	164.4	100.88
986	164.5	83.41
987	164.6	44.68
988	164.7	34.21
989	164.8	70.57
990	164.9	116.04
991	165	129.44
992	165.1	117.25
993	165.2	93.84
994	165.3	65.76
995	165.4	32.08
996	165.5	7.72
997	165.6	10.35
998	165.7	28.19
999	165.8	48.45
1000	165.9	56.88
1001	166	48.48
1002	166.1	34.01
1003	166.2	29.36
1004	166.3	32.17
1005	166.4	29.96
1006	166.5	21.18
1007	166.6	7.01
1008	166.7	0
1009	166.8	0
1010	166.9	2.91
1011	167	22.51
1012	167.1	25.49
1013	167.2	14.18
1014	167.3	13.69
1015	167.4	24.32
1016	167.5	27.06
1017	167.6	22.39
1018	167.7	20.47
1019	167.8	27.29
1020	167.9	36.46
1021	168	38.4
1022	168.1	31.04
1023	168.2	26.52
1024	168.3	34.55
1025	168.4	46.67
1026	168.5	41.97
1027	168.6	19.25
1028	168.7	0
1029	168.8	0.61
1030	168.9	19.05
1031	169	34.32
1032	169.1	38.62
1033	169.2	37.06
1034	169.3	34.26
1035	169.4	34.28
1036	169.5	42.51
1037	169.6	57.97
1038	169.7	62.94
1039	169.8	42.73
1040	169.9	12.53
1041	170	7.34
1042	170.1	41.47
1043	170.2	95.77
1044	170.3	164
1045	170.4	245.98
1046	170.5	370.61
1047	170.6	535.34
1048	170.7	709.72
1049	170.8	851.14
1050	170.9	943.57
1051	171	1002.62
1052	171.1	1005.7
1053	171.2	883.6
1054	171.3	609.7
1055	171.4	284.65
1056	171.5	59.36
1057	171.6	0
1058	172	0
1059	172.1	6.36
1060	172.2	17.45
1061	172.3	34.7
1062	172.4	45.84
1063	172.5	38.85
1064	172.6	22.24
1065	172.7	1.13
1066	172.8	0
1067	173	0
1068	173.1	40.91
1069	173.2	73.54
1070	173.3	68.83
1071	173.4	38.2
1072	173.5	14.35
1073	173.6	17.92
1074	173.7	55.88
1075	173.8	104.42
1076	173.9	135.56
1077	174	140.35
1078	174.1	118.88
1079	174.2	72.42
1080	174.3	0
1081	174.9	0
1082	175	87.76
1083	175.1	118.66
1084	175.2	99.22
1085	175.3	87.07
1086	175.4	89.16
1087	175.5	63.71
1088	175.6	17.67
1089	175.7	5.47
1090	175.8	35.71
1091	175.9	88.73
1092	176	127.53
1093	176.1	129.86
1094	176.2	94.67
1095	176.3	12.19
1096	176.4	0
1097	177.4	0
1098	177.5	1.26
1099	177.6	3.59
1100	177.7	13.88
1101	177.8	52.19
1102	177.9	82.46
1103	178	46.28
1104	178.1	0
1105	178.2	0
1106	178.3	84.11
1107	178.4	251.4
1108	178.5	385.25
1109	178.6	440.46
1110	178.7	433.52
1111	178.8	417.61
1112	178.9	431.18
1113	179	451.61
1114	179.1	413.13
1115	179.2	288.45
1116	179.3	134.54
1117	179.4	32.85
1118	179.5	18.99
1119	179.6	34.07
1120	179.7	48.32
1121	179.8	38.26
1122	179.9	15.38
1123	180	0
1124	180.3	0
1125	180.4	16.5
1126	180.5	38.31
1127	180.6	67.68
1128	180.7	108.28
1129	180.8	142.68
1130	180.9	154.8
1131	181	141.73
1132	181.1	110.52
1133	181.2	73.14
1134	181.3	41.9
1135	181.4	22.21
1136	181.5	20.96
1137	181.6	46.6
1138	181.7	78.25
1139	181.8	91.76
1140	181.9	73.85
1141	182	43.6
1142	182.1	31.41
1143	182.2	42.51
1144	182.3	72.85
1145	182.4	110.36
1146	182.5	149.36
1147	182.6	191.07
1148	182.7	233.27
1149	182.8	254.57
1150	182.9	226.69
1151	183	151.09
1152	183.1	67.6
1153	183.2	22.86
1154	183.3	21.96
1155	183.4	41.55
1156	183.5	53.48
1157	183.6	46.26
1158	183.7	32.43
1159	183.8	25.3
1160	183.9	25
1161	184	21.45
1162	184.1	14.7
1163	184.2	11.81
1164	184.3	15.88
1165	184.4	27.07
1166	184.5	73.06
1167	184.6	159.97
1168	184.7	248.76
1169	184.8	287.16
1170	184.9	283.14
1171	185	281.47
1172	185.1	280.89
1173	185.2	230.18
1174	185.3	131.01
1175	185.4	58.93
1176	185.5	55.99
1177	185.6	71.77
1178	185.7	44.92
1179	185.8	0
1180	186	0
1181	186.1	17.89
1182	186.2	32.21
1183	186.3	29.02
1184	186.4	38.69
1185	186.5	92.76
1186	186.6	160.58
1187	186.7	220.92
1188	186.8	291.46
1189	186.9	367.22
1190	187	378.07
1191	187.1	270.81
1192	187.2	105.77
1193	187.3	4.38
1194	187.4	0
1195	187.5	10.94
1196	187.6	20.23
1197	187.7	30.16
1198	187.8	32.99
1199	187.9	32.29
1200	188	24.93
1201	188.1	14.09
1202	188.2	8.94
1203	188.3	19.7
1204	188.4	53.67
1205	188.5	108.65
1206	188.6	172.12
1207	188.7	196.82
1208	188.8	156.42
1209	188.9	80.84
1210	189	29.22
1211	189.1	13.12
1212	189.2	0
1213	189.8	0
1214	189.9	3.78
1215	190	27.47
1216	190.1	27.41
1217	190.2	4.46
1218	190.3	0
1219	191.4	0
1220	191.5	152.12
1221	191.6	228.59
1222	191.7	284.22
1223	191.8	339.2
1224	191.9	424.2
1225	192	546
1226	192.1	636.63
1227	192.2	612.15
1228	192.3	460.57
1229	192.4	263.27
1230	192.5	106.12
1231	192.6	40.95
1232	192.7	67.65
1233	192.8	139.85
1234	192.9	171.16
1235	193	124.59
1236	193.1	47.48
1237	193.2	24.67
1238	193.3	94.89
1239	193.4	238.21
1240	193.5	399.43
1241	193.6	516.77
1242	193.7	547.71
1243	193.8	520.08
1244	193.9	490.82
1245	194	476.72
1246	194.1	433.41
1247	194.2	343.71
1248	194.3	257.97
1249	194.4	235.3
1250	194.5	272.35
1251	194.6	291.76
1252	194.7	266.13
1253	194.8	265.81
1254	194.9	346.84
1255	195	448.82
1256	195.1	448.11
1257	195.2	316.85
1258	195.3	150.73
1259	195.4	57.5
1260	195.5	49
1261	195.6	68.22
1262	195.7	83.68
1263	195.8	82.42
1264	195.9	69.24
1265	196	57.99
1266	196.1	57.31
1267	196.2	69.15
1268	196.3	88.25
1269	196.4	116.13
1270	196.5	161.32
1271	196.6	229.06
1272	196.7	309.67
1273	196.8	371.3
1274	196.9	390.34
1275	197	363.68
1276	197.1	299.28
1277	197.2	206.36
1278	197.3	109.54
1279	197.4	41.44
1280	197.5	22.05
1281	197.6	32.34
1282	197.7	43.47
1283	197.8	31.5
1284	197.9	5.94
1285	198	3.42
1286	198.1	30.49
1287	198.2	63.96
1288	198.3	79.16
1289	198.4	76.44
1290	198.5	75.67
1291	198.6	113
1292	198.7	191.4
1293	198.8	257.88
1294	198.9	259.01
1295	199	197.9
1296	199.1	125.88
1297	199.2	73.34
1298	199.3	32.66
1299	199.4	9.51
1300	199.5	36.15
1301	199.6	104.9
1302	199.7	164.47
1303	199.8	177.85
1304	199.9	164.32
1305	200	161.88
1306	200.1	165.73
1307	200.2	145.22
1308	200.3	100.97
1309	200.4	64.33
1310	200.5	58.68
1311	200.6	65.89
1312	200.7	30.46
1313	200.8	0
1314	201.4	0
1315	201.5	42.5
1316	201.6	68.66
1317	201.7	81.32
1318	201.8	99.3
1319	201.9	115.96
1320	202	108.37
1321	202.1	73.93
1322	202.2	37.46
1323	202.3	16.66
1324	202.4	11.15
1325	202.5	18.28
1326	202.6	40.67
1327	202.7	65.3
1328	202.8	72.31
1329	202.9	64.88
1330	203	58.71
1331	203.1	55.1
1332	203.2	42.86
1333	203.3	17.97
1334	203.4	0
1335	203.8	0
1336	203.9	5.31
1337	204	17.47
1338	204.1	16.48
1339	204.2	0
1340	204.4	0
1341	204.5	8.95
1342	204.6	66.76
1343	204.7	75.97
1344	204.8	19.25
1345	204.9	0
1346	205.4	0
1347	205.5	17.29
1348	205.6	37.38
1349	205.7	46.76
1350	205.8	58.53
1351	205.9	69.93
1352	206	69.95
1353	206.1	61.77
1354	206.2	59.97
1355	206.3	71.48
1356	206.4	57.28
1357	206.5	0
1358	207.6	0
1359	207.7	17.81
1360	207.8	29.59
1361	207.9	25.97
1362	208	13.74
1363	208.1	1.28
1364	208.2	0
1365	208.3	0
1366	208.4	6.21
1367	208.5	36.04
1368	208.6	44.99
1369	208.7	0
1370	209.4	0
1371	209.5	21.04
1372	209.6	47.43
1373	209.7	52.1
1374	209.8	46.04
1375	209.9	38.68
1376	210	32.31
1377	210.1	30.32
1378	210.2	33.03
1379	210.3	51.4
1380	210.4	80.35
1381	210.5	116.71
1382	210.6	149.97
1383	210.7	169.16
1384	210.8	172.05
1385	210.9	160.05
1386	211	134.54
1387	211.1	98.28
1388	211.2	63.05
1389	211.3	39.35
1390	211.4	33.85
1391	211.5	37.91
1392	211.6	40.56
1393	211.7	31.55
1394	211.8	20.76
1395	211.9	20.51
1396	212	31.26
1397	212.1	39.32
1398	212.2	34.39
1399	212.3	20.08
1400	212.4	18.37
1401	212.5	45
1402	212.6	101.06
1403	212.7	158.56
1404	212.8	187.41
1405	212.9	173.01
1406	213	130.63
1407	213.1	87.77
1408	213.2	57.99
1409	213.3	33.44
1410	213.4	7.08
1411	213.5	0
1412	213.6	0
1413	213.7	13.54
1414	213.8	27.82
1415	213.9	39.39
1416	214	53.66
1417	214.1	61.29
1418	214.2	56.5
1419	214.3	57.92
1420	214.4	79.36
1421	214.5	118.53
1422	214.6	148.2
1423	214.7	157.06
1424	214.8	145.34
1425	214.9	139.79
1426	215	169.23
1427	215.1	212.62
1428	215.2	211.2
1429	215.3	135.68
1430	215.4	39.83
1431	215.5	0
1432	215.6	0
1433	215.7	0.39
1434	215.8	17.2
1435	215.9	28.24
1436	216	32.15
1437	216.1	32.01
1438	216.2	34.63
1439	216.3	43.27
1440	216.4	57.24
1441	216.5	72.33
1442	216.6	94.9
1443	216.7	121.96
1444	216.8	135.66
1445	216.9	117.44
1446	217	89.66
1447	217.1	95.95
1448	217.2	125.6
1449	217.3	130.57
1450	217.4	79.86
1451	217.5	0
1452	218.3	0
1453	218.4	6.18
1454	218.5	51.43
1455	218.6	73.6
1456	218.7	67.46
1457	218.8	46.11
1458	218.9	20.95
1459	219	6.35
1460	219.1	9.83
1461	219.2	12.48
1462	219.3	7.01
1463	219.4	13.74
1464	219.5	12.32
1465	219.6	0
1466	219.8	0
1467	219.9	22.31
1468	220	56.66
1469	220.1	63.2
1470	220.2	57.14
1471	220.3	54.82
1472	220.4	35.4
1473	220.5	0
1474	221.7	0
1475	221.8	15.4
1476	221.9	71.08
1477	222	87.49
1478	222.1	55.28
1479	222.2	0
1480	223	0
1481	223.1	46.98
1482	223.2	59.96
1483	223.3	58.62
1484	223.4	72.43
1485	223.5	100.81
1486	223.6	123.36
1487	223.7	95.99
1488	223.8	32.95
1489	223.9	0
1490	224.4	0
1491	224.5	28.96
1492	224.6	108.64
1493	224.7	202.3
1494	224.8	251.02
1495	224.9	216.45
1496	225	139.69
1497	225.1	98.68
1498	225.2	104.49
1499	225.3	103.7
1500	225.4	86.46
1501	225.5	84.99
1502	225.6	97.03
1503	225.7	101.41
1504	225.8	71.77
1505	225.9	15.8
1506	226	0
1507	226.2	0
1508	226.3	22.36
1509	226.4	57.76
1510	226.5	84.76
1511	226.6	112.27
1512	226.7	130.16
1513	226.8	127.39
1514	226.9	105.61
1515	227	79.96
1516	227.1	56.84
1517	227.2	37.92
1518	227.3	20.72
1519	227.4	15.89
1520	227.5	29.77
1521	227.6	56.04
1522	227.7	77.35
1523	227.8	77.85
1524	227.9	61.28
1525	228	49.21
1526	228.1	52.04
1527	228.2	61.47
1528	228.3	60.33
1529	228.4	61.56
1530	228.5	81.54
1531	228.6	112.55
1532	228.7	151.61
1533	228.8	182.18
1534	228.9	196.36
1535	229	190.75
1536	229.1	161.22
1537	229.2	112.06
1538	229.3	57.19
1539	229.4	16.31
1540	229.5	12.7
1541	229.6	15.83
1542	229.7	26.52
1543	229.8	34.18
1544	229.9	36.76
1545	230	36.95
1546	230.1	42.43
1547	230.2	58.29
1548	230.3	73.7
1549	230.4	77.69
1550	230.5	74.05
1551	230.6	84.62
1552	230.7	111.01
1553	230.8	124.8
1554	230.9	113.2
1555	231	102.14
1556	231.1	101.69
1557	231.2	89.35
1558	231.3	54.59
1559	231.4	13.67
1560	231.5	6.5
1561	231.6	5.04
1562	231.7	0
1563	232.1	0
1564	232.2	0.46
1565	232.3	11.56
1566	232.4	0
1567	233.8	0
1568	233.9	9.81
1569	234	25.26
1570	234.1	35.36
1571	234.2	48.93
1572	234.3	74.67
1573	234.4	109.64
1574	234.5	139.48
1575	234.6	153.18
1576	234.7	161.79
1577	234.8	186.43
1578	234.9	211.57
1579	235	199.63
1580	235.1	136.43
1581	235.2	64.34
1582	235.3	25.51
1583	235.4	13.69
1584	235.5	14.85
1585	235.6	17.92
1586	235.7	15.4
1587	235.8	15.18
1588	235.9	24.77
1589	236	39.53
1590	236.1	43.85
1591	236.2	33
1592	236.3	9.9
1593	236.4	0
1594	236.5	0
1595	236.6	28.95
1596	236.7	63.67
1597	236.8	68.98
1598	236.9	50.53
1599	237	31.43
1600	237.1	20.66
1601	237.2	23.68
1602	237.3	39.52
1603	237.4	61.36
1604	237.5	70.82
1605	237.6	61.33
1606	237.7	53.22
1607	237.8	62.21
1608	237.9	86.48
1609	238	104.36
1610	238.1	99.39
1611	238.2	75.33
1612	238.3	62.93
1613	238.4	83.37
1614	238.5	139.46
1615	238.6	217.28
1616	238.7	299.21
1617	238.8	361.88
1618	238.9	382.69
1619	239	361.3
1620	239.1	322.14
1621	239.2	272.21
1622	239.3	202.48
1623	239.4	113.83
1624	239.5	45.53
1625	239.6	22.74
1626	239.7	21.17
1627	239.8	24.37
1628	239.9	31.39
1629	240	34.85
1630	240.1	32.6
1631	240.2	37.41
1632	240.3	67.81
1633	240.4	116.33
1634	240.5	170.55
1635	240.6	207.77
1636	240.7	212.9
1637	240.8	194.18
1638	240.9	178.5
1639	241	179.04
1640	241.1	174.26
1641	241.2	136.71
1642	241.3	72.35
1643	241.4	17.74
1644	241.5	0
1645	241.6	0
1646	241.7	0.9
1647	241.8	6.28
1648	241.9	11.02
1649	242	15.53
1650	242.1	14.58
1651	242.2	5.07
1652	242.3	0
1653	242.4	0
1654	242.5	28.61
1655	242.6	62.55
1656	242.7	73.07
1657	242.8	57.38
1658	242.9	38.52
1659	243	29.66
1660	243.1	29.8
1661	243.2	33.56
1662	243.3	44.42
1663	243.4	65.33
1664	243.5	96.74
1665	243.6	127.01
1666	243.7	146.24
1667	243.8	148.44
1668	243.9	141.14
1669	244	136.17
1670	244.1	137.07
1671	244.2	129.04
1672	244.3	95.37
1673	244.4	50.78
1674	244.5	29.01
1675	244.6	33.31
1676	244.7	37.18
1677	244.8	46.14
1678	244.9	76.89
1679	245	115.46
1680	245.1	122.91
1681	245.2	91.4
1682	245.3	47.55
1683	245.4	16.93
1684	245.5	7.46
1685	245.6	5.96
1686	245.7	7.24
1687	245.8	7.38
1688	245.9	5.42
1689	246	1.23
1690	246.1	0
1691	246.2	0
1692	246.3	2.7
1693	246.4	19.44
1694	246.5	35.64
1695	246.6	45.4
1696	246.7	51.09
1697	246.8	49.05
1698	246.9	35.24
1699	247	11.15
1700	247.1	0
1701	248.4	0
1702	248.5	9.14
1703	248.6	9.31
1704	248.7	0
1705	249.2	0
1706	249.3	1.21
1707	249.4	11.13
1708	249.5	10.23
1709	249.6	2.61
1710	249.7	0
1711	250	0
1712	250.1	10.41
1713	250.2	32.46
1714	250.3	57.59
1715	250.4	76.5
1716	250.5	94.37
1717	250.6	112.88
1718	250.7	136.13
1719	250.8	164.99
1720	250.9	184.52
1721	251	177.49
1722	251.1	131.94
1723	251.2	64.21
1724	251.3	15.46
1725	251.4	5.63
1726	251.5	28.15
1727	251.6	40.12
1728	251.7	40.81
1729	251.8	39.58
1730	251.9	42.05
1731	252	49.22
1732	252.1	54.1
1733	252.2	60.71
1734	252.3	64.04
1735	252.4	71.86
1736	252.5	81.53
1737	252.6	94.52
1738	252.7	111.32
1739	252.8	124.07
1740	252.9	116.03
1741	253	93.6
1742	253.1	79.26
1743	253.2	78.2
1744	253.3	68.7
1745	253.4	47.66
1746	253.5	30.08
1747	253.6	29.74
1748	253.7	36.1
1749	253.8	39.88
1750	253.9	40.68
1751	254	38.27
1752	254.1	30.8
1753	254.2	20.76
1754	254.3	16.54
1755	254.4	17.59
1756	254.5	16.97
1757	254.6	18.5
1758	254.7	31.85
1759	254.8	53.3
1760	254.9	65.92
1761	255	58.96
1762	255.1	39.09
1763	255.2	19.33
1764	255.3	7.18
1765	255.4	0.39
1766	255.5	0
1767	255.6	2.93
1768	255.7	15.43
1769	255.8	29.68
1770	255.9	35.53
1771	256	30.28
1772	256.1	21.81
1773	256.2	18.91
1774	256.3	22.98
1775	256.4	29.4
1776	256.5	35.54
1777	256.6	47.25
1778	256.7	65.62
1779	256.8	86.49
1780	256.9	97.01
1781	257	89.66
1782	257.1	66.04
1783	257.2	38.58
1784	257.3	21.99
1785	257.4	17.93
1786	257.5	15.94
1787	257.6	13.63
1788	257.7	9.18
1789	257.8	3.8
1790	257.9	0.49
1791	258	0.15
1792	258.1	2.32
1793	258.2	7.34
1794	258.3	15.87
1795	258.4	26
1796	258.5	32.47
1797	258.6	24.82
1798	258.7	4.28
1799	258.8	0
1800	259	0
1801	259.1	10.31
1802	259.2	14.65
1803	259.3	12.29
1804	259.4	8.03
1805	259.5	5.46
1806	259.6	2.75
1807	259.7	0
1808	260.1	0
1809	260.2	1.57
1810	260.3	0
1811	260.4	2.26
1812	260.5	19.78
1813	260.6	45.06
1814	260.7	61.44
1815	260.8	58.31
1816	260.9	40.12
1817	261	27.4
1818	261.1	27.64
1819	261.2	29.88
1820	261.3	21.79
1821	261.4	5.29
1822	261.5	0
1823	261.9	0
1824	262	17.48
1825	262.1	39.35
1826	262.2	58.8
1827	262.3	73.33
1828	262.4	89.27
1829	262.5	109.05
1830	262.6	123.86
1831	262.7	122.91
1832	262.8	105.88
1833	262.9	76.28
1834	263	38.35
1835	263.1	0.07
1836	263.2	0
1837	264.3	0
1838	264.4	1.58
1839	264.5	12.15
1840	264.6	16.68
1841	264.7	1.25
1842	264.8	0
1843	265.1	0
1844	265.2	9.99
1845	265.3	9.89
1846	265.4	6.27
1847	265.5	12.9
1848	265.6	31.25
1849	265.7	50.64
1850	265.8	55.27
1851	265.9	40.42
1852	266	20.9
1853	266.1	12.76
1854	266.2	16.16
1855	266.3	19.69
1856	266.4	14.11
1857	266.5	6.94
1858	266.6	11.62
1859	266.7	32.66
1860	266.8	58.33
1861	266.9	71.61
1862	267	69.08
1863	267.1	58.99
1864	267.2	46.77
1865	267.3	29.59
1866	267.4	9.73
1867	267.5	0
1868	267.6	3.19
1869	267.7	13.77
1870	267.8	21.51
1871	267.9	21.95
1872	268	17.69
1873	268.1	14.52
1874	268.2	14.05
1875	268.3	15.61
1876	268.4	14.51
1877	268.5	8.09
1878	268.6	0
1879	268.7	0
1880	268.8	4.39
1881	268.9	27.13
1882	269	39.52
1883	269.1	27.94
1884	269.2	4.53
1885	269.3	0
1886	269.4	11.41
1887	269.5	43.81
1888	269.6	66.85
1889	269.7	63.64
1890	269.8	33.6
1891	269.9	0
1892	270.2	0
1893	270.3	0.45
1894	270.4	13.33
1895	270.5	25.24
1896	270.6	30.54
1897	270.7	23.49
1898	270.8	7.21
1899	270.9	0
1900	271.2	0
1901	271.3	15.26
1902	271.4	22.32
1903	271.5	18.34
1904	271.6	13.49
1905	271.7	12.37
1906	271.8	17.52
1907	271.9	30.16
1908	272	45.57
1909	272.1	53.53
1910	272.2	47.23
1911	272.3	33.38
1912	272.4	23.92
1913	272.5	18.01
1914	272.6	16.18
1915	272.7	21.47
1916	272.8	34.62
1917	272.9	46.79
1918	273	46.1
1919	273.1	33.65
1920	273.2	18.1
1921	273.3	7.26
1922	273.4	2.69
1923	273.5	0.67
1924	273.6	0.06
1925	273.7	1.83
1926	273.8	7.5
1927	273.9	14.07
1928	274	15.62
1929	274.1	10.21
1930	274.2	2.99
1931	274.3	0.28
1932	274.4	2.76
1933	274.5	6.04
1934	274.6	8.11
1935	274.7	11.79
1936	274.8	19.59
1937	274.9	27.62
1938	275	28.46
1939	275.1	21.53
1940	275.2	13.55
1941	275.3	9.21
1942	275.4	6.23
1943	275.5	6.14
1944	275.6	14.34
1945	275.7	30.73
1946	275.8	43.05
1947	275.9	40.19
1948	276	27.91
1949	276.1	18.55
1950	276.2	16.19
1951	276.3	15
1952	276.4	10.13
1953	276.5	6.52
1954	276.6	12.4
1955	276.7	25.72
1956	276.8	43.36
1957	276.9	61.26
1958	277	69.42
1959	277.1	58.72
1960	277.2	28.11
1961	277.3	0
1962	277.5	0
1963	277.6	7.48
1964	277.7	18.09
1965	277.8	14.93
1966	277.9	3.48
1967	278	0
1968	278.1	0
1969	278.2	1.14
1970	278.3	5.47
1971	278.4	10.64
1972	278.5	15.44
1973	278.6	16.97
1974	278.7	13.86
1975	278.8	8.61
1976	278.9	9.42
1977	279	18.57
1978	279.1	27.07
1979	279.2	25.5
1980	279.3	17.1
1981	279.4	9.46
1982	279.5	6.31
1983	279.6	7.48
1984	279.7	10.7
1985	279.8	12.63
1986	279.9	10.9
1987	280	7.23
1988	280.1	0.41
1989	280.2	0
1990	280.5	0
1991	280.6	8.38
1992	280.7	39.7
1993	280.8	62.98
1994	280.9	24.02
1995	281	0
1996	281.4	0
1997	281.5	26.12
[truncated: 2,813 more rows]

## Sheet: Sheet2
+ESI Scan (rt: 1.10-1.40 min, 66 scans) Frag=100.0V CF=0.000 DF=0.000 4608-02.d Subtract
Index	X	Y
0	50	0.62
1	50.1	0.17
2	50.2	0
3	50.4	0
4	50.5	0.4
5	50.6	0.95
6	50.7	0.82
7	50.8	0.14
8	50.9	0
9	51.2	0
10	51.3	0.01
11	51.4	0.1
12	51.5	0
13	52.3	0
14	52.4	0.05
15	52.5	0.15
16	52.6	0.22
17	52.7	0.27
18	52.8	0.31
19	52.9	0.27
20	53	0
21	53.6	0
22	53.7	0.22
23	53.8	0.59
24	53.9	0.8
25	54	0.91
26	54.1	1.21
27	54.2	1.69
28	54.3	1.07
29	54.4	0
30	55.7	0
31	55.8	1.7
32	55.9	0
33	56.1	0
34	56.2	0.92
35	56.3	0
36	57.6	0
37	57.7	1.9
38	57.8	25.9
39	57.9	10.48
40	58	0
41	59.7	0
42	59.8	44.35
43	59.9	0
44	61.7	0
45	61.8	18.48
46	61.9	9.45
47	62	0
48	63.4	0
49	63.5	1.42
50	63.6	3
51	63.7	0.92
52	63.8	0
53	64.4	0
54	64.5	1.01
55	64.6	0.93
56	64.7	0.49
57	64.8	0.17
58	64.9	0
59	65.5	0
60	65.6	0.36
61	65.7	0.67
62	65.8	0.67
63	65.9	0.52
64	66	0.47
65	66.1	0.49
66	66.2	0.4
67	66.3	0.23
68	66.4	0.32
69	66.5	1
70	66.6	1.76
71	66.7	1.18
72	66.8	0
73	67.3	0
74	67.4	0.66
75	67.5	0.74
76	67.6	0.52
77	67.7	0.26
78	67.8	0.25
79	67.9	0.8
80	68	0.99
81	68.1	0
82	71.6	0
83	71.7	17.2
84	71.8	43.56
85	71.9	47.11
86	72	32.94
87	72.1	0
88	73.5	0
89	73.6	7272.03
90	73.7	32200.6
91	73.8	70484.1
92	73.9	116339
93	74	155050
94	74.1	175538
95	74.2	178664
96	74.3	167904
97	74.4	139975
98	74.5	94075.9
99	74.6	43841.2
100	74.7	8962.66
101	74.8	0
102	74.9	0
103	75	3044.84
104	75.1	5561.58
105	75.2	6216.44
106	75.3	6135.15
107	75.4	5373.01
108	75.5	3721.2
109	75.6	1703.57
110	75.7	329.17
111	75.8	2.26
112	75.9	81.28
113	76	248.28
114	76.1	310.38
115	76.2	315.81
116	76.3	324.06
117	76.4	294.53
118	76.5	188.08
119	76.6	42.65
120	76.7	0
121	78.5	0
122	78.6	9.55
123	78.7	52.89
124	78.8	39.07
125	78.9	7.55
126	79	0
127	79.9	0
128	80	1.4
129	80.1	9.13
130	80.2	10.23
131	80.3	5.72
132	80.4	0
133	81.6	0
134	81.7	17.06
135	81.8	27.98
136	81.9	17.36
137	82	1.87
138	82.1	0
139	86	0
140	86.1	1.05
141	86.2	0
142	91.6	0
143	91.7	15.21
144	91.8	17.79
145	91.9	12.71
146	92	6.21
147	92.1	0
148	92.4	0
149	92.5	55.24
150	92.6	567.71
151	92.7	1607.34
152	92.8	2875.61
153	92.9	3826.72
154	93	4147.35
155	93.1	4066.13
156	93.2	3930.39
157	93.3	3675.09
158	93.4	3007.56
159	93.5	1944.84
160	93.6	932.07
161	93.7	349.86
162	93.8	192.81
163	93.9	141.64
164	94	96.72
165	94.1	68.39
166	94.2	50.06
167	94.3	44.61
168	94.4	38.02
169	94.5	45.19
170	94.6	58.31
171	94.7	66.19
172	94.8	82.82
173	94.9	129.69
174	95	203.96
175	95.1	265.37
176	95.2	276.84
177	95.3	258.14
178	95.4	465.35
179	95.5	1362.93
180	95.6	3291.89
181	95.7	6306.93
182	95.8	10065.8
183	95.9	13751.5
184	96	16347.5
185	96.1	17210.4
186	96.2	16242.7
187	96.3	13547.1
188	96.4	9434.55
189	96.5	4884.09
190	96.6	1334.34
191	96.7	0
192	99.6	0
193	99.7	148.35
194	99.8	219.47
195	99.9	230.23
196	100	232.77
197	100.1	203.74
198	100.2	127.51
199	100.3	60.49
200	100.4	44.9
201	100.5	141.44
202	100.6	406.32
203	100.7	805.64
204	100.8	1074.01
205	100.9	982.5
206	101	700.46
207	101.1	616.81
208	101.2	784.23
209	101.3	855.88
210	101.4	603.12
211	101.5	175.95
212	101.6	0
213	104	0
214	104.1	7.91
215	104.2	14.21
216	104.3	0
217	105.5	0
218	105.6	27.09
219	105.7	26.46
220	105.8	10.05
221	105.9	0
222	108.3	0
223	108.4	191.15
224	108.5	720.24
225	108.6	1508.6
226	108.7	2457.92
227	108.8	3229.86
228	108.9	3503.08
229	109	3299.89
230	109.1	3011.07
231	109.2	2864.19
232	109.3	2599.74
233	109.4	1907.26
234	109.5	981.07
235	109.6	267.54
236	109.7	64.9
237	109.8	66.33
238	109.9	70.4
239	110	53.43
240	110.1	36.29
241	110.2	21.8
242	110.3	0
243	111.5	0
244	111.6	9.03
245	111.7	16.54
246	111.8	0
247	117.5	0
248	117.6	40.92
249	117.7	49.94
250	117.8	44.03
251	117.9	38.64
252	118	22.91
253	118.1	0
254	119.9	0
255	120	2.12
256	120.1	15.95
257	120.2	10.67
258	120.3	0
259	121.2	0
260	121.3	131.61
261	121.4	1087.49
262	121.5	1824.38
263	121.6	2242.34
264	121.7	2252.67
265	121.8	1852.28
266	121.9	1206.33
267	122	596.91
268	122.1	285.4
269	122.2	347.7
270	122.3	593.87
271	122.4	681.38
272	122.5	490.02
273	122.6	209.12
274	122.7	71.12
275	122.8	55.22
276	122.9	57.24
277	123	27.36
278	123.1	14.56
279	123.2	37.33
280	123.3	61.9
281	123.4	69.14
282	123.5	70.31
283	123.6	75.4
284	123.7	86.98
285	123.8	80.08
286	123.9	37.12
287	124	0
288	127.5	0
289	127.6	30.6
290	127.7	41.76
291	127.8	34.19
292	127.9	6.25
293	128	0
294	128.7	0
295	128.8	216.54
296	128.9	1584.92
297	129	4215.6
298	129.1	8149.87
299	129.2	12725.2
300	129.3	16795
301	129.4	19576.4
302	129.5	21136.8
303	129.6	21749.4
304	129.7	21013.9
305	129.8	18117.9
306	129.9	13093.1
307	130	7461.62
308	130.1	3279.57
309	130.2	1442.2
310	130.3	1166.7
311	130.4	1163.75
312	130.5	779.26
313	130.6	231.78
314	130.7	0
315	131.4	0
316	131.5	320.53
317	131.6	536.7
318	131.7	601.35
319	131.8	605.24
320	131.9	601.78
321	132	586.47
322	132.1	596.25
323	132.2	639.3
324	132.3	652.66
325	132.4	532.45
326	132.5	324.67
327	132.6	170.6
328	132.7	101.8
329	132.8	5.21
330	132.9	0
331	133.4	0
332	133.5	90.5
333	133.6	141.39
334	133.7	43.01
335	133.8	0
336	134.2	0
337	134.3	8.49
338	134.4	5.03
339	134.5	0
340	135.8	0
341	135.9	93.24
342	136	305.73
343	136.1	521.37
344	136.2	680.69
345	136.3	815.4
346	136.4	976.65
347	136.5	1016.83
348	136.6	677.96
349	136.7	0
350	136.8	0
351	136.9	514.12
352	137	2960.74
353	137.1	6562.17
354	137.2	10734.8
355	137.3	14939.5
356	137.4	18377
357	137.5	20185.9
358	137.6	20048
359	137.7	18091.3
360	137.8	14468.7
361	137.9	9793.53
362	138	5564.46
363	138.1	3213.44
364	138.2	2741.34
365	138.3	3053.16
366	138.4	3141.67
367	138.5	2854.01
368	138.6	2437.67
369	138.7	2015.98
370	138.8	1556.81
371	138.9	1057.27
372	139	668.04
373	139.1	556.17
374	139.2	705.28
375	139.3	927.28
376	139.4	973.38
377	139.5	827.25
378	139.6	641.08
379	139.7	517.13
380	139.8	435.03
381	139.9	331.74
382	140	223.25
383	140.1	148.83
384	140.2	97.54
385	140.3	54.45
386	140.4	15.59
387	140.5	0
388	140.8	0
389	140.9	121.48
390	141	292.92
391	141.1	434.77
392	141.2	467.61
393	141.3	378.68
394	141.4	244.19
395	141.5	159.92
396	141.6	160.27
397	141.7	174.51
398	141.8	98.94
399	141.9	0
400	143.5	0
401	143.6	29.4
402	143.7	0
403	144.8	0
404	144.9	158.79
405	145	1814.07
406	145.1	4495.31
407	145.2	7875.35
408	145.3	11038.7
409	145.4	12976.5
410	145.5	13410
411	145.6	12910.8
412	145.7	12019.3
413	145.8	10560.3
414	145.9	8167.18
415	146	5208.46
416	146.1	2710.89
417	146.2	1434.25
418	146.3	1540.95
419	146.4	3186.97
420	146.5	6664.63
421	146.6	11802.3
422	146.7	17622.6
423	146.8	23011.9
424	146.9	27141.7
425	147	29411
426	147.1	29678.7
427	147.2	28179.6
428	147.3	24675.2
429	147.4	18638.4
430	147.5	11003.9
431	147.6	4479.65
432	147.7	1259.65
433	147.8	1002.5
434	147.9	1779.22
435	148	2268.78
436	148.1	2298.11
437	148.2	2074.67
438	148.3	1686.73
439	148.4	1139.71
440	148.5	537.19
441	148.6	55.11
442	148.7	0
443	149.2	0
444	149.3	1.67
445	149.4	38.75
446	149.5	50.34
447	149.6	43.11
448	149.7	13.45
449	149.8	0
450	150.2	0
451	150.3	16.08
452	150.4	0
453	153.6	0
454	153.7	6.4
455	153.8	0
456	157.8	0
457	157.9	207.69
458	158	415.17
459	158.1	456.48
460	158.2	317.25
461	158.3	115.52
462	158.4	0
463	159.3	0
464	159.4	104.46
465	159.5	208.17
466	159.6	326.57
467	159.7	457.04
468	159.8	543.01
469	159.9	559.79
470	160	558.71
471	160.1	580.5
472	160.2	547.54
473	160.3	363.53
474	160.4	19.52
475	160.5	0
476	162.2	0
477	162.3	7.29
478	162.4	13.42
479	162.5	0
480	163.2	0
481	163.3	3.38
482	163.4	17.68
483	163.5	15.06
484	163.6	11.25
485	163.7	6.56
486	163.8	3.65
487	163.9	0
488	164	0
489	164.1	1.93
490	164.2	12.02
491	164.3	18.84
492	164.4	16.4
493	164.5	6.07
494	164.6	0
495	164.7	7.38
496	164.8	26.18
497	164.9	31.96
498	165	2.1
499	165.1	0
500	165.2	0
501	165.3	29.79
502	165.4	179.63
503	165.5	370.64
504	165.6	539.95
505	165.7	643.02
506	165.8	696.74
507	165.9	726.8
508	166	747.95
509	166.1	713.34
510	166.2	599.04
511	166.3	419.14
512	166.4	235.88
513	166.5	105.72
514	166.6	82.76
515	166.7	114.26
516	166.8	124.01
517	166.9	74.27
518	167	25.72
519	167.1	12.57
520	167.2	13.05
521	167.3	7.49
522	167.4	0
523	167.6	0
524	167.7	0.34
525	167.8	10.04
526	167.9	27.98
527	168	49.66
528	168.1	63.44
529	168.2	53.47
530	168.3	40.96
531	168.4	113.53
532	168.5	292.7
533	168.6	523.06
534	168.7	760.95
535	168.8	1023.87
536	168.9	1284.96
537	169	1427.54
538	169.1	1367.63
539	169.2	1151.62
540	169.3	871.73
541	169.4	570.23
542	169.5	288.53
543	169.6	81.08
544	169.7	0
545	169.9	0
546	170	42.25
547	170.1	96.97
548	170.2	98.35
549	170.3	33.78
550	170.4	0
551	172.6	0
552	172.7	31.95
553	172.8	72.95
554	172.9	87.53
555	173	71.51
556	173.1	56.03
557	173.2	73.2
558	173.3	96.08
559	173.4	91.53
560	173.5	76.17
561	173.6	67.17
562	173.7	48.54
563	173.8	0
564	174.1	0
565	174.2	51.53
566	174.3	136.33
567	174.4	75.22
568	174.5	0
569	175.3	0
570	175.4	21.36
571	175.5	69.15
572	175.6	57.2
573	175.7	36.91
574	175.8	35.93
575	175.9	55.68
576	176	87.45
577	176.1	115.39
578	176.2	116.23
579	176.3	62.25
580	176.4	0
581	179.8	0
582	179.9	2.27
583	180	4.4
584	180.1	9.78
585	180.2	20.3
586	180.3	31.15
587	180.4	27.18
588	180.5	3.34
589	180.6	0
590	180.9	0
591	181	9.18
592	181.1	24.36
593	181.2	27.61
594	181.3	16.98
595	181.4	5.73
596	181.5	4.9
597	181.6	13.81
598	181.7	32.93
599	181.8	55.07
600	181.9	69.27
601	182	79.08
602	182.1	83.76
603	182.2	70.68
604	182.3	27.76
605	182.4	0
606	183.6	0
607	183.7	9.32
608	183.8	18.19
609	183.9	16.14
610	184	4.01
611	184.1	0
612	187.5	0
613	187.6	7.32
614	187.7	12.24
615	187.8	12.19
616	187.9	1.13
617	188	0
618	195.3	0
619	195.4	16.95
620	195.5	51.89
621	195.6	60.82
622	195.7	43.65
623	195.8	18.43
624	195.9	1.38
625	196	0
626	196.1	0
627	196.2	1.75
628	196.3	5.73
629	196.4	0
630	197.3	0
631	197.4	4.04
632	197.5	15.55
633	197.6	18.62
634	197.7	12.23
635	197.8	7.65
636	197.9	11.62
637	198	14.79
638	198.1	0
639	199.7	0
640	199.8	27.63
641	199.9	54.06
642	200	51.49
643	200.1	19.01
644	200.2	0
645	201.4	0
646	201.5	55.37
647	201.6	117.27
648	201.7	170.6
649	201.8	215.3
650	201.9	268.06
651	202	325.3
652	202.1	339.35
653	202.2	273.6
654	202.3	146.61
655	202.4	25.55
656	202.5	0
657	202.6	14.77
658	202.7	90.53
659	202.8	145.46
660	202.9	144.85
661	203	100.82
662	203.1	39.06
663	203.2	0
664	203.5	0
665	203.6	79.57
666	203.7	153.03
667	203.8	181.4
668	203.9	164.24
669	204	132.64
670	204.1	102.46
671	204.2	63.58
672	204.3	13.47
673	204.4	0
674	206.3	0
675	206.4	246.65
676	206.5	822.3
677	206.6	1478.12
678	206.7	2236.36
679	206.8	3053.37
680	206.9	3703.71
681	207	4013.47
682	207.1	4012.24
683	207.2	3686.84
684	207.3	2875.13
685	207.4	1638.53
686	207.5	481.48
687	207.6	0
688	207.7	7.38
689	207.8	174.05
690	207.9	317.01
691	208	267.83
692	208.1	124.37
693	208.2	13.36
694	208.3	0
695	208.9	0
696	209	105.27
697	209.1	195.71
698	209.2	218.3
699	209.3	197.53
700	209.4	187.94
701	209.5	231.78
702	209.6	298.41
703	209.7	333.57
704	209.8	321.49
705	209.9	298.99
706	210	303.09
707	210.1	309.25
708	210.2	263.83
709	210.3	154.72
710	210.4	48.58
711	210.5	0
712	211	0
713	211.1	5.15
714	211.2	0
715	211.4	0
716	211.5	14.3
717	211.6	11.98
718	211.7	6.23
719	211.8	15.26
720	211.9	42.43
721	212	70.46
722	212.1	80.82
723	212.2	65.7
724	212.3	31.31
725	212.4	0
726	213.1	0
727	213.2	15.34
728	213.3	127.92
729	213.4	325.34
730	213.5	583.47
731	213.6	783.53
732	213.7	832.61
733	213.8	749.6
734	213.9	670.19
735	214	664.87
736	214.1	628.8
737	214.2	429.45
738	214.3	113.89
739	214.4	0
740	214.8	0
741	214.9	55.04
742	215	124.38
743	215.1	123.75
744	215.2	64.63
745	215.3	6.53
746	215.4	0
747	216.4	0
748	216.5	6.34
749	216.6	30.58
750	216.7	41.45
751	216.8	31.26
752	216.9	3.29
753	217	0
754	217.2	0
755	217.3	23.49
756	217.4	17.53
757	217.5	0
758	218.9	0
759	219	0.17
760	219.1	0
761	225.4	0
762	225.5	212.11
763	225.6	348.44
764	225.7	333.35
765	225.8	267.3
766	225.9	231.32
767	226	249.04
768	226.1	255.96
769	226.2	192.26
770	226.3	74.22
771	226.4	0
772	227.2	0
773	227.3	25.45
774	227.4	54.64
775	227.5	66.98
776	227.6	60.86
777	227.7	38.05
778	227.8	0
779	229.2	0
780	229.3	9.58
781	229.4	3.27
782	229.5	0
783	229.7	0
784	229.8	1.64
785	229.9	8.29
786	230	23.67
787	230.1	43.23
788	230.2	59.6
789	230.3	29.05
790	230.4	0
791	230.5	61.99
792	230.6	244.91
793	230.7	388.5
794	230.8	269.5
795	230.9	0
796	231.3	0
797	231.4	55.55
798	231.5	26.72
799	231.6	0
800	233.4	0
801	233.5	31.97
802	233.6	95.77
803	233.7	155.13
804	233.8	205.1
805	233.9	243.94
806	234	266.53
807	234.1	255.77
808	234.2	199.52
809	234.3	124.49
810	234.4	73.67
811	234.5	46.71
812	234.6	31.16
813	234.7	59.56
814	234.8	144.19
815	234.9	281.13
816	235	439.88
817	235.1	560.96
818	235.2	554.22
819	235.3	399.61
820	235.4	204.96
821	235.5	115.86
822	235.6	131.98
823	235.7	175.35
824	235.8	157.81
825	235.9	99.05
826	236	74.01
827	236.1	101.27
828	236.2	125.17
829	236.3	99.49
830	236.4	55.74
831	236.5	26.82
832	236.6	0
833	237.4	0
834	237.5	8.59
835	237.6	21.65
836	237.7	29.19
837	237.8	25.21
838	237.9	18.19
839	238	18.5
840	238.1	23.06
841	238.2	20.72
842	238.3	10.46
843	238.4	5.92
844	238.5	13.2
845	238.6	25.92
846	238.7	41.22
847	238.8	61.97
848	238.9	78.7
849	239	76.51
850	239.1	46.7
851	239.2	4.72
852	239.3	0
853	239.4	0
854	239.5	2.22
855	239.6	17.46
856	239.7	21.95
857	239.8	28.71
858	239.9	34.68
859	240	33.17
860	240.1	25.21
861	240.2	9.75
862	240.3	0
863	241.3	0
864	241.4	1.32
865	241.5	12.84
866	241.6	14.27
867	241.7	8.59
868	241.8	0.6
869	241.9	0
870	242.2	0
871	242.3	9.33
872	242.4	5.94
873	242.5	0
874	243.1	0
875	243.2	0.75
876	243.3	16.83
877	243.4	17.63
878	243.5	12.67
879	243.6	0.29
880	243.7	0
881	244.6	0
882	244.7	35.69
883	244.8	96.29
884	244.9	84.78
885	245	18.94
886	245.1	0
887	245.2	2.39
888	245.3	39.66
889	245.4	44.16
890	245.5	20.86
891	245.6	0
892	246.1	0
893	246.2	17.08
894	246.3	83.14
895	246.4	202.54
896	246.5	387.34
897	246.6	631.25
898	246.7	858.74
899	246.8	979.28
900	246.9	967.14
901	247	866.8
902	247.1	738.47
903	247.2	608.69
904	247.3	486.78
905	247.4	392.35
906	247.5	341.04
907	247.6	396.42
908	247.7	569.41
909	247.8	781.35
910	247.9	905.82
911	248	853.35
912	248.1	644.19
913	248.2	392.54
914	248.3	234.86
915	248.4	267.53
916	248.5	510.12
917	248.6	874.2
918	248.7	1187.62
919	248.8	1304.13
920	248.9	1277.6
921	249	1322.2
922	249.1	1560.73
923	249.2	1780.6
924	249.3	1623.63
925	249.4	1028.93
926	249.5	359.81
927	249.6	26.16
928	249.7	0
929	249.8	56.76
930	249.9	165.58
931	250	255.6
932	250.1	281.91
933	250.2	233.42
934	250.3	143.65
935	250.4	61.02
936	250.5	8.91
937	250.6	0
938	250.7	0
939	250.8	7.07
940	250.9	69.91
941	251	127.2
942	251.1	139.2
943	251.2	113.4
944	251.3	87.47
945	251.4	69.67
946	251.5	41.36
947	251.6	4.91
948	251.7	0
949	251.8	18.59
950	251.9	66.42
951	252	95.02
952	252.1	86.12
953	252.2	61.55
954	252.3	38.47
955	252.4	15.25
956	252.5	0
957	253.2	0
958	253.3	8.42
959	253.4	10.34
960	253.5	17.05
961	253.6	29.5
962	253.7	45.29
963	253.8	58.14
964	253.9	58.6
965	254	39.82
966	254.1	12.64
967	254.2	0
968	254.3	13.23
969	254.4	48.76
970	254.5	85.28
971	254.6	101.53
972	254.7	88.27
973	254.8	56.21
974	254.9	23.08
975	255	13.39
976	255.1	25.62
977	255.2	38.49
978	255.3	34.15
979	255.4	14.94
980	255.5	1.46
981	255.6	0
982	256.6	0
983	256.7	10
984	256.8	33.45
985	256.9	35.63
986	257	14.31
987	257.1	0
988	257.2	0
989	257.3	7.39
990	257.4	8.56
991	257.5	0
992	257.9	0
993	258	5.15
994	258.1	2.55
995	258.2	0
996	258.7	0
997	258.8	31.44
998	258.9	82.94
999	259	93.24
1000	259.1	68.01
1001	259.2	35.26
1002	259.3	11.62
1003	259.4	3.9
1004	259.5	14.84
1005	259.6	43.64
1006	259.7	73.14
1007	259.8	84.45
1008	259.9	71.05
1009	260	43.38
1010	260.1	19.94
1011	260.2	7.96
1012	260.3	13.53
1013	260.4	22.68
1014	260.5	21.16
1015	260.6	10.79
1016	260.7	6.33
1017	260.8	21.33
1018	260.9	46.36
1019	261	52.38
1020	261.1	22.5
1021	261.2	0
1022	262.1	0
1023	262.2	20.83
1024	262.3	60.09
1025	262.4	110.6
1026	262.5	161.64
1027	262.6	194.56
1028	262.7	181.04
1029	262.8	128.99
1030	262.9	81.62
1031	263	67.7
1032	263.1	81.35
1033	263.2	108.51
1034	263.3	174.74
1035	263.4	298.65
1036	263.5	478.88
1037	263.6	662.83
1038	263.7	783.61
1039	263.8	833.03
1040	263.9	856.68
1041	264	878.72
1042	264.1	832.91
1043	264.2	638.45
1044	264.3	337.64
1045	264.4	123.21
1046	264.5	61.08
1047	264.6	80.16
1048	264.7	85.08
1049	264.8	56.45
1050	264.9	0
1051	265.3	0
1052	265.4	8.56
1053	265.5	37.1
1054	265.6	63.4
1055	265.7	79.96
1056	265.8	97.31
1057	265.9	118.35
1058	266	130.23
1059	266.1	116.77
1060	266.2	97.9
1061	266.3	106.54
1062	266.4	135.77
1063	266.5	140.62
1064	266.6	109.99
1065	266.7	86.17
1066	266.8	110.75
1067	266.9	173.14
1068	267	222.67
1069	267.1	227.66
1070	267.2	176.92
1071	267.3	97.02
1072	267.4	35.93
1073	267.5	15.83
1074	267.6	8.9
1075	267.7	9.84
1076	267.8	15.44
1077	267.9	26.21
1078	268	36.3
1079	268.1	38.52
1080	268.2	30.78
1081	268.3	15.82
1082	268.4	4.09
1083	268.5	1.35
1084	268.6	7.28
1085	268.7	11.04
1086	268.8	0
1087	269.7	0
1088	269.8	5.9
1089	269.9	14.85
1090	270	21.74
1091	270.1	18.8
1092	270.2	10.21
1093	270.3	7.07
1094	270.4	10.04
1095	270.5	17.52
1096	270.6	29.89
1097	270.7	40.42
1098	270.8	35.54
1099	270.9	10.66
1100	271	0
1101	271.3	0
1102	271.4	8.92
1103	271.5	17.51
1104	271.6	16.04
1105	271.7	11.28
1106	271.8	10.07
1107	271.9	13.73
1108	272	18.32
1109	272.1	19.36
1110	272.2	16.13
1111	272.3	11.16
1112	272.4	5.63
1113	272.5	0
1114	273.3	0
1115	273.4	4.87
1116	273.5	11
1117	273.6	11.55
1118	273.7	10.96
1119	273.8	13.11
1120	273.9	15.8
1121	274	15.71
1122	274.1	13.12
1123	274.2	15.1
1124	274.3	30.3
1125	274.4	61.49
1126	274.5	88.5
1127	274.6	88.93
1128	274.7	71.32
1129	274.8	53.51
1130	274.9	35.75
1131	275	16.09
1132	275.1	3.72
1133	275.2	7.71
1134	275.3	14.95
1135	275.4	14.2
1136	275.5	8.41
1137	275.6	3.24
1138	275.7	5.97
1139	275.8	17.66
1140	275.9	24.25
1141	276	10.2
1142	276.1	0
1143	277.7	0
1144	277.8	10.33
1145	277.9	55.3
1146	278	97.05
1147	278.1	119.36
1148	278.2	116.28
1149	278.3	88.47
1150	278.4	55.98
1151	278.5	36.48
1152	278.6	41.05
1153	278.7	69.32
1154	278.8	108.16
1155	278.9	151.64
1156	279	201.23
1157	279.1	233.68
1158	279.2	217.49
1159	279.3	143.42
1160	279.4	50.14
1161	279.5	0
1162	279.6	22.75
1163	279.7	87.98
1164	279.8	151.5
1165	279.9	170.56
1166	280	147.34
1167	280.1	94.52
1168	280.2	16.5
1169	280.3	0
1170	282.1	0
1171	282.2	37.35
1172	282.3	163.57
1173	282.4	333.86
1174	282.5	484.8
1175	282.6	704.12
1176	282.7	1098.26
1177	282.8	1564.08
1178	282.9	1838.02
1179	283	1769.4
1180	283.1	1417.57
1181	283.2	941.33
1182	283.3	469.87
1183	283.4	164.71
1184	283.5	29.8
1185	283.6	0
1186	283.7	9.34
1187	283.8	45.77
1188	283.9	81.49
1189	284	77.42
1190	284.1	37.85
1191	284.2	14.61
1192	284.3	41.6
1193	284.4	106.94
1194	284.5	188
1195	284.6	268.25
1196	284.7	332.78
1197	284.8	346.96
1198	284.9	313.08
1199	285	267.57
1200	285.1	233.34
1201	285.2	191.55
1202	285.3	133.78
1203	285.4	83.85
1204	285.5	62.9
1205	285.6	71.03
1206	285.7	90.02
1207	285.8	103.61
1208	285.9	98.91
1209	286	70.31
1210	286.1	44.05
1211	286.2	63.15
1212	286.3	198.01
1213	286.4	419.34
1214	286.5	662.52
1215	286.6	920.13
1216	286.7	1179.89
1217	286.8	1359.65
1218	286.9	1411.12
1219	287	1393.67
1220	287.1	1323.75
1221	287.2	1104.18
1222	287.3	714.32
1223	287.4	330.66
1224	287.5	143.4
1225	287.6	83.61
1226	287.7	104.68
1227	287.8	157.23
1228	287.9	174.81
1229	288	136.69
1230	288.1	65.67
1231	288.2	9.65
1232	288.3	0
1233	288.4	1.83
1234	288.5	21.61
1235	288.6	28.94
1236	288.7	17.35
1237	288.8	5.29
1238	288.9	10.29
1239	289	25.56
1240	289.1	31.21
1241	289.2	21.17
1242	289.3	7.07
1243	289.4	0.1
1244	289.5	0
1245	289.8	0
1246	289.9	10.11
1247	290	23.93
1248	290.1	31.92
1249	290.2	31.58
1250	290.3	29.53
1251	290.4	35.6
1252	290.5	49.1
1253	290.6	59.08
1254	290.7	59.46
1255	290.8	52.48
1256	290.9	39.07
1257	291	16.89
1258	291.1	0
1259	291.4	0
1260	291.5	56.67
1261	291.6	141.45
1262	291.7	214.43
1263	291.8	228.82
1264	291.9	174.86
1265	292	93.18
1266	292.1	34.14
1267	292.2	6.71
1268	292.3	0
1269	292.8	0
1270	292.9	2.27
1271	293	16.5
1272	293.1	5.51
1273	293.2	4.06
1274	293.3	59.58
1275	293.4	173.4
1276	293.5	279.48
1277	293.6	331.2
1278	293.7	355.45
1279	293.8	412.59
1280	293.9	507.99
1281	294	557.99
1282	294.1	478.92
1283	294.2	298.19
1284	294.3	115.93
1285	294.4	20.84
1286	294.5	0
1287	295.2	0
1288	295.3	2.66
1289	295.4	12.37
1290	295.5	19.99
1291	295.6	32.82
1292	295.7	55.83
1293	295.8	72.34
1294	295.9	59.21
1295	296	15.27
1296	296.1	0
1297	298.4	0
1298	298.5	87.67
1299	298.6	85.87
1300	298.7	68.63
1301	298.8	110.51
1302	298.9	165.14
1303	299	150.08
1304	299.1	51.08
1305	299.2	0
1306	299.5	0
1307	299.6	31.35
1308	299.7	48.04
1309	299.8	32.32
1310	299.9	4.7
1311	300	0
1312	300.1	3.19
1313	300.2	25.78
1314	300.3	40.29
1315	300.4	44.35
1316	300.5	39.45
1317	300.6	33.86
1318	300.7	33.41
1319	300.8	34.39
1320	300.9	36.07
1321	301	32.99
1322	301.1	24.15
1323	301.2	12.18
1324	301.3	3.55
1325	301.4	4.59
1326	301.5	12.45
1327	301.6	9.22
1328	301.7	0
1329	301.9	0
1330	302	2.61
1331	302.1	16.93
1332	302.2	16.63
1333	302.3	9.87
1334	302.4	2.67
1335	302.5	3.77
1336	302.6	15.76
1337	302.7	33.04
1338	302.8	42.99
1339	302.9	36.84
1340	303	20.68
1341	303.1	9.44
1342	303.2	10.19
1343	303.3	23.26
1344	303.4	41.35
1345	303.5	57.01
1346	303.6	74.11
1347	303.7	92.17
1348	303.8	108.03
1349	303.9	111.56
1350	304	95.95
1351	304.1	63.36
1352	304.2	23.4
1353	304.3	0
1354	304.4	0
1355	304.5	0.79
1356	304.6	16.64
1357	304.7	20.24
1358	304.8	11.22
1359	304.9	1.92
1360	305	1.4
1361	305.1	6.87
1362	305.2	9.65
1363	305.3	8.14
1364	305.4	17.06
1365	305.5	48.58
1366	305.6	71.03
1367	305.7	57.83
1368	305.8	14.03
1369	305.9	0
1370	306	11.45
1371	306.1	73.48
1372	306.2	130.21
1373	306.3	148.77
1374	306.4	136.79
1375	306.5	124.58
1376	306.6	132.1
1377	306.7	169.85
1378	306.8	246.02
1379	306.9	323.67
1380	307	340.51
1381	307.1	273.47
1382	307.2	181.79
1383	307.3	143.09
1384	307.4	195.05
1385	307.5	298.45
1386	307.6	391.5
1387	307.7	413.28
1388	307.8	376.51
1389	307.9	333.12
1390	308	302.82
1391	308.1	250.37
1392	308.2	157.68
1393	308.3	66.63
1394	308.4	15.59
1395	308.5	5.36
1396	308.6	21.71
1397	308.7	52.81
1398	308.8	75.56
1399	308.9	68.9
1400	309	37.84
1401	309.1	7.86
1402	309.2	0
1403	309.3	0.51
1404	309.4	10.91
1405	309.5	19.43
1406	309.6	19.79
1407	309.7	9.37
1408	309.8	0
1409	310.1	0
1410	310.2	0.63
1411	310.3	1.36
1412	310.4	3.77
1413	310.5	16.19
1414	310.6	29.07
1415	310.7	31.55
1416	310.8	24.1
1417	310.9	17.57
1418	311	17.33
1419	311.1	15.27
1420	311.2	16.01
1421	311.3	30.57
1422	311.4	53.44
1423	311.5	87.11
1424	311.6	130.7
1425	311.7	171.92
1426	311.8	191.48
1427	311.9	178.97
1428	312	143.73
1429	312.1	98.97
1430	312.2	47.85
1431	312.3	11.24
1432	312.4	0
1433	312.5	4.19
1434	312.6	11.94
1435	312.7	13.88
1436	312.8	7.88
1437	312.9	0
1438	313.1	0
1439	313.2	0.33
1440	313.3	2.28
1441	313.4	4.1
1442	313.5	13.64
1443	313.6	33.09
1444	313.7	51.34
1445	313.8	58.25
1446	313.9	56.07
1447	314	50.99
1448	314.1	42.22
1449	314.2	26.57
1450	314.3	6.41
1451	314.4	0
1452	314.7	0
1453	314.8	4.2
1454	314.9	13.35
1455	315	20.96
1456	315.1	20.37
1457	315.2	11.41
1458	315.3	0
1459	315.5	0
1460	315.6	23.51
1461	315.7	41.32
1462	315.8	34.74
1463	315.9	12.55
1464	316	0
1465	316.1	0
1466	316.2	3.93
1467	316.3	3.47
1468	316.4	0
1469	316.6	0
1470	316.7	1.85
1471	316.8	4.08
1472	316.9	5.27
1473	317	4.88
1474	317.1	3.26
1475	317.2	1.52
1476	317.3	0.38
1477	317.4	0
1478	317.5	0.48
1479	317.6	1.83
1480	317.7	3.67
1481	317.8	5.43
1482	317.9	6.93
1483	318	7.31
1484	318.1	9.04
1485	318.2	11.88
1486	318.3	15.85
1487	318.4	25.74
1488	318.5	43.59
1489	318.6	59.08
1490	318.7	57.2
1491	318.8	39.02
1492	318.9	19.3
1493	319	7.78
1494	319.1	3.79
1495	319.2	0.33
1496	319.3	0
1497	319.4	0.8
1498	319.5	5.98
1499	319.6	11.75
1500	319.7	13.88
1501	319.8	11.42
1502	319.9	9.69
1503	320	12.61
1504	320.1	17.7
1505	320.2	19.86
1506	320.3	22.1
1507	320.4	38.88
1508	320.5	75.03
1509	320.6	124.74
1510	320.7	173.41
1511	320.8	209.45
1512	320.9	225.65
1513	321	236.79
1514	321.1	238.77
1515	321.2	210.53
1516	321.3	147.67
1517	321.4	77.18
1518	321.5	36.48
1519	321.6	27.58
1520	321.7	29.03
1521	321.8	27.03
1522	321.9	21.4
1523	322	12.32
1524	322.1	0
1525	322.3	0
1526	322.4	9.88
1527	322.5	33.83
1528	322.6	41.26
1529	322.7	44.18
1530	322.8	56.17
1531	322.9	70.51
1532	323	71.05
1533	323.1	64.82
1534	323.2	79.86
1535	323.3	116.81
1536	323.4	161.25
1537	323.5	201.1
1538	323.6	241.96
1539	323.7	283.05
1540	323.8	309.64
1541	323.9	297.78
1542	324	240.46
1543	324.1	157.59
1544	324.2	82.5
1545	324.3	33.35
1546	324.4	9.45
1547	324.5	0
1548	324.6	0
1549	324.7	6.74
1550	324.8	14.64
1551	324.9	16.46
1552	325	8.83
1553	325.1	0
1554	325.3	0
1555	325.4	10.28
1556	325.5	39.47
1557	325.6	60.67
1558	325.7	63.44
1559	325.8	53.32
1560	325.9	42.22
1561	326	32.8
1562	326.1	22.4
1563	326.2	12.19
1564	326.3	6.88
1565	326.4	7.36
1566	326.5	10.99
1567	326.6	14.58
1568	326.7	15.66
1569	326.8	13.05
1570	326.9	20.25
1571	327	38.23
1572	327.1	53.5
1573	327.2	52.03
1574	327.3	37.91
1575	327.4	25.97
1576	327.5	22.6
1577	327.6	20.98
1578	327.7	14.97
1579	327.8	7.04
1580	327.9	2.07
1581	328	0.84
1582	328.1	0.61
1583	328.2	0
1584	328.3	0.09
1585	328.4	4.27
1586	328.5	14.54
1587	328.6	29.54
1588	328.7	41.2
1589	328.8	43.47
1590	328.9	35.45
1591	329	22.89
1592	329.1	12.77
1593	329.2	4.3
1594	329.3	1.86
1595	329.4	3.93
1596	329.5	10.13
1597	329.6	20.36
1598	329.7	32.89
1599	329.8	42.5
1600	329.9	41.23
1601	330	35.36
1602	330.1	29.68
1603	330.2	23.87
1604	330.3	14.37
1605	330.4	2.99
1606	330.5	0
1607	330.9	0
1608	331	0.55
1609	331.1	1.82
1610	331.2	4.49
1611	331.3	8.62
1612	331.4	13.22
1613	331.5	25.37
1614	331.6	46.42
1615	331.7	70.7
1616	331.8	84.16
1617	331.9	75.94
1618	332	56.07
1619	332.1	38.83
1620	332.2	30
1621	332.3	28.75
1622	332.4	48.29
1623	332.5	79.55
1624	332.6	89.14
1625	332.7	61.21
1626	332.8	18.37
1627	332.9	0
1628	333.2	0
1629	333.3	2.76
1630	333.4	9.26
1631	333.5	13
1632	333.6	8.56
1633	333.7	0
1634	333.8	0
1635	333.9	4.18
1636	334	16.89
1637	334.1	23.21
1638	334.2	21.59
1639	334.3	16.62
1640	334.4	7.85
1641	334.5	0
1642	335	0
1643	335.1	1.02
1644	335.2	5.02
1645	335.3	23.02
1646	335.4	63.41
1647	335.5	108.32
1648	335.6	118.28
1649	335.7	84.08
1650	335.8	41.55
1651	335.9	29.25
1652	336	48.32
1653	336.1	60.06
1654	336.2	49.38
1655	336.3	23.6
1656	336.4	1.59
1657	336.5	0
1658	336.6	0
1659	336.7	1.97
1660	336.8	3.59
1661	336.9	2.63
1662	337	4.89
1663	337.1	10.49
1664	337.2	15.59
1665	337.3	15.95
1666	337.4	14.55
1667	337.5	16.29
1668	337.6	20.45
1669	337.7	23.55
1670	337.8	18.02
1671	337.9	6.22
1672	338	0
1673	338.1	0
1674	338.2	0.38
1675	338.3	1.41
1676	338.4	0.5
1677	338.5	0
1678	338.7	0
1679	338.8	0.73
1680	338.9	3.38
1681	339	5.53
1682	339.1	6.36
1683	339.2	5.41
1684	339.3	3.29
1685	339.4	1.67
1686	339.5	1.47
1687	339.6	1.87
1688	339.7	1.8
1689	339.8	1.16
1690	339.9	0.31
1691	340	0
1692	340.6	0
1693	340.7	1.3
1694	340.8	8.44
1695	340.9	10.12
1696	341	4.39
1697	341.1	0
1698	341.3	0
1699	341.4	1.45
1700	341.5	0.85
1701	341.6	0
1702	341.7	1.34
1703	341.8	11.83
1704	341.9	27.46
1705	342	37.18
1706	342.1	32.82
1707	342.2	18.78
1708	342.3	6.69
1709	342.4	2.28
1710	342.5	1.41
1711	342.6	1.27
1712	342.7	0.53
1713	342.8	0
1714	343.1	0
1715	343.2	10.13
1716	343.3	30.31
1717	343.4	57.89
1718	343.5	71.04
1719	343.6	64.74
1720	343.7	52.34
1721	343.8	46.8
1722	343.9	43.97
1723	344	30.79
1724	344.1	16.44
1725	344.2	10.2
1726	344.3	6.34
1727	344.4	0
1728	344.5	0
1729	344.6	4.57
1730	344.7	28.59
1731	344.8	42.05
1732	344.9	33.47
1733	345	15.92
1734	345.1	8.68
1735	345.2	8.78
1736	345.3	16.98
1737	345.4	33.76
1738	345.5	46.86
1739	345.6	44.5
1740	345.7	30.12
1741	345.8	18.39
1742	345.9	16.05
1743	346	14.28
1744	346.1	9.13
1745	346.2	4.36
1746	346.3	1.77
1747	346.4	0
1748	346.6	0
1749	346.7	7.92
1750	346.8	23.92
1751	346.9	37.86
1752	347	39.14
1753	347.1	28.5
1754	347.2	17.37
1755	347.3	18.76
1756	347.4	30.18
1757	347.5	40.41
1758	347.6	39.01
1759	347.7	28.95
1760	347.8	20.3
1761	347.9	16.03
1762	348	12.06
1763	348.1	6.94
1764	348.2	4.21
1765	348.3	4.53
1766	348.4	3.9
1767	348.5	2
1768	348.6	0.28
1769	348.7	0
1770	348.9	0
1771	349	1.13
1772	349.1	4.14
1773	349.2	3.86
1774	349.3	1.83
1775	349.4	1.14
1776	349.5	2.07
1777	349.6	3.34
1778	349.7	6.07
1779	349.8	12.61
1780	349.9	20.32
1781	350	22.65
1782	350.1	17.77
1783	350.2	10.88
1784	350.3	6.74
1785	350.4	3.67
1786	350.5	0.69
1787	350.6	1.69
1788	350.7	8.65
1789	350.8	17.87
1790	350.9	21.65
1791	351	16.16
1792	351.1	6
1793	351.2	0
1794	351.6	0
1795	351.7	5.28
1796	351.8	13.34
1797	351.9	19.44
1798	352	18.67
1799	352.1	11.43
1800	352.2	3.64
1801	352.3	0.81
1802	352.4	3.03
1803	352.5	10.54
1804	352.6	20.63
1805	352.7	27.59
1806	352.8	26.18
1807	352.9	17.57
1808	353	7.96
1809	353.1	2.22
1810	353.2	1.55
1811	353.3	4.56
1812	353.4	7.55
1813	353.5	6.03
1814	353.6	0
1815	354	0
1816	354.1	4.46
1817	354.2	12.86
1818	354.3	13.22
1819	354.4	8.94
1820	354.5	0
1821	355.3	0
1822	355.4	4.39
1823	355.5	26.93
1824	355.6	58.19
1825	355.7	77.03
1826	355.8	68.7
1827	355.9	45.67
1828	356	35.82
1829	356.1	43.97
1830	356.2	54.99
1831	356.3	51.46
1832	356.4	34.44
1833	356.5	18.25
1834	356.6	11.81
1835	356.7	10.7
1836	356.8	16.31
1837	356.9	24.71
1838	357	26.56
1839	357.1	17.2
1840	357.2	3.2
1841	357.3	0
1842	357.4	8.7
1843	357.5	55.48
1844	357.6	149.33
1845	357.7	255.43
1846	357.8	315.31
1847	357.9	298.62
1848	358	231.61
1849	358.1	155.96
1850	358.2	83.72
1851	358.3	28.55
1852	358.4	3.84
1853	358.5	17.24
1854	358.6	63.2
1855	358.7	114.03
1856	358.8	138.96
1857	358.9	124.2
1858	359	88.15
1859	359.1	56.71
1860	359.2	34.49
1861	359.3	16.69
1862	359.4	7.05
1863	359.5	7.45
1864	359.6	13.03
1865	359.7	16.13
1866	359.8	16.97
1867	359.9	21.86
1868	360	29.9
1869	360.1	30.75
1870	360.2	17.41
1871	360.3	0
1872	360.6	0
1873	360.7	0.45
1874	360.8	9.82
1875	360.9	21.19
1876	361	31.7
1877	361.1	32.2
1878	361.2	20.8
1879	361.3	8.08
1880	361.4	3.44
1881	361.5	3.64
1882	361.6	1.71
1883	361.7	0
1884	362.1	0
1885	362.2	0.77
1886	362.3	2.08
1887	362.4	5.62
1888	362.5	11.4
1889	362.6	14.55
1890	362.7	12.82
1891	362.8	10.46
1892	362.9	11.8
1893	363	15.21
1894	363.1	16.16
1895	363.2	13.04
1896	363.3	7.79
1897	363.4	3.4
1898	363.5	1.66
1899	363.6	3.25
1900	363.7	8.5
1901	363.8	17.53
1902	363.9	25.11
1903	364	24.85
1904	364.1	17.75
1905	364.2	11.14
1906	364.3	8.78
1907	364.4	8.15
1908	364.5	17.14
1909	364.6	46.42
1910	364.7	92.84
1911	364.8	141.97
1912	364.9	163.75
1913	365	142.65
1914	365.1	90.29
1915	365.2	37
1916	365.3	6.85
1917	365.4	0
1918	365.5	0
1919	365.6	1.63
1920	365.7	3.46
1921	365.8	5.48
1922	365.9	9.03
1923	366	13.28
1924	366.1	12.81
1925	366.2	4.27
1926	366.3	0
1927	366.4	0
1928	366.5	3.48
1929	366.6	28.04
1930	366.7	56.41
1931	366.8	75.41
1932	366.9	75.8
1933	367	58.42
1934	367.1	33.11
1935	367.2	13.11
1936	367.3	4.08
1937	367.4	6.25
1938	367.5	11.17
1939	367.6	12.31
1940	367.7	9.99
1941	367.8	8.12
1942	367.9	8.33
1943	368	8.87
1944	368.1	7.23
1945	368.2	3.66
1946	368.3	1.65
1947	368.4	3.66
1948	368.5	7.36
1949	368.6	8.18
1950	368.7	3.14
1951	368.8	0
1952	369.5	0
1953	369.6	7.73
1954	369.7	13.85
1955	369.8	7.12
1956	369.9	0
1957	373.3	0
1958	373.4	18.65
1959	373.5	14.54
1960	373.6	7.01
1961	373.7	0
1962	374.5	0
1963	374.6	2.16
1964	374.7	6.37
1965	374.8	9.32
1966	374.9	9.04
1967	375	4.69
1968	375.1	0
1969	375.5	0
1970	375.6	5.42
1971	375.7	10.16
1972	375.8	11.64
1973	375.9	7.86
1974	376	0
1975	376.4	0
1976	376.5	8.78
1977	376.6	12.49
1978	376.7	11.7
1979	376.8	8.31
1980	376.9	6.26
1981	377	8.51
1982	377.1	13.27
1983	377.2	17.23
1984	377.3	20.41
1985	377.4	23.39
1986	377.5	23.18
1987	377.6	17.44
1988	377.7	9.79
1989	377.8	5.82
1990	377.9	6.27
1991	378	7.58
1992	378.1	7.26
1993	378.2	4.59
1994	378.3	0
1995	378.7	0
1996	378.8	6.86
1997	378.9	10.62
[truncated: 1,978 more rows]

## Sheet: Sheet3
+ESI Scan (rt: 2.61-2.91 min, 66 scans) Frag=100.0V CF=0.000 DF=0.000 4608-02.d Subtract
Index	X	Y
0	50	0
1	50.4	0
2	50.5	0.66
3	50.6	0.89
4	50.7	0.53
5	50.8	0.06
6	50.9	0
7	51.8	0
8	51.9	0.07
9	52	0.23
10	52.1	0.29
11	52.2	0.38
12	52.3	0.61
13	52.4	0.85
14	52.5	0.83
15	52.6	0.64
16	52.7	0.76
17	52.8	1.36
18	52.9	1.85
19	53	1.53
20	53.1	0.44
21	53.2	0
22	53.6	0
23	53.7	0.26
24	53.8	0.2
25	53.9	0.06
26	54	0
27	54.4	0
28	54.5	1.16
29	54.6	4.32
30	54.7	16.37
31	54.8	68.98
32	54.9	147.63
33	55	202.54
34	55.1	209.49
35	55.2	197.39
36	55.3	194.23
37	55.4	175.84
38	55.5	116.86
39	55.6	40.07
40	55.7	0
41	55.9	0
42	56	4.97
43	56.1	4.6
44	56.2	0
45	56.5	0
46	56.6	46.75
47	56.7	134.17
48	56.8	216.45
49	56.9	230.99
50	57	174.74
51	57.1	142.78
52	57.2	233.34
53	57.3	391.82
54	57.4	445.55
55	57.5	318.32
56	57.6	124.27
57	57.7	21.26
58	57.8	18.21
59	57.9	10.84
60	58	0
61	58.9	0
62	59	39.79
63	59.1	8.09
64	59.2	0
65	59.7	0
66	59.8	17.56
67	59.9	209.91
68	60	310.67
69	60.1	142.3
70	60.2	0
71	60.4	0
72	60.5	187.09
73	60.6	683.53
74	60.7	1672.36
75	60.8	3318.15
76	60.9	5242.94
77	61	6741.93
78	61.1	7605.88
79	61.2	8180.8
80	61.3	8414.68
81	61.4	7546.55
82	61.5	5222.96
83	61.6	2371.7
84	61.7	390.82
85	61.8	6.46
86	61.9	31.91
87	62	116.73
88	62.1	106.85
89	62.2	34.4
90	62.3	0
91	62.6	0
92	62.7	0.86
93	62.8	10.63
94	62.9	14.79
95	63	22.7
96	63.1	47.15
97	63.2	75.79
98	63.3	81.17
99	63.4	52.9
100	63.5	12.5
101	63.6	0
102	63.8	0
103	63.9	0.21
104	64	10.16
105	64.1	16.17
106	64.2	17.69
107	64.3	15.2
108	64.4	10.21
109	64.5	4.74
110	64.6	1.67
111	64.7	0.68
112	64.8	0.21
113	64.9	0
114	65.3	0
115	65.4	0.22
116	65.5	0.3
117	65.6	0.29
118	65.7	0.33
119	65.8	0.4
120	65.9	0.4
121	66	0.27
122	66.1	0.11
123	66.2	0.08
124	66.3	0.16
125	66.4	0.14
126	66.5	0
127	67.3	0
128	67.4	0.88
129	67.5	1.32
130	67.6	0.35
131	67.7	0
132	68.5	0
133	68.6	12.53
134	68.7	31.64
135	68.8	20.93
136	68.9	0
137	69	0
138	69.1	19.64
139	69.2	72.34
140	69.3	97.92
141	69.4	95.33
142	69.5	83.01
143	69.6	73.79
144	69.7	53.69
145	69.8	35.53
146	69.9	22.81
147	70	3.43
148	70.1	0
149	70.2	2.5
150	70.3	2.56
151	70.4	0
152	70.7	0
153	70.8	172.7
154	70.9	375.51
155	71	415.07
156	71.1	295.51
157	71.2	200.16
158	71.3	251.99
159	71.4	357.41
160	71.5	345.5
161	71.6	198.85
162	71.7	48.76
163	71.8	0
164	71.9	18.57
165	72	68.79
166	72.1	104.72
167	72.2	102.43
168	72.3	17.91
169	72.4	2.69
170	72.5	186.15
171	72.6	749.86
172	72.7	1349.7
173	72.8	1779.29
174	72.9	2186.04
175	73	2758.12
176	73.1	3396.6
177	73.2	3904.37
178	73.3	4181.56
179	73.4	3969.26
180	73.5	2912.67
181	73.6	1178.17
182	73.7	0
183	74.6	0
184	74.7	54.65
185	74.8	208.49
186	74.9	121.96
187	75	103.45
188	75.1	210.31
189	75.2	280.22
190	75.3	228.49
191	75.4	112.34
192	75.5	24.66
193	75.6	0
194	75.7	19.66
195	75.8	25.62
196	75.9	21.19
197	76	19.88
198	76.1	29.54
199	76.2	44.04
200	76.3	42.89
201	76.4	23.87
202	76.5	1.59
203	76.6	0
204	76.7	2.9
205	76.8	39.75
206	76.9	83.36
207	77	129.29
208	77.1	178.36
209	77.2	209.39
210	77.3	187.6
211	77.4	129.22
212	77.5	66.51
213	77.6	60.56
214	77.7	156.16
215	77.8	297.35
216	77.9	336.11
217	78	191.22
218	78.1	0
219	78.3	0
220	78.4	32.06
221	78.5	102.76
222	78.6	85.89
223	78.7	39.94
224	78.8	22.88
225	78.9	33.52
226	79	25.54
227	79.1	3.45
228	79.2	0
229	80.1	0
230	80.2	17.13
231	80.3	3
232	80.4	0
233	80.6	0
234	80.7	75.86
235	80.8	186.9
236	80.9	197.94
237	81	153.28
238	81.1	167.47
239	81.2	296.91
240	81.3	461.8
241	81.4	512.16
242	81.5	385.05
243	81.6	173.66
244	81.7	27.27
245	81.8	0
246	82.2	0
247	82.3	14.28
248	82.4	2.79
249	82.5	0
250	82.6	0
251	82.7	21.76
252	82.8	55.24
253	82.9	61.35
254	83	45.18
255	83.1	45.92
256	83.2	70.31
257	83.3	85.95
258	83.4	58.92
259	83.5	10.9
260	83.6	0
261	84.1	0
262	84.2	34.82
263	84.3	91.34
264	84.4	105.13
265	84.5	65.82
266	84.6	23.04
267	84.7	15.05
268	84.8	33.43
269	84.9	26.23
270	85	0
271	86.5	0
272	86.6	43.83
273	86.7	73.3
274	86.8	87.81
275	86.9	102.37
276	87	113.13
277	87.1	108.07
278	87.2	108.9
279	87.3	136.46
280	87.4	158.72
281	87.5	132.63
282	87.6	78.12
283	87.7	62.23
284	87.8	76.5
285	87.9	82.42
286	88	88.14
287	88.1	83.12
288	88.2	95.9
289	88.3	264.11
290	88.4	938.34
291	88.5	2727.48
292	88.6	6727.15
293	88.7	13984.1
294	88.8	24117.7
295	88.9	34328
296	89	41453.7
297	89.1	45121
298	89.2	46807.6
299	89.3	45638.9
300	89.4	38343.4
301	89.5	24752.9
302	89.6	10369
303	89.7	1356.74
304	89.8	0
305	89.9	201.56
306	90	1634.91
307	90.1	2326.88
308	90.2	2414.75
309	90.3	2142.34
310	90.4	1623.91
311	90.5	1022.7
312	90.6	526.12
313	90.7	234.39
314	90.8	126.02
315	90.9	159.31
316	91	276.98
317	91.1	389.33
318	91.2	433.68
319	91.3	403.86
320	91.4	318.37
321	91.5	198.16
322	91.6	68.74
323	91.7	0.53
324	91.8	0
325	91.9	6.63
326	92	25.8
327	92.1	41.2
328	92.2	48.27
329	92.3	44.25
330	92.4	20.92
331	92.5	0
332	93.7	0
333	93.8	20.2
334	93.9	15.26
335	94	0
336	94.1	0
337	94.2	1.57
338	94.3	18.12
339	94.4	17.87
340	94.5	7.64
341	94.6	6.36
342	94.7	35.21
343	94.8	90.09
344	94.9	143.82
345	95	159.65
346	95.1	131.09
347	95.2	87.59
348	95.3	36.28
349	95.4	0
350	96.6	0
351	96.7	141.5
352	96.8	168.53
353	96.9	79.55
354	97	0
355	97.1	0
356	97.2	32.15
357	97.3	137.39
358	97.4	175.81
359	97.5	125.17
360	97.6	46.5
361	97.7	0
362	97.8	0
363	97.9	6.59
364	98	100.6
365	98.1	191.99
366	98.2	205.46
367	98.3	142.1
368	98.4	121.38
369	98.5	274.21
370	98.6	453.67
371	98.7	370.86
372	98.8	41.65
373	98.9	0
374	99	25.57
375	99.1	517.93
376	99.2	875.19
377	99.3	818.41
378	99.4	465.99
379	99.5	144.91
380	99.6	24.43
381	99.7	50.1
382	99.8	45.89
383	99.9	45.26
384	100	112.47
385	100.1	161.53
386	100.2	160.08
387	100.3	106.91
388	100.4	60.05
389	100.5	60.05
390	100.6	127.02
391	100.7	204.19
392	100.8	252.46
393	100.9	252.24
394	101	209.18
395	101.1	185.23
396	101.2	267.39
397	101.3	438.22
398	101.4	527.97
399	101.5	384.76
400	101.6	56.86
401	101.7	0
402	102.4	0
403	102.5	0.93
404	102.6	155.07
405	102.7	322.74
406	102.8	329.97
407	102.9	194.47
408	103	173.1
409	103.1	377.88
410	103.2	606.07
411	103.3	599.3
412	103.4	367.14
413	103.5	119.19
414	103.6	35.35
415	103.7	26.06
416	103.8	24.72
417	103.9	23.51
418	104	4.26
419	104.1	0
420	104.4	0
421	104.5	30.81
422	104.6	74.1
423	104.7	113.96
424	104.8	158.3
425	104.9	222.86
426	105	285.43
427	105.1	313.93
428	105.2	296.77
429	105.3	248.96
430	105.4	188.99
431	105.5	134.82
432	105.6	88.52
433	105.7	65.63
434	105.8	40.58
435	105.9	13.54
436	106	4.74
437	106.1	8.52
438	106.2	10.57
439	106.3	5.86
440	106.4	0
441	107.2	0
442	107.3	62.78
443	107.4	66.75
444	107.5	19.9
445	107.6	1.59
446	107.7	23.43
447	107.8	0
448	108	0
449	108.1	0.09
450	108.2	72.64
451	108.3	78.65
452	108.4	29.6
453	108.5	0
454	109.6	0
455	109.7	6.04
456	109.8	20.53
457	109.9	30.23
458	110	26.02
459	110.1	11.23
460	110.2	6.84
461	110.3	14.24
462	110.4	25.11
463	110.5	17.65
464	110.6	30.93
465	110.7	96.83
466	110.8	153.17
467	110.9	140.84
468	111	80.52
469	111.1	52.22
470	111.2	89.59
471	111.3	147.26
472	111.4	166.97
473	111.5	141.29
474	111.6	86.62
475	111.7	35.73
476	111.8	32.29
477	111.9	53.84
478	112	84.24
479	112.1	79.82
480	112.2	40.24
481	112.3	18.12
482	112.4	49.34
483	112.5	111.8
484	112.6	117.52
485	112.7	41.53
486	112.8	0
487	112.9	0
488	113	2.26
489	113.1	99.03
490	113.2	183.68
491	113.3	235.75
492	113.4	218.45
493	113.5	148.12
494	113.6	58.79
495	113.7	0
496	114.3	0
497	114.4	98.97
498	114.5	226.36
499	114.6	297.93
500	114.7	420.25
501	114.8	605.04
502	114.9	742.97
503	115	761.33
504	115.1	731.38
505	115.2	725.01
506	115.3	677.53
507	115.4	519.87
508	115.5	345.37
509	115.6	274.03
510	115.7	277.4
511	115.8	314.29
512	115.9	358.56
513	116	422.1
514	116.1	499.82
515	116.2	522.98
516	116.3	462.97
517	116.4	341.05
518	116.5	185.26
519	116.6	52.33
520	116.7	8.67
521	116.8	105.34
522	116.9	239.28
523	117	271.28
524	117.1	202.04
525	117.2	159.39
526	117.3	198.8
527	117.4	221.38
528	117.5	152.22
529	117.6	29.48
530	117.7	0
531	117.9	0
532	118	23.92
533	118.1	32.13
534	118.2	26.18
535	118.3	7.84
536	118.4	2.64
537	118.5	19.29
538	118.6	40.31
539	118.7	47.06
540	118.8	31.93
541	118.9	0
542	119	0
543	119.1	12.84
544	119.2	80.28
545	119.3	119.31
546	119.4	86.1
547	119.5	13.62
548	119.6	0
549	120	0
550	120.1	6.07
551	120.2	42.35
552	120.3	156.75
553	120.4	339.8
554	120.5	589.14
555	120.6	908.13
556	120.7	1350.48
557	120.8	1853.11
558	120.9	2218.54
559	121	2328.07
560	121.1	2295.18
561	121.2	2238.81
562	121.3	2029.73
563	121.4	1510.5
564	121.5	865.81
565	121.6	498.17
566	121.7	624.36
567	121.8	1055.04
568	121.9	1524.64
569	122	1758.37
570	122.1	1672.02
571	122.2	1374.8
572	122.3	1003.58
573	122.4	626.96
574	122.5	299.2
575	122.6	96.07
576	122.7	50.3
577	122.8	133.89
578	122.9	251.29
579	123	301.98
580	123.1	275.2
581	123.2	208.79
582	123.3	137.39
583	123.4	57.73
584	123.5	0
585	123.9	0
586	124	2.96
587	124.1	32.83
588	124.2	27.15
589	124.3	0
590	124.7	0
591	124.8	2.23
592	124.9	58.63
593	125	113.01
594	125.1	121.93
595	125.2	79.79
596	125.3	20.84
597	125.4	0
598	126	0
599	126.1	3.87
600	126.2	28.42
601	126.3	38.69
602	126.4	20.75
603	126.5	2.02
604	126.6	33.9
605	126.7	117.06
606	126.8	194.02
607	126.9	211.13
608	127	162.66
609	127.1	78.02
610	127.2	0
611	127.4	0
612	127.5	1.15
613	127.6	6.5
614	127.7	0
615	127.8	1.49
616	127.9	23.57
617	128	39.5
618	128.1	36.85
619	128.2	25.5
620	128.3	23.54
621	128.4	20.78
622	128.5	22.25
623	128.6	58.72
624	128.7	136.34
625	128.8	189.65
626	128.9	120.89
627	129	0
628	129.7	0
629	129.8	124.88
630	129.9	668.13
631	130	1100.3
632	130.1	1300.08
633	130.2	1275.91
634	130.3	1120.11
635	130.4	865.77
636	130.5	571.74
637	130.6	351.37
638	130.7	242.35
639	130.8	256.28
640	130.9	389.38
641	131	555.49
642	131.1	589.06
643	131.2	427.29
644	131.3	204.88
645	131.4	78.84
646	131.5	55.1
647	131.6	44.51
648	131.7	0
649	132.1	0
650	132.2	33.88
651	132.3	62.18
652	132.4	54.96
653	132.5	49.48
654	132.6	59.01
655	132.7	100.12
656	132.8	159.55
657	132.9	224.32
658	133	285.4
659	133.1	324.15
660	133.2	314.99
661	133.3	236.86
662	133.4	116.66
663	133.5	15.82
664	133.6	0
665	134.3	0
666	134.4	53.56
667	134.5	99.63
668	134.6	111.57
669	134.7	109.23
670	134.8	118.14
671	134.9	122.08
672	135	80.31
673	135.1	5.5
674	135.2	0
675	135.3	0
676	135.4	19.22
677	135.5	57.8
678	135.6	58.63
679	135.7	64.72
680	135.8	74.46
681	135.9	64.27
682	136	46.93
683	136.1	47.55
684	136.2	82.24
685	136.3	142.12
686	136.4	222.1
687	136.5	355.19
688	136.6	670.35
689	136.7	1231.63
690	136.8	1929.58
691	136.9	2553.27
692	137	2934.76
693	137.1	3027.48
694	137.2	2862.1
695	137.3	2460.71
696	137.4	1832.82
697	137.5	1077.27
698	137.6	431.07
699	137.7	113.8
700	137.8	122.92
701	137.9	230.87
702	138	354.26
703	138.1	431.17
704	138.2	435.27
705	138.3	330.47
706	138.4	154.91
707	138.5	11.12
708	138.6	0
709	138.7	6.14
710	138.8	40.08
711	138.9	34.99
712	139	18.87
713	139.1	20.49
714	139.2	30.29
715	139.3	18.63
716	139.4	5.56
717	139.5	20.52
718	139.6	83.65
719	139.7	139.18
720	139.8	151.52
721	139.9	131.47
722	140	116.9
723	140.1	120.56
724	140.2	121.96
725	140.3	89.57
726	140.4	16.16
727	140.5	0
728	140.6	0
729	140.7	65.26
730	140.8	190.24
731	140.9	211.65
732	141	100.57
733	141.1	0
734	141.3	0
735	141.4	62.2
736	141.5	132.64
737	141.6	131.02
738	141.7	104.81
739	141.8	116.27
740	141.9	177.42
741	142	239.28
742	142.1	249.09
743	142.2	214.49
744	142.3	201.69
745	142.4	225.54
746	142.5	233.18
747	142.6	190.43
748	142.7	113.47
749	142.8	41.75
750	142.9	1.5
751	143	0
752	143.4	0
753	143.5	31.7
754	143.6	57.33
755	143.7	81.33
756	143.8	93.49
757	143.9	83.06
758	144	72.45
759	144.1	68.61
760	144.2	70.75
761	144.3	74.94
762	144.4	73.17
763	144.5	56.02
764	144.6	0
765	145.9	0
766	146	2.7
767	146.1	27.63
768	146.2	9.31
769	146.3	0
770	146.4	0
771	147.4	0
772	147.5	6.39
773	147.6	48.03
774	147.7	31.92
775	147.8	0
776	148	0
777	148.1	9.22
778	148.2	52.12
779	148.3	63.33
780	148.4	43.49
781	148.5	49
782	148.6	97.74
783	148.7	191.2
784	148.8	282.17
785	148.9	337.29
786	149	352.69
787	149.1	347.81
788	149.2	318.6
789	149.3	234.85
790	149.4	115.08
791	149.5	14.27
792	149.6	0
793	149.7	0
794	149.8	17.06
795	149.9	42.81
796	150	63.61
797	150.1	64.69
798	150.2	46.92
799	150.3	20.32
800	150.4	0
801	150.6	0
802	150.7	44.18
803	150.8	99.66
804	150.9	74.82
805	151	0
806	151.3	0
807	151.4	26.88
808	151.5	45.19
809	151.6	42.73
810	151.7	21.47
811	151.8	0.33
812	151.9	0
813	152.1	0
814	152.2	35.48
815	152.3	88.77
816	152.4	192.74
817	152.5	323.13
818	152.6	389.47
819	152.7	360.02
820	152.8	327.07
821	152.9	394.72
822	153	542.2
823	153.1	676.66
824	153.2	755.79
825	153.3	757.72
826	153.4	622.66
827	153.5	345.28
828	153.6	71.36
829	153.7	0
830	153.8	6.17
831	153.9	103.65
832	154	172.98
833	154.1	173.14
834	154.2	129.19
835	154.3	74.04
836	154.4	25.78
837	154.5	17.31
838	154.6	88.48
839	154.7	208.89
840	154.8	281.95
841	154.9	252.31
842	155	167.86
843	155.1	111.46
844	155.2	99.48
845	155.3	104.21
846	155.4	99.58
847	155.5	95.59
848	155.6	96.9
849	155.7	92.94
850	155.8	102.03
851	155.9	117.99
852	156	115.56
853	156.1	90.8
854	156.2	78.14
855	156.3	121.92
856	156.4	209.92
857	156.5	281.76
858	156.6	285.08
859	156.7	244.72
860	156.8	238.39
861	156.9	325.07
862	157	446.86
863	157.1	468.89
864	157.2	334.43
865	157.3	116.97
866	157.4	0
867	158.4	0
868	158.5	36.23
869	158.6	55.39
870	158.7	54.81
871	158.8	60.52
872	158.9	99.25
873	159	151.3
874	159.1	162.59
875	159.2	98.32
876	159.3	5.96
877	159.4	0
878	159.5	0
879	159.6	5.6
880	159.7	29.16
881	159.8	36.05
882	159.9	23.64
883	160	10.19
884	160.1	9.42
885	160.2	20.97
886	160.3	47.95
887	160.4	87.98
888	160.5	169.42
889	160.6	315.87
890	160.7	446.26
891	160.8	496.38
892	160.9	521.85
893	161	647.52
894	161.1	851.93
895	161.2	930.64
896	161.3	738.87
897	161.4	383.76
898	161.5	109.81
899	161.6	14.79
900	161.7	29.05
901	161.8	53.21
902	161.9	84.76
903	162	116.28
904	162.1	111.69
905	162.2	82.54
906	162.3	73.83
907	162.4	106.35
908	162.5	137.55
909	162.6	152.86
910	162.7	131.48
911	162.8	63.58
912	162.9	0
913	163.1	0
914	163.2	30.46
915	163.3	69.2
916	163.4	66.61
917	163.5	37.63
918	163.6	18.24
919	163.7	15.42
920	163.8	18.14
921	163.9	17.2
922	164	12.72
923	164.1	7.28
924	164.2	6.61
925	164.3	15.17
926	164.4	27.27
927	164.5	29.39
928	164.6	14.12
929	164.7	0
930	165.4	0
931	165.5	1.7
932	165.6	15.14
933	165.7	10.55
934	165.8	1.43
935	165.9	0
936	166.3	0
937	166.4	3.68
938	166.5	16.6
939	166.6	40.61
940	166.7	87.93
941	166.8	148.4
942	166.9	187.87
943	167	168.95
944	167.1	109.81
945	167.2	57.21
946	167.3	31.26
947	167.4	28.45
948	167.5	31.62
949	167.6	42.5
950	167.7	50.22
951	167.8	40.14
952	167.9	11.8
953	168	0
954	168.2	0
955	168.3	12.7
956	168.4	0.98
957	168.5	0
958	168.8	0
959	168.9	4.44
960	169	33.09
961	169.1	30.99
962	169.2	0
963	169.6	0
964	169.7	33.24
965	169.8	72.61
966	169.9	83.22
967	170	63.71
968	170.1	45.49
969	170.2	46.04
970	170.3	63.54
971	170.4	72.41
972	170.5	76.57
973	170.6	104.39
974	170.7	167.47
975	170.8	262.24
976	170.9	374.98
977	171	490.63
978	171.1	557.04
979	171.2	509.26
980	171.3	338.45
981	171.4	130.63
982	171.5	0
983	171.6	0
984	171.7	26.91
985	171.8	36.03
986	171.9	0
987	172.3	0
988	172.4	44.4
989	172.5	90.35
990	172.6	126.65
991	172.7	124
992	172.8	76.57
993	172.9	11.01
994	173	0
995	175.3	0
996	175.4	14.68
997	175.5	0
998	176.1	0
999	176.2	9.25
1000	176.3	92.86
1001	176.4	156.66
1002	176.5	122.08
1003	176.6	0
1004	178.5	0
1005	178.6	20.89
1006	178.7	51.67
1007	178.8	45.16
1008	178.9	0
1009	180.3	0
1010	180.4	3.24
1011	180.5	51.53
1012	180.6	87.95
1013	180.7	64.92
1014	180.8	0
1015	181.5	0
1016	181.6	5.28
1017	181.7	15.83
1018	181.8	32.06
1019	181.9	55.42
1020	182	70.52
1021	182.1	63.97
1022	182.2	47.52
1023	182.3	43.16
1024	182.4	63.34
1025	182.5	105.2
1026	182.6	155.98
1027	182.7	161.7
1028	182.8	94.12
1029	182.9	0
1030	183.1	0
1031	183.2	10.8
1032	183.3	19.23
1033	183.4	0
1034	183.7	0
1035	183.8	5.67
1036	183.9	12.2
1037	184	0
1038	184.3	0
1039	184.4	9.19
1040	184.5	20.46
1041	184.6	0
1042	184.9	0
1043	185	51.24
1044	185.1	87.4
1045	185.2	74
1046	185.3	31.28
1047	185.4	0
1048	185.5	0
1049	185.6	12.97
1050	185.7	62.39
1051	185.8	126.29
1052	185.9	175.59
1053	186	180.19
1054	186.1	136.58
1055	186.2	78.42
1056	186.3	38.81
1057	186.4	21.15
1058	186.5	0
1059	186.8	0
1060	186.9	92.03
1061	187	222.78
1062	187.1	279.45
1063	187.2	261.36
1064	187.3	188.86
1065	187.4	91.12
1066	187.5	20.1
1067	187.6	0
1068	187.7	8.08
1069	187.8	32.11
1070	187.9	33.21
1071	188	3.57
1072	188.1	0
1073	188.3	0
1074	188.4	36.59
1075	188.5	121.83
1076	188.6	152.64
1077	188.7	130.78
1078	188.8	96.03
1079	188.9	59.19
1080	189	15.03
1081	189.1	0
1082	189.2	18.45
1083	189.3	67.52
1084	189.4	81
1085	189.5	47.77
1086	189.6	0
1087	189.7	0
1088	189.8	57.86
1089	189.9	118.78
1090	190	108.36
1091	190.1	59.69
1092	190.2	36.89
1093	190.3	21.21
1094	190.4	0
1095	190.7	0
1096	190.8	132.03
1097	190.9	140.42
1098	191	6.49
1099	191.1	0
1100	194.2	0
1101	194.3	27.34
1102	194.4	6.14
1103	194.5	0
1104	194.7	0
1105	194.8	61.17
1106	194.9	114.89
1107	195	102.42
1108	195.1	57.32
1109	195.2	26.02
1110	195.3	8.03
1111	195.4	0
1112	196.1	0
1113	196.2	17.65
1114	196.3	43.78
1115	196.4	56.67
1116	196.5	56.12
1117	196.6	51.69
1118	196.7	51.82
1119	196.8	66.96
1120	196.9	93.93
1121	197	116.42
1122	197.1	114.63
1123	197.2	98.67
1124	197.3	74.24
1125	197.4	46.24
1126	197.5	16.64
1127	197.6	6.15
1128	197.7	27.6
1129	197.8	57.97
1130	197.9	55.34
1131	198	26.49
1132	198.1	11.83
1133	198.2	41.88
1134	198.3	90.62
1135	198.4	88.4
1136	198.5	40.85
1137	198.6	6.5
1138	198.7	19.19
1139	198.8	58.21
1140	198.9	112.31
1141	199	161.64
1142	199.1	174.57
1143	199.2	118.37
1144	199.3	35.56
1145	199.4	0
1146	199.5	0
1147	199.6	0.21
1148	199.7	24.3
1149	199.8	51.64
1150	199.9	67.38
1151	200	62.96
1152	200.1	45.6
1153	200.2	32.53
1154	200.3	19.44
1155	200.4	0
1156	200.5	0
1157	200.6	23.74
1158	200.7	57.54
1159	200.8	67.32
1160	200.9	71.74
1161	201	87.42
1162	201.1	87.79
1163	201.2	52.89
1164	201.3	9.94
1165	201.4	0
1166	201.5	0
1167	201.6	0.5
1168	201.7	27.27
1169	201.8	66.28
1170	201.9	104.12
1171	202	114.65
1172	202.1	96.59
1173	202.2	53.03
1174	202.3	5.3
1175	202.4	0
1176	202.6	0
1177	202.7	2.29
1178	202.8	32.27
1179	202.9	61.61
1180	203	83.96
1181	203.1	80.16
1182	203.2	39.35
1183	203.3	0
1184	204.1	0
1185	204.2	32.28
1186	204.3	152.67
1187	204.4	265.44
1188	204.5	292.49
1189	204.6	296.52
1190	204.7	373.98
1191	204.8	529.75
1192	204.9	635.61
1193	205	633.95
1194	205.1	593.72
1195	205.2	554.9
1196	205.3	458.62
1197	205.4	256.15
1198	205.5	45.48
1199	205.6	0
1200	206.1	0
1201	206.2	7.83
1202	206.3	28.8
1203	206.4	115.92
1204	206.5	257.46
1205	206.6	427.33
1206	206.7	577.06
1207	206.8	734.01
1208	206.9	920.97
1209	207	1097.16
1210	207.1	1149.07
1211	207.2	996.45
1212	207.3	690.61
1213	207.4	373.57
1214	207.5	151.12
1215	207.6	45.2
1216	207.7	0
1217	208.1	0
1218	208.2	43.73
1219	208.3	96.19
1220	208.4	123.09
1221	208.5	166.34
1222	208.6	241.12
1223	208.7	336.62
1224	208.8	369.89
1225	208.9	311.85
1226	209	224.65
1227	209.1	190.43
1228	209.2	203.25
1229	209.3	195.39
1230	209.4	124.66
1231	209.5	31.93
1232	209.6	0
1233	209.7	0
1234	209.8	36.15
1235	209.9	75.03
1236	210	83.55
1237	210.1	59.86
1238	210.2	26.67
1239	210.3	1.17
1240	210.4	0
1241	210.5	18.08
1242	210.6	40.87
1243	210.7	52.08
1244	210.8	35.75
1245	210.9	0
1246	211.3	0
1247	211.4	9.28
1248	211.5	2.76
1249	211.6	0
1250	212.8	0
1251	212.9	46.06
1252	213	87.33
1253	213.1	91.45
1254	213.2	58.24
1255	213.3	19.42
1256	213.4	8.23
1257	213.5	7.21
1258	213.6	0
1259	214.2	0
1260	214.3	3.88
1261	214.4	25.42
1262	214.5	42.12
1263	214.6	54.56
1264	214.7	60.31
1265	214.8	72.66
1266	214.9	100.87
1267	215	140.31
1268	215.1	163.11
1269	215.2	149.02
1270	215.3	98.97
1271	215.4	26.16
1272	215.5	0
1273	217.7	0
1274	217.8	44.55
1275	217.9	10.22
1276	218	0
1277	218.7	0
1278	218.8	39.87
1279	218.9	130.15
1280	219	106.72
1281	219.1	2.26
1282	219.2	0
1283	219.5	0
1284	219.6	32.23
1285	219.7	27.89
1286	219.8	0
1287	220.1	0
1288	220.2	67.19
1289	220.3	167.17
1290	220.4	264.99
1291	220.5	301.39
1292	220.6	288.84
1293	220.7	303.49
1294	220.8	415.78
1295	220.9	617.24
1296	221	855.45
1297	221.1	1046.65
1298	221.2	1064.88
1299	221.3	827.48
1300	221.4	437.62
1301	221.5	107.62
1302	221.6	0
1303	221.7	21.4
1304	221.8	69.36
1305	221.9	112.92
1306	222	125.27
1307	222.1	125.39
1308	222.2	157.25
1309	222.3	404
1310	222.4	851.22
1311	222.5	1356.9
1312	222.6	1837.35
1313	222.7	2358.5
1314	222.8	2948.99
1315	222.9	3413.36
1316	223	3481.72
1317	223.1	3076.92
1318	223.2	2320.9
1319	223.3	1399.92
1320	223.4	549.74
1321	223.5	35.03
1322	223.6	0
1323	223.7	148.38
1324	223.8	428.14
1325	223.9	644.94
1326	224	736.78
1327	224.1	679.27
1328	224.2	502.06
1329	224.3	302.7
1330	224.4	166
1331	224.5	189.69
1332	224.6	421.11
1333	224.7	765.27
1334	224.8	991.59
1335	224.9	951.91
1336	225	749.79
1337	225.1	552.27
1338	225.2	413.54
1339	225.3	280.8
1340	225.4	153.78
1341	225.5	73.01
1342	225.6	14.87
1343	225.7	16.03
1344	225.8	53.61
1345	225.9	67.92
1346	226	43.43
1347	226.1	21.36
1348	226.2	28.82
1349	226.3	39.48
1350	226.4	21.73
1351	226.5	0
1352	226.7	0
1353	226.8	15.56
1354	226.9	48.17
1355	227	69.17
1356	227.1	68.15
1357	227.2	45.1
1358	227.3	16.45
1359	227.4	1.05
1360	227.5	1.22
1361	227.6	10.9
1362	227.7	24.82
1363	227.8	37.26
1364	227.9	36.54
1365	228	26.01
1366	228.1	23.09
1367	228.2	31.51
1368	228.3	40.95
1369	228.4	44.75
1370	228.5	57.81
1371	228.6	88.26
1372	228.7	114.89
1373	228.8	117.92
1374	228.9	97.46
1375	229	63.13
1376	229.1	31.3
1377	229.2	9.63
1378	229.3	2.49
1379	229.4	6.18
1380	229.5	11.74
1381	229.6	16.41
1382	229.7	36.93
1383	229.8	61.19
1384	229.9	60.39
1385	230	27.62
1386	230.1	0
1387	231.8	0
1388	231.9	24.02
1389	232	33.46
1390	232.1	0
1391	232.3	0
1392	232.4	10.07
1393	232.5	20.72
1394	232.6	10.33
1395	232.7	9.81
1396	232.8	24.87
1397	232.9	7.05
1398	233	0
1399	234.2	0
1400	234.3	26.16
1401	234.4	44.52
1402	234.5	28.92
1403	234.6	7.48
1404	234.7	6.62
1405	234.8	23.76
1406	234.9	31.49
1407	235	29.36
1408	235.1	26.97
1409	235.2	29
1410	235.3	30.74
1411	235.4	24.1
1412	235.5	15.51
1413	235.6	10.29
1414	235.7	6.41
1415	235.8	7.09
1416	235.9	13.83
1417	236	16.21
1418	236.1	20.16
1419	236.2	36.79
1420	236.3	96.95
1421	236.4	214.64
1422	236.5	369.67
1423	236.6	535.05
1424	236.7	707.36
1425	236.8	887.81
1426	236.9	1037.32
1427	237	1096.99
1428	237.1	1016
1429	237.2	787.97
1430	237.3	471.32
1431	237.4	191.94
1432	237.5	47.66
1433	237.6	26.08
1434	237.7	46.65
1435	237.8	59.1
1436	237.9	71.44
1437	238	82.97
1438	238.1	78.62
1439	238.2	48.57
1440	238.3	20.22
1441	238.4	25.12
1442	238.5	49.49
1443	238.6	67.14
1444	238.7	70.97
1445	238.8	67.95
1446	238.9	62.77
1447	239	49.09
1448	239.1	27.7
1449	239.2	9.58
1450	239.3	2.31
1451	239.4	2.13
1452	239.5	0
1453	239.8	0
1454	239.9	1.85
1455	240	15.14
1456	240.1	22.73
1457	240.2	18.45
1458	240.3	6.22
1459	240.4	0
1460	240.5	2.8
1461	240.6	35.91
1462	240.7	92.15
1463	240.8	136.54
1464	240.9	124.24
1465	241	54.79
1466	241.1	0
1467	242.3	0
1468	242.4	8.56
1469	242.5	15.85
1470	242.6	11.3
1471	242.7	0
1472	243.6	0
1473	243.7	6.81
1474	243.8	9.96
1475	243.9	5.87
1476	244	1.1
1477	244.1	0
1478	244.5	0
1479	244.6	13.04
1480	244.7	17.94
1481	244.8	0
1482	245	0
1483	245.1	52.99
1484	245.2	81.18
1485	245.3	58.53
1486	245.4	18.28
1487	245.5	0
1488	247.3	0
1489	247.4	89.89
1490	247.5	134.23
1491	247.6	130.45
1492	247.7	72.5
1493	247.8	0
1494	248.3	0
1495	248.4	46.16
1496	248.5	98.96
1497	248.6	113.87
1498	248.7	114.85
1499	248.8	117.49
1500	248.9	112.39
1501	249	76.99
1502	249.1	16.28
1503	249.2	0
1504	249.4	0
1505	249.5	27.57
1506	249.6	51.31
1507	249.7	52.24
1508	249.8	30.75
1509	249.9	8.28
1510	250	1.28
1511	250.1	6.34
1512	250.2	8.95
1513	250.3	0
1514	250.8	0
1515	250.9	2.99
1516	251	7.11
1517	251.1	9.52
1518	251.2	12.18
1519	251.3	9.68
1520	251.4	3.62
1521	251.5	0
1522	251.6	0
1523	251.7	2.26
1524	251.8	10.05
1525	251.9	13.83
1526	252	14.92
1527	252.1	14.93
1528	252.2	5.59
1529	252.3	0
1530	252.6	0
1531	252.7	24.3
1532	252.8	64.91
1533	252.9	86.13
1534	253	80.51
1535	253.1	56.47
1536	253.2	32.04
1537	253.3	20.11
1538	253.4	19.9
1539	253.5	21.94
1540	253.6	19.52
1541	253.7	8.57
1542	253.8	0
1543	254	0
1544	254.1	1.42
1545	254.2	0.71
1546	254.3	0
1547	255.1	0
1548	255.2	15.12
1549	255.3	29.73
1550	255.4	14.56
1551	255.5	0
1552	255.7	0
1553	255.8	16.67
1554	255.9	32.03
1555	256	33.04
1556	256.1	32.08
1557	256.2	39.78
1558	256.3	42.49
1559	256.4	34.01
1560	256.5	21.68
1561	256.6	22.53
1562	256.7	34.9
1563	256.8	36.73
1564	256.9	22.87
1565	257	8.09
1566	257.1	7.68
1567	257.2	16.55
1568	257.3	20.12
1569	257.4	16.28
1570	257.5	9.9
1571	257.6	5.53
1572	257.7	3.61
1573	257.8	2.82
1574	257.9	3.47
1575	258	5.26
1576	258.1	8.42
1577	258.2	13.24
1578	258.3	18.78
1579	258.4	21.6
1580	258.5	20.25
1581	258.6	11.39
1582	258.7	0
1583	259.3	0
1584	259.4	6.16
1585	259.5	9.69
1586	259.6	2.44
1587	259.7	0
1588	260.2	0
1589	260.3	0.13
1590	260.4	14.9
1591	260.5	30.79
1592	260.6	48.73
1593	260.7	67.42
1594	260.8	83.9
1595	260.9	100.31
1596	261	108.15
1597	261.1	103.48
1598	261.2	90.29
1599	261.3	74.77
1600	261.4	54.02
1601	261.5	20
1602	261.6	0
1603	261.8	0
1604	261.9	12.66
1605	262	26.45
1606	262.1	26.85
1607	262.2	6.57
1608	262.3	0
1609	262.8	0
1610	262.9	15.02
1611	263	3.15
1612	263.1	0
1613	263.8	0
1614	263.9	15.11
1615	264	23.99
1616	264.1	13.3
1617	264.2	0
1618	264.5	0
1619	264.6	7.45
1620	264.7	24.57
1621	264.8	41.7
1622	264.9	46.35
1623	265	36.59
1624	265.1	22.94
1625	265.2	13.83
1626	265.3	7
1627	265.4	0.1
1628	265.5	0
1629	265.8	0
1630	265.9	2.61
1631	266	11.26
1632	266.1	9.51
1633	266.2	2.79
1634	266.3	1.11
1635	266.4	3.62
1636	266.5	3.85
1637	266.6	6.14
1638	266.7	28.83
1639	266.8	63.16
1640	266.9	81.11
1641	267	66.67
1642	267.1	36.19
1643	267.2	16.61
1644	267.3	8.96
1645	267.4	4.14
1646	267.5	0.8
1647	267.6	3.58
1648	267.7	11.02
1649	267.8	16.66
1650	267.9	16.04
1651	268	12.51
1652	268.1	10.54
1653	268.2	5.74
1654	268.3	0
1655	268.5	0
1656	268.6	22.64
1657	268.7	48
1658	268.8	48.98
1659	268.9	23.46
1660	269	0
1661	269.1	0.82
1662	269.2	15.26
1663	269.3	22.45
1664	269.4	12.73
1665	269.5	0
1666	269.6	0
1667	269.7	9.95
1668	269.8	18.35
1669	269.9	16.02
1670	270	9.33
1671	270.1	7.32
1672	270.2	11.03
1673	270.3	14.8
1674	270.4	25.82
1675	270.5	39
1676	270.6	36.46
1677	270.7	11.61
1678	270.8	0
1679	270.9	0
1680	271	6.88
1681	271.1	40.97
1682	271.2	55.19
1683	271.3	45.03
1684	271.4	24.32
1685	271.5	8.45
1686	271.6	2.77
1687	271.7	3.54
1688	271.8	11.17
1689	271.9	16.15
1690	272	10.04
1691	272.1	0
1692	272.3	0
1693	272.4	12.07
1694	272.5	31.72
1695	272.6	39.99
1696	272.7	28.42
1697	272.8	1.16
1698	272.9	0
1699	273.1	0
1700	273.2	10.93
1701	273.3	10.63
1702	273.4	4.85
1703	273.5	2.95
1704	273.6	9.42
1705	273.7	16.96
1706	273.8	15.99
1707	273.9	3.39
1708	274	0
1709	274.2	0
1710	274.3	1.61
1711	274.4	11.08
1712	274.5	11.41
1713	274.6	4.59
1714	274.7	0
1715	274.9	0
1716	275	2.29
1717	275.1	8.78
1718	275.2	14.92
1719	275.3	19.38
1720	275.4	22.16
1721	275.5	20.26
1722	275.6	6.58
1723	275.7	0
1724	275.8	0
1725	275.9	0.63
1726	276	16.34
1727	276.1	8.79
1728	276.2	0
1729	277	0
1730	277.1	7.04
1731	277.2	14.54
1732	277.3	15.74
1733	277.4	15.14
1734	277.5	16.17
1735	277.6	19.49
1736	277.7	26.82
1737	277.8	36.4
1738	277.9	42.77
1739	278	37.54
1740	278.1	21.28
1741	278.2	6.4
1742	278.3	4.6
1743	278.4	16.01
1744	278.5	28.92
1745	278.6	31.79
1746	278.7	22.81
1747	278.8	8.43
1748	278.9	0
1749	279.7	0
1750	279.8	0.51
1751	279.9	14.08
1752	280	20.7
1753	280.1	9.89
1754	280.2	0
1755	280.3	35.04
1756	280.4	128.39
1757	280.5	283.61
1758	280.6	469.37
1759	280.7	653.22
1760	280.8	811.7
1761	280.9	924.33
1762	281	987.91
1763	281.1	993.94
1764	281.2	904.58
1765	281.3	679.83
1766	281.4	381.41
1767	281.5	132
1768	281.6	44.07
1769	281.7	55.05
1770	281.8	98.89
1771	281.9	136.61
1772	282	163.34
1773	282.1	156.04
1774	282.2	108.37
1775	282.3	51.11
1776	282.4	28.81
1777	282.5	63.26
1778	282.6	126.86
1779	282.7	163.28
1780	282.8	142.66
1781	282.9	86.81
1782	283	48.1
1783	283.1	43.15
1784	283.2	39.31
1785	283.3	15.65
1786	283.4	0
1787	283.5	4.61
1788	283.6	30.08
1789	283.7	41.41
1790	283.8	32.48
1791	283.9	16.4
1792	284	10.42
1793	284.1	10.83
1794	284.2	8
1795	284.3	3.04
1796	284.4	0.32
1797	284.5	0
1798	284.7	0
1799	284.8	7.66
1800	284.9	18.21
1801	285	7.75
1802	285.1	0
1803	285.2	0
1804	285.3	6.59
1805	285.4	21.85
1806	285.5	19.66
1807	285.6	8.42
1808	285.7	0.23
1809	285.8	0
1810	285.9	1.33
1811	286	6.22
1812	286.1	8.61
1813	286.2	5.57
1814	286.3	0
1815	286.6	0
1816	286.7	6.56
1817	286.8	29.5
1818	286.9	27.15
1819	287	3.82
1820	287.1	0
1821	287.3	0
1822	287.4	0.62
1823	287.5	7.12
1824	287.6	9.38
1825	287.7	1.69
1826	287.8	0
1827	287.9	0
1828	288	2.27
1829	288.1	13.15
1830	288.2	15.1
1831	288.3	10.22
1832	288.4	4.53
1833	288.5	1.53
1834	288.6	0.14
1835	288.7	2.58
1836	288.8	12.65
1837	288.9	27.36
1838	289	36.01
1839	289.1	30.84
1840	289.2	16.93
1841	289.3	5.77
1842	289.4	0.83
1843	289.5	0
1844	289.9	0
1845	290	7.69
1846	290.1	15.55
1847	290.2	14.72
1848	290.3	9.15
1849	290.4	1.08
1850	290.5	0
1851	290.6	0
1852	290.7	2.05
1853	290.8	8.15
1854	290.9	10.79
1855	291	9.76
1856	291.1	6.03
1857	291.2	0
1858	291.7	0
1859	291.8	23.49
1860	291.9	48.94
1861	292	59.67
1862	292.1	65.71
1863	292.2	63.31
1864	292.3	45.9
1865	292.4	30.43
1866	292.5	24.71
1867	292.6	17.82
1868	292.7	12.4
1869	292.8	8.69
1870	292.9	12.41
1871	293	20.24
1872	293.1	19.75
1873	293.2	12.08
1874	293.3	2.13
1875	293.4	0
1876	293.5	0.62
1877	293.6	0
1878	293.9	0
1879	294	2.46
1880	294.1	1.14
1881	294.2	0
1882	294.9	0
1883	295	0.98
1884	295.1	6.77
1885	295.2	5.12
1886	295.3	0
1887	295.6	0
1888	295.7	4.95
1889	295.8	6.71
1890	295.9	8.9
1891	296	13.04
1892	296.1	25.56
1893	296.2	89.66
1894	296.3	277.98
1895	296.4	565.33
1896	296.5	872.51
1897	296.6	1155.98
1898	296.7	1483.62
1899	296.8	1922.89
1900	296.9	2409.48
1901	297	2721.67
1902	297.1	2645.07
1903	297.2	2187.25
1904	297.3	1574.03
1905	297.4	1033.53
1906	297.5	675.31
1907	297.6	526.88
1908	297.7	617.93
1909	297.8	682.63
1910	297.9	599.82
1911	298	440.75
1912	298.1	358.78
1913	298.2	365.35
1914	298.3	356.9
1915	298.4	302.48
1916	298.5	218.71
1917	298.6	108.29
1918	298.7	36.88
1919	298.8	88.93
1920	298.9	267.21
1921	299	440.68
1922	299.1	473.39
1923	299.2	363.78
1924	299.3	221.41
1925	299.4	147.51
1926	299.5	174.91
1927	299.6	267.37
1928	299.7	317.32
1929	299.8	244.62
1930	299.9	114.02
1931	300	30.68
1932	300.1	22.51
1933	300.2	43.22
1934	300.3	36.46
1935	300.4	7.15
1936	300.5	0
1937	300.6	13.38
1938	300.7	26.1
1939	300.8	24.5
1940	300.9	17.01
1941	301	14.07
1942	301.1	9.56
1943	301.2	0
1944	301.5	0
1945	301.6	1.16
1946	301.7	0.01
1947	301.8	0
1948	302.6	0
1949	302.7	22.96
1950	302.8	47.64
1951	302.9	48.97
1952	303	27.82
1953	303.1	2.92
1954	303.2	0
1955	303.3	0
1956	303.4	0.4
1957	303.5	10.49
1958	303.6	14.33
1959	303.7	9.97
1960	303.8	0.91
1961	303.9	0
1962	304.4	0
1963	304.5	7.3
1964	304.6	15.89
1965	304.7	21.98
1966	304.8	24.73
1967	304.9	27.05
1968	305	27.45
1969	305.1	24.39
1970	305.2	20.49
1971	305.3	20.75
1972	305.4	23.83
1973	305.5	22.39
1974	305.6	15.97
1975	305.7	6.72
1976	305.8	0
1977	306.3	0
1978	306.4	2.7
1979	306.5	6.92
1980	306.6	8.94
1981	306.7	5.15
1982	306.8	0
1983	307.6	0
1984	307.7	6.96
1985	307.8	19.66
1986	307.9	25.21
1987	308	17.54
1988	308.1	3.52
1989	308.2	0
1990	308.3	0
1991	308.4	7.13
1992	308.5	12.58
1993	308.6	11.28
1994	308.7	1.46
1995	308.8	0
1996	309.3	0
1997	309.4	2.26
[truncated: 2,067 more rows]

## Sheet: Sheet4
+ESI Scan (rt: 2.91-3.13 min, 48 scans) Frag=100.0V CF=0.000 DF=0.000 4608-02.d Subtract
Index	X	Y
0	50	0.96
1	50.1	0.44
2	50.2	0.3
3	50.3	0.72
4	50.4	1.07
5	50.5	0.8
6	50.6	0.16
7	50.7	0
8	50.8	0.35
9	50.9	0.83
10	51	0.83
11	51.1	0.51
12	51.2	0.32
13	51.3	0.38
14	51.4	0.5
15	51.5	0.44
16	51.6	0.14
17	51.7	0
18	51.9	0
19	52	0.03
20	52.1	0
21	52.2	0
22	52.3	0
23	52.4	0.1
24	52.5	0.58
25	52.6	0.8
26	52.7	0.68
27	52.8	0.63
28	52.9	0.94
29	53	1.32
30	53.1	1.17
31	53.2	0.4
32	53.3	0
33	53.6	0
34	53.7	0.24
35	53.8	0.26
36	53.9	0
37	54.5	0
38	54.6	1.93
39	54.7	37.51
40	54.8	94.5
41	54.9	128.62
42	55	113.52
43	55.1	37.46
44	55.2	0
45	55.4	0
46	55.5	18.71
47	55.6	54.7
48	55.7	33.11
49	55.8	16.27
50	55.9	5.73
51	56	0
52	56.4	0
53	56.5	12.05
54	56.6	1.51
55	56.7	0
56	56.9	0
57	57	30.44
58	57.1	8
59	57.2	0
60	57.6	0
61	57.7	1.28
62	57.8	4.86
63	57.9	26.62
64	58	36.13
65	58.1	29.61
66	58.2	43.68
67	58.3	110.93
68	58.4	189.75
69	58.5	170.5
70	58.6	44.36
71	58.7	0
72	58.8	80.98
73	58.9	329.41
74	59	458.59
75	59.1	384.65
76	59.2	251.3
77	59.3	183.13
78	59.4	116.49
79	59.5	0
80	59.8	0
81	59.9	116.54
82	60	216.22
83	60.1	130.63
84	60.2	0
85	60.7	0
86	60.8	449.47
87	60.9	1610.47
88	61	2252.6
89	61.1	1826.13
90	61.2	918.04
91	61.3	505.31
92	61.4	704.38
93	61.5	859.47
94	61.6	601.72
95	61.7	79.89
96	61.8	34.13
97	61.9	18.14
98	62	0
99	62.9	0
100	63	1.39
101	63.1	2.91
102	63.2	0.74
103	63.3	0
104	63.8	0
105	63.9	4.72
106	64	12.99
107	64.1	10.94
108	64.2	1.22
109	64.3	0
110	64.5	0
111	64.6	0.34
112	64.7	0.82
113	64.8	0.85
114	64.9	0.35
115	65	0
116	65.4	0
117	65.5	0.04
118	65.6	0
119	66.2	0
120	66.3	0.49
121	66.4	1.46
122	66.5	2.65
123	66.6	2.89
124	66.7	0
125	67.1	0
126	67.2	3.03
127	67.3	6.22
128	67.4	6.56
129	67.5	4.87
130	67.6	2.02
131	67.7	0
132	68	0
133	68.1	0.48
134	68.2	0.3
135	68.3	0
136	68.5	0
137	68.6	19.72
138	68.7	39.57
139	68.8	52.57
140	68.9	35.05
141	69	0
142	69.2	0
143	69.3	13.66
144	69.4	33.7
145	69.5	21.62
146	69.6	0
147	70.1	0
148	70.2	5.57
149	70.3	34.53
150	70.4	32.89
151	70.5	1.5
152	70.6	0
153	70.7	8.03
154	70.8	137.45
155	70.9	242.96
156	71	241.47
157	71.1	148.27
158	71.2	47.58
159	71.3	9.58
160	71.4	48.1
161	71.5	115.8
162	71.6	144.57
163	71.7	105.23
164	71.8	112
165	71.9	111.36
166	72	38
167	72.1	0
168	72.2	36.4
169	72.3	129.89
170	72.4	154.92
171	72.5	61.66
172	72.6	0
173	73.2	0
174	73.3	17.6
175	73.4	216.3
176	73.5	297.66
177	73.6	198.69
178	73.7	20.35
179	73.8	48.3
180	73.9	159.34
181	74	228.66
182	74.1	75.57
183	74.2	0
184	74.3	3.35
185	74.4	124.19
186	74.5	172.16
187	74.6	145.14
188	74.7	139.83
189	74.8	160.6
190	74.9	188.79
191	75	250.58
192	75.1	366.67
193	75.2	445.34
194	75.3	378.48
195	75.4	199.77
196	75.5	45.62
197	75.6	0.15
198	75.7	0
199	76.3	0
200	76.4	3.01
201	76.5	0
202	76.8	0
203	76.9	27.62
204	77	57.69
205	77.1	50.42
206	77.2	30.56
207	77.3	26.74
208	77.4	5.65
209	77.5	0
210	78.8	0
211	78.9	40.69
212	79	42.55
213	79.1	16.54
214	79.2	4.48
215	79.3	19.99
216	79.4	41.05
217	79.5	48.33
218	79.6	43.59
219	79.7	36.42
220	79.8	13.57
221	79.9	0
222	80.2	0
223	80.3	3.56
224	80.4	30.95
225	80.5	56.84
226	80.6	57.02
227	80.7	96.47
228	80.8	240.2
229	80.9	374.81
230	81	330.57
231	81.1	129.95
232	81.2	0
233	81.3	39.7
234	81.4	111.05
235	81.5	60.97
236	81.6	0
237	82.4	0
238	82.5	7.27
239	82.6	31.04
240	82.7	68.87
241	82.8	100.13
242	82.9	105.14
243	83	69.97
244	83.1	28
245	83.2	34.69
246	83.3	91.26
247	83.4	131.85
248	83.5	102.24
249	83.6	15.93
250	83.7	0
251	84.3	0
252	84.4	91.75
253	84.5	72.58
254	84.6	0
255	84.9	0
256	85	3.73
257	85.1	69.13
258	85.2	129.23
259	85.3	157.38
260	85.4	131.06
261	85.5	61.3
262	85.6	0
263	85.9	0
264	86	20.46
265	86.1	57.53
266	86.2	52.41
267	86.3	9.74
268	86.4	0
269	87.1	0
270	87.2	221.59
271	87.3	335.37
272	87.4	258.45
273	87.5	85.73
274	87.6	0
275	87.7	0
276	87.8	6.74
277	87.9	37.47
278	88	10.52
279	88.1	0
280	88.5	0
281	88.6	22.98
282	88.7	393.72
283	88.8	1233.59
284	88.9	2130.88
285	89	2566.54
286	89.1	2684.03
287	89.2	3130.77
288	89.3	4043.47
289	89.4	4642.27
290	89.5	4083.93
291	89.6	2471.81
292	89.7	734.31
293	89.8	79.82
294	89.9	0
295	90.1	0
296	90.2	277.05
297	90.3	584.54
298	90.4	585.64
299	90.5	322.91
300	90.6	60
301	90.7	0
302	90.8	17.53
303	90.9	76.29
304	91	99.82
305	91.1	92.75
306	91.2	75.44
307	91.3	66.44
308	91.4	67.86
309	91.5	60.75
310	91.6	37.07
311	91.7	22.96
312	91.8	14.52
313	91.9	14.4
314	92	21.3
315	92.1	19.46
316	92.2	7.07
317	92.3	0
318	92.5	0
319	92.6	11.85
320	92.7	15.44
321	92.8	21.39
322	92.9	64.99
323	93	128.3
324	93.1	155.67
325	93.2	115.33
326	93.3	44.06
327	93.4	1.35
328	93.5	2.94
329	93.6	0
330	93.7	0
331	93.8	2.66
332	93.9	4.08
333	94	4.48
334	94.1	4.01
335	94.2	1.07
336	94.3	0
337	94.4	0
338	94.5	2.17
339	94.6	6.87
340	94.7	0
341	95	0
342	95.1	20.18
343	95.2	32.91
344	95.3	28.98
345	95.4	1.3
346	95.5	0
347	95.7	0
348	95.8	121.57
349	95.9	257.53
350	96	345.03
351	96.1	350.4
352	96.2	268.16
353	96.3	127.47
354	96.4	7.55
355	96.5	0
356	96.6	85.98
357	96.7	189.25
358	96.8	188.03
359	96.9	55.84
360	97	0
361	97.3	0
362	97.4	82.54
363	97.5	164.01
364	97.6	175.37
365	97.7	158.65
366	97.8	138.56
367	97.9	118.42
368	98	76.6
369	98.1	18.85
370	98.2	0
371	98.4	0
372	98.5	143.89
373	98.6	139.91
374	98.7	0
375	98.9	0
376	99	144.63
377	99.1	224.25
378	99.2	67.86
379	99.3	0
380	99.4	0
381	99.5	50.37
382	99.6	104.25
383	99.7	74.19
384	99.8	54.96
385	99.9	37.18
386	100	37.06
387	100.1	0
388	100.7	0
389	100.8	18.32
390	100.9	54.35
391	101	49.4
392	101.1	83.96
393	101.2	161.52
394	101.3	111.91
395	101.4	0
396	101.6	0
397	101.7	85.05
398	101.8	282.73
399	101.9	386.7
400	102	396.54
401	102.1	223.61
402	102.2	0
403	102.4	0
404	102.5	121.31
405	102.6	182.46
406	102.7	0
407	103	0
408	103.1	44.49
409	103.2	140.51
410	103.3	76.37
411	103.4	0
412	103.9	0
413	104	5.58
414	104.1	64.79
415	104.2	108.62
416	104.3	92.59
417	104.4	30.71
418	104.5	0
419	105	0
420	105.1	69.39
421	105.2	122.89
422	105.3	104.03
423	105.4	30.79
424	105.5	0
425	106.1	0
426	106.2	31.94
427	106.3	36.69
428	106.4	37.05
429	106.5	96.91
430	106.6	195.68
431	106.7	211.97
432	106.8	54.71
433	106.9	0
434	107.5	0
435	107.6	79.36
436	107.7	62.08
437	107.8	0
438	108.1	0
439	108.2	19.74
440	108.3	44.13
441	108.4	61.64
442	108.5	49.07
443	108.6	17.02
444	108.7	0
445	109.5	0
446	109.6	22.8
447	109.7	32.48
448	109.8	33.79
449	109.9	19.86
450	110	0
451	110.8	0
452	110.9	53.33
453	111	30.46
454	111.1	0
455	111.3	0
456	111.4	99.9
457	111.5	141.49
458	111.6	93.84
459	111.7	49.4
460	111.8	23.14
461	111.9	0
462	112.8	0
463	112.9	66.73
464	113	113.34
465	113.1	79.07
466	113.2	0
467	113.4	0
468	113.5	7.23
469	113.6	93.05
470	113.7	113.09
471	113.8	18.88
472	113.9	0
473	114.5	0
474	114.6	138.33
475	114.7	374.18
476	114.8	583.31
477	114.9	648.25
478	115	554.73
479	115.1	391.25
480	115.2	279.97
481	115.3	306.54
482	115.4	418.19
483	115.5	429.56
484	115.6	229.99
485	115.7	0
486	116.2	0
487	116.3	28.18
488	116.4	22.19
489	116.5	0
490	117.1	0
491	117.2	91.3
492	117.3	156.72
493	117.4	171.01
494	117.5	136.34
495	117.6	71.86
496	117.7	15.36
497	117.8	0
498	118.6	0
499	118.7	30.44
500	118.8	115.71
501	118.9	160.15
502	119	106.57
503	119.1	0
504	119.5	0
505	119.6	8.63
506	119.7	15.98
507	119.8	25.12
508	119.9	17.72
509	120	5.66
510	120.1	0
511	120.6	0
512	120.7	36.05
513	120.8	53.31
514	120.9	0
515	121.3	0
516	121.4	191.79
517	121.5	219.14
518	121.6	106.85
519	121.7	24.88
520	121.8	0
521	121.9	77.82
522	122	167.32
523	122.1	117.33
524	122.2	0
525	122.5	0
526	122.6	50.43
527	122.7	143.41
528	122.8	127.69
529	122.9	45.35
530	123	0
531	123.5	0
532	123.6	43.15
533	123.7	64.13
534	123.8	35.96
535	123.9	0
536	124.3	0
537	124.4	33.67
538	124.5	68.72
539	124.6	77.8
540	124.7	38.97
541	124.8	0
542	125.2	0
543	125.3	37.2
544	125.4	32.3
545	125.5	8.44
546	125.6	0.54
547	125.7	15.15
548	125.8	22.75
549	125.9	13.2
550	126	0
551	126.1	0
552	126.2	11.91
553	126.3	11.85
554	126.4	0
555	127.1	0
556	127.2	22.63
557	127.3	10.3
558	127.4	0
559	127.5	0
560	127.6	0.26
561	127.7	0
562	127.9	0
563	128	4.81
564	128.1	25.61
565	128.2	48.52
566	128.3	54.23
567	128.4	59.59
568	128.5	69.96
569	128.6	85.07
570	128.7	69.01
571	128.8	26.36
572	128.9	14.63
573	129	67.71
574	129.1	123.68
575	129.2	101.13
576	129.3	7.42
577	129.4	0
578	130.1	0
579	130.2	8.41
580	130.3	76.63
581	130.4	106.27
582	130.5	100.86
583	130.6	145.58
584	130.7	273.18
585	130.8	344.2
586	130.9	220.69
587	131	0
588	131.3	0
589	131.4	81.45
590	131.5	68.2
591	131.6	4.25
592	131.7	0
593	132	0
594	132.1	22.26
595	132.2	19.11
596	132.3	0
597	133.1	0
598	133.2	65.44
599	133.3	196.56
600	133.4	239.93
601	133.5	163.66
602	133.6	59.54
603	133.7	0
604	134.9	0
605	135	22.04
606	135.1	137.19
607	135.2	220.53
608	135.3	194.4
609	135.4	75.51
610	135.5	0
611	136.3	0
612	136.4	141.23
613	136.5	209.92
614	136.6	203.94
615	136.7	278.84
616	136.8	477.43
617	136.9	630.73
618	137	590.26
619	137.1	397.09
620	137.2	164.87
621	137.3	0
622	137.5	0
623	137.6	64.28
624	137.7	28.53
625	137.8	0
626	138	0
627	138.1	23.47
628	138.2	61.47
629	138.3	56.32
630	138.4	40.7
631	138.5	43.27
632	138.6	68.4
633	138.7	87.48
634	138.8	81.24
635	138.9	68.88
636	139	79.21
637	139.1	120.89
638	139.2	170.84
639	139.3	193.77
640	139.4	155.96
641	139.5	77.04
642	139.6	16.26
643	139.7	29.55
644	139.8	72.23
645	139.9	58.74
646	140	0
647	140.4	0
648	140.5	9.24
649	140.6	60.56
650	140.7	157.09
651	140.8	243.24
652	140.9	245.17
653	141	162.52
654	141.1	72.76
655	141.2	30.86
656	141.3	24.13
657	141.4	34.34
658	141.5	55.09
659	141.6	29.88
660	141.7	0
661	142.4	0
662	142.5	29.12
663	142.6	153.19
664	142.7	218.46
665	142.8	261.55
666	142.9	357.04
667	143	431.44
668	143.1	348.31
669	143.2	144.65
670	143.3	0
671	143.4	0
672	143.5	29.37
673	143.6	33.78
674	143.7	13.24
675	143.8	0
676	144.4	0
677	144.5	141.06
678	144.6	313.38
679	144.7	368.97
680	144.8	315.27
681	144.9	261.31
682	145	260.9
683	145.1	284.23
684	145.2	294.78
685	145.3	259.87
686	145.4	143.97
687	145.5	0
688	145.7	0
689	145.8	28.11
690	145.9	97.96
691	146	74.82
692	146.1	0
693	146.5	0
694	146.6	49.96
695	146.7	235.86
696	146.8	387.26
697	146.9	356.8
698	147	153
699	147.1	0
700	147.2	0
701	147.3	14.46
702	147.4	100.86
703	147.5	106.74
704	147.6	63.81
705	147.7	6.68
706	147.8	0
707	148.1	0
708	148.2	2.61
709	148.3	16.39
710	148.4	14.51
711	148.5	0
712	149.2	0
713	149.3	105.82
714	149.4	111.72
715	149.5	35.97
716	149.6	0
717	149.7	0
718	149.8	29.35
719	149.9	90.23
720	150	124.82
721	150.1	105.93
722	150.2	45.71
723	150.3	0
724	151.6	0
725	151.7	19.42
726	151.8	18.79
727	151.9	0
728	152.3	0
729	152.4	55.82
730	152.5	195.47
731	152.6	351.18
732	152.7	449.79
733	152.8	454.97
734	152.9	397.6
735	153	339.94
736	153.1	316.47
737	153.2	324.21
738	153.3	344.21
739	153.4	341.41
740	153.5	275.62
741	153.6	128.25
742	153.7	0.72
743	153.8	0
744	153.9	0
745	154	16.72
746	154.1	56.36
747	154.2	89.73
748	154.3	101.2
749	154.4	85.74
750	154.5	64.23
751	154.6	74.84
752	154.7	104.58
753	154.8	119.63
754	154.9	81.22
755	155	0.73
756	155.1	0
757	155.4	0
758	155.5	39.52
759	155.6	100.78
760	155.7	116.18
761	155.8	54.49
762	155.9	0
763	156.2	0
764	156.3	4.95
765	156.4	90.56
766	156.5	130.77
767	156.6	155.83
768	156.7	204.47
769	156.8	255.66
770	156.9	294.3
771	157	329.73
772	157.1	347.85
773	157.2	307.98
774	157.3	197.78
775	157.4	68.91
776	157.5	0
777	157.6	0
778	157.7	65.35
779	157.8	161.54
780	157.9	164.29
781	158	97.38
782	158.1	41.22
783	158.2	28.1
784	158.3	27.23
785	158.4	31.36
786	158.5	54.96
787	158.6	118.59
788	158.7	194.39
789	158.8	233.63
790	158.9	201.82
791	159	97.64
792	159.1	0
793	159.3	0
794	159.4	10.01
795	159.5	37.26
796	159.6	62.82
797	159.7	58.36
798	159.8	0
799	160.5	0
800	160.6	40.94
801	160.7	72.81
802	160.8	134.88
803	160.9	232.75
804	161	269.09
805	161.1	207.34
806	161.2	129.87
807	161.3	90.92
808	161.4	52.02
809	161.5	15.17
810	161.6	30.55
811	161.7	48.72
812	161.8	57.18
813	161.9	23.18
814	162	0
815	162.3	0
816	162.4	35.5
817	162.5	60.81
818	162.6	76.12
819	162.7	111.01
820	162.8	169.85
821	162.9	207.41
822	163	181.66
823	163.1	100.67
824	163.2	5.16
825	163.3	0
826	163.6	0
827	163.7	4.62
828	163.8	12.3
829	163.9	15.18
830	164	22.45
831	164.1	33.08
832	164.2	35.9
833	164.3	26.01
834	164.4	10.14
835	164.5	0
836	164.7	0
837	164.8	1.78
838	164.9	34.46
839	165	59.09
840	165.1	55.91
841	165.2	30.08
842	165.3	1.24
843	165.4	0
844	165.9	0
845	166	29.07
846	166.1	47.05
847	166.2	35.43
848	166.3	0.39
849	166.4	0
850	166.7	0
851	166.8	68.17
852	166.9	127.5
853	167	121.53
854	167.1	61.79
855	167.2	8.94
856	167.3	1.89
857	167.4	31.36
858	167.5	48.54
859	167.6	36.77
860	167.7	16.3
861	167.8	6.47
862	167.9	2.7
863	168	0
864	168.1	0
865	168.2	14.78
866	168.3	24.1
867	168.4	21.3
868	168.5	31.8
869	168.6	70.6
870	168.7	104.29
871	168.8	100.06
872	168.9	53.93
873	169	0
874	169.3	0
875	169.4	13.85
876	169.5	22
877	169.6	23.28
878	169.7	25.3
879	169.8	12.41
880	169.9	0
881	170	0
882	170.1	33.02
883	170.2	78.91
884	170.3	103.93
885	170.4	104.58
886	170.5	93.41
887	170.6	71.78
888	170.7	33.03
889	170.8	4.61
890	170.9	14.97
891	171	45.57
892	171.1	51
893	171.2	23.58
894	171.3	0
895	171.4	12.44
896	171.5	41.92
897	171.6	36.66
898	171.7	0
899	171.8	0
900	171.9	47.7
901	172	130.06
902	172.1	147.18
903	172.2	88.48
904	172.3	23.16
905	172.4	27.1
906	172.5	76.06
907	172.6	119.46
908	172.7	112.2
909	172.8	73.95
910	172.9	58.58
911	173	74.05
912	173.1	77.99
913	173.2	29.86
914	173.3	0
915	174	0
916	174.1	27.17
917	174.2	36.71
918	174.3	0
919	176.1	0
920	176.2	15.06
921	176.3	4.17
922	176.4	0
923	177.5	0
924	177.6	27.77
925	177.7	50.14
926	177.8	0
927	178.8	0
928	178.9	11.69
929	179	24.6
930	179.1	26.42
931	179.2	0
932	179.5	0
933	179.6	11.7
934	179.7	0
935	180.4	0
936	180.5	4.36
937	180.6	22.94
938	180.7	8.02
939	180.8	0
940	181.6	0
941	181.7	9.93
942	181.8	36.38
943	181.9	50.37
944	182	50.63
945	182.1	37.23
946	182.2	11.99
947	182.3	0
948	182.4	3.37
949	182.5	18.77
950	182.6	17.38
951	182.7	0
952	184.8	0
953	184.9	19.4
954	185	59.83
955	185.1	96.53
956	185.2	109.59
957	185.3	80.38
958	185.4	25.65
959	185.5	0
960	185.8	0
961	185.9	18.1
962	186	32.2
963	186.1	22.1
964	186.2	0
965	186.5	0
966	186.6	4.67
967	186.7	42.64
968	186.8	31.05
969	186.9	0
970	187.1	0
971	187.2	16.11
972	187.3	64.1
973	187.4	61.54
974	187.5	27.48
975	187.6	19.46
976	187.7	4.31
977	187.8	0
978	187.9	0
979	188	12.1
980	188.1	28.11
981	188.2	30.87
982	188.3	3.74
983	188.4	0
984	188.8	0
985	188.9	62
986	189	80.15
987	189.1	20.37
988	189.2	0
989	189.3	0
990	189.4	22.11
991	189.5	34.3
992	189.6	24.2
993	189.7	0
994	189.9	0
995	190	68.18
996	190.1	117.63
997	190.2	109.32
998	190.3	67.11
999	190.4	33.95
1000	190.5	33.75
1001	190.6	55.14
1002	190.7	95.23
1003	190.8	148.11
1004	190.9	177.57
1005	191	126.86
1006	191.1	0
1007	191.7	0
1008	191.8	22.41
1009	191.9	36.09
1010	192	39.93
1011	192.1	36.59
1012	192.2	14.23
1013	192.3	0
1014	192.7	0
1015	192.8	42.47
1016	192.9	133.21
1017	193	116.2
1018	193.1	0
1019	193.3	0
1020	193.4	36.86
1021	193.5	156.53
1022	193.6	184.02
1023	193.7	125.89
1024	193.8	30.41
1025	193.9	0
1026	194.2	0
1027	194.3	6.74
1028	194.4	64.58
1029	194.5	57.11
1030	194.6	19.33
1031	194.7	14.18
1032	194.8	51.43
1033	194.9	77.25
1034	195	53.16
1035	195.1	17
1036	195.2	9.44
1037	195.3	34.24
1038	195.4	46.64
1039	195.5	54.14
1040	195.6	40.02
1041	195.7	10.17
1042	195.8	0
1043	196.3	0
1044	196.4	16.36
1045	196.5	50.29
1046	196.6	71.21
1047	196.7	66.09
1048	196.8	38.2
1049	196.9	0.83
1050	197	0
1051	197.4	0
1052	197.5	1.64
1053	197.6	14.92
1054	197.7	23.91
1055	197.8	13.82
1056	197.9	0
1057	198.2	0
1058	198.3	44
1059	198.4	76.35
1060	198.5	90.48
1061	198.6	94.54
1062	198.7	95.54
1063	198.8	99.16
1064	198.9	103.68
1065	199	84.88
1066	199.1	35.05
1067	199.2	0
1068	199.6	0
1069	199.7	5.76
1070	199.8	58.04
1071	199.9	68.44
1072	200	46.23
1073	200.1	27.73
1074	200.2	8.26
1075	200.3	0
1076	201.4	0
1077	201.5	45.65
1078	201.6	67.42
1079	201.7	48
1080	201.8	17.56
1081	201.9	20.78
1082	202	52.08
1083	202.1	72.78
1084	202.2	63.35
1085	202.3	40.16
1086	202.4	28.15
1087	202.5	25.48
1088	202.6	4.89
1089	202.7	0
1090	203	0
1091	203.1	15.29
1092	203.2	20
1093	203.3	7.49
1094	203.4	0
1095	204.2	0
1096	204.3	81.82
1097	204.4	162.84
1098	204.5	237.52
1099	204.6	337.6
1100	204.7	411.43
1101	204.8	379.09
1102	204.9	205.65
1103	205	0
1104	205.2	0
1105	205.3	29.03
1106	205.4	52.65
1107	205.5	25.43
1108	205.6	18.88
1109	205.7	47.06
1110	205.8	41.05
1111	205.9	23.33
1112	206	17.89
1113	206.1	25.64
1114	206.2	29.36
1115	206.3	38.33
1116	206.4	96
1117	206.5	124.95
1118	206.6	142
1119	206.7	183.4
1120	206.8	210.99
1121	206.9	119.62
1122	207	0
1123	207.3	0
1124	207.4	80.49
1125	207.5	110.15
1126	207.6	103.49
1127	207.7	150.59
1128	207.8	184.49
1129	207.9	162.02
1130	208	108.02
1131	208.1	64.31
1132	208.2	35.86
1133	208.3	4.32
1134	208.4	0
1135	208.7	0
1136	208.8	22.81
1137	208.9	0
1138	209.4	0
1139	209.5	28.27
1140	209.6	13.63
1141	209.7	0
1142	209.8	0
1143	209.9	15.57
1144	210	41.16
1145	210.1	63
1146	210.2	68.3
1147	210.3	52.16
1148	210.4	22.54
1149	210.5	2.67
1150	210.6	0
1151	211.2	0
1152	211.3	7.5
1153	211.4	5.51
1154	211.5	9.57
1155	211.6	19.61
1156	211.7	20.1
1157	211.8	8.81
1158	211.9	0
1159	212.2	0
1160	212.3	6.36
1161	212.4	19.24
1162	212.5	33.7
1163	212.6	42.44
1164	212.7	42.79
1165	212.8	36.42
1166	212.9	23.9
1167	213	6.56
1168	213.1	0
1169	214.5	0
1170	214.6	17.29
1171	214.7	25.98
1172	214.8	33.38
1173	214.9	59.21
1174	215	99.66
1175	215.1	145.38
1176	215.2	158.76
1177	215.3	125.17
1178	215.4	63.22
1179	215.5	12.23
1180	215.6	6.82
1181	215.7	19.59
1182	215.8	23.67
1183	215.9	34.74
1184	216	51.67
1185	216.1	71.95
1186	216.2	72.22
1187	216.3	59.54
1188	216.4	34.45
1189	216.5	0
1190	216.8	0
1191	216.9	5.89
1192	217	30.73
1193	217.1	0
1194	218.3	0
1195	218.4	73.21
1196	218.5	59.92
1197	218.6	18.16
1198	218.7	27.4
1199	218.8	88.81
1200	218.9	129.19
1201	219	109.49
1202	219.1	69.5
1203	219.2	49.88
1204	219.3	54.48
1205	219.4	78.46
1206	219.5	102.89
1207	219.6	105.62
1208	219.7	77.64
1209	219.8	32.94
1210	219.9	0
1211	221	0
1212	221.1	214
1213	221.2	328.06
1214	221.3	285.51
1215	221.4	145.02
1216	221.5	8.63
1217	221.6	0
1218	221.7	0
1219	221.8	82.08
1220	221.9	156.72
1221	222	164.34
1222	222.1	122.53
1223	222.2	83.1
1224	222.3	10.55
1225	222.4	0
1226	222.8	0
1227	222.9	154.01
1228	223	372.55
1229	223.1	374.45
1230	223.2	214.05
1231	223.3	106.98
1232	223.4	101.06
1233	223.5	90.53
1234	223.6	57.21
1235	223.7	45.83
1236	223.8	0
1237	224.1	0
1238	224.2	54.77
1239	224.3	71.96
1240	224.4	29.94
1241	224.5	8.14
1242	224.6	17.74
1243	224.7	61.18
1244	224.8	140.35
1245	224.9	240.13
1246	225	254.91
1247	225.1	121.83
1248	225.2	0
1249	225.4	0
1250	225.5	41.65
1251	225.6	14.71
1252	225.7	0
1253	225.8	0
1254	225.9	0.27
1255	226	36.84
1256	226.1	60.42
1257	226.2	46.79
1258	226.3	9.98
1259	226.4	0
1260	226.5	0
1261	226.6	5.55
1262	226.7	1.8
1263	226.8	0
1264	227.1	0
1265	227.2	29.15
1266	227.3	62.2
1267	227.4	51.61
1268	227.5	23.05
1269	227.6	4.35
1270	227.7	0
1271	228.2	0
1272	228.3	37.73
1273	228.4	79.09
1274	228.5	100.19
1275	228.6	90.84
1276	228.7	55.01
1277	228.8	8.76
1278	228.9	0
1279	229	0
1280	229.1	5.13
1281	229.2	10.74
1282	229.3	0
1283	229.5	0
1284	229.6	8.56
1285	229.7	8.39
1286	229.8	0
1287	230.4	0
1288	230.5	59.16
1289	230.6	124.73
1290	230.7	157.66
1291	230.8	133.61
1292	230.9	81.09
1293	231	47.78
1294	231.1	41.38
1295	231.2	45.18
1296	231.3	40.12
1297	231.4	24.47
1298	231.5	0
1299	232.2	0
1300	232.3	6.38
1301	232.4	11.18
1302	232.5	42.52
1303	232.6	94.59
1304	232.7	116.4
1305	232.8	92.82
1306	232.9	55.4
1307	233	36.11
1308	233.1	41.66
1309	233.2	43.28
1310	233.3	20.19
1311	233.4	0
1312	233.6	0
1313	233.7	29.13
1314	233.8	82.42
1315	233.9	117.06
1316	234	98.61
1317	234.1	34.25
1318	234.2	0
1319	234.4	0
1320	234.5	6.14
1321	234.6	6.68
1322	234.7	9.82
1323	234.8	13.5
1324	234.9	13.87
1325	235	10.03
1326	235.1	2.99
1327	235.2	0
1328	236.4	0
1329	236.5	18.8
1330	236.6	90.5
1331	236.7	162.21
1332	236.8	242.3
1333	236.9	349.69
1334	237	461.98
1335	237.1	505.19
1336	237.2	415.19
1337	237.3	221.96
1338	237.4	45.03
1339	237.5	0
1340	237.9	0
1341	238	1.29
1342	238.1	30.64
1343	238.2	30.24
1344	238.3	12.07
1345	238.4	7.02
1346	238.5	27
1347	238.6	49.68
1348	238.7	45.47
1349	238.8	23.44
1350	238.9	5.51
1351	239	6.29
1352	239.1	5.37
1353	239.2	0
1354	239.6	0
1355	239.7	5.77
1356	239.8	0
1357	240.7	0
1358	240.8	32.64
1359	240.9	62.84
1360	241	70.27
1361	241.1	53.68
1362	241.2	29.75
1363	241.3	13.73
1364	241.4	8.75
1365	241.5	7.88
1366	241.6	6.38
1367	241.7	6.84
1368	241.8	5.39
1369	241.9	0
1370	242.8	0
1371	242.9	3.43
1372	243	14.24
1373	243.1	15.51
1374	243.2	18.52
1375	243.3	20.18
1376	243.4	13.35
1377	243.5	0.41
1378	243.6	0
1379	243.9	0
1380	244	12.18
1381	244.1	29.35
1382	244.2	34.26
1383	244.3	25.62
1384	244.4	19.03
1385	244.5	33.1
1386	244.6	67.43
1387	244.7	94.54
1388	244.8	101.3
1389	244.9	98.3
1390	245	93.26
1391	245.1	76.75
1392	245.2	42.48
1393	245.3	9.9
1394	245.4	5.45
1395	245.5	14.85
1396	245.6	9.61
1397	245.7	0
1398	245.9	0
1399	246	14.88
1400	246.1	10.48
1401	246.2	0
1402	246.3	0
1403	246.4	8.9
1404	246.5	27.75
1405	246.6	31.98
1406	246.7	22.43
1407	246.8	9.19
1408	246.9	0.76
1409	247	0
1410	247.6	0
1411	247.7	36.58
1412	247.8	118.74
1413	247.9	178.31
1414	248	203.26
1415	248.1	192.64
1416	248.2	154.47
1417	248.3	106.97
1418	248.4	59.6
1419	248.5	37.56
1420	248.6	50.7
1421	248.7	93.39
1422	248.8	145.65
1423	248.9	179.62
1424	249	169.82
1425	249.1	116.52
1426	249.2	47.02
1427	249.3	6.83
1428	249.4	1.04
1429	249.5	5.41
1430	249.6	9.38
1431	249.7	0.77
1432	249.8	0
1433	250.2	0
1434	250.3	2.25
1435	250.4	15.04
1436	250.5	17.53
1437	250.6	0
1438	251.1	0
1439	251.2	8.91
1440	251.3	33.09
1441	251.4	32.52
1442	251.5	2.07
1443	251.6	0
1444	252.6	0
1445	252.7	37.93
1446	252.8	95.37
1447	252.9	116.06
1448	253	97.6
1449	253.1	56.25
1450	253.2	17.29
1451	253.3	0
1452	254	0
1453	254.1	3.33
1454	254.2	3.61
1455	254.3	0
1456	254.4	0
1457	254.5	2.2
1458	254.6	16.88
1459	254.7	26.26
1460	254.8	15.35
1461	254.9	0
1462	255.2	0
1463	255.3	3.85
1464	255.4	11.61
1465	255.5	15.98
1466	255.6	14.97
1467	255.7	10.03
1468	255.8	1.45
1469	255.9	0
1470	256.1	0
1471	256.2	12.68
1472	256.3	7.49
1473	256.4	0
1474	256.7	0
1475	256.8	10.27
1476	256.9	12.83
1477	257	2.24
1478	257.1	0
1479	257.9	0
1480	258	4.05
1481	258.1	8.16
1482	258.2	9.62
1483	258.3	10.22
1484	258.4	10.26
1485	258.5	7.7
1486	258.6	0.71
1487	258.7	0
1488	258.8	0
1489	258.9	4.96
1490	259	9.12
1491	259.1	3.02
1492	259.2	0
1493	259.4	0
1494	259.5	0.65
1495	259.6	1.4
1496	259.7	5.82
1497	259.8	17.43
1498	259.9	27.19
1499	260	23.47
1500	260.1	8.43
1501	260.2	0
1502	260.3	0
1503	260.4	5.56
1504	260.5	5.73
1505	260.6	2.36
1506	260.7	0
1507	261.2	0
1508	261.3	1.11
1509	261.4	0
1510	261.5	0
1511	261.6	15.16
1512	261.7	44.12
1513	261.8	39.14
1514	261.9	0
1515	262.2	0
1516	262.3	13.33
1517	262.4	19.72
1518	262.5	0
1519	262.9	0
1520	263	25.66
1521	263.1	51.44
1522	263.2	64.11
1523	263.3	56.33
1524	263.4	33.94
1525	263.5	11.33
1526	263.6	0
1527	265	0
1528	265.1	10.13
1529	265.2	17.9
1530	265.3	18.09
1531	265.4	8.75
1532	265.5	0
1533	266.8	0
1534	266.9	0.93
1535	267	21.28
1536	267.1	22.15
1537	267.2	16.07
1538	267.3	12.38
1539	267.4	9.32
1540	267.5	1.32
1541	267.6	0
1542	267.9	0
1543	268	14.25
1544	268.1	21.35
1545	268.2	5.72
1546	268.3	0
1547	268.4	0
1548	268.5	10.38
1549	268.6	18.38
1550	268.7	13.2
1551	268.8	0
1552	269.1	0
1553	269.2	20.75
1554	269.3	71.27
1555	269.4	87.45
1556	269.5	69.73
1557	269.6	38.23
1558	269.7	14.96
1559	269.8	8.85
1560	269.9	9.15
1561	270	0
1562	270.3	0
1563	270.4	18.66
1564	270.5	39.03
1565	270.6	24.34
1566	270.7	0
1567	271.2	0
1568	271.3	3.56
1569	271.4	6.56
1570	271.5	0
1571	271.6	0
1572	271.7	14.69
1573	271.8	30.84
1574	271.9	32.59
1575	272	18.19
1576	272.1	1.79
1577	272.2	0
1578	272.3	5.81
1579	272.4	7.2
1580	272.5	0
1581	272.8	0
1582	272.9	4.4
1583	273	25.55
1584	273.1	24.78
1585	273.2	16.03
1586	273.3	13.91
1587	273.4	17.5
1588	273.5	18.84
1589	273.6	13.02
1590	273.7	4.53
1591	273.8	0
1592	274	0
1593	274.1	0.87
1594	274.2	2.35
1595	274.3	2.47
1596	274.4	1.72
1597	274.5	3.02
1598	274.6	8.91
1599	274.7	18.18
1600	274.8	26.81
1601	274.9	32.45
1602	275	35.01
1603	275.1	33.95
1604	275.2	28.26
1605	275.3	24.39
1606	275.4	25.95
1607	275.5	31.12
1608	275.6	34.58
1609	275.7	43.83
1610	275.8	70.71
1611	275.9	103.94
1612	276	115.38
1613	276.1	90.73
1614	276.2	46.88
1615	276.3	13.72
1616	276.4	3.24
1617	276.5	0
1618	277	0
1619	277.1	19.06
1620	277.2	31.24
1621	277.3	21.34
1622	277.4	0.34
1623	277.5	0
1624	278.4	0
1625	278.5	2.28
1626	278.6	10.32
1627	278.7	9.45
1628	278.8	1.17
1629	278.9	0
1630	279	4.71
1631	279.1	16.43
1632	279.2	20.23
1633	279.3	12.84
1634	279.4	1.84
1635	279.5	0
1636	279.8	0
1637	279.9	6.59
1638	280	32.88
1639	280.1	53.27
1640	280.2	19.59
1641	280.3	0
1642	281.5	0
1643	281.6	9.59
1644	281.7	21.32
1645	281.8	30.19
1646	281.9	39.12
1647	282	50.64
1648	282.1	69.7
1649	282.2	77.55
1650	282.3	48.25
1651	282.4	0
1652	283.3	0
1653	283.4	3.8
1654	283.5	25.13
1655	283.6	24.74
1656	283.7	23.38
1657	283.8	25.77
1658	283.9	28.88
1659	284	29.31
1660	284.1	22.6
1661	284.2	20.56
1662	284.3	17.29
1663	284.4	13.59
1664	284.5	15.43
1665	284.6	21.18
1666	284.7	9.14
1667	284.8	0
1668	285.4	0
1669	285.5	8.08
1670	285.6	16.48
1671	285.7	12.08
1672	285.8	0.31
1673	285.9	0
1674	286	0
1675	286.1	4.04
1676	286.2	0
1677	287.1	0
1678	287.2	1.4
1679	287.3	2.62
1680	287.4	0
1681	287.9	0
1682	288	0.36
1683	288.1	2.9
1684	288.2	3.87
1685	288.3	4.98
1686	288.4	7.73
1687	288.5	5.59
1688	288.6	0
1689	288.8	0
1690	288.9	9.46
1691	289	21.8
1692	289.1	21.5
1693	289.2	13.73
1694	289.3	6.98
1695	289.4	8.67
1696	289.5	18.17
1697	289.6	27.89
1698	289.7	26.07
1699	289.8	6.56
1700	289.9	0
1701	290.3	0
1702	290.4	0.85
1703	290.5	0
1704	290.6	0
1705	290.7	5.15
1706	290.8	12.43
1707	290.9	16.63
1708	291	17.38
1709	291.1	20.42
1710	291.2	26.57
1711	291.3	23.77
1712	291.4	0
1713	293.5	0
1714	293.6	5.36
1715	293.7	7.87
1716	293.8	4.78
1717	293.9	0
1718	294.2	0
1719	294.3	1.32
1720	294.4	0.89
1721	294.5	0
1722	295.7	0
1723	295.8	2.38
1724	295.9	16.79
1725	296	36.31
1726	296.1	51.67
1727	296.2	56.42
1728	296.3	38.11
1729	296.4	0
1730	296.5	21.22
1731	296.6	115.84
1732	296.7	163.59
1733	296.8	63.73
1734	296.9	0
1735	297.3	0
1736	297.4	64.46
1737	297.5	324.65
1738	297.6	281.96
1739	297.7	116.06
1740	297.8	70.85
1741	297.9	236.4
1742	298	407.54
1743	298.1	367.76
1744	298.2	165.02
1745	298.3	14.36
1746	298.4	16.56
1747	298.5	82.43
1748	298.6	111.51
1749	298.7	96.82
1750	298.8	44.52
1751	298.9	0
1752	299.6	0
1753	299.7	151.31
1754	299.8	210.92
1755	299.9	156.41
1756	300	47.64
1757	300.1	0
1758	300.4	0
1759	300.5	13.88
1760	300.6	30.76
1761	300.7	44.84
1762	300.8	47.62
1763	300.9	20.55
1764	301	0
1765	301.4	0
1766	301.5	3.9
1767	301.6	9.99
1768	301.7	4.87
1769	301.8	0.19
1770	301.9	4.71
1771	302	15.87
1772	302.1	23.66
1773	302.2	20.76
1774	302.3	10.69
1775	302.4	1.97
1776	302.5	0
1777	302.6	1.61
1778	302.7	5.37
1779	302.8	5.89
1780	302.9	1.19
1781	303	0
1782	303.2	0
1783	303.3	0.96
1784	303.4	1.96
1785	303.5	1.89
1786	303.6	1.28
1787	303.7	0.97
1788	303.8	1.91
1789	303.9	3.43
1790	304	3.74
1791	304.1	2.51
1792	304.2	1.03
1793	304.3	0.2
1794	304.4	0
1795	305.7	0
1796	305.8	0.52
1797	305.9	4.52
1798	306	4.09
1799	306.1	0
1800	307.2	0
1801	307.3	1.98
1802	307.4	7.98
1803	307.5	18.31
1804	307.6	24.73
1805	307.7	19.05
1806	307.8	3.59
1807	307.9	0
1808	308.2	0
1809	308.3	6.12
1810	308.4	11.4
1811	308.5	16.15
1812	308.6	19.48
1813	308.7	16
1814	308.8	0
1815	309.4	0
1816	309.5	4.71
1817	309.6	8.71
1818	309.7	12.24
1819	309.8	11.05
1820	309.9	3.1
1821	310	0
1822	310.7	0
1823	310.8	8.48
1824	310.9	23.94
1825	311	26.97
1826	311.1	15.98
1827	311.2	2.97
1828	311.3	0
1829	311.4	0
1830	311.5	1.7
1831	311.6	0.46
1832	311.7	0
1833	311.9	0
1834	312	3.62
1835	312.1	6.02
1836	312.2	0
1837	313.1	0
1838	313.2	5.3
1839	313.3	8.58
1840	313.4	5.89
1841	313.5	3.23
1842	313.6	6.21
1843	313.7	14.86
1844	313.8	21.89
1845	313.9	19.51
1846	314	9.42
1847	314.1	1.15
1848	314.2	0.05
1849	314.3	1.69
1850	314.4	2.58
1851	314.5	2.99
1852	314.6	5.25
1853	314.7	9.24
1854	314.8	11.01
1855	314.9	6.16
1856	315	0
1857	315.6	0
1858	315.7	0.08
1859	315.8	2.88
1860	315.9	3.63
1861	316	1.85
1862	316.1	0
1863	316.3	0
1864	316.4	12.54
1865	316.5	24.34
1866	316.6	23.1
1867	316.7	8.57
1868	316.8	0
1869	317.1	0
1870	317.2	2.65
1871	317.3	0.06
1872	317.4	0
1873	317.7	0
1874	317.8	7.22
1875	317.9	6.5
1876	318	2.33
1877	318.1	0.56
1878	318.2	0.75
1879	318.3	0
1880	318.4	2.06
1881	318.5	10.7
1882	318.6	19.3
1883	318.7	18.43
1884	318.8	8.85
1885	318.9	0.61
1886	319	0.41
1887	319.1	2.4
1888	319.2	3.71
1889	319.3	3.85
1890	319.4	1.92
1891	319.5	0
1892	319.7	0
1893	319.8	6.33
1894	319.9	17.43
1895	320	17.24
1896	320.1	7.81
1897	320.2	0
1898	320.4	0
1899	320.5	0.06
1900	320.6	0.03
1901	320.7	0
1902	320.9	0
1903	321	0.04
1904	321.1	0
1905	321.5	0
1906	321.6	1.26
1907	321.7	1.97
1908	321.8	0
1909	321.9	0
1910	322	3.17
1911	322.1	8.72
1912	322.2	9.62
1913	322.3	6.88
1914	322.4	5.29
1915	322.5	6.27
1916	322.6	6.61
1917	322.7	1.03
1918	322.8	0
1919	323.7	0
1920	323.8	0.32
1921	323.9	2.21
1922	324	4.5
1923	324.1	5.19
1924	324.2	3.72
1925	324.3	1.62
1926	324.4	0
1927	324.7	0
1928	324.8	1.57
1929	324.9	0.18
1930	325	0
1931	325.3	0
1932	325.4	1.92
1933	325.5	2.7
1934	325.6	1.86
1935	325.7	0.73
1936	325.8	0.1
1937	325.9	0
1938	326.5	0
1939	326.6	2.1
1940	326.7	6.73
1941	326.8	9.74
1942	326.9	9.92
1943	327	6.65
1944	327.1	1.64
1945	327.2	0
1946	327.3	1.35
1947	327.4	7.87
1948	327.5	14.23
1949	327.6	15.15
1950	327.7	9.96
1951	327.8	3.12
1952	327.9	0
1953	328.3	0
1954	328.4	0.56
1955	328.5	5.73
1956	328.6	12.5
1957	328.7	15.29
1958	328.8	10.95
1959	328.9	4.28
1960	329	3.52
1961	329.1	10.3
1962	329.2	17.03
1963	329.3	15.86
1964	329.4	7.73
1965	329.5	0
1966	329.7	0
1967	329.8	6.37
1968	329.9	16.39
1969	330	23.78
1970	330.1	22.94
1971	330.2	15.85
1972	330.3	9.3
1973	330.4	6.59
1974	330.5	3.85
1975	330.6	0
1976	330.9	0
1977	331	1.45
1978	331.1	4.32
1979	331.2	2.9
1980	331.3	0.35
1981	331.4	0
1982	332	0
1983	332.1	2.85
1984	332.2	12.11
1985	332.3	23.07
1986	332.4	25.61
1987	332.5	15.82
1988	332.6	3.98
1989	332.7	2.04
1990	332.8	10.45
1991	332.9	16.5
1992	333	14.44
1993	333.1	6.99
1994	333.2	1.5
1995	333.3	0.83
1996	333.4	1.58
1997	333.5	0.73
[truncated: 1,921 more rows]

## Sheet: Sheet5
+ESI Scan (rt: 6.71-6.96 min, 54 scans) Frag=100.0V CF=0.000 DF=0.000 4608-02.d Subtract
Index	X	Y
0	50	0
1	50.4	0
2	50.5	0.02
3	50.6	0.2
4	50.7	0.37
5	50.8	0.6
6	50.9	0.84
7	51	0.89
8	51.1	0.51
9	51.2	0
10	51.7	0
11	51.8	0.1
12	51.9	0.22
13	52	0.15
14	52.1	0
15	52.5	0
16	52.6	0.26
17	52.7	0.94
18	52.8	1.41
19	52.9	1.07
20	53	0
21	53.4	0
22	53.5	0.11
23	53.6	0.06
24	53.7	0.13
25	53.8	0.4
26	53.9	0.6
27	54	0.26
28	54.1	0
29	54.3	0
30	54.4	2.43
31	54.5	7.41
32	54.6	3.27
33	54.7	0
34	55.9	0
35	56	1.82
36	56.1	17.58
37	56.2	22.85
38	56.3	13.4
39	56.4	0.76
40	56.5	0
41	56.6	1.21
42	56.7	0
43	56.8	17.96
44	56.9	130.54
45	57	270.43
46	57.1	294.78
47	57.2	162.08
48	57.3	3.14
49	57.4	0
50	57.5	0
51	57.6	27.19
52	57.7	9.96
53	57.8	2.64
54	57.9	0
55	58.9	0
56	59	178.41
57	59.1	301.7
58	59.2	157.19
59	59.3	0
60	59.5	0
61	59.6	29.42
62	59.7	184.67
63	59.8	98.01
64	59.9	18.07
65	60	0
66	60.1	28.22
67	60.2	45.6
68	60.3	13.7
69	60.4	0
70	60.5	0
71	60.6	40.58
72	60.7	49.31
73	60.8	14.44
74	60.9	41.61
75	61	134.09
76	61.1	190.82
77	61.2	178.35
78	61.3	158.52
79	61.4	148.68
80	61.5	100.07
81	61.6	11.08
82	61.7	0
83	61.8	0
84	61.9	1.38
85	62	51.66
86	62.1	47.3
87	62.2	26.57
88	62.3	24.7
89	62.4	34.2
90	62.5	27.64
91	62.6	10.19
92	62.7	7.62
93	62.8	13.65
94	62.9	9.87
95	63	0
96	63.4	0
97	63.5	0.49
98	63.6	3.59
99	63.7	6.73
100	63.8	8.09
101	63.9	7.06
102	64	1.93
103	64.1	0
104	64.5	0
105	64.6	0.37
106	64.7	1.18
107	64.8	0
108	65	0
109	65.1	0.48
110	65.2	1.29
111	65.3	1.42
112	65.4	1.08
113	65.5	0.77
114	65.6	0.66
115	65.7	0.58
116	65.8	0.4
117	65.9	0.15
118	66	0
119	66.6	0
120	66.7	1.45
121	66.8	5.82
122	66.9	9.2
123	67	8.02
124	67.1	4.89
125	67.2	5.08
126	67.3	8.48
127	67.4	9.59
128	67.5	6.15
129	67.6	1.89
130	67.7	0.65
131	67.8	0.93
132	67.9	1.34
133	68	0.91
134	68.1	0
135	68.5	0
136	68.6	10.65
137	68.7	37.55
138	68.8	27.3
139	68.9	0
140	69.2	0
141	69.3	42.78
142	69.4	107.48
143	69.5	90.66
144	69.6	21.23
145	69.7	0
146	70.3	0
147	70.4	1.86
148	70.5	1.84
149	70.6	0
150	71.9	0
151	72	17.96
152	72.1	28.53
153	72.2	0
154	72.6	0
155	72.7	270.54
156	72.8	471.68
157	72.9	212.25
158	73	0
159	73.1	0
160	73.2	551.24
161	73.3	1335.79
162	73.4	1422.59
163	73.5	858.48
164	73.6	260.44
165	73.7	58.09
166	73.8	10.22
167	73.9	168.69
168	74	314.71
169	74.1	241.81
170	74.2	119.81
171	74.3	12.19
172	74.4	0
173	75.1	0
174	75.2	20.27
175	75.3	139.37
176	75.4	160.68
177	75.5	91.95
178	75.6	15.35
179	75.7	0
180	75.9	0
181	76	6.28
182	76.1	0
183	76.5	0
184	76.6	4.1
185	76.7	28.26
186	76.8	43.47
187	76.9	31.26
188	77	0
189	77.6	0
190	77.7	116.82
191	77.8	207.16
192	77.9	188.92
193	78	54.34
194	78.1	0
195	78.6	0
196	78.7	4.87
197	78.8	30.23
198	78.9	45.75
199	79	25.32
200	79.1	0
201	79.3	0
202	79.4	5.17
203	79.5	34.15
204	79.6	30.6
205	79.7	9.8
206	79.8	0
207	81.3	0
208	81.4	44.94
209	81.5	75.08
210	81.6	56.8
211	81.7	36.85
212	81.8	19.34
213	81.9	0
214	82.6	0
215	82.7	40.24
216	82.8	99.4
217	82.9	119.3
218	83	68.42
219	83.1	0
220	83.3	0
221	83.4	4.27
222	83.5	14.63
223	83.6	13.21
224	83.7	7.42
225	83.8	0
226	83.9	1.43
227	84	44.22
228	84.1	75.86
229	84.2	49.79
230	84.3	0
231	84.5	0
232	84.6	12.53
233	84.7	40.66
234	84.8	91.14
235	84.9	142.76
236	85	140.82
237	85.1	65.01
238	85.2	0
239	85.5	0
240	85.6	6.84
241	85.7	0
242	85.9	0
243	86	0.83
244	86.1	15.57
245	86.2	23.31
246	86.3	24.83
247	86.4	20.97
248	86.5	13.56
249	86.6	2.97
250	86.7	4.87
251	86.8	7.67
252	86.9	0
253	87.3	0
254	87.4	37.89
255	87.5	36.94
256	87.6	23.68
257	87.7	20.87
258	87.8	0
259	88.7	0
260	88.8	48.86
261	88.9	87.54
262	89	75.66
263	89.1	172
264	89.2	428.36
265	89.3	628.51
266	89.4	523.9
267	89.5	167
268	89.6	0
269	89.7	0
270	89.8	3.89
271	89.9	119.79
272	90	215.13
273	90.1	198.51
274	90.2	205.51
275	90.3	243.56
276	90.4	273.92
277	90.5	242.85
278	90.6	151.61
279	90.7	46.79
280	90.8	0
281	90.9	0
282	91	27.36
283	91.1	37.53
284	91.2	24.07
285	91.3	11.32
286	91.4	8.37
287	91.5	1.68
288	91.6	0
289	92	0
290	92.1	1.04
291	92.2	23.41
292	92.3	37.98
293	92.4	35.58
294	92.5	19.13
295	92.6	6.39
296	92.7	10.27
297	92.8	26.68
298	92.9	40.22
299	93	36.29
300	93.1	20.75
301	93.2	6.68
302	93.3	0.25
303	93.4	0
304	93.8	0
305	93.9	2.87
306	94	0
307	94.6	0
308	94.7	0.3
309	94.8	7.1
310	94.9	17.78
311	95	21.2
312	95.1	16.39
313	95.2	14.29
314	95.3	21.68
315	95.4	35.65
316	95.5	48.37
317	95.6	70.78
318	95.7	94.35
319	95.8	98.63
320	95.9	68.72
321	96	14.79
322	96.1	0
323	96.5	0
324	96.6	39.85
325	96.7	86.28
326	96.8	106.46
327	96.9	68.2
328	97	1.97
329	97.1	0
330	97.2	11.85
331	97.3	49.53
332	97.4	50.4
333	97.5	43.59
334	97.6	59.69
335	97.7	74.49
336	97.8	61.1
337	97.9	8.73
338	98	0
339	98.1	0
340	98.2	63.86
341	98.3	129.53
342	98.4	78.92
343	98.5	0
344	98.7	0
345	98.8	118.1
346	98.9	375.67
347	99	441
348	99.1	225.86
349	99.2	0
350	99.4	0
351	99.5	88.87
352	99.6	72.33
353	99.7	2.48
354	99.8	5.59
355	99.9	24.65
356	100	79.27
357	100.1	84.46
358	100.2	37.37
359	100.3	0
360	100.4	0
361	100.5	45.13
362	100.6	96.56
363	100.7	86.07
364	100.8	66.29
365	100.9	91.81
366	101	105.6
367	101.1	28.36
368	101.2	0
369	101.4	0
370	101.5	109.84
371	101.6	131.03
372	101.7	83.19
373	101.8	78.43
374	101.9	104.65
375	102	4.56
376	102.1	0
377	102.3	0
378	102.4	166.52
379	102.5	366.56
380	102.6	285
381	102.7	129.51
382	102.8	71.05
383	102.9	39.78
384	103	0
385	103.2	0
386	103.3	1.68
387	103.4	39.11
388	103.5	19.93
389	103.6	3.12
390	103.7	13.54
391	103.8	21.3
392	103.9	16.67
393	104	8.06
394	104.1	20.95
395	104.2	42.08
396	104.3	35.78
397	104.4	12.14
398	104.5	0
399	104.7	0
400	104.8	24.5
401	104.9	65.82
402	105	71.61
403	105.1	34.46
404	105.2	0
405	105.3	12.34
406	105.4	50.45
407	105.5	63.69
408	105.6	42.63
409	105.7	18.81
410	105.8	6.21
411	105.9	0.14
412	106	2.8
413	106.1	11.01
414	106.2	23.31
415	106.3	23.16
416	106.4	17.17
417	106.5	42.36
418	106.6	85.57
419	106.7	104.13
420	106.8	85.19
421	106.9	55.34
422	107	29.91
423	107.1	0
424	107.9	0
425	108	6.92
426	108.1	38.96
427	108.2	68.69
428	108.3	54.85
429	108.4	6.32
430	108.5	0
431	108.6	0
432	108.7	20.33
433	108.8	32.17
434	108.9	11.11
435	109	0
436	109.8	0
437	109.9	4
438	110	16.72
439	110.1	3.53
440	110.2	0
441	110.3	0
442	110.4	33.03
443	110.5	141.52
444	110.6	206.46
445	110.7	171.48
446	110.8	90.65
447	110.9	53.53
448	111	42.49
449	111.1	0
450	111.5	0
451	111.6	35.32
452	111.7	61.89
453	111.8	64.48
454	111.9	44.33
455	112	12.99
456	112.1	2.23
457	112.2	21.24
458	112.3	39.26
459	112.4	20.2
460	112.5	0
461	113.2	0
462	113.3	39.51
463	113.4	11.64
464	113.5	0
465	114.4	0
466	114.5	16.93
467	114.6	0.07
468	114.7	0
469	115.2	0
470	115.3	17.42
471	115.4	162.35
472	115.5	262.64
473	115.6	235.95
474	115.7	155.94
475	115.8	134.49
476	115.9	86.56
477	116	1.36
478	116.1	0
479	116.2	0
480	116.3	25.91
481	116.4	35.27
482	116.5	32.77
483	116.6	60.84
484	116.7	84.1
485	116.8	41.4
486	116.9	0
487	117.6	0
488	117.7	16.16
489	117.8	25.94
490	117.9	29.77
491	118	31.38
492	118.1	41.23
493	118.2	74.07
494	118.3	135.83
495	118.4	153.29
496	118.5	63.85
497	118.6	0
498	118.8	0
499	118.9	21.63
500	119	6.21
501	119.1	0
502	119.2	27.22
503	119.3	66.93
504	119.4	59.86
505	119.5	25.23
506	119.6	28.21
507	119.7	15.1
508	119.8	0
509	120.8	0
510	120.9	171.73
511	121	143.22
512	121.1	0
513	121.2	0
514	121.3	115.28
515	121.4	194.39
516	121.5	51.26
517	121.6	0
518	121.9	0
519	122	6.25
520	122.1	11.53
521	122.2	4.93
522	122.3	0
523	122.4	12.61
524	122.5	60.67
525	122.6	98.1
526	122.7	114.36
527	122.8	124.84
528	122.9	134.13
529	123	123.51
530	123.1	90.61
531	123.2	42.12
532	123.3	0
533	123.5	0
534	123.6	10.73
535	123.7	44.34
536	123.8	61.25
537	123.9	56.76
538	124	38.44
539	124.1	26.26
540	124.2	29.55
541	124.3	30.48
542	124.4	19.04
543	124.5	0
544	125.1	0
545	125.2	1.26
546	125.3	44.11
547	125.4	40.36
548	125.5	13.67
549	125.6	1.25
550	125.7	6.29
551	125.8	13.13
552	125.9	6.78
553	126	0
554	126.9	0
555	127	22.93
556	127.1	46.71
557	127.2	37.31
558	127.3	15.84
559	127.4	0
560	127.5	0
561	127.6	0.83
562	127.7	9.27
563	127.8	10.15
564	127.9	0
565	128.1	0
566	128.2	9.88
567	128.3	17.42
568	128.4	1.99
569	128.5	0
570	128.6	34.03
571	128.7	118.22
572	128.8	176.9
573	128.9	136.61
574	129	0
575	129.5	0
576	129.6	11.98
577	129.7	50.44
578	129.8	48.6
579	129.9	11.85
580	130	0
581	130.1	0
582	130.2	11.2
583	130.3	27.31
584	130.4	5.17
585	130.5	0
586	130.6	0
587	130.7	86.44
588	130.8	171.56
589	130.9	117.31
590	131	0
591	131.3	0
592	131.4	132.54
593	131.5	162.41
594	131.6	88.91
595	131.7	0
596	133.3	0
597	133.4	13.55
598	133.5	40.96
599	133.6	21.76
600	133.7	0
601	133.9	0
602	134	50.82
603	134.1	73.87
604	134.2	66.98
605	134.3	55.12
606	134.4	57.96
607	134.5	55.65
608	134.6	13.05
609	134.7	0
610	134.9	0
611	135	45.85
612	135.1	42.06
613	135.2	0
614	135.4	0
615	135.5	1.83
616	135.6	42.16
617	135.7	40.19
618	135.8	0
619	136.4	0
620	136.5	19.67
621	136.6	110.86
622	136.7	247.11
623	136.8	296.69
624	136.9	216.85
625	137	99.52
626	137.1	59.9
627	137.2	115.18
628	137.3	183.64
629	137.4	170.65
630	137.5	49.88
631	137.6	0
632	137.8	0
633	137.9	7.41
634	138	56.16
635	138.1	5.94
636	138.2	0
637	138.4	0
638	138.5	11.97
639	138.6	10.02
640	138.7	0
641	139	0
642	139.1	73.46
643	139.2	98.88
644	139.3	68.56
645	139.4	35.22
646	139.5	37.76
647	139.6	57.57
648	139.7	81.47
649	139.8	100.98
650	139.9	88.68
651	140	42.82
652	140.1	0
653	140.6	0
654	140.7	12.48
655	140.8	22.44
656	140.9	47.97
657	141	63.25
658	141.1	17.69
659	141.2	0
660	141.5	0
661	141.6	128.54
662	141.7	202.46
663	141.8	152.55
664	141.9	9.52
665	142	0
666	142.3	0
667	142.4	63.94
668	142.5	141.83
669	142.6	187.15
670	142.7	103.68
671	142.8	0
672	143.3	0
673	143.4	34.5
674	143.5	12.38
675	143.6	0
676	144	0
677	144.1	9.96
678	144.2	51.8
679	144.3	70.06
680	144.4	32.71
681	144.5	0
682	145.1	0
683	145.2	81.65
684	145.3	155.88
685	145.4	82.32
686	145.5	0
687	145.7	0
688	145.8	77.38
689	145.9	122.42
690	146	111.74
691	146.1	73.81
692	146.2	32.87
693	146.3	0
694	147.4	0
695	147.5	42.72
696	147.6	59.48
697	147.7	46.35
698	147.8	43.74
699	147.9	47.66
700	148	34
701	148.1	2.23
702	148.2	0
703	148.9	0
704	149	10.68
705	149.1	52.88
706	149.2	103.69
707	149.3	113.21
708	149.4	62.12
709	149.5	0
710	150.1	0
711	150.2	13.47
712	150.3	41.78
713	150.4	34.6
714	150.5	10.03
715	150.6	0
716	150.7	14.12
717	150.8	38.88
718	150.9	37.56
719	151	0
720	153.6	0
721	153.7	14.42
722	153.8	18.14
723	153.9	15.14
724	154	0
725	154.3	0
726	154.4	18.55
727	154.5	29.57
728	154.6	29.16
729	154.7	39.02
730	154.8	38.38
731	154.9	2.87
732	155	0
733	155.4	0
734	155.5	3.66
735	155.6	37.27
736	155.7	63.24
737	155.8	55.38
738	155.9	16.06
739	156	0
740	156.2	0
741	156.3	20.03
742	156.4	104.81
743	156.5	171.84
744	156.6	194.09
745	156.7	190.36
746	156.8	185.39
747	156.9	178.27
748	157	149.11
749	157.1	86.98
750	157.2	8.38
751	157.3	0
752	157.4	0
753	157.5	25.03
754	157.6	50.37
755	157.7	12.95
756	157.8	0
757	157.9	0
758	158	0.88
759	158.1	53.88
760	158.2	74.66
761	158.3	47.66
762	158.4	0
763	158.6	0
764	158.7	24.02
765	158.8	43.59
766	158.9	36.58
767	159	9.27
768	159.1	0
769	159.5	0
770	159.6	14.66
771	159.7	20.61
772	159.8	16.23
773	159.9	24.02
774	160	45.74
775	160.1	65.05
776	160.2	63.6
777	160.3	49.59
778	160.4	52.19
779	160.5	52.06
780	160.6	56.77
781	160.7	62.3
782	160.8	87.13
783	160.9	151.36
784	161	225.37
785	161.1	243.84
786	161.2	179.24
787	161.3	77.97
788	161.4	2.28
789	161.5	0
790	161.6	0
791	161.7	29.2
792	161.8	51.91
793	161.9	49.11
794	162	22.35
795	162.1	0
796	162.7	0
797	162.8	8.02
798	162.9	44.68
799	163	26.23
800	163.1	0
801	163.4	0
802	163.5	2.89
803	163.6	0
804	164.8	0
805	164.9	3.46
806	165	3
807	165.1	1.59
808	165.2	0
809	165.8	0
810	165.9	0.04
811	166	3.83
812	166.1	0.48
813	166.2	0
814	166.4	0
815	166.5	11.18
816	166.6	64
817	166.7	101.5
818	166.8	100.53
819	166.9	75.72
820	167	54.32
821	167.1	42.34
822	167.2	23.43
823	167.3	0
824	168.1	0
825	168.2	3.49
826	168.3	7.78
827	168.4	3.56
828	168.5	0
829	169.3	0
830	169.4	5.68
831	169.5	10.87
832	169.6	9.36
833	169.7	17.9
834	169.8	27.34
835	169.9	20
836	170	0.29
837	170.1	0
838	170.2	2.45
839	170.3	14.37
840	170.4	12.02
841	170.5	0
842	171.2	0
843	171.3	31.47
844	171.4	75.03
845	171.5	61.68
846	171.6	9.42
847	171.7	0
848	172.3	0
849	172.4	1.51
850	172.5	44.55
851	172.6	75.52
852	172.7	67.42
853	172.8	24.16
854	172.9	0
855	173.4	0
856	173.5	19.8
857	173.6	58.48
858	173.7	113.75
859	173.8	168.45
860	173.9	187.45
861	174	156.96
862	174.1	105.8
863	174.2	71.83
864	174.3	44.43
865	174.4	3.79
866	174.5	0
867	174.9	0
868	175	37.72
869	175.1	70.98
870	175.2	52.09
871	175.3	15.29
872	175.4	0.89
873	175.5	1.61
874	175.6	8.94
875	175.7	3.3
876	175.8	0
877	176.4	0
878	176.5	11.93
879	176.6	88.47
880	176.7	151.47
881	176.8	160.22
882	176.9	107.04
883	177	40.98
884	177.1	28.32
885	177.2	68.49
886	177.3	93.6
887	177.4	53.83
888	177.5	0
889	177.7	0
890	177.8	13.5
891	177.9	79.21
892	178	132.59
893	178.1	127.84
894	178.2	66.4
895	178.3	0
896	178.9	0
897	179	2.04
898	179.1	0
899	179.4	0
900	179.5	11.25
901	179.6	31.88
902	179.7	24.74
903	179.8	0
904	180.1	0
905	180.2	1.56
906	180.3	28.33
907	180.4	48.3
908	180.5	48.43
909	180.6	38.41
910	180.7	25.69
911	180.8	12.13
912	180.9	0.65
913	181	0
914	181.5	0
915	181.6	11.93
916	181.7	22.19
917	181.8	25.28
918	181.9	30.53
919	182	37.37
920	182.1	36.69
921	182.2	20.42
922	182.3	0
923	182.6	0
924	182.7	11.26
925	182.8	1.97
926	182.9	0
927	183	0.45
928	183.1	31
929	183.2	49.61
930	183.3	40.25
931	183.4	18.14
932	183.5	0
933	183.7	0
934	183.8	10.79
935	183.9	11.66
936	184	4.51
937	184.1	16.04
938	184.2	44.61
939	184.3	54.58
940	184.4	31
941	184.5	0
942	185.1	0
943	185.2	0.46
944	185.3	11.49
945	185.4	13.08
946	185.5	14.76
947	185.6	8.64
948	185.7	0
949	186.2	0
950	186.3	13.24
951	186.4	57.11
952	186.5	93.67
953	186.6	85.91
954	186.7	24.32
955	186.8	0
956	187	0
957	187.1	4.19
958	187.2	11.27
959	187.3	0
960	188.4	0
961	188.5	40.38
962	188.6	73.57
963	188.7	53.93
964	188.8	0
965	189.1	0
966	189.2	6.73
967	189.3	56.08
968	189.4	58.21
969	189.5	21.77
970	189.6	0
971	189.9	0
972	190	6.68
973	190.1	14.6
974	190.2	21.31
975	190.3	10.92
976	190.4	0
977	190.7	0
978	190.8	140.55
979	190.9	229.48
980	191	223.46
981	191.1	165.42
982	191.2	115.38
983	191.3	84.54
984	191.4	51.48
985	191.5	15.42
986	191.6	0
987	192.5	0
988	192.6	3.81
989	192.7	30.42
990	192.8	16.01
991	192.9	0
992	193	4.18
993	193.1	56.9
994	193.2	89.17
995	193.3	55.63
996	193.4	0
997	194.7	0
998	194.8	0.52
999	194.9	14.1
1000	195	0
1001	195.9	0
1002	196	0.11
1003	196.1	0
1004	196.4	0
1005	196.5	20.26
1006	196.6	47.09
1007	196.7	63.11
1008	196.8	61.14
1009	196.9	41.29
1010	197	19.88
1011	197.1	6.64
1012	197.2	8.12
1013	197.3	11.85
1014	197.4	9.42
1015	197.5	2.88
1016	197.6	0
1017	197.8	0
1018	197.9	11.52
1019	198	59.71
1020	198.1	75.47
1021	198.2	40.25
1022	198.3	0
1023	199.1	0
1024	199.2	10.05
1025	199.3	6.24
1026	199.4	0
1027	199.7	0
1028	199.8	21.17
1029	199.9	47.51
1030	200	43.6
1031	200.1	17.3
1032	200.2	0
1033	200.5	0
1034	200.6	29.11
1035	200.7	60.74
1036	200.8	60.32
1037	200.9	44.61
1038	201	38.74
1039	201.1	43.78
1040	201.2	38.21
1041	201.3	14.7
1042	201.4	0
1043	201.7	0
1044	201.8	10.08
1045	201.9	21.32
1046	202	14.49
1047	202.1	0
1048	202.3	0
1049	202.4	6.46
1050	202.5	26.93
1051	202.6	30.79
1052	202.7	15.56
1053	202.8	0
1054	203.5	0
1055	203.6	0.83
1056	203.7	26.61
1057	203.8	43.51
1058	203.9	39.2
1059	204	19.53
1060	204.1	0
1061	205.2	0
1062	205.3	73.59
1063	205.4	108.9
1064	205.5	86.26
1065	205.6	47.51
1066	205.7	8.17
1067	205.8	0
1068	205.9	0
1069	206	5.52
1070	206.1	34.84
1071	206.2	73.01
1072	206.3	121.35
1073	206.4	114.39
1074	206.5	18.25
1075	206.6	0
1076	206.7	0
1077	206.8	21.98
1078	206.9	171.1
1079	207	223.75
1080	207.1	138.49
1081	207.2	5.41
1082	207.3	0
1083	207.5	0
1084	207.6	5.87
1085	207.7	6.33
1086	207.8	6.61
1087	207.9	0
1088	208.7	0
1089	208.8	14.46
1090	208.9	20.93
1091	209	0
1092	209.3	0
1093	209.4	17.86
1094	209.5	35.23
1095	209.6	10.8
1096	209.7	0
1097	209.9	0
1098	210	18.85
1099	210.1	36.3
1100	210.2	36.14
1101	210.3	15.56
1102	210.4	0
1103	210.7	0
1104	210.8	6.11
1105	210.9	4.45
1106	211	0
1107	211.7	0
1108	211.8	13.7
1109	211.9	31.32
1110	212	41.07
1111	212.1	38.06
1112	212.2	23.09
1113	212.3	2.06
1114	212.4	0
1115	212.5	0
1116	212.6	7.84
1117	212.7	5.7
1118	212.8	0
1119	212.9	0
1120	213	1.95
1121	213.1	56.38
1122	213.2	93.58
1123	213.3	86.7
1124	213.4	45.96
1125	213.5	5.02
1126	213.6	0
1127	215.4	0
1128	215.5	6.48
1129	215.6	14.98
1130	215.7	12.68
1131	215.8	9.95
1132	215.9	16.09
1133	216	19.24
1134	216.1	4.81
1135	216.2	0
1136	216.7	0
1137	216.8	3.58
1138	216.9	2.33
1139	217	0.61
1140	217.1	9.68
1141	217.2	29.2
1142	217.3	92.98
1143	217.4	297.15
1144	217.5	720.23
1145	217.6	1400.44
1146	217.7	2318.09
1147	217.8	3427.87
1148	217.9	4578.72
1149	218	5446.94
1150	218.1	5733.17
1151	218.2	5428.31
1152	218.3	4720.5
1153	218.4	3705.56
1154	218.5	2444.79
1155	218.6	1249.69
1156	218.7	541.17
1157	218.8	367.1
1158	218.9	453.36
1159	219	504.16
1160	219.1	477.15
1161	219.2	460.22
1162	219.3	466.05
1163	219.4	402.4
1164	219.5	234.23
1165	219.6	53.37
1166	219.7	0
1167	219.8	6.67
1168	219.9	79.58
1169	220	123.15
1170	220.1	103.78
1171	220.2	61.85
1172	220.3	60.93
1173	220.4	130.22
1174	220.5	202.4
1175	220.6	227.18
1176	220.7	205.9
1177	220.8	182.02
1178	220.9	177.09
1179	221	177.37
1180	221.1	147.78
1181	221.2	75.17
1182	221.3	0
1183	221.5	0
1184	221.6	13.39
1185	221.7	43.5
1186	221.8	42.29
1187	221.9	13.61
1188	222	0
1189	222.2	0
1190	222.3	39.58
1191	222.4	73.67
1192	222.5	30.93
1193	222.6	0
1194	222.9	0
1195	223	4.66
1196	223.1	0
1197	223.4	0
1198	223.5	64
1199	223.6	0
1200	223.9	0
1201	224	18.98
1202	224.1	157.91
1203	224.2	287.76
1204	224.3	297.62
1205	224.4	165.96
1206	224.5	9.97
1207	224.6	0
1208	225.4	0
1209	225.5	17.28
1210	225.6	0
1211	225.9	0
1212	226	29.81
1213	226.1	58.83
1214	226.2	43.2
1215	226.3	4.03
1216	226.4	0
1217	226.6	0
1218	226.7	4.87
1219	226.8	0
1220	227.3	0
1221	227.4	10.28
1222	227.5	29.24
1223	227.6	33.79
1224	227.7	20.69
1225	227.8	5.22
1226	227.9	0.98
1227	228	5.55
1228	228.1	4.06
1229	228.2	0
1230	228.5	0
1231	228.6	13.49
1232	228.7	31.67
1233	228.8	28.75
1234	228.9	8.85
1235	229	0
1236	229.1	10.02
1237	229.2	23.3
1238	229.3	24.42
1239	229.4	21.62
1240	229.5	17.31
1241	229.6	10.07
1242	229.7	0
1243	229.9	0
1244	230	4.87
1245	230.1	10.71
1246	230.2	6.07
1247	230.3	0.25
1248	230.4	5.68
1249	230.5	27.19
1250	230.6	46.22
1251	230.7	45.42
1252	230.8	18.85
1253	230.9	0
1254	231.3	0
1255	231.4	10.5
1256	231.5	30.8
1257	231.6	29.93
1258	231.7	17.31
1259	231.8	8.64
1260	231.9	0.84
1261	232	0
1262	232.3	0
1263	232.4	1.51
1264	232.5	27.37
1265	232.6	35.37
1266	232.7	31.62
1267	232.8	32.73
1268	232.9	38.27
1269	233	32.17
1270	233.1	8.95
1271	233.2	0
1272	234.5	0
1273	234.6	30.02
1274	234.7	32.27
1275	234.8	0
1276	235.1	0
1277	235.2	9.12
1278	235.3	31.89
1279	235.4	31.53
1280	235.5	20.04
1281	235.6	7.09
1282	235.7	0
1283	236.2	0
1284	236.3	16.65
1285	236.4	44.94
1286	236.5	73.96
1287	236.6	108.99
1288	236.7	136.02
1289	236.8	134.11
1290	236.9	108.91
1291	237	105.58
1292	237.1	128.29
1293	237.2	130.23
1294	237.3	83.7
1295	237.4	23.13
1296	237.5	0
1297	238.2	0
1298	238.3	1.32
1299	238.4	12.9
1300	238.5	26.6
1301	238.6	36.6
1302	238.7	37.34
1303	238.8	33.6
1304	238.9	33.01
1305	239	31.14
1306	239.1	22.83
1307	239.2	10.16
1308	239.3	1.74
1309	239.4	0
1310	239.5	0
1311	239.6	0.01
1312	239.7	4.39
1313	239.8	7.31
1314	239.9	5.42
1315	240	1.17
1316	240.1	0
1317	240.2	5.45
1318	240.3	21.93
1319	240.4	36.9
1320	240.5	39.02
1321	240.6	25.84
1322	240.7	4.4
1323	240.8	0
1324	241.1	0
1325	241.2	9.63
1326	241.3	21.07
1327	241.4	15.32
1328	241.5	0.07
1329	241.6	0
1330	241.9	0
1331	242	5.94
1332	242.1	12.82
1333	242.2	17.61
1334	242.3	18.34
1335	242.4	13.38
1336	242.5	3.45
1337	242.6	0
1338	242.9	0
1339	243	0.49
1340	243.1	0.93
1341	243.2	0
1342	243.3	0
1343	243.4	0.79
1344	243.5	3.32
1345	243.6	3.79
1346	243.7	1.07
1347	243.8	0
1348	244.2	0
1349	244.3	0.04
1350	244.4	4.56
1351	244.5	5.89
1352	244.6	0
1353	244.9	0
1354	245	11.46
1355	245.1	45.21
1356	245.2	58.06
1357	245.3	46.41
1358	245.4	25.96
1359	245.5	20.68
1360	245.6	29.75
1361	245.7	32.53
1362	245.8	19.31
1363	245.9	0
1364	247.3	0
1365	247.4	5.77
1366	247.5	28.46
1367	247.6	49.75
1368	247.7	50.41
1369	247.8	32.98
1370	247.9	6.72
1371	248	0
1372	248.2	0
1373	248.3	9.21
1374	248.4	12.51
1375	248.5	0
1376	248.8	0
1377	248.9	12.09
1378	249	24.89
1379	249.1	13.93
1380	249.2	0
1381	249.4	0
1382	249.5	12.78
1383	249.6	19.79
1384	249.7	14.53
1385	249.8	2.96
1386	249.9	0
1387	250.3	0
1388	250.4	3.4
1389	250.5	13.29
1390	250.6	18.98
1391	250.7	16.03
1392	250.8	5.2
1393	250.9	0
1394	251.4	0
1395	251.5	2.96
1396	251.6	3.53
1397	251.7	12.82
1398	251.8	27.67
1399	251.9	33.94
1400	252	24.66
1401	252.1	9.86
1402	252.2	5.23
1403	252.3	16.23
1404	252.4	27.4
1405	252.5	23.69
1406	252.6	0
1407	253.6	0
1408	253.7	0.88
1409	253.8	8.83
1410	253.9	11.43
1411	254	9.33
1412	254.1	3.9
1413	254.2	0.2
1414	254.3	3.13
1415	254.4	12.88
1416	254.5	21.17
1417	254.6	21.55
1418	254.7	14.69
1419	254.8	9.17
1420	254.9	8.69
1421	255	8.2
1422	255.1	1.96
1423	255.2	0
1424	255.4	0
1425	255.5	12.43
1426	255.6	20.82
1427	255.7	19.82
1428	255.8	14.97
1429	255.9	14
1430	256	16.05
1431	256.1	14.04
1432	256.2	7.55
1433	256.3	2.66
1434	256.4	2.66
1435	256.5	4.14
1436	256.6	1.13
1437	256.7	0
1438	257.1	0
1439	257.2	10.99
1440	257.3	20.78
1441	257.4	25.28
1442	257.5	27.15
1443	257.6	26.78
1444	257.7	19.12
1445	257.8	6.6
1446	257.9	0.75
1447	258	0.47
1448	258.1	2.86
1449	258.2	5.66
1450	258.3	5.9
1451	258.4	4.13
1452	258.5	2.01
1453	258.6	0.42
1454	258.7	0
1455	259.2	0
1456	259.3	3.47
1457	259.4	4.16
1458	259.5	0
1459	259.7	0
1460	259.8	8.01
1461	259.9	17.04
1462	260	19.04
1463	260.1	15.26
1464	260.2	8.84
1465	260.3	0.96
1466	260.4	0
1467	260.6	0
1468	260.7	2.77
1469	260.8	7.26
1470	260.9	10.81
1471	261	10.82
1472	261.1	6.49
1473	261.2	0.15
1474	261.3	0
1475	261.5	0
1476	261.6	38.74
1477	261.7	125.71
1478	261.8	233.63
1479	261.9	335.42
1480	262	406.55
1481	262.1	416.77
1482	262.2	337.98
1483	262.3	182.38
1484	262.4	24.12
1485	262.5	0
1486	262.7	0
1487	262.8	46.93
1488	262.9	111.97
1489	263	160.74
1490	263.1	147.6
1491	263.2	75.49
1492	263.3	0
1493	264.4	0
1494	264.5	2.24
1495	264.6	2.91
1496	264.7	3.87
1497	264.8	8.09
1498	264.9	13.67
1499	265	15.69
1500	265.1	12.82
1501	265.2	7.19
1502	265.3	3.15
1503	265.4	0
1504	265.6	0
1505	265.7	1.06
1506	265.8	0.38
1507	265.9	0
1508	266.3	0
1509	266.4	1.86
1510	266.5	10.95
1511	266.6	23.25
1512	266.7	31.42
1513	266.8	27.47
1514	266.9	22.56
1515	267	24.79
1516	267.1	30.37
1517	267.2	25.47
1518	267.3	11.08
1519	267.4	0
1520	267.6	0
1521	267.7	2.45
1522	267.8	11.69
1523	267.9	18.36
1524	268	15.26
1525	268.1	2.02
1526	268.2	0
1527	268.4	0
1528	268.5	2.89
1529	268.6	9.9
1530	268.7	3.9
1531	268.8	0
1532	269.1	0
1533	269.2	8.37
1534	269.3	29.46
1535	269.4	35.77
1536	269.5	23.51
1537	269.6	4.53
1538	269.7	0
1539	269.9	0
1540	270	21.32
1541	270.1	44.88
1542	270.2	48.34
1543	270.3	27.06
1544	270.4	0.04
1545	270.5	0
1546	271.5	0
1547	271.6	6.81
1548	271.7	19.74
1549	271.8	28.96
1550	271.9	29.93
1551	272	25.91
1552	272.1	21.12
1553	272.2	14.66
1554	272.3	4.5
1555	272.4	0
1556	272.8	0
1557	272.9	0.58
1558	273	16.36
1559	273.1	20.11
1560	273.2	11.87
1561	273.3	2.4
1562	273.4	0
1563	274.1	0
1564	274.2	0.08
1565	274.3	0
1566	275	0
1567	275.1	13.81
1568	275.2	40.17
1569	275.3	55.86
1570	275.4	44.71
1571	275.5	12.39
1572	275.6	0
1573	275.8	0
1574	275.9	11.62
1575	276	17.21
1576	276.1	12.37
1577	276.2	5.3
1578	276.3	0
1579	278.4	0
1580	278.5	5.04
1581	278.6	1.98
1582	278.7	0
1583	279.5	0
1584	279.6	4.21
1585	279.7	5.95
1586	279.8	4.03
1587	279.9	0
1588	281	0
1589	281.1	0.78
1590	281.2	157.4
1591	281.3	163.36
1592	281.4	69.3
1593	281.5	7.85
1594	281.6	0
1595	281.7	13.91
1596	281.8	50.17
1597	281.9	104.19
1598	282	163.75
1599	282.1	194.08
1600	282.2	179.21
1601	282.3	123.16
1602	282.4	43.84
1603	282.5	0
1604	282.7	0
1605	282.8	13.73
1606	282.9	45.89
1607	283	73.53
1608	283.1	73.05
1609	283.2	33.73
1610	283.3	0
1611	285.1	0
1612	285.2	5.87
1613	285.3	20.41
1614	285.4	28.79
1615	285.5	21.78
1616	285.6	3.98
1617	285.7	0
1618	286.1	0
1619	286.2	4.09
1620	286.3	14.07
1621	286.4	16.19
1622	286.5	7.13
1623	286.6	0
1624	286.8	0
1625	286.9	5.72
1626	287	11.98
1627	287.1	4.65
1628	287.2	0
1629	287.7	0
1630	287.8	2.79
1631	287.9	7.65
1632	288	11.62
1633	288.1	12.32
1634	288.2	9.5
1635	288.3	5.06
1636	288.4	1.36
1637	288.5	0
1638	289.4	0
1639	289.5	0.07
1640	289.6	1.87
1641	289.7	0.05
1642	289.8	0
1643	290.1	0
1644	290.2	7.54
1645	290.3	8.52
1646	290.4	2.55
1647	290.5	0
1648	291.4	0
1649	291.5	0.75
1650	291.6	11.35
1651	291.7	10.67
1652	291.8	5.85
1653	291.9	0
1654	292.6	0
1655	292.7	2.16
1656	292.8	11.6
1657	292.9	21.1
1658	293	24.84
1659	293.1	18.02
1660	293.2	4.88
1661	293.3	0
1662	293.4	3.19
1663	293.5	8.77
1664	293.6	11.38
1665	293.7	12.61
1666	293.8	12.6
1667	293.9	8.86
1668	294	2.92
1669	294.1	0.19
1670	294.2	1.74
1671	294.3	2.81
1672	294.4	0.46
1673	294.5	0
1674	294.6	0
1675	294.7	0.93
1676	294.8	0
1677	295.6	0
1678	295.7	1.73
1679	295.8	5.15
1680	295.9	4.11
1681	296	0
1682	296.3	0
1683	296.4	11.24
1684	296.5	137.27
1685	296.6	298.64
1686	296.7	371.92
1687	296.8	266.67
1688	296.9	49.15
1689	297	0
1690	297.5	0
1691	297.6	40.17
1692	297.7	144.98
1693	297.8	177.78
1694	297.9	109.08
1695	298	0
1696	298.2	0
1697	298.3	5.26
1698	298.4	29.88
1699	298.5	0
1700	298.9	0
1701	299	45.29
1702	299.1	149.74
1703	299.2	256.45
1704	299.3	261.77
1705	299.4	147.22
1706	299.5	38.56
1707	299.6	0
1708	300.1	0
1709	300.2	0.08
1710	300.3	0
1711	300.4	2.56
1712	300.5	8.98
1713	300.6	10.63
1714	300.7	8.77
1715	300.8	5.14
1716	300.9	4.97
1717	301	5.96
1718	301.1	2.24
1719	301.2	0
1720	301.4	0
1721	301.5	11.5
1722	301.6	22.47
1723	301.7	19.51
1724	301.8	2.41
1725	301.9	0
1726	302.4	0
1727	302.5	2.61
1728	302.6	10.09
1729	302.7	18.28
1730	302.8	24.39
1731	302.9	24.7
1732	303	18.69
1733	303.1	10.98
1734	303.2	6.08
1735	303.3	3.43
1736	303.4	1.17
1737	303.5	0.77
1738	303.6	5.24
1739	303.7	9.61
1740	303.8	9.57
1741	303.9	8.49
1742	304	10.38
1743	304.1	13.85
1744	304.2	13.42
1745	304.3	7.94
1746	304.4	1.27
1747	304.5	0
1748	305	0
1749	305.1	0.82
1750	305.2	3.4
1751	305.3	6.03
1752	305.4	4.5
1753	305.5	0
1754	307.8	0
1755	307.9	2.6
1756	308	2.97
1757	308.1	1.31
1758	308.2	0
1759	309.2	0
1760	309.3	1.34
1761	309.4	6.88
1762	309.5	4.11
1763	309.6	0
1764	309.7	0
1765	309.8	0.01
1766	309.9	2.88
1767	310	3.49
1768	310.1	1.78
1769	310.2	0
1770	310.3	0
1771	310.4	2.34
1772	310.5	10.17
1773	310.6	20.45
1774	310.7	27
1775	310.8	25.4
1776	310.9	17.52
1777	311	8.21
1778	311.1	0.14
1779	311.2	0
1780	311.5	0
1781	311.6	1.78
1782	311.7	10.53
1783	311.8	17.08
1784	311.9	16.18
1785	312	8.39
1786	312.1	0.37
1787	312.2	0
1788	312.3	0
1789	312.4	0.26
1790	312.5	0.79
1791	312.6	0
1792	312.9	0
1793	313	3.75
1794	313.1	18.39
1795	313.2	22.08
1796	313.3	13.6
1797	313.4	3.69
1798	313.5	2.07
1799	313.6	5.04
1800	313.7	6.96
1801	313.8	5.05
1802	313.9	1.62
1803	314	0
1804	314.9	0
1805	315	1.39
1806	315.1	2.74
1807	315.2	0.92
1808	315.3	0
1809	315.9	0
1810	316	0.46
1811	316.1	0
1812	316.4	0
1813	316.5	0.53
1814	316.6	5.35
1815	316.7	11.31
1816	316.8	13.94
1817	316.9	10.52
1818	317	3.92
1819	317.1	0
1820	317.5	0
1821	317.6	0.14
1822	317.7	0.83
1823	317.8	1.11
1824	317.9	0.64
1825	318	0
1826	318.4	0
1827	318.5	4.54
1828	318.6	6.2
1829	318.7	5.84
1830	318.8	8.02
1831	318.9	11.96
1832	319	11.87
1833	319.1	6.79
1834	319.2	1.05
1835	319.3	0
1836	319.5	0
1837	319.6	11.62
1838	319.7	30.28
1839	319.8	38.62
1840	319.9	29.19
1841	320	11.57
1842	320.1	0.59
1843	320.2	0
1844	320.9	0
1845	321	7.37
1846	321.1	28.09
1847	321.2	32.86
1848	321.3	25.02
1849	321.4	13.86
1850	321.5	5.31
1851	321.6	0
1852	323.1	0
1853	323.2	3.19
1854	323.3	4
1855	323.4	2.14
1856	323.5	2.82
1857	323.6	7.42
1858	323.7	11.19
1859	323.8	9.05
1860	323.9	2.44
1861	324	0
1862	324.4	0
1863	324.5	0.49
1864	324.6	0.97
1865	324.7	1.13
1866	324.8	0.8
1867	324.9	0.14
1868	325	0
1869	325.5	0
1870	325.6	2.82
1871	325.7	6.88
1872	325.8	7.94
1873	325.9	4.67
1874	326	0.2
1875	326.1	0
1876	326.4	0
1877	326.5	2.87
1878	326.6	6.53
1879	326.7	7.86
1880	326.8	5.59
1881	326.9	1.28
1882	327	0
1883	328.1	0
1884	328.2	0.71
1885	328.3	2.52
1886	328.4	4.35
1887	328.5	5.67
1888	328.6	7.38
1889	328.7	9.12
1890	328.8	8.18
1891	328.9	3.44
1892	329	0
1893	329.2	0
1894	329.3	0.2
1895	329.4	0
1896	330.2	0
1897	330.3	11.7
1898	330.4	24.85
1899	330.5	28.27
1900	330.6	18.41
1901	330.7	4.04
1902	330.8	0
1903	330.9	0
1904	331	0.27
1905	331.1	6.65
1906	331.2	9.71
1907	331.3	7.69
1908	331.4	3.89
1909	331.5	2.13
1910	331.6	2.08
1911	331.7	1.09
1912	331.8	0
1913	332.2	0
1914	332.3	20.82
1915	332.4	52.07
1916	332.5	65.54
1917	332.6	46.89
1918	332.7	14.56
1919	332.8	0
1920	332.9	1.07
1921	333	4.38
1922	333.1	4.74
1923	333.2	1.41
1924	333.3	0
1925	333.4	0
1926	333.5	0.58
1927	333.6	0.5
1928	333.7	0
1929	335.5	0
1930	335.6	0.06
1931	335.7	0
1932	336.5	0
1933	336.6	1.45
1934	336.7	1.6
1935	336.8	0
1936	337.6	0
1937	337.7	0.02
1938	337.8	0.82
1939	337.9	2.59
1940	338	7.48
1941	338.1	13.66
1942	338.2	17.38
1943	338.3	16.05
1944	338.4	10.26
1945	338.5	2.85
1946	338.6	0
1947	338.8	0
1948	338.9	2.29
1949	339	3.44
1950	339.1	2.96
1951	339.2	1.77
1952	339.3	0.55
1953	339.4	0.26
1954	339.5	1.11
1955	339.6	1.23
1956	339.7	0
1957	340.1	0
1958	340.2	2.69
1959	340.3	6.3
1960	340.4	9.91
1961	340.5	12.37
1962	340.6	12.47
1963	340.7	12.48
1964	340.8	11.5
1965	340.9	7.04
1966	341	0.69
1967	341.1	0
1968	341.3	0
1969	341.4	0.57
1970	341.5	0
1971	342	0
1972	342.1	3.81
1973	342.2	4.8
1974	342.3	3.59
1975	342.4	3
1976	342.5	3.45
1977	342.6	3.74
1978	342.7	2.61
1979	342.8	0.06
1980	342.9	0
1981	343.4	0
1982	343.5	1.28
1983	343.6	3.23
1984	343.7	5.88
1985	343.8	9.04
1986	343.9	10.03
1987	344	7.16
1988	344.1	2.9
1989	344.2	0.55
1990	344.3	0
1991	345	0
1992	345.1	1.46
1993	345.2	2.27
1994	345.3	1.05
1995	345.4	0.1
1996	345.5	0.28
1997	345.6	0.86
[truncated: 1,568 more rows]

## Sheet: Sheet6
+ESI Scan (rt: 8.12-8.45 min, 72 scans) Frag=100.0V CF=0.000 DF=0.000 4608-02.d Subtract
Index	X	Y
0	50	0.43
1	50.1	0.27
2	50.2	0.2
3	50.3	0.07
4	50.4	0.02
5	50.5	0.08
6	50.6	0.14
7	50.7	0.07
8	50.8	0
9	51.1	0
10	51.2	0.09
11	51.3	0.07
12	51.4	0
13	51.8	0
14	51.9	0.19
15	52	0.74
16	52.1	1.03
17	52.2	1.08
18	52.3	0.85
19	52.4	0.29
20	52.5	0
21	53	0
22	53.1	0.16
23	53.2	0.47
24	53.3	0.41
25	53.4	0.03
26	53.5	0
27	54	0
28	54.1	0.44
29	54.2	0.71
30	54.3	0.81
31	54.4	2.66
32	54.5	5.33
33	54.6	7.62
34	54.7	0
35	55.1	0
36	55.2	16.46
37	55.3	0.93
38	55.4	0
39	56.1	0
40	56.2	1.49
41	56.3	7.27
42	56.4	10.5
43	56.5	5.77
44	56.6	4.66
45	56.7	0
46	56.9	0
47	57	31.91
48	57.1	158.46
49	57.2	304.91
50	57.3	353.55
51	57.4	255.99
52	57.5	94.4
53	57.6	0
54	57.7	0
55	57.8	0.38
56	57.9	12.4
57	58	0
58	58.5	0
59	58.6	177.24
60	58.7	634.32
61	58.8	994.3
62	58.9	847.22
63	59	189.47
64	59.1	0
65	59.2	0
66	59.3	192.07
67	59.4	620.71
68	59.5	585.52
69	59.6	238.48
70	59.7	0
71	59.9	0
72	60	11.53
73	60.1	0
74	60.4	0
75	60.5	4.94
76	60.6	4.15
77	60.7	0
78	60.8	12.49
79	60.9	40
80	61	112.44
81	61.1	269.37
82	61.2	463.02
83	61.3	551.56
84	61.4	444.75
85	61.5	221.9
86	61.6	45.16
87	61.7	6.33
88	61.8	0
89	61.9	3.54
90	62	8.33
91	62.1	16.17
92	62.2	7.48
93	62.3	0
94	62.4	2.26
95	62.5	22.93
96	62.6	31.42
97	62.7	17.41
98	62.8	0
99	63.4	0
100	63.5	1.13
101	63.6	12.67
102	63.7	15.98
103	63.8	14.16
104	63.9	14.9
105	64	16.02
106	64.1	11
107	64.2	1.65
108	64.3	0
109	64.4	0
110	64.5	5.16
111	64.6	4.82
112	64.7	1.67
113	64.8	0.63
114	64.9	1.85
115	65	3.14
116	65.1	2.13
117	65.2	0.08
118	65.3	0
119	65.9	0
120	66	0.3
121	66.1	0.65
122	66.2	0.58
123	66.3	0.37
124	66.4	0.73
125	66.5	1.31
126	66.6	0.72
127	66.7	0
128	67.8	0
129	67.9	1.63
130	68	3.36
131	68.1	3.81
132	68.2	1.17
133	68.3	0
134	68.9	0
135	69	3.48
136	69.1	0
137	69.3	0
138	69.4	9.88
139	69.5	16.12
140	69.6	24.22
141	69.7	60.71
142	69.8	106.29
143	69.9	125.36
144	70	115.18
145	70.1	87.92
146	70.2	63.32
147	70.3	21.77
148	70.4	0
149	70.5	0
150	70.6	1.05
151	70.7	82.45
152	70.8	168.85
153	70.9	192.68
154	71	136.32
155	71.1	46.25
156	71.2	0
157	71.6	0
158	71.7	15.54
159	71.8	33.28
160	71.9	27.29
161	72	1.71
162	72.1	0
163	72.2	0
164	72.3	30.53
165	72.4	58.7
166	72.5	29.04
167	72.6	0
168	72.9	0
169	73	208.14
170	73.1	340.04
171	73.2	447.85
172	73.3	664.01
173	73.4	896.23
174	73.5	904.63
175	73.6	621.12
176	73.7	204.56
177	73.8	0
178	75	0
179	75.1	59.08
180	75.2	119.51
181	75.3	102.22
182	75.4	23.68
183	75.5	0
184	75.8	0
185	75.9	12.89
186	76	18.4
187	76.1	9.43
188	76.2	0
189	76.3	0
190	76.4	9.83
191	76.5	20.34
192	76.6	36.34
193	76.7	66.75
194	76.8	87.67
195	76.9	72.75
196	77	22.7
197	77.1	0
198	77.3	0
199	77.4	3.25
200	77.5	0
201	78.3	0
202	78.4	62.33
203	78.5	99.85
204	78.6	46.24
205	78.7	0
206	79	0
207	79.1	23.42
208	79.2	102.99
209	79.3	107.57
210	79.4	64.9
211	79.5	21.11
212	79.6	4.08
213	79.7	0
214	80.2	0
215	80.3	5.28
216	80.4	23.61
217	80.5	53.01
218	80.6	82.67
219	80.7	113
220	80.8	131.2
221	80.9	114.24
222	81	60.31
223	81.1	0
224	81.6	0
225	81.7	22.37
226	81.8	19.92
227	81.9	18.87
228	82	5.33
229	82.1	0
230	82.3	0
231	82.4	12.27
232	82.5	37.19
233	82.6	51.73
234	82.7	59.97
235	82.8	35.74
236	82.9	0
237	83.3	0
238	83.4	12.89
239	83.5	0
240	83.8	0
241	83.9	33.55
242	84	72.28
243	84.1	102.74
244	84.2	133.26
245	84.3	152.26
246	84.4	130.73
247	84.5	65.92
248	84.6	0
249	85	0
250	85.1	32.82
251	85.2	71.79
252	85.3	98.74
253	85.4	92.29
254	85.5	51.54
255	85.6	10.27
256	85.7	0
257	85.9	0
258	86	3.05
259	86.1	7.53
260	86.2	9.46
261	86.3	3.89
262	86.4	0
263	86.5	0
264	86.6	11.21
265	86.7	56.5
266	86.8	86.2
267	86.9	57.97
268	87	0
269	87.5	0
270	87.6	34.17
271	87.7	51.49
272	87.8	45.02
273	87.9	23.95
274	88	0
275	88.2	0
276	88.3	17.09
277	88.4	119.27
278	88.5	58.08
279	88.6	221.05
280	88.7	1088.06
281	88.8	2314.27
282	88.9	2767.35
283	89	1797.95
284	89.1	214.36
285	89.2	0
286	89.3	0
287	89.4	475.88
288	89.5	850.55
289	89.6	703.8
290	89.7	292.98
291	89.8	68.07
292	89.9	15.58
293	90	0
294	90.1	30.77
295	90.2	90.86
296	90.3	76.87
297	90.4	0
298	90.8	0
299	90.9	82.38
300	91	92.16
301	91.1	18.49
302	91.2	0
303	91.5	0
304	91.6	13.74
305	91.7	3.93
306	91.8	0
307	93.2	0
308	93.3	11.88
309	93.4	33.59
310	93.5	31.18
311	93.6	9.58
312	93.7	0
313	94.2	0
314	94.3	3.34
315	94.4	23.02
316	94.5	29.43
317	94.6	15.97
318	94.7	0
319	94.9	0
320	95	7.76
321	95.1	6.54
322	95.2	0
323	96	0
324	96.1	24.11
325	96.2	47.6
326	96.3	46.09
327	96.4	29.45
328	96.5	20.21
329	96.6	24.27
330	96.7	22.87
331	96.8	2.43
332	96.9	4.99
333	97	52.71
334	97.1	115.94
335	97.2	143.81
336	97.3	123.88
337	97.4	82.15
338	97.5	52.71
339	97.6	70.94
340	97.7	143.61
341	97.8	189.45
342	97.9	157.21
343	98	66.47
344	98.1	0
345	98.4	0
346	98.5	35.99
347	98.6	30.64
348	98.7	0
349	99.4	0
350	99.5	184.42
351	99.6	182.67
352	99.7	87.18
353	99.8	77.6
354	99.9	45.78
355	100	0
356	100.1	0
357	100.2	7.74
358	100.3	77.03
359	100.4	85.71
360	100.5	29.48
361	100.6	0
362	100.7	0
363	100.8	12.83
364	100.9	142.42
365	101	302.18
366	101.1	444.18
367	101.2	492.13
368	101.3	391.57
369	101.4	202.47
370	101.5	96.51
371	101.6	196.53
372	101.7	430.52
373	101.8	593.46
374	101.9	548.17
375	102	336.68
376	102.1	117.85
377	102.2	14.66
378	102.3	8.55
379	102.4	0
380	103.2	0
381	103.3	94.65
382	103.4	139.08
383	103.5	116.3
384	103.6	95.55
385	103.7	65.14
386	103.8	40.3
387	103.9	14.02
388	104	6.8
389	104.1	23.18
390	104.2	33.02
391	104.3	7.62
392	104.4	0
393	105	0
394	105.1	0.87
395	105.2	42.42
396	105.3	72.53
397	105.4	71.44
398	105.5	50.31
399	105.6	44.07
400	105.7	41.58
401	105.8	27.28
402	105.9	2.69
403	106	0
404	106.1	15.24
405	106.2	20.28
406	106.3	0
407	106.5	0
408	106.6	102.58
409	106.7	272.16
410	106.8	285.59
411	106.9	121.04
412	107	0
413	107.1	0
414	107.2	11.97
415	107.3	147.43
416	107.4	191.65
417	107.5	140.48
418	107.6	61.18
419	107.7	0
420	107.9	0
421	108	14.88
422	108.1	52.96
423	108.2	44.47
424	108.3	1.43
425	108.4	0
426	108.6	0
427	108.7	2.59
428	108.8	46.61
429	108.9	45.68
430	109	4.17
431	109.1	0
432	109.4	0
433	109.5	4.14
434	109.6	0
435	110.1	0
436	110.2	0.32
437	110.3	0
438	110.9	0
439	111	80.08
440	111.1	80.33
441	111.2	16.44
442	111.3	0
443	111.6	0
444	111.7	9.95
445	111.8	43.63
446	111.9	56.6
447	112	41.89
448	112.1	11.87
449	112.2	0
450	113.5	0
451	113.6	88.34
452	113.7	173.19
453	113.8	121.8
454	113.9	8.66
455	114	0
456	114.4	0
457	114.5	97.42
458	114.6	291.7
459	114.7	309.47
460	114.8	121.81
461	114.9	0
462	115.8	0
463	115.9	58.26
464	116	112.51
465	116.1	144.28
466	116.2	106.39
467	116.3	0
468	116.8	0
469	116.9	4.86
470	117	72.48
471	117.1	111.87
472	117.2	139.16
473	117.3	143.22
474	117.4	105.09
475	117.5	35.82
476	117.6	0
477	117.7	0
478	117.8	5.02
479	117.9	10.98
480	118	1.35
481	118.1	0
482	119.7	0
483	119.8	9.95
484	119.9	0
485	120	3.79
486	120.1	25.54
487	120.2	39.21
488	120.3	36.18
489	120.4	56.02
490	120.5	81.62
491	120.6	113.58
492	120.7	149.13
493	120.8	183.32
494	120.9	180.92
495	121	131.42
496	121.1	104.03
497	121.2	148.38
498	121.3	191.3
499	121.4	141.21
500	121.5	28.4
501	121.6	0
502	122.2	0
503	122.3	34.16
504	122.4	73.75
505	122.5	84.77
506	122.6	72.91
507	122.7	64.12
508	122.8	59.85
509	122.9	52.83
510	123	20.08
511	123.1	0
512	123.3	0
513	123.4	7.03
514	123.5	7.76
515	123.6	6.66
516	123.7	22.24
517	123.8	24.9
518	123.9	6.81
519	124	0
520	124.7	0
521	124.8	70.22
522	124.9	131
523	125	119.96
524	125.1	47.15
525	125.2	0
526	125.4	0
527	125.5	0.05
528	125.6	21.47
529	125.7	44.29
530	125.8	59.54
531	125.9	60.23
532	126	43.71
533	126.1	26.4
534	126.2	17.45
535	126.3	25.35
536	126.4	41.6
537	126.5	29.8
538	126.6	0
539	127.5	0
540	127.6	30.78
541	127.7	48.18
542	127.8	53.91
543	127.9	46.04
544	128	28.34
545	128.1	9.07
546	128.2	1.93
547	128.3	13.71
548	128.4	67.08
549	128.5	133.37
550	128.6	144.91
551	128.7	80.6
552	128.8	0
553	129.1	0
554	129.2	58.53
555	129.3	143.15
556	129.4	146.77
557	129.5	72.52
558	129.6	0
559	130.6	0
560	130.7	48.44
561	130.8	164.11
562	130.9	256.46
563	131	278
564	131.1	213.78
565	131.2	91.81
566	131.3	0
567	131.5	0
568	131.6	3.24
569	131.7	44.36
570	131.8	49.79
571	131.9	56.48
572	132	51.99
573	132.1	43.43
574	132.2	32.38
575	132.3	26.9
576	132.4	28.35
577	132.5	26.79
578	132.6	2.44
579	132.7	0
580	133.2	0
581	133.3	30.18
582	133.4	111.11
583	133.5	140.53
584	133.6	85.41
585	133.7	0
586	134.3	0
587	134.4	35.36
588	134.5	76.96
589	134.6	69.07
590	134.7	0
591	135.7	0
592	135.8	32.61
593	135.9	74.06
594	136	89.16
595	136.1	59.28
596	136.2	0
597	136.7	0
598	136.8	3.84
599	136.9	282.96
600	137	411.9
601	137.1	342.6
602	137.2	250.84
603	137.3	217.86
604	137.4	157.3
605	137.5	39.62
606	137.6	0
607	137.7	0
608	137.8	5.27
609	137.9	7.46
610	138	0
611	138.8	0
612	138.9	9.59
613	139	11.75
614	139.1	17.3
615	139.2	38.63
616	139.3	26.82
617	139.4	0
618	139.8	0
619	139.9	16.28
620	140	22.61
621	140.1	19.07
622	140.2	36.59
623	140.3	58.34
624	140.4	54.8
625	140.5	25.88
626	140.6	0
627	141.8	0
628	141.9	18.26
629	142	64.17
630	142.1	101.34
631	142.2	97.27
632	142.3	53
633	142.4	21.11
634	142.5	52.45
635	142.6	116
636	142.7	141.3
637	142.8	84.88
638	142.9	0
639	143.3	0
640	143.4	45.96
641	143.5	58.41
642	143.6	46.61
643	143.7	38.54
644	143.8	33.38
645	143.9	26.53
646	144	23.1
647	144.1	12.85
648	144.2	0
649	144.6	0
650	144.7	32.33
651	144.8	43.33
652	144.9	32.74
653	145	0
654	145.2	0
655	145.3	34.28
656	145.4	128.48
657	145.5	119.56
658	145.6	20.8
659	145.7	0
660	145.8	0
661	145.9	36.04
662	146	56.73
663	146.1	52.16
664	146.2	56.54
665	146.3	70.52
666	146.4	69.54
667	146.5	65.79
668	146.6	75.99
669	146.7	83.96
670	146.8	60.05
671	146.9	20
672	147	12.87
673	147.1	41.84
674	147.2	53.09
675	147.3	14.46
676	147.4	0
677	148.3	0
678	148.4	9.73
679	148.5	55.61
680	148.6	80.95
681	148.7	70.48
682	148.8	44.81
683	148.9	41.38
684	149	52.66
685	149.1	52.73
686	149.2	39.34
687	149.3	28.16
688	149.4	9.7
689	149.5	0
690	150.2	0
691	150.3	5.5
692	150.4	32.56
693	150.5	55.74
694	150.6	66.14
695	150.7	48.5
696	150.8	12
697	150.9	0
698	151.7	0
699	151.8	11.24
700	151.9	16.27
701	152	13.26
702	152.1	9.13
703	152.2	22.08
704	152.3	34.66
705	152.4	60.42
706	152.5	144.67
707	152.6	248.81
708	152.7	337.57
709	152.8	321.28
710	152.9	154.11
711	153	0
712	153.2	0
713	153.3	3.29
714	153.4	52.68
715	153.5	9.44
716	153.6	0
717	153.8	0
718	153.9	21.66
719	154	30.68
720	154.1	12.01
721	154.2	3.95
722	154.3	33.05
723	154.4	81.93
724	154.5	93.28
725	154.6	50.64
726	154.7	0
727	156.4	0
728	156.5	48.94
729	156.6	107.25
730	156.7	59.84
731	156.8	0
732	157	0
733	157.1	64.06
734	157.2	45.06
735	157.3	0
736	157.5	0
737	157.6	35.2
738	157.7	51.07
739	157.8	33.95
740	157.9	18.54
741	158	18.52
742	158.1	5.01
743	158.2	0
744	158.8	0
745	158.9	3.18
746	159	39.39
747	159.1	58.07
748	159.2	34.62
749	159.3	0
750	160	0
751	160.1	22.68
752	160.2	69.9
753	160.3	80.87
754	160.4	85.12
755	160.5	116.85
756	160.6	154.22
757	160.7	68.85
758	160.8	0
759	161.2	0
760	161.3	9.55
761	161.4	8.89
762	161.5	30.86
763	161.6	34.01
764	161.7	14.01
765	161.8	0
766	162.1	0
767	162.2	30.17
768	162.3	207.84
769	162.4	608.18
770	162.5	1237.55
771	162.6	1983.63
772	162.7	2656.09
773	162.8	3046.54
774	162.9	3106.74
775	163	2970.29
776	163.1	2746.97
777	163.2	2352.31
778	163.3	1694.06
779	163.4	922.91
780	163.5	381.62
781	163.6	205.19
782	163.7	232.63
783	163.8	270.26
784	163.9	271.52
785	164	239.16
786	164.1	186.62
787	164.2	123.85
788	164.3	60.49
789	164.4	10.74
790	164.5	0
791	164.6	0
792	164.7	30.83
793	164.8	53.28
794	164.9	47.85
795	165	26.97
796	165.1	17.03
797	165.2	14.89
798	165.3	19.17
799	165.4	18.17
800	165.5	8.71
801	165.6	0.31
802	165.7	0
803	166	0
804	166.1	12.9
805	166.2	21.07
806	166.3	5.1
807	166.4	0
808	166.9	0
809	167	15.28
810	167.1	10.44
811	167.2	0
812	168.4	0
813	168.5	7.34
814	168.6	29.69
815	168.7	47.04
816	168.8	47.97
817	168.9	30.16
818	169	3.64
819	169.1	0
820	169.4	0
821	169.5	15.29
822	169.6	47.74
823	169.7	59.38
824	169.8	44.89
825	169.9	25.74
826	170	23.55
827	170.1	27.04
828	170.2	26.36
829	170.3	33.76
830	170.4	8.09
831	170.5	0
832	170.7	0
833	170.8	92.84
834	170.9	74.47
835	171	0
836	172.2	0
837	172.3	0.43
838	172.4	4.39
839	172.5	0
840	172.8	0
841	172.9	22.8
842	173	44.04
843	173.1	44.27
844	173.2	40.62
845	173.3	33.17
846	173.4	16.82
847	173.5	6.7
848	173.6	2.53
849	173.7	0
850	174	0
851	174.1	33.81
852	174.2	72.07
853	174.3	107.74
854	174.4	148.33
855	174.5	186.66
856	174.6	210.3
857	174.7	194.73
858	174.8	123.67
859	174.9	11.35
860	175	0
861	175.6	0
862	175.7	4.07
863	175.8	5.54
864	175.9	0
865	176.5	0
866	176.6	68.34
867	176.7	146.4
868	176.8	132.84
869	176.9	72.9
870	177	73.94
871	177.1	145.39
872	177.2	204.01
873	177.3	194.48
874	177.4	132.66
875	177.5	56.68
876	177.6	1.29
877	177.7	0
878	177.8	12.9
879	177.9	37.21
880	178	38.19
881	178.1	18.1
882	178.2	0
883	178.7	0
884	178.8	15.13
885	178.9	0
886	179.1	0
887	179.2	25.83
888	179.3	51.34
889	179.4	41.68
890	179.5	18.82
891	179.6	23.73
892	179.7	33.07
893	179.8	26.87
894	179.9	7.77
895	180	0
896	180.2	0
897	180.3	24.57
898	180.4	53.24
899	180.5	60.87
900	180.6	55.2
901	180.7	49.01
902	180.8	47.41
903	180.9	51
904	181	41.14
905	181.1	0
906	181.4	0
907	181.5	7.18
908	181.6	32.09
909	181.7	35.78
910	181.8	28.94
911	181.9	24.89
912	182	28.42
913	182.1	29.61
914	182.2	15.43
915	182.3	0
916	182.6	0
917	182.7	25.8
918	182.8	28.17
919	182.9	0
920	183.3	0
921	183.4	0.6
922	183.5	13.81
923	183.6	17.35
924	183.7	17.15
925	183.8	6.52
926	183.9	0
927	184.2	0
928	184.3	7.17
929	184.4	11.11
930	184.5	1.58
931	184.6	0
932	186.5	0
933	186.6	17.38
934	186.7	35.54
935	186.8	32.76
936	186.9	10.08
937	187	0
938	187.9	0
939	188	3.13
940	188.1	7.89
941	188.2	2.44
942	188.3	0
943	189	0
944	189.1	4.32
945	189.2	34.94
946	189.3	24.81
947	189.4	0
948	189.7	0
949	189.8	2.92
950	189.9	23.43
951	190	24.92
952	190.1	25.24
953	190.2	41
954	190.3	67.67
955	190.4	82.18
956	190.5	74.71
957	190.6	57.4
958	190.7	29.96
959	190.8	2.76
960	190.9	0
961	191.2	0
962	191.3	71.07
963	191.4	93.71
964	191.5	52.59
965	191.6	9.42
966	191.7	0.78
967	191.8	21.44
968	191.9	46.19
969	192	40.72
970	192.1	9.67
971	192.2	0
972	192.7	0
973	192.8	15.27
974	192.9	29.98
975	193	52.31
976	193.1	94.69
977	193.2	126.47
978	193.3	100.59
979	193.4	23.68
980	193.5	0
981	193.8	0
982	193.9	36.32
983	194	38.19
984	194.1	25.78
985	194.2	43.62
986	194.3	90.49
987	194.4	143.55
988	194.5	194.37
989	194.6	240.39
990	194.7	306.96
991	194.8	406.76
992	194.9	497.69
993	195	506.9
994	195.1	395.91
995	195.2	220.36
996	195.3	85.77
997	195.4	23.93
998	195.5	20.39
999	195.6	19.66
1000	195.7	22.31
1001	195.8	31.16
1002	195.9	39.96
1003	196	49.67
1004	196.1	62.77
1005	196.2	70.28
1006	196.3	60.77
1007	196.4	28.36
1008	196.5	0
1009	197.1	0
1010	197.2	13.73
1011	197.3	29.37
1012	197.4	36.31
1013	197.5	37.95
1014	197.6	30.96
1015	197.7	21.45
1016	197.8	5.7
1017	197.9	0
1018	198.1	0
1019	198.2	3.94
1020	198.3	32.51
1021	198.4	62.84
1022	198.5	84.46
1023	198.6	83.35
1024	198.7	53.28
1025	198.8	6.97
1026	198.9	0
1027	199	0
1028	199.1	8.49
1029	199.2	11.92
1030	199.3	0
1031	199.7	0
1032	199.8	21.48
1033	199.9	16.94
1034	200	0
1035	200.7	0
1036	200.8	10.56
1037	200.9	19.96
1038	201	40.29
1039	201.1	67.91
1040	201.2	73.16
1041	201.3	50.32
1042	201.4	23.71
1043	201.5	20.85
1044	201.6	17.14
1045	201.7	27.61
1046	201.8	67.73
1047	201.9	129.98
1048	202	176.87
1049	202.1	177.02
1050	202.2	144.26
1051	202.3	113.1
1052	202.4	86.18
1053	202.5	60.05
1054	202.6	47.15
1055	202.7	57.52
1056	202.8	71.19
1057	202.9	56.98
1058	203	19.4
1059	203.1	0
1060	203.2	13.74
1061	203.3	41.89
1062	203.4	48.95
1063	203.5	30.29
1064	203.6	3.59
1065	203.7	0
1066	204.2	0
1067	204.3	7.36
1068	204.4	64.18
1069	204.5	91.95
1070	204.6	38.54
1071	204.7	0
1072	205.1	0
1073	205.2	8.83
1074	205.3	51.23
1075	205.4	62.16
1076	205.5	35.66
1077	205.6	19.67
1078	205.7	18.04
1079	205.8	0
1080	206	0
1081	206.1	42.42
1082	206.2	94.86
1083	206.3	115.62
1084	206.4	100.85
1085	206.5	28.77
1086	206.6	0
1087	207.9	0
1088	208	13.57
1089	208.1	27.4
1090	208.2	21.85
1091	208.3	17.62
1092	208.4	19.03
1093	208.5	52.53
1094	208.6	117.19
1095	208.7	166.13
1096	208.8	166.29
1097	208.9	155.58
1098	209	173.24
1099	209.1	195.18
1100	209.2	170.2
1101	209.3	106.52
1102	209.4	60.94
1103	209.5	57.03
1104	209.6	50.29
1105	209.7	38.3
1106	209.8	20.5
1107	209.9	10.8
1108	210	19.72
1109	210.1	36.29
1110	210.2	44.41
1111	210.3	35.58
1112	210.4	14.23
1113	210.5	0
1114	210.9	0
1115	211	2.93
1116	211.1	32.69
1117	211.2	45.42
1118	211.3	42.75
1119	211.4	31.42
1120	211.5	16.72
1121	211.6	13.56
1122	211.7	20.96
1123	211.8	24.26
1124	211.9	11.11
1125	212	0
1126	212.3	0
1127	212.4	8.82
1128	212.5	37.19
1129	212.6	72.63
1130	212.7	79.15
1131	212.8	39.69
1132	212.9	0
1133	213	0
1134	213.1	26.07
1135	213.2	53.16
1136	213.3	51.35
1137	213.4	38.9
1138	213.5	27.22
1139	213.6	12.98
1140	213.7	7.2
1141	213.8	14.28
1142	213.9	21.07
1143	214	18.29
1144	214.1	9.85
1145	214.2	2.66
1146	214.3	0
1147	214.9	0
1148	215	24.84
1149	215.1	47.48
1150	215.2	49
1151	215.3	32.65
1152	215.4	12.51
1153	215.5	0.06
1154	215.6	0
1155	215.7	2.57
1156	215.8	11.82
1157	215.9	20.23
1158	216	24.07
1159	216.1	36.55
1160	216.2	78.7
1161	216.3	172.43
1162	216.4	330.45
1163	216.5	556.92
1164	216.6	829.72
1165	216.7	1075.58
1166	216.8	1218.31
1167	216.9	1236.59
1168	217	1168.8
1169	217.1	1043.16
1170	217.2	842.28
1171	217.3	581.66
1172	217.4	328.29
1173	217.5	171.48
1174	217.6	145.87
1175	217.7	194.74
1176	217.8	254.94
1177	217.9	257.87
1178	218	179.37
1179	218.1	65.71
1180	218.2	0
1181	218.5	0
1182	218.6	30.87
1183	218.7	43.71
1184	218.8	8.23
1185	218.9	0
1186	219.1	0
1187	219.2	8.51
1188	219.3	0
1189	219.6	0
1190	219.7	0.96
1191	219.8	4.19
1192	219.9	7.21
1193	220	10.61
1194	220.1	13.9
1195	220.2	15.35
1196	220.3	9.89
1197	220.4	0
1198	220.9	0
1199	221	62.36
1200	221.1	105.54
1201	221.2	78.2
1202	221.3	28.3
1203	221.4	17.42
1204	221.5	20.33
1205	221.6	6.43
1206	221.7	0
1207	221.8	1.02
1208	221.9	17.69
1209	222	29.02
1210	222.1	18.36
1211	222.2	0
1212	222.4	0
1213	222.5	8.66
1214	222.6	85.74
1215	222.7	0
1216	222.9	0
1217	223	188.29
1218	223.1	661.78
1219	223.2	861.66
1220	223.3	620.63
1221	223.4	204.81
1222	223.5	0
1223	223.6	0
1224	223.7	18.65
1225	223.8	49.2
1226	223.9	114.52
1227	224	197.55
1228	224.1	246.13
1229	224.2	232.08
1230	224.3	155.36
1231	224.4	26.43
1232	224.5	0
1233	224.7	0
1234	224.8	40.63
1235	224.9	106.22
1236	225	70.53
1237	225.1	0
1238	225.3	0
1239	225.4	101.25
1240	225.5	126.39
1241	225.6	42.59
1242	225.7	0
1243	226.3	0
1244	226.4	9.9
1245	226.5	28.78
1246	226.6	49.94
1247	226.7	82.61
1248	226.8	116.25
1249	226.9	128.19
1250	227	98.83
1251	227.1	51.09
1252	227.2	23.73
1253	227.3	22.62
1254	227.4	23.31
1255	227.5	14.09
1256	227.6	3.88
1257	227.7	4.21
1258	227.8	13.14
1259	227.9	17.86
1260	228	7.47
1261	228.1	0
1262	228.3	0
1263	228.4	0.15
1264	228.5	43.2
1265	228.6	86.34
1266	228.7	115.31
1267	228.8	127.72
1268	228.9	113.13
1269	229	73.45
1270	229.1	25.06
1271	229.2	0
1272	229.5	0
1273	229.6	1.94
1274	229.7	9.37
1275	229.8	20.17
1276	229.9	32.51
1277	230	43.27
1278	230.1	47.72
1279	230.2	41.42
1280	230.3	22.76
1281	230.4	1.34
1282	230.5	0
1283	230.8	0
1284	230.9	1.87
1285	231	17.08
1286	231.1	35.34
1287	231.2	60.45
1288	231.3	77.63
1289	231.4	69.16
1290	231.5	35.64
1291	231.6	0
1292	232.5	0
1293	232.6	8.27
1294	232.7	15.14
1295	232.8	27.13
1296	232.9	39.35
1297	233	40.33
1298	233.1	29.68
1299	233.2	18.89
1300	233.3	13.99
1301	233.4	12.73
1302	233.5	15.5
1303	233.6	19.56
1304	233.7	23.96
1305	233.8	23.88
1306	233.9	17.67
1307	234	10.35
1308	234.1	7.44
1309	234.2	5.48
1310	234.3	0
1311	234.4	0
1312	234.5	6.62
1313	234.6	18.86
1314	234.7	10.11
1315	234.8	0
1316	235.2	0
1317	235.3	3.17
1318	235.4	13.49
1319	235.5	23.76
1320	235.6	40.65
1321	235.7	60.29
1322	235.8	77.03
1323	235.9	77.83
1324	236	51.6
1325	236.1	16.09
1326	236.2	10.95
1327	236.3	37.34
1328	236.4	54.71
1329	236.5	58.09
1330	236.6	62.43
1331	236.7	71.88
1332	236.8	56.36
1333	236.9	16.83
1334	237	0
1335	237.5	0
1336	237.6	3.56
1337	237.7	17.92
1338	237.8	20.48
1339	237.9	12.76
1340	238	0
1341	238.3	0
1342	238.4	12.18
1343	238.5	35.31
1344	238.6	60.3
1345	238.7	66.26
1346	238.8	47.96
1347	238.9	25.81
1348	239	25.33
1349	239.1	44.88
1350	239.2	59.69
1351	239.3	48.53
1352	239.4	20.5
1353	239.5	0
1354	240.1	0
1355	240.2	5.75
1356	240.3	27.28
1357	240.4	58.68
1358	240.5	75.3
1359	240.6	59.75
1360	240.7	31.08
1361	240.8	34.26
1362	240.9	75.96
1363	241	116.02
1364	241.1	111.67
1365	241.2	64.05
1366	241.3	9.93
1367	241.4	0
1368	241.5	0
1369	241.6	3.65
1370	241.7	14.64
1371	241.8	8.91
1372	241.9	0
1373	243	0
1374	243.1	0.61
1375	243.2	10
1376	243.3	16.57
1377	243.4	20.66
1378	243.5	25.86
1379	243.6	31.76
1380	243.7	34.15
1381	243.8	29.15
1382	243.9	22.47
1383	244	23.94
1384	244.1	47.21
1385	244.2	90.05
1386	244.3	121.06
1387	244.4	108.68
1388	244.5	62.9
1389	244.6	22.08
1390	244.7	9.74
1391	244.8	9.32
1392	244.9	5.03
1393	245	0
1394	245.1	0.98
1395	245.2	32.68
1396	245.3	98.91
1397	245.4	397.4
1398	245.5	1287.97
1399	245.6	2729.64
1400	245.7	4339.39
1401	245.8	5769.31
1402	245.9	6921.31
1403	246	7861.9
1404	246.1	8649.42
1405	246.2	9204.29
1406	246.3	9114.91
1407	246.4	7792.12
1408	246.5	5263.18
1409	246.6	2578.44
1410	246.7	966.7
1411	246.8	658.69
1412	246.9	1021.82
1413	247	1366.61
1414	247.1	1487.08
1415	247.2	1424.36
1416	247.3	1220.44
1417	247.4	886.87
1418	247.5	506.64
1419	247.6	218.33
1420	247.7	98.35
1421	247.8	60.22
1422	247.9	47.59
1423	248	47.01
1424	248.1	64.16
1425	248.2	85.18
1426	248.3	83.75
1427	248.4	58.33
1428	248.5	39.78
1429	248.6	38.99
1430	248.7	37.04
1431	248.8	33.02
1432	248.9	26.94
1433	249	21.32
1434	249.1	10.37
1435	249.2	0
1436	250	0
1437	250.1	11.4
1438	250.2	21.27
1439	250.3	21.77
1440	250.4	16.07
1441	250.5	13.13
1442	250.6	16.69
1443	250.7	20.51
1444	250.8	16.06
1445	250.9	2.39
1446	251	0
1447	251.3	0
1448	251.4	11.14
1449	251.5	18.27
1450	251.6	14.98
1451	251.7	7.32
1452	251.8	0
1453	252.1	0
1454	252.2	0.71
1455	252.3	0
1456	252.5	0
1457	252.6	11.34
1458	252.7	41.14
1459	252.8	40.65
1460	252.9	4.62
1461	253	0
1462	253.2	0
1463	253.3	0.54
1464	253.4	1.81
1465	253.5	0
1466	253.9	0
1467	254	2.61
1468	254.1	6.77
1469	254.2	5.19
1470	254.3	0
1471	254.7	0
1472	254.8	4.65
1473	254.9	12.45
1474	255	13.24
1475	255.1	10.46
1476	255.2	9.4
1477	255.3	9.7
1478	255.4	8.49
1479	255.5	7.8
1480	255.6	9.59
1481	255.7	11.97
1482	255.8	12.43
1483	255.9	11.91
1484	256	10.19
1485	256.1	5.99
1486	256.2	0
1487	256.4	0
1488	256.5	9.05
1489	256.6	25.88
1490	256.7	39.09
1491	256.8	40.23
1492	256.9	24.4
1493	257	0.23
1494	257.1	0
1495	258.3	0
1496	258.4	3.96
1497	258.5	9.39
1498	258.6	6.48
1499	258.7	0
1500	259.7	0
1501	259.8	2.62
1502	259.9	2.92
1503	260	1.86
1504	260.1	6.95
1505	260.2	23.79
1506	260.3	43.33
1507	260.4	48.96
1508	260.5	33.94
1509	260.6	9.99
1510	260.7	0
1511	260.9	0
1512	261	0.5
1513	261.1	0
1514	261.2	0
1515	261.3	4.74
1516	261.4	30.94
1517	261.5	64.6
1518	261.6	91.97
1519	261.7	124.47
1520	261.8	184.66
1521	261.9	258.82
1522	262	301.94
1523	262.1	282.89
1524	262.2	218.79
1525	262.3	144.88
1526	262.4	84.07
1527	262.5	33.4
1528	262.6	0.64
1529	262.7	0
1530	262.8	0
1531	262.9	8.13
1532	263	41.05
1533	263.1	56.98
1534	263.2	44.02
1535	263.3	19.88
1536	263.4	9.45
1537	263.5	10.28
1538	263.6	7.09
1539	263.7	3.76
1540	263.8	14.45
1541	263.9	38.88
1542	264	58.18
1543	264.1	57.04
1544	264.2	38.86
1545	264.3	19.91
1546	264.4	7.07
1547	264.5	5.94
1548	264.6	6.87
1549	264.7	4.72
1550	264.8	0
1551	265.4	0
1552	265.5	6.72
1553	265.6	14.85
1554	265.7	10.38
1555	265.8	4.29
1556	265.9	8.13
1557	266	21.75
1558	266.1	29.45
1559	266.2	22.35
1560	266.3	7.45
1561	266.4	0
1562	266.5	0
1563	266.6	1.05
1564	266.7	6.73
1565	266.8	14.21
1566	266.9	17.82
1567	267	13.07
1568	267.1	3.43
1569	267.2	0
1570	267.6	0
1571	267.7	2.71
1572	267.8	11.4
1573	267.9	13.08
1574	268	9.41
1575	268.1	4.67
1576	268.2	1.68
1577	268.3	0.07
1578	268.4	0
1579	268.5	0
1580	268.6	6.1
1581	268.7	19.57
1582	268.8	35.15
1583	268.9	40.76
1584	269	28.83
1585	269.1	7.08
1586	269.2	0
1587	269.6	0
1588	269.7	2.53
1589	269.8	8.03
1590	269.9	7.14
1591	270	0
1592	270.2	0
1593	270.3	1.59
1594	270.4	14.77
1595	270.5	22.46
1596	270.6	20.49
1597	270.7	9.67
1598	270.8	0
1599	271.4	0
1600	271.5	10.12
1601	271.6	14.41
1602	271.7	8.76
1603	271.8	0
1604	272.3	0
1605	272.4	4.99
1606	272.5	4.22
1607	272.6	0
1608	272.8	0
1609	272.9	9.28
1610	273	21.41
1611	273.1	21.52
1612	273.2	12.5
1613	273.3	2.3
1614	273.4	0
1615	273.6	0
1616	273.7	0.41
1617	273.8	0.79
1618	273.9	0
1619	274.3	0
1620	274.4	0.6
1621	274.5	5.89
1622	274.6	12.34
1623	274.7	15.12
1624	274.8	10.89
1625	274.9	1.81
1626	275	0
1627	275.5	0
1628	275.6	5.26
1629	275.7	8.35
1630	275.8	0
1631	276.3	0
1632	276.4	7.58
1633	276.5	29.78
1634	276.6	62.56
1635	276.7	96.63
1636	276.8	119.36
1637	276.9	126.41
1638	277	113.5
1639	277.1	79.72
1640	277.2	36.07
1641	277.3	4.17
1642	277.4	0
1643	278.4	0
1644	278.5	2.11
1645	278.6	11.12
1646	278.7	17.47
1647	278.8	19.17
1648	278.9	15.73
1649	279	15.86
1650	279.1	17.9
1651	279.2	11.7
1652	279.3	0
1653	279.8	0
1654	279.9	17
1655	280	41.64
1656	280.1	43.25
1657	280.2	12.59
1658	280.3	14.63
1659	280.4	72.57
1660	280.5	142.47
1661	280.6	132.74
1662	280.7	3.9
1663	280.8	0
1664	282	0
1665	282.1	4.77
1666	282.2	79.71
1667	282.3	101.61
1668	282.4	78.93
1669	282.5	52.61
1670	282.6	40.22
1671	282.7	43.87
1672	282.8	51.92
1673	282.9	56.34
1674	283	73.96
1675	283.1	101.05
1676	283.2	103.72
1677	283.3	70.18
1678	283.4	26.33
1679	283.5	13.9
1680	283.6	16.52
1681	283.7	19.95
1682	283.8	25.85
1683	283.9	23.64
1684	284	7.88
1685	284.1	0
1686	284.3	0
1687	284.4	0.94
1688	284.5	0.74
1689	284.6	0
1690	284.9	0
1691	285	2.92
1692	285.1	9.71
1693	285.2	10.96
1694	285.3	8.04
1695	285.4	5.2
1696	285.5	1.2
1697	285.6	0
1698	285.9	0
1699	286	0.29
1700	286.1	0
1701	286.8	0
1702	286.9	13.95
1703	287	32.86
1704	287.1	37.28
1705	287.2	23.5
1706	287.3	5.69
1707	287.4	0
1708	288.4	0
1709	288.5	2.45
1710	288.6	15.2
1711	288.7	23.03
1712	288.8	18.5
1713	288.9	3.49
1714	289	0
1715	289.2	0
1716	289.3	18.6
1717	289.4	132.25
1718	289.5	426.6
1719	289.6	1051.01
1720	289.7	1974.68
1721	289.8	3027.26
1722	289.9	3915.66
1723	290	4427.16
1724	290.1	4601.71
1725	290.2	4582.73
1726	290.3	4297.57
1727	290.4	3513.31
1728	290.5	2278.78
1729	290.6	1097.28
1730	290.7	468.97
1731	290.8	408.86
1732	290.9	592.54
1733	291	748.18
1734	291.1	761.84
1735	291.2	690.52
1736	291.3	593.36
1737	291.4	459.22
1738	291.5	283.25
1739	291.6	126.66
1740	291.7	61.59
1741	291.8	66.94
1742	291.9	97.71
1743	292	104.4
1744	292.1	78.53
1745	292.2	46.62
1746	292.3	27.98
1747	292.4	22.88
1748	292.5	15.04
1749	292.6	0
1750	293.4	0
1751	293.5	0.82
1752	293.6	0.75
1753	293.7	0
1754	294.2	0
1755	294.3	0.68
1756	294.4	11.34
1757	294.5	13.82
1758	294.6	5.73
1759	294.7	0
1760	294.9	0
1761	295	4.8
1762	295.1	7.58
1763	295.2	9.38
1764	295.3	8.59
1765	295.4	4.95
1766	295.5	0.53
1767	295.6	0
1768	296	0
1769	296.1	33.44
1770	296.2	101.7
1771	296.3	160.78
1772	296.4	147.21
1773	296.5	66.92
1774	296.6	0
1775	296.8	0
1776	296.9	8.13
1777	297	237.71
1778	297.1	416.58
1779	297.2	414.88
1780	297.3	233.59
1781	297.4	0
1782	297.8	0
1783	297.9	26.54
1784	298	27.02
1785	298.1	29.12
1786	298.2	74.77
1787	298.3	90.21
1788	298.4	33.56
1789	298.5	0
1790	298.6	0
1791	298.7	61.31
1792	298.8	191.23
1793	298.9	304.37
1794	299	335.92
1795	299.1	285.34
1796	299.2	208.15
1797	299.3	143.03
1798	299.4	94.9
1799	299.5	65.16
1800	299.6	64.73
1801	299.7	71.75
1802	299.8	63.91
1803	299.9	46.3
1804	300	30.35
1805	300.1	20.67
1806	300.2	12.59
1807	300.3	4.78
1808	300.4	0
1809	301.1	0
1810	301.2	9.77
1811	301.3	17.64
1812	301.4	16.38
1813	301.5	13.78
1814	301.6	15.24
1815	301.7	19.75
1816	301.8	17
1817	301.9	5.22
1818	302	0
1819	302.1	0
1820	302.2	6.5
1821	302.3	12.07
1822	302.4	7.68
1823	302.5	0
1824	303.2	0
1825	303.3	0.1
1826	303.4	1.98
1827	303.5	3.89
1828	303.6	3.78
1829	303.7	0
1830	304.3	0
1831	304.4	4.7
1832	304.5	7.42
1833	304.6	7.3
1834	304.7	6.08
1835	304.8	6.38
1836	304.9	7.91
1837	305	8.59
1838	305.1	8.6
1839	305.2	9.44
1840	305.3	10.65
1841	305.4	10.86
1842	305.5	14.64
1843	305.6	32.45
1844	305.7	63.05
1845	305.8	92.25
1846	305.9	101.47
1847	306	85.52
1848	306.1	62.43
1849	306.2	48.96
1850	306.3	43.14
1851	306.4	34.29
1852	306.5	19.38
1853	306.6	7
1854	306.7	1.61
1855	306.8	4.96
1856	306.9	14.48
1857	307	16.45
1858	307.1	6.32
1859	307.2	0
1860	307.5	0
1861	307.6	1.39
1862	307.7	4.65
1863	307.8	8.22
1864	307.9	8.82
1865	308	4.93
1866	308.1	0
1867	309.6	0
1868	309.7	1.34
1869	309.8	7.87
1870	309.9	12.61
1871	310	13.1
1872	310.1	8.02
1873	310.2	0.79
1874	310.3	0
1875	310.5	0
1876	310.6	7.65
1877	310.7	16.13
1878	310.8	17.28
1879	310.9	12.79
1880	311	8.72
1881	311.1	6.95
1882	311.2	5.47
1883	311.3	2.61
1884	311.4	0.4
1885	311.5	0
1886	311.7	0
1887	311.8	1.47
1888	311.9	2.92
1889	312	2.48
1890	312.1	0.23
1891	312.2	0
1892	312.4	0
1893	312.5	3.03
1894	312.6	9.99
1895	312.7	15.93
1896	312.8	14.57
1897	312.9	0
1898	313.5	0
1899	313.6	4.99
1900	313.7	10.22
1901	313.8	11.37
1902	313.9	6.31
1903	314	0
1904	314.4	0
1905	314.5	7.06
1906	314.6	5.84
1907	314.7	0.47
1908	314.8	0
1909	314.9	12.46
1910	315	30.83
1911	315.1	38.41
1912	315.2	28.82
1913	315.3	12.55
1914	315.4	3.88
1915	315.5	2.78
1916	315.6	1.6
1917	315.7	0.44
1918	315.8	0
1919	316	0
1920	316.1	1.11
1921	316.2	3.93
1922	316.3	7.42
1923	316.4	11.57
1924	316.5	14.39
1925	316.6	13.44
1926	316.7	10.07
1927	316.8	9.09
1928	316.9	12.17
1929	317	15.02
1930	317.1	12.77
1931	317.2	7.15
1932	317.3	2.37
1933	317.4	0.6
1934	317.5	0.02
1935	317.6	0
1936	318.3	0
1937	318.4	1.68
1938	318.5	2.34
1939	318.6	0.06
1940	318.7	0
1941	319.1	0
1942	319.2	3.67
1943	319.3	4.27
1944	319.4	1.09
1945	319.5	0
1946	320.4	0
1947	320.5	0.39
1948	320.6	0.05
1949	320.7	0.51
1950	320.8	3.43
1951	320.9	5.81
1952	321	3.94
1953	321.1	0
1954	321.4	0
1955	321.5	0.64
1956	321.6	0.84
1957	321.7	0
1958	322.7	0
1959	322.8	5.24
1960	322.9	13.38
1961	323	12.27
1962	323.1	4.92
1963	323.2	0
1964	323.3	0
1965	323.4	1.96
1966	323.5	3.46
1967	323.6	2.66
1968	323.7	0.83
1969	323.8	0
1970	324.4	0
1971	324.5	1.52
1972	324.6	3.91
1973	324.7	5.61
1974	324.8	5.62
1975	324.9	4.24
1976	325	2.65
1977	325.1	1.47
1978	325.2	0.46
1979	325.3	0
1980	326	0
1981	326.1	1.02
1982	326.2	3.25
1983	326.3	3.58
1984	326.4	3.05
1985	326.5	5.04
1986	326.6	9.37
1987	326.7	10.56
1988	326.8	4.96
1989	326.9	0
1990	327.6	0
1991	327.7	4.16
1992	327.8	13.49
1993	327.9	19.95
1994	328	18.33
1995	328.1	10.16
1996	328.2	1.62
1997	328.3	0
[truncated: 1,874 more rows]

## Sheet: Sheet7
+ESI Scan (rt: 9.24-9.66 min, 92 scans) Frag=100.0V CF=0.000 DF=0.000 4608-02.d Subtract
Index	X	Y
0	50	0
1	50.1	0.52
2	50.2	1.32
3	50.3	1.28
4	50.4	0.54
5	50.5	0
6	50.8	0
7	50.9	0.11
8	51	0.05
9	51.1	0.01
10	51.2	0.24
11	51.3	0.64
12	51.4	0.91
13	51.5	0.87
14	51.6	0.54
15	51.7	0.2
16	51.8	0.17
17	51.9	0.41
18	52	0.43
19	52.1	0
20	52.4	0
21	52.5	0.06
22	52.6	0
23	52.8	0
24	52.9	0.24
25	53	0.3
26	53.1	0
27	54.1	0
28	54.2	0.22
29	54.3	2.49
30	54.4	4.81
31	54.5	3.72
32	54.6	0.84
33	54.7	0
34	54.8	0
35	54.9	1.6
36	55	52
37	55.1	104.99
38	55.2	113.66
39	55.3	64.35
40	55.4	0
41	55.8	0
42	55.9	1.53
43	56	0
44	57	0
45	57.1	77.96
46	57.2	173.23
47	57.3	221.09
48	57.4	187.89
49	57.5	85.75
50	57.6	0
51	58.4	0
52	58.5	9.54
53	58.6	189.45
54	58.7	422.94
55	58.8	594.28
56	58.9	510.81
57	59	139.28
58	59.1	0
59	60.7	0
60	60.8	102.55
61	60.9	304.96
62	61	321.37
63	61.1	136.3
64	61.2	0
65	61.5	0
66	61.6	173.48
67	61.7	146.15
68	61.8	0
69	62.1	0
70	62.2	7.82
71	62.3	15.75
72	62.4	0
73	62.6	0
74	62.7	3.13
75	62.8	22.12
76	62.9	24.76
77	63	14.63
78	63.1	0.52
79	63.2	0
80	63.3	0.27
81	63.4	9.65
82	63.5	18.57
83	63.6	23.28
84	63.7	18.39
85	63.8	2.07
86	63.9	0
87	64.6	0
88	64.7	2.13
89	64.8	1.88
90	64.9	0.65
91	65	0.96
92	65.1	2.25
93	65.2	3.09
94	65.3	2.6
95	65.4	1.35
96	65.5	0.58
97	65.6	0.61
98	65.7	0.8
99	65.8	0.57
100	65.9	0
101	66	0
102	66.3	0
103	66.4	0.19
104	66.5	0.38
105	66.6	0.06
106	66.7	0
107	66.9	0
108	67	1.5
109	67.1	2.21
110	67.2	1.1
111	67.3	0
112	67.4	0
113	67.5	0.52
114	67.6	0.86
115	67.7	0.44
116	67.8	0.72
117	67.9	2.76
118	68	5.17
119	68.1	5.19
120	68.2	2.92
121	68.3	1.81
122	68.4	4.8
123	68.5	10.1
124	68.6	14.62
125	68.7	29.28
126	68.8	67.97
127	68.9	109.71
128	69	106.43
129	69.1	40.16
130	69.2	0
131	69.5	0
132	69.6	17.2
133	69.7	16.76
134	69.8	0
135	70.3	0
136	70.4	10.33
137	70.5	16.03
138	70.6	14.83
139	70.7	12.23
140	70.8	0
141	72.5	0
142	72.6	27.55
143	72.7	131.88
144	72.8	110.23
145	72.9	0
146	73.1	0
147	73.2	62.7
148	73.3	138.98
149	73.4	20.63
150	73.5	0
151	73.6	0
152	73.7	80.48
153	73.8	29.66
154	73.9	0
155	74.5	0
156	74.6	16.91
157	74.7	121.34
158	74.8	119.99
159	74.9	19.87
160	75	0
161	75.7	0
162	75.8	8.11
163	75.9	10.23
164	76	2.78
165	76.1	0
166	76.4	0
167	76.5	0.35
168	76.6	14.96
169	76.7	25.58
170	76.8	16.91
171	76.9	0
172	77.1	0
173	77.2	19.71
174	77.3	66.8
175	77.4	74.9
176	77.5	43.1
177	77.6	0
178	78.3	0
179	78.4	18.08
180	78.5	99.07
181	78.6	74.02
182	78.7	51.07
183	78.8	79.06
184	78.9	93.05
185	79	50.74
186	79.1	0
187	79.5	0
188	79.6	2.72
189	79.7	24.46
190	79.8	45.55
191	79.9	45.43
192	80	22.03
193	80.1	0
194	81.5	0
195	81.6	7.91
196	81.7	51.78
197	81.8	35.1
198	81.9	0
199	82.3	0
200	82.4	0.5
201	82.5	4.87
202	82.6	0
203	83.4	0
204	83.5	22.82
205	83.6	15.76
206	83.7	0
207	85.5	0
208	85.6	13.69
209	85.7	19.15
210	85.8	2.24
211	85.9	0
212	86.4	0
213	86.5	14.42
214	86.6	37.26
215	86.7	57.21
216	86.8	77.14
217	86.9	85.24
218	87	68.03
219	87.1	9.84
220	87.2	0
221	87.7	0
222	87.8	3.81
223	87.9	26.85
224	88	38.42
225	88.1	8.68
226	88.2	0
227	89.7	0
228	89.8	32.1
229	89.9	65.7
230	90	0
231	90.3	0
232	90.4	40.39
233	90.5	121.65
234	90.6	64.57
235	90.7	0
236	90.9	0
237	91	8.17
238	91.1	6.44
239	91.2	0
240	91.8	0
241	91.9	3.46
242	92	9.83
243	92.1	13.55
244	92.2	6.7
245	92.3	0
246	92.4	0
247	92.5	2.13
248	92.6	33.02
249	92.7	58.98
250	92.8	52.27
251	92.9	12.88
252	93	0
253	93.2	0
254	93.3	25.05
255	93.4	43.2
256	93.5	34.08
257	93.6	8.46
258	93.7	0
259	94.2	0
260	94.3	9.06
261	94.4	18.56
262	94.5	19.45
263	94.6	0
264	95.9	0
265	96	17.78
266	96.1	34.2
267	96.2	21.71
268	96.3	0
269	96.5	0
270	96.6	12.35
271	96.7	40.89
272	96.8	45.57
273	96.9	5.73
274	97	0
275	97.3	0
276	97.4	65.67
277	97.5	82.7
278	97.6	48.99
279	97.7	12.01
280	97.8	4.49
281	97.9	37.61
282	98	74.31
283	98.1	70.1
284	98.2	25.3
285	98.3	0
286	98.4	0
287	98.5	67.21
288	98.6	180.19
289	98.7	179.26
290	98.8	0
291	99.5	0
292	99.6	62.77
293	99.7	67.49
294	99.8	36.86
295	99.9	0
296	100.7	0
297	100.8	36.03
298	100.9	156.25
299	101	228.67
300	101.1	213.66
301	101.2	116.29
302	101.3	20.84
303	101.4	57.2
304	101.5	245.45
305	101.6	378.48
306	101.7	200.41
307	101.8	0
308	102.3	0
309	102.4	0.37
310	102.5	0
311	102.7	0
312	102.8	5.51
313	102.9	30.09
314	103	21.22
315	103.1	0
316	103.7	0
317	103.8	25.17
318	103.9	54.38
319	104	57.04
320	104.1	37.83
321	104.2	16.97
322	104.3	4.95
323	104.4	0.64
324	104.5	7.01
325	104.6	15.38
326	104.7	14.24
327	104.8	2.08
328	104.9	0
329	105.4	0
330	105.5	32.8
331	105.6	49.8
332	105.7	64.19
333	105.8	93.09
334	105.9	131.84
335	106	168.77
336	106.1	195.89
337	106.2	209.07
338	106.3	193.85
339	106.4	146.34
340	106.5	103.95
341	106.6	95.84
342	106.7	161.11
343	106.8	225.53
344	106.9	203.55
345	107	163.42
346	107.1	224.41
347	107.2	346.58
348	107.3	370.93
349	107.4	247.08
350	107.5	79.1
351	107.6	0.49
352	107.7	0
353	107.8	23.57
354	107.9	81.43
355	108	107.54
356	108.1	80.95
357	108.2	9.2
358	108.3	0
359	108.7	0
360	108.8	0.97
361	108.9	0
362	109.4	0
363	109.5	5.77
364	109.6	25.75
365	109.7	18.87
366	109.8	14.07
367	109.9	16.19
368	110	21.5
369	110.1	22.02
370	110.2	14.02
371	110.3	11.47
372	110.4	16.96
373	110.5	3.76
374	110.6	0
375	111.1	0
376	111.2	76.34
377	111.3	161.22
378	111.4	133.35
379	111.5	45.12
380	111.6	0
381	111.7	0
382	111.8	1.6
383	111.9	5.72
384	112	5.58
385	112.1	4.07
386	112.2	0
387	112.4	0
388	112.5	4.79
389	112.6	0
390	112.7	0
391	112.8	4.07
392	112.9	0
393	114.2	0
394	114.3	98.17
395	114.4	140.66
396	114.5	81.86
397	114.6	0
398	115.3	0
399	115.4	15.69
400	115.5	56.38
401	115.6	16.26
402	115.7	0
403	118	0
404	118.1	18.21
405	118.2	26.78
406	118.3	0
407	118.6	0
408	118.7	72.79
409	118.8	174.19
410	118.9	159.36
411	119	79.87
412	119.1	23.3
413	119.2	14.93
414	119.3	23.65
415	119.4	21.24
416	119.5	0
417	119.8	0
418	119.9	4.16
419	120	20.06
420	120.1	41.87
421	120.2	57.14
422	120.3	54.98
423	120.4	39.31
424	120.5	38.71
425	120.6	0
426	121.7	0
427	121.8	113.02
428	121.9	217.13
429	122	237.05
430	122.1	145.42
431	122.2	31.29
432	122.3	0
433	123.3	0
434	123.4	13.68
435	123.5	47.93
436	123.6	45.22
437	123.7	0
438	124.5	0
439	124.6	8.98
440	124.7	67.64
441	124.8	103.54
442	124.9	74.97
443	125	4.98
444	125.1	0
445	127.6	0
446	127.7	20.48
447	127.8	29.95
448	127.9	12.13
449	128	0
450	128.4	0
451	128.5	19.27
452	128.6	39.45
453	128.7	23.64
454	128.8	0
455	129.1	0
456	129.2	26.96
457	129.3	54.62
458	129.4	52.51
459	129.5	40.47
460	129.6	44.57
461	129.7	38.43
462	129.8	13.77
463	129.9	0
464	130.4	0
465	130.5	16.48
466	130.6	96.14
467	130.7	112.2
468	130.8	84.09
469	130.9	116.5
470	131	213.34
471	131.1	221.44
472	131.2	62.2
473	131.3	0
474	131.8	0
475	131.9	9.52
476	132	0
477	132.7	0
478	132.8	6.96
479	132.9	14.51
480	133	0
481	134.3	0
482	134.4	47.14
483	134.5	122.32
484	134.6	142.82
485	134.7	117.98
486	134.8	97
487	134.9	123.99
488	135	170.53
489	135.1	179.36
490	135.2	129.42
491	135.3	61.62
492	135.4	14.7
493	135.5	0
494	135.7	0
495	135.8	16.84
496	135.9	47.65
497	136	51.13
498	136.1	7.48
499	136.2	0
500	137.3	0
501	137.4	64.79
502	137.5	65.27
503	137.6	51.06
504	137.7	41.42
505	137.8	63.17
506	137.9	83.52
507	138	87.4
508	138.1	68.27
509	138.2	10.87
510	138.3	0
511	139	0
512	139.1	10.59
513	139.2	32.48
514	139.3	26.62
515	139.4	9.09
516	139.5	0
517	139.6	0.48
518	139.7	0
519	140.4	0
520	140.5	12.47
521	140.6	0
522	141.1	0
523	141.2	6.57
524	141.3	0
525	141.4	0
526	141.5	7.5
527	141.6	72.01
528	141.7	75.84
529	141.8	9.04
530	141.9	0
531	142.1	0
532	142.2	2.19
533	142.3	14.34
534	142.4	56.57
535	142.5	110.67
536	142.6	121.42
537	142.7	61.11
538	142.8	0
539	143.3	0
540	143.4	10.71
541	143.5	13.84
542	143.6	10.91
543	143.7	10.25
544	143.8	0
545	144.3	0
546	144.4	25.75
547	144.5	0
548	144.9	0
549	145	168.33
550	145.1	154.95
551	145.2	0
552	145.6	0
553	145.7	11.91
554	145.8	44.24
555	145.9	22.82
556	146	19.48
557	146.1	7.16
558	146.2	0
559	146.6	0
560	146.7	34.63
561	146.8	30.89
562	146.9	0
563	148.3	0
564	148.4	0.21
565	148.5	20.91
566	148.6	53.78
567	148.7	64.95
568	148.8	22.57
569	148.9	0
570	149.3	0
571	149.4	39.83
572	149.5	64.4
573	149.6	56.3
574	149.7	33.1
575	149.8	11.42
576	149.9	0
577	150.2	0
578	150.3	1.3
579	150.4	34.43
580	150.5	47.06
581	150.6	34.93
582	150.7	3.3
583	150.8	0
584	151	0
585	151.1	21.92
586	151.2	45.1
587	151.3	53.46
588	151.4	36.75
589	151.5	0
590	152.3	0
591	152.4	28.48
592	152.5	110.54
593	152.6	173.96
594	152.7	240.28
595	152.8	285.41
596	152.9	227.1
597	153	67.32
598	153.1	0
599	153.2	0
600	153.3	78.93
601	153.4	145.53
602	153.5	132.03
603	153.6	85.09
604	153.7	34.62
605	153.8	22.1
606	153.9	36.8
607	154	85.11
608	154.1	139.21
609	154.2	148.9
610	154.3	93.92
611	154.4	23.81
612	154.5	0
613	155.2	0
614	155.3	4.25
615	155.4	19.59
616	155.5	6.82
617	155.6	0
618	156	0
619	156.1	66.16
620	156.2	103.48
621	156.3	65.81
622	156.4	0
623	157.5	0
624	157.6	118.02
625	157.7	249.96
626	157.8	302.03
627	157.9	289.27
628	158	257.06
629	158.1	225.15
630	158.2	189.42
631	158.3	142.76
632	158.4	75.25
633	158.5	0
634	158.8	0
635	158.9	27.95
636	159	19.18
637	159.1	0
638	159.3	0
639	159.4	14
640	159.5	20.89
641	159.6	0.64
642	159.7	0
643	160.3	0
644	160.4	30.6
645	160.5	87.24
646	160.6	114.24
647	160.7	107.02
648	160.8	71.05
649	160.9	1.81
650	161	0
651	161.2	0
652	161.3	93.68
653	161.4	121.45
654	161.5	79.03
655	161.6	39.1
656	161.7	12.19
657	161.8	0
658	162.8	0
659	162.9	60.9
660	163	54.71
661	163.1	0
662	163.5	0
663	163.6	5.42
664	163.7	6.32
665	163.8	3.66
666	163.9	2.16
667	164	3.24
668	164.1	6.36
669	164.2	6.46
670	164.3	3.81
671	164.4	0
672	164.5	4.26
673	164.6	19.83
674	164.7	35.35
675	164.8	35.74
676	164.9	18.96
677	165	0
678	165.6	0
679	165.7	7.29
680	165.8	21.21
681	165.9	28.19
682	166	25.61
683	166.1	16.45
684	166.2	5.88
685	166.3	0
686	167.8	0
687	167.9	0.51
688	168	0
689	168.2	0
690	168.3	5.38
691	168.4	17.48
692	168.5	31.7
693	168.6	44.86
694	168.7	41.23
695	168.8	11.22
696	168.9	0
697	169.3	0
698	169.4	7.68
699	169.5	18.86
700	169.6	32.39
701	169.7	41.58
702	169.8	33.66
703	169.9	15.23
704	170	0.9
705	170.1	3.66
706	170.2	21.23
707	170.3	56.15
708	170.4	75.76
709	170.5	41.77
710	170.6	0
711	171.1	0
712	171.2	8.44
713	171.3	0
714	172.9	0
715	173	2.91
716	173.1	0
717	173.4	0
718	173.5	13.33
719	173.6	31.73
720	173.7	38.71
721	173.8	37.61
722	173.9	25.83
723	174	0
724	174.8	0
725	174.9	0.27
726	175	74.12
727	175.1	75.62
728	175.2	16.17
729	175.3	0
730	176.6	0
731	176.7	32.48
732	176.8	99.91
733	176.9	107.77
734	177	48.43
735	177.1	0
736	177.2	0
737	177.3	0.1
738	177.4	22.85
739	177.5	14.76
740	177.6	0
741	177.7	0
742	177.8	11.96
743	177.9	6.49
744	178	0
745	178.1	0
746	178.2	6.73
747	178.3	35.5
748	178.4	39.19
749	178.5	22.39
750	178.6	0
751	179	0
752	179.1	21.6
753	179.2	32.06
754	179.3	0
755	179.8	0
756	179.9	0.56
757	180	10.15
758	180.1	7.39
759	180.2	0.36
760	180.3	3.21
761	180.4	21.77
762	180.5	35.58
763	180.6	22.2
764	180.7	0
765	181.5	0
766	181.6	7.52
767	181.7	0.23
768	181.8	0
769	182	0
770	182.1	0.35
771	182.2	0
772	183.7	0
773	183.8	3.92
774	183.9	20.14
775	184	27.21
776	184.1	16.97
777	184.2	0
778	184.9	0
779	185	5.99
780	185.1	26.24
781	185.2	37.72
782	185.3	36.69
783	185.4	37.52
784	185.5	73.09
785	185.6	171.46
786	185.7	313.74
787	185.8	479.67
788	185.9	628.51
789	186	729.08
790	186.1	759.34
791	186.2	706.13
792	186.3	563.8
793	186.4	360.9
794	186.5	171.67
795	186.6	46.59
796	186.7	0
797	187	0
798	187.1	6.6
799	187.2	107
800	187.3	163.79
801	187.4	144.29
802	187.5	79.54
803	187.6	21.91
804	187.7	0
805	187.8	0
806	187.9	7.89
807	188	12.97
808	188.1	16.04
809	188.2	23.69
810	188.3	23.47
811	188.4	0
812	188.9	0
813	189	21.36
814	189.1	65.25
815	189.2	59.77
816	189.3	27.1
817	189.4	12.6
818	189.5	11.3
819	189.6	11.11
820	189.7	13.58
821	189.8	12.66
822	189.9	3.29
823	190	0
824	191.6	0
825	191.7	17.2
826	191.8	32.06
827	191.9	27.91
828	192	2.21
829	192.1	0
830	192.8	0
831	192.9	9.39
832	193	0
833	193.2	0
834	193.3	22.71
835	193.4	45.05
836	193.5	19.62
837	193.6	0
838	193.7	0
839	193.8	6.2
840	193.9	11.49
841	194	1.07
842	194.1	0
843	194.2	0
844	194.3	21.05
845	194.4	41.53
846	194.5	49.72
847	194.6	33.42
848	194.7	3.88
849	194.8	0
850	198.4	0
851	198.5	3.56
852	198.6	0
853	203.5	0
854	203.6	2.6
855	203.7	3.2
856	203.8	0
857	204	0
858	204.1	2.67
859	204.2	0
860	204.6	0
861	204.7	61.96
862	204.8	124.27
863	204.9	127.32
864	205	82.28
865	205.1	15.74
866	205.2	0
867	205.7	0
868	205.8	10.58
869	205.9	10.07
870	206	1.65
871	206.1	0
872	206.2	5.37
873	206.3	0
874	207.1	0
875	207.2	12.67
876	207.3	0
877	207.6	0
878	207.7	8.67
879	207.8	49.33
880	207.9	69.39
881	208	56.11
882	208.1	18.68
883	208.2	0
884	208.5	0
885	208.6	10.82
886	208.7	7.26
887	208.8	0
888	209.7	0
889	209.8	7.99
890	209.9	17.43
891	210	14.22
892	210.1	0
893	210.9	0
894	211	2.98
895	211.1	0
896	213.1	0
897	213.2	22.82
898	213.3	39.02
899	213.4	19.31
900	213.5	0
901	214.7	0
902	214.8	3.34
903	214.9	2.98
904	215	0
905	215.9	0
906	216	6.26
907	216.1	7.94
908	216.2	0.78
909	216.3	0
910	216.4	5.59
911	216.5	11.9
912	216.6	0
913	217.4	0
914	217.5	19.71
915	217.6	44.01
916	217.7	48.73
917	217.8	31.78
918	217.9	5.03
919	218	0
920	218.2	0
921	218.3	21.47
922	218.4	31.12
923	218.5	13.48
924	218.6	0
925	219	0
926	219.1	1.49
927	219.2	7.08
928	219.3	0
929	219.8	0
930	219.9	1.41
931	220	3.51
932	220.1	1.55
933	220.2	0
934	220.8	0
935	220.9	12.33
936	221	0
937	221.7	0
938	221.8	1.47
939	221.9	21.42
940	222	26.83
941	222.1	31.88
942	222.2	0
943	222.3	0
944	222.4	74.36
945	222.5	359.77
946	222.6	539.76
947	222.7	390.84
948	222.8	47.55
949	222.9	0
950	223	0
951	223.1	19.03
952	223.2	0
953	224.7	0
954	224.8	29.62
955	224.9	30.05
956	225	0
957	225.4	0
958	225.5	33.48
959	225.6	50.68
960	225.7	68.14
961	225.8	51.15
962	225.9	10.01
963	226	0
964	226.6	0
965	226.7	3.97
966	226.8	7.55
967	226.9	5.03
968	227	0
969	227.6	0
970	227.7	18.04
971	227.8	77.48
972	227.9	147.02
973	228	174.69
974	228.1	136.4
975	228.2	69.49
976	228.3	24.98
977	228.4	3.23
978	228.5	0
979	228.9	0
980	229	14.5
981	229.1	11.59
982	229.2	8.53
983	229.3	39.04
984	229.4	203.32
985	229.5	821.51
986	229.6	2012.89
987	229.7	3505.64
988	229.8	5027.98
989	229.9	6441.86
990	230	7595.23
991	230.1	8270.42
992	230.2	8342.44
993	230.3	7730.09
994	230.4	6270.68
995	230.5	4069.37
996	230.6	1873.62
997	230.7	572.33
998	230.8	362.9
999	230.9	691.53
1000	231	1067.34
1001	231.1	1279.49
1002	231.2	1304.49
1003	231.3	1133.97
1004	231.4	803.83
1005	231.5	440.83
1006	231.6	169.79
1007	231.7	42.22
1008	231.8	17.9
1009	231.9	29.84
1010	232	38.86
1011	232.1	39.62
1012	232.2	39.41
1013	232.3	40.95
1014	232.4	44.41
1015	232.5	40.95
1016	232.6	21.8
1017	232.7	0
1018	234.9	0
1019	235	26.71
1020	235.1	34.96
1021	235.2	15.84
1022	235.3	0
1023	236.4	0
1024	236.5	8.09
1025	236.6	20.25
1026	236.7	21.45
1027	236.8	16.63
1028	236.9	20.56
1029	237	22.02
1030	237.1	7.33
1031	237.2	0
1032	237.3	0
1033	237.4	6.12
1034	237.5	8.78
1035	237.6	0
1036	238	0
1037	238.1	8.83
1038	238.2	10.95
1039	238.3	7.53
1040	238.4	1.25
1041	238.5	0
1042	239	0
1043	239.1	9.7
1044	239.2	38.27
1045	239.3	35.11
1046	239.4	16.75
1047	239.5	2.31
1048	239.6	0.9
1049	239.7	12.34
1050	239.8	34.42
1051	239.9	45.79
1052	240	31.39
1053	240.1	2.79
1054	240.2	0
1055	240.3	0
1056	240.4	9
1057	240.5	9.44
1058	240.6	0
1059	241.4	0
1060	241.5	6.21
1061	241.6	22.36
1062	241.7	42.9
1063	241.8	73.41
1064	241.9	110.91
1065	242	149.07
1066	242.1	173.1
1067	242.2	169.75
1068	242.3	142.77
1069	242.4	106.48
1070	242.5	70.62
1071	242.6	33.69
1072	242.7	0.52
1073	242.8	0
1074	243.2	0
1075	243.3	12.66
1076	243.4	29.66
1077	243.5	48.08
1078	243.6	79.76
1079	243.7	136.59
1080	243.8	221.13
1081	243.9	320.4
1082	244	398
1083	244.1	415.32
1084	244.2	372.24
1085	244.3	306.05
1086	244.4	242.93
1087	244.5	178.07
1088	244.6	102.35
1089	244.7	37.81
1090	244.8	0.67
1091	244.9	0
1092	245	20.05
1093	245.1	51.11
1094	245.2	68.53
1095	245.3	55.29
1096	245.4	14.53
1097	245.5	0
1098	247.6	0
1099	247.7	24.7
1100	247.8	50.35
1101	247.9	55.11
1102	248	44.21
1103	248.1	19.15
1104	248.2	0
1105	248.4	0
1106	248.5	10.77
1107	248.6	31.77
1108	248.7	49.61
1109	248.8	48.04
1110	248.9	20.36
1111	249	0
1112	249.1	0
1113	249.2	3.38
1114	249.3	11.49
1115	249.4	0
1116	251.1	0
1117	251.2	27.32
1118	251.3	42.22
1119	251.4	36.64
1120	251.5	23.07
1121	251.6	8.42
1122	251.7	0
1123	252.4	0
1124	252.5	3.88
1125	252.6	26.26
1126	252.7	53.93
1127	252.8	70.83
1128	252.9	66.53
1129	253	48.66
1130	253.1	30.53
1131	253.2	18.81
1132	253.3	11.25
1133	253.4	4.75
1134	253.5	1.21
1135	253.6	0
1136	253.7	2.3
1137	253.8	13.12
1138	253.9	23.66
1139	254	23.73
1140	254.1	13.91
1141	254.2	4.24
1142	254.3	0.5
1143	254.4	0
1144	259.2	0
1145	259.3	5.35
1146	259.4	6.44
1147	259.5	0
1148	260.4	0
1149	260.5	3.53
1150	260.6	5.82
1151	260.7	0.21
1152	260.8	0
1153	261.5	0
1154	261.6	12.72
1155	261.7	27.94
1156	261.8	27.15
1157	261.9	15.32
1158	262	11.3
1159	262.1	22.81
1160	262.2	37.4
1161	262.3	34.08
1162	262.4	6.45
1163	262.5	0
1164	263.2	0
1165	263.3	4.06
1166	263.4	9.13
1167	263.5	1.47
1168	263.6	0
1169	264.3	0
1170	264.4	4.51
1171	264.5	6.59
1172	264.6	0
1173	266.3	0
1174	266.4	7.75
1175	266.5	8.59
1176	266.6	8.12
1177	266.7	9.66
1178	266.8	11.9
1179	266.9	11.19
1180	267	7.91
1181	267.1	5.06
1182	267.2	3.06
1183	267.3	1.72
1184	267.4	5.69
1185	267.5	15.55
1186	267.6	22.43
1187	267.7	12.27
1188	267.8	0
1189	269.6	0
1190	269.7	3.06
1191	269.8	2.26
1192	269.9	0
1193	271.2	0
1194	271.3	3.49
1195	271.4	23.37
1196	271.5	31.87
1197	271.6	37.53
1198	271.7	73.01
1199	271.8	129.03
1200	271.9	165.48
1201	272	157.35
1202	272.1	130.67
1203	272.2	121.47
1204	272.3	129.26
1205	272.4	128.21
1206	272.5	105.66
1207	272.6	101.99
1208	272.7	146.48
1209	272.8	232.17
1210	272.9	377.31
1211	273	660.59
1212	273.1	917.82
1213	273.2	795.93
1214	273.3	633.16
1215	273.4	3439.19
1216	273.5	19756
1217	273.6	55709.8
1218	273.7	107278
1219	273.8	164135
1220	273.9	217484
1221	274	261337
1222	274.1	290890
1223	274.2	303112
1224	274.3	293382
1225	274.4	252893
1226	274.5	181117
1227	274.6	100177
1228	274.7	42693.7
1229	274.8	22961.6
1230	274.9	29219.4
1231	275	42183.4
1232	275.1	51303.2
1233	275.2	54659.3
1234	275.3	52317.8
1235	275.4	43657.3
1236	275.5	29698.8
1237	275.6	15044.4
1238	275.7	5159.51
1239	275.8	1817.75
1240	275.9	2474.38
1241	276	4073.39
1242	276.1	5101.3
1243	276.2	5423.21
1244	276.3	5181.53
1245	276.4	4330.47
1246	276.5	2909.37
1247	276.6	1363.79
1248	276.7	344.66
1249	276.8	99.61
1250	276.9	191.45
1251	277	301.88
1252	277.1	328.6
1253	277.2	280.87
1254	277.3	206.32
1255	277.4	124.79
1256	277.5	54.24
1257	277.6	18.2
1258	277.7	10.97
1259	277.8	11.27
1260	277.9	11.91
1261	278	4.92
1262	278.1	0
1263	278.3	0
1264	278.4	3.95
1265	278.5	4.6
1266	278.6	1.96
1267	278.7	7.29
1268	278.8	25.15
1269	278.9	37.49
1270	279	29.45
1271	279.1	8.66
1272	279.2	0
1273	279.3	0
1274	279.4	2.96
1275	279.5	6.6
1276	279.6	9.6
1277	279.7	12.06
1278	279.8	14.29
1279	279.9	14.01
1280	280	7.78
1281	280.1	0
1282	280.5	0
1283	280.6	134.42
1284	280.7	305.72
1285	280.8	339.09
1286	280.9	206.83
1287	281	29.9
1288	281.1	0
1289	281.2	0
1290	281.3	73.86
1291	281.4	59.06
1292	281.5	0
1293	281.7	0
1294	281.8	10.35
1295	281.9	22.65
1296	282	8.92
1297	282.1	3.06
1298	282.2	9.08
1299	282.3	11.88
1300	282.4	0
1301	282.6	0
1302	282.7	18.49
1303	282.8	36.57
1304	282.9	33.25
1305	283	3.28
1306	283.1	0
1307	284.1	0
1308	284.2	9.17
1309	284.3	12.26
1310	284.4	9.42
1311	284.5	1.45
1312	284.6	0
1313	285.1	0
1314	285.2	7.54
1315	285.3	8.41
1316	285.4	3.43
1317	285.5	0
1318	285.7	0
1319	285.8	12.69
1320	285.9	31.63
1321	286	43.33
1322	286.1	42.34
1323	286.2	35.54
1324	286.3	32.48
1325	286.4	32.77
1326	286.5	28.33
1327	286.6	15.51
1328	286.7	0
1329	289	0
1330	289.1	27.22
1331	289.2	66.7
1332	289.3	128.37
1333	289.4	355.29
1334	289.5	1283.19
1335	289.6	3472.78
1336	289.7	6752.66
1337	289.8	10632.9
1338	289.9	14408.7
1339	290	17327.3
1340	290.1	18970.1
1341	290.2	19423.8
1342	290.3	18619.7
1343	290.4	15901.2
1344	290.5	11118.1
1345	290.6	5837.15
1346	290.7	2320.31
1347	290.8	1348.76
1348	290.9	1841.61
1349	291	2501.67
1350	291.1	2847.26
1351	291.2	3005.17
1352	291.3	2998.6
1353	291.4	2609.25
1354	291.5	1770.45
1355	291.6	809.85
1356	291.7	181.9
1357	291.8	29.38
1358	291.9	75.29
1359	292	159.36
1360	292.1	225.54
1361	292.2	272.52
1362	292.3	288.29
1363	292.4	242.6
1364	292.5	136.82
1365	292.6	29.8
1366	292.7	0
1367	292.9	0
1368	293	3.33
1369	293.1	25.97
1370	293.2	32.23
1371	293.3	22.6
1372	293.4	8.85
1373	293.5	2.37
1374	293.6	1.91
1375	293.7	2.92
1376	293.8	3.48
1377	293.9	2.96
1378	294	0.5
1379	294.1	0
1380	294.8	0
1381	294.9	1.75
1382	295	3.13
1383	295.1	0
1384	295.2	0
1385	295.3	2.01
1386	295.4	28.71
1387	295.5	69.94
1388	295.6	114.69
1389	295.7	153.96
1390	295.8	200.42
1391	295.9	276.38
1392	296	343.4
1393	296.1	364.01
1394	296.2	318.57
1395	296.3	175.82
1396	296.4	0
1397	297.2	0
1398	297.3	71.71
1399	297.4	134.81
1400	297.5	0
1401	297.8	0
1402	297.9	22.51
1403	298	38.38
1404	298.1	39.39
1405	298.2	36.41
1406	298.3	0
1407	299	0
1408	299.1	7.52
1409	299.2	0
1410	299.6	0
1411	299.7	33.15
1412	299.8	122.28
1413	299.9	244.42
1414	300	349.11
1415	300.1	382.25
1416	300.2	342.89
1417	300.3	269.65
1418	300.4	196.73
1419	300.5	129.81
1420	300.6	70.48
1421	300.7	30.59
1422	300.8	13.91
1423	300.9	20.8
1424	301	25.82
1425	301.1	14.08
1426	301.2	0
1427	304.6	0
1428	304.7	0.06
1429	304.8	0
1430	305.5	0
1431	305.6	0.44
1432	305.7	0.01
1433	305.8	0
1434	306.8	0
1435	306.9	4.45
1436	307	3.06
1437	307.1	0
1438	307.4	0
1439	307.5	2.1
1440	307.6	2.42
1441	307.7	0
1442	308.3	0
1443	308.4	1.05
1444	308.5	4.26
1445	308.6	7.4
1446	308.7	6.51
1447	308.8	0
1448	309.1	0
1449	309.2	0.56
1450	309.3	10.56
1451	309.4	9.84
1452	309.5	3.61
1453	309.6	0
1454	309.7	0
1455	309.8	3.14
1456	309.9	7.87
1457	310	9.39
1458	310.1	7.16
1459	310.2	3.4
1460	310.3	0.43
1461	310.4	0
1462	310.7	0
1463	310.8	3.62
1464	310.9	14.06
1465	311	7.98
1466	311.1	0
1467	311.6	0
1468	311.7	0.17
1469	311.8	3.61
1470	311.9	6.01
1471	312	6.54
1472	312.1	5.57
1473	312.2	3.29
1474	312.3	0
1475	313	0
1476	313.1	1.43
1477	313.2	7.48
1478	313.3	7.8
1479	313.4	4.54
1480	313.5	1.33
1481	313.6	0
1482	313.8	0
1483	313.9	0.19
1484	314	1
1485	314.1	0.42
1486	314.2	0
1487	315	0
1488	315.1	4.35
1489	315.2	10.55
1490	315.3	10.29
1491	315.4	0
1492	316.6	0
1493	316.7	73.49
1494	316.8	105.07
1495	316.9	131.63
1496	317	263.77
1497	317.1	513.55
1498	317.2	585.11
1499	317.3	457.96
1500	317.4	928.69
1501	317.5	7372.86
1502	317.6	27950.4
1503	317.7	64600.7
1504	317.8	112787
1505	317.9	163337
1506	318	206427
1507	318.1	235562
1508	318.2	248965
1509	318.3	244167
1510	318.4	213732
1511	318.5	155533
1512	318.6	86680.6
1513	318.7	35603.8
1514	318.8	17327
1515	318.9	23596.7
1516	319	36910.1
1517	319.1	46327.2
1518	319.2	49764.2
1519	319.3	48167.5
1520	319.4	41483.8
1521	319.5	29794.1
1522	319.6	16147.1
1523	319.7	5716.46
1524	319.8	1527.33
1525	319.9	2020.74
1526	320	4093.98
1527	320.1	5598.05
1528	320.2	6174.46
1529	320.3	6092.88
1530	320.4	5361.37
1531	320.5	3894.51
1532	320.6	2070.77
1533	320.7	658.1
1534	320.8	123.8
1535	320.9	147.64
1536	321	292.29
1537	321.1	407.29
1538	321.2	459.51
1539	321.3	449.08
1540	321.4	349.24
1541	321.5	188.06
1542	321.6	56.92
1543	321.7	0.04
1544	321.8	0
1545	321.9	8.1
1546	322	18.76
1547	322.1	19.99
1548	322.2	15.35
1549	322.3	12.01
1550	322.4	11.62
1551	322.5	8.41
1552	322.6	0
1553	322.8	0
1554	322.9	0.62
1555	323	8.47
1556	323.1	7.17
1557	323.2	1.61
1558	323.3	0
1559	323.7	0
1560	323.8	0.17
1561	323.9	0.05
1562	324	0
1563	324.5	0
1564	324.6	0.38
1565	324.7	0.85
1566	324.8	0.73
1567	324.9	0.33
1568	325	0
1569	325.1	0
1570	325.2	0.06
1571	325.3	0
1572	325.4	0
1573	325.5	0.09
1574	325.6	2.37
1575	325.7	4.63
1576	325.8	4.85
1577	325.9	3.75
1578	326	3.76
1579	326.1	5.17
1580	326.2	5.59
1581	326.3	3.41
1582	326.4	0
1583	327.4	0
1584	327.5	4.11
1585	327.6	2.14
1586	327.7	0
1587	328	0
1588	328.1	2.04
1589	328.2	2.84
1590	328.3	2.24
1591	328.4	1.88
1592	328.5	3.14
1593	328.6	5.4
1594	328.7	6.27
1595	328.8	4.81
1596	328.9	3.31
1597	329	4.01
1598	329.1	5.46
1599	329.2	4.69
1600	329.3	1.94
1601	329.4	0
1602	329.5	0.18
1603	329.6	1.01
1604	329.7	1.01
1605	329.8	0
1606	330.2	0
1607	330.3	6.3
1608	330.4	13.17
1609	330.5	15.76
1610	330.6	11.99
1611	330.7	0.11
1612	330.8	0
1613	331.2	0
1614	331.3	1.19
1615	331.4	0
1616	332.6	0
1617	332.7	1.78
1618	332.8	0
1619	333.1	0
1620	333.2	0.47
1621	333.3	56.22
1622	333.4	199.53
1623	333.5	659.14
1624	333.6	1704.27
1625	333.7	3442.9
1626	333.8	5770.5
1627	333.9	8330.35
1628	334	10577.9
1629	334.1	12087.1
1630	334.2	12765.4
1631	334.3	12515.5
1632	334.4	10920.5
1633	334.5	7846.86
1634	334.6	4262.23
1635	334.7	1728.84
1636	334.8	983.63
1637	334.9	1421.46
1638	335	2038.6
1639	335.1	2314.16
1640	335.2	2264.27
1641	335.3	2033.2
1642	335.4	1661.21
1643	335.5	1147.41
1644	335.6	595.51
1645	335.7	214.88
1646	335.8	86.01
1647	335.9	125.71
1648	336	211.61
1649	336.1	257.45
1650	336.2	247.68
1651	336.3	207.81
1652	336.4	156.26
1653	336.5	95.92
1654	336.6	34.33
1655	336.7	0
1656	338.2	0
1657	338.3	2.84
1658	338.4	3.25
1659	338.5	0
1660	338.9	0
1661	339	2.83
1662	339.1	6.82
1663	339.2	6.86
1664	339.3	5.94
1665	339.4	14.99
1666	339.5	44.78
1667	339.6	95.29
1668	339.7	176.62
1669	339.8	311.95
1670	339.9	460.28
1671	340	548.71
1672	340.1	540.07
1673	340.2	461.75
1674	340.3	361.76
1675	340.4	263.54
1676	340.5	174.39
1677	340.6	96.16
1678	340.7	32.04
1679	340.8	0
1680	340.9	0
1681	341	5.98
1682	341.1	22.05
1683	341.2	26.24
1684	341.3	18.25
1685	341.4	8.49
1686	341.5	4.13
1687	341.6	3.76
1688	341.7	1.9
1689	341.8	0
1690	341.9	0
1691	342	0.02
1692	342.1	3.23
1693	342.2	4.75
1694	342.3	5.34
1695	342.4	6.57
1696	342.5	8.19
1697	342.6	11.22
1698	342.7	22.53
1699	342.8	54.63
1700	342.9	96.89
1701	343	119.45
1702	343.1	106.32
1703	343.2	83.52
1704	343.3	75.85
1705	343.4	71.01
1706	343.5	50.71
1707	343.6	20.26
1708	343.7	4.29
1709	343.8	9.71
1710	343.9	22.83
1711	344	34.72
1712	344.1	37.58
1713	344.2	33.98
1714	344.3	31.1
1715	344.4	30.24
1716	344.5	26.49
1717	344.6	15.31
1718	344.7	1.88
1719	344.8	0
1720	344.9	2.04
1721	345	10.68
1722	345.1	13.2
1723	345.2	7.35
1724	345.3	0.58
1725	345.4	0
1726	349.3	0
1727	349.4	0.02
1728	349.5	2.3
1729	349.6	4.64
1730	349.7	7.66
1731	349.8	8.53
1732	349.9	4.88
1733	350	0
1734	350.2	0
1735	350.3	4.46
1736	350.4	3.62
1737	350.5	0
1738	350.8	0
1739	350.9	0.64
1740	351	0
1741	351.7	0
1742	351.8	0.38
1743	351.9	0.41
1744	352	1.3
1745	352.1	3.29
1746	352.2	5.42
1747	352.3	5.89
1748	352.4	3.29
1749	352.5	0
1750	352.8	0
1751	352.9	3.99
1752	353	5.23
1753	353.1	1.47
1754	353.2	1.33
1755	353.3	2.42
1756	353.4	1.48
1757	353.5	0
1758	353.6	0.62
1759	353.7	2.58
1760	353.8	1.89
1761	353.9	0
1762	354	0.96
1763	354.1	7.63
1764	354.2	13.98
1765	354.3	16
1766	354.4	28.07
1767	354.5	47.98
1768	354.6	61.37
1769	354.7	51.04
1770	354.8	27.67
1771	354.9	7.56
1772	355	0
1773	355.6	0
1774	355.7	0.28
1775	355.8	2.99
1776	355.9	6.08
1777	356	8.06
1778	356.1	5.73
1779	356.2	0
1780	356.5	0
1781	356.6	2.23
1782	356.7	5.34
1783	356.8	5.81
1784	356.9	3.77
1785	357	2.52
1786	357.1	3.83
1787	357.2	5.21
1788	357.3	3.34
1789	357.4	0
1790	357.8	0
1791	357.9	7.44
1792	358	4.88
1793	358.1	0
1794	358.4	0
1795	358.5	0.26
1796	358.6	0
1797	358.8	0
1798	358.9	3.91
1799	359	8.01
1800	359.1	7.39
1801	359.2	3.46
1802	359.3	0.03
1803	359.4	0
1804	360.5	0
1805	360.6	5.14
1806	360.7	21.24
1807	360.8	47.64
1808	360.9	90.94
1809	361	156.68
1810	361.1	247.36
1811	361.2	274.01
1812	361.3	270.69
1813	361.4	556.91
1814	361.5	2759.53
1815	361.6	9606.63
1816	361.7	21941.5
1817	361.8	38775.5
1818	361.9	57593.5
1819	362	74701.7
1820	362.1	86721.7
1821	362.2	92484.3
1822	362.3	92001.7
1823	362.4	83541.4
1824	362.5	65154.6
1825	362.6	40458.6
1826	362.7	19157.3
1827	362.8	9097.86
1828	362.9	9735.72
1829	363	14786.7
1830	363.1	18951.5
1831	363.2	20745.1
1832	363.3	20594.2
1833	363.4	18526.1
1834	363.5	14232
1835	363.6	8526.92
1836	363.7	3584.2
1837	363.8	1191.58
1838	363.9	1142.26
1839	364	1948.22
1840	364.1	2539.94
1841	364.2	2700.98
1842	364.3	2653.26
1843	364.4	2429.11
1844	364.5	1894.74
1845	364.6	1093.93
1846	364.7	375.54
1847	364.8	66.18
1848	364.9	75.96
1849	365	162.96
1850	365.1	211.8
1851	365.2	192.07
1852	365.3	135.14
1853	365.4	71.93
1854	365.5	25.08
1855	365.6	2.3
1856	365.7	0
1857	366.2	0
1858	366.3	1
1859	366.4	2.85
1860	366.5	1.75
1861	366.6	0
1862	366.8	0
1863	366.9	7.42
1864	367	18.02
1865	367.1	23.13
1866	367.2	17.83
1867	367.3	7.02
1868	367.4	0
1869	367.6	0
1870	367.7	2.67
1871	367.8	4.65
1872	367.9	4.03
1873	368	1.88
1874	368.1	0
1875	368.8	0
1876	368.9	9.24
1877	369	20.16
1878	369.1	22.15
1879	369.2	13.04
1880	369.3	2.11
1881	369.4	0
1882	369.5	3.51
1883	369.6	5.95
1884	369.7	6.88
1885	369.8	9.92
1886	369.9	14.24
1887	370	11.77
1888	370.1	0
1889	370.5	0
1890	370.6	9.69
1891	370.7	92.3
1892	370.8	125
1893	370.9	48.98
1894	371	0
1895	371.4	0
1896	371.5	9.39
1897	371.6	23.31
1898	371.7	7.48
1899	371.8	0
1900	373.3	0
1901	373.4	12.73
1902	373.5	23.43
1903	373.6	8.21
1904	373.7	3.06
1905	373.8	22.28
1906	373.9	48.89
1907	374	59.65
1908	374.1	48.21
1909	374.2	28.56
1910	374.3	12.32
1911	374.4	0
1912	374.6	0
1913	374.7	10.9
1914	374.8	19.82
1915	374.9	15.89
1916	375	9.62
1917	375.1	12.8
1918	375.2	21.44
1919	375.3	22.34
1920	375.4	14.06
1921	375.5	4.29
1922	375.6	0
1923	376.5	0
1924	376.6	1.01
1925	376.7	5.34
1926	376.8	5.15
1927	376.9	1.13
1928	377	0
1929	377.3	0
1930	377.4	24.21
1931	377.5	120.23
1932	377.6	335.69
1933	377.7	711.17
1934	377.8	1226.83
1935	377.9	1780.55
1936	378	2239.04
1937	378.1	2553.37
1938	378.2	2748.57
1939	378.3	2762.56
1940	378.4	2420.24
1941	378.5	1686.62
1942	378.6	839.91
1943	378.7	266.14
1944	378.8	88.77
1945	378.9	113.26
1946	379	225.61
1947	379.1	347.49
1948	379.2	412.2
1949	379.3	379.5
1950	379.4	261.91
1951	379.5	125.12
1952	379.6	30.78
1953	379.7	0
1954	379.8	0
1955	379.9	11.03
1956	380	22.77
1957	380.1	28.84
1958	380.2	37.81
1959	380.3	52.05
1960	380.4	60.51
1961	380.5	47.86
1962	380.6	22.04
1963	380.7	0
1964	381.2	0
1965	381.3	2.03
1966	381.4	1.79
1967	381.5	1.38
1968	381.6	0.66
1969	381.7	0
1970	382.1	0
1971	382.2	0.87
1972	382.3	3.01
1973	382.4	0.28
1974	382.5	0
1975	383.3	0
1976	383.4	11.2
1977	383.5	59.03
1978	383.6	146.44
1979	383.7	263.58
1980	383.8	422.07
1981	383.9	620.21
1982	384	814.46
1983	384.1	924.67
1984	384.2	907.21
1985	384.3	784.26
1986	384.4	597.17
1987	384.5	380.03
1988	384.6	180.21
1989	384.7	58.75
1990	384.8	33.94
1991	384.9	57.73
1992	385	99.76
1993	385.1	133.69
1994	385.2	146.87
1995	385.3	131.46
1996	385.4	91.95
1997	385.5	44.86
[truncated: 1,450 more rows]

## Sheet: Sheet8
+ESI Scan (rt: 10.50-10.71 min, 47 scans) Frag=100.0V CF=0.000 DF=0.000 4608-02.d Subtract
Index	X	Y
0	50	0
1	50.7	0
2	50.8	0.52
3	50.9	1.43
4	51	1.82
5	51.1	1.52
6	51.2	0.95
7	51.3	0.6
8	51.4	0.5
9	51.5	0.34
10	51.6	0
11	52.1	0
12	52.2	0.18
13	52.3	0.33
14	52.4	0.47
15	52.5	0.39
16	52.6	0.04
17	52.7	0
18	52.8	0.1
19	52.9	0.65
20	53	0.95
21	53.1	0.79
22	53.2	0.36
23	53.3	0
24	54.4	0
25	54.5	12.69
26	54.6	32.2
27	54.7	77.28
28	54.8	119.26
29	54.9	104.46
30	55	36.52
31	55.1	0
32	55.2	0
33	55.3	17.56
34	55.4	29.49
35	55.5	6.32
36	55.6	0
37	56.2	0
38	56.3	1.4
39	56.4	7.67
40	56.5	5.36
41	56.6	7.66
42	56.7	0
43	57.1	0
44	57.2	154.69
45	57.3	205.61
46	57.4	121.79
47	57.5	0
48	59.1	0
49	59.2	57.34
50	59.3	0
51	60.1	0
52	60.2	25.39
53	60.3	171.5
54	60.4	297.8
55	60.5	264.08
56	60.6	4.43
57	60.7	0
58	60.9	0
59	61	452.42
60	61.1	531.74
61	61.2	194.81
62	61.3	0
63	61.4	43.54
64	61.5	278.42
65	61.6	312.37
66	61.7	141.31
67	61.8	0
68	62.1	0
69	62.2	12.29
70	62.3	25.83
71	62.4	31.56
72	62.5	23.53
73	62.6	8.99
74	62.7	0
75	62.9	0
76	63	2.45
77	63.1	6.98
78	63.2	5.72
79	63.3	0
80	63.5	0
81	63.6	6.87
82	63.7	27.65
83	63.8	50.36
84	63.9	57.61
85	64	36.2
86	64.1	0
87	64.5	0
88	64.6	2.71
89	64.7	1.46
90	64.8	0
91	66.1	0
92	66.2	0.16
93	66.3	0.84
94	66.4	1.01
95	66.5	0
96	66.8	0
97	66.9	0.95
98	67	5.64
99	67.1	6.26
100	67.2	4.95
101	67.3	4.63
102	67.4	5.12
103	67.5	4.55
104	67.6	2.62
105	67.7	0.64
106	67.8	0
107	68.3	0
108	68.4	2.26
109	68.5	6.83
110	68.6	0
111	68.8	0
112	68.9	23.3
113	69	43.38
114	69.1	59.17
115	69.2	63.72
116	69.3	36.26
117	69.4	0
118	70.8	0
119	70.9	59.63
120	71	201.77
121	71.1	250.61
122	71.2	111.88
123	71.3	0
124	72.1	0
125	72.2	2.27
126	72.3	7
127	72.4	0
128	72.5	67.38
129	72.6	206.31
130	72.7	158.3
131	72.8	124.02
132	72.9	234.82
133	73	467.06
134	73.1	591.07
135	73.2	474.18
136	73.3	206.53
137	73.4	0
138	73.9	0
139	74	236.28
140	74.1	203.52
141	74.2	123.49
142	74.3	81.66
143	74.4	104.27
144	74.5	139.3
145	74.6	109.78
146	74.7	55.99
147	74.8	0
148	75.4	0
149	75.5	44.41
150	75.6	37.2
151	75.7	22.91
152	75.8	3.88
153	75.9	0
154	76	0
155	76.1	1.86
156	76.2	15.06
157	76.3	20.72
158	76.4	18.04
159	76.5	16.48
160	76.6	10.34
161	76.7	0
162	76.8	0
163	76.9	17.66
164	77	69.27
165	77.1	98.86
166	77.2	69.34
167	77.3	0
168	77.5	0
169	77.6	49.3
170	77.7	45.98
171	77.8	0
172	78.4	0
173	78.5	38.95
174	78.6	37.85
175	78.7	38.47
176	78.8	60.34
177	78.9	99.26
178	79	114.78
179	79.1	70.68
180	79.2	0
181	79.5	0
182	79.6	6.57
183	79.7	8.04
184	79.8	0
185	80.4	0
186	80.5	72.72
187	80.6	158.41
188	80.7	200.94
189	80.8	142.8
190	80.9	18.61
191	81	0
192	81.1	0
193	81.2	86.59
194	81.3	123.32
195	81.4	72.09
196	81.5	0
197	81.7	0
198	81.8	1.56
199	81.9	13.52
200	82	0
201	82.4	0
202	82.5	2.76
203	82.6	0
204	82.9	0
205	83	23.64
206	83.1	56.65
207	83.2	56.8
208	83.3	17.02
209	83.4	0
210	83.8	0
211	83.9	52.32
212	84	150.08
213	84.1	229.45
214	84.2	227.4
215	84.3	142.16
216	84.4	31.15
217	84.5	0
218	85.1	0
219	85.2	43.53
220	85.3	85.83
221	85.4	90.86
222	85.5	64.11
223	85.6	25.41
224	85.7	2.6
225	85.8	0
226	86	0
227	86.1	8.76
228	86.2	33.9
229	86.3	60.79
230	86.4	66.09
231	86.5	36.7
232	86.6	0
233	86.8	0
234	86.9	40.69
235	87	132.48
236	87.1	163.07
237	87.2	94.7
238	87.3	0
239	88	0
240	88.1	38.27
241	88.2	118.23
242	88.3	235.12
243	88.4	334.51
244	88.5	80.5
245	88.6	0
246	89.2	0
247	89.3	276.14
248	89.4	985.23
249	89.5	729.55
250	89.6	151.18
251	89.7	0
252	90.6	0
253	90.7	3.84
254	90.8	37.96
255	90.9	0
256	91.1	0
257	91.2	88.95
258	91.3	175.51
259	91.4	154.1
260	91.5	43.28
261	91.6	0
262	92.1	0
263	92.2	1.34
264	92.3	9.63
265	92.4	16.13
266	92.5	22.68
267	92.6	29.41
268	92.7	32.68
269	92.8	40
270	92.9	42.35
271	93	28.57
272	93.1	3.12
273	93.2	0
274	93.3	8.32
275	93.4	32.77
276	93.5	38.06
277	93.6	39.28
278	93.7	40.14
279	93.8	33.49
280	93.9	18.35
281	94	5.04
282	94.1	1.8
283	94.2	0
284	94.3	0
285	94.4	0.13
286	94.5	0
287	94.6	0
288	94.7	5.79
289	94.8	36.75
290	94.9	68.19
291	95	66.41
292	95.1	26.27
293	95.2	0
294	96.3	0
295	96.4	4.83
296	96.5	2.23
297	96.6	4.12
298	96.7	0
299	96.8	0
300	96.9	36.43
301	97	135.42
302	97.1	211.7
303	97.2	188.91
304	97.3	76.01
305	97.4	0
306	98	0
307	98.1	45.16
308	98.2	104.32
309	98.3	45.81
310	98.4	41.06
311	98.5	170.22
312	98.6	393.88
313	98.7	608.68
314	98.8	756.68
315	98.9	756.84
316	99	507.2
317	99.1	96.97
318	99.2	0
319	99.3	0
320	99.4	96.66
321	99.5	191.96
322	99.6	89.62
323	99.7	0
324	101	0
325	101.1	196.58
326	101.2	420.77
327	101.3	420.89
328	101.4	398.63
329	101.5	418.94
330	101.6	368.98
331	101.7	169.88
332	101.8	0
333	102.2	0
334	102.3	188.87
335	102.4	278.43
336	102.5	67.22
337	102.6	0
338	102.8	0
339	102.9	189.83
340	103	409.95
341	103.1	532.41
342	103.2	411.63
343	103.3	76.05
344	103.4	0
345	103.6	0
346	103.7	17.75
347	103.8	51.29
348	103.9	1.06
349	104	0
350	104.2	0
351	104.3	0.21
352	104.4	46.78
353	104.5	78.42
354	104.6	84.58
355	104.7	34.46
356	104.8	0
357	105.1	0
358	105.2	22.78
359	105.3	18.92
360	105.4	2.37
361	105.5	7.77
362	105.6	30.79
363	105.7	25.13
364	105.8	0
365	106.7	0
366	106.8	63.82
367	106.9	116.55
368	107	82.63
369	107.1	0
370	107.4	0
371	107.5	44.15
372	107.6	48.01
373	107.7	14.72
374	107.8	0
375	108.5	0
376	108.6	11.01
377	108.7	76.12
378	108.8	120.47
379	108.9	114.06
380	109	60.8
381	109.1	0
382	109.3	0
383	109.4	31.59
384	109.5	48.97
385	109.6	29.04
386	109.7	0
387	110.1	0
388	110.2	6.66
389	110.3	14.59
390	110.4	0
391	110.6	0
392	110.7	47.89
393	110.8	126.23
394	110.9	174.25
395	111	180.55
396	111.1	184.31
397	111.2	215.37
398	111.3	238.06
399	111.4	192.28
400	111.5	91.79
401	111.6	14.62
402	111.7	8.39
403	111.8	29.85
404	111.9	18.6
405	112	0
406	112.5	0
407	112.6	29.34
408	112.7	173.85
409	112.8	318.85
410	112.9	335.75
411	113	242.2
412	113.1	185.65
413	113.2	230.35
414	113.3	279.61
415	113.4	225.59
416	113.5	100.2
417	113.6	0
418	114.9	0
419	115	8.61
420	115.1	114.76
421	115.2	177.8
422	115.3	83.94
423	115.4	0
424	116	0
425	116.1	3.41
426	116.2	0
427	116.7	0
428	116.8	97.43
429	116.9	152.45
430	117	110.74
431	117.1	31.04
432	117.2	0
433	117.3	3.13
434	117.4	29.89
435	117.5	47.87
436	117.6	55.24
437	117.7	39.65
438	117.8	23.78
439	117.9	10.63
440	118	8.83
441	118.1	9.92
442	118.2	0
443	119.6	0
444	119.7	24.48
445	119.8	30.77
446	119.9	0
447	121.7	0
448	121.8	34.77
449	121.9	0
450	122.1	0
451	122.2	104.5
452	122.3	199.37
453	122.4	213.26
454	122.5	158.81
455	122.6	79.53
456	122.7	25.73
457	122.8	7.34
458	122.9	19.87
459	123	71.21
460	123.1	142.49
461	123.2	172.91
462	123.3	118.82
463	123.4	23.58
464	123.5	0
465	123.6	0
466	123.7	45.3
467	123.8	64.57
468	123.9	35.65
469	124	0
470	124.2	0
471	124.3	8.42
472	124.4	29.02
473	124.5	44.65
474	124.6	44.49
475	124.7	39.33
476	124.8	54.6
477	124.9	84.01
478	125	97.92
479	125.1	88.29
480	125.2	59.71
481	125.3	16.55
482	125.4	0
483	125.6	0
484	125.7	18.52
485	125.8	29.98
486	125.9	32.05
487	126	33.38
488	126.1	28.16
489	126.2	11.52
490	126.3	0
491	126.9	0
492	127	15.82
493	127.1	73.52
494	127.2	47.63
495	127.3	0
496	127.5	0
497	127.6	6.14
498	127.7	0
499	128	0
500	128.1	4.9
501	128.2	37.97
502	128.3	17.87
503	128.4	0
504	128.7	0
505	128.8	181.75
506	128.9	272.2
507	129	203.13
508	129.1	14.69
509	129.2	0
510	129.4	0
511	129.5	115.08
512	129.6	76.9
513	129.7	0
514	129.9	0
515	130	40.42
516	130.1	121.29
517	130.2	131.8
518	130.3	142.17
519	130.4	180.81
520	130.5	188.16
521	130.6	91.37
522	130.7	0
523	131.6	0
524	131.7	13.89
525	131.8	33.37
526	131.9	47.16
527	132	49.39
528	132.1	30.58
529	132.2	0
530	132.5	0
531	132.6	2.94
532	132.7	34.99
533	132.8	16.24
534	132.9	0
535	133.3	0
536	133.4	35.68
537	133.5	44.84
538	133.6	0
539	134	0
540	134.1	49.42
541	134.2	58.66
542	134.3	16.95
543	134.4	0
544	135.6	0
545	135.7	64.18
546	135.8	123.86
547	135.9	110.21
548	136	32.05
549	136.1	0
550	136.7	0
551	136.8	79.19
552	136.9	547.85
553	137	769.3
554	137.1	540.8
555	137.2	103.45
556	137.3	0
557	137.5	0
558	137.6	28.37
559	137.7	28.57
560	137.8	0
561	138	0
562	138.1	41.17
563	138.2	126.24
564	138.3	208.74
565	138.4	238.49
566	138.5	221.77
567	138.6	172.79
568	138.7	79.67
569	138.8	0
570	139.8	0
571	139.9	53.41
572	140	133.99
573	140.1	154
574	140.2	114.45
575	140.3	55.26
576	140.4	9.64
577	140.5	13.75
578	140.6	61.68
579	140.7	107.65
580	140.8	107.49
581	140.9	75.16
582	141	61.67
583	141.1	78.57
584	141.2	87.96
585	141.3	75.19
586	141.4	29.33
587	141.5	0
588	141.8	0
589	141.9	15.75
590	142	16.9
591	142.1	24.63
592	142.2	46.54
593	142.3	69.49
594	142.4	70.78
595	142.5	36.88
596	142.6	0
597	142.7	15.64
598	142.8	77.63
599	142.9	117.23
600	143	112.63
601	143.1	105.65
602	143.2	110.86
603	143.3	83.19
604	143.4	10.16
605	143.5	0
606	143.8	0
607	143.9	17.96
608	144	59.11
609	144.1	85.77
610	144.2	81.75
611	144.3	88.52
612	144.4	51.14
613	144.5	0
614	145.2	0
615	145.3	40.86
616	145.4	67.07
617	145.5	0
618	146.2	0
619	146.3	21.87
620	146.4	43.53
621	146.5	21.38
622	146.6	0
623	147	0
624	147.1	1.46
625	147.2	21.51
626	147.3	13.37
627	147.4	0
628	147.5	0
629	147.6	12.91
630	147.7	21.84
631	147.8	6.8
632	147.9	0
633	148.2	0
634	148.3	21.27
635	148.4	70.83
636	148.5	102.31
637	148.6	136.55
638	148.7	153.07
639	148.8	161.08
640	148.9	156.74
641	149	122.37
642	149.1	54.1
643	149.2	0
644	149.3	0
645	149.4	18.33
646	149.5	37.45
647	149.6	19.17
648	149.7	5.02
649	149.8	4.55
650	149.9	6.79
651	150	0
652	150.6	0
653	150.7	2.84
654	150.8	4.15
655	150.9	14.87
656	151	29.76
657	151.1	32.14
658	151.2	24.05
659	151.3	15.95
660	151.4	7.6
661	151.5	3.03
662	151.6	21.52
663	151.7	56.09
664	151.8	71.26
665	151.9	57.86
666	152	25.42
667	152.1	2.51
668	152.2	23.87
669	152.3	64.18
670	152.4	91.69
671	152.5	83.59
672	152.6	33.99
673	152.7	0
674	152.8	0
675	152.9	12.4
676	153	95.31
677	153.1	209.02
678	153.2	329.18
679	153.3	349.73
680	153.4	184.91
681	153.5	0
682	153.7	0
683	153.8	33.71
684	153.9	93.68
685	154	92.3
686	154.1	56.31
687	154.2	6.38
688	154.3	0
689	154.5	0
690	154.6	17.12
691	154.7	62.18
692	154.8	79.93
693	154.9	49.21
694	155	0
695	155.5	0
696	155.6	3.13
697	155.7	16.05
698	155.8	24.66
699	155.9	23.98
700	156	9.66
701	156.1	0
702	157	0
703	157.1	104.92
704	157.2	174.92
705	157.3	151.84
706	157.4	82.42
707	157.5	15.23
708	157.6	0
709	158.5	0
710	158.6	135.08
711	158.7	256.88
712	158.8	265.41
713	158.9	166.97
714	159	69.55
715	159.1	54.31
716	159.2	83.99
717	159.3	80.87
718	159.4	37.55
719	159.5	0.48
720	159.6	0
721	161.5	0
722	161.6	38.77
723	161.7	89.46
724	161.8	57.17
725	161.9	0
726	162.2	0
727	162.3	1
728	162.4	5.47
729	162.5	24.93
730	162.6	56.18
731	162.7	59.9
732	162.8	14.87
733	162.9	0
734	164.2	0
735	164.3	6.92
736	164.4	12.95
737	164.5	7.86
738	164.6	0
739	165.5	0
740	165.6	2.98
741	165.7	5.62
742	165.8	4.42
743	165.9	4.48
744	166	6.31
745	166.1	8.16
746	166.2	8.67
747	166.3	4.61
748	166.4	0
749	166.8	0
750	166.9	17.75
751	167	31.25
752	167.1	38.71
753	167.2	40.56
754	167.3	30.76
755	167.4	9.62
756	167.5	0
757	168.5	0
758	168.6	11.29
759	168.7	16.25
760	168.8	19.23
761	168.9	34.35
762	169	49.09
763	169.1	38.1
764	169.2	0.42
765	169.3	0
766	169.5	0
767	169.6	26.16
768	169.7	48.24
769	169.8	49.03
770	169.9	29.59
771	170	0
772	170.3	0
773	170.4	42.21
774	170.5	102.22
775	170.6	108.99
776	170.7	40.99
777	170.8	0
778	171	0
779	171.1	108.65
780	171.2	140.91
781	171.3	82.58
782	171.4	33.11
783	171.5	12.36
784	171.6	3.54
785	171.7	0
786	172.2	0
787	172.3	8.65
788	172.4	18.03
789	172.5	10.66
790	172.6	12.94
791	172.7	56.52
792	172.8	97.16
793	172.9	65.89
794	173	0
795	173.5	0
796	173.6	7.87
797	173.7	1.46
798	173.8	0
799	174.2	0
800	174.3	4.07
801	174.4	6.62
802	174.5	0
803	174.6	0
804	174.7	9.21
805	174.8	68.02
806	174.9	110.55
807	175	77.36
808	175.1	0
809	175.7	0
810	175.8	0.38
811	175.9	0
812	176.3	0
813	176.4	4.89
814	176.5	28.93
815	176.6	10.96
816	176.7	0
817	177.6	0
818	177.7	1.36
819	177.8	20.41
820	177.9	11.14
821	178	0
822	178.2	0
823	178.3	29.66
824	178.4	36.2
825	178.5	23.05
826	178.6	2.9
827	178.7	0
828	178.8	0
829	178.9	7.29
830	179	9.61
831	179.1	0
832	179.5	0
833	179.6	12.4
834	179.7	26.34
835	179.8	17.73
836	179.9	1.93
837	180	0
838	180.1	1.38
839	180.2	18.8
840	180.3	29.94
841	180.4	26.02
842	180.5	9.78
843	180.6	0
844	181.2	0
845	181.3	8.45
846	181.4	7.75
847	181.5	0
848	182.6	0
849	182.7	10.46
850	182.8	15.63
851	182.9	8.93
852	183	29.44
853	183.1	80.65
854	183.2	103.85
855	183.3	71.37
856	183.4	19.88
857	183.5	0
858	183.7	0
859	183.8	7.1
860	183.9	13.26
861	184	11.2
862	184.1	0.39
863	184.2	0
864	185.5	0
865	185.6	9.32
866	185.7	7.85
867	185.8	0
868	186.2	0
869	186.3	13.48
870	186.4	29.15
871	186.5	11.45
872	186.6	0
873	187.5	0
874	187.6	1.67
875	187.7	7.69
876	187.8	6.82
877	187.9	5.42
878	188	3.71
879	188.1	0
880	189.3	0
881	189.4	4.18
882	189.5	12.85
883	189.6	5.91
884	189.7	7.3
885	189.8	14.22
886	189.9	15.99
887	190	13.27
888	190.1	14.93
889	190.2	20.96
890	190.3	20.64
891	190.4	20.03
892	190.5	21.77
893	190.6	3.31
894	190.7	0
895	191.3	0
896	191.4	28.25
897	191.5	32.93
898	191.6	15.16
899	191.7	10.63
900	191.8	26.02
901	191.9	39.18
902	192	40.41
903	192.1	35.99
904	192.2	36.2
905	192.3	36.47
906	192.4	15.21
907	192.5	0
908	192.8	0
909	192.9	3.24
910	193	30.07
911	193.1	31
912	193.2	29.07
913	193.3	30.93
914	193.4	13.71
915	193.5	0
916	193.6	0
917	193.7	15.99
918	193.8	46.06
919	193.9	44.32
920	194	23.11
921	194.1	6.61
922	194.2	0
923	194.5	0
924	194.6	36.27
925	194.7	139.33
926	194.8	257.17
927	194.9	337.34
928	195	356.01
929	195.1	333.91
930	195.2	288.05
931	195.3	215.78
932	195.4	121.65
933	195.5	59.42
934	195.6	38.27
935	195.7	55.2
936	195.8	77.77
937	195.9	81.64
938	196	63.2
939	196.1	36.78
940	196.2	15.99
941	196.3	0
942	197.3	0
943	197.4	11.86
944	197.5	10.12
945	197.6	0
946	198.2	0
947	198.3	7.39
948	198.4	0
949	199.2	0
950	199.3	20.88
951	199.4	44.29
952	199.5	58.71
953	199.6	52.08
954	199.7	20.28
955	199.8	0
956	200	0
957	200.1	9.64
958	200.2	3.1
959	200.3	0
960	202.3	0
961	202.4	20.47
962	202.5	39.36
963	202.6	34.49
964	202.7	13.2
965	202.8	0
966	202.9	0
967	203	6.16
968	203.1	17.67
969	203.2	19.35
970	203.3	7.51
971	203.4	0
972	203.7	0
973	203.8	7.43
974	203.9	10.13
975	204	2.78
976	204.1	0
977	204.2	0
978	204.3	15.12
979	204.4	35.89
980	204.5	49.71
981	204.6	40.74
982	204.7	0
983	205.5	0
984	205.6	29.16
985	205.7	17.75
986	205.8	0
987	206.2	0
988	206.3	6.68
989	206.4	34.9
990	206.5	35.64
991	206.6	10.41
992	206.7	0
993	207.5	0
994	207.6	6.02
995	207.7	33.37
996	207.8	3.81
997	207.9	0
998	208.4	0
999	208.5	2.92
1000	208.6	0
1001	209.3	0
1002	209.4	2.11
1003	209.5	7.8
1004	209.6	16.51
1005	209.7	18.45
1006	209.8	16.24
1007	209.9	11.59
1008	210	8
1009	210.1	3.38
1010	210.2	0
1011	210.5	0
1012	210.6	11.64
1013	210.7	26.08
1014	210.8	24.51
1015	210.9	12.56
1016	211	3.72
1017	211.1	6.74
1018	211.2	12.93
1019	211.3	15.86
1020	211.4	12.6
1021	211.5	7.63
1022	211.6	5.4
1023	211.7	8.82
1024	211.8	10.02
1025	211.9	5.05
1026	212	0
1027	212.7	0
1028	212.8	19.17
1029	212.9	61.55
1030	213	90.41
1031	213.1	98.8
1032	213.2	86.46
1033	213.3	47.15
1034	213.4	0
1035	213.9	0
1036	214	29.29
1037	214.1	76.32
1038	214.2	74.55
1039	214.3	36.98
1040	214.4	5.9
1041	214.5	0
1042	215.3	0
1043	215.4	12.07
1044	215.5	18.41
1045	215.6	9.86
1046	215.7	0
1047	216.7	0
1048	216.8	7.62
1049	216.9	14.18
1050	217	11.02
1051	217.1	10.09
1052	217.2	20.43
1053	217.3	26.69
1054	217.4	7.01
1055	217.5	0
1056	217.8	0
1057	217.9	7.57
1058	218	17.88
1059	218.1	0
1060	219.3	0
1061	219.4	0.1
1062	219.5	11.23
1063	219.6	20.45
1064	219.7	19.7
1065	219.8	5.98
1066	219.9	0
1067	220.1	0
1068	220.2	11.27
1069	220.3	0
1070	221.5	0
1071	221.6	11.9
1072	221.7	23.13
1073	221.8	21.75
1074	221.9	0
1075	222.1	0
1076	222.2	53.21
1077	222.3	197.27
1078	222.4	253.12
1079	222.5	91.68
1080	222.6	0
1081	223.1	0
1082	223.2	62.93
1083	223.3	47.73
1084	223.4	0
1085	223.5	0
1086	223.6	94.9
1087	223.7	220.55
1088	223.8	191.15
1089	223.9	91
1090	224	78.99
1091	224.1	165.64
1092	224.2	198.16
1093	224.3	93.13
1094	224.4	0
1095	224.5	0
1096	224.6	108.67
1097	224.7	203.89
1098	224.8	222.5
1099	224.9	192.06
1100	225	132.98
1101	225.1	51.81
1102	225.2	0
1103	226	0
1104	226.1	3.6
1105	226.2	5.38
1106	226.3	0
1107	226.4	0
1108	226.5	9.88
1109	226.6	27.53
1110	226.7	40.09
1111	226.8	36.16
1112	226.9	19.12
1113	227	15.89
1114	227.1	29.61
1115	227.2	38.13
1116	227.3	20.78
1117	227.4	0
1118	228.8	0
1119	228.9	8.52
1120	229	25.48
1121	229.1	17.69
1122	229.2	0
1123	229.4	0
1124	229.5	0.81
1125	229.6	11.32
1126	229.7	16.57
1127	229.8	23.52
1128	229.9	33.34
1129	230	39.08
1130	230.1	35.74
1131	230.2	21.48
1132	230.3	2.11
1133	230.4	0
1134	230.9	0
1135	231	0.07
1136	231.1	8.47
1137	231.2	6.21
1138	231.3	0
1139	231.8	0
1140	231.9	0.66
1141	232	14.19
1142	232.1	21.82
1143	232.2	12.03
1144	232.3	0
1145	232.4	0
1146	232.5	16.49
1147	232.6	42.09
1148	232.7	43.6
1149	232.8	9.65
1150	232.9	0
1151	233.3	0
1152	233.4	17.68
1153	233.5	26.02
1154	233.6	23.63
1155	233.7	13.87
1156	233.8	5.86
1157	233.9	3.6
1158	234	3.33
1159	234.1	2.34
1160	234.2	0
1161	234.7	0
1162	234.8	4.12
1163	234.9	29.36
1164	235	37.43
1165	235.1	55.74
1166	235.2	89.59
1167	235.3	108.37
1168	235.4	78.04
1169	235.5	21.19
1170	235.6	0
1171	235.9	0
1172	236	6.51
1173	236.1	6.56
1174	236.2	0.16
1175	236.3	0
1176	236.4	0
1177	236.5	7.69
1178	236.6	0
1179	237.8	0
1180	237.9	3.74
1181	238	17.36
1182	238.1	17.86
1183	238.2	3.87
1184	238.3	0
1185	238.4	0
1186	238.5	10.99
1187	238.6	21.71
1188	238.7	19.26
1189	238.8	16.13
1190	238.9	30.8
1191	239	53.44
1192	239.1	59.12
1193	239.2	41.74
1194	239.3	16.05
1195	239.4	0.56
1196	239.5	0
1197	240	0
1198	240.1	6.77
1199	240.2	12.14
1200	240.3	5.26
1201	240.4	0
1202	240.8	0
1203	240.9	16.67
1204	241	50.07
1205	241.1	56.96
1206	241.2	33.47
1207	241.3	0
1208	241.7	0
1209	241.8	9.37
1210	241.9	41.42
1211	242	72.07
1212	242.1	71.91
1213	242.2	42.13
1214	242.3	14.92
1215	242.4	14.49
1216	242.5	33.97
1217	242.6	48.52
1218	242.7	46.92
1219	242.8	29.99
1220	242.9	4.74
1221	243	0
1222	243.4	0
1223	243.5	1.41
1224	243.6	0.04
1225	243.7	0
1226	244.1	0
1227	244.2	3.57
1228	244.3	10.05
1229	244.4	18.06
1230	244.5	22.55
1231	244.6	18.29
1232	244.7	8.9
1233	244.8	1.76
1234	244.9	0
1235	245.5	0
1236	245.6	0.76
1237	245.7	3.47
1238	245.8	3.43
1239	245.9	0.18
1240	246	0
1241	246.1	0
1242	246.2	5.08
1243	246.3	8.74
1244	246.4	13.36
1245	246.5	23.65
1246	246.6	36.81
1247	246.7	43.38
1248	246.8	38.5
1249	246.9	26.25
1250	247	13.78
1251	247.1	1.86
1252	247.2	0
1253	249.2	0
1254	249.3	3.15
1255	249.4	6
1256	249.5	4.02
1257	249.6	6.02
1258	249.7	12.14
1259	249.8	17.21
1260	249.9	19.04
1261	250	19.26
1262	250.1	16.75
1263	250.2	7.48
1264	250.3	0
1265	250.5	0
1266	250.6	5.16
1267	250.7	23.33
1268	250.8	39.77
1269	250.9	56.16
1270	251	64.19
1271	251.1	53.12
1272	251.2	26.22
1273	251.3	0
1274	252.4	0
1275	252.5	11.71
1276	252.6	37.99
1277	252.7	38.13
1278	252.8	25.97
1279	252.9	30.1
1280	253	43.86
1281	253.1	42.2
1282	253.2	21.51
1283	253.3	3.87
1284	253.4	4.9
1285	253.5	7.75
1286	253.6	5.94
1287	253.7	2.17
1288	253.8	0
1289	254.1	0
1290	254.2	0.83
1291	254.3	2.78
1292	254.4	4.25
1293	254.5	3.4
1294	254.6	0
1295	255	0
1296	255.1	0.55
1297	255.2	1.08
1298	255.3	0.03
1299	255.4	0
1300	256.4	0
1301	256.5	3.61
1302	256.6	0
1303	257.4	0
1304	257.5	10.81
1305	257.6	34.45
1306	257.7	65.39
1307	257.8	102.37
1308	257.9	142.39
1309	258	185.92
1310	258.1	223.94
1311	258.2	245.15
1312	258.3	233.36
1313	258.4	177.66
1314	258.5	93.57
1315	258.6	28.25
1316	258.7	9.19
1317	258.8	17.85
1318	258.9	51.2
1319	259	81.43
1320	259.1	84.19
1321	259.2	53
1322	259.3	12.47
1323	259.4	0
1324	259.5	0
1325	259.6	0.45
1326	259.7	7.87
1327	259.8	13.6
1328	259.9	18.18
1329	260	25.45
1330	260.1	35.68
1331	260.2	39.19
1332	260.3	27.65
1333	260.4	5.13
1334	260.5	0
1335	260.9	0
1336	261	6.1
1337	261.1	25.45
1338	261.2	30.53
1339	261.3	17.65
1340	261.4	0
1341	262.1	0
1342	262.2	1.91
1343	262.3	13.69
1344	262.4	19.59
1345	262.5	27.09
1346	262.6	36.08
1347	262.7	35.83
1348	262.8	20.75
1349	262.9	4.6
1350	263	6.03
1351	263.1	14.83
1352	263.2	17.01
1353	263.3	12.17
1354	263.4	5.73
1355	263.5	3.88
1356	263.6	3.12
1357	263.7	0
1358	264.4	0
1359	264.5	10.72
1360	264.6	14.81
1361	264.7	10.41
1362	264.8	0
1363	265.4	0
1364	265.5	1
1365	265.6	5.74
1366	265.7	9.56
1367	265.8	7.57
1368	265.9	0.66
1369	266	0
1370	266.1	0
1371	266.2	2.94
1372	266.3	1.72
1373	266.4	0
1374	266.5	6.59
1375	266.6	19.85
1376	266.7	25.39
1377	266.8	15.54
1378	266.9	0
1379	267	0
1380	267.1	5.86
1381	267.2	18.07
1382	267.3	18.05
1383	267.4	7.8
1384	267.5	0.84
1385	267.6	5.01
1386	267.7	14.52
1387	267.8	17.24
1388	267.9	7.16
1389	268	0
1390	268.7	0
1391	268.8	1.11
1392	268.9	0.61
1393	269	0
1394	269.1	0
1395	269.2	5.86
1396	269.3	17.9
1397	269.4	25.93
1398	269.5	24.33
1399	269.6	18.83
1400	269.7	17.9
1401	269.8	19.56
1402	269.9	14.78
1403	270	3.02
1404	270.1	0
1405	270.4	0
1406	270.5	1.25
1407	270.6	3.12
1408	270.7	6.19
1409	270.8	6.48
1410	270.9	0
1411	274.2	0
1412	274.3	14.88
1413	274.4	7.21
1414	274.5	0
1415	274.8	0
1416	274.9	19.92
1417	275	38.8
1418	275.1	26.58
1419	275.2	0
1420	276.1	0
1421	276.2	5.99
1422	276.3	6.83
1423	276.4	3.19
1424	276.5	0
1425	276.9	0
1426	277	24.5
1427	277.1	36.2
1428	277.2	26.38
1429	277.3	10.55
1430	277.4	1.62
1431	277.5	0
1432	277.6	3.14
1433	277.7	10.4
1434	277.8	19.54
1435	277.9	24.1
1436	278	19.98
1437	278.1	10.44
1438	278.2	1.39
1439	278.3	0
1440	278.7	0
1441	278.8	5.93
1442	278.9	7.05
1443	279	0
1444	279.3	0
1445	279.4	4.54
1446	279.5	0
1447	280.3	0
1448	280.4	100.46
1449	280.5	188.3
1450	280.6	182.52
1451	280.7	136.05
1452	280.8	73.74
1453	280.9	0
1454	282.1	0
1455	282.2	32.05
1456	282.3	85.3
1457	282.4	36.9
1458	282.5	0
1459	283.5	0
1460	283.6	17.49
1461	283.7	14.67
1462	283.8	0
1463	284.4	0
1464	284.5	14.64
1465	284.6	13.52
1466	284.7	0
1467	284.9	0
1468	285	7.5
1469	285.1	21.34
1470	285.2	16.17
1471	285.3	6.78
1472	285.4	21.6
1473	285.5	120.88
1474	285.6	394.12
1475	285.7	780.41
1476	285.8	1164.86
1477	285.9	1488.04
1478	286	1744.02
1479	286.1	1921.24
1480	286.2	1970.79
1481	286.3	1826.68
1482	286.4	1446.73
1483	286.5	909.4
1484	286.6	431.39
1485	286.7	213.76
1486	286.8	208.35
1487	286.9	311.7
1488	287	382.14
1489	287.1	372.7
1490	287.2	304.81
1491	287.3	236.72
1492	287.4	183.35
1493	287.5	134.93
1494	287.6	79.13
1495	287.7	26.48
1496	287.8	1.35
1497	287.9	0.47
1498	288	7.75
1499	288.1	14.34
1500	288.2	15.26
1501	288.3	12.09
1502	288.4	7.62
1503	288.5	3.64
1504	288.6	0.84
1505	288.7	0
1506	289.1	0
1507	289.2	2.27
1508	289.3	3.25
1509	289.4	0
1510	289.7	0
1511	289.8	6.92
1512	289.9	21.31
1513	290	18.98
1514	290.1	3.33
1515	290.2	0
1516	290.3	0.49
1517	290.4	19.47
1518	290.5	30.55
1519	290.6	26.09
1520	290.7	14.33
1521	290.8	6.34
1522	290.9	2.87
1523	291	0
1524	295.4	0
1525	295.5	2.23
1526	295.6	6.41
1527	295.7	8.49
1528	295.8	11.73
1529	295.9	10.63
1530	296	1.6
1531	296.1	0
1532	296.2	0
1533	296.3	18.59
1534	296.4	136.89
1535	296.5	248.61
1536	296.6	343.65
1537	296.7	446.57
1538	296.8	521.05
1539	296.9	482.06
1540	297	326.16
1541	297.1	147.63
1542	297.2	10.93
1543	297.3	0
1544	297.6	0
1545	297.7	141.84
1546	297.8	316.29
1547	297.9	328.02
1548	298	188.85
1549	298.1	48.37
1550	298.2	0
1551	298.6	0
1552	298.7	109.37
1553	298.8	289.16
1554	298.9	357.2
1555	299	337.09
1556	299.1	292.12
1557	299.2	230.93
1558	299.3	129.76
1559	299.4	13.38
1560	299.5	0
1561	299.6	21.5
1562	299.7	45.84
1563	299.8	81.37
1564	299.9	120.01
1565	300	141.87
1566	300.1	126.34
1567	300.2	87.23
1568	300.3	61.04
1569	300.4	47.35
1570	300.5	21.84
1571	300.6	0
1572	301	0
1573	301.1	14.44
1574	301.2	0
1575	301.3	0
1576	301.4	129.21
1577	301.5	805.08
1578	301.6	2981.76
1579	301.7	7099.34
1580	301.8	12709.5
1581	301.9	18531.9
1582	302	23155.2
1583	302.1	25828.3
1584	302.2	26615.3
1585	302.3	25640.8
1586	302.4	22414.4
1587	302.5	16608.6
1588	302.6	9587.24
1589	302.7	4149.91
1590	302.8	2131.39
1591	302.9	2806.61
1592	303	4139.32
1593	303.1	4840.84
1594	303.2	4933.29
1595	303.3	4708.67
1596	303.4	4033.79
1597	303.5	2765.22
1598	303.6	1306.2
1599	303.7	350.74
1600	303.8	162.72
1601	303.9	298.47
1602	304	444.16
1603	304.1	471.25
1604	304.2	461.5
1605	304.3	450.3
1606	304.4	387.74
1607	304.5	247.37
1608	304.6	91.35
1609	304.7	6.17
1610	304.8	0.14
1611	304.9	23.53
1612	305	36.49
1613	305.1	26.08
1614	305.2	7.74
1615	305.3	0
1616	305.6	0
1617	305.7	0.45
1618	305.8	1.38
1619	305.9	1.75
1620	306	0.48
1621	306.1	0
1622	306.9	0
1623	307	2.85
1624	307.1	3.45
1625	307.2	1.31
1626	307.3	0
1627	307.7	0
1628	307.8	4.41
1629	307.9	5.36
1630	308	5.16
1631	308.1	5.65
1632	308.2	5.35
1633	308.3	2.87
1634	308.4	1.81
1635	308.5	7.99
1636	308.6	20.2
1637	308.7	28.24
1638	308.8	24.2
1639	308.9	12.52
1640	309	4.27
1641	309.1	3.69
1642	309.2	5.63
1643	309.3	4.8
1644	309.4	1.96
1645	309.5	0.24
1646	309.6	0.16
1647	309.7	0.43
1648	309.8	0.75
1649	309.9	1.85
1650	310	3.94
1651	310.1	6.68
1652	310.2	8.95
1653	310.3	7.04
1654	310.4	0
1655	312.3	0
1656	312.4	4.05
1657	312.5	2.68
1658	312.6	0
1659	312.7	0
1660	312.8	0.58
1661	312.9	6.87
1662	313	9.58
1663	313.1	4.76
1664	313.2	0
1665	313.4	0
1666	313.5	7.14
1667	313.6	15.88
1668	313.7	9.94
1669	313.8	0
1670	313.9	0
1671	314	13.41
1672	314.1	28.43
1673	314.2	25.51
1674	314.3	11.88
1675	314.4	4.51
1676	314.5	1.85
1677	314.6	0
1678	315.5	0
1679	315.6	1.87
1680	315.7	6.63
1681	315.8	11.09
1682	315.9	13.88
1683	316	15.14
1684	316.1	21.18
1685	316.2	28.41
1686	316.3	28.17
1687	316.4	17.62
1688	316.5	4.51
1689	316.6	0
1690	316.7	0
1691	316.8	0.01
1692	316.9	2.19
1693	317	5.16
1694	317.1	15.47
1695	317.2	32.71
1696	317.3	45.85
1697	317.4	56
1698	317.5	65.37
1699	317.6	98.22
1700	317.7	184.47
1701	317.8	306.93
1702	317.9	445.09
1703	318	517.1
1704	318.1	468.15
1705	318.2	355.99
1706	318.3	295.61
1707	318.4	308.71
1708	318.5	292.46
1709	318.6	188.85
1710	318.7	73.62
1711	318.8	31.43
1712	318.9	62.14
1713	319	84.39
1714	319.1	68.14
1715	319.2	35.25
1716	319.3	18.45
1717	319.4	15.81
1718	319.5	8.93
1719	319.6	0
1720	319.9	0
1721	320	10.78
1722	320.1	26.99
1723	320.2	34.36
1724	320.3	25.31
1725	320.4	9.86
1726	320.5	3.19
1727	320.6	5.7
1728	320.7	10.69
1729	320.8	16.25
1730	320.9	20.06
1731	321	20.21
1732	321.1	15.2
1733	321.2	7.44
1734	321.3	1.71
1735	321.4	0
1736	321.9	0
1737	322	0.39
1738	322.1	1.04
1739	322.2	1.86
1740	322.3	6.71
1741	322.4	13.62
1742	322.5	31.07
1743	322.6	47.61
1744	322.7	48.47
1745	322.8	30.86
1746	322.9	9.52
1747	323	2.29
1748	323.1	2.45
1749	323.2	3.23
1750	323.3	5.18
1751	323.4	5.13
1752	323.5	2.9
1753	323.6	0
1754	324	0
1755	324.1	3.26
1756	324.2	24.36
1757	324.3	41.93
1758	324.4	40.94
1759	324.5	22.84
1760	324.6	3.41
1761	324.7	0
1762	325.8	0
1763	325.9	0.76
1764	326	0.97
1765	326.1	0
1766	327.3	0
1767	327.4	2.67
1768	327.5	7.59
1769	327.6	4.04
1770	327.7	0
1771	327.9	0
1772	328	6.6
1773	328.1	19.55
1774	328.2	35.43
1775	328.3	40.91
1776	328.4	31.48
1777	328.5	9.39
1778	328.6	0
1779	329	0
1780	329.1	13.93
1781	329.2	6.43
1782	329.3	0
1783	330.5	0
1784	330.6	14.78
1785	330.7	3.39
1786	330.8	0
1787	331.5	0
1788	331.6	1.69
1789	331.7	6.55
1790	331.8	8.45
1791	331.9	8.81
1792	332	5.73
1793	332.1	0
1794	333.3	0
1795	333.4	1.28
1796	333.5	0
1797	334.2	0
1798	334.3	3.31
1799	334.4	1.18
1800	334.5	0
1801	335	0
1802	335.1	4.65
1803	335.2	7.16
1804	335.3	1.71
1805	335.4	0
1806	336.9	0
1807	337	2.87
1808	337.1	2.99
1809	337.2	0
1810	338.5	0
1811	338.6	4
1812	338.7	0
1813	339.9	0
1814	340	0.74
1815	340.1	6.95
1816	340.2	6.17
1817	340.3	2.37
1818	340.4	0
1819	341.2	0
1820	341.3	1.95
1821	341.4	13.04
1822	341.5	13.7
1823	341.6	0
1824	342.3	0
1825	342.4	0.49
1826	342.5	2.5
1827	342.6	5.42
1828	342.7	4.27
1829	342.8	0
1830	343.8	0
1831	343.9	4.11
1832	344	17.07
1833	344.1	29.98
1834	344.2	33.03
1835	344.3	24.74
1836	344.4	14.39
1837	344.5	10.71
1838	344.6	10.58
1839	344.7	8.23
1840	344.8	3.11
1841	344.9	0
1842	345	0.52
1843	345.1	8.67
1844	345.2	11.53
1845	345.3	16.23
1846	345.4	130.46
1847	345.5	526.4
1848	345.6	1515.82
1849	345.7	3213.6
1850	345.8	5612.8
1851	345.9	8560.33
1852	346	11570.6
1853	346.1	13909.6
1854	346.2	15076.4
1855	346.3	14989
1856	346.4	13524.5
1857	346.5	10450.7
1858	346.6	6272.94
1859	346.7	2571.76
1860	346.8	791.89
1861	346.9	894.48
1862	347	1874.28
1863	347.1	2787.48
1864	347.2	3203.41
1865	347.3	3150.52
1866	347.4	2739.15
1867	347.5	2014.47
1868	347.6	1130.21
1869	347.7	404.83
1870	347.8	116.24
1871	347.9	146.2
1872	348	254.04
1873	348.1	361.86
1874	348.2	406.74
1875	348.3	385.36
1876	348.4	309.46
1877	348.5	198.38
1878	348.6	71.72
1879	348.7	0
1880	349.9	0
1881	350	2.72
1882	350.1	1.04
1883	350.2	0
1884	350.6	0
1885	350.7	23.31
1886	350.8	32.47
1887	350.9	19.79
1888	351	3.95
1889	351.1	0
1890	351.4	0
1891	351.5	0.42
1892	351.6	0
1893	352.3	0
1894	352.4	0.86
1895	352.5	0.82
1896	352.6	0
1897	352.9	0
1898	353	13.24
1899	353.1	30.05
1900	353.2	27.61
1901	353.3	12.77
1902	353.4	1.65
1903	353.5	0
1904	353.6	0.07
1905	353.7	1.24
1906	353.8	0.61
1907	353.9	0
1908	354.1	0
1909	354.2	3.65
1910	354.3	1.98
1911	354.4	0
1912	354.6	0
1913	354.7	29.51
1914	354.8	87.46
1915	354.9	111.57
1916	355	93.03
1917	355.1	55.27
1918	355.2	23.05
1919	355.3	4.77
1920	355.4	0.06
1921	355.5	2.1
1922	355.6	2.19
1923	355.7	0
1924	357.3	0
1925	357.4	6.76
1926	357.5	6.93
1927	357.6	3.98
1928	357.7	2.35
1929	357.8	3.71
1930	357.9	6.05
1931	358	6.27
1932	358.1	4.42
1933	358.2	3.32
1934	358.3	3.85
1935	358.4	3.8
1936	358.5	1.72
1937	358.6	0
1938	359.2	0
1939	359.3	0.26
1940	359.4	0
1941	360.5	0
1942	360.6	0.2
1943	360.7	0.82
1944	360.8	0
1945	361.4	0
1946	361.5	14.18
1947	361.6	79.16
1948	361.7	183.57
1949	361.8	291.01
1950	361.9	402.87
1951	362	523.95
1952	362.1	630.24
1953	362.2	659.54
1954	362.3	567.61
1955	362.4	383.33
1956	362.5	192.32
1957	362.6	59.91
1958	362.7	26.01
1959	362.8	28.13
1960	362.9	56.15
1961	363	77.65
1962	363.1	87.23
1963	363.2	111.85
1964	363.3	146.12
1965	363.4	149.7
1966	363.5	101.46
1967	363.6	37.14
1968	363.7	1.38
1969	363.8	0
1970	363.9	0
1971	364	0.37
1972	364.1	2.46
1973	364.2	2.85
1974	364.3	2.23
1975	364.4	1.22
1976	364.5	0.44
1977	364.6	0.52
1978	364.7	1.4
1979	364.8	1.99
1980	364.9	1.12
1981	365	0
1982	365.2	0
1983	365.3	0.1
1984	365.4	0.62
1985	365.5	0.22
1986	365.6	0.67
1987	365.7	4.53
1988	365.8	9.49
1989	365.9	11.51
1990	366	9.3
1991	366.1	5.64
1992	366.2	3.57
1993	366.3	3.57
1994	366.4	2.18
1995	366.5	1.23
1996	366.6	1.16
1997	366.7	2.19
[truncated: 1,506 more rows]

## Sheet: Sheet9
+ESI Scan (rt: 10.71-11.02 min, 67 scans) Frag=100.0V CF=0.000 DF=0.000 4608-02.d Subtract
Index	X	Y
0	50	0
1	50.1	0
2	50.2	0.26
3	50.3	0.44
4	50.4	0.48
5	50.5	0.56
6	50.6	0.68
7	50.7	0.57
8	50.8	0.11
9	50.9	0
10	51	0
11	51.1	0.1
12	51.2	0.18
13	51.3	0
14	51.6	0
15	51.7	0.07
16	51.8	0.08
17	51.9	0.03
18	52	0.13
19	52.1	0.26
20	52.2	0.25
21	52.3	0.19
22	52.4	0.3
23	52.5	0.4
24	52.6	0
25	53.4	0
26	53.5	0.17
27	53.6	0.83
28	53.7	1.15
29	53.8	0.87
30	53.9	0.29
31	54	0.12
32	54.1	0.46
33	54.2	0.53
34	54.3	0.07
35	54.4	0.34
36	54.5	5.06
37	54.6	12
38	54.7	16.9
39	54.8	20.03
40	54.9	15.3
41	55	5.01
42	55.1	2.3
43	55.2	11.73
44	55.3	17.61
45	55.4	5.83
46	55.5	0
47	55.6	0
48	55.7	2.19
49	55.8	3.91
50	55.9	1.95
51	56	5.7
52	56.1	8.74
53	56.2	11.29
54	56.3	11.63
55	56.4	5.85
56	56.5	0
57	56.8	0
58	56.9	115.47
59	57	185.67
60	57.1	159.07
61	57.2	131.88
62	57.3	177.82
63	57.4	224.94
64	57.5	176.68
65	57.6	57.12
66	57.7	0
67	58	0
68	58.1	9.3
69	58.2	60.87
70	58.3	58.89
71	58.4	0
72	58.6	0
73	58.7	127.35
74	58.8	569.79
75	58.9	745.19
76	59	677.03
77	59.1	706.95
78	59.2	860.95
79	59.3	757.37
80	59.4	272.58
81	59.5	0
82	59.7	0
83	59.8	51.06
84	59.9	122.17
85	60	168.48
86	60.1	151.9
87	60.2	125.68
88	60.3	110.45
89	60.4	85.05
90	60.5	49.78
91	60.6	138.28
92	60.7	400.58
93	60.8	787.04
94	60.9	972.16
95	61	780.95
96	61.1	403.07
97	61.2	163.44
98	61.3	171.07
99	61.4	293.2
100	61.5	370.89
101	61.6	352.09
102	61.7	203.62
103	61.8	39.42
104	61.9	46.25
105	62	11.75
106	62.1	2.88
107	62.2	33.29
108	62.3	41.36
109	62.4	0
110	62.7	0
111	62.8	10.91
112	62.9	16.33
113	63	14.19
114	63.1	1
115	63.2	0
116	64.2	0
117	64.3	7.49
118	64.4	4.59
119	64.5	3.48
120	64.6	1.57
121	64.7	0.69
122	64.8	0.17
123	64.9	0
124	65.1	0
125	65.2	0.14
126	65.3	0.98
127	65.4	1.3
128	65.5	0.74
129	65.6	0
130	66.1	0
131	66.2	0.45
132	66.3	0.8
133	66.4	0.65
134	66.5	0.26
135	66.6	0.35
136	66.7	2.03
137	66.8	5.91
138	66.9	11.09
139	67	14.54
140	67.1	12.75
141	67.2	5.67
142	67.3	0
143	67.8	0
144	67.9	1.72
145	68	4.03
146	68.1	4.69
147	68.2	1.59
148	68.3	0
149	68.5	0
150	68.6	21.67
151	68.7	81.95
152	68.8	131.61
153	68.9	137.01
154	69	88.81
155	69.1	25.39
156	69.2	0
157	69.5	0
158	69.6	12.07
159	69.7	63.71
160	69.8	51.82
161	69.9	9.33
162	70	0
163	70.1	0
164	70.2	5.35
165	70.3	9.16
166	70.4	10.94
167	70.5	0
168	70.6	15.08
169	70.7	47.56
170	70.8	39.17
171	70.9	0
172	71.4	0
173	71.5	54.42
174	71.6	135.57
175	71.7	94.6
176	71.8	30.06
177	71.9	43.35
178	72	68.62
179	72.1	94.75
180	72.2	123.44
181	72.3	111.79
182	72.4	19.66
183	72.5	0
184	72.6	0
185	72.7	146.79
186	72.8	257.25
187	72.9	22.67
188	73	0
189	73.1	0
190	73.2	193.09
191	73.3	0
192	73.6	0
193	73.7	106.79
194	73.8	18.65
195	73.9	0
196	74.1	0
197	74.2	21.42
198	74.3	118.54
199	74.4	84.44
200	74.5	6.52
201	74.6	11.45
202	74.7	83.29
203	74.8	86.19
204	74.9	0
205	75.3	0
206	75.4	44.31
207	75.5	53.21
208	75.6	48.17
209	75.7	27.62
210	75.8	7.65
211	75.9	0
212	76	5.37
213	76.1	13.4
214	76.2	9.9
215	76.3	0
216	76.6	0
217	76.7	23.29
218	76.8	65.62
219	76.9	109.88
220	77	139.27
221	77.1	142.76
222	77.2	119.76
223	77.3	75.75
224	77.4	26.13
225	77.5	0
226	78.3	0
227	78.4	9.55
228	78.5	0
229	78.8	0
230	78.9	86.79
231	79	160.88
232	79.1	143.44
233	79.2	90.31
234	79.3	63.18
235	79.4	63.53
236	79.5	54.79
237	79.6	29.19
238	79.7	1.6
239	79.8	0
240	80.8	0
241	80.9	61.84
242	81	81.99
243	81.1	56.07
244	81.2	43.42
245	81.3	62.83
246	81.4	78.43
247	81.5	69.06
248	81.6	35.67
249	81.7	22.65
250	81.8	0
251	82.7	0
252	82.8	16.94
253	82.9	38.2
254	83	45.53
255	83.1	35.5
256	83.2	7.2
257	83.3	0
258	84.1	0
259	84.2	39.47
260	84.3	123.09
261	84.4	113.9
262	84.5	45.97
263	84.6	29.16
264	84.7	81.05
265	84.8	125.49
266	84.9	109.74
267	85	55.73
268	85.1	20.95
269	85.2	28.62
270	85.3	40.8
271	85.4	19.9
272	85.5	0
273	86.4	0
274	86.5	15.47
275	86.6	47.19
276	86.7	71.18
277	86.8	61.37
278	86.9	24.28
279	87	6.24
280	87.1	31.36
281	87.2	72.02
282	87.3	85.72
283	87.4	58.99
284	87.5	22.84
285	87.6	0
286	88	0
287	88.1	34.34
288	88.2	65.2
289	88.3	33.96
290	88.4	0
291	89	0
292	89.1	719.74
293	89.2	1256.85
294	89.3	1376.09
295	89.4	1111.67
296	89.5	551.22
297	89.6	0
298	89.8	0
299	89.9	94.28
300	90	488.36
301	90.1	505.18
302	90.2	211.64
303	90.3	0
304	90.5	0
305	90.6	68.31
306	90.7	47.53
307	90.8	0
308	91	0
309	91.1	207.71
310	91.2	315.73
311	91.3	239.58
312	91.4	96.1
313	91.5	23.07
314	91.6	19.28
315	91.7	0
316	92	0
317	92.1	4.59
318	92.2	26.32
319	92.3	27.15
320	92.4	15.86
321	92.5	4.72
322	92.6	0
323	93.1	0
324	93.2	23.74
325	93.3	35.04
326	93.4	20.49
327	93.5	7
328	93.6	0.47
329	93.7	0
330	94	0
331	94.1	0.68
332	94.2	0.16
333	94.3	0
334	94.7	0
335	94.8	6.96
336	94.9	21.62
337	95	30.43
338	95.1	27.44
339	95.2	19.59
340	95.3	13.31
341	95.4	10.29
342	95.5	4.65
343	95.6	1.17
344	95.7	3.7
345	95.8	12.49
346	95.9	22.1
347	96	23.38
348	96.1	10.43
349	96.2	0
350	96.4	0
351	96.5	10.59
352	96.6	25.48
353	96.7	28.56
354	96.8	29.96
355	96.9	24.54
356	97	6.36
357	97.1	3.43
358	97.2	43.8
359	97.3	96.33
360	97.4	108.37
361	97.5	67.44
362	97.6	16.59
363	97.7	6.21
364	97.8	0
365	98.2	0
366	98.3	47.06
367	98.4	248.35
368	98.5	374.27
369	98.6	281.7
370	98.7	33.33
371	98.8	0
372	99	0
373	99.1	216.74
374	99.2	451.06
375	99.3	551.61
376	99.4	463.85
377	99.5	286.19
378	99.6	127.64
379	99.7	70.75
380	99.8	36.25
381	99.9	0
382	100	0
383	100.1	50.88
384	100.2	108.15
385	100.3	77.4
386	100.4	0
387	100.6	0
388	100.7	113.74
389	100.8	163.76
390	100.9	47.46
391	101	0
392	101.1	0
393	101.2	40.48
394	101.3	91.36
395	101.4	40.06
396	101.5	0
397	101.6	79.77
398	101.7	137.67
399	101.8	0
400	102.5	0
401	102.6	93.31
402	102.7	172.76
403	102.8	81.29
404	102.9	0
405	103.4	0
406	103.5	37.49
407	103.6	70.72
408	103.7	38.37
409	103.8	35.62
410	103.9	80.09
411	104	117.96
412	104.1	115.98
413	104.2	87.22
414	104.3	66.67
415	104.4	68.87
416	104.5	59.37
417	104.6	21.1
418	104.7	0
419	104.9	0
420	105	15.63
421	105.1	20.16
422	105.2	0
423	105.4	0
424	105.5	1.66
425	105.6	34.1
426	105.7	59.03
427	105.8	76.13
428	105.9	91.96
429	106	96.8
430	106.1	70.72
431	106.2	33.48
432	106.3	0
433	106.4	0
434	106.5	17.66
435	106.6	141.58
436	106.7	300.89
437	106.8	399.27
438	106.9	341.79
439	107	160.31
440	107.1	41.55
441	107.2	137.71
442	107.3	346.08
443	107.4	407.11
444	107.5	244.49
445	107.6	36.83
446	107.7	0
447	107.8	0
448	107.9	44.5
449	108	76.04
450	108.1	77.52
451	108.2	66.31
452	108.3	66.02
453	108.4	85.76
454	108.5	108.21
455	108.6	104.02
456	108.7	79.67
457	108.8	12.56
458	108.9	0
459	109.1	0
460	109.2	62.37
461	109.3	70.85
462	109.4	14.45
463	109.5	0
464	109.7	0
465	109.8	7.03
466	109.9	22.95
467	110	26.5
468	110.1	17.43
469	110.2	3.51
470	110.3	0
471	110.7	0
472	110.8	88.65
473	110.9	133.4
474	111	86.91
475	111.1	0
476	111.3	0
477	111.4	34.93
478	111.5	93.62
479	111.6	79.11
480	111.7	35.85
481	111.8	21.41
482	111.9	4.05
483	112	0
484	112.1	15.86
485	112.2	66.08
486	112.3	107.53
487	112.4	104.56
488	112.5	50.03
489	112.6	0
490	112.7	0
491	112.8	58.74
492	112.9	115.92
493	113	150.53
494	113.1	197.75
495	113.2	278.36
496	113.3	331.96
497	113.4	281.65
498	113.5	161.97
499	113.6	90.97
500	113.7	85.32
501	113.8	44.09
502	113.9	0
503	114.1	0
504	114.2	2.64
505	114.3	109.07
506	114.4	134.66
507	114.5	130.1
508	114.6	165.1
509	114.7	77.1
510	114.8	0
511	115	0
512	115.1	258.18
513	115.2	245.72
514	115.3	0
515	116.1	0
516	116.2	98.98
517	116.3	146.84
518	116.4	112.49
519	116.5	37.35
520	116.6	0
521	117.3	0
522	117.4	37.86
523	117.5	48.23
524	117.6	26.61
525	117.7	0
526	117.8	5.61
527	117.9	34.79
528	118	42.18
529	118.1	28.52
530	118.2	30.67
531	118.3	94.55
532	118.4	305.02
533	118.5	741.76
534	118.6	1364.43
535	118.7	1989.85
536	118.8	2441.98
537	118.9	2687.39
538	119	2801.71
539	119.1	2856.07
540	119.2	2805.27
541	119.3	2470.52
542	119.4	1743.11
543	119.5	833.79
544	119.6	169.28
545	119.7	0
546	119.8	6.83
547	119.9	62.95
548	120	77.05
549	120.1	74.25
550	120.2	101.95
551	120.3	119.57
552	120.4	47.42
553	120.5	0
554	120.8	0
555	120.9	81.06
556	121	0
557	121.2	0
558	121.3	237.53
559	121.4	402.41
560	121.5	330.97
561	121.6	162.71
562	121.7	84.88
563	121.8	141.12
564	121.9	113.44
565	122	0
566	122.3	0
567	122.4	6.34
568	122.5	44.17
569	122.6	139.5
570	122.7	240.61
571	122.8	256.01
572	122.9	183.73
573	123	100.08
574	123.1	55.5
575	123.2	30.24
576	123.3	0
577	123.6	0
578	123.7	43.78
579	123.8	102.36
580	123.9	132.78
581	124	113.2
582	124.1	44.1
583	124.2	0
584	124.8	0
585	124.9	28.84
586	125	32.74
587	125.1	14.17
588	125.2	2.08
589	125.3	10.04
590	125.4	15.05
591	125.5	11.74
592	125.6	0
593	125.8	0
594	125.9	36.23
595	126	76.14
596	126.1	53.11
597	126.2	0
598	126.8	0
599	126.9	17.12
600	127	98.22
601	127.1	155.83
602	127.2	172.2
603	127.3	149.24
604	127.4	111.34
605	127.5	70.74
606	127.6	44.22
607	127.7	13.49
608	127.8	0
609	128.3	0
610	128.4	8.88
611	128.5	40.35
612	128.6	34.49
613	128.7	58.88
614	128.8	122.88
615	128.9	157.59
616	129	100.18
617	129.1	0
618	129.4	0
619	129.5	35.14
620	129.6	78.42
621	129.7	45.19
622	129.8	34.75
623	129.9	60.47
624	130	79.18
625	130.1	38.5
626	130.2	0
627	130.3	6.33
628	130.4	106.03
629	130.5	205.03
630	130.6	244.34
631	130.7	246.49
632	130.8	214.36
633	130.9	92.55
634	131	0
635	131.2	0
636	131.3	59.3
637	131.4	187.79
638	131.5	174.51
639	131.6	92.78
640	131.7	22.72
641	131.8	0
642	131.9	0
643	132	25.41
644	132.1	16.03
645	132.2	0
646	132.4	0
647	132.5	14.39
648	132.6	158
649	132.7	224.61
650	132.8	188.61
651	132.9	88.88
652	133	0
653	133.3	0
654	133.4	21.25
655	133.5	0
656	133.8	0
657	133.9	31.11
658	134	13.32
659	134.1	0
660	134.2	6.82
661	134.3	51.86
662	134.4	117.44
663	134.5	209.67
664	134.6	340.31
665	134.7	515.04
666	134.8	678.71
667	134.9	765.31
668	135	759.08
669	135.1	707.87
670	135.2	655.02
671	135.3	563.99
672	135.4	399.07
673	135.5	178.76
674	135.6	0
675	135.8	0
676	135.9	5.12
677	136	81.74
678	136.1	94
679	136.2	17.82
680	136.3	0
681	136.4	0
682	136.5	156.91
683	136.6	446.32
684	136.7	579.79
685	136.8	402.7
686	136.9	0
687	137.3	0
688	137.4	155.29
689	137.5	256.86
690	137.6	183.79
691	137.7	108.92
692	137.8	106.19
693	137.9	69.3
694	138	9.38
695	138.1	0
696	138.2	0
697	138.3	12.3
698	138.4	0
699	138.9	0
700	139	35.37
701	139.1	112.1
702	139.2	165.34
703	139.3	148.37
704	139.4	91.91
705	139.5	42.69
706	139.6	27.45
707	139.7	5.5
708	139.8	0
709	140.2	0
710	140.3	22.78
711	140.4	64.86
712	140.5	86.03
713	140.6	82.11
714	140.7	52.14
715	140.8	16.98
716	140.9	0
717	141.5	0
718	141.6	40.28
719	141.7	61.64
720	141.8	41.26
721	141.9	0
722	142.2	0
723	142.3	7.17
724	142.4	80.23
725	142.5	25.23
726	142.6	0
727	143.7	0
728	143.8	19.36
729	143.9	52.04
730	144	83.21
731	144.1	114.9
732	144.2	131.31
733	144.3	78.16
734	144.4	0
735	144.7	0
736	144.8	13.48
737	144.9	71.65
738	145	182.67
739	145.1	380.11
740	145.2	458.01
741	145.3	262.68
742	145.4	0
743	145.7	0
744	145.8	75.7
745	145.9	108.67
746	146	72.06
747	146.1	26.52
748	146.2	6.28
749	146.3	0.77
750	146.4	0
751	146.6	0
752	146.7	18.57
753	146.8	39.92
754	146.9	27.36
755	147	0
756	147.2	0
757	147.3	3.92
758	147.4	26.51
759	147.5	20.22
760	147.6	11.28
761	147.7	12.79
762	147.8	8.29
763	147.9	0
764	148.5	0
765	148.6	36.81
766	148.7	118.73
767	148.8	128.67
768	148.9	88.91
769	149	69.23
770	149.1	79.25
771	149.2	73.18
772	149.3	33
773	149.4	1.69
774	149.5	0
775	149.7	0
776	149.8	16.56
777	149.9	37.07
778	150	2.82
779	150.1	0
780	150.4	0
781	150.5	31.67
782	150.6	12.92
783	150.7	0
784	150.8	0
785	150.9	75.81
786	151	191.64
787	151.1	155.83
788	151.2	11.93
789	151.3	0
790	151.7	0
791	151.8	0.24
792	151.9	6.49
793	152	6.24
794	152.1	4.92
795	152.2	16.36
796	152.3	56.8
797	152.4	97.08
798	152.5	88.87
799	152.6	23.66
800	152.7	0
801	153.6	0
802	153.7	16.98
803	153.8	54
804	153.9	77.23
805	154	50.62
806	154.1	18.24
807	154.2	17.04
808	154.3	44.56
809	154.4	61.79
810	154.5	32.98
811	154.6	0
812	155	0
813	155.1	38.61
814	155.2	73.7
815	155.3	47.12
816	155.4	0
817	155.6	0
818	155.7	11.7
819	155.8	58.09
820	155.9	79.42
821	156	74.17
822	156.1	60.91
823	156.2	51.11
824	156.3	40.65
825	156.4	32.97
826	156.5	28.23
827	156.6	8.14
828	156.7	0
829	157	0
830	157.1	23.67
831	157.2	173.31
832	157.3	218.85
833	157.4	135.65
834	157.5	45.11
835	157.6	21.18
836	157.7	54.17
837	157.8	96.25
838	157.9	105.9
839	158	77.78
840	158.1	46.28
841	158.2	24.69
842	158.3	0
843	158.5	0
844	158.6	48.12
845	158.7	138.97
846	158.8	178.19
847	158.9	162.87
848	159	130.95
849	159.1	105.9
850	159.2	75.11
851	159.3	36.1
852	159.4	8.99
853	159.5	7.99
854	159.6	20.97
855	159.7	25.2
856	159.8	22.27
857	159.9	19.11
858	160	17.15
859	160.1	17.43
860	160.2	21.3
861	160.3	40.61
862	160.4	64.06
863	160.5	0
864	160.9	0
865	161	111.09
866	161.1	215.64
867	161.2	301.33
868	161.3	357.73
869	161.4	297.35
870	161.5	135.47
871	161.6	34.23
872	161.7	0
873	162.1	0
874	162.2	7.3
875	162.3	0
876	163.1	0
877	163.2	6.44
878	163.3	21.27
879	163.4	19.68
880	163.5	2.3
881	163.6	0
882	163.8	0
883	163.9	16.75
884	164	26.34
885	164.1	21.74
886	164.2	3.67
887	164.3	0
888	164.7	0
889	164.8	19.76
890	164.9	50.07
891	165	60.12
892	165.1	42.1
893	165.2	11.51
894	165.3	0
895	166.2	0
896	166.3	16.53
897	166.4	34.94
898	166.5	47.01
899	166.6	63.23
900	166.7	88.6
901	166.8	101.07
902	166.9	86.82
903	167	60.34
904	167.1	50.16
905	167.2	63.75
906	167.3	73.14
907	167.4	61.8
908	167.5	28.1
909	167.6	0.25
910	167.7	0
911	167.8	16.34
912	167.9	29.97
913	168	30.64
914	168.1	19.25
915	168.2	4.85
916	168.3	0
917	168.9	0
918	169	1.82
919	169.1	25.14
920	169.2	41.87
921	169.3	30.02
922	169.4	0
923	169.6	0
924	169.7	7.77
925	169.8	55.57
926	169.9	68.05
927	170	41.84
928	170.1	7.62
929	170.2	0
930	170.7	0
931	170.8	77.29
932	170.9	219.64
933	171	278.79
934	171.1	207.8
935	171.2	51.08
936	171.3	0
937	171.5	0
938	171.6	18.76
939	171.7	28.55
940	171.8	0
941	172.2	0
942	172.3	11.09
943	172.4	25.27
944	172.5	37.75
945	172.6	40.49
946	172.7	37.04
947	172.8	55.12
948	172.9	90.07
949	173	113.78
950	173.1	82.92
951	173.2	3.54
952	173.3	0
953	173.7	0
954	173.8	1.66
955	173.9	6.09
956	174	13.23
957	174.1	17.4
958	174.2	16.52
959	174.3	12.7
960	174.4	11.07
961	174.5	14.56
962	174.6	17.02
963	174.7	12.89
964	174.8	0
965	175.3	0
966	175.4	3.7
967	175.5	7.63
968	175.6	9.91
969	175.7	11.33
970	175.8	2.04
971	175.9	0
972	176.2	0
973	176.3	2.81
974	176.4	20.86
975	176.5	44.14
976	176.6	81.67
977	176.7	128.54
978	176.8	185.29
979	176.9	206.19
980	177	174.58
981	177.1	108.42
982	177.2	48.1
983	177.3	10.12
984	177.4	0
985	177.5	3.79
986	177.6	25.2
987	177.7	28.22
988	177.8	3.97
989	177.9	0
990	178.1	0
991	178.2	22.57
992	178.3	52.13
993	178.4	79.29
994	178.5	93.75
995	178.6	93.82
996	178.7	80.45
997	178.8	87.75
998	178.9	120.91
999	179	142.69
1000	179.1	105.41
1001	179.2	24.71
1002	179.3	0
1003	179.4	0
1004	179.5	4.9
1005	179.6	25.76
1006	179.7	24.09
1007	179.8	3.16
1008	179.9	0
1009	180.3	0
1010	180.4	5.06
1011	180.5	5.95
1012	180.6	0
1013	180.8	0
1014	180.9	28.67
1015	181	84.47
1016	181.1	130.66
1017	181.2	135.72
1018	181.3	95.26
1019	181.4	37.33
1020	181.5	0
1021	181.6	0
1022	181.7	2.12
1023	181.8	17.99
1024	181.9	23.38
1025	182	16.85
1026	182.1	10.37
1027	182.2	11.43
1028	182.3	12.65
1029	182.4	4.3
1030	182.5	2.06
1031	182.6	30.01
1032	182.7	80.44
1033	182.8	110.72
1034	182.9	107.84
1035	183	111.28
1036	183.1	141.38
1037	183.2	153.52
1038	183.3	104.56
1039	183.4	27.6
1040	183.5	0
1041	183.6	0
1042	183.7	1.76
1043	183.8	17.26
1044	183.9	31.18
1045	184	33.64
1046	184.1	24.92
1047	184.2	18.94
1048	184.3	21.14
1049	184.4	21.2
1050	184.5	0
1051	184.8	0
1052	184.9	24.8
1053	185	61.98
1054	185.1	69.01
1055	185.2	59.23
1056	185.3	47.66
1057	185.4	32.68
1058	185.5	6.75
1059	185.6	0
1060	185.7	0
1061	185.8	18.39
1062	185.9	31.49
1063	186	20.49
1064	186.1	3.21
1065	186.2	0.81
1066	186.3	10.82
1067	186.4	19.24
1068	186.5	13.28
1069	186.6	0
1070	187.7	0
1071	187.8	23.38
1072	187.9	33.91
1073	188	25.84
1074	188.1	12.23
1075	188.2	5.33
1076	188.3	7.43
1077	188.4	12.15
1078	188.5	17.21
1079	188.6	21.48
1080	188.7	24.61
1081	188.8	28.7
1082	188.9	37.3
1083	189	44.58
1084	189.1	39.28
1085	189.2	16.59
1086	189.3	0
1087	189.7	0
1088	189.8	10.29
1089	189.9	17.58
1090	190	20.68
1091	190.1	22.32
1092	190.2	20.77
1093	190.3	10.89
1094	190.4	0.77
1095	190.5	20.76
1096	190.6	65.75
1097	190.7	98.1
1098	190.8	95.3
1099	190.9	79.24
1100	191	76.11
1101	191.1	73.58
1102	191.2	58.2
1103	191.3	34.57
1104	191.4	12.28
1105	191.5	0
1106	191.7	0
1107	191.8	3.23
1108	191.9	28.94
1109	192	35.81
1110	192.1	23.75
1111	192.2	2.49
1112	192.3	0
1113	192.8	0
1114	192.9	39.69
1115	193	34.4
1116	193.1	0
1117	193.9	0
1118	194	14.48
1119	194.1	33.32
1120	194.2	35.53
1121	194.3	25.41
1122	194.4	31.01
1123	194.5	71.71
1124	194.6	123.96
1125	194.7	134.72
1126	194.8	89.63
1127	194.9	8.62
1128	195	0
1129	195.7	0
1130	195.8	7.03
1131	195.9	23.72
1132	196	28.06
1133	196.1	21.99
1134	196.2	18.51
1135	196.3	19.19
1136	196.4	11.2
1137	196.5	0
1138	196.7	0
1139	196.8	5.92
1140	196.9	24.38
1141	197	25.86
1142	197.1	27.09
1143	197.2	37.2
1144	197.3	42.93
1145	197.4	35.15
1146	197.5	23.34
1147	197.6	7.8
1148	197.7	0
1149	198.2	0
1150	198.3	1.08
1151	198.4	0
1152	199.4	0
1153	199.5	2.6
1154	199.6	9.98
1155	199.7	0
1156	200.8	0
1157	200.9	0.68
1158	201	36.02
1159	201.1	19.2
1160	201.2	0
1161	201.5	0
1162	201.6	8.88
1163	201.7	26.94
1164	201.8	2.48
1165	201.9	0
1166	202.2	0
1167	202.3	4.41
1168	202.4	22.56
1169	202.5	38.68
1170	202.6	46.42
1171	202.7	49
1172	202.8	49.37
1173	202.9	42.3
1174	203	25.67
1175	203.1	9.98
1176	203.2	6.46
1177	203.3	12.83
1178	203.4	18.72
1179	203.5	14.89
1180	203.6	2.28
1181	203.7	0
1182	203.8	0
1183	203.9	5.41
1184	204	15.32
1185	204.1	13.39
1186	204.2	0.41
1187	204.3	0
1188	205.1	0
1189	205.2	33.89
1190	205.3	36.86
1191	205.4	6.99
1192	205.5	0
1193	205.8	0
1194	205.9	17.39
1195	206	41.38
1196	206.1	51.06
1197	206.2	56.88
1198	206.3	49
1199	206.4	23.99
1200	206.5	0
1201	206.6	0
1202	206.7	1.63
1203	206.8	61.43
1204	206.9	58.16
1205	207	0
1206	207.5	0
1207	207.6	12.62
1208	207.7	41.32
1209	207.8	53.85
1210	207.9	53
1211	208	54.42
1212	208.1	65.55
1213	208.2	74.53
1214	208.3	64.81
1215	208.4	40.01
1216	208.5	22.91
1217	208.6	22.12
1218	208.7	29.47
1219	208.8	34.14
1220	208.9	37.34
1221	209	32.77
1222	209.1	16.38
1223	209.2	1.43
1224	209.3	2.23
1225	209.4	16.63
1226	209.5	24.47
1227	209.6	15.24
1228	209.7	0.92
1229	209.8	0
1230	210.1	0
1231	210.2	4.76
1232	210.3	17.84
1233	210.4	19.9
1234	210.5	10.86
1235	210.6	0
1236	211.5	0
1237	211.6	3.33
1238	211.7	8.72
1239	211.8	10.41
1240	211.9	5.69
1241	212	0
1242	212.3	0
1243	212.4	6.28
1244	212.5	30.15
1245	212.6	53.73
1246	212.7	67.58
1247	212.8	73.66
1248	212.9	77.23
1249	213	74.32
1250	213.1	52.29
1251	213.2	12.67
1252	213.3	0
1253	213.4	0
1254	213.5	0.82
1255	213.6	6.99
1256	213.7	0
1257	213.8	0
1258	213.9	4.86
1259	214	43.35
1260	214.1	70.5
1261	214.2	60.26
1262	214.3	19.43
1263	214.4	0
1264	215.4	0
1265	215.5	1.4
1266	215.6	6.28
1267	215.7	7.79
1268	215.8	5.41
1269	215.9	2.83
1270	216	2.31
1271	216.1	6.61
1272	216.2	13.76
1273	216.3	17.15
1274	216.4	9.69
1275	216.5	0
1276	216.9	0
1277	217	16.83
1278	217.1	26.12
1279	217.2	25.95
1280	217.3	29.64
1281	217.4	35.57
1282	217.5	32.82
1283	217.6	17.79
1284	217.7	0
1285	217.8	0
1286	217.9	0.22
1287	218	18.79
1288	218.1	29.06
1289	218.2	28.18
1290	218.3	22.41
1291	218.4	0
1292	219.4	0
1293	219.5	5.56
1294	219.6	5.02
1295	219.7	0
1296	221.1	0
1297	221.2	6.08
1298	221.3	8.1
1299	221.4	14.92
1300	221.5	16.73
1301	221.6	11.5
1302	221.7	0
1303	222.4	0
1304	222.5	387.79
1305	222.6	692.58
1306	222.7	639.78
1307	222.8	357.77
1308	222.9	130.07
1309	223	126.41
1310	223.1	306.09
1311	223.2	458.92
1312	223.3	389.71
1313	223.4	152.15
1314	223.5	1.63
1315	223.6	15.28
1316	223.7	55.99
1317	223.8	0
1318	224.4	0
1319	224.5	31.53
1320	224.6	283.13
1321	224.7	619.74
1322	224.8	940.08
1323	224.9	1073.48
1324	225	936.75
1325	225.1	605.82
1326	225.2	254.67
1327	225.3	28.49
1328	225.4	0
1329	225.5	0
1330	225.6	16.44
1331	225.7	61.67
1332	225.8	110.19
1333	225.9	127.29
1334	226	91.56
1335	226.1	31.27
1336	226.2	0
1337	227.4	0
1338	227.5	22.6
1339	227.6	27.58
1340	227.7	0
1341	228.2	0
1342	228.3	3.16
1343	228.4	16.22
1344	228.5	10.16
1345	228.6	0
1346	228.9	0
1347	229	9.47
1348	229.1	35.13
1349	229.2	39.92
1350	229.3	24.86
1351	229.4	2.92
1352	229.5	0
1353	230.1	0
1354	230.2	14.5
1355	230.3	45.37
1356	230.4	60.74
1357	230.5	54.67
1358	230.6	32.35
1359	230.7	7.42
1360	230.8	0
1361	230.9	0
1362	231	16.43
1363	231.1	50.48
1364	231.2	60.53
1365	231.3	38.26
1366	231.4	8.53
1367	231.5	0
1368	232.2	0
1369	232.3	17.19
1370	232.4	25.99
1371	232.5	20.95
1372	232.6	0
1373	233	0
1374	233.1	1.19
1375	233.2	30.72
1376	233.3	38.97
1377	233.4	31.34
1378	233.5	18.64
1379	233.6	14.71
1380	233.7	20.1
1381	233.8	21.34
1382	233.9	11.64
1383	234	2.82
1384	234.1	13.3
1385	234.2	47.64
1386	234.3	98.17
1387	234.4	131.26
1388	234.5	132.56
1389	234.6	107.16
1390	234.7	96.52
1391	234.8	147.18
1392	234.9	240.81
1393	235	332.98
1394	235.1	385.46
1395	235.2	377.17
1396	235.3	303.45
1397	235.4	194.97
1398	235.5	116.4
1399	235.6	98.22
1400	235.7	76.42
1401	235.8	45.08
1402	235.9	31.68
1403	236	46.52
1404	236.1	63.98
1405	236.2	58.05
1406	236.3	38.29
1407	236.4	19.65
1408	236.5	0
1409	236.8	0
1410	236.9	12.79
1411	237	87.14
1412	237.1	99.06
1413	237.2	43.37
1414	237.3	0
1415	237.6	0
1416	237.7	5.04
1417	237.8	0.78
1418	237.9	0
1419	238.1	0
1420	238.2	0.25
1421	238.3	2.57
1422	238.4	0
1423	238.8	0
1424	238.9	7.88
1425	239	13.28
1426	239.1	16.52
1427	239.2	16.34
1428	239.3	12.93
1429	239.4	11.21
1430	239.5	9.82
1431	239.6	0
1432	240.5	0
1433	240.6	14.89
1434	240.7	43.85
1435	240.8	69.28
1436	240.9	77.07
1437	241	57.75
1438	241.1	12.68
1439	241.2	0
1440	241.5	0
1441	241.6	15.83
1442	241.7	21.14
1443	241.8	22.24
1444	241.9	22.69
1445	242	14.04
1446	242.1	1.54
1447	242.2	0
1448	242.3	7.3
1449	242.4	17.64
1450	242.5	13.21
1451	242.6	0
1452	242.7	0
1453	242.8	7.66
1454	242.9	22.06
1455	243	17.48
1456	243.1	0
1457	245.2	0
1458	245.3	5.58
1459	245.4	8.39
1460	245.5	7.05
1461	245.6	2.75
1462	245.7	0
1463	246.1	0
1464	246.2	10.59
1465	246.3	31.73
1466	246.4	37.97
1467	246.5	30.19
1468	246.6	20.11
1469	246.7	13.86
1470	246.8	11.26
1471	246.9	9.08
1472	247	9.73
1473	247.1	16.06
1474	247.2	25.77
1475	247.3	35.12
1476	247.4	45.3
1477	247.5	56.06
1478	247.6	60.69
1479	247.7	51.88
1480	247.8	31.48
1481	247.9	8.99
1482	248	0
1483	248.1	0
1484	248.2	7.96
1485	248.3	9.29
1486	248.4	0
1487	249.4	0
1488	249.5	7.74
1489	249.6	11.16
1490	249.7	7.71
1491	249.8	6.35
1492	249.9	6.42
1493	250	3.44
1494	250.1	0
1495	252.5	0
1496	252.6	18.18
1497	252.7	49.14
1498	252.8	50.6
1499	252.9	25.22
1500	253	0
1501	253.7	0
1502	253.8	2.18
1503	253.9	9.01
1504	254	7.77
1505	254.1	4.23
1506	254.2	1.53
1507	254.3	0
1508	254.6	0
1509	254.7	4.89
1510	254.8	13.64
1511	254.9	17.13
1512	255	14.96
1513	255.1	21.45
1514	255.2	41.71
1515	255.3	62.82
1516	255.4	76.6
1517	255.5	93.68
1518	255.6	125.74
1519	255.7	160.88
1520	255.8	184.69
1521	255.9	186.74
1522	256	163.24
1523	256.1	133.83
1524	256.2	112.35
1525	256.3	96.49
1526	256.4	66.13
1527	256.5	21.67
1528	256.6	0
1529	256.7	0
1530	256.8	3.24
1531	256.9	23.59
1532	257	37.11
1533	257.1	40.96
1534	257.2	33.22
1535	257.3	15.26
1536	257.4	9.05
1537	257.5	22.14
1538	257.6	48.09
1539	257.7	81.15
1540	257.8	110.37
1541	257.9	125.97
1542	258	121.32
1543	258.1	103.75
1544	258.2	106.75
1545	258.3	127.96
1546	258.4	130.57
1547	258.5	87.48
1548	258.6	21.46
1549	258.7	0
1550	259	0
1551	259.1	11.26
1552	259.2	15.81
1553	259.3	9.05
1554	259.4	2.46
1555	259.5	0
1556	260.1	0
1557	260.2	24.68
1558	260.3	29.62
1559	260.4	21.72
1560	260.5	10.52
1561	260.6	2.21
1562	260.7	0
1563	261.3	0
1564	261.4	1.43
1565	261.5	13.81
1566	261.6	14.04
1567	261.7	9.81
1568	261.8	16.03
1569	261.9	27.88
1570	262	31.54
1571	262.1	19.42
1572	262.2	0
1573	263	0
1574	263.1	5.32
1575	263.2	11.67
1576	263.3	10.34
1577	263.4	2.75
1578	263.5	0
1579	264.1	0
1580	264.2	0.96
1581	264.3	3.14
1582	264.4	2.65
1583	264.5	1.41
1584	264.6	0.46
1585	264.7	0.56
1586	264.8	3.07
1587	264.9	0
1588	265.5	0
1589	265.6	8.84
1590	265.7	17.48
1591	265.8	14.88
1592	265.9	0
1593	266.6	0
1594	266.7	5.07
1595	266.8	9.11
1596	266.9	8.64
1597	267	4.38
1598	267.1	0
1599	267.6	0
1600	267.7	2.07
1601	267.8	7.9
1602	267.9	0
1603	268.3	0
1604	268.4	0.54
1605	268.5	0
1606	268.6	0
1607	268.7	1.52
1608	268.8	12.02
1609	268.9	22.42
1610	269	23.27
1611	269.1	13.54
1612	269.2	2.54
1613	269.3	0
1614	269.4	0.17
1615	269.5	4
1616	269.6	7.61
1617	269.7	8.15
1618	269.8	0
1619	270.1	0
1620	270.2	4.99
1621	270.3	16.95
1622	270.4	15.56
1623	270.5	8.3
1624	270.6	1.42
1625	270.7	3.36
1626	270.8	14.73
1627	270.9	23.63
1628	271	30.08
1629	271.1	37.23
1630	271.2	44.9
1631	271.3	48.94
1632	271.4	42.98
1633	271.5	31.77
1634	271.6	22.72
1635	271.7	11.34
1636	271.8	0.97
1637	271.9	0
1638	272.1	0
1639	272.2	3.78
1640	272.3	2.22
1641	272.4	0
1642	273.4	0
1643	273.5	11.78
1644	273.6	40.07
1645	273.7	53.96
1646	273.8	54.64
1647	273.9	56.89
1648	274	70.67
1649	274.1	85.16
1650	274.2	87.87
1651	274.3	90.87
1652	274.4	102.46
1653	274.5	95.65
1654	274.6	62
1655	274.7	26.19
1656	274.8	9.37
1657	274.9	11.58
1658	275	23.53
1659	275.1	27.17
1660	275.2	11.19
1661	275.3	0
1662	275.5	0
1663	275.6	15.44
1664	275.7	43.8
1665	275.8	51.96
1666	275.9	30.51
1667	276	0
1668	276.3	0
1669	276.4	11.63
1670	276.5	14.48
1671	276.6	13.35
1672	276.7	19.14
1673	276.8	26.77
1674	276.9	26.78
1675	277	18.6
1676	277.1	9.55
1677	277.2	3.4
1678	277.3	0
1679	277.5	0
1680	277.6	2.67
1681	277.7	3
1682	277.8	0
1683	278.4	0
1684	278.5	11.31
1685	278.6	7.15
1686	278.7	0
1687	278.8	0
1688	278.9	2.84
1689	279	41.2
1690	279.1	67.81
1691	279.2	66.17
1692	279.3	45.29
1693	279.4	24.54
1694	279.5	14.26
1695	279.6	16.23
1696	279.7	26.64
1697	279.8	37.22
1698	279.9	38.16
1699	280	26.02
1700	280.1	0
1701	280.5	0
1702	280.6	304.41
1703	280.7	772.95
1704	280.8	1122.97
1705	280.9	1185.44
1706	281	1018.16
1707	281.1	840.69
1708	281.2	762.3
1709	281.3	679.69
1710	281.4	456.14
1711	281.5	191.4
1712	281.6	59.5
1713	281.7	88.76
1714	281.8	192.02
1715	281.9	247.1
1716	282	179.43
1717	282.1	42.85
1718	282.2	0
1719	282.3	0
1720	282.4	21.65
1721	282.5	35.73
1722	282.6	3.07
1723	282.7	0
1724	283.2	0
1725	283.3	18.66
1726	283.4	3.16
1727	283.5	0
1728	284.7	0
1729	284.8	10.26
1730	284.9	9.79
1731	285	10.79
1732	285.1	16.7
1733	285.2	19.61
1734	285.3	7.97
1735	285.4	2.66
1736	285.5	25.84
1737	285.6	64.21
1738	285.7	99.12
1739	285.8	140.13
1740	285.9	231.44
1741	286	384.53
1742	286.1	527.42
1743	286.2	578.07
1744	286.3	514.92
1745	286.4	384.8
1746	286.5	239.71
1747	286.6	113.05
1748	286.7	33.74
1749	286.8	16.33
1750	286.9	26.21
1751	287	36.85
1752	287.1	39.78
1753	287.2	34.15
1754	287.3	27.01
1755	287.4	21.46
1756	287.5	16.32
1757	287.6	11.28
1758	287.7	10.33
1759	287.8	16.8
1760	287.9	26.94
1761	288	32.07
1762	288.1	30.19
1763	288.2	26.03
1764	288.3	22.44
1765	288.4	15.26
1766	288.5	5.04
1767	288.6	0
1768	288.7	0.49
1769	288.8	6.9
1770	288.9	12.82
1771	289	15.08
1772	289.1	12.57
1773	289.2	6.51
1774	289.3	0
1775	289.4	0.54
1776	289.5	12.05
1777	289.6	25.8
1778	289.7	26.09
1779	289.8	8.15
1780	289.9	0
1781	290.6	0
1782	290.7	13.87
1783	290.8	21.92
1784	290.9	17.56
1785	291	7.55
1786	291.1	0
1787	292	0
1788	292.1	13.86
1789	292.2	10.03
1790	292.3	0
1791	293.1	0
1792	293.2	5.83
1793	293.3	4.89
1794	293.4	3.23
1795	293.5	5.55
1796	293.6	11.89
1797	293.7	15.69
1798	293.8	11.3
1799	293.9	2
1800	294	0
1801	294.3	0
1802	294.4	31.38
1803	294.5	136.05
1804	294.6	270.47
1805	294.7	364.39
1806	294.8	406.35
1807	294.9	444.4
1808	295	504.41
1809	295.1	530.27
1810	295.2	466.55
1811	295.3	320.09
1812	295.4	171.31
1813	295.5	74.55
1814	295.6	43.98
1815	295.7	52.11
1816	295.8	56.04
1817	295.9	40.85
1818	296	13.48
1819	296.1	0
1820	296.8	0
1821	296.9	357.72
1822	297	768.42
1823	297.1	872.71
1824	297.2	638.57
1825	297.3	230.14
1826	297.4	0
1827	298.3	0
1828	298.4	158.95
1829	298.5	277.4
1830	298.6	328.73
1831	298.7	228.27
1832	298.8	80.85
1833	298.9	37.15
1834	299	114.76
1835	299.1	176.19
1836	299.2	125.16
1837	299.3	29.61
1838	299.4	0.7
1839	299.5	38.61
1840	299.6	67.28
1841	299.7	81.62
1842	299.8	120.37
1843	299.9	148.25
1844	300	124.7
1845	300.1	50.65
1846	300.2	0
1847	300.3	0
1848	300.4	20.9
1849	300.5	36.43
1850	300.6	21.41
1851	300.7	2.07
1852	300.8	0.44
1853	300.9	7.83
1854	301	7.95
1855	301.1	0
1856	301.2	0
1857	301.3	3.19
1858	301.4	55.51
1859	301.5	141.69
1860	301.6	297.73
1861	301.7	558.46
1862	301.8	949.78
1863	301.9	1413.49
1864	302	1818.1
1865	302.1	2071.59
1866	302.2	2151.18
1867	302.3	2032.67
1868	302.4	1669.45
1869	302.5	1101.31
1870	302.6	527.01
1871	302.7	187.69
1872	302.8	108.61
1873	302.9	186.92
1874	303	285.45
1875	303.1	357.77
1876	303.2	405.1
1877	303.3	400.07
1878	303.4	315
1879	303.5	180.5
1880	303.6	66.79
1881	303.7	10.68
1882	303.8	0
1883	303.9	0
1884	304	3.03
1885	304.1	17.75
1886	304.2	29.54
1887	304.3	30.65
1888	304.4	20.32
1889	304.5	4.27
1890	304.6	0
1891	305.5	0
1892	305.6	1.05
1893	305.7	5.9
1894	305.8	12.05
1895	305.9	13.83
1896	306	9.01
1897	306.1	2.13
1898	306.2	0
1899	306.9	0
1900	307	13.03
1901	307.1	16.66
1902	307.2	14.45
1903	307.3	9.89
1904	307.4	6.38
1905	307.5	4.96
1906	307.6	3.15
1907	307.7	0
1908	309.1	0
1909	309.2	3.87
1910	309.3	10.6
1911	309.4	7.59
1912	309.5	2.73
1913	309.6	0.65
1914	309.7	0.03
1915	309.8	0
1916	310.1	0
1917	310.2	0.6
1918	310.3	3.07
1919	310.4	8.36
1920	310.5	14.14
1921	310.6	16.19
1922	310.7	13.69
1923	310.8	10.46
1924	310.9	9.27
1925	311	8.3
1926	311.1	5.7
1927	311.2	2.31
1928	311.3	0.11
1929	311.4	0
1930	311.5	0.48
1931	311.6	1.41
1932	311.7	1.48
1933	311.8	0
1934	312.2	0
1935	312.3	10.39
1936	312.4	7.04
1937	312.5	0
1938	312.7	0
1939	312.8	14.85
1940	312.9	22.98
1941	313	20.44
1942	313.1	14.19
1943	313.2	10.22
1944	313.3	8.32
1945	313.4	5.98
1946	313.5	2.08
1947	313.6	0
1948	313.7	0
1949	313.8	3.3
1950	313.9	16.82
1951	314	27.65
1952	314.1	21.29
1953	314.2	0
1954	314.4	0
1955	314.5	0.88
1956	314.6	17.68
1957	314.7	21.25
1958	314.8	12.26
1959	314.9	0.83
1960	315	0
1961	316.7	0
1962	316.8	13.37
1963	316.9	24.56
1964	317	21.99
1965	317.1	7.52
1966	317.2	0
1967	317.4	0
1968	317.5	36.46
1969	317.6	118.81
1970	317.7	241.24
1971	317.8	412.21
1972	317.9	601.73
1973	318	767.37
1974	318.1	871.46
1975	318.2	881.45
1976	318.3	790.94
1977	318.4	611.92
1978	318.5	382.13
1979	318.6	172.75
1980	318.7	35.33
1981	318.8	0
1982	318.9	0
1983	319	9.96
1984	319.1	57.03
1985	319.2	89.77
1986	319.3	101.12
1987	319.4	88.28
1988	319.5	55.76
1989	319.6	20.35
1990	319.7	0
1991	319.8	0
1992	319.9	1.44
1993	320	8.83
1994	320.1	16.47
1995	320.2	22.62
1996	320.3	23.05
1997	320.4	16.79
[truncated: 2,197 more rows]

## Sheet: Sheet10
+ESI Scan (rt: 11.42-11.64 min, 49 scans) Frag=100.0V CF=0.000 DF=0.000 4608-02.d Subtract
Index	X	Y
0	50	0.25
1	50.1	0.28
2	50.2	0.09
3	50.3	0
4	50.4	0
5	50.5	0.03
6	50.6	0.11
7	50.7	0.11
8	50.8	0.04
9	50.9	0
10	52.1	0
11	52.2	0.14
12	52.3	0.19
13	52.4	0.08
14	52.5	0
15	53.2	0
16	53.3	0.21
17	53.4	0.32
18	53.5	0
19	53.6	0
20	53.7	0.04
21	53.8	0.16
22	53.9	0.08
23	54	0.09
24	54.1	0.43
25	54.2	0.97
26	54.3	1.45
27	54.4	0.11
28	54.5	0
29	54.9	0
30	55	40.21
31	55.1	102.36
32	55.2	101.86
33	55.3	30.68
34	55.4	0
35	55.7	0
36	55.8	9.92
37	55.9	14.7
38	56	16.88
39	56.1	17.37
40	56.2	14.02
41	56.3	5.23
42	56.4	0
43	56.5	7.82
44	56.6	28.96
45	56.7	59.98
46	56.8	68.58
47	56.9	23.48
48	57	0
49	57.2	0
50	57.3	145.79
51	57.4	211.42
52	57.5	125.07
53	57.6	0
54	59.8	0
55	59.9	171.18
56	60	288.77
57	60.1	229.83
58	60.2	108.16
59	60.3	0
60	60.6	0
61	60.7	56.78
62	60.8	175.29
63	60.9	131.43
64	61	0
65	61.5	0
66	61.6	10.28
67	61.7	38.63
68	61.8	12.48
69	61.9	22
70	62	6.17
71	62.1	12.06
72	62.2	1.52
73	62.3	0
74	62.6	0
75	62.7	1.97
76	62.8	9.17
77	62.9	2.78
78	63	2.89
79	63.1	8.08
80	63.2	16.63
81	63.3	22.49
82	63.4	21.94
83	63.5	16.73
84	63.6	9.98
85	63.7	1.01
86	63.8	0
87	64.2	0
88	64.3	11.61
89	64.4	11.08
90	64.5	6.41
91	64.6	1.01
92	64.7	0
93	65.4	0
94	65.5	0.22
95	65.6	0.25
96	65.7	0.05
97	65.8	0
98	65.9	0
99	66	0.04
100	66.1	0
101	66.4	0
102	66.5	2.02
103	66.6	4.86
104	66.7	6.78
105	66.8	6.62
106	66.9	4.88
107	67	2.64
108	67.1	0
109	67.5	0
110	67.6	0.09
111	67.7	0.95
112	67.8	1.14
113	67.9	1.19
114	68	0.58
115	68.1	0
116	68.2	1.19
117	68.3	5.05
118	68.4	4.83
119	68.5	0
120	68.9	0
121	69	16.38
122	69.1	0
123	69.4	0
124	69.5	37.62
125	69.6	29.18
126	69.7	0
127	70.2	0
128	70.3	12.72
129	70.4	10.03
130	70.5	0
131	71.6	0
132	71.7	2.5
133	71.8	0
134	72.7	0
135	72.8	22.94
136	72.9	195.52
137	73	286.12
138	73.1	88.78
139	73.2	0
140	73.6	0
141	73.7	155.83
142	73.8	75.09
143	73.9	31.13
144	74	0
145	74.4	0
146	74.5	1.59
147	74.6	79.56
148	74.7	45.88
149	74.8	0
150	75	0
151	75.1	77.43
152	75.2	115.99
153	75.3	48.73
154	75.4	0
155	75.7	0
156	75.8	2.17
157	75.9	5.14
158	76	6.05
159	76.1	3.4
160	76.2	0
161	76.5	0
162	76.6	25.43
163	76.7	83.3
164	76.8	175.57
165	76.9	232.66
166	77	173.82
167	77.1	26.38
168	77.2	0
169	77.7	0
170	77.8	25.25
171	77.9	99.88
172	78	125.04
173	78.1	64.99
174	78.2	0
175	78.8	0
176	78.9	48
177	79	94.08
178	79.1	69.17
179	79.2	6.62
180	79.3	0
181	79.6	0
182	79.7	25.22
183	79.8	59.78
184	79.9	81.4
185	80	84.08
186	80.1	78.55
187	80.2	71.26
188	80.3	62.6
189	80.4	42.76
190	80.5	7.31
191	80.6	0
192	81	0
193	81.1	101.53
194	81.2	276.01
195	81.3	404.06
196	81.4	390.69
197	81.5	249.02
198	81.6	92.25
199	81.7	43.36
200	81.8	42.09
201	81.9	54.9
202	82	39.3
203	82.1	5.57
204	82.2	0
205	82.3	12.69
206	82.4	24.84
207	82.5	2.46
208	82.6	0
209	83.2	0
210	83.3	7.33
211	83.4	14.8
212	83.5	28.74
213	83.6	20.18
214	83.7	0
215	83.8	2.54
216	83.9	69.1
217	84	113.28
218	84.1	80
219	84.2	29.89
220	84.3	45.76
221	84.4	107.85
222	84.5	134.54
223	84.6	122.84
224	84.7	124.12
225	84.8	196.83
226	84.9	314.78
227	85	414.98
228	85.1	450.5
229	85.2	417.84
230	85.3	344.22
231	85.4	236.74
232	85.5	120.86
233	85.6	28.41
234	85.7	0
235	85.8	0.75
236	85.9	6.28
237	86	7.78
238	86.1	5.47
239	86.2	0
240	86.4	0
241	86.5	22.65
242	86.6	57.41
243	86.7	45.71
244	86.8	3.03
245	86.9	0
246	87.3	0
247	87.4	33.45
248	87.5	81.05
249	87.6	37.8
250	87.7	0
251	88.2	0
252	88.3	37.91
253	88.4	208.71
254	88.5	291.89
255	88.6	89.46
256	88.7	0
257	89.1	0
258	89.2	181.17
259	89.3	795.5
260	89.4	643.86
261	89.5	120.31
262	89.6	0
263	90.3	0
264	90.4	49.46
265	90.5	129.09
266	90.6	116.8
267	90.7	73.69
268	90.8	53.92
269	90.9	79.97
270	91	100.63
271	91.1	85.94
272	91.2	35.45
273	91.3	0
274	91.6	0
275	91.7	1.69
276	91.8	0
277	91.9	0
278	92	1.67
279	92.1	12.82
280	92.2	18.95
281	92.3	11.25
282	92.4	0
283	92.6	0
284	92.7	10.63
285	92.8	43.14
286	92.9	61.5
287	93	52.36
288	93.1	23.45
289	93.2	0
290	94.5	0
291	94.6	1.59
292	94.7	0
293	95.5	0
294	95.6	2.75
295	95.7	0
296	96.8	0
297	96.9	59.34
298	97	168.57
299	97.1	217.94
300	97.2	189.46
301	97.3	95.16
302	97.4	0
303	97.7	0
304	97.8	49.86
305	97.9	56.25
306	98	37.03
307	98.1	18.78
308	98.2	0
309	98.3	0
310	98.4	15.56
311	98.5	180.18
312	98.6	367.8
313	98.7	428.49
314	98.8	365.89
315	98.9	242.18
316	99	95.79
317	99.1	42.04
318	99.2	238.33
319	99.3	617.1
320	99.4	857.1
321	99.5	740.58
322	99.6	380.04
323	99.7	103.31
324	99.8	14.3
325	99.9	0
326	100.4	0
327	100.5	66.43
328	100.6	227.8
329	100.7	327.05
330	100.8	378.46
331	100.9	458.85
332	101	517.79
333	101.1	396.38
334	101.2	73.63
335	101.3	0
336	103.7	0
337	103.8	2.86
338	103.9	87.22
339	104	132.12
340	104.1	110.41
341	104.2	57.5
342	104.3	26.95
343	104.4	28.53
344	104.5	25.74
345	104.6	49.51
346	104.7	133.43
347	104.8	218.34
348	104.9	245.3
349	105	230.37
350	105.1	243.61
351	105.2	295.91
352	105.3	305.07
353	105.4	218.55
354	105.5	81.15
355	105.6	0
356	105.9	0
357	106	50.24
358	106.1	35.15
359	106.2	0
360	106.5	0
361	106.6	1.18
362	106.7	182.06
363	106.8	404.49
364	106.9	491.98
365	107	388.31
366	107.1	270.38
367	107.2	294.79
368	107.3	352.91
369	107.4	252.47
370	107.5	22.03
371	107.6	0
372	107.8	0
373	107.9	62.8
374	108	145.91
375	108.1	176.44
376	108.2	129.13
377	108.3	36.05
378	108.4	0
379	108.6	0
380	108.7	57.6
381	108.8	166.93
382	108.9	270.67
383	109	299.97
384	109.1	251.23
385	109.2	197.14
386	109.3	178.04
387	109.4	152.33
388	109.5	88.4
389	109.6	30.84
390	109.7	23.32
391	109.8	38.84
392	109.9	59.97
393	110	79.08
394	110.1	88.66
395	110.2	67.72
396	110.3	7.97
397	110.4	0
398	110.6	0
399	110.7	45.2
400	110.8	50.15
401	110.9	0
402	111.2	0
403	111.3	6.65
404	111.4	66.55
405	111.5	72.39
406	111.6	29.31
407	111.7	0
408	111.8	0
409	111.9	11.06
410	112	41.13
411	112.1	41.07
412	112.2	12.87
413	112.3	0
414	112.6	0
415	112.7	22.14
416	112.8	47.23
417	112.9	52.5
418	113	100.52
419	113.1	200.47
420	113.2	257.19
421	113.3	207.19
422	113.4	120.66
423	113.5	101.36
424	113.6	134.6
425	113.7	141.02
426	113.8	89.07
427	113.9	0
428	114.4	0
429	114.5	5.43
430	114.6	9.39
431	114.7	0
432	114.8	0
433	114.9	35.21
434	115	654.37
435	115.1	1116.78
436	115.2	964.14
437	115.3	318.66
438	115.4	0
439	116.4	0
440	116.5	34.69
441	116.6	59.41
442	116.7	13.36
443	116.8	0
444	117	0
445	117.1	95.95
446	117.2	210.6
447	117.3	227.77
448	117.4	166.28
449	117.5	89.72
450	117.6	30.58
451	117.7	20.02
452	117.8	38.45
453	117.9	42.12
454	118	17.72
455	118.1	0
456	118.3	0
457	118.4	29.81
458	118.5	229.09
459	118.6	546.33
460	118.7	976.28
461	118.8	1451.58
462	118.9	1796.1
463	119	1870.6
464	119.1	1722.67
465	119.2	1496.44
466	119.3	1231.64
467	119.4	871.56
468	119.5	440.99
469	119.6	116.19
470	119.7	0
471	119.8	10.5
472	119.9	104.21
473	120	180.83
474	120.1	182.4
475	120.2	119.38
476	120.3	46.03
477	120.4	51.34
478	120.5	208.31
479	120.6	383.83
480	120.7	443.05
481	120.8	372.76
482	120.9	265.98
483	121	230.99
484	121.1	315.2
485	121.2	435.52
486	121.3	418.01
487	121.4	215.67
488	121.5	9.97
489	121.6	0
490	121.7	61.74
491	121.8	61.52
492	121.9	0
493	122.6	0
494	122.7	33.74
495	122.8	72.88
496	122.9	108.27
497	123	131.31
498	123.1	142.39
499	123.2	146.48
500	123.3	150.37
501	123.4	157.14
502	123.5	164.26
503	123.6	183.7
504	123.7	219.56
505	123.8	221.11
506	123.9	150.82
507	124	51.85
508	124.1	16.78
509	124.2	53.61
510	124.3	96.43
511	124.4	94.92
512	124.5	85.03
513	124.6	87.89
514	124.7	70.53
515	124.8	8.41
516	124.9	0
517	125.5	0
518	125.6	19.98
519	125.7	58.17
520	125.8	62.18
521	125.9	42.24
522	126	10.72
523	126.1	0
524	126.4	0
525	126.5	32.51
526	126.6	38.93
527	126.7	4.02
528	126.8	0
529	126.9	0
530	127	4.79
531	127.1	59.56
532	127.2	83.68
533	127.3	79.43
534	127.4	65.22
535	127.5	56.19
536	127.6	33.37
537	127.7	7.78
538	127.8	0
539	127.9	0
540	128	3.35
541	128.1	37.93
542	128.2	59.64
543	128.3	71.84
544	128.4	56.32
545	128.5	45.08
546	128.6	28.27
547	128.7	7.75
548	128.8	0
549	129	0
550	129.1	39.47
551	129.2	126.72
552	129.3	177.39
553	129.4	157.4
554	129.5	86.25
555	129.6	30.31
556	129.7	6.4
557	129.8	3.12
558	129.9	0
559	130.2	0
560	130.3	47.12
561	130.4	158.41
562	130.5	293.02
563	130.6	370.96
564	130.7	383.68
565	130.8	355.59
566	130.9	361.78
567	131	463.51
568	131.1	637.53
569	131.2	753.61
570	131.3	681.64
571	131.4	447.62
572	131.5	217
573	131.6	136.09
574	131.7	136.87
575	131.8	128.85
576	131.9	86.62
577	132	28.1
578	132.1	0
579	132.4	0
580	132.5	52.42
581	132.6	136.2
582	132.7	236.66
583	132.8	355.82
584	132.9	465.99
585	133	540.7
586	133.1	567.21
587	133.2	535.42
588	133.3	439.59
589	133.4	297.97
590	133.5	149.25
591	133.6	14.98
592	133.7	0
593	133.8	0
594	133.9	86.17
595	134	175.89
596	134.1	198.83
597	134.2	169.27
598	134.3	163.99
599	134.4	226.39
600	134.5	351.89
601	134.6	468.03
602	134.7	520.75
603	134.8	520.63
604	134.9	534.22
605	135	600.8
606	135.1	687.67
607	135.2	709.58
608	135.3	597.09
609	135.4	388.66
610	135.5	182
611	135.6	20.52
612	135.7	0
613	135.9	0
614	136	22.45
615	136.1	2.57
616	136.2	0
617	136.3	0
618	136.4	36.52
619	136.5	174.31
620	136.6	250.51
621	136.7	243.15
622	136.8	220.62
623	136.9	209.95
624	137	166.32
625	137.1	115.15
626	137.2	150.21
627	137.3	244.79
628	137.4	250.07
629	137.5	125.92
630	137.6	0
631	138.4	0
632	138.5	4.84
633	138.6	0
634	139	0
635	139.1	23.58
636	139.2	117.52
637	139.3	152.24
638	139.4	121.13
639	139.5	49.3
640	139.6	0
641	139.9	0
642	140	11.11
643	140.1	17.28
644	140.2	0
645	140.3	0
646	140.4	2.52
647	140.5	41.53
648	140.6	51.78
649	140.7	41.13
650	140.8	42.12
651	140.9	57.88
652	141	47.12
653	141.1	0
654	141.3	0
655	141.4	19.52
656	141.5	114.91
657	141.6	185.96
658	141.7	226.45
659	141.8	251.78
660	141.9	277.32
661	142	297.85
662	142.1	289.96
663	142.2	230.09
664	142.3	127.77
665	142.4	55.63
666	142.5	43.59
667	142.6	72.15
668	142.7	84.9
669	142.8	44.99
670	142.9	0
671	143.1	0
672	143.2	68.55
673	143.3	119.61
674	143.4	85.76
675	143.5	29.65
676	143.6	22.24
677	143.7	41.89
678	143.8	38.12
679	143.9	13.56
680	144	10.48
681	144.1	49.07
682	144.2	96.87
683	144.3	84.85
684	144.4	0
685	144.5	0
686	144.6	8.92
687	144.7	204.55
688	144.8	439.22
689	144.9	676.02
690	145	864.19
691	145.1	885.3
692	145.2	691.82
693	145.3	421.71
694	145.4	250.36
695	145.5	191.35
696	145.6	151.42
697	145.7	79.62
698	145.8	88.52
699	145.9	78.65
700	146	68.61
701	146.1	100.98
702	146.2	147.04
703	146.3	142.65
704	146.4	94.15
705	146.5	84.78
706	146.6	181.83
707	146.7	351.5
708	146.8	537.77
709	146.9	686.28
710	147	749.96
711	147.1	707.43
712	147.2	602.7
713	147.3	484.26
714	147.4	360.89
715	147.5	218.94
716	147.6	96.76
717	147.7	33.05
718	147.8	23.82
719	147.9	32.57
720	148	39.07
721	148.1	45.82
722	148.2	70.26
723	148.3	153.15
724	148.4	364.57
725	148.5	794.27
726	148.6	1404.47
727	148.7	2114.12
728	148.8	2848.26
729	148.9	3485.31
730	149	3850.15
731	149.1	3824.63
732	149.2	3407.88
733	149.3	2664.48
734	149.4	1726.93
735	149.5	863.89
736	149.6	340.06
737	149.7	250.58
738	149.8	433.06
739	149.9	632.49
740	150	647.81
741	150.1	495.13
742	150.2	311.61
743	150.3	194.69
744	150.4	132.84
745	150.5	113.47
746	150.6	150.76
747	150.7	250.23
748	150.8	402.61
749	150.9	533.95
750	151	544.91
751	151.1	426.54
752	151.2	275.48
753	151.3	182.93
754	151.4	125.48
755	151.5	58.98
756	151.6	14.64
757	151.7	26.29
758	151.8	65.38
759	151.9	88.69
760	152	87.2
761	152.1	68.49
762	152.2	39.56
763	152.3	38.87
764	152.4	0
765	152.7	0
766	152.8	26.78
767	152.9	36.85
768	153	0
769	153.4	0
770	153.5	179.27
771	153.6	200.21
772	153.7	112.43
773	153.8	67.43
774	153.9	28.05
775	154	0
776	155.1	0
777	155.2	33.88
778	155.3	23.57
779	155.4	0
780	155.6	0
781	155.7	46.68
782	155.8	94.74
783	155.9	108.74
784	156	79.19
785	156.1	29.45
786	156.2	0
787	156.3	27.59
788	156.4	106.09
789	156.5	183.63
790	156.6	215.97
791	156.7	201.07
792	156.8	151.69
793	156.9	115
794	157	150.92
795	157.1	262.72
796	157.2	354.57
797	157.3	305.53
798	157.4	149.08
799	157.5	25.18
800	157.6	12.32
801	157.7	55.59
802	157.8	82.8
803	157.9	68.28
804	158	36.66
805	158.1	6.91
806	158.2	0
807	158.3	16.88
808	158.4	151.56
809	158.5	385.51
810	158.6	631.61
811	158.7	826.91
812	158.8	996.23
813	158.9	1160.65
814	159	1252.22
815	159.1	1195.27
816	159.2	994.92
817	159.3	733.31
818	159.4	494.39
819	159.5	322.59
820	159.6	261.18
821	159.7	264.21
822	159.8	251.47
823	159.9	197.44
824	160	148.79
825	160.1	154.6
826	160.2	164.2
827	160.3	153.33
828	160.4	156.43
829	160.5	333.48
830	160.6	840.53
831	160.7	1619.24
832	160.8	2391.99
833	160.9	2847.3
834	161	2925.64
835	161.1	2834.25
836	161.2	2711.11
837	161.3	2402.26
838	161.4	1742.11
839	161.5	911.13
840	161.6	301.55
841	161.7	165.36
842	161.8	231.74
843	161.9	327.77
844	162	321.36
845	162.1	249.07
846	162.2	192.89
847	162.3	163.52
848	162.4	119.65
849	162.5	75.57
850	162.6	96.67
851	162.7	204.74
852	162.8	328.71
853	162.9	379.18
854	163	342.7
855	163.1	271.96
856	163.2	208.82
857	163.3	148.22
858	163.4	79.4
859	163.5	12.44
860	163.6	0
861	163.7	0
862	163.8	4.79
863	163.9	30.29
864	164	45.45
865	164.1	45.38
866	164.2	29.77
867	164.3	10.18
868	164.4	5.77
869	164.5	29.67
870	164.6	58.61
871	164.7	89.31
872	164.8	120.64
873	164.9	143.97
874	165	139.29
875	165.1	98.21
876	165.2	43.54
877	165.3	10.83
878	165.4	0
879	165.5	0
880	165.6	4.47
881	165.7	7.02
882	165.8	1.8
883	165.9	0
884	166.7	0
885	166.8	16.84
886	166.9	54.85
887	167	31.15
888	167.1	0
889	167.4	0
890	167.5	0.37
891	167.6	0
892	168.6	0
893	168.7	16.41
894	168.8	55.55
895	168.9	79.13
896	169	66.25
897	169.1	33.31
898	169.2	11.21
899	169.3	7.43
900	169.4	5.33
901	169.5	0
902	169.6	0
903	169.7	2.75
904	169.8	22.75
905	169.9	38.54
906	170	38.72
907	170.1	27.37
908	170.2	30.64
909	170.3	66.56
910	170.4	113.84
911	170.5	162.96
912	170.6	229.81
913	170.7	334.16
914	170.8	436.4
915	170.9	516
916	171	583.93
917	171.1	631.71
918	171.2	596.4
919	171.3	433.4
920	171.4	203.38
921	171.5	50.38
922	171.6	20.48
923	171.7	46.53
924	171.8	76.21
925	171.9	66.88
926	172	28.65
927	172.1	0
928	172.4	0
929	172.5	36.4
930	172.6	133.96
931	172.7	282.42
932	172.8	411.65
933	172.9	453.73
934	173	411.99
935	173.1	345.82
936	173.2	288.03
937	173.3	223.27
938	173.4	134.66
939	173.5	58.35
940	173.6	12.57
941	173.7	8.07
942	173.8	24.66
943	173.9	45.21
944	174	48.07
945	174.1	25
946	174.2	4.23
947	174.3	39.7
948	174.4	205.96
949	174.5	447.3
950	174.6	651.24
951	174.7	822.25
952	174.8	1049.19
953	174.9	1320.45
954	175	1483.33
955	175.1	1444.72
956	175.2	1259.28
957	175.3	987.99
958	175.4	642.87
959	175.5	301.11
960	175.6	103.64
961	175.7	84.12
962	175.8	132.75
963	175.9	155.79
964	176	122.64
965	176.1	59.57
966	176.2	9.86
967	176.3	0
968	176.4	13.59
969	176.5	41.23
970	176.6	55.92
971	176.7	63.39
972	176.8	93.17
973	176.9	134.44
974	177	160.69
975	177.1	152.33
976	177.2	128.37
977	177.3	104.04
978	177.4	77.5
979	177.5	47.01
980	177.6	17.88
981	177.7	9.84
982	177.8	28.19
983	177.9	50.88
984	178	48.21
985	178.1	24.39
986	178.2	3.98
987	178.3	0
988	178.6	0
989	178.7	34.29
990	178.8	50.99
991	178.9	33.2
992	179	0.94
993	179.1	0
994	179.2	0
995	179.3	8.58
996	179.4	13.53
997	179.5	4.93
998	179.6	0
999	180	0
1000	180.1	20.41
1001	180.2	36.87
1002	180.3	27.37
1003	180.4	1.79
1004	180.5	0
1005	180.8	0
1006	180.9	15.13
1007	181	40.83
1008	181.1	20.28
1009	181.2	0
1010	181.8	0
1011	181.9	23.68
1012	182	56.7
1013	182.1	65.84
1014	182.2	49.68
1015	182.3	28.69
1016	182.4	26.67
1017	182.5	47.21
1018	182.6	90.56
1019	182.7	139.89
1020	182.8	160.93
1021	182.9	134.91
1022	183	89.76
1023	183.1	67.81
1024	183.2	70.39
1025	183.3	54.17
1026	183.4	12.13
1027	183.5	0
1028	183.6	0
1029	183.7	20.94
1030	183.8	47.03
1031	183.9	46.46
1032	184	30.8
1033	184.1	22.61
1034	184.2	22
1035	184.3	23.14
1036	184.4	32.22
1037	184.5	89.88
1038	184.6	190.26
1039	184.7	284.98
1040	184.8	324.66
1041	184.9	321.73
1042	185	337.38
1043	185.1	383.76
1044	185.2	406.44
1045	185.3	351.62
1046	185.4	233.53
1047	185.5	117.02
1048	185.6	51.27
1049	185.7	28.76
1050	185.8	32.04
1051	185.9	39.58
1052	186	36.64
1053	186.1	23.25
1054	186.2	12.24
1055	186.3	19.79
1056	186.4	44.03
1057	186.5	79.5
1058	186.6	113.01
1059	186.7	128.64
1060	186.8	119.04
1061	186.9	100.59
1062	187	123.24
1063	187.1	211.81
1064	187.2	294.2
1065	187.3	276.36
1066	187.4	145.18
1067	187.5	7.8
1068	187.6	0
1069	187.7	0
1070	187.8	34.73
1071	187.9	57.86
1072	188	51.1
1073	188.1	32.15
1074	188.2	24.92
1075	188.3	44.02
1076	188.4	125.96
1077	188.5	320.74
1078	188.6	581.42
1079	188.7	812.41
1080	188.8	960.87
1081	188.9	1020.53
1082	189	1003.21
1083	189.1	935.97
1084	189.2	837.29
1085	189.3	675.1
1086	189.4	433.26
1087	189.5	180.68
1088	189.6	35.67
1089	189.7	20.98
1090	189.8	60.26
1091	189.9	94.95
1092	190	92.83
1093	190.1	64.27
1094	190.2	41.45
1095	190.3	41.71
1096	190.4	51.32
1097	190.5	44.09
1098	190.6	19.97
1099	190.7	6.14
1100	190.8	16.87
1101	190.9	37.57
1102	191	50.62
1103	191.1	59.34
1104	191.2	68.68
1105	191.3	60.98
1106	191.4	40.39
1107	191.5	12.26
1108	191.6	2.43
1109	191.7	2.72
1110	191.8	0
1111	192.3	0
1112	192.4	9.82
1113	192.5	0
1114	192.8	0
1115	192.9	11.43
1116	193	28.76
1117	193.1	30.26
1118	193.2	21.04
1119	193.3	0.59
1120	193.4	0
1121	193.5	0
1122	193.6	8.44
1123	193.7	27.68
1124	193.8	35.24
1125	193.9	30.09
1126	194	11
1127	194.1	0
1128	194.2	0.03
1129	194.3	33.37
1130	194.4	64.35
1131	194.5	78.19
1132	194.6	63.16
1133	194.7	22.5
1134	194.8	0
1135	194.9	0
1136	195	13.05
1137	195.1	26.09
1138	195.2	0
1139	196.2	0
1140	196.3	16.49
1141	196.4	87.16
1142	196.5	184.04
1143	196.6	269.72
1144	196.7	359.21
1145	196.8	487.71
1146	196.9	619.16
1147	197	674.23
1148	197.1	644.75
1149	197.2	595.23
1150	197.3	545.96
1151	197.4	428.38
1152	197.5	242.49
1153	197.6	95.33
1154	197.7	72.62
1155	197.8	102.87
1156	197.9	143.45
1157	198	150.87
1158	198.1	111.84
1159	198.2	60.95
1160	198.3	34.05
1161	198.4	41.89
1162	198.5	65.49
1163	198.6	120.48
1164	198.7	201.33
1165	198.8	277.35
1166	198.9	320.86
1167	199	337.16
1168	199.1	362.71
1169	199.2	384.92
1170	199.3	353.38
1171	199.4	246.9
1172	199.5	112.27
1173	199.6	13.92
1174	199.7	0
1175	199.9	0
1176	200	41.8
1177	200.1	74.62
1178	200.2	82.44
1179	200.3	61.6
1180	200.4	24.36
1181	200.5	0
1182	200.8	0
1183	200.9	42.31
1184	201	203.55
1185	201.1	261.15
1186	201.2	193.88
1187	201.3	93.66
1188	201.4	45.15
1189	201.5	34.87
1190	201.6	25.28
1191	201.7	14.25
1192	201.8	6.22
1193	201.9	9.24
1194	202	26.04
1195	202.1	48.81
1196	202.2	62.62
1197	202.3	65.6
1198	202.4	64.97
1199	202.5	61.8
1200	202.6	52.81
1201	202.7	49.82
1202	202.8	72.23
1203	202.9	109.25
1204	203	134.19
1205	203.1	141.99
1206	203.2	142.43
1207	203.3	135.79
1208	203.4	118.25
1209	203.5	106.7
1210	203.6	111.78
1211	203.7	114.34
1212	203.8	94.77
1213	203.9	66.32
1214	204	53.05
1215	204.1	48.92
1216	204.2	36.8
1217	204.3	14.19
1218	204.4	0
1219	204.5	0
1220	204.6	9.81
1221	204.7	41.23
1222	204.8	62.44
1223	204.9	46.91
1224	205	11.57
1225	205.1	7.6
1226	205.2	51.67
1227	205.3	90.8
1228	205.4	81.09
1229	205.5	34.77
1230	205.6	1.35
1231	205.7	0
1232	205.9	0
1233	206	2.64
1234	206.1	6.1
1235	206.2	0
1236	206.5	0
1237	206.6	3.7
1238	206.7	34.87
1239	206.8	39.41
1240	206.9	16.58
1241	207	0
1242	207.2	0
1243	207.3	43.02
1244	207.4	74.96
1245	207.5	37.17
1246	207.6	0
1247	207.7	9.82
1248	207.8	48.13
1249	207.9	80.18
1250	208	76.16
1251	208.1	36.01
1252	208.2	0
1253	208.3	0
1254	208.4	19.18
1255	208.5	66.44
1256	208.6	68.77
1257	208.7	29.65
1258	208.8	0
1259	209.6	0
1260	209.7	12.26
1261	209.8	8.74
1262	209.9	0
1263	210.2	0
1264	210.3	2.37
1265	210.4	26.95
1266	210.5	65.82
1267	210.6	142.26
1268	210.7	245.6
1269	210.8	328.35
1270	210.9	338.38
1271	211	268.08
1272	211.1	172.66
1273	211.2	112.96
1274	211.3	95.59
1275	211.4	87.99
1276	211.5	67.01
1277	211.6	48.38
1278	211.7	34.15
1279	211.8	12.64
1280	211.9	0
1281	212.1	0
1282	212.2	4.08
1283	212.3	14.8
1284	212.4	24.53
1285	212.5	38.49
1286	212.6	47.69
1287	212.7	33.87
1288	212.8	12.26
1289	212.9	13.91
1290	213	45.32
1291	213.1	76.1
1292	213.2	78.73
1293	213.3	57.09
1294	213.4	29.24
1295	213.5	8.59
1296	213.6	0
1297	214.4	0
1298	214.5	32.14
1299	214.6	81.5
1300	214.7	133.9
1301	214.8	170.8
1302	214.9	185.72
1303	215	183.09
1304	215.1	168.83
1305	215.2	145.08
1306	215.3	113.46
1307	215.4	75.68
1308	215.5	33.42
1309	215.6	1.35
1310	215.7	0
1311	215.8	6.92
1312	215.9	21.11
1313	216	20.55
1314	216.1	7.67
1315	216.2	0.22
1316	216.3	9.84
1317	216.4	31.44
1318	216.5	51.26
1319	216.6	61.73
1320	216.7	89.41
1321	216.8	170.11
1322	216.9	305.98
1323	217	438.23
1324	217.1	494.11
1325	217.2	450.9
1326	217.3	348.64
1327	217.4	220.57
1328	217.5	93.77
1329	217.6	0
1330	218.1	0
1331	218.2	1.19
1332	218.3	10.34
1333	218.4	0
1334	218.8	0
1335	218.9	60.22
1336	219	141.36
1337	219.1	208.27
1338	219.2	219.46
1339	219.3	163.17
1340	219.4	76.14
1341	219.5	15.84
1342	219.6	0
1343	220.2	0
1344	220.3	14.81
1345	220.4	39.29
1346	220.5	52.34
1347	220.6	15.58
1348	220.7	0
1349	221.5	0
1350	221.6	13.84
1351	221.7	20.31
1352	221.8	8.28
1353	221.9	0
1354	222.3	0
1355	222.4	176.94
1356	222.5	452.18
1357	222.6	515.55
1358	222.7	441.56
1359	222.8	423.37
1360	222.9	447.18
1361	223	358.3
1362	223.1	162.75
1363	223.2	13.78
1364	223.3	0
1365	224.2	0
1366	224.3	45.72
1367	224.4	177.45
1368	224.5	276.9
1369	224.6	302.64
1370	224.7	228.19
1371	224.8	77.22
1372	224.9	0
1373	225	20.82
1374	225.1	209.6
1375	225.2	328.96
1376	225.3	260.52
1377	225.4	93.35
1378	225.5	0
1379	227	0
1380	227.1	38.93
1381	227.2	106.36
1382	227.3	185.9
1383	227.4	242.62
1384	227.5	256.77
1385	227.6	256.14
1386	227.7	247.82
1387	227.8	197.16
1388	227.9	104.12
1389	228	32.82
1390	228.1	20.48
1391	228.2	41.94
1392	228.3	55.93
1393	228.4	43.06
1394	228.5	14.8
1395	228.6	0
1396	228.7	7.85
1397	228.8	62.74
1398	228.9	123.58
1399	229	156.84
1400	229.1	153.32
1401	229.2	121.72
1402	229.3	71.64
1403	229.4	23.92
1404	229.5	5.66
1405	229.6	11.77
1406	229.7	16.18
1407	229.8	13.16
1408	229.9	12.82
1409	230	18.78
1410	230.1	28.46
1411	230.2	32.59
1412	230.3	24.64
1413	230.4	25.19
1414	230.5	34.27
1415	230.6	42.39
1416	230.7	32.24
1417	230.8	17.41
1418	230.9	14.85
1419	231	20.19
1420	231.1	11.33
1421	231.2	0
1422	231.4	0
1423	231.5	4.83
1424	231.6	0.45
1425	231.7	0
1426	232.3	0
1427	232.4	10.4
1428	232.5	26.15
1429	232.6	63.62
1430	232.7	116.97
1431	232.8	151.2
1432	232.9	140.72
1433	233	110.12
1434	233.1	93.65
1435	233.2	96.5
1436	233.3	92.69
1437	233.4	65.42
1438	233.5	23.35
1439	233.6	0
1440	233.7	0
1441	233.8	3.01
1442	233.9	18.4
1443	234	22.58
1444	234.1	13
1445	234.2	0
1446	234.7	0
1447	234.8	7.82
1448	234.9	7.8
1449	235	0
1450	235.3	0
1451	235.4	57.27
1452	235.5	86.63
1453	235.6	90.69
1454	235.7	117.22
1455	235.8	210.18
1456	235.9	322.48
1457	236	397.58
1458	236.1	421.38
1459	236.2	387.76
1460	236.3	297.56
1461	236.4	162.77
1462	236.5	58.48
1463	236.6	31.4
1464	236.7	27.05
1465	236.8	0
1466	237.1	0
1467	237.2	2.19
1468	237.3	36.86
1469	237.4	41.43
1470	237.5	31.39
1471	237.6	23.45
1472	237.7	13.76
1473	237.8	0
1474	238.1	0
1475	238.2	4.86
1476	238.3	6.03
1477	238.4	0
1478	238.5	1.28
1479	238.6	28.68
1480	238.7	82.6
1481	238.8	148.11
1482	238.9	198.74
1483	239	209.4
1484	239.1	173.43
1485	239.2	113.36
1486	239.3	67.25
1487	239.4	62.17
1488	239.5	99.21
1489	239.6	136.34
1490	239.7	135.98
1491	239.8	111.72
1492	239.9	108.21
1493	240	130.17
1494	240.1	140.98
1495	240.2	122.41
1496	240.3	88.52
1497	240.4	61.49
1498	240.5	50.69
1499	240.6	76.14
1500	240.7	140.7
1501	240.8	206.32
1502	240.9	252.46
1503	241	260.62
1504	241.1	224.51
1505	241.2	160.77
1506	241.3	95.93
1507	241.4	61.03
1508	241.5	59.81
1509	241.6	53.72
1510	241.7	49.94
1511	241.8	51.01
1512	241.9	64.92
1513	242	68.5
1514	242.1	51.44
1515	242.2	33.04
1516	242.3	38.43
1517	242.4	61.96
1518	242.5	72.67
1519	242.6	56.37
1520	242.7	31.08
1521	242.8	5.82
1522	242.9	0
1523	243.4	0
1524	243.5	7.65
1525	243.6	11.43
1526	243.7	1.92
1527	243.8	0
1528	244	0
1529	244.1	13.78
1530	244.2	23.79
1531	244.3	21.59
1532	244.4	14.09
1533	244.5	9.45
1534	244.6	7.12
1535	244.7	19.76
1536	244.8	45.26
1537	244.9	68.4
1538	245	77.33
1539	245.1	71.42
1540	245.2	54.47
1541	245.3	31.16
1542	245.4	12.34
1543	245.5	5.84
1544	245.6	7.2
1545	245.7	3.91
1546	245.8	0
1547	246.2	0
1548	246.3	1.65
1549	246.4	3.27
1550	246.5	4.9
1551	246.6	13.86
1552	246.7	28.44
1553	246.8	43.3
1554	246.9	51.92
1555	247	50.79
1556	247.1	44.74
1557	247.2	46.59
1558	247.3	76.6
1559	247.4	117.74
1560	247.5	135.78
1561	247.6	132.08
1562	247.7	132.78
1563	247.8	139.61
1564	247.9	139.57
1565	248	129.94
1566	248.1	127.91
1567	248.2	126.48
1568	248.3	108.99
1569	248.4	74.32
1570	248.5	44.7
1571	248.6	58.59
1572	248.7	92.53
1573	248.8	100.39
1574	248.9	65.24
1575	249	23.58
1576	249.1	13.73
1577	249.2	26.88
1578	249.3	33.97
1579	249.4	27.5
1580	249.5	19.08
1581	249.6	10.73
1582	249.7	0
1583	249.8	0
1584	249.9	6.6
1585	250	20.28
1586	250.1	19.1
1587	250.2	6.92
1588	250.3	9
1589	250.4	40.31
1590	250.5	79.39
1591	250.6	96.3
1592	250.7	95.15
1593	250.8	108.58
1594	250.9	143.78
1595	251	170.12
1596	251.1	163.76
1597	251.2	134.02
1598	251.3	103.6
1599	251.4	71.67
1600	251.5	34
1601	251.6	6.65
1602	251.7	0.32
1603	251.8	22.33
1604	251.9	51.25
1605	252	63.65
1606	252.1	49.87
1607	252.2	26.38
1608	252.3	13.84
1609	252.4	27.66
1610	252.5	58.94
1611	252.6	88.41
1612	252.7	102.07
1613	252.8	109.74
1614	252.9	120.22
1615	253	130.23
1616	253.1	130.58
1617	253.2	115.99
1618	253.3	88.25
1619	253.4	57.77
1620	253.5	33.94
1621	253.6	31.09
1622	253.7	39.29
1623	253.8	40.11
1624	253.9	25.59
1625	254	6.28
1626	254.1	3.14
1627	254.2	24.41
1628	254.3	119.78
1629	254.4	373.84
1630	254.5	925.77
1631	254.6	1807.73
1632	254.7	2896.77
1633	254.8	3921.29
1634	254.9	4612.12
1635	255	4943.8
1636	255.1	5109.37
1637	255.2	5148.25
1638	255.3	4744.71
1639	255.4	3642.88
1640	255.5	2146.83
1641	255.6	958.98
1642	255.7	529.47
1643	255.8	647.85
1644	255.9	922.89
1645	256	1038.93
1646	256.1	991.4
1647	256.2	953.11
1648	256.3	972.31
1649	256.4	910.85
1650	256.5	690.54
1651	256.6	430.8
1652	256.7	317.13
1653	256.8	329.86
1654	256.9	361.82
1655	257	361.38
1656	257.1	375.43
1657	257.2	411.12
1658	257.3	394.47
1659	257.4	296.51
1660	257.5	158.64
1661	257.6	51.01
1662	257.7	0.65
1663	257.8	0
1664	257.9	18.51
1665	258	31.94
1666	258.1	30.23
1667	258.2	32.71
1668	258.3	37.41
1669	258.4	35.91
1670	258.5	24.69
1671	258.6	9.89
1672	258.7	0
1673	259.1	0
1674	259.2	3.26
1675	259.3	2.39
1676	259.4	0.5
1677	259.5	1.99
1678	259.6	3.09
1679	259.7	0
1680	260.1	0
1681	260.2	1.63
1682	260.3	4.33
1683	260.4	3.8
1684	260.5	5.09
1685	260.6	9.22
1686	260.7	10.76
1687	260.8	5.28
1688	260.9	0
1689	262.5	0
1690	262.6	13.86
1691	262.7	33.04
1692	262.8	38.11
1693	262.9	50.74
1694	263	80.01
1695	263.1	105.1
1696	263.2	98.93
1697	263.3	69.01
1698	263.4	27.68
1699	263.5	0
1700	263.7	0
1701	263.8	2.1
1702	263.9	12.8
1703	264	11.33
1704	264.1	0.87
1705	264.2	0
1706	264.3	3.68
1707	264.4	16.63
1708	264.5	20.43
1709	264.6	13.65
1710	264.7	11.47
1711	264.8	23
1712	264.9	41.56
1713	265	62.78
1714	265.1	90.59
1715	265.2	108.03
1716	265.3	89.02
1717	265.4	44.91
1718	265.5	16.62
1719	265.6	29.27
1720	265.7	47.46
1721	265.8	47.7
1722	265.9	25.83
1723	266	0.36
1724	266.1	0
1725	266.3	0
1726	266.4	6.7
1727	266.5	15.47
1728	266.6	16.69
1729	266.7	8.1
1730	266.8	0
1731	266.9	2.33
1732	267	18.98
1733	267.1	33.79
1734	267.2	33.22
1735	267.3	18.95
1736	267.4	4.88
1737	267.5	5.1
1738	267.6	21.55
1739	267.7	39.77
1740	267.8	40.52
1741	267.9	21.5
1742	268	1.36
1743	268.1	0
1744	268.2	4.93
1745	268.3	12.57
1746	268.4	12.35
1747	268.5	8.88
1748	268.6	8.66
1749	268.7	13.82
1750	268.8	21.5
1751	268.9	25.8
1752	269	22.68
1753	269.1	14.06
1754	269.2	6.28
1755	269.3	3.41
1756	269.4	3.67
1757	269.5	3.12
1758	269.6	0.86
1759	269.7	0
1760	269.8	1.97
1761	269.9	9.98
1762	270	19.99
1763	270.1	24.99
1764	270.2	20.71
1765	270.3	10.4
1766	270.4	1.61
1767	270.5	0
1768	270.6	3
1769	270.7	12.66
1770	270.8	30.65
1771	270.9	60.42
1772	271	91.69
1773	271.1	108.85
1774	271.2	99.97
1775	271.3	71.78
1776	271.4	44.75
1777	271.5	38.96
1778	271.6	51.49
1779	271.7	64.2
1780	271.8	60.37
1781	271.9	40.61
1782	272	26.67
1783	272.1	28.61
1784	272.2	33.46
1785	272.3	34.84
1786	272.4	52.53
1787	272.5	213.6
1788	272.6	531.84
1789	272.7	945.44
1790	272.8	1320.18
1791	272.9	1600.89
1792	273	1769.96
1793	273.1	1807.89
1794	273.2	1694.65
1795	273.3	1399.32
1796	273.4	931.67
1797	273.5	437.38
1798	273.6	145
1799	273.7	126.35
1800	273.8	274.46
1801	273.9	414.89
1802	274	451.88
1803	274.1	410.63
1804	274.2	369.81
1805	274.3	352.14
1806	274.4	306.43
1807	274.5	191.43
1808	274.6	50.48
1809	274.7	0
1810	275.1	0
1811	275.2	4.5
1812	275.3	14.4
1813	275.4	12.14
1814	275.5	6.61
1815	275.6	4.63
1816	275.7	6.49
1817	275.8	5.61
1818	275.9	0
1819	276.3	0
1820	276.4	19.87
1821	276.5	21.38
1822	276.6	22.35
1823	276.7	20.71
1824	276.8	12.43
1825	276.9	2.09
1826	277	0.15
1827	277.1	4.99
1828	277.2	2.31
1829	277.3	0
1830	277.4	0
1831	277.5	2.74
1832	277.6	4.01
1833	277.7	2.31
1834	277.8	2.8
1835	277.9	4.99
1836	278	2.86
1837	278.1	0
1838	278.3	0
1839	278.4	4.78
1840	278.5	9.05
1841	278.6	11.02
1842	278.7	2.28
1843	278.8	0
1844	279.3	0
1845	279.4	12.22
1846	279.5	20.01
1847	279.6	29.25
1848	279.7	36.51
1849	279.8	28.12
1850	279.9	14.75
1851	280	11.25
1852	280.1	4.34
1853	280.2	18.57
1854	280.3	231.92
1855	280.4	1106.49
1856	280.5	3122.65
1857	280.6	6319.64
1858	280.7	10430.3
1859	280.8	14787.3
1860	280.9	18537
1861	281	21178.1
1862	281.1	22835.5
1863	281.2	23460.6
1864	281.3	21930.4
1865	281.4	17139
1866	281.5	10200.5
1867	281.6	4266.47
1868	281.7	1696.01
1869	281.8	2129.65
1870	281.9	3616.76
1871	282	4780.56
1872	282.1	5339.57
1873	282.2	5300.48
1874	282.3	4535.53
1875	282.4	3117.36
1876	282.5	1587.47
1877	282.6	594.28
1878	282.7	307.77
1879	282.8	345.16
1880	282.9	440.62
1881	283	475.2
1882	283.1	492.83
1883	283.2	467.58
1884	283.3	343.8
1885	283.4	162.57
1886	283.5	31.31
1887	283.6	0
1888	284	0
1889	284.1	15.26
1890	284.2	29.63
1891	284.3	19.11
1892	284.4	0
1893	284.7	0
1894	284.8	8.69
1895	284.9	3.44
1896	285	0
1897	285.1	0
1898	285.2	2.87
1899	285.3	0
1900	286.5	0
1901	286.6	16.32
1902	286.7	21.38
1903	286.8	16.04
1904	286.9	11.2
1905	287	11
1906	287.1	13.4
1907	287.2	14.44
1908	287.3	12.13
1909	287.4	7.01
1910	287.5	1.55
1911	287.6	0
1912	287.7	0
1913	287.8	4.74
1914	287.9	11.3
1915	288	13.87
1916	288.1	9.67
1917	288.2	2.35
1918	288.3	0
1919	288.5	0
1920	288.6	0.54
1921	288.7	0
1922	289.1	0
1923	289.2	4.52
1924	289.3	7.12
1925	289.4	6.25
1926	289.5	4.41
1927	289.6	2.15
1928	289.7	0
1929	290.2	0
1930	290.3	8.81
1931	290.4	7.29
1932	290.5	2.29
1933	290.6	0
1934	291	0
1935	291.1	1.09
1936	291.2	0
1937	291.5	0
1938	291.6	10.56
1939	291.7	20.61
1940	291.8	15.75
1941	291.9	0.79
1942	292	0
1943	292.5	0
1944	292.6	15.12
1945	292.7	27.53
1946	292.8	22.61
1947	292.9	15.02
1948	293	22.55
1949	293.1	34.75
1950	293.2	30.77
1951	293.3	14.27
1952	293.4	1.58
1953	293.5	0
1954	293.6	1.35
1955	293.7	5.89
1956	293.8	10.58
1957	293.9	11.25
1958	294	6.86
1959	294.1	3.15
1960	294.2	5.9
1961	294.3	14.16
1962	294.4	20.44
1963	294.5	22.05
1964	294.6	9.6
1965	294.7	0
1966	294.8	0
1967	294.9	22.75
1968	295	96.18
1969	295.1	176.58
1970	295.2	207.53
1971	295.3	160.81
1972	295.4	77.58
1973	295.5	18.2
1974	295.6	18.5
1975	295.7	42.37
1976	295.8	61.57
1977	295.9	70.69
1978	296	64.17
1979	296.1	98.08
1980	296.2	190.17
1981	296.3	320.31
1982	296.4	238.48
1983	296.5	0
1984	296.9	0
1985	297	132.83
1986	297.1	119.57
1987	297.2	70.97
1988	297.3	0
1989	298	0
1990	298.1	195.59
1991	298.2	473.28
1992	298.3	1340.9
1993	298.4	6018.55
1994	298.5	21670.6
1995	298.6	52725.5
1996	298.7	95812.3
1997	298.8	141879
[truncated: 2,390 more rows]

[truncated: 8 more sheets: Sheet11, Sheet12, Sheet13, Sheet14, Sheet15, Sheet16, Sheet17, Sheet18]
