# Supplementary material for: Electron transfer engineering of artificially designed cell factory for complete biosynthesis of natural products
Source: Research Square preprint supplement (doi:10.21203/rs.3.rs-4718218/v1), 2024-08-01
Supplement: Supplementary file 7 [file MSdata_Blank-r003.XLS.xls]

## Sheet: Sheet1
+ESI Scan (rt: 13.30-13.53 min, 51 scans) Frag=100.0V CF=0.000 DF=0.000 Blank-r003.d Subtract
Index	X	Y
0	50	0.29
1	50.1	0.09
2	50.2	0
3	50.8	0
4	50.9	0.21
5	51	0.61
6	51.1	0.77
7	51.2	0.55
8	51.3	0
9	51.4	0
10	52.3	0
11	52.4	0.18
12	52.5	0.26
13	52.6	0
14	52.8	0
15	52.9	0.29
16	53	0.4
17	53.1	0.08
18	53.2	0
19	53.4	0
20	53.5	0.34
21	53.6	0.65
22	53.7	0.8
23	53.8	0.75
24	53.9	0.25
25	54	0
26	54.5	0
27	54.6	12.43
28	54.7	41.37
29	54.8	61.57
30	54.9	58.28
31	55	28.45
32	55.1	0
33	55.4	0
34	55.5	20.33
35	55.6	17.36
36	55.7	0.57
37	55.8	0
38	55.9	1.57
39	56	3.38
40	56.1	0.74
41	56.2	0
42	56.3	3.59
43	56.4	10.98
44	56.5	13.5
45	56.6	8.06
46	56.7	0
47	56.9	0
48	57	23.48
49	57.1	273.1
50	57.2	442.67
51	57.3	421.69
52	57.4	277.27
53	57.5	131.98
54	57.6	50.94
55	57.7	10.61
56	57.8	0
57	58.4	0
58	58.5	78.46
59	58.6	145.18
60	58.7	155.82
61	58.8	221.54
62	58.9	344.92
63	59	481.78
64	59.1	578.73
65	59.2	650.06
66	59.3	693.19
67	59.4	620.77
68	59.5	387.3
69	59.6	111.92
70	59.7	0
71	59.8	16.91
72	59.9	0
73	60.2	0
74	60.3	0.65
75	60.4	0
76	61.1	0
77	61.2	207.59
78	61.3	476.32
79	61.4	532.11
80	61.5	354.76
81	61.6	119.65
82	61.7	19.82
83	61.8	0.1
84	61.9	13.65
85	62	0
86	62.5	0
87	62.6	21.86
88	62.7	27.15
89	62.8	22.62
90	62.9	19.38
91	63	24.23
92	63.1	29.39
93	63.2	24.99
94	63.3	11.72
95	63.4	0
96	64.2	0
97	64.3	12.76
98	64.4	10.28
99	64.5	0.45
100	64.6	0
101	64.9	0
102	65	0.04
103	65.1	0.44
104	65.2	0.2
105	65.3	0.2
106	65.4	0.69
107	65.5	1.15
108	65.6	1.14
109	65.7	0.89
110	65.8	0.62
111	65.9	0.28
112	66	0
113	66.7	0
114	66.8	3.28
115	66.9	9.67
116	67	13.21
117	67.1	10.38
118	67.2	3.55
119	67.3	0
120	68.4	0
121	68.5	3.33
122	68.6	16.64
123	68.7	39.45
124	68.8	69.8
125	68.9	89.28
126	69	82.18
127	69.1	49.98
128	69.2	13.04
129	69.3	0
130	69.8	0
131	69.9	2.37
132	70	11.07
133	70.1	13.6
134	70.2	7.1
135	70.3	0.22
136	70.4	10.71
137	70.5	53.43
138	70.6	119.75
139	70.7	166.45
140	70.8	183.96
141	70.9	148.35
142	71	54.06
143	71.1	0
144	71.3	0
145	71.4	42.11
146	71.5	65.18
147	71.6	12.36
148	71.7	0
149	72.5	0
150	72.6	24.68
151	72.7	196.63
152	72.8	189.95
153	72.9	0
154	73.3	0
155	73.4	194.54
156	73.5	181.81
157	73.6	0
158	73.8	0
159	73.9	10.49
160	74	48.39
161	74.1	0
162	74.3	0
163	74.4	33.45
164	74.5	68.93
165	74.6	58.28
166	74.7	17.02
167	74.8	0
168	75.4	0
169	75.5	33.83
170	75.6	38.33
171	75.7	14.35
172	75.8	0
173	76	0
174	76.1	11.51
175	76.2	16.93
176	76.3	12.73
177	76.4	3.04
178	76.5	0
179	77.1	0
180	77.2	15.55
181	77.3	62.98
182	77.4	69.25
183	77.5	49.68
184	77.6	21.96
185	77.7	11.38
186	77.8	16.72
187	77.9	18.2
188	78	2.65
189	78.1	0
190	78.6	0
191	78.7	14.26
192	78.8	37.71
193	78.9	27.61
194	79	0
195	79.5	0
196	79.6	4.33
197	79.7	0
198	79.8	0
199	79.9	15.75
200	80	34.5
201	80.1	42.7
202	80.2	36.15
203	80.3	20.74
204	80.4	0
205	80.7	0
206	80.8	29.95
207	80.9	81.58
208	81	51.29
209	81.1	0
210	81.5	0
211	81.6	2.46
212	81.7	8.11
213	81.8	1.13
214	81.9	0
215	83	0
216	83.1	13.92
217	83.2	43.09
218	83.3	10.51
219	83.4	0
220	84.3	0
221	84.4	24.49
222	84.5	25.4
223	84.6	0
224	85	0
225	85.1	42.15
226	85.2	58.76
227	85.3	50.95
228	85.4	34.34
229	85.5	18.18
230	85.6	3.53
231	85.7	0
232	86.2	0
233	86.3	1.84
234	86.4	13.4
235	86.5	41.98
236	86.6	73.45
237	86.7	93.24
238	86.8	54.09
239	86.9	0
240	87.1	0
241	87.2	9.16
242	87.3	124.17
243	87.4	142.38
244	87.5	78.1
245	87.6	10.41
246	87.7	0
247	87.8	0
248	87.9	14.12
249	88	32.95
250	88.1	56.42
251	88.2	67.44
252	88.3	66.77
253	88.4	0
254	88.6	0
255	88.7	385.16
256	88.8	1004.53
257	88.9	1359.19
258	89	1198.64
259	89.1	797.81
260	89.2	533.23
261	89.3	352.55
262	89.4	29.25
263	89.5	0
264	89.9	0
265	90	40.33
266	90.1	67.29
267	90.2	32.65
268	90.3	0
269	91	0
270	91.1	19.34
271	91.2	282.96
272	91.3	351.3
273	91.4	209.28
274	91.5	27.61
275	91.6	0
276	92.4	0
277	92.5	4.31
278	92.6	17.51
279	92.7	39.58
280	92.8	62.37
281	92.9	78.58
282	93	86.34
283	93.1	81.52
284	93.2	60.27
285	93.3	28.48
286	93.4	3.29
287	93.5	0
288	93.6	7.57
289	93.7	12.84
290	93.8	10.47
291	93.9	4.18
292	94	0
293	94.4	0
294	94.5	3.95
295	94.6	23
296	94.7	48.49
297	94.8	58.65
298	94.9	41.59
299	95	11.79
300	95.1	0
301	95.2	6.9
302	95.3	22.37
303	95.4	22.13
304	95.5	12.49
305	95.6	0.45
306	95.7	0
307	96.3	0
308	96.4	4.31
309	96.5	0.95
310	96.6	0
311	97.2	0
312	97.3	55.15
313	97.4	100.08
314	97.5	93.69
315	97.6	49.13
316	97.7	5.66
317	97.8	0
318	97.9	7.37
319	98	18.55
320	98.1	8.22
321	98.2	0
322	98.3	20.5
323	98.4	141.79
324	98.5	258.92
325	98.6	233.46
326	98.7	76.92
327	98.8	0
328	99.8	0
329	99.9	10.51
330	100	0
331	100.2	0
332	100.3	4.98
333	100.4	99.25
334	100.5	192.17
335	100.6	238.13
336	100.7	212.75
337	100.8	173.44
338	100.9	182.44
339	101	225.22
340	101.1	226.03
341	101.2	155.21
342	101.3	66.6
343	101.4	1.05
344	101.5	0
345	101.9	0
346	102	130.16
347	102.1	240.56
348	102.2	48.75
349	102.3	0
350	102.5	0
351	102.6	76.72
352	102.7	186.5
353	102.8	62.06
354	102.9	0
355	103	64.47
356	103.1	235.71
357	103.2	364.24
358	103.3	370.57
359	103.4	264.83
360	103.5	116.89
361	103.6	11.58
362	103.7	0
363	104	0
364	104.1	31.16
365	104.2	49.13
366	104.3	19.15
367	104.4	0
368	104.5	0
369	104.6	25.39
370	104.7	68.56
371	104.8	67.94
372	104.9	30.97
373	105	0
374	105.6	0
375	105.7	42.77
376	105.8	69.64
377	105.9	71.07
378	106	57.53
379	106.1	45.81
380	106.2	46.01
381	106.3	41.34
382	106.4	0
383	107	0
384	107.1	77.44
385	107.2	216.64
386	107.3	228.19
387	107.4	109.18
388	107.5	0
389	108.5	0
390	108.6	9.22
391	108.7	45.56
392	108.8	69.33
393	108.9	52.37
394	109	21.11
395	109.1	16.18
396	109.2	30.78
397	109.3	26.23
398	109.4	3.32
399	109.5	0
400	109.6	3.81
401	109.7	23.1
402	109.8	35.57
403	109.9	39.22
404	110	35.69
405	110.1	31.56
406	110.2	29.94
407	110.3	34.21
408	110.4	18.88
409	110.5	0
410	110.8	0
411	110.9	21.15
412	111	185.87
413	111.1	301.54
414	111.2	265.63
415	111.3	105.02
416	111.4	0
417	111.6	0
418	111.7	21.72
419	111.8	69.73
420	111.9	91.91
421	112	57.02
422	112.1	0
423	112.3	0
424	112.4	40.6
425	112.5	95.02
426	112.6	108.56
427	112.7	92
428	112.8	39.82
429	112.9	0
430	113.4	0
431	113.5	28.8
432	113.6	82.08
433	113.7	87.89
434	113.8	53.48
435	113.9	0
436	114.6	0
437	114.7	93.59
438	114.8	197.67
439	114.9	211.82
440	115	153.07
441	115.1	89.52
442	115.2	86.2
443	115.3	156.38
444	115.4	237.42
445	115.5	230.35
446	115.6	105.48
447	115.7	0
448	116	0
449	116.1	68.28
450	116.2	34.71
451	116.3	0
452	116.4	0
453	116.5	40.45
454	116.6	123.39
455	116.7	130.71
456	116.8	34.43
457	116.9	0
458	117.2	0
459	117.3	10.21
460	117.4	33.73
461	117.5	56.66
462	117.6	72.88
463	117.7	66.74
464	117.8	50.29
465	117.9	35.95
466	118	31.02
467	118.1	31.2
468	118.2	20.85
469	118.3	4.83
470	118.4	0
471	118.7	0
472	118.8	19.65
473	118.9	70.81
474	119	152.32
475	119.1	194.86
476	119.2	125.49
477	119.3	0
478	119.5	0
479	119.6	9.6
480	119.7	20.33
481	119.8	12.27
482	119.9	10.54
483	120	36.49
484	120.1	71.34
485	120.2	71.48
486	120.3	12.56
487	120.4	0
488	120.6	0
489	120.7	133.61
490	120.8	322.6
491	120.9	301.94
492	121	165.42
493	121.1	160.07
494	121.2	347.16
495	121.3	497.2
496	121.4	388.01
497	121.5	101.11
498	121.6	0
499	121.7	0
500	121.8	72.55
501	121.9	90.18
502	122	3.28
503	122.1	0
504	122.6	0
505	122.7	34.89
506	122.8	52.01
507	122.9	27.05
508	123	0
509	123.2	0
510	123.3	9.41
511	123.4	25.23
512	123.5	0
513	123.8	0
514	123.9	9.12
515	124	2.9
516	124.1	0
517	126.2	0
518	126.3	5.97
519	126.4	0
520	126.7	0
521	126.8	13.9
522	126.9	68.66
523	127	38.21
524	127.1	0
525	127.3	0
526	127.4	32.89
527	127.5	47.24
528	127.6	45.45
529	127.7	41.76
530	127.8	21.38
531	127.9	0
532	128.4	0
533	128.5	20.02
534	128.6	38.89
535	128.7	26.17
536	128.8	0
537	128.9	0
538	129	40.34
539	129.1	90.33
540	129.2	82.78
541	129.3	11.45
542	129.4	0
543	129.8	0
544	129.9	38.99
545	130	55.93
546	130.1	13.44
547	130.2	0
548	130.3	0
549	130.4	41.15
550	130.5	26.79
551	130.6	0
552	131	0
553	131.1	30.95
554	131.2	97.48
555	131.3	72.58
556	131.4	13.15
557	131.5	0
558	131.9	0
559	132	5.68
560	132.1	0
561	132.4	0
562	132.5	64.58
563	132.6	121.2
564	132.7	101.61
565	132.8	38.66
566	132.9	18.68
567	133	80.79
568	133.1	150.12
569	133.2	133.19
570	133.3	45.48
571	133.4	0
572	133.6	0
573	133.7	11.08
574	133.8	1.94
575	133.9	0
576	134	2.63
577	134.1	25.52
578	134.2	43.89
579	134.3	42.77
580	134.4	22.75
581	134.5	13.96
582	134.6	19.23
583	134.7	13.97
584	134.8	0
585	136.2	0
586	136.3	62.9
587	136.4	269.87
588	136.5	452.96
589	136.6	437.22
590	136.7	118.16
591	136.8	0
592	137.1	0
593	137.2	104.09
594	137.3	68.15
595	137.4	0
596	137.6	0
597	137.7	66.12
598	137.8	24.78
599	137.9	0
600	138.5	0
601	138.6	34.88
602	138.7	94.48
603	138.8	113.15
604	138.9	93.28
605	139	53.82
606	139.1	20.9
607	139.2	5.93
608	139.3	0
609	140.3	0
610	140.4	25.39
611	140.5	60.12
612	140.6	87.32
613	140.7	75.77
614	140.8	25.62
615	140.9	0
616	142	0
617	142.1	13.84
618	142.2	30.94
619	142.3	41.3
620	142.4	37.12
621	142.5	0
622	143	0
623	143.1	54.17
624	143.2	41
625	143.3	0
626	143.6	0
627	143.7	29.25
628	143.8	28.56
629	143.9	3.58
630	144	0
631	145	0
632	145.1	103.48
633	145.2	71.8
634	145.3	0
635	145.4	0
636	145.5	6.77
637	145.6	70.04
638	145.7	23.97
639	145.8	4.06
640	145.9	7.62
641	146	6.48
642	146.1	0
643	147.8	0
644	147.9	5.05
645	148	67.26
646	148.1	130.07
647	148.2	295.26
648	148.3	900.44
649	148.4	2166.68
650	148.5	3908.61
651	148.6	5811.27
652	148.7	7675.24
653	148.8	9212.15
654	148.9	10017.9
655	149	9998.95
656	149.1	9416.2
657	149.2	8269.73
658	149.3	6282.12
659	149.4	3704.5
660	149.5	1520.09
661	149.6	506.29
662	149.7	388.85
663	149.8	529.85
664	149.9	654.18
665	150	735.81
666	150.1	740.44
667	150.2	605.87
668	150.3	382.61
669	150.4	190.25
670	150.5	65.9
671	150.6	5.36
672	150.7	5.1
673	150.8	50.19
674	150.9	93.62
675	151	76.35
676	151.1	12.26
677	151.2	0
678	151.3	0
679	151.4	15.94
680	151.5	35.38
681	151.6	21.2
682	151.7	1.58
683	151.8	0
684	152.2	0
685	152.3	53.38
686	152.4	133.16
687	152.5	162.36
688	152.6	123.78
689	152.7	65.03
690	152.8	51.14
691	152.9	97
692	153	100.84
693	153.1	0
694	153.4	0
695	153.5	31.38
696	153.6	56.43
697	153.7	21.13
698	153.8	3.13
699	153.9	0
700	154.2	0
701	154.3	19.43
702	154.4	62.61
703	154.5	87.96
704	154.6	80.36
705	154.7	57.77
706	154.8	45.29
707	154.9	29.67
708	155	0
709	155.6	0
710	155.7	10.56
711	155.8	46.4
712	155.9	65.21
713	156	41.43
714	156.1	0
715	156.5	0
716	156.6	11.42
717	156.7	95.1
718	156.8	147.7
719	156.9	130.73
720	157	61.12
721	157.1	0
722	157.5	0
723	157.6	41.78
724	157.7	55.3
725	157.8	30.45
726	157.9	0
727	158	0
728	158.1	4.93
729	158.2	6.15
730	158.3	0
731	158.4	0
732	158.5	28.81
733	158.6	64.91
734	158.7	53.31
735	158.8	0
736	159.5	0
737	159.6	3.78
738	159.7	5.37
739	159.8	0
740	160.3	0
741	160.4	5.95
742	160.5	0
743	160.8	0
744	160.9	10.84
745	161	82.4
746	161.1	95.91
747	161.2	32.77
748	161.3	0
749	161.6	0
750	161.7	1.14
751	161.8	0
752	162	0
753	162.1	7.53
754	162.2	6.48
755	162.3	13.19
756	162.4	42.12
757	162.5	71.55
758	162.6	70.97
759	162.7	29.36
760	162.8	0
761	163.1	0
762	163.2	15.76
763	163.3	66.29
764	163.4	64.12
765	163.5	36.34
766	163.6	11.5
767	163.7	1.33
768	163.8	0
769	163.9	5.21
770	164	9.88
771	164.1	4.18
772	164.2	0
773	164.5	0
774	164.6	8.55
775	164.7	9.53
776	164.8	0
777	165.4	0
778	165.5	2.59
779	165.6	4.04
780	165.7	7.7
781	165.8	15.52
782	165.9	20.83
783	166	17.43
784	166.1	7.12
785	166.2	0
786	166.3	0
787	166.4	9.63
788	166.5	36.37
789	166.6	62.75
790	166.7	75.8
791	166.8	78.55
792	166.9	76.47
793	167	62.94
794	167.1	34.92
795	167.2	7.17
796	167.3	0
797	168.4	0
798	168.5	0.87
799	168.6	6.75
800	168.7	10.42
801	168.8	10.19
802	168.9	6.15
803	169	0.05
804	169.1	0
805	169.7	0
806	169.8	11.58
807	169.9	14.16
808	170	13.32
809	170.1	8.92
810	170.2	1.82
811	170.3	0
812	171.3	0
813	171.4	16.35
814	171.5	18.25
815	171.6	13.85
816	171.7	5.48
817	171.8	6.99
818	171.9	24.6
819	172	39.22
820	172.1	32.75
821	172.2	1.69
822	172.3	0
823	172.6	0
824	172.7	12.65
825	172.8	19.43
826	172.9	27.62
827	173	35.23
828	173.1	31.26
829	173.2	11.48
830	173.3	0
831	173.4	0
832	173.5	0.09
833	173.6	6.82
834	173.7	3.81
835	173.8	0
836	174.1	0
837	174.2	0.29
838	174.3	1.03
839	174.4	0
840	174.7	0
841	174.8	21.67
842	174.9	52.24
843	175	52.97
844	175.1	31.09
845	175.2	11.22
846	175.3	6.98
847	175.4	7.17
848	175.5	4.67
849	175.6	0.65
850	175.7	0
851	175.8	2.21
852	175.9	2.81
853	176	0
854	176.8	0
855	176.9	44.23
856	177	93
857	177.1	77.11
858	177.2	5.76
859	177.3	0
860	177.5	0
861	177.6	13.69
862	177.7	17.67
863	177.8	14.66
864	177.9	23.2
865	178	30.84
866	178.1	27.5
867	178.2	22.68
868	178.3	29.83
869	178.4	52.77
870	178.5	76.57
871	178.6	81.07
872	178.7	56.42
873	178.8	6.17
874	178.9	0
875	179.4	0
876	179.5	3.18
877	179.6	9.75
878	179.7	17.02
879	179.8	17.16
880	179.9	6.8
881	180	0
882	180.2	0
883	180.3	0.47
884	180.4	5.04
885	180.5	2.77
886	180.6	0
887	182.8	0
888	182.9	19.84
889	183	31.74
890	183.1	24.4
891	183.2	7.3
892	183.3	0
893	183.4	6.11
894	183.5	14.15
895	183.6	10.91
896	183.7	5.28
897	183.8	9.59
898	183.9	21.36
899	184	25.87
900	184.1	14.34
901	184.2	0
902	184.6	0
903	184.7	5.73
904	184.8	10.07
905	184.9	0.55
906	185	0
907	185.2	0
908	185.3	15.63
909	185.4	25.61
910	185.5	24.51
911	185.6	12.36
912	185.7	0.77
913	185.8	0
914	187.3	0
915	187.4	5.13
916	187.5	9.43
917	187.6	7.7
918	187.7	3.83
919	187.8	2.22
920	187.9	3.85
921	188	5.47
922	188.1	4.52
923	188.2	2.76
924	188.3	3.73
925	188.4	8.02
926	188.5	12.84
927	188.6	14.37
928	188.7	6.18
929	188.8	0
930	189.7	0
931	189.8	0.69
932	189.9	0
933	190	0
934	190.1	0.34
935	190.2	10.46
936	190.3	19.3
937	190.4	16.45
938	190.5	0
939	191	0
940	191.1	20.04
941	191.2	42.99
942	191.3	49.49
943	191.4	48.3
944	191.5	38.65
945	191.6	21.65
946	191.7	10.23
947	191.8	8.5
948	191.9	5.91
949	192	0
950	193.1	0
951	193.2	6.88
952	193.3	2.84
953	193.4	0.99
954	193.5	1.27
955	193.6	3.29
956	193.7	4.43
957	193.8	0
958	194.3	0
959	194.4	4.95
960	194.5	5.12
961	194.6	0
962	195.5	0
963	195.6	3.97
964	195.7	2.59
965	195.8	3.72
966	195.9	11.97
967	196	19.92
968	196.1	17.94
969	196.2	6.11
970	196.3	0
971	196.9	0
972	197	6.68
973	197.1	12.37
974	197.2	0
975	197.5	0
976	197.6	11.19
977	197.7	34.06
978	197.8	41.98
979	197.9	35.06
980	198	21.98
981	198.1	8.22
982	198.2	0
983	198.3	0
984	198.4	6.07
985	198.5	5.08
986	198.6	0
987	199.1	0
988	199.2	6.06
989	199.3	14.93
990	199.4	16.74
991	199.5	14.03
992	199.6	10.08
993	199.7	7.44
994	199.8	3.81
995	199.9	0
996	200.9	0
997	201	7.08
998	201.1	34.08
999	201.2	38.92
1000	201.3	23.38
1001	201.4	4.22
1002	201.5	0
1003	201.6	5.71
1004	201.7	21.48
1005	201.8	47.05
1006	201.9	68.24
1007	202	66.91
1008	202.1	40.96
1009	202.2	10.09
1010	202.3	0
1011	202.4	0
1012	202.5	4.71
1013	202.6	7.04
1014	202.7	0
1015	203.6	0
1016	203.7	8.92
1017	203.8	21.46
1018	203.9	28.89
1019	204	24.02
1020	204.1	26.06
1021	204.2	137.68
1022	204.3	543.79
1023	204.4	1156.36
1024	204.5	1744.7
1025	204.6	2528.52
1026	204.7	3957.5
1027	204.8	5847.06
1028	204.9	7311.49
1029	205	7770.69
1030	205.1	7405.4
1031	205.2	6480.51
1032	205.3	4949.77
1033	205.4	2974.89
1034	205.5	1233.49
1035	205.6	370.73
1036	205.7	341.12
1037	205.8	584.35
1038	205.9	801.05
1039	206	881.51
1040	206.1	863.09
1041	206.2	750.54
1042	206.3	521.31
1043	206.4	240.08
1044	206.5	27.36
1045	206.6	0
1046	206.7	0
1047	206.8	17.33
1048	206.9	36.76
1049	207	10.23
1050	207.1	0
1051	207.2	0
1052	207.3	30.75
1053	207.4	39.38
1054	207.5	23.3
1055	207.6	0
1056	207.9	0
1057	208	16.4
1058	208.1	39.18
1059	208.2	57.9
1060	208.3	56.62
1061	208.4	37.89
1062	208.5	9.29
1063	208.6	0
1064	208.7	0
1065	208.8	5.23
1066	208.9	29.44
1067	209	36.17
1068	209.1	21.14
1069	209.2	0.21
1070	209.3	0
1071	209.5	0
1072	209.6	2.4
1073	209.7	6.56
1074	209.8	15.62
1075	209.9	21.01
1076	210	15.34
1077	210.1	0
1078	210.5	0
1079	210.6	0.41
1080	210.7	6.02
1081	210.8	3.8
1082	210.9	0
1083	211.7	0
1084	211.8	4.22
1085	211.9	10.36
1086	212	10.3
1087	212.1	5.8
1088	212.2	1.75
1089	212.3	1.31
1090	212.4	2.5
1091	212.5	1.82
1092	212.6	0
1093	215.3	0
1094	215.4	2.55
1095	215.5	7.99
1096	215.6	9.45
1097	215.7	10.27
1098	215.8	8.89
1099	215.9	4.35
1100	216	1.18
1101	216.1	4.18
1102	216.2	10.98
1103	216.3	14.32
1104	216.4	10.52
1105	216.5	2.62
1106	216.6	0
1107	217.4	0
1108	217.5	5.75
1109	217.6	13.63
1110	217.7	20.38
1111	217.8	26.07
1112	217.9	27.95
1113	218	20.3
1114	218.1	0
1115	218.6	0
1116	218.7	5.98
1117	218.8	35.18
1118	218.9	57.09
1119	219	65.57
1120	219.1	67.06
1121	219.2	66.87
1122	219.3	58.64
1123	219.4	40.1
1124	219.5	18.59
1125	219.6	3.16
1126	219.7	0
1127	220.1	0
1128	220.2	3.27
1129	220.3	6.38
1130	220.4	5.33
1131	220.5	0
1132	221.8	0
1133	221.9	5.34
1134	222	23.98
1135	222.1	42.21
1136	222.2	41.45
1137	222.3	48.62
1138	222.4	156.95
1139	222.5	304.23
1140	222.6	371.15
1141	222.7	390.91
1142	222.8	512.02
1143	222.9	701.57
1144	223	691.77
1145	223.1	369.82
1146	223.2	0
1147	223.5	0
1148	223.6	0.05
1149	223.7	122.36
1150	223.8	163.08
1151	223.9	87.01
1152	224	0
1153	224.1	2.53
1154	224.2	83.95
1155	224.3	161.25
1156	224.4	198.35
1157	224.5	153.45
1158	224.6	52.21
1159	224.7	0
1160	225.2	0
1161	225.3	33.98
1162	225.4	85.21
1163	225.5	75.71
1164	225.6	39.79
1165	225.7	0
1166	225.9	0
1167	226	48.03
1168	226.1	89.21
1169	226.2	77.04
1170	226.3	36.1
1171	226.4	13
1172	226.5	17.34
1173	226.6	16.94
1174	226.7	7.09
1175	226.8	4.83
1176	226.9	16.74
1177	227	37.43
1178	227.1	54.56
1179	227.2	58.67
1180	227.3	46.74
1181	227.4	17.35
1182	227.5	0
1183	227.9	0
1184	228	26.31
1185	228.1	36.34
1186	228.2	12.13
1187	228.3	0
1188	228.6	0
1189	228.7	1.51
1190	228.8	6.13
1191	228.9	9.11
1192	229	10.2
1193	229.1	6.45
1194	229.2	0
1195	229.5	0
1196	229.6	0.84
1197	229.7	0
1198	230	0
1199	230.1	0.74
1200	230.2	5.25
1201	230.3	1.53
1202	230.4	0
1203	231	0
1204	231.1	4.21
1205	231.2	4.87
1206	231.3	1.81
1207	231.4	0
1208	231.5	6.52
1209	231.6	17.47
1210	231.7	19.9
1211	231.8	10.63
1212	231.9	0
1213	232.1	0
1214	232.2	2.61
1215	232.3	11.25
1216	232.4	19.41
1217	232.5	19.56
1218	232.6	10.35
1219	232.7	0
1220	233.2	0
1221	233.3	6.22
1222	233.4	5.21
1223	233.5	0
1224	234.2	0
1225	234.3	13.74
1226	234.4	26.06
1227	234.5	20.58
1228	234.6	9.47
1229	234.7	2.18
1230	234.8	0.62
1231	234.9	0
1232	235.4	0
1233	235.5	1.17
1234	235.6	8.68
1235	235.7	8.67
1236	235.8	6.94
1237	235.9	9.47
1238	236	12.55
1239	236.1	7.11
1240	236.2	0
1241	237	0
1242	237.1	1.03
1243	237.2	6.29
1244	237.3	11.55
1245	237.4	16.44
1246	237.5	16.85
1247	237.6	7.16
1248	237.7	0
1249	238	0
1250	238.1	2.46
1251	238.2	0
1252	238.5	0
1253	238.6	2.61
1254	238.7	0
1255	239	0
1256	239.1	3.89
1257	239.2	0
1258	239.6	0
1259	239.7	6.11
1260	239.8	8.32
1261	239.9	3.56
1262	240	0
1263	241	0
1264	241.1	16.2
1265	241.2	36.02
1266	241.3	14.69
1267	241.4	0
1268	241.6	0
1269	241.7	7.76
1270	241.8	11.17
1271	241.9	8.95
1272	242	4.11
1273	242.1	0
1274	242.5	0
1275	242.6	10.15
1276	242.7	17.68
1277	242.8	13.19
1278	242.9	0
1279	243.3	0
1280	243.4	1.65
1281	243.5	14.47
1282	243.6	22.93
1283	243.7	25.03
1284	243.8	20.62
1285	243.9	11.5
1286	244	2.32
1287	244.1	0
1288	245.1	0
1289	245.2	1.84
1290	245.3	2.61
1291	245.4	0
1292	245.8	0
1293	245.9	4.08
1294	246	1.43
1295	246.1	0
1296	246.9	0
1297	247	0.79
1298	247.1	0
1299	247.8	0
1300	247.9	3.4
1301	248	4.65
1302	248.1	3.27
1303	248.2	0.36
1304	248.3	3.15
1305	248.4	15.68
1306	248.5	27.63
1307	248.6	22.91
1308	248.7	4.22
1309	248.8	0
1310	249.7	0
1311	249.8	5.94
1312	249.9	0.91
1313	250	0
1314	250.2	0
1315	250.3	4.63
1316	250.4	16.32
1317	250.5	5.85
1318	250.6	0
1319	250.7	0.59
1320	250.8	31.6
1321	250.9	48.94
1322	251	28.21
1323	251.1	0
1324	251.5	0
1325	251.6	11.04
1326	251.7	27.06
1327	251.8	25.24
1328	251.9	0
1329	253.7	0
1330	253.8	2.44
1331	253.9	5.01
1332	254	2.35
1333	254.1	0
1334	254.2	0.57
1335	254.3	3.29
1336	254.4	4.86
1337	254.5	3.66
1338	254.6	0
1339	255.3	0
1340	255.4	0.41
1341	255.5	1.26
1342	255.6	1.32
1343	255.7	1.18
1344	255.8	0
1345	256.2	0
1346	256.3	7.43
1347	256.4	7.32
1348	256.5	0
1349	257.7	0
1350	257.8	1.25
1351	257.9	2.71
1352	258	3.73
1353	258.1	5.44
1354	258.2	6.3
1355	258.3	3.46
1356	258.4	0
1357	260.2	0
1358	260.3	0.59
1359	260.4	0.59
1360	260.5	0
1361	261.1	0
1362	261.2	4.08
1363	261.3	6.28
1364	261.4	3.13
1365	261.5	0
1366	261.8	0
1367	261.9	2
1368	262	4.3
1369	262.1	4.96
1370	262.2	0
1371	262.4	0
1372	262.5	14.17
1373	262.6	27.21
1374	262.7	12.67
1375	262.8	0
1376	263	0
1377	263.1	15.2
1378	263.2	6.89
1379	263.3	0
1380	264.1	0
1381	264.2	0.03
1382	264.3	0
1383	264.9	0
1384	265	11.4
1385	265.1	20.12
1386	265.2	16.16
1387	265.3	6.58
1388	265.4	0
1389	265.9	0
1390	266	7.35
1391	266.1	19.43
1392	266.2	24.61
1393	266.3	19.53
1394	266.4	8.02
1395	266.5	0
1396	266.8	0
1397	266.9	3.66
1398	267	16.14
1399	267.1	19.31
1400	267.2	14.15
1401	267.3	4.15
1402	267.4	0
1403	267.5	0
1404	267.6	9.29
1405	267.7	15.69
1406	267.8	9.01
1407	267.9	0
1408	268.3	0
1409	268.4	2.72
1410	268.5	4.21
1411	268.6	0
1412	269.8	0
1413	269.9	0.23
1414	270	1.44
1415	270.1	0
1416	270.7	0
1417	270.8	11.13
1418	270.9	20.61
1419	271	21.57
1420	271.1	13.39
1421	271.2	3.49
1422	271.3	0
1423	272.4	0
1424	272.5	17.75
1425	272.6	46.43
1426	272.7	67.31
1427	272.8	61.31
1428	272.9	33.4
1429	273	8.14
1430	273.1	2.52
1431	273.2	6.84
1432	273.3	9.51
1433	273.4	6.17
1434	273.5	3.24
1435	273.6	9.01
1436	273.7	24.98
1437	273.8	37.81
1438	273.9	34.9
1439	274	20.72
1440	274.1	11.5
1441	274.2	13.87
1442	274.3	16.9
1443	274.4	11.43
1444	274.5	2.58
1445	274.6	0
1446	274.9	0
1447	275	1.03
1448	275.1	2.23
1449	275.2	2.5
1450	275.3	0
1451	276	0
1452	276.1	0.29
1453	276.2	0.11
1454	276.3	0
1455	276.4	0
1456	276.5	1.82
1457	276.6	7.95
1458	276.7	16.63
1459	276.8	25.53
1460	276.9	29.63
1461	277	23.73
1462	277.1	9.6
1463	277.2	0
1464	277.3	0
1465	277.4	0.69
1466	277.5	23.06
1467	277.6	47.52
1468	277.7	55.57
1469	277.8	40.9
1470	277.9	19.24
1471	278	8.36
1472	278.1	24.68
1473	278.2	108.5
1474	278.3	464.53
1475	278.4	1539.54
1476	278.5	3754.96
1477	278.6	7108.46
1478	278.7	11121.9
1479	278.8	14926.8
1480	278.9	17673.5
1481	279	19055.3
1482	279.1	19278.7
1483	279.2	18246
1484	279.3	15301.8
1485	279.4	10439.8
1486	279.5	5296.2
1487	279.6	2077.39
1488	279.7	1406.8
1489	279.8	2133.54
1490	279.9	2954.43
1491	280	3221.76
1492	280.1	3051.86
1493	280.2	2682.64
1494	280.3	2165.61
1495	280.4	1504.16
1496	280.5	838.6
1497	280.6	368.45
1498	280.7	221.31
1499	280.8	308.95
1500	280.9	441.2
1501	281	492.89
1502	281.1	481.05
1503	281.2	441.88
1504	281.3	347.63
1505	281.4	183.79
1506	281.5	11.02
1507	281.6	0
1508	281.7	0
1509	281.8	34.74
1510	281.9	81.09
1511	282	67.55
1512	282.1	56.61
1513	282.2	69.11
1514	282.3	68.5
1515	282.4	36.3
1516	282.5	0
1517	283.4	0
1518	283.5	1.8
1519	283.6	0
1520	284.5	0
1521	284.6	17.13
1522	284.7	40.15
1523	284.8	49.66
1524	284.9	40.62
1525	285	18.86
1526	285.1	0
1527	285.4	0
1528	285.5	2.64
1529	285.6	8.13
1530	285.7	13.98
1531	285.8	17.17
1532	285.9	14.56
1533	286	7.53
1534	286.1	0.93
1535	286.2	0
1536	286.3	0.4
1537	286.4	10.69
1538	286.5	20.5
1539	286.6	18.64
1540	286.7	5.04
1541	286.8	0
1542	286.9	0
1543	287	5.49
1544	287.1	10.6
1545	287.2	8.43
1546	287.3	1.95
1547	287.4	0
1548	287.6	0
1549	287.7	5.31
1550	287.8	9.63
1551	287.9	9.29
1552	288	4.97
1553	288.1	0.76
1554	288.2	0
1555	289.4	0
1556	289.5	0.55
1557	289.6	0.98
1558	289.7	0
1559	290.2	0
1560	290.3	0.37
1561	290.4	1.33
1562	290.5	2.44
1563	290.6	2.6
1564	290.7	0.12
1565	290.8	0
1566	291.5	0
1567	291.6	0.08
1568	291.7	1.35
1569	291.8	1.17
1570	291.9	0.15
1571	292	0
1572	292.1	0.21
1573	292.2	0.01
1574	292.3	0
1575	292.4	0.26
1576	292.5	4.88
1577	292.6	9.49
1578	292.7	8.3
1579	292.8	0
1580	293.4	0
1581	293.5	1.47
1582	293.6	3.67
1583	293.7	1.96
1584	293.8	0
1585	295.3	0
1586	295.4	8.52
1587	295.5	15.08
1588	295.6	8.91
1589	295.7	1.14
1590	295.8	0.96
1591	295.9	2.62
1592	296	1.54
1593	296.1	0
1594	297.5	0
1595	297.6	14.93
1596	297.7	287.32
1597	297.8	471.29
1598	297.9	565.56
1599	298	539.47
1600	298.1	331.94
1601	298.2	2.12
1602	298.3	0
1603	298.6	0
1604	298.7	154.29
1605	298.8	250.03
1606	298.9	216.07
1607	299	119.87
1608	299.1	70.24
1609	299.2	62.88
1610	299.3	31.76
1611	299.4	0
1612	299.5	0
1613	299.6	10.01
1614	299.7	62.3
1615	299.8	115.51
1616	299.9	132.89
1617	300	102.79
1618	300.1	63.85
1619	300.2	95.05
1620	300.3	334.48
1621	300.4	1034.69
1622	300.5	2341.05
1623	300.6	4234.62
1624	300.7	6502.47
1625	300.8	8577.6
1626	300.9	9869.97
1627	301	10314.1
1628	301.1	10250.3
1629	301.2	9654.06
1630	301.3	8004.86
1631	301.4	5260.1
1632	301.5	2460.86
1633	301.6	852.48
1634	301.7	650.93
1635	301.8	1088.9
1636	301.9	1521.33
1637	302	1711.79
1638	302.1	1714.48
1639	302.2	1528.33
1640	302.3	1122.57
1641	302.4	613.33
1642	302.5	233.52
1643	302.6	69.36
1644	302.7	47.73
1645	302.8	69.28
1646	302.9	91.16
1647	303	129.48
1648	303.1	176.31
1649	303.2	196.67
1650	303.3	159.99
1651	303.4	81.92
1652	303.5	14.27
1653	303.6	0
1654	304.6	0
1655	304.7	0.1
1656	304.8	0.42
1657	304.9	0.69
1658	305	0
1659	305.2	0
1660	305.3	0.69
1661	305.4	4.53
1662	305.5	7.31
1663	305.6	8.72
1664	305.7	7.67
1665	305.8	3.79
1666	305.9	0.13
1667	306	0
1668	306.1	0.71
1669	306.2	3.36
1670	306.3	6.41
1671	306.4	7.63
1672	306.5	3.56
1673	306.6	0
1674	307.4	0
1675	307.5	2.45
1676	307.6	3.65
1677	307.7	3.22
1678	307.8	1.73
1679	307.9	0.34
1680	308	0
1681	308.2	0
1682	308.3	1.62
1683	308.4	7.03
1684	308.5	10.58
1685	308.6	8.03
1686	308.7	0.24
1687	308.8	0
1688	309.3	0
1689	309.4	5.75
1690	309.5	8.57
1691	309.6	5.56
1692	309.7	0.12
1693	309.8	0
1694	310.4	0
1695	310.5	3.44
1696	310.6	2.96
1697	310.7	0
1698	311.3	0
1699	311.4	0.66
1700	311.5	2.33
1701	311.6	1.74
1702	311.7	1.01
1703	311.8	0
1704	312	0
1705	312.1	1.51
1706	312.2	6.7
1707	312.3	9.36
1708	312.4	6.31
1709	312.5	0
1710	313.6	0
1711	313.7	1.69
1712	313.8	8.72
1713	313.9	13.86
1714	314	13.22
1715	314.1	7.74
1716	314.2	2.2
1717	314.3	0
1718	314.9	0
1719	315	1.43
1720	315.1	4.05
1721	315.2	4.32
1722	315.3	2.27
1723	315.4	0.08
1724	315.5	0
1725	316	0
1726	316.1	3.78
1727	316.2	20.73
1728	316.3	56.47
1729	316.4	142.34
1730	316.5	278.04
1731	316.6	436.92
1732	316.7	574.06
1733	316.8	669.69
1734	316.9	730.88
1735	317	763.57
1736	317.1	744.49
1737	317.2	636.84
1738	317.3	438.29
1739	317.4	211.52
1740	317.5	57.32
1741	317.6	0
1742	317.7	21.69
1743	317.8	65.41
1744	317.9	100.89
1745	318	108.5
1746	318.1	87.95
1747	318.2	52.25
1748	318.3	19.61
1749	318.4	4.09
1750	318.5	11.58
1751	318.6	34.32
1752	318.7	56.42
1753	318.8	70.21
1754	318.9	78.06
1755	319	83.08
1756	319.1	78.91
1757	319.2	58.79
1758	319.3	29.6
1759	319.4	7.39
1760	319.5	0.25
1761	319.6	4.6
1762	319.7	11.93
1763	319.8	14.36
1764	319.9	10.17
1765	320	4.89
1766	320.1	4.4
1767	320.2	7.42
1768	320.3	7.34
1769	320.4	3.82
1770	320.5	0.3
1771	320.6	0
1772	322.3	0
1773	322.4	3.88
1774	322.5	6.5
1775	322.6	4.52
1776	322.7	2.35
1777	322.8	1.1
1778	322.9	0.4
1779	323	0
1780	323.4	0
1781	323.5	11.99
1782	323.6	39.31
1783	323.7	78.5
1784	323.8	105.18
1785	323.9	123.73
1786	324	155.13
1787	324.1	200.24
1788	324.2	213.39
1789	324.3	161.51
1790	324.4	70.49
1791	324.5	8.61
1792	324.6	0
1793	324.7	0
1794	324.8	2.5
1795	324.9	14.36
1796	325	24.98
1797	325.1	35.06
1798	325.2	41.92
1799	325.3	37.85
1800	325.4	20.46
1801	325.5	0
1802	326	0
1803	326.1	4.02
1804	326.2	10.28
1805	326.3	4.7
1806	326.4	0
1807	326.5	0
1808	326.6	3.38
1809	326.7	14.65
1810	326.8	0
1811	327.2	0
1812	327.3	29.74
1813	327.4	15.21
1814	327.5	0
1815	327.8	0
1816	327.9	6.71
1817	328	10.89
1818	328.1	10.01
1819	328.2	7.84
1820	328.3	6.65
1821	328.4	5.45
1822	328.5	2.05
1823	328.6	0
1824	328.8	0
1825	328.9	1.52
1826	329	8.43
1827	329.1	13.31
1828	329.2	15.43
1829	329.3	15.08
1830	329.4	12.46
1831	329.5	10.6
1832	329.6	11.78
1833	329.7	13.19
1834	329.8	10.17
1835	329.9	1.47
1836	330	0
1837	330.2	0
1838	330.3	3.42
1839	330.4	2.92
1840	330.5	0
1841	331.6	0
1842	331.7	5.22
1843	331.8	10.42
1844	331.9	6.63
1845	332	0.56
1846	332.1	0
1847	332.2	0.58
1848	332.3	1.31
1849	332.4	0
1850	332.9	0
1851	333	0.67
1852	333.1	4.19
1853	333.2	0
1854	334.6	0
1855	334.7	2.47
1856	334.8	3.24
1857	334.9	5.93
1858	335	8.8
1859	335.1	6.5
1860	335.2	0
1861	335.5	0
1862	335.6	0.75
1863	335.7	0.12
1864	335.8	0
1865	336.2	0
1866	336.3	8.82
1867	336.4	18.28
1868	336.5	20.58
1869	336.6	13.98
1870	336.7	5.68
1871	336.8	4.11
1872	336.9	6.39
1873	337	5.02
1874	337.1	0
1875	337.6	0
1876	337.7	0.06
1877	337.8	0
1878	338.3	0
1879	338.4	9.53
1880	338.5	22.12
1881	338.6	21.92
1882	338.7	12.53
1883	338.8	3.05
1884	338.9	0
1885	339.3	0
1886	339.4	7.71
1887	339.5	9.39
1888	339.6	1.39
1889	339.7	0
1890	339.8	0
1891	339.9	0.77
1892	340	1.35
1893	340.1	0
1894	340.5	0
1895	340.6	13.98
1896	340.7	21.88
1897	340.8	11.29
1898	340.9	0
1899	341.3	0
1900	341.4	2.52
1901	341.5	7.31
1902	341.6	7.06
1903	341.7	3.28
1904	341.8	0
1905	342.2	0
1906	342.3	0.3
1907	342.4	0
1908	343.2	0
1909	343.3	3.89
1910	343.4	10.36
1911	343.5	14.47
1912	343.6	14.04
1913	343.7	8.15
1914	343.8	0
1915	344	0
1916	344.1	9.55
1917	344.2	17.77
1918	344.3	17.79
1919	344.4	15.29
1920	344.5	14.93
1921	344.6	12.82
1922	344.7	4.94
1923	344.8	0
1924	345.4	0
1925	345.5	4.7
1926	345.6	6.66
1927	345.7	7.8
1928	345.8	10.56
1929	345.9	11.97
1930	346	8.52
1931	346.1	2.42
1932	346.2	0
1933	346.3	0
1934	346.4	0.16
1935	346.5	7.63
1936	346.6	23.03
1937	346.7	44.49
1938	346.8	64.24
1939	346.9	70.82
1940	347	60.25
1941	347.1	39.05
1942	347.2	20.41
1943	347.3	12.76
1944	347.4	14.14
1945	347.5	19.98
1946	347.6	17.5
1947	347.7	4.51
1948	347.8	0
1949	347.9	0
1950	348	11.05
1951	348.1	13.96
1952	348.2	7.35
1953	348.3	0
1954	349.5	0
1955	349.6	5.25
1956	349.7	7.51
1957	349.8	6.82
1958	349.9	2.3
1959	350	0
1960	350.9	0
1961	351	8.8
1962	351.1	21.78
1963	351.2	20.32
1964	351.3	9.24
1965	351.4	1
1966	351.5	0
1967	352.2	0
1968	352.3	0.85
1969	352.4	4.24
1970	352.5	8.35
1971	352.6	11.82
1972	352.7	12.58
1973	352.8	10.38
1974	352.9	8.18
1975	353	8.66
1976	353.1	10.2
1977	353.2	8.84
1978	353.3	3.76
1979	353.4	0
1980	353.7	0
1981	353.8	0.99
1982	353.9	5.37
1983	354	7.25
1984	354.1	4.35
1985	354.2	3.22
1986	354.3	21.66
1987	354.4	53.07
1988	354.5	75.91
1989	354.6	74.5
1990	354.7	70.07
1991	354.8	72.33
1992	354.9	67.54
1993	355	45.49
1994	355.1	16.5
1995	355.2	0
1996	355.5	0
1997	355.6	0.29
[truncated: 1,595 more rows]

## Sheet: Sheet2
+ESI Scan (rt: 15.75-15.95 min, 43 scans) Frag=100.0V CF=0.000 DF=0.000 Blank-r003.d Subtract
Index	X	Y
0	50	1.04
1	50.1	1.17
2	50.2	0.56
3	50.3	0
4	50.4	0
5	50.5	0.07
6	50.6	0.46
7	50.7	0.58
8	50.8	0.44
9	50.9	0.17
10	51	0
11	51.1	0
12	51.2	0.08
13	51.3	0.07
14	51.4	0
15	51.7	0
16	51.8	0.04
17	51.9	0.39
18	52	0.87
19	52.1	1.09
20	52.2	0.78
21	52.3	0.27
22	52.4	0.03
23	52.5	0.17
24	52.6	0.26
25	52.7	0.02
26	52.8	0
27	53.2	0
28	53.3	0.24
29	53.4	0.35
30	53.5	0.31
31	53.6	0.16
32	53.7	0
33	54.2	0
34	54.3	0.24
35	54.4	1.05
36	54.5	1.67
37	54.6	0
38	55.2	0
39	55.3	14.85
40	55.4	21.56
41	55.5	15.25
42	55.6	4.72
43	55.7	0
44	55.9	0
45	56	2.21
46	56.1	3.91
47	56.2	3.9
48	56.3	2.03
49	56.4	0
50	56.5	0
51	56.6	1.97
52	56.7	1.25
53	56.8	0
54	58	0
55	58.1	19.94
56	58.2	41.26
57	58.3	53.82
58	58.4	42.2
59	58.5	0
60	59.7	0
61	59.8	68.46
62	59.9	126.92
63	60	114.66
64	60.1	35.77
65	60.2	0
66	62.5	0
67	62.6	0.28
68	62.7	0
69	63.1	0
70	63.2	0.54
71	63.3	0
72	63.8	0
73	63.9	13.38
74	64	15.1
75	64.1	5.68
76	64.2	0
77	64.5	0
78	64.6	0.38
79	64.7	0.22
80	64.8	0
81	64.9	0.11
82	65	0.78
83	65.1	1.24
84	65.2	1.19
85	65.3	0.74
86	65.4	0.15
87	65.5	0
88	66	0
89	66.1	0.09
90	66.2	0
91	66.4	0
92	66.5	0.55
93	66.6	1.1
94	66.7	0.96
95	66.8	0
96	67.7	0
97	67.8	0.21
98	67.9	0.36
99	68	0.26
100	68.1	0.04
101	68.2	0.12
102	68.3	0.89
103	68.4	1.88
104	68.5	1.28
105	68.6	0
106	69.4	0
107	69.5	0.07
108	69.6	4.79
109	69.7	4.77
110	69.8	6.48
111	69.9	7.28
112	70	6.72
113	70.1	5.32
114	70.2	3.86
115	70.3	3.04
116	70.4	0.93
117	70.5	0
118	71.7	0
119	71.8	2.1
120	71.9	6.06
121	72	3.28
122	72.1	2.92
123	72.2	6.97
124	72.3	4.93
125	72.4	0
126	73.6	0
127	73.7	16.55
128	73.8	39.06
129	73.9	77.82
130	74	72.21
131	74.1	76.68
132	74.2	85.07
133	74.3	70.64
134	74.4	32.78
135	74.5	0
136	74.6	0
137	74.7	0.87
138	74.8	11.12
139	74.9	2.76
140	75	0
141	75.3	0
142	75.4	1.82
143	75.5	4.14
144	75.6	0.89
145	75.7	0.49
146	75.8	0
147	76.1	0
148	76.2	0.3
149	76.3	1.78
150	76.4	2.76
151	76.5	3.66
152	76.6	6.49
153	76.7	14.62
154	76.8	27.72
155	76.9	38.85
156	77	38.49
157	77.1	25.99
158	77.2	8.59
159	77.3	0
160	77.7	0
161	77.8	1.01
162	77.9	1.54
163	78	1.05
164	78.1	1.07
165	78.2	2.18
166	78.3	3.78
167	78.4	4.81
168	78.5	4.56
169	78.6	2.33
170	78.7	0
171	79.5	0
172	79.6	2.9
173	79.7	11.75
174	79.8	22.45
175	79.9	31.09
176	80	43.84
177	80.1	71.97
178	80.2	103.76
179	80.3	104.13
180	80.4	59.67
181	80.5	11.75
182	80.6	0
183	81	0
184	81.1	80.43
185	81.2	208.04
186	81.3	268.96
187	81.4	221.18
188	81.5	96.53
189	81.6	0
190	81.8	0
191	81.9	5.71
192	82	18.72
193	82.1	31.6
194	82.2	38.98
195	82.3	30.25
196	82.4	12.15
197	82.5	2.47
198	82.6	3.9
199	82.7	0
200	83.1	0
201	83.2	2
202	83.3	3.8
203	83.4	0
204	83.7	0
205	83.8	6.03
206	83.9	12.97
207	84	8.8
208	84.1	0
209	84.2	0
210	84.3	9.77
211	84.4	19.07
212	84.5	14.74
213	84.6	0
214	85	0
215	85.1	20.79
216	85.2	38.32
217	85.3	38.05
218	85.4	22.89
219	85.5	7.8
220	85.6	0.64
221	85.7	0
222	86	0
223	86.1	0.53
224	86.2	2.84
225	86.3	6.61
226	86.4	10.32
227	86.5	9.69
228	86.6	0
229	87.5	0
230	87.6	11.21
231	87.7	8.2
232	87.8	1.6
233	87.9	0
234	88	0
235	88.1	9.47
236	88.2	26.34
237	88.3	32.75
238	88.4	32.38
239	88.5	26.11
240	88.6	0
241	90.2	0
242	90.3	7.13
243	90.4	11.33
244	90.5	11.6
245	90.6	31.77
246	90.7	67.99
247	90.8	92.69
248	90.9	77.4
249	91	28.7
250	91.1	0
251	91.2	0
252	91.3	11.39
253	91.4	30.58
254	91.5	21.28
255	91.6	0
256	92.9	0
257	93	1.57
258	93.1	4.35
259	93.2	5.46
260	93.3	4.79
261	93.4	2.9
262	93.5	1.04
263	93.6	0.06
264	93.7	0
265	94	0
266	94.1	0.22
267	94.2	0.39
268	94.3	0.29
269	94.4	0.64
270	94.5	0.96
271	94.6	0
272	95	0
273	95.1	8.83
274	95.2	9.59
275	95.3	6.26
276	95.4	6.93
277	95.5	9.06
278	95.6	6.75
279	95.7	0
280	96.1	0
281	96.2	0.54
282	96.3	2.65
283	96.4	0.36
284	96.5	0
285	98	0
286	98.1	7.23
287	98.2	0
288	100	0
289	100.1	35.93
290	100.2	72.5
291	100.3	70.69
292	100.4	51.99
293	100.5	9.77
294	100.6	0
295	101.4	0
296	101.5	30.01
297	101.6	92.44
298	101.7	145.02
299	101.8	209.79
300	101.9	269.24
301	102	250.74
302	102.1	127.11
303	102.2	0
304	102.6	0
305	102.7	30.14
306	102.8	42.4
307	102.9	0
308	103.7	0
309	103.8	10.66
310	103.9	75.48
311	104	97.8
312	104.1	69.94
313	104.2	34.35
314	104.3	21.18
315	104.4	24.44
316	104.5	18.61
317	104.6	13.48
318	104.7	0
319	105.5	0
320	105.6	16.39
321	105.7	17.89
322	105.8	0
323	105.9	0
324	106	24.27
325	106.1	74.87
326	106.2	99.18
327	106.3	80.63
328	106.4	44.59
329	106.5	10.74
330	106.6	0
331	107.3	0
332	107.4	13.01
333	107.5	37.87
334	107.6	43.05
335	107.7	29.46
336	107.8	15.19
337	107.9	1.7
338	108	0
339	108.5	0
340	108.6	25.65
341	108.7	61.21
342	108.8	47.98
343	108.9	11.9
344	109	4.03
345	109.1	55.91
346	109.2	137.15
347	109.3	164.55
348	109.4	115.14
349	109.5	34.54
350	109.6	0
351	109.9	0
352	110	10.85
353	110.1	13.49
354	110.2	8.52
355	110.3	1.9
356	110.4	0
357	111.2	0
358	111.3	45.58
359	111.4	101.76
360	111.5	88.82
361	111.6	55.46
362	111.7	27.92
363	111.8	8.72
364	111.9	0
365	112.4	0
366	112.5	2.97
367	112.6	17.37
368	112.7	45.64
369	112.8	87
370	112.9	124.88
371	113	145.1
372	113.1	126.35
373	113.2	58.43
374	113.3	0
375	115.4	0
376	115.5	5.51
377	115.6	34.82
378	115.7	30.61
379	115.8	0
380	116	0
381	116.1	82.52
382	116.2	181.27
383	116.3	149.84
384	116.4	43.3
385	116.5	0
386	116.6	0
387	116.7	38.93
388	116.8	78.43
389	116.9	96.08
390	117	79.35
391	117.1	24.38
392	117.2	0
393	118.3	0
394	118.4	1.31
395	118.5	0
396	119.2	0
397	119.3	24.64
398	119.4	28.79
399	119.5	17.28
400	119.6	7.27
401	119.7	1.99
402	119.8	0
403	120.9	0
404	121	18.23
405	121.1	0
406	121.5	0
407	121.6	2.41
408	121.7	0
409	121.9	0
410	122	48.44
411	122.1	39.43
412	122.2	0
413	123.1	0
414	123.2	1.19
415	123.3	1.03
416	123.4	0
417	124.3	0
418	124.4	41.81
419	124.5	56.85
420	124.6	33.68
421	124.7	16.35
422	124.8	21.63
423	124.9	43.35
424	125	45.63
425	125.1	11.5
426	125.2	0
427	126.1	0
428	126.2	9.91
429	126.3	0
430	126.4	0
431	126.5	6.22
432	126.6	68.47
433	126.7	144.74
434	126.8	173.74
435	126.9	123.8
436	127	42.34
437	127.1	0
438	127.3	0
439	127.4	2.35
440	127.5	25.04
441	127.6	35.72
442	127.7	41.76
443	127.8	52.94
444	127.9	59.86
445	128	58.23
446	128.1	69.81
447	128.2	112.8
448	128.3	152.49
449	128.4	132.05
450	128.5	51.33
451	128.6	0
452	129.3	0
453	129.4	33.45
454	129.5	90.41
455	129.6	126.08
456	129.7	133.66
457	129.8	115.17
458	129.9	73.54
459	130	16.53
460	130.1	0
461	130.4	0
462	130.5	43.74
463	130.6	63.83
464	130.7	4.19
465	130.8	0
466	131.4	0
467	131.5	4.87
468	131.6	17.46
469	131.7	19.92
470	131.8	15.69
471	131.9	0
472	132.6	0
473	132.7	7.49
474	132.8	20.5
475	132.9	4.79
476	133	0
477	133.7	0
478	133.8	2.67
479	133.9	0.93
480	134	0
481	134.2	0
482	134.3	1.82
483	134.4	21.23
484	134.5	34.67
485	134.6	33.35
486	134.7	31.06
487	134.8	43.27
488	134.9	65.37
489	135	71.89
490	135.1	56.59
491	135.2	40.54
492	135.3	44.69
493	135.4	70.7
494	135.5	77.36
495	135.6	33.69
496	135.7	0
497	135.8	0
498	135.9	0.93
499	136	7.75
500	136.1	0
501	136.2	0
502	136.3	29.16
503	136.4	69.6
504	136.5	80.89
505	136.6	16.42
506	136.7	0
507	137.3	0
508	137.4	59.58
509	137.5	80.25
510	137.6	12.74
511	137.7	0
512	137.8	0
513	137.9	2.15
514	138	1.11
515	138.1	0
516	138.6	0
517	138.7	75.23
518	138.8	126.98
519	138.9	110.86
520	139	36.69
521	139.1	0
522	139.2	0
523	139.3	62.8
524	139.4	106.68
525	139.5	51.21
526	139.6	0
527	140.3	0
528	140.4	47.57
529	140.5	44.07
530	140.6	12.75
531	140.7	2.55
532	140.8	2.78
533	140.9	11.66
534	141	25.84
535	141.1	34.22
536	141.2	14.42
537	141.3	0
538	141.5	0
539	141.6	18.29
540	141.7	63.55
541	141.8	103.02
542	141.9	98.75
543	142	44.51
544	142.1	0
545	142.4	0
546	142.5	0.53
547	142.6	57.3
548	142.7	91.14
549	142.8	72.64
550	142.9	2.92
551	143	0
552	143.7	0
553	143.8	3.3
554	143.9	15.2
555	144	13.24
556	144.1	0
557	144.2	0
558	144.3	5.39
559	144.4	53.84
560	144.5	124.65
561	144.6	155.61
562	144.7	86.65
563	144.8	0
564	145.5	0
565	145.6	5.88
566	145.7	0
567	147	0
568	147.1	21.42
569	147.2	68.23
570	147.3	69.72
571	147.4	52.4
572	147.5	37.35
573	147.6	46.4
574	147.7	60.15
575	147.8	66.92
576	147.9	62.02
577	148	54.09
578	148.1	59.81
579	148.2	63.24
580	148.3	38.79
581	148.4	5.66
582	148.5	7.65
583	148.6	0
584	149	0
585	149.1	42.3
586	149.2	19.27
587	149.3	0
588	150.3	0
589	150.4	22.35
590	150.5	19.65
591	150.6	0
592	150.8	0
593	150.9	21.92
594	151	21.77
595	151.1	1.13
596	151.2	0
597	151.4	0
598	151.5	6.4
599	151.6	38.14
600	151.7	61.75
601	151.8	59.3
602	151.9	35.06
603	152	3.33
604	152.1	0
605	152.2	0.11
606	152.3	46.33
607	152.4	114.83
608	152.5	178.54
609	152.6	193.7
610	152.7	155.14
611	152.8	83.12
612	152.9	0
613	153.5	0
614	153.6	26.73
615	153.7	0
616	154.2	0
617	154.3	21.7
618	154.4	51.53
619	154.5	67.37
620	154.6	77.09
621	154.7	77.2
622	154.8	62.45
623	154.9	45.04
624	155	39.28
625	155.1	28.41
626	155.2	2.38
627	155.3	0
628	155.6	0
629	155.7	10.59
630	155.8	31.36
631	155.9	39.72
632	156	40.14
633	156.1	36.88
634	156.2	31.29
635	156.3	20.51
636	156.4	13.24
637	156.5	11.66
638	156.6	9.01
639	156.7	4.92
640	156.8	11.22
641	156.9	31.28
642	157	49.48
643	157.1	45.44
644	157.2	32.57
645	157.3	32.31
646	157.4	49.04
647	157.5	66.3
648	157.6	69.24
649	157.7	55.4
650	157.8	33.51
651	157.9	9.93
652	158	0
653	158.1	0
654	158.2	16.32
655	158.3	34.97
656	158.4	30.17
657	158.5	8.84
658	158.6	0
659	159.2	0
660	159.3	25.12
661	159.4	36.01
662	159.5	22.01
663	159.6	4.88
664	159.7	0
665	159.8	2
666	159.9	11.09
667	160	22.41
668	160.1	28.75
669	160.2	21.87
670	160.3	0.13
671	160.4	0
672	161	0
673	161.1	36.52
674	161.2	25.9
675	161.3	0
676	161.6	0
677	161.7	15.02
678	161.8	27.32
679	161.9	44.35
680	162	50.95
681	162.1	38.74
682	162.2	8.96
683	162.3	0
684	163.8	0
685	163.9	5.56
686	164	15.97
687	164.1	25.65
688	164.2	27.48
689	164.3	15.13
690	164.4	0
691	166.6	0
692	166.7	14.76
693	166.8	57.11
694	166.9	68.1
695	167	18.87
696	167.1	0
697	167.3	0
698	167.4	16.43
699	167.5	29.98
700	167.6	21.84
701	167.7	8.74
702	167.8	0
703	168	0
704	168.1	5.16
705	168.2	7.97
706	168.3	9.06
707	168.4	14.81
708	168.5	24.72
709	168.6	31.63
710	168.7	31.95
711	168.8	29.69
712	168.9	28.35
713	169	25.04
714	169.1	17.05
715	169.2	7.97
716	169.3	0.98
717	169.4	0
718	169.6	0
719	169.7	0.08
720	169.8	6.98
721	169.9	0
722	170.1	0
723	170.2	3.04
724	170.3	28.59
725	170.4	37.44
726	170.5	40.2
727	170.6	31.97
728	170.7	0
729	171.1	0
730	171.2	6.58
731	171.3	8.85
732	171.4	3.74
733	171.5	5.82
734	171.6	9.58
735	171.7	2.44
736	171.8	0
737	172.1	0
738	172.2	8.2
739	172.3	11.57
740	172.4	2.21
741	172.5	0
742	172.8	0
743	172.9	33.38
744	173	93.19
745	173.1	114.72
746	173.2	86.36
747	173.3	39.48
748	173.4	7.69
749	173.5	0
750	174.3	0
751	174.4	2.4
752	174.5	0
753	174.8	0
754	174.9	3.21
755	175	0
756	175.2	0
757	175.3	4.31
758	175.4	11.79
759	175.5	0
760	176.5	0
761	176.6	3.88
762	176.7	11.23
763	176.8	7.89
764	176.9	0
765	179	0
766	179.1	2.27
767	179.2	0
768	179.7	0
769	179.8	10.38
770	179.9	30.41
771	180	31.76
772	180.1	15.57
773	180.2	0
774	180.5	0
775	180.6	9.91
776	180.7	16.58
777	180.8	15.89
778	180.9	14.02
779	181	17.71
780	181.1	20.42
781	181.2	11.24
782	181.3	0
783	181.4	0
784	181.5	0.58
785	181.6	6.27
786	181.7	3.17
787	181.8	0
788	183.2	0
789	183.3	5.18
790	183.4	12.02
791	183.5	8.72
792	183.6	0
793	184.2	0
794	184.3	7.59
795	184.4	16.06
796	184.5	13.77
797	184.6	0
798	185.4	0
799	185.5	8.59
800	185.6	33.26
801	185.7	52.98
802	185.8	59.09
803	185.9	47.59
804	186	25.56
805	186.1	3.96
806	186.2	0
807	186.5	0
808	186.6	1.98
809	186.7	0
810	187.3	0
811	187.4	4.51
812	187.5	12.29
813	187.6	11.03
814	187.7	3.35
815	187.8	0
816	188.1	0
817	188.2	0.56
818	188.3	0
819	188.7	0
820	188.8	0.99
821	188.9	10.69
822	189	11.85
823	189.1	6.78
824	189.2	1.12
825	189.3	0
826	190.2	0
827	190.3	2.5
828	190.4	15.11
829	190.5	24.62
830	190.6	20.72
831	190.7	1.82
832	190.8	0
833	191.4	0
834	191.5	7.04
835	191.6	18.26
836	191.7	18.16
837	191.8	4.07
838	191.9	0
839	193.3	0
840	193.4	21.92
841	193.5	25.98
842	193.6	16.94
843	193.7	11.13
844	193.8	8.21
845	193.9	0
846	194.2	0
847	194.3	11.98
848	194.4	5.37
849	194.5	0
850	194.7	0
851	194.8	8.89
852	194.9	7.42
853	195	0
854	195.1	0
855	195.2	7.5
856	195.3	28.9
857	195.4	29.49
858	195.5	12.71
859	195.6	7.4
860	195.7	8.45
861	195.8	8.92
862	195.9	1.51
863	196	0
864	196.1	0
865	196.2	5
866	196.3	20.38
867	196.4	26.75
868	196.5	24.23
869	196.6	19.3
870	196.7	16.02
871	196.8	12.73
872	196.9	7.56
873	197	0
874	198.2	0
875	198.3	4.23
876	198.4	6.97
877	198.5	0
878	199.1	0
879	199.2	13.14
880	199.3	14.5
881	199.4	3.67
882	199.5	0
883	199.8	0
884	199.9	0.05
885	200	4.67
886	200.1	5.21
887	200.2	3.51
888	200.3	4.06
889	200.4	8.51
890	200.5	12.55
891	200.6	11.17
892	200.7	5.75
893	200.8	2.34
894	200.9	2.75
895	201	1.87
896	201.1	0
897	201.4	0
898	201.5	0.34
899	201.6	2.71
900	201.7	3.6
901	201.8	1.85
902	201.9	0
903	202.4	0
904	202.5	1.8
905	202.6	2.85
906	202.7	0.73
907	202.8	0
908	203	0
909	203.1	4.3
910	203.2	13.75
911	203.3	16.5
912	203.4	10.53
913	203.5	1.22
914	203.6	0
915	203.8	0
916	203.9	6.82
917	204	14.32
918	204.1	2.85
919	204.2	0
920	206.5	0
921	206.6	31.92
922	206.7	32.45
923	206.8	0
924	207.1	0
925	207.2	9.3
926	207.3	42.71
927	207.4	26.01
928	207.5	0
929	208.9	0
930	209	27.84
931	209.1	36.67
932	209.2	19.06
933	209.3	0
934	209.4	0
935	209.5	1.8
936	209.6	12.08
937	209.7	13.5
938	209.8	6.94
939	209.9	0
940	210.1	0
941	210.2	3.73
942	210.3	9.36
943	210.4	11.72
944	210.5	10.34
945	210.6	8.9
946	210.7	10.24
947	210.8	11.56
948	210.9	7.03
949	211	0
950	211.2	0
951	211.3	11.48
952	211.4	27.58
953	211.5	31.97
954	211.6	23.49
955	211.7	13.11
956	211.8	8.87
957	211.9	6.15
958	212	0
959	213.7	0
960	213.8	8.34
961	213.9	18.6
962	214	16.06
963	214.1	1.98
964	214.2	0
965	214.3	0
966	214.4	3.35
967	214.5	9.33
968	214.6	6.69
969	214.7	0.55
970	214.8	0
971	214.9	0
972	215	1.53
973	215.1	1.46
974	215.2	0.45
975	215.3	0
976	215.5	0
977	215.6	4.6
978	215.7	28.39
979	215.8	49.27
980	215.9	48.42
981	216	27.6
982	216.1	5.75
983	216.2	0
984	216.4	0
985	216.5	0.98
986	216.6	0
987	217.1	0
988	217.2	16.55
989	217.3	25.98
990	217.4	22.04
991	217.5	9.24
992	217.6	0
993	217.7	0
994	217.8	1.76
995	217.9	0
996	218.4	0
997	218.5	1.29
998	218.6	0
999	219.1	0
1000	219.2	4.43
1001	219.3	2.38
1002	219.4	0
1003	219.5	0
1004	219.6	1.79
1005	219.7	0
1006	220.2	0
1007	220.3	8.39
1008	220.4	5.31
1009	220.5	4.97
1010	220.6	10.88
1011	220.7	18.57
1012	220.8	20.03
1013	220.9	8.66
1014	221	0
1015	221.3	0
1016	221.4	5.41
1017	221.5	2.43
1018	221.6	0
1019	223.4	0
1020	223.5	27.1
1021	223.6	29.32
1022	223.7	0
1023	224.2	0
1024	224.3	44.91
1025	224.4	39.03
1026	224.5	14.72
1027	224.6	10.75
1028	224.7	39.99
1029	224.8	85.01
1030	224.9	93.25
1031	225	55.23
1032	225.1	24.99
1033	225.2	36.89
1034	225.3	52.22
1035	225.4	36.63
1036	225.5	24.83
1037	225.6	33.48
1038	225.7	52.29
1039	225.8	42.34
1040	225.9	17.03
1041	226	0
1042	226.8	0
1043	226.9	13.68
1044	227	63.42
1045	227.1	112.19
1046	227.2	116.92
1047	227.3	70.42
1048	227.4	6.07
1049	227.5	0
1050	228.9	0
1051	229	2.09
1052	229.1	9.47
1053	229.2	10.25
1054	229.3	5.83
1055	229.4	0
1056	231.1	0
1057	231.2	0.06
1058	231.3	0.1
1059	231.4	0
1060	231.5	0
1061	231.6	0.57
1062	231.7	0.24
1063	231.8	0
1064	232.2	0
1065	232.3	0.9
1066	232.4	0.26
1067	232.5	0
1068	233.2	0
1069	233.3	3.79
1070	233.4	5
1071	233.5	3.81
1072	233.6	2.49
1073	233.7	0
1074	234.3	0
1075	234.4	0.32
1076	234.5	4.77
1077	234.6	4.85
1078	234.7	2.78
1079	234.8	0.12
1080	234.9	0
1081	235.1	0
1082	235.2	2.09
1083	235.3	4.92
1084	235.4	11.19
1085	235.5	17.17
1086	235.6	11.82
1087	235.7	0
1088	236.1	0
1089	236.2	5.66
1090	236.3	13.82
1091	236.4	9.51
1092	236.5	0.65
1093	236.6	0
1094	236.7	0
1095	236.8	1.87
1096	236.9	3.46
1097	237	2.53
1098	237.1	0
1099	237.4	0
1100	237.5	0.45
1101	237.6	5.38
1102	237.7	7.98
1103	237.8	5.15
1104	237.9	0
1105	238.2	0
1106	238.3	0.19
1107	238.4	0.9
1108	238.5	4.5
1109	238.6	9.38
1110	238.7	8.97
1111	238.8	1.36
1112	238.9	0
1113	240	0
1114	240.1	2.04
1115	240.2	3.06
1116	240.3	0
1117	241.1	0
1118	241.2	24.54
1119	241.3	34.55
1120	241.4	27.4
1121	241.5	14.04
1122	241.6	4.15
1123	241.7	0
1124	241.8	0
1125	241.9	7.46
1126	242	15.12
1127	242.1	15.23
1128	242.2	8.87
1129	242.3	3.53
1130	242.4	3.41
1131	242.5	5.75
1132	242.6	6.12
1133	242.7	3.24
1134	242.8	0
1135	243.1	0
1136	243.2	2.97
1137	243.3	11.78
1138	243.4	15.07
1139	243.5	8.43
1140	243.6	0
1141	244.6	0
1142	244.7	3.22
1143	244.8	4.57
1144	244.9	0
1145	246.3	0
1146	246.4	0.37
1147	246.5	3.53
1148	246.6	4.23
1149	246.7	3.37
1150	246.8	2.14
1151	246.9	0
1152	248.4	0
1153	248.5	0.41
1154	248.6	1.29
1155	248.7	0
1156	249.3	0
1157	249.4	7.73
1158	249.5	30.76
1159	249.6	69.57
1160	249.7	124.06
1161	249.8	178.05
1162	249.9	186.57
1163	250	174.05
1164	250.1	298.9
1165	250.2	1028.34
1166	250.3	3742.5
1167	250.4	8776.58
1168	250.5	15316.8
1169	250.6	21908.6
1170	250.7	27726.3
1171	250.8	32786.1
1172	250.9	36918.8
1173	251	38970.7
1174	251.1	37154
1175	251.2	30447.6
1176	251.3	20202.2
1177	251.4	10114.1
1178	251.5	3718.74
1179	251.6	1773.37
1180	251.7	2429.18
1181	251.8	3673.17
1182	251.9	4413.77
1183	252	4572.97
1184	252.1	4211.43
1185	252.2	3304.99
1186	252.3	2005.97
1187	252.4	823.44
1188	252.5	218.68
1189	252.6	182.09
1190	252.7	327.38
1191	252.8	464.31
1192	252.9	507.48
1193	253	506.05
1194	253.1	464.61
1195	253.2	351.95
1196	253.3	186.52
1197	253.4	37.34
1198	253.5	0
1199	253.6	0
1200	253.7	9.95
1201	253.8	21.66
1202	253.9	15.42
1203	254	6.83
1204	254.1	12.72
1205	254.2	30.58
1206	254.3	39.2
1207	254.4	28.65
1208	254.5	8.42
1209	254.6	0
1210	255.3	0
1211	255.4	4.6
1212	255.5	7.4
1213	255.6	5.57
1214	255.7	6.65
1215	255.8	7.16
1216	255.9	0.27
1217	256	0
1218	256.5	0
1219	256.6	8.36
1220	256.7	13.86
1221	256.8	11.89
1222	256.9	14.83
1223	257	27.5
1224	257.1	36.23
1225	257.2	29.37
1226	257.3	11.4
1227	257.4	0
1228	257.5	0
1229	257.6	1.02
1230	257.7	3.79
1231	257.8	3.53
1232	257.9	1.48
1233	258	0
1234	258.1	0.85
1235	258.2	4.64
1236	258.3	9.73
1237	258.4	13.44
1238	258.5	13.53
1239	258.6	9.29
1240	258.7	1.84
1241	258.8	0
1242	260.2	0
1243	260.3	0.08
1244	260.4	0
1245	260.5	0
1246	260.6	3.68
1247	260.7	13.19
1248	260.8	19.03
1249	260.9	16.44
1250	261	9.45
1251	261.1	4.22
1252	261.2	2.11
1253	261.3	0
1254	262.6	0
1255	262.7	10.97
1256	262.8	55.64
1257	262.9	70.08
1258	263	50.04
1259	263.1	22.92
1260	263.2	9.92
1261	263.3	5.56
1262	263.4	9.87
1263	263.5	15.35
1264	263.6	22.24
1265	263.7	26.59
1266	263.8	27.11
1267	263.9	26.93
1268	264	24.78
1269	264.1	19.48
1270	264.2	16.54
1271	264.3	16.98
1272	264.4	20.53
1273	264.5	18.71
1274	264.6	11.28
1275	264.7	2.13
1276	264.8	0
1277	266.7	0
1278	266.8	13.38
1279	266.9	45.32
1280	267	73.77
1281	267.1	86.81
1282	267.2	81.55
1283	267.3	78.94
1284	267.4	121.94
1285	267.5	240.38
1286	267.6	427.09
1287	267.7	650.35
1288	267.8	821.44
1289	267.9	889.48
1290	268	868.57
1291	268.1	760.15
1292	268.2	554.86
1293	268.3	301.37
1294	268.4	91.69
1295	268.5	14.63
1296	268.6	23.02
1297	268.7	55.29
1298	268.8	99.05
1299	268.9	133.97
1300	269	141.1
1301	269.1	115.04
1302	269.2	72.53
1303	269.3	32.4
1304	269.4	7.82
1305	269.5	0
1306	270.1	0
1307	270.2	6.99
1308	270.3	7.72
1309	270.4	0
1310	271.2	0
1311	271.3	1.29
1312	271.4	2.05
1313	271.5	0
1314	271.7	0
1315	271.8	2.49
1316	271.9	13.61
1317	272	13.81
1318	272.1	0.39
1319	272.2	0
1320	272.6	0
1321	272.7	13.82
1322	272.8	26.92
1323	272.9	41.76
1324	273	55.65
1325	273.1	60.04
1326	273.2	48.9
1327	273.3	27.14
1328	273.4	8.86
1329	273.5	0
1330	274.1	0
1331	274.2	2.81
1332	274.3	19.62
1333	274.4	33.09
1334	274.5	30.82
1335	274.6	11.54
1336	274.7	0
1337	275.1	0
1338	275.2	4.79
1339	275.3	7.17
1340	275.4	3.14
1341	275.5	0
1342	276.2	0
1343	276.3	0.89
1344	276.4	6.6
1345	276.5	14.12
1346	276.6	16.4
1347	276.7	3.13
1348	276.8	0
1349	277.9	0
1350	278	3.62
1351	278.1	13.37
1352	278.2	15.71
1353	278.3	4.91
1354	278.4	0
1355	278.7	0
1356	278.8	8.5
1357	278.9	0
1358	280.1	0
1359	280.2	14.35
1360	280.3	42.73
1361	280.4	79.06
1362	280.5	136.55
1363	280.6	145.86
1364	280.7	53.79
1365	280.8	0
1366	281.4	0
1367	281.5	38.14
1368	281.6	51.41
1369	281.7	10.91
1370	281.8	0
1371	281.9	0
1372	282	5.35
1373	282.1	0
1374	283.4	0
1375	283.5	14.72
1376	283.6	21.85
1377	283.7	20.49
1378	283.8	16.46
1379	283.9	15.8
1380	284	16.56
1381	284.1	8.25
1382	284.2	0
1383	285.2	0
1384	285.3	11.63
1385	285.4	16.94
1386	285.5	10.03
1387	285.6	0
1388	287.3	0
1389	287.4	3
1390	287.5	1.84
1391	287.6	0.51
1392	287.7	3.42
1393	287.8	10.5
1394	287.9	16.6
1395	288	16.21
1396	288.1	9.67
1397	288.2	2.29
1398	288.3	0
1399	288.7	0
1400	288.8	2.94
1401	288.9	3.61
1402	289	0
1403	289.4	0
1404	289.5	0.85
1405	289.6	1.71
1406	289.7	1.28
1407	289.8	0.12
1408	289.9	0
1409	290.7	0
1410	290.8	1.94
1411	290.9	2.27
1412	291	0
1413	292	0
1414	292.1	0.3
1415	292.2	0.84
1416	292.3	1.39
1417	292.4	1.38
1418	292.5	0.67
1419	292.6	0.15
1420	292.7	1.62
1421	292.8	5.62
1422	292.9	9.02
1423	293	5.8
1424	293.1	0
1425	294.7	0
1426	294.8	12.37
1427	294.9	17.82
1428	295	1.51
1429	295.1	0
1430	295.5	0
1431	295.6	5.57
1432	295.7	0
1433	296.4	0
1434	296.5	19.12
1435	296.6	115.03
1436	296.7	62.87
1437	296.8	0
1438	297.1	0
1439	297.2	76.24
1440	297.3	78.48
1441	297.4	1.83
1442	297.5	0
1443	297.7	0
1444	297.8	15.15
1445	297.9	63.45
1446	298	47.68
1447	298.1	0
1448	298.3	0
1449	298.4	52.27
1450	298.5	42.11
1451	298.6	7.85
1452	298.7	0
1453	299.2	0
1454	299.3	5.27
1455	299.4	11.45
1456	299.5	0.33
1457	299.6	2.87
1458	299.7	10.9
1459	299.8	11.74
1460	299.9	0
1461	300.3	0
1462	300.4	1.25
1463	300.5	66.66
1464	300.6	100.69
1465	300.7	49.74
1466	300.8	0
1467	301.7	0
1468	301.8	1.58
1469	301.9	11.61
1470	302	8.08
1471	302.1	0
1472	302.4	0
1473	302.5	2.38
1474	302.6	0.52
1475	302.7	0
1476	303.5	0
1477	303.6	3.53
1478	303.7	6.55
1479	303.8	8.44
1480	303.9	7.7
1481	304	4.06
1482	304.1	0
1483	304.4	0
1484	304.5	3.02
1485	304.6	8.06
1486	304.7	11.36
1487	304.8	11.05
1488	304.9	7.29
1489	305	1.69
1490	305.1	0
1491	305.4	0
1492	305.5	0.24
1493	305.6	0
1494	306	0
1495	306.1	6.05
1496	306.2	7.11
1497	306.3	3.13
1498	306.4	0
1499	306.5	0
1500	306.6	0.62
1501	306.7	1.44
1502	306.8	1.01
1503	306.9	0
1504	307.4	0
1505	307.5	0.55
1506	307.6	0
1507	307.9	0
1508	308	1.11
1509	308.1	1.1
1510	308.2	0
1511	308.6	0
1512	308.7	1.94
1513	308.8	2.97
1514	308.9	1.07
1515	309	11.21
1516	309.1	32.44
1517	309.2	45.81
1518	309.3	37.68
1519	309.4	17.67
1520	309.5	9.75
1521	309.6	21.81
1522	309.7	46.39
1523	309.8	76.86
1524	309.9	102.12
1525	310	123.47
1526	310.1	131.91
1527	310.2	111.37
1528	310.3	63.13
1529	310.4	14.6
1530	310.5	0
1531	311	0
1532	311.1	15.16
1533	311.2	22.63
1534	311.3	12.4
1535	311.4	0
1536	312	0
1537	312.1	29.73
1538	312.2	48.76
1539	312.3	42.67
1540	312.4	19.12
1541	312.5	0
1542	313.3	0
1543	313.4	0.39
1544	313.5	9.14
1545	313.6	21.77
1546	313.7	31.92
1547	313.8	27.08
1548	313.9	3.57
1549	314	0
1550	314.9	0
1551	315	16.19
1552	315.1	37.03
1553	315.2	39.76
1554	315.3	23.24
1555	315.4	4.13
1556	315.5	0
1557	316.2	0
1558	316.3	2.48
1559	316.4	3.18
1560	316.5	4.36
1561	316.6	4.13
1562	316.7	0
1563	317.4	0
1564	317.5	2.69
1565	317.6	12.82
1566	317.7	25.16
1567	317.8	30.19
1568	317.9	22.7
1569	318	10.39
1570	318.1	5.53
1571	318.2	9.06
1572	318.3	11.4
1573	318.4	7.47
1574	318.5	1.73
1575	318.6	0
1576	319	0
1577	319.1	5.15
1578	319.2	14.12
1579	319.3	17.13
1580	319.4	11.51
1581	319.5	3.05
1582	319.6	0
1583	319.7	0
1584	319.8	1.18
1585	319.9	2.35
1586	320	3.68
1587	320.1	6.6
1588	320.2	9.63
1589	320.3	9.44
1590	320.4	5.5
1591	320.5	1.36
1592	320.6	0
1593	321.2	0
1594	321.3	1.25
1595	321.4	0
1596	321.6	0
1597	321.7	8.14
1598	321.8	31.2
1599	321.9	53.25
1600	322	63.23
1601	322.1	64
1602	322.2	71.28
1603	322.3	77.46
1604	322.4	87.35
1605	322.5	112.93
1606	322.6	160.86
1607	322.7	210.89
1608	322.8	223.37
1609	322.9	210.62
1610	323	211.91
1611	323.1	239.21
1612	323.2	254.12
1613	323.3	212.76
1614	323.4	128.91
1615	323.5	56.26
1616	323.6	18.23
1617	323.7	27.87
1618	323.8	44.45
1619	323.9	58.59
1620	324	53.38
1621	324.1	34.24
1622	324.2	14.14
1623	324.3	1
1624	324.4	0
1625	324.9	0
1626	325	7.95
1627	325.1	42.09
1628	325.2	58.42
1629	325.3	50.34
1630	325.4	21.33
1631	325.5	0
1632	325.6	0
1633	325.7	0.89
1634	325.8	17.29
1635	325.9	22.13
1636	326	8.19
1637	326.1	0
1638	327.1	0
1639	327.2	43.56
1640	327.3	85.57
1641	327.4	30.65
1642	327.5	6.1
1643	327.6	10.43
1644	327.7	0
1645	328	0
1646	328.1	49.78
1647	328.2	65.15
1648	328.3	30.39
1649	328.4	0
1650	329.2	0
1651	329.3	3.18
1652	329.4	2.41
1653	329.5	0
1654	329.6	0
1655	329.7	1.04
1656	329.8	1.17
1657	329.9	1.3
1658	330	3.07
1659	330.1	4.39
1660	330.2	1.93
1661	330.3	0
1662	330.4	0
1663	330.5	2.15
1664	330.6	4.39
1665	330.7	0
1666	331.5	0
1667	331.6	0.85
1668	331.7	1.95
1669	331.8	3.27
1670	331.9	4.21
1671	332	3.28
1672	332.1	0.3
1673	332.2	0
1674	332.8	0
1675	332.9	10.39
1676	333	17.79
1677	333.1	2.97
1678	333.2	0
1679	333.7	0
1680	333.8	12.72
1681	333.9	32.17
1682	334	38.93
1683	334.1	27.99
1684	334.2	10.26
1685	334.3	0.84
1686	334.4	0
1687	335.1	0
1688	335.2	13.45
1689	335.3	17.46
1690	335.4	6.13
1691	335.5	0
1692	335.6	0
1693	335.7	3.38
1694	335.8	12.89
1695	335.9	14.88
1696	336	9.67
1697	336.1	3.88
1698	336.2	0
1699	337	0
1700	337.1	2.18
1701	337.2	10.93
1702	337.3	4.48
1703	337.4	0
1704	337.7	0
1705	337.8	12.23
1706	337.9	68.33
1707	338	71.3
1708	338.1	17.84
1709	338.2	0
1710	338.3	0
1711	338.4	5.62
1712	338.5	29.2
1713	338.6	33.21
1714	338.7	25.66
1715	338.8	28.88
1716	338.9	53.05
1717	339	76.83
1718	339.1	71.99
1719	339.2	34.47
1720	339.3	0
1721	339.6	0
1722	339.7	10.62
1723	339.8	28.19
1724	339.9	41.52
1725	340	39.95
1726	340.1	22.44
1727	340.2	0
1728	340.7	0
1729	340.8	4.39
1730	340.9	26.73
1731	341	36.46
1732	341.1	27.66
1733	341.2	5.16
1734	341.3	0
1735	341.7	0
1736	341.8	8.79
1737	341.9	14.49
1738	342	11.93
1739	342.1	7.75
1740	342.2	7.59
1741	342.3	8.44
1742	342.4	5.29
1743	342.5	0.52
1744	342.6	0
1745	342.7	0
1746	342.8	5.4
1747	342.9	20.39
1748	343	32.45
1749	343.1	23.92
1750	343.2	0
1751	343.5	0
1752	343.6	23.91
1753	343.7	33.24
1754	343.8	31.08
1755	343.9	25.76
1756	344	21.31
1757	344.1	14.3
1758	344.2	3.35
1759	344.3	0
1760	345	0
1761	345.1	9.45
1762	345.2	10.94
1763	345.3	8.26
1764	345.4	4.85
1765	345.5	0.4
1766	345.6	0
1767	346.3	0
1768	346.4	1.13
1769	346.5	6.09
1770	346.6	10.99
1771	346.7	13.02
1772	346.8	13.46
1773	346.9	11.16
1774	347	6.19
1775	347.1	1.84
1776	347.2	1.46
1777	347.3	3.21
1778	347.4	3.27
1779	347.5	1.31
1780	347.6	0
1781	348.5	0
1782	348.6	6.32
1783	348.7	0
1784	349.3	0
1785	349.4	2.71
1786	349.5	19.68
1787	349.6	20.89
1788	349.7	12.45
1789	349.8	0
1790	350.2	0
1791	350.3	1.95
1792	350.4	2.15
1793	350.5	3.13
1794	350.6	4.74
1795	350.7	7.62
1796	350.8	8.41
1797	350.9	4.94
1798	351	0
1799	351.2	0
1800	351.3	1.16
1801	351.4	3.87
1802	351.5	3.97
1803	351.6	1.51
1804	351.7	0
1805	352.7	0
1806	352.8	0.84
1807	352.9	13.55
1808	353	21.69
1809	353.1	19.32
1810	353.2	9.8
1811	353.3	1.11
1812	353.4	0
1813	353.9	0
1814	354	3.76
1815	354.1	5.19
1816	354.2	3.72
1817	354.3	7.29
1818	354.4	22.6
1819	354.5	39.2
1820	354.6	40.4
1821	354.7	21.83
1822	354.8	0
1823	355.4	0
1824	355.5	0.39
1825	355.6	4.75
1826	355.7	9.06
1827	355.8	15.23
1828	355.9	17.64
1829	356	11.7
1830	356.1	2.23
1831	356.2	0
1832	356.7	0
1833	356.8	6.48
1834	356.9	39.04
1835	357	36.77
1836	357.1	18.58
1837	357.2	17.43
1838	357.3	35.56
1839	357.4	42.27
1840	357.5	26.43
1841	357.6	6.18
1842	357.7	0
1843	359	0
1844	359.1	8.93
1845	359.2	10.81
1846	359.3	4.01
1847	359.4	0
1848	359.5	0
1849	359.6	2.11
1850	359.7	6.51
1851	359.8	8.35
1852	359.9	4.35
1853	360	0
1854	360.3	0
1855	360.4	6.68
1856	360.5	11.56
1857	360.6	12.28
1858	360.7	8.24
1859	360.8	1.68
1860	360.9	0
1861	361.5	0
1862	361.6	2.77
1863	361.7	7.25
1864	361.8	7.14
1865	361.9	0.94
1866	362	0
1867	362.8	0
1868	362.9	4.35
1869	363	4.01
1870	363.1	0.76
1871	363.2	0
1872	363.3	0.8
1873	363.4	0.93
1874	363.5	0
1875	363.7	0
1876	363.8	14.97
1877	363.9	36.41
1878	364	43.91
1879	364.1	29.92
1880	364.2	6.59
1881	364.3	0
1882	365	0
1883	365.1	11.16
1884	365.2	10.7
1885	365.3	1.66
1886	365.4	0
1887	366.6	0
1888	366.7	1.97
1889	366.8	9.79
1890	366.9	21.45
1891	367	32.91
1892	367.1	36.27
1893	367.2	28
1894	367.3	13.39
1895	367.4	0.98
1896	367.5	0
1897	367.7	0
1898	367.8	16.33
1899	367.9	40.67
1900	368	47.12
1901	368.1	29.87
1902	368.2	8.08
1903	368.3	1.26
1904	368.4	4.95
1905	368.5	6.59
1906	368.6	3.1
1907	368.7	0
1908	369.5	0
1909	369.6	5.6
1910	369.7	22.24
1911	369.8	12.91
1912	369.9	0
1913	370	0
1914	370.1	0.34
1915	370.2	64.31
1916	370.3	177.19
1917	370.4	312.67
1918	370.5	396.93
1919	370.6	353.15
1920	370.7	196.26
1921	370.8	46.94
1922	370.9	67.7
1923	371	225.98
1924	371.1	276.21
1925	371.2	72.95
1926	371.3	0
1927	372	0
1928	372.1	37.99
1929	372.2	157.9
1930	372.3	204.33
1931	372.4	195.97
1932	372.5	128.7
1933	372.6	13.42
1934	372.7	0
1935	372.8	0
1936	372.9	23.16
1937	373	105.46
1938	373.1	111.34
1939	373.2	85.25
1940	373.3	60.33
1941	373.4	27.01
1942	373.5	0
1943	373.9	0
1944	374	1.62
1945	374.1	0
1946	374.2	0
1947	374.3	2.45
1948	374.4	20.03
1949	374.5	23.13
1950	374.6	0
1951	375.2	0
1952	375.3	43.91
1953	375.4	38.4
1954	375.5	0.16
1955	375.6	0
1956	376.5	0
1957	376.6	2.72
1958	376.7	9.47
1959	376.8	7.9
1960	376.9	0
1961	377.7	0
1962	377.8	2.62
1963	377.9	18.81
1964	378	22.12
1965	378.1	3.79
1966	378.2	0
1967	379.8	0
1968	379.9	5.07
1969	380	7.56
1970	380.1	8.21
1971	380.2	6.17
1972	380.3	3.18
1973	380.4	0.7
1974	380.5	0
1975	380.6	0
1976	380.7	0.05
1977	380.8	16.21
1978	380.9	38.69
1979	381	51.28
1980	381.1	45.77
1981	381.2	29.73
1982	381.3	13.77
1983	381.4	0
1984	381.8	0
1985	381.9	0.79
1986	382	1.97
1987	382.1	1.37
1988	382.2	0.73
1989	382.3	1.54
1990	382.4	4.47
1991	382.5	10.13
1992	382.6	18.2
1993	382.7	27.63
1994	382.8	31.26
1995	382.9	21.83
1996	383	2.79
1997	383.1	0
[truncated: 1,362 more rows]

## Sheet: Sheet3
+ESI Scan (rt: 16.67-16.89 min, 48 scans) Frag=100.0V CF=0.000 DF=0.000 Blank-r003.d Subtract
Index	X	Y
0	50	0.69
1	50.1	1.07
2	50.2	1
3	50.3	0.4
4	50.4	0
5	51	0
6	51.1	0.31
7	51.2	0.25
8	51.3	0
9	51.5	0
10	51.6	0.08
11	51.7	0.41
12	51.8	0.45
13	51.9	0.46
14	52	0.53
15	52.1	0.53
16	52.2	0.32
17	52.3	0
18	52.6	0
19	52.7	0.02
20	52.8	0
21	53	0
22	53.1	0.03
23	53.2	0.26
24	53.3	0.33
25	53.4	0.33
26	53.5	0.42
27	53.6	0.49
28	53.7	0.4
29	53.8	0.24
30	53.9	0.19
31	54	0.16
32	54.1	0
33	54.4	0
34	54.5	0.03
35	54.6	0
36	55.7	0
37	55.8	0.06
38	55.9	0
39	56	0
40	56.1	0.03
41	56.2	0.41
42	56.3	0.08
43	56.4	0
44	56.7	0
45	56.8	3.8
46	56.9	8.92
47	57	2.66
48	57.1	0
49	57.4	0
50	57.5	8.39
51	57.6	10.13
52	57.7	0
53	58.2	0
54	58.3	11.05
55	58.4	33.36
56	58.5	22.25
57	58.6	0
58	58.9	0
59	59	27.97
60	59.1	43.38
61	59.2	49.4
62	59.3	50.25
63	59.4	44.62
64	59.5	36.55
65	59.6	26.29
66	59.7	15.05
67	59.8	2.49
68	59.9	0
69	60	7.6
70	60.1	19.58
71	60.2	30.67
72	60.3	41.55
73	60.4	49.12
74	60.5	42.03
75	60.6	20.05
76	60.7	0
77	61.2	0
78	61.3	14.69
79	61.4	35.47
80	61.5	32.82
81	61.6	15.71
82	61.7	1.55
83	61.8	0
84	62.4	0
85	62.5	0.08
86	62.6	0.15
87	62.7	0.45
88	62.8	0.32
89	62.9	0
90	63.4	0
91	63.5	1.2
92	63.6	1.45
93	63.7	0
94	64.1	0
95	64.2	7.75
96	64.3	15.04
97	64.4	16.62
98	64.5	12.89
99	64.6	7.29
100	64.7	2.7
101	64.8	0
102	65.1	0
103	65.2	0.49
104	65.3	0.67
105	65.4	0.33
106	65.5	0
107	65.9	0
108	66	0.21
109	66.1	0.28
110	66.2	0.22
111	66.3	0.21
112	66.4	0.25
113	66.5	0.25
114	66.6	0.31
115	66.7	0.58
116	66.8	0.99
117	66.9	1.33
118	67	1.47
119	67.1	1.31
120	67.2	0.84
121	67.3	0.22
122	67.4	0
123	67.9	0
124	68	0.46
125	68.1	0.74
126	68.2	0.97
127	68.3	1.24
128	68.4	1.36
129	68.5	1.08
130	68.6	0.57
131	68.7	0.3
132	68.8	0.62
133	68.9	1.46
134	69	2.41
135	69.1	3.06
136	69.2	3.16
137	69.3	2.71
138	69.4	1.76
139	69.5	0.15
140	69.6	0
141	70.2	0
142	70.3	0.48
143	70.4	0
144	70.6	0
145	70.7	10.51
146	70.8	33.92
147	70.9	55.61
148	71	59.02
149	71.1	43.27
150	71.2	24.53
151	71.3	17.91
152	71.4	14.73
153	71.5	10.46
154	71.6	2.81
155	71.7	0
156	72	0
157	72.1	0.25
158	72.2	1.01
159	72.3	0
160	72.4	0
161	72.5	8.31
162	72.6	26.68
163	72.7	40.65
164	72.8	63.37
165	72.9	95.34
166	73	116.58
167	73.1	103.41
168	73.2	75.34
169	73.3	69.58
170	73.4	77.57
171	73.5	67.75
172	73.6	31.28
173	73.7	1.04
174	73.8	0
175	74.2	0
176	74.3	0.02
177	74.4	2.1
178	74.5	1.49
179	74.6	0.69
180	74.7	0.45
181	74.8	0.39
182	74.9	0.92
183	75	2.4
184	75.1	3.87
185	75.2	3.97
186	75.3	2.6
187	75.4	1.01
188	75.5	0.41
189	75.6	0.61
190	75.7	0.49
191	75.8	0
192	76	0
193	76.1	1.28
194	76.2	1.76
195	76.3	0.76
196	76.4	0.18
197	76.5	2.5
198	76.6	8.6
199	76.7	22.25
200	76.8	50.4
201	76.9	87.73
202	77	115.09
203	77.1	117.7
204	77.2	100.07
205	77.3	75.48
206	77.4	47.6
207	77.5	21.27
208	77.6	1.75
209	77.7	0
210	77.8	0
211	77.9	4.87
212	78	7.29
213	78.1	5.84
214	78.2	2.26
215	78.3	0.8
216	78.4	4.56
217	78.5	11.66
218	78.6	16.24
219	78.7	13.83
220	78.8	7.66
221	78.9	5.67
222	79	14.51
223	79.1	26.98
224	79.2	31.69
225	79.3	26.51
226	79.4	18.49
227	79.5	12.78
228	79.6	8.65
229	79.7	2.55
230	79.8	0
231	80.2	0
232	80.3	4.91
233	80.4	7.07
234	80.5	0
235	81.4	0
236	81.5	24.73
237	81.6	19.54
238	81.7	0.62
239	81.8	0
240	81.9	0
241	82	12.82
242	82.1	20.54
243	82.2	17.46
244	82.3	7.74
245	82.4	0
246	83.1	0
247	83.2	2.5
248	83.3	2.33
249	83.4	0
250	84	0
251	84.1	0.56
252	84.2	2.09
253	84.3	2.16
254	84.4	2.05
255	84.5	1.43
256	84.6	0
257	84.8	0
258	84.9	2.11
259	85	11.91
260	85.1	18.71
261	85.2	18.75
262	85.3	13.37
263	85.4	6.57
264	85.5	1.59
265	85.6	0
266	86.7	0
267	86.8	9.8
268	86.9	19.22
269	87	17.03
270	87.1	6.1
271	87.2	0
272	87.6	0
273	87.7	0.48
274	87.8	0.05
275	87.9	0
276	88.3	0
277	88.4	7.78
278	88.5	3.31
279	88.6	0
280	88.8	0
281	88.9	46.37
282	89	62.66
283	89.1	3.82
284	89.2	0
285	89.6	0
286	89.7	13.95
287	89.8	19.54
288	89.9	14.25
289	90	3.81
290	90.1	0
291	90.4	0
292	90.5	4.8
293	90.6	14.39
294	90.7	19.33
295	90.8	18.3
296	90.9	14.77
297	91	11.32
298	91.1	6.88
299	91.2	0.8
300	91.3	0
301	91.5	0
302	91.6	0.67
303	91.7	2
304	91.8	1.9
305	91.9	1.63
306	92	1.71
307	92.1	1.6
308	92.2	0.83
309	92.3	0
310	92.5	0
311	92.6	0.37
312	92.7	0.08
313	92.8	0
314	92.9	0.19
315	93	3.16
316	93.1	6.71
317	93.2	8.11
318	93.3	6.5
319	93.4	3.59
320	93.5	1.47
321	93.6	0.78
322	93.7	0.85
323	93.8	0.87
324	93.9	0.65
325	94	0.46
326	94.1	0.39
327	94.2	0.15
328	94.3	0
329	94.5	0
330	94.6	0.26
331	94.7	0.53
332	94.8	0.55
333	94.9	1.12
334	95	1.54
335	95.1	0
336	95.6	0
337	95.7	3.18
338	95.8	2.83
339	95.9	0.93
340	96	0
341	96.1	0
342	96.2	1.97
343	96.3	7.29
344	96.4	11.03
345	96.5	9.73
346	96.6	4.17
347	96.7	0
348	96.9	0
349	97	2.46
350	97.1	3.62
351	97.2	0
352	97.6	0
353	97.7	9.07
354	97.8	21.86
355	97.9	35.44
356	98	38.33
357	98.1	29.65
358	98.2	20.73
359	98.3	19.85
360	98.4	20.68
361	98.5	26.89
362	98.6	44.67
363	98.7	56.99
364	98.8	43.97
365	98.9	21.75
366	99	15.66
367	99.1	38.04
368	99.2	65.04
369	99.3	64.44
370	99.4	33.25
371	99.5	0
372	99.6	0
373	99.7	12.4
374	99.8	48.75
375	99.9	54.12
376	100	22.16
377	100.1	0
378	100.2	0
379	100.3	2.78
380	100.4	19.25
381	100.5	11.21
382	100.6	0
383	101	0
384	101.1	42.52
385	101.2	32.89
386	101.3	0
387	102.2	0
388	102.3	25.27
389	102.4	44.81
390	102.5	2.99
391	102.6	0
392	102.7	0
393	102.8	0.35
394	102.9	28.75
395	103	29.19
396	103.1	0
397	104.2	0
398	104.3	38.8
399	104.4	102.6
400	104.5	127.35
401	104.6	198.3
402	104.7	315.87
403	104.8	430.1
404	104.9	498.25
405	105	508.33
406	105.1	473.02
407	105.2	394.03
408	105.3	270.63
409	105.4	139.17
410	105.5	49.47
411	105.6	25.14
412	105.7	55.94
413	105.8	78.78
414	105.9	53.1
415	106	0
416	106.4	0
417	106.5	4.28
418	106.6	0
419	107.1	0
420	107.2	4.21
421	107.3	23.7
422	107.4	42.56
423	107.5	36.26
424	107.6	0
425	108	0
426	108.1	56.09
427	108.2	108.21
428	108.3	102.92
429	108.4	54.44
430	108.5	10.9
431	108.6	9.11
432	108.7	25.04
433	108.8	24.04
434	108.9	8.37
435	109	6.85
436	109.1	36.44
437	109.2	69.71
438	109.3	67.57
439	109.4	35.17
440	109.5	10.06
441	109.6	8.69
442	109.7	12.25
443	109.8	11.66
444	109.9	0.64
445	110	0
446	110.1	0
447	110.2	2.01
448	110.3	19.74
449	110.4	17.82
450	110.5	8.44
451	110.6	19.76
452	110.7	19.24
453	110.8	0
454	112.1	0
455	112.2	7.16
456	112.3	20.05
457	112.4	16.69
458	112.5	0.92
459	112.6	0
460	113.1	0
461	113.2	43.84
462	113.3	109.05
463	113.4	160.31
464	113.5	164.59
465	113.6	143.07
466	113.7	79.18
467	113.8	0
468	115.4	0
469	115.5	57.69
470	115.6	105.68
471	115.7	59.33
472	115.8	0
473	115.9	0
474	116	15.15
475	116.1	147.99
476	116.2	232.29
477	116.3	265.11
478	116.4	267.27
479	116.5	228.72
480	116.6	133.84
481	116.7	58.96
482	116.8	29.31
483	116.9	0
484	118	0
485	118.1	3.83
486	118.2	5.21
487	118.3	2.2
488	118.4	2.18
489	118.5	8.61
490	118.6	17.51
491	118.7	25.53
492	118.8	29.63
493	118.9	24.52
494	119	13.41
495	119.1	6.58
496	119.2	7.86
497	119.3	9.45
498	119.4	5.51
499	119.5	0
500	119.7	0
501	119.8	1.33
502	119.9	1.89
503	120	0.87
504	120.1	0
505	120.8	0
506	120.9	0.92
507	121	7.56
508	121.1	30.87
509	121.2	65.78
510	121.3	91.73
511	121.4	82.26
512	121.5	27.43
513	121.6	0
514	122.1	0
515	122.2	27.91
516	122.3	18.32
517	122.4	1.91
518	122.5	0
519	122.6	0
520	122.7	7.38
521	122.8	26.7
522	122.9	14.76
523	123	0
524	123.2	0
525	123.3	46.45
526	123.4	89.62
527	123.5	89.44
528	123.6	25.82
529	123.7	0
530	124.4	0
531	124.5	23.56
532	124.6	62.45
533	124.7	64.4
534	124.8	50.16
535	124.9	56.57
536	125	95.07
537	125.1	140.2
538	125.2	154.24
539	125.3	126.3
540	125.4	73.29
541	125.5	11.31
542	125.6	0
543	126.1	0
544	126.2	14.84
545	126.3	33.04
546	126.4	45.56
547	126.5	54.59
548	126.6	50.06
549	126.7	23.47
550	126.8	0
551	127	0
552	127.1	1.52
553	127.2	38.75
554	127.3	41.79
555	127.4	20.56
556	127.5	36.9
557	127.6	83.79
558	127.7	100.24
559	127.8	19.39
560	127.9	0
561	128.3	0
562	128.4	8.01
563	128.5	0
564	128.6	0
565	128.7	16.29
566	128.8	2.89
567	128.9	0
568	131.4	0
569	131.5	0.93
570	131.6	1.13
571	131.7	2.7
572	131.8	6.92
573	131.9	6.59
574	132	0
575	132.2	0
576	132.3	20.38
577	132.4	99.17
578	132.5	207.52
579	132.6	320.55
580	132.7	398.61
581	132.8	412.53
582	132.9	369.07
583	133	307.97
584	133.1	252.53
585	133.2	188.82
586	133.3	106.16
587	133.4	32.02
588	133.5	0
589	133.6	0.02
590	133.7	0.37
591	133.8	0
592	134.6	0
593	134.7	14.32
594	134.8	36.8
595	134.9	43.24
596	135	25.16
597	135.1	0
598	135.4	0
599	135.5	59.54
600	135.6	90.04
601	135.7	49.79
602	135.8	0
603	136.1	0
604	136.2	61.52
605	136.3	117.4
606	136.4	72.49
607	136.5	0
608	136.7	0
609	136.8	51.06
610	136.9	232.76
611	137	311.28
612	137.1	212.21
613	137.2	24.52
614	137.3	0
615	137.6	0
616	137.7	2.75
617	137.8	8.54
618	137.9	15.26
619	138	11.55
620	138.1	1.21
621	138.2	0
622	138.6	0
623	138.7	4.9
624	138.8	39.25
625	138.9	52.68
626	139	31.07
627	139.1	0
628	139.2	0
629	139.3	12.43
630	139.4	47.67
631	139.5	94.39
632	139.6	174.99
633	139.7	290.34
634	139.8	395.13
635	139.9	431.85
636	140	398.92
637	140.1	339.64
638	140.2	300.72
639	140.3	252.68
640	140.4	176.17
641	140.5	80.37
642	140.6	1.71
643	140.7	0
644	141	0
645	141.1	0.71
646	141.2	44.87
647	141.3	50.24
648	141.4	17.99
649	141.5	0
650	141.7	0
651	141.8	6.98
652	141.9	4.17
653	142	0
654	142.2	0
655	142.3	2.89
656	142.4	0
657	142.6	0
658	142.7	2.93
659	142.8	22.23
660	142.9	42.91
661	143	55.07
662	143.1	49.34
663	143.2	24.23
664	143.3	0
665	143.5	0
666	143.6	28.26
667	143.7	41.38
668	143.8	26.44
669	143.9	1.76
670	144	0
671	144.1	1.49
672	144.2	14.4
673	144.3	0
674	144.7	0
675	144.8	138.42
676	144.9	168.23
677	145	94.56
678	145.1	0
679	146.5	0
680	146.6	47.26
681	146.7	132.4
682	146.8	148.13
683	146.9	68.31
684	147	0
685	147.4	0
686	147.5	24.21
687	147.6	35.09
688	147.7	28.69
689	147.8	18.85
690	147.9	8.83
691	148	0
692	149.1	0
693	149.2	47.44
694	149.3	103.47
695	149.4	47.62
696	149.5	0
697	149.6	0
698	149.7	32.24
699	149.8	55.97
700	149.9	0
701	150.1	0
702	150.2	18.73
703	150.3	229.98
704	150.4	460.78
705	150.5	717.1
706	150.6	1005.17
707	150.7	1268.33
708	150.8	1371.77
709	150.9	1261.79
710	151	1071.04
711	151.1	934.35
712	151.2	806.95
713	151.3	576.74
714	151.4	278.41
715	151.5	75.26
716	151.6	8.87
717	151.7	21.35
718	151.8	55.27
719	151.9	77.61
720	152	80.47
721	152.1	69.93
722	152.2	56.01
723	152.3	67.57
724	152.4	90.81
725	152.5	97.78
726	152.6	76.24
727	152.7	55.45
728	152.8	55.03
729	152.9	59.4
730	153	51.58
731	153.1	38.47
732	153.2	46.39
733	153.3	65.88
734	153.4	56.6
735	153.5	10.03
736	153.6	0
737	154	0
738	154.1	15.39
739	154.2	23.94
740	154.3	0
741	155.2	0
742	155.3	4.91
743	155.4	26.45
744	155.5	40.29
745	155.6	34.39
746	155.7	17.05
747	155.8	0
748	156.5	0
749	156.6	19.85
750	156.7	53.25
751	156.8	58.23
752	156.9	25.46
753	157	0
754	157.3	0
755	157.4	46.74
756	157.5	103.41
757	157.6	152.6
758	157.7	190.88
759	157.8	216.82
760	157.9	221.26
761	158	197.05
762	158.1	146.33
763	158.2	81.57
764	158.3	24.58
765	158.4	12.32
766	158.5	37.07
767	158.6	66.58
768	158.7	65.39
769	158.8	39.75
770	158.9	4.97
771	159	0
772	159.5	0
773	159.6	0.13
774	159.7	0.96
775	159.8	2.69
776	159.9	8.68
777	160	19.1
778	160.1	29.04
779	160.2	30.71
780	160.3	20.46
781	160.4	6.03
782	160.5	0.01
783	160.6	15.1
784	160.7	40.51
785	160.8	52.65
786	160.9	40
787	161	15.95
788	161.1	1.42
789	161.2	0
790	161.7	0
791	161.8	6.65
792	161.9	16.53
793	162	24.15
794	162.1	21.84
795	162.2	9.27
796	162.3	2.25
797	162.4	7.29
798	162.5	19
799	162.6	25.62
800	162.7	25.49
801	162.8	9.31
802	162.9	0
803	163.4	0
804	163.5	2.6
805	163.6	7.53
806	163.7	12.43
807	163.8	8.44
808	163.9	0
809	166.4	0
810	166.5	5.45
811	166.6	18.77
812	166.7	4.01
813	166.8	0
814	167	0
815	167.1	23.19
816	167.2	58.35
817	167.3	49.75
818	167.4	20.71
819	167.5	1.76
820	167.6	0.16
821	167.7	0
822	168.3	0
823	168.4	8.69
824	168.5	21.91
825	168.6	17.76
826	168.7	3.06
827	168.8	0
828	169	0
829	169.1	8.82
830	169.2	10.51
831	169.3	3.02
832	169.4	0
833	169.5	0
834	169.6	10.35
835	169.7	28.85
836	169.8	45.21
837	169.9	52.15
838	170	45.44
839	170.1	26.21
840	170.2	1.76
841	170.3	0
842	170.5	0
843	170.6	4.78
844	170.7	22.44
845	170.8	26.64
846	170.9	17.84
847	171	9.4
848	171.1	11.6
849	171.2	20.01
850	171.3	24.88
851	171.4	21.21
852	171.5	8.89
853	171.6	0
854	171.8	0
855	171.9	24.14
856	172	58.14
857	172.1	59.73
858	172.2	22.58
859	172.3	0
860	174.1	0
861	174.2	5.56
862	174.3	33.16
863	174.4	82.25
864	174.5	149.7
865	174.6	201.31
866	174.7	170.4
867	174.8	62.04
868	174.9	0
869	175	35.75
870	175.1	162.78
871	175.2	190.62
872	175.3	89.49
873	175.4	0
874	175.6	0
875	175.7	5.44
876	175.8	0
877	176.1	0
878	176.2	1.76
879	176.3	0.43
880	176.4	0
881	177.6	0
882	177.7	15.38
883	177.8	24.4
884	177.9	8.59
885	178	0
886	178.2	0
887	178.3	4.62
888	178.4	17.51
889	178.5	26.06
890	178.6	24.07
891	178.7	9.6
892	178.8	0
893	179.3	0
894	179.4	6.51
895	179.5	24.96
896	179.6	51.81
897	179.7	81.62
898	179.8	99.93
899	179.9	101.36
900	180	86.62
901	180.1	60.48
902	180.2	32.07
903	180.3	10.44
904	180.4	6.59
905	180.5	21.68
906	180.6	36.9
907	180.7	30.64
908	180.8	1.82
909	180.9	0
910	182.1	0
911	182.2	24.66
912	182.3	72.4
913	182.4	136.11
914	182.5	160.57
915	182.6	95.92
916	182.7	0
917	183.4	0
918	183.5	38.07
919	183.6	56.05
920	183.7	36.05
921	183.8	18.82
922	183.9	29.7
923	184	57.55
924	184.1	67.69
925	184.2	46.57
926	184.3	15.22
927	184.4	0
928	184.7	0
929	184.8	0.61
930	184.9	19.27
931	185	19.9
932	185.1	3.71
933	185.2	0
934	186.2	0
935	186.3	11.32
936	186.4	12.97
937	186.5	9.88
938	186.6	4.23
939	186.7	0
940	187.5	0
941	187.6	4.87
942	187.7	8.56
943	187.8	8.27
944	187.9	5.15
945	188	3.1
946	188.1	5.25
947	188.2	9.35
948	188.3	12.03
949	188.4	14.26
950	188.5	15.4
951	188.6	6.93
952	188.7	0
953	189.6	0
954	189.7	1.16
955	189.8	4.24
956	189.9	4.51
957	190	3.84
958	190.1	4.38
959	190.2	5.03
960	190.3	3.63
961	190.4	0.91
962	190.5	0
963	190.7	0
964	190.8	3.55
965	190.9	7.77
966	191	4.85
967	191.1	0
968	192.3	0
969	192.4	4.15
970	192.5	3.71
971	192.6	0
972	193.1	0
973	193.2	2.89
974	193.3	6.23
975	193.4	10.65
976	193.5	14.51
977	193.6	10.37
978	193.7	1.41
979	193.8	1.66
980	193.9	10.45
981	194	9.37
982	194.1	0
983	194.5	0
984	194.6	5.81
985	194.7	23.66
986	194.8	27.88
987	194.9	14.3
988	195	0
989	195.3	0
990	195.4	6.64
991	195.5	22.09
992	195.6	12.88
993	195.7	3.95
994	195.8	2.1
995	195.9	5.25
996	196	8.26
997	196.1	11.33
998	196.2	16.59
999	196.3	21.93
1000	196.4	22.33
1001	196.5	15.98
1002	196.6	7.38
1003	196.7	2.12
1004	196.8	0
1005	198.3	0
1006	198.4	1.94
1007	198.5	5.97
1008	198.6	7.5
1009	198.7	9.71
1010	198.8	9.04
1011	198.9	0
1012	199.8	0
1013	199.9	0.95
1014	200	2.4
1015	200.1	2.63
1016	200.2	3.99
1017	200.3	5.31
1018	200.4	4.16
1019	200.5	0.86
1020	200.6	0
1021	200.7	0.51
1022	200.8	5.29
1023	200.9	0
1024	201.3	0
1025	201.4	0.91
1026	201.5	1.14
1027	201.6	2.37
1028	201.7	2.36
1029	201.8	1.35
1030	201.9	0.64
1031	202	6.28
1032	202.1	18.17
1033	202.2	26.11
1034	202.3	21.45
1035	202.4	9.78
1036	202.5	3.69
1037	202.6	7.14
1038	202.7	15.03
1039	202.8	24.57
1040	202.9	34.11
1041	203	36.99
1042	203.1	23
1043	203.2	0
1044	203.6	0
1045	203.7	8.93
1046	203.8	19.76
1047	203.9	22.3
1048	204	13.03
1049	204.1	0
1050	204.7	0
1051	204.8	0.91
1052	204.9	74.72
1053	205	31.64
1054	205.1	0
1055	205.5	0
1056	205.6	3.78
1057	205.7	8.43
1058	205.8	0
1059	206.8	0
1060	206.9	10.99
1061	207	25.27
1062	207.1	23.94
1063	207.2	9.01
1064	207.3	0
1065	207.4	0.78
1066	207.5	16.74
1067	207.6	37.74
1068	207.7	47.1
1069	207.8	40.17
1070	207.9	30.67
1071	208	29.84
1072	208.1	31.06
1073	208.2	14.41
1074	208.3	0
1075	208.5	0
1076	208.6	12.07
1077	208.7	25.91
1078	208.8	32.13
1079	208.9	27.89
1080	209	14.87
1081	209.1	0.38
1082	209.2	0
1083	210.1	0
1084	210.2	0.06
1085	210.3	2.3
1086	210.4	0
1087	211	0
1088	211.1	5.47
1089	211.2	23.01
1090	211.3	25.76
1091	211.4	10.41
1092	211.5	0
1093	211.7	0
1094	211.8	0.21
1095	211.9	10.55
1096	212	27.58
1097	212.1	42.84
1098	212.2	48.8
1099	212.3	46.14
1100	212.4	38.16
1101	212.5	24.29
1102	212.6	0
1103	213	0
1104	213.1	2.51
1105	213.2	0
1106	213.4	0
1107	213.5	9.19
1108	213.6	13.68
1109	213.7	8.53
1110	213.8	0.02
1111	213.9	0
1112	214.7	0
1113	214.8	17.07
1114	214.9	39.62
1115	215	42.31
1116	215.1	13.3
1117	215.2	0
1118	215.5	0
1119	215.6	4.27
1120	215.7	1.49
1121	215.8	0
1122	216	0
1123	216.1	3.09
1124	216.2	6.9
1125	216.3	13.81
1126	216.4	22.28
1127	216.5	24.31
1128	216.6	20.43
1129	216.7	15.63
1130	216.8	11.79
1131	216.9	7.39
1132	217	4.11
1133	217.1	3.46
1134	217.2	1.56
1135	217.3	0
1136	217.5	0
1137	217.6	4.4
1138	217.7	8.2
1139	217.8	5.8
1140	217.9	1.35
1141	218	0
1142	218.5	0
1143	218.6	4.57
1144	218.7	10.76
1145	218.8	12.94
1146	218.9	7.36
1147	219	0
1148	219.2	0
1149	219.3	2.22
1150	219.4	0
1151	219.8	0
1152	219.9	3.61
1153	220	0
1154	220.3	0
1155	220.4	10.26
1156	220.5	7.17
1157	220.6	0
1158	221.4	0
1159	221.5	2.19
1160	221.6	0.7
1161	221.7	0
1162	221.8	0.68
1163	221.9	4.74
1164	222	9.45
1165	222.1	12.47
1166	222.2	23.71
1167	222.3	45.09
1168	222.4	78.41
1169	222.5	91.87
1170	222.6	47.56
1171	222.7	0
1172	222.9	0
1173	223	48.83
1174	223.1	145.95
1175	223.2	186.91
1176	223.3	150.91
1177	223.4	76.01
1178	223.5	20.44
1179	223.6	0
1180	224.4	0
1181	224.5	0.65
1182	224.6	0
1183	224.8	0
1184	224.9	9.25
1185	225	41
1186	225.1	60.07
1187	225.2	41.08
1188	225.3	0
1189	226.4	0
1190	226.5	5.86
1191	226.6	1.4
1192	226.7	0
1193	227.8	0
1194	227.9	33.06
1195	228	70.7
1196	228.1	73.35
1197	228.2	43.76
1198	228.3	15.91
1199	228.4	12.97
1200	228.5	13.18
1201	228.6	10.48
1202	228.7	7.23
1203	228.8	5.93
1204	228.9	5.78
1205	229	7.03
1206	229.1	11.46
1207	229.2	14.86
1208	229.3	10.87
1209	229.4	0
1210	230.1	0
1211	230.2	6.31
1212	230.3	11.61
1213	230.4	8.69
1214	230.5	1.66
1215	230.6	0
1216	230.8	0
1217	230.9	0.71
1218	231	4.07
1219	231.1	2.82
1220	231.2	0
1221	231.3	0
1222	231.4	3.07
1223	231.5	11.55
1224	231.6	14.09
1225	231.7	10.59
1226	231.8	5.63
1227	231.9	1.51
1228	232	0
1229	233	0
1230	233.1	7.31
1231	233.2	25.4
1232	233.3	27.7
1233	233.4	12.42
1234	233.5	0
1235	234.7	0
1236	234.8	3.58
1237	234.9	5.45
1238	235	9.35
1239	235.1	14.36
1240	235.2	16.76
1241	235.3	9.82
1242	235.4	1.79
1243	235.5	5.85
1244	235.6	17.59
1245	235.7	22.3
1246	235.8	16.54
1247	235.9	2.16
1248	236	0
1249	236.3	0
1250	236.4	0.23
1251	236.5	11.18
1252	236.6	8.29
1253	236.7	0
1254	236.8	0
1255	236.9	4.74
1256	237	18.89
1257	237.1	23.47
1258	237.2	16.36
1259	237.3	7.82
1260	237.4	10.13
1261	237.5	24.17
1262	237.6	39.19
1263	237.7	45.59
1264	237.8	40.33
1265	237.9	27.63
1266	238	12.68
1267	238.1	1.27
1268	238.2	0
1269	238.3	0
1270	238.4	0.29
1271	238.5	8.27
1272	238.6	14.92
1273	238.7	0
1274	239	0
1275	239.1	2.75
1276	239.2	22.17
1277	239.3	12.75
1278	239.4	0.16
1279	239.5	0
1280	239.9	0
1281	240	2.19
1282	240.1	5.27
1283	240.2	8.74
1284	240.3	13.08
1285	240.4	16.52
1286	240.5	14.42
1287	240.6	3
1288	240.7	0
1289	241	0
1290	241.1	2.6
1291	241.2	5.25
1292	241.3	2.51
1293	241.4	0.5
1294	241.5	0.44
1295	241.6	0
1296	242	0
1297	242.1	5.03
1298	242.2	1.64
1299	242.3	0
1300	242.6	0
1301	242.7	13.57
1302	242.8	15.7
1303	242.9	9.4
1304	243	6.33
1305	243.1	11.36
1306	243.2	16.23
1307	243.3	11.22
1308	243.4	0
1309	243.6	0
1310	243.7	9.91
1311	243.8	35.57
1312	243.9	43.42
1313	244	22.25
1314	244.1	0
1315	244.4	0
1316	244.5	1.01
1317	244.6	1.83
1318	244.7	0.82
1319	244.8	5.41
1320	244.9	16.98
1321	245	27.54
1322	245.1	26.09
1323	245.2	11.83
1324	245.3	0
1325	245.5	0
1326	245.6	3.24
1327	245.7	12.26
1328	245.8	18.13
1329	245.9	18.72
1330	246	13.3
1331	246.1	2.98
1332	246.2	0
1333	246.5	0
1334	246.6	6.85
1335	246.7	10.08
1336	246.8	8.23
1337	246.9	4.94
1338	247	2.23
1339	247.1	0.48
1340	247.2	0
1341	247.7	0
1342	247.8	6.33
1343	247.9	21.83
1344	248	27.78
1345	248.1	16.44
1346	248.2	0
1347	248.4	0
1348	248.5	1.04
1349	248.6	16.36
1350	248.7	24.01
1351	248.8	23.4
1352	248.9	17.97
1353	249	13.4
1354	249.1	9.5
1355	249.2	0
1356	249.6	0
1357	249.7	6.62
1358	249.8	3.59
1359	249.9	4.31
1360	250	22.27
1361	250.1	108.48
1362	250.2	196.77
1363	250.3	147.55
1364	250.4	0
1365	251	0
1366	251.1	7.27
1367	251.2	56.69
1368	251.3	0
1369	251.7	0
1370	251.8	15.03
1371	251.9	77.38
1372	252	89.04
1373	252.1	65.9
1374	252.2	56.37
1375	252.3	65.22
1376	252.4	53.93
1377	252.5	0
1378	255	0
1379	255.1	0.66
1380	255.2	6.37
1381	255.3	7.2
1382	255.4	6.31
1383	255.5	10.86
1384	255.6	19.26
1385	255.7	22.68
1386	255.8	16.5
1387	255.9	4.63
1388	256	0
1389	256.4	0
1390	256.5	1.87
1391	256.6	9.81
1392	256.7	13.69
1393	256.8	10.23
1394	256.9	1.54
1395	257	0
1396	257.8	0
1397	257.9	1.25
1398	258	0
1399	258.6	0
1400	258.7	0.78
1401	258.8	7.45
1402	258.9	21.77
1403	259	35.56
1404	259.1	38.01
1405	259.2	28.12
1406	259.3	14.52
1407	259.4	2.89
1408	259.5	0
1409	259.8	0
1410	259.9	2.66
1411	260	14.02
1412	260.1	17.11
1413	260.2	13.17
1414	260.3	6.07
1415	260.4	1.2
1416	260.5	0.32
1417	260.6	1.29
1418	260.7	2.74
1419	260.8	5.82
1420	260.9	9.66
1421	261	10.14
1422	261.1	5.73
1423	261.2	0.43
1424	261.3	0
1425	261.4	0
1426	261.5	0.75
1427	261.6	0.76
1428	261.7	0.39
1429	261.8	0
1430	262.1	0
1431	262.2	16.41
1432	262.3	98.2
1433	262.4	195.46
1434	262.5	302.72
1435	262.6	466.14
1436	262.7	717.38
1437	262.8	990.53
1438	262.9	1158.09
1439	263	1155.42
1440	263.1	1003.6
1441	263.2	743.59
1442	263.3	432.08
1443	263.4	146.44
1444	263.5	15.29
1445	263.6	22.35
1446	263.7	99.43
1447	263.8	162.1
1448	263.9	153.33
1449	264	100.73
1450	264.1	64.69
1451	264.2	64.74
1452	264.3	74
1453	264.4	62.47
1454	264.5	38.1
1455	264.6	21.46
1456	264.7	13.6
1457	264.8	2.43
1458	264.9	0
1459	266.2	0
1460	266.3	0.6
1461	266.4	1.98
1462	266.5	0
1463	266.8	0
1464	266.9	25.32
1465	267	22.56
1466	267.1	0
1467	267.3	0
1468	267.4	0.86
1469	267.5	0
1470	268.5	0
1471	268.6	2.21
1472	268.7	1.49
1473	268.8	0
1474	269.1	0
1475	269.2	18.71
1476	269.3	15.63
1477	269.4	0
1478	269.6	0
1479	269.7	4.68
1480	269.8	9.76
1481	269.9	0
1482	270.3	0
1483	270.4	0.43
1484	270.5	8.77
1485	270.6	11.24
1486	270.7	10.19
1487	270.8	6.25
1488	270.9	1.44
1489	271	0
1490	271.1	5.02
1491	271.2	17.82
1492	271.3	27.32
1493	271.4	23.85
1494	271.5	8.06
1495	271.6	0
1496	272.3	0
1497	272.4	3.57
1498	272.5	4.06
1499	272.6	0
1500	272.8	0
1501	272.9	5.73
1502	273	7.93
1503	273.1	3.38
1504	273.2	0
1505	273.3	0
1506	273.4	0.9
1507	273.5	0
1508	273.7	0
1509	273.8	15.91
1510	273.9	39.24
1511	274	44.38
1512	274.1	19.75
1513	274.2	0
1514	274.9	0
1515	275	2.39
1516	275.1	12.68
1517	275.2	10.78
1518	275.3	4.18
1519	275.4	0.45
1520	275.5	1.09
1521	275.6	2.21
1522	275.7	1.62
1523	275.8	0.13
1524	275.9	0
1525	276	0
1526	276.1	0.51
1527	276.2	0.26
1528	276.3	0
1529	276.4	3.37
1530	276.5	12.01
1531	276.6	19.75
1532	276.7	15.78
1533	276.8	0
1534	277.9	0
1535	278	4.1
1536	278.1	3.78
1537	278.2	0
1538	278.6	0
1539	278.7	28.36
1540	278.8	0
1541	279.2	0
1542	279.3	156.61
1543	279.4	205.89
1544	279.5	105.48
1545	279.6	0
1546	281.2	0
1547	281.3	14.78
1548	281.4	17.83
1549	281.5	5.96
1550	281.6	0
1551	281.7	13.59
1552	281.8	41.68
1553	281.9	49.46
1554	282	30.53
1555	282.1	11.63
1556	282.2	13.35
1557	282.3	22.73
1558	282.4	18.26
1559	282.5	4.8
1560	282.6	0
1561	283.3	0
1562	283.4	2.05
1563	283.5	0
1564	284	0
1565	284.1	1.34
1566	284.2	11.05
1567	284.3	17.6
1568	284.4	19.5
1569	284.5	12.94
1570	284.6	0.03
1571	284.7	0
1572	285	0
1573	285.1	24.12
1574	285.2	34.61
1575	285.3	28.61
1576	285.4	19.21
1577	285.5	15.89
1578	285.6	16.42
1579	285.7	16.98
1580	285.8	14.19
1581	285.9	10.11
1582	286	8.9
1583	286.1	9.74
1584	286.2	7.2
1585	286.3	0.13
1586	286.4	0
1587	286.5	0
1588	286.6	0.22
1589	286.7	5.85
1590	286.8	9.47
1591	286.9	9.79
1592	287	5.69
1593	287.1	0
1594	288.4	0
1595	288.5	2.83
1596	288.6	9.1
1597	288.7	15.1
1598	288.8	15.63
1599	288.9	9.31
1600	289	1.23
1601	289.1	0
1602	289.7	0
1603	289.8	1.27
1604	289.9	3.57
1605	290	1.52
1606	290.1	0
1607	290.3	0
1608	290.4	0.01
1609	290.5	0
1610	290.6	0
1611	291.1	0
1612	291.2	0.21
1613	291.3	0.7
1614	291.4	1.16
1615	291.5	1.34
1616	291.6	1.16
1617	291.7	0.82
1618	291.8	0.49
1619	291.9	0
1620	292	0
1621	292.1	1.03
1622	292.2	5.99
1623	292.3	10.99
1624	292.4	9.1
1625	292.5	0
1626	293.2	0
1627	293.3	1.86
1628	293.4	5.21
1629	293.5	5.55
1630	293.6	2.73
1631	293.7	0.01
1632	293.8	0.49
1633	293.9	2.72
1634	294	1.04
1635	294.1	0
1636	294.4	0
1637	294.5	1.5
1638	294.6	25.58
1639	294.7	20.93
1640	294.8	1.19
1641	294.9	0
1642	295.1	0
1643	295.2	2.81
1644	295.3	14.72
1645	295.4	26.56
1646	295.5	23.16
1647	295.6	10.01
1648	295.7	0.66
1649	295.8	0
1650	295.9	3.06
1651	296	4.17
1652	296.1	0
1653	296.2	0
1654	296.3	10.29
1655	296.4	21.08
1656	296.5	0
1657	298.5	0
1658	298.6	26.9
1659	298.7	54.38
1660	298.8	52.67
1661	298.9	16.63
1662	299	0
1663	299.2	0
1664	299.3	11.87
1665	299.4	10.09
1666	299.5	0
1667	299.6	0
1668	299.7	10.46
1669	299.8	36.92
1670	299.9	61.49
1671	300	66.89
1672	300.1	48.68
1673	300.2	19.41
1674	300.3	0
1675	300.6	0
1676	300.7	52.62
1677	300.8	153.91
1678	300.9	170.33
1679	301	81.96
1680	301.1	0
1681	301.6	0
1682	301.7	4.32
1683	301.8	9.81
1684	301.9	4.73
1685	302	0
1686	302.6	0
1687	302.7	0.6
1688	302.8	6.83
1689	302.9	14.27
1690	303	18.6
1691	303.1	16.01
1692	303.2	8.2
1693	303.3	0.49
1694	303.4	0
1695	304.5	0
1696	304.6	1.45
1697	304.7	1.53
1698	304.8	0
1699	305.3	0
1700	305.4	4.58
1701	305.5	17.57
1702	305.6	21.55
1703	305.7	14.72
1704	305.8	5.87
1705	305.9	3.92
1706	306	6.09
1707	306.1	3.54
1708	306.2	0
1709	306.6	0
1710	306.7	0.06
1711	306.8	0
1712	307.4	0
1713	307.5	0.39
1714	307.6	0.7
1715	307.7	0.69
1716	307.8	0
1717	308.8	0
1718	308.9	7.05
1719	309	22.17
1720	309.1	31.17
1721	309.2	26.07
1722	309.3	12.17
1723	309.4	0
1724	311.1	0
1725	311.2	3.31
1726	311.3	11.54
1727	311.4	10.72
1728	311.5	5.68
1729	311.6	1.23
1730	311.7	0.13
1731	311.8	2.05
1732	311.9	4.4
1733	312	4.77
1734	312.1	2.9
1735	312.2	0.02
1736	312.3	0
1737	312.7	0
1738	312.8	2.52
1739	312.9	6.88
1740	313	15.06
1741	313.1	24.95
1742	313.2	27.34
1743	313.3	19.23
1744	313.4	8.09
1745	313.5	1.5
1746	313.6	0
1747	313.9	0
1748	314	1.84
1749	314.1	7.01
1750	314.2	6.27
1751	314.3	0.63
1752	314.4	0
1753	315.9	0
1754	316	15.66
1755	316.1	29.43
1756	316.2	27.51
1757	316.3	15.58
1758	316.4	4.13
1759	316.5	0
1760	317.6	0
1761	317.7	1
1762	317.8	2.48
1763	317.9	3.61
1764	318	5.4
1765	318.1	7.52
1766	318.2	7.93
1767	318.3	5.56
1768	318.4	2.17
1769	318.5	0.31
1770	318.6	0.31
1771	318.7	0.19
1772	318.8	0
1773	319.4	0
1774	319.5	0.98
1775	319.6	0.86
1776	319.7	0.13
1777	319.8	0
1778	320.2	0
1779	320.3	0.58
1780	320.4	0.22
1781	320.5	0
1782	321	0
1783	321.1	0.15
1784	321.2	0
1785	321.5	0
1786	321.6	30.42
1787	321.7	81.61
1788	321.8	133.49
1789	321.9	165.81
1790	322	176.51
1791	322.1	193.68
1792	322.2	223.67
1793	322.3	245.35
1794	322.4	267.2
1795	322.5	280.58
1796	322.6	245.92
1797	322.7	132.19
1798	322.8	0
1799	326.3	0
1800	326.4	50.92
1801	326.5	87.56
1802	326.6	103.47
1803	326.7	101.71
1804	326.8	57.47
1805	326.9	0
1806	328	0
1807	328.1	115.04
1808	328.2	141.49
1809	328.3	78.12
1810	328.4	2.34
1811	328.5	0
1812	329.1	0
1813	329.2	7.25
1814	329.3	19.64
1815	329.4	21.57
1816	329.5	13.05
1817	329.6	2.06
1818	329.7	0
1819	330.8	0
1820	330.9	0.33
1821	331	2.94
1822	331.1	3.97
1823	331.2	2.01
1824	331.3	0
1825	331.8	0
1826	331.9	15.95
1827	332	40.14
1828	332.1	42.7
1829	332.2	24.12
1830	332.3	3.44
1831	332.4	0
1832	332.5	0
1833	332.6	1.41
1834	332.7	1.45
1835	332.8	0
1836	333.3	0
1837	333.4	11.57
1838	333.5	21.57
1839	333.6	22.32
1840	333.7	13.03
1841	333.8	3.2
1842	333.9	0.31
1843	334	2.65
1844	334.1	4.35
1845	334.2	3.25
1846	334.3	1.45
1847	334.4	0.54
1848	334.5	0.36
1849	334.6	1.27
1850	334.7	4.13
1851	334.8	7.57
1852	334.9	8.24
1853	335	5.1
1854	335.1	1.01
1855	335.2	0
1856	335.3	0
1857	335.4	4.51
1858	335.5	18.13
1859	335.6	33.68
1860	335.7	38.08
1861	335.8	26.28
1862	335.9	8.03
1863	336	0.02
1864	336.1	7.71
1865	336.2	30.63
1866	336.3	53.41
1867	336.4	58.28
1868	336.5	44.76
1869	336.6	27.58
1870	336.7	18.37
1871	336.8	12.33
1872	336.9	7.11
1873	337	2.1
1874	337.1	0
1875	337.5	0
1876	337.6	17.73
1877	337.7	61.72
1878	337.8	59.6
1879	337.9	0
1880	338.2	0
1881	338.3	47.46
1882	338.4	38.78
1883	338.5	0
1884	339.1	0
1885	339.2	3.84
1886	339.3	0
1887	339.6	0
1888	339.7	0.16
1889	339.8	0
1890	340	0
1891	340.1	0.99
1892	340.2	9.8
1893	340.3	23.75
1894	340.4	32.13
1895	340.5	24.27
1896	340.6	1.22
1897	340.7	0
1898	341.8	0
1899	341.9	7.58
1900	342	27.95
1901	342.1	33.24
1902	342.2	18.62
1903	342.3	0
1904	342.5	0
1905	342.6	0.75
1906	342.7	5.25
1907	342.8	7.65
1908	342.9	8.26
1909	343	9.76
1910	343.1	15.25
1911	343.2	21.46
1912	343.3	19.86
1913	343.4	8.24
1914	343.5	0
1915	344	0
1916	344.1	22.62
1917	344.2	36.64
1918	344.3	24.47
1919	344.4	0
1920	344.7	0
1921	344.8	8.6
1922	344.9	25.51
1923	345	24.62
1924	345.1	8.12
1925	345.2	0
1926	346.5	0
1927	346.6	1.51
1928	346.7	3.8
1929	346.8	2.94
1930	346.9	0
1931	347	0
1932	347.1	6.04
1933	347.2	15.3
1934	347.3	18.07
1935	347.4	11.9
1936	347.5	3.07
1937	347.6	0
1938	348.5	0
1939	348.6	15.79
1940	348.7	23.54
1941	348.8	2.19
1942	348.9	0
1943	349.4	0
1944	349.5	2.16
1945	349.6	8.91
1946	349.7	17.45
1947	349.8	20.22
1948	349.9	12.18
1949	350	0
1950	350.8	0
1951	350.9	0.96
1952	351	2.96
1953	351.1	4.89
1954	351.2	4.37
1955	351.3	1.72
1956	351.4	0
1957	351.5	0.1
1958	351.6	2.94
1959	351.7	7.72
1960	351.8	11.83
1961	351.9	9.76
1962	352	0
1963	352.4	0
1964	352.5	0.97
1965	352.6	0.45
1966	352.7	0
1967	352.8	0.77
1968	352.9	2.26
1969	353	3.59
1970	353.1	5.44
1971	353.2	7.15
1972	353.3	7.09
1973	353.4	5.35
1974	353.5	3.47
1975	353.6	1.81
1976	353.7	0
1977	353.8	0
1978	353.9	0.75
1979	354	3.63
1980	354.1	4.9
1981	354.2	4.71
1982	354.3	5.12
1983	354.4	5.13
1984	354.5	3.23
1985	354.6	4.61
1986	354.7	15.79
1987	354.8	28.93
1988	354.9	21.38
1989	355	0
1990	355.5	0
1991	355.6	5.44
1992	355.7	0
1993	357.4	0
1994	357.5	1.34
1995	357.6	5.18
1996	357.7	2.62
1997	357.8	0
[truncated: 1,625 more rows]

## Sheet: Sheet4
+ESI Scan (rt: 17.04-17.25 min, 47 scans) Frag=100.0V CF=0.000 DF=0.000 Blank-r003.d Subtract
Index	X	Y
0	50	0.37
1	50.1	0.44
2	50.2	0.59
3	50.3	0.76
4	50.4	0.73
5	50.5	0.35
6	50.6	0
7	51	0
8	51.1	0.46
9	51.2	0.64
10	51.3	0.47
11	51.4	0.2
12	51.5	0.06
13	51.6	0.06
14	51.7	0.18
15	51.8	0.38
16	51.9	0.52
17	52	0.44
18	52.1	0.13
19	52.2	0
20	52.6	0
21	52.7	0.04
22	52.8	0.41
23	52.9	0.61
24	53	0.44
25	53.1	0.05
26	53.2	0
27	54	0
28	54.1	0.41
29	54.2	0.8
30	54.3	1.01
31	54.4	1.05
32	54.5	0.57
33	54.6	0
34	55.5	0
35	55.6	0.79
36	55.7	1.18
37	55.8	0.31
38	55.9	0
39	56.6	0
40	56.7	4.18
41	56.8	11.75
42	56.9	15.6
43	57	13.98
44	57.1	10.56
45	57.2	7.63
46	57.3	3.24
47	57.4	0
48	57.9	0
49	58	0.66
50	58.1	2.58
51	58.2	1.1
52	58.3	0
53	59.2	0
54	59.3	16.29
55	59.4	19.53
56	59.5	0
57	59.7	0
58	59.8	44.04
59	59.9	122.05
60	60	178.38
61	60.1	164.68
62	60.2	91.05
63	60.3	18.12
64	60.4	0
65	60.6	0
66	60.7	2.51
67	60.8	5.45
68	60.9	11.33
69	61	13.65
70	61.1	8.62
71	61.2	0
72	61.7	0
73	61.8	1.09
74	61.9	1
75	62	0.53
76	62.1	0.53
77	62.2	0.38
78	62.3	0
79	62.6	0
80	62.7	0.18
81	62.8	1.37
82	62.9	1.63
83	63	1.2
84	63.1	0.9
85	63.2	0.82
86	63.3	0.08
87	63.4	0
88	64.5	0
89	64.6	3.4
90	64.7	3.03
91	64.8	1.28
92	64.9	0
93	65	0
94	65.1	0.35
95	65.2	1.42
96	65.3	1.87
97	65.4	1.61
98	65.5	1.14
99	65.6	0.61
100	65.7	0
101	66.4	0
102	66.5	0.46
103	66.6	1
104	66.7	1
105	66.8	0.37
106	66.9	0
107	67	0
108	67.1	0.12
109	67.2	0.59
110	67.3	0.33
111	67.4	0
112	67.6	0
113	67.7	0.26
114	67.8	0.81
115	67.9	1.05
116	68	1.15
117	68.1	1.2
118	68.2	1.15
119	68.3	1.05
120	68.4	1.01
121	68.5	0.74
122	68.6	0
123	68.9	0
124	69	2.22
125	69.1	6.1
126	69.2	7.67
127	69.3	6.35
128	69.4	3.5
129	69.5	0.85
130	69.6	0
131	69.7	0
132	69.8	0.78
133	69.9	1.68
134	70	1.45
135	70.1	0.44
136	70.2	0
137	70.6	0
138	70.7	5.11
139	70.8	15.43
140	70.9	16.19
141	71	0.96
142	71.1	0
143	71.2	0
144	71.3	4.86
145	71.4	17.97
146	71.5	15.08
147	71.6	6.33
148	71.7	0
149	72.1	0
150	72.2	3.18
151	72.3	6.65
152	72.4	6.99
153	72.5	5.43
154	72.6	5.62
155	72.7	17.87
156	72.8	32.48
157	72.9	24.51
158	73	0
159	73.6	0
160	73.7	0.59
161	73.8	13.68
162	73.9	6.4
163	74	0
164	74.3	0
165	74.4	3.51
166	74.5	4.47
167	74.6	3.94
168	74.7	3.35
169	74.8	2.67
170	74.9	1.65
171	75	0.49
172	75.1	0
173	76.1	0
174	76.2	0.61
175	76.3	2.71
176	76.4	6.74
177	76.5	10.92
178	76.6	7.64
179	76.7	0
180	77.6	0
181	77.7	0.34
182	77.8	1.74
183	77.9	1.75
184	78	0.97
185	78.1	0
186	78.3	0
187	78.4	1.01
188	78.5	28.16
189	78.6	90.37
190	78.7	179.3
191	78.8	263.38
192	78.9	319.14
193	79	344.49
194	79.1	341.9
195	79.2	297.92
196	79.3	206.31
197	79.4	98.01
198	79.5	16.72
199	79.6	0
200	79.9	0
201	80	1.86
202	80.1	8.14
203	80.2	16.06
204	80.3	21.59
205	80.4	22.97
206	80.5	7.38
207	80.6	0
208	80.8	0
209	80.9	36.12
210	81	67.12
211	81.1	0
212	81.5	0
213	81.6	10.71
214	81.7	15.04
215	81.8	16.44
216	81.9	13.68
217	82	4.68
218	82.1	0
219	82.4	0
220	82.5	2.17
221	82.6	3.83
222	82.7	4.81
223	82.8	4.18
224	82.9	2.02
225	83	0.09
226	83.1	0.59
227	83.2	3.54
228	83.3	6.14
229	83.4	5.87
230	83.5	3.27
231	83.6	0.4
232	83.7	0
233	84.1	0
234	84.2	1.79
235	84.3	2.91
236	84.4	2.9
237	84.5	1.14
238	84.6	0
239	85	0
240	85.1	2.91
241	85.2	10.94
242	85.3	12.12
243	85.4	5.24
244	85.5	0
245	86.3	0
246	86.4	1.59
247	86.5	1.8
248	86.6	0
249	87	0
250	87.1	1.55
251	87.2	1.28
252	87.3	0
253	87.5	0
254	87.6	0.12
255	87.7	0.61
256	87.8	0
257	88.6	0
258	88.7	2.1
259	88.8	63.65
260	88.9	102.43
261	89	74.44
262	89.1	0
263	89.5	0
264	89.6	6.02
265	89.7	2.51
266	89.8	0.76
267	89.9	0.62
268	90	3.91
269	90.1	9.84
270	90.2	15.74
271	90.3	18.54
272	90.4	17.79
273	90.5	13.08
274	90.6	4.02
275	90.7	0
276	90.8	0
277	90.9	4.88
278	91	23.19
279	91.1	28.45
280	91.2	17.35
281	91.3	2.89
282	91.4	0
283	91.5	0
284	91.6	1.79
285	91.7	2.74
286	91.8	1.75
287	91.9	0.35
288	92	0
289	92.1	0.39
290	92.2	0.73
291	92.3	0.1
292	92.4	0
293	92.9	0
294	93	0.21
295	93.1	1.86
296	93.2	2.65
297	93.3	2.54
298	93.4	1.92
299	93.5	1.21
300	93.6	0.69
301	93.7	0.41
302	93.8	0.23
303	93.9	0
304	94.1	0
305	94.2	0.45
306	94.3	1.11
307	94.4	0.92
308	94.5	0
309	95	0
310	95.1	2.38
311	95.2	0.11
312	95.3	0
313	96.2	0
314	96.3	0.94
315	96.4	6.14
316	96.5	11.94
317	96.6	13.25
318	96.7	5.44
319	96.8	0
320	97.1	0
321	97.2	0.81
322	97.3	3.17
323	97.4	1.61
324	97.5	0
325	98.2	0
326	98.3	7.42
327	98.4	11.07
328	98.5	0
329	99.2	0
330	99.3	2.8
331	99.4	14.03
332	99.5	0.02
333	99.6	0
334	101.3	0
335	101.4	5.69
336	101.5	66.71
337	101.6	76.5
338	101.7	26.44
339	101.8	0
340	101.9	0
341	102	53.51
342	102.1	105.48
343	102.2	34.22
344	102.3	0
345	102.5	0
346	102.6	47.15
347	102.7	47.81
348	102.8	13.94
349	102.9	0
350	103	0
351	103.1	5.39
352	103.2	7.82
353	103.3	5.92
354	103.4	7.68
355	103.5	23.27
356	103.6	42.3
357	103.7	10.92
358	103.8	0
359	104.5	0
360	104.6	0.36
361	104.7	20.85
362	104.8	13.67
363	104.9	0
364	105.5	0
365	105.6	16.87
366	105.7	81.09
367	105.8	126.67
368	105.9	120.95
369	106	72.81
370	106.1	16.21
371	106.2	0
372	106.3	0
373	106.4	5.82
374	106.5	42.98
375	106.6	70.58
376	106.7	106.86
377	106.8	151.18
378	106.9	185.68
379	107	184.9
380	107.1	148.11
381	107.2	96.31
382	107.3	44.53
383	107.4	0
384	107.9	0
385	108	21.1
386	108.1	116.59
387	108.2	144.06
388	108.3	126.88
389	108.4	130.88
390	108.5	177.37
391	108.6	271.09
392	108.7	389.46
393	108.8	460.89
394	108.9	448.59
395	109	369.97
396	109.1	266.54
397	109.2	163.83
398	109.3	77.16
399	109.4	25.69
400	109.5	5.24
401	109.6	0
402	109.7	1.35
403	109.8	13.23
404	109.9	25.47
405	110	26.95
406	110.1	16.9
407	110.2	0
408	112	0
409	112.1	58.2
410	112.2	86.71
411	112.3	51.15
412	112.4	0
413	112.8	0
414	112.9	35.36
415	113	71.8
416	113.1	73.68
417	113.2	72.27
418	113.3	62.19
419	113.4	23.7
420	113.5	0
421	114.6	0
422	114.7	23.49
423	114.8	71.46
424	114.9	42.31
425	115	0
426	115.5	0
427	115.6	157.27
428	115.7	308.81
429	115.8	318.08
430	115.9	175.05
431	116	0
432	116.3	0
433	116.4	88.33
434	116.5	210.36
435	116.6	169.6
436	116.7	107.51
437	116.8	78.01
438	116.9	69.83
439	117	56.57
440	117.1	35.45
441	117.2	21.21
442	117.3	10.68
443	117.4	0
444	118.3	0
445	118.4	4.71
446	118.5	14.38
447	118.6	18.97
448	118.7	15.31
449	118.8	10.04
450	118.9	11.08
451	119	13.52
452	119.1	14.53
453	119.2	13.24
454	119.3	7.16
455	119.4	0
456	119.7	0
457	119.8	10.07
458	119.9	15.48
459	120	11.98
460	120.1	2
461	120.2	0
462	120.8	0
463	120.9	2.25
464	121	3.11
465	121.1	0
466	121.9	0
467	122	75.6
468	122.1	161.68
469	122.2	106.86
470	122.3	0
471	123	0
472	123.1	7.76
473	123.2	25.17
474	123.3	39.95
475	123.4	53.89
476	123.5	76.38
477	123.6	91.8
478	123.7	50.23
479	123.8	0
480	124.1	0
481	124.2	14.61
482	124.3	63.13
483	124.4	23.88
484	124.5	0
485	124.9	0
486	125	12.09
487	125.1	34.9
488	125.2	48.62
489	125.3	42.01
490	125.4	17.01
491	125.5	0
492	125.9	0
493	126	7
494	126.1	59.57
495	126.2	49.35
496	126.3	9.62
497	126.4	0
498	127.6	0
499	127.7	6.79
500	127.8	59.1
501	127.9	77.89
502	128	26.18
503	128.1	0
504	128.9	0
505	129	15.26
506	129.1	50.93
507	129.2	30.75
508	129.3	1.81
509	129.4	29.39
510	129.5	115.7
511	129.6	204.01
512	129.7	220.3
513	129.8	133.18
514	129.9	0
515	131	0
516	131.1	16.84
517	131.2	33.82
518	131.3	24.57
519	131.4	11.08
520	131.5	3.74
521	131.6	0
522	131.7	0
523	131.8	7.36
524	131.9	16.41
525	132	10.17
526	132.1	0
527	132.3	0
528	132.4	1.43
529	132.5	5.79
530	132.6	0
531	133.4	0
532	133.5	4.48
533	133.6	7.31
534	133.7	3.11
535	133.8	0
536	134.3	0
537	134.4	1.85
538	134.5	3.68
539	134.6	1.93
540	134.7	5.64
541	134.8	15.32
542	134.9	19.09
543	135	5.59
544	135.1	0
545	135.3	0
546	135.4	50.1
547	135.5	98.71
548	135.6	111.3
549	135.7	94.3
550	135.8	58.87
551	135.9	0
552	136.1	0
553	136.2	117.67
554	136.3	350.2
555	136.4	598.8
556	136.5	943.13
557	136.6	1468.97
558	136.7	2017.54
559	136.8	2381.17
560	136.9	2514.35
561	137	2489.1
562	137.1	2300.44
563	137.2	1889.92
564	137.3	1279.46
565	137.4	674.98
566	137.5	280.23
567	137.6	141.31
568	137.7	115.14
569	137.8	117.83
570	137.9	141.18
571	138	145.83
572	138.1	120.4
573	138.2	88.35
574	138.3	68.59
575	138.4	55.01
576	138.5	41.76
577	138.6	41.92
578	138.7	67.54
579	138.8	113.09
580	138.9	160.9
581	139	179.46
582	139.1	158.91
583	139.2	114.96
584	139.3	88.13
585	139.4	114.39
586	139.5	185.05
587	139.6	220.73
588	139.7	117.9
589	139.8	0
590	140.9	0
591	141	4.23
592	141.1	52.59
593	141.2	96.34
594	141.3	107.42
595	141.4	89.21
596	141.5	55.57
597	141.6	37.79
598	141.7	13.96
599	141.8	0
600	142.2	0
601	142.3	28.27
602	142.4	73.62
603	142.5	89.65
604	142.6	84.3
605	142.7	35.22
606	142.8	0
607	144.2	0
608	144.3	30.42
609	144.4	20.23
610	144.5	0
611	144.6	0
612	144.7	16.69
613	144.8	80.52
614	144.9	84.81
615	145	29.02
616	145.1	0
617	145.5	0
618	145.6	28.38
619	145.7	19.65
620	145.8	0
621	146.2	0
622	146.3	1.95
623	146.4	0
624	146.9	0
625	147	36.17
626	147.1	69.19
627	147.2	55.98
628	147.3	20
629	147.4	6.79
630	147.5	9.41
631	147.6	18.17
632	147.7	30.68
633	147.8	33.56
634	147.9	18.91
635	148	0
636	151.5	0
637	151.6	4.53
638	151.7	0
639	151.8	0
640	151.9	0.82
641	152	23.04
642	152.1	51.5
643	152.2	61.46
644	152.3	40.7
645	152.4	0.84
646	152.5	0
647	153.4	0
648	153.5	4.31
649	153.6	6.02
650	153.7	10.27
651	153.8	7.82
652	153.9	0
653	154.5	0
654	154.6	0.32
655	154.7	23.48
656	154.8	16.97
657	154.9	3.75
658	155	0
659	155.4	0
660	155.5	1.33
661	155.6	5.22
662	155.7	4.58
663	155.8	10.25
664	155.9	21.67
665	156	26.45
666	156.1	13.92
667	156.2	0
668	157	0
669	157.1	7.5
670	157.2	17.82
671	157.3	40.95
672	157.4	52.67
673	157.5	3.26
674	157.6	0
675	158.5	0
676	158.6	7.19
677	158.7	31.23
678	158.8	58.24
679	158.9	71.55
680	159	61.84
681	159.1	30.72
682	159.2	0
683	160	0
684	160.1	1.64
685	160.2	4.76
686	160.3	2.16
687	160.4	0
688	161.6	0
689	161.7	2.87
690	161.8	3.75
691	161.9	0
692	163.9	0
693	164	11.15
694	164.1	74.61
695	164.2	213.99
696	164.3	475.75
697	164.4	805.45
698	164.5	1142.97
699	164.6	1468.83
700	164.7	1763.07
701	164.8	1948.99
702	164.9	1953.33
703	165	1788.67
704	165.1	1484.2
705	165.2	1044.46
706	165.3	556.05
707	165.4	193.79
708	165.5	59.63
709	165.6	18.72
710	165.7	26.8
711	165.8	37.77
712	165.9	46.18
713	166	31.13
714	166.1	8.08
715	166.2	7.34
716	166.3	26.89
717	166.4	49.07
718	166.5	68.25
719	166.6	88.62
720	166.7	100.41
721	166.8	104.28
722	166.9	110.2
723	167	120.58
724	167.1	115.33
725	167.2	83.46
726	167.3	37.98
727	167.4	10.81
728	167.5	1.18
729	167.6	0
730	168.3	0
731	168.4	1.26
732	168.5	6.1
733	168.6	1.7
734	168.7	0
735	168.8	3.82
736	168.9	14.18
737	169	22.6
738	169.1	26.67
739	169.2	26.67
740	169.3	21.25
741	169.4	11.76
742	169.5	5.16
743	169.6	4.37
744	169.7	0
745	170.2	0
746	170.3	0.53
747	170.4	0
748	170.7	0
749	170.8	3.05
750	170.9	6.14
751	171	3.3
752	171.1	0
753	172	0
754	172.1	0.71
755	172.2	0
756	173.7	0
757	173.8	1.35
758	173.9	10.81
759	174	13.21
760	174.1	4.47
761	174.2	0
762	174.3	0
763	174.4	8.04
764	174.5	34.11
765	174.6	21.53
766	174.7	0
767	175.4	0
768	175.5	6.5
769	175.6	43.08
770	175.7	52.38
771	175.8	42.16
772	175.9	12.03
773	176	0
774	176.8	0
775	176.9	0.04
776	177	0
777	178.1	0
778	178.2	11.51
779	178.3	17.96
780	178.4	15.74
781	178.5	16.13
782	178.6	23.76
783	178.7	32.49
784	178.8	34.36
785	178.9	26.4
786	179	16.54
787	179.1	14.05
788	179.2	17.29
789	179.3	15.65
790	179.4	10.02
791	179.5	5.93
792	179.6	7.1
793	179.7	6.5
794	179.8	0
795	179.9	0
796	180	16.25
797	180.1	59.7
798	180.2	88.53
799	180.3	76.04
800	180.4	33.9
801	180.5	4.28
802	180.6	1.6
803	180.7	0.37
804	180.8	0
805	181.2	0
806	181.3	9.79
807	181.4	12.54
808	181.5	3.34
809	181.6	0
810	182	0
811	182.1	12.35
812	182.2	205.13
813	182.3	724.18
814	182.4	1633.62
815	182.5	2640.72
816	182.6	3388.79
817	182.7	3708.49
818	182.8	3745.3
819	182.9	3773.28
820	183	3826.61
821	183.1	3595.62
822	183.2	2795.03
823	183.3	1604.02
824	183.4	572.23
825	183.5	114.74
826	183.6	69.53
827	183.7	103.58
828	183.8	137.14
829	183.9	136.36
830	184	114.79
831	184.1	84.55
832	184.2	60.62
833	184.3	71.43
834	184.4	118.9
835	184.5	176.21
836	184.6	218.17
837	184.7	250.07
838	184.8	275.53
839	184.9	287.85
840	185	271.14
841	185.1	218.72
842	185.2	140.54
843	185.3	60.41
844	185.4	2.16
845	185.5	0
846	186	0
847	186.1	10.84
848	186.2	9.34
849	186.3	3.14
850	186.4	0
851	186.5	1.27
852	186.6	0
853	188.1	0
854	188.2	2.13
855	188.3	1.86
856	188.4	0
857	188.5	0
858	189.8	0
859	189.9	2.91
860	190	11.55
861	190.1	13.49
862	190.2	5.67
863	190.3	0
864	190.4	0
865	190.5	4.5
866	190.6	6.76
867	190.7	0.53
868	190.8	0
869	191.1	0
870	191.2	1.48
871	191.3	4.97
872	191.4	0
873	192.1	0
874	192.2	5.77
875	192.3	7.01
876	192.4	4.95
877	192.5	2.82
878	192.6	0
879	192.9	0
880	193	14.78
881	193.1	28.71
882	193.2	31.21
883	193.3	29.8
884	193.4	27.38
885	193.5	20.57
886	193.6	5.7
887	193.7	0
888	193.8	5.69
889	193.9	23.24
890	194	36.15
891	194.1	36.61
892	194.2	24.56
893	194.3	5.95
894	194.4	0
895	194.5	2.92
896	194.6	30.3
897	194.7	56.46
898	194.8	55.22
899	194.9	14.56
900	195	0
901	195.3	0
902	195.4	4.97
903	195.5	0
904	195.8	0
905	195.9	7.67
906	196	7.93
907	196.1	7.79
908	196.2	11.42
909	196.3	16.99
910	196.4	23.46
911	196.5	35.8
912	196.6	52.35
913	196.7	61.74
914	196.8	56.39
915	196.9	43
916	197	29.87
917	197.1	18.22
918	197.2	6.68
919	197.3	0
920	197.5	0
921	197.6	9.68
922	197.7	11.38
923	197.8	0
924	198.1	0
925	198.2	30.12
926	198.3	41.38
927	198.4	23.39
928	198.5	0
929	199.6	0
930	199.7	14.01
931	199.8	28.14
932	199.9	30.2
933	200	24.23
934	200.1	11.98
935	200.2	0
936	200.6	0
937	200.7	10.42
938	200.8	24.01
939	200.9	19.03
940	201	0
941	201.4	0
942	201.5	0.62
943	201.6	1.95
944	201.7	2.62
945	201.8	4.01
946	201.9	6
947	202	8.57
948	202.1	9.17
949	202.2	4.42
950	202.3	0
951	202.7	0
952	202.8	2.14
953	202.9	6.54
954	203	3.28
955	203.1	0
956	203.8	0
957	203.9	1.79
958	204	11.21
959	204.1	23.82
960	204.2	16.9
961	204.3	0
962	205.6	0
963	205.7	4.37
964	205.8	0
965	206.3	0
966	206.4	16.07
967	206.5	33.57
968	206.6	34.5
969	206.7	21.26
970	206.8	10.69
971	206.9	12.58
972	207	22.67
973	207.1	31.16
974	207.2	33.91
975	207.3	29.52
976	207.4	17.27
977	207.5	0
978	207.6	0
979	207.7	1.44
980	207.8	32.84
981	207.9	62.1
982	208	64.26
983	208.1	38.58
984	208.2	7.99
985	208.3	0
986	208.4	0
987	208.5	2.97
988	208.6	7.72
989	208.7	8.8
990	208.8	6.91
991	208.9	3.08
992	209	0
993	210.3	0
994	210.4	0.35
995	210.5	0
996	211.2	0
997	211.3	6.18
998	211.4	12.24
999	211.5	14.13
1000	211.6	21.25
1001	211.7	30.37
1002	211.8	34.44
1003	211.9	27.91
1004	212	14.87
1005	212.1	2.43
1006	212.2	0
1007	213.2	0
1008	213.3	0.89
1009	213.4	1.39
1010	213.5	2.29
1011	213.6	7.22
1012	213.7	14.09
1013	213.8	8.44
1014	213.9	0
1015	214.9	0
1016	215	1.9
1017	215.1	1.12
1018	215.2	0
1019	215.5	0
1020	215.6	11.82
1021	215.7	26.34
1022	215.8	33.84
1023	215.9	30.74
1024	216	24.85
1025	216.1	10.99
1026	216.2	0
1027	218.3	0
1028	218.4	1.75
1029	218.5	1.64
1030	218.6	0
1031	219.3	0
1032	219.4	1.16
1033	219.5	2.26
1034	219.6	8.15
1035	219.7	26.24
1036	219.8	47.22
1037	219.9	48.46
1038	220	20.92
1039	220.1	0
1040	220.4	0
1041	220.5	8.6
1042	220.6	7.16
1043	220.7	0
1044	221	0
1045	221.1	3.75
1046	221.2	12.63
1047	221.3	14.91
1048	221.4	12.24
1049	221.5	5.69
1050	221.6	0
1051	223.4	0
1052	223.5	18.56
1053	223.6	38.31
1054	223.7	55.2
1055	223.8	48.07
1056	223.9	16.32
1057	224	0
1058	224.1	0
1059	224.2	0.28
1060	224.3	7.29
1061	224.4	0.36
1062	224.5	0
1063	224.6	0
1064	224.7	28.54
1065	224.8	68.5
1066	224.9	96.84
1067	225	95.31
1068	225.1	67.31
1069	225.2	32.81
1070	225.3	10.71
1071	225.4	2.89
1072	225.5	0
1073	226	0
1074	226.1	6.31
1075	226.2	14.95
1076	226.3	10.38
1077	226.4	0
1078	229.5	0
1079	229.6	0.65
1080	229.7	0.68
1081	229.8	0
1082	230.2	0
1083	230.3	3.23
1084	230.4	1.76
1085	230.5	0
1086	231.3	0
1087	231.4	0.44
1088	231.5	1.07
1089	231.6	0.44
1090	231.7	0
1091	233.3	0
1092	233.4	4.51
1093	233.5	1.81
1094	233.6	0
1095	234.2	0
1096	234.3	0.77
1097	234.4	0.54
1098	234.5	0
1099	234.9	0
1100	235	9.58
1101	235.1	12.71
1102	235.2	10.56
1103	235.3	6.59
1104	235.4	2.03
1105	235.5	0
1106	235.6	2.45
1107	235.7	9.98
1108	235.8	14.26
1109	235.9	9.74
1110	236	0
1111	236.4	0
1112	236.5	2.2
1113	236.6	1.92
1114	236.7	0
1115	237.1	0
1116	237.2	13.63
1117	237.3	26.36
1118	237.4	19.14
1119	237.5	7.79
1120	237.6	0.89
1121	237.7	0
1122	239	0
1123	239.1	8.52
1124	239.2	26.97
1125	239.3	14.53
1126	239.4	2.66
1127	239.5	0
1128	240.6	0
1129	240.7	0.25
1130	240.8	0
1131	241.3	0
1132	241.4	0.73
1133	241.5	8.93
1134	241.6	10.79
1135	241.7	7.61
1136	241.8	0
1137	241.9	0
1138	242	5.46
1139	242.1	27.05
1140	242.2	40.98
1141	242.3	34.43
1142	242.4	17.02
1143	242.5	3.44
1144	242.6	0
1145	243	0
1146	243.1	12.63
1147	243.2	26.84
1148	243.3	31.45
1149	243.4	23.39
1150	243.5	8.77
1151	243.6	0
1152	244.2	0
1153	244.3	16.77
1154	244.4	25.41
1155	244.5	22.92
1156	244.6	9.3
1157	244.7	0
1158	245.2	0
1159	245.3	0.99
1160	245.4	6.28
1161	245.5	11.01
1162	245.6	10.46
1163	245.7	5.66
1164	245.8	3.24
1165	245.9	6.73
1166	246	11.67
1167	246.1	12.12
1168	246.2	8.32
1169	246.3	4.61
1170	246.4	2.5
1171	246.5	0
1172	246.7	0
1173	246.8	7.68
1174	246.9	19.7
1175	247	23.07
1176	247.1	14.95
1177	247.2	4.16
1178	247.3	0
1179	247.5	0
1180	247.6	0.23
1181	247.7	4.94
1182	247.8	11.12
1183	247.9	11.07
1184	248	2.2
1185	248.1	0
1186	248.3	0
1187	248.4	2.38
1188	248.5	2.5
1189	248.6	0
1190	248.8	0
1191	248.9	3.01
1192	249	12.16
1193	249.1	19.67
1194	249.2	16.89
1195	249.3	4.55
1196	249.4	0
1197	249.5	0
1198	249.6	2.42
1199	249.7	13.74
1200	249.8	22.04
1201	249.9	20.7
1202	250	0
1203	252.2	0
1204	252.3	13.84
1205	252.4	0
1206	252.7	0
1207	252.8	7.45
1208	252.9	65.34
1209	253	95.93
1210	253.1	78.3
1211	253.2	32.43
1212	253.3	0
1213	253.5	0
1214	253.6	1.82
1215	253.7	0.73
1216	253.8	0
1217	254.4	0
1218	254.5	4.29
1219	254.6	9.37
1220	254.7	10.19
1221	254.8	7.3
1222	254.9	2.63
1223	255	0
1224	255.7	0
1225	255.8	0.81
1226	255.9	0.19
1227	256	0
1228	256.1	0.42
1229	256.2	0.66
1230	256.3	0
1231	256.6	0
1232	256.7	1.32
1233	256.8	0
1234	257.4	0
1235	257.5	1.1
1236	257.6	3.51
1237	257.7	6.49
1238	257.8	9.05
1239	257.9	9
1240	258	6.12
1241	258.1	1.23
1242	258.2	0
1243	258.8	0
1244	258.9	1.2
1245	259	5.82
1246	259.1	6.14
1247	259.2	4.57
1248	259.3	2.03
1249	259.4	0
1250	259.6	0
1251	259.7	1.54
1252	259.8	2.13
1253	259.9	0.62
1254	260	0
1255	260.1	0
1256	260.2	1.49
1257	260.3	1.44
1258	260.4	0
1259	261.3	0
1260	261.4	1.34
1261	261.5	1.63
1262	261.6	1.61
1263	261.7	1.79
1264	261.8	0.69
1265	261.9	0
1266	263.5	0
1267	263.6	3.91
1268	263.7	8.47
1269	263.8	8.19
1270	263.9	0.33
1271	264	0
1272	265	0
1273	265.1	4.13
1274	265.2	1.7
1275	265.3	0
1276	265.4	0
1277	265.5	0.03
1278	265.6	0.77
1279	265.7	0
1280	266.3	0
1281	266.4	3.28
1282	266.5	9.35
1283	266.6	19.49
1284	266.7	41.19
1285	266.8	63.93
1286	266.9	62.04
1287	267	8.28
1288	267.1	0
1289	267.4	0
1290	267.5	2.63
1291	267.6	0
1292	268.2	0
1293	268.3	11.1
1294	268.4	8.77
1295	268.5	0
1296	269	0
1297	269.1	0.79
1298	269.2	9.24
1299	269.3	3.85
1300	269.4	0
1301	269.5	0
1302	269.6	2.05
1303	269.7	8.36
1304	269.8	12.01
1305	269.9	8.81
1306	270	0
1307	270.5	0
1308	270.6	0.15
1309	270.7	1.35
1310	270.8	1.72
1311	270.9	0.83
1312	271	0
1313	271.6	0
1314	271.7	0.04
1315	271.8	1.69
1316	271.9	2.94
1317	272	3.13
1318	272.1	1.57
1319	272.2	0
1320	272.4	0
1321	272.5	0.32
1322	272.6	10.37
1323	272.7	16.07
1324	272.8	5.62
1325	272.9	0
1326	273.3	0
1327	273.4	0.11
1328	273.5	0
1329	275	0
1330	275.1	14.43
1331	275.2	22.52
1332	275.3	14.08
1333	275.4	2.45
1334	275.5	0
1335	276.2	0
1336	276.3	2.76
1337	276.4	15.11
1338	276.5	31.86
1339	276.6	51.27
1340	276.7	60.33
1341	276.8	48.23
1342	276.9	23.13
1343	277	7.4
1344	277.1	12.25
1345	277.2	23.51
1346	277.3	21.39
1347	277.4	7.87
1348	277.5	0
1349	278.1	0
1350	278.2	0.8
1351	278.3	0
1352	279.4	0
1353	279.5	30.03
1354	279.6	41.39
1355	279.7	2.72
1356	279.8	0
1357	280.1	0
1358	280.2	2.11
1359	280.3	41.19
1360	280.4	31.58
1361	280.5	6.51
1362	280.6	0
1363	281.3	0
1364	281.4	11.08
1365	281.5	0
1366	282.5	0
1367	282.6	0.96
1368	282.7	8.25
1369	282.8	12.87
1370	282.9	14.86
1371	283	13.92
1372	283.1	10.8
1373	283.2	10.57
1374	283.3	14.07
1375	283.4	11.33
1376	283.5	0
1377	283.9	0
1378	284	8.69
1379	284.1	9.77
1380	284.2	0.55
1381	284.3	0
1382	284.4	3.09
1383	284.5	8.55
1384	284.6	4.64
1385	284.7	0
1386	285.3	0
1387	285.4	8.46
1388	285.5	14.55
1389	285.6	8.84
1390	285.7	1.46
1391	285.8	0
1392	286.6	0
1393	286.7	1.85
1394	286.8	2.63
1395	286.9	2.19
1396	287	0
1397	288.7	0
1398	288.8	0.16
1399	288.9	0.3
1400	289	0
1401	290.7	0
1402	290.8	0.42
1403	290.9	2.68
1404	291	3.67
1405	291.1	3.15
1406	291.2	1.82
1407	291.3	0.59
1408	291.4	0
1409	292.1	0
1410	292.2	0.36
1411	292.3	1.5
1412	292.4	1.09
1413	292.5	0
1414	292.8	0
1415	292.9	8.93
1416	293	13.95
1417	293.1	11.41
1418	293.2	5.23
1419	293.3	1.05
1420	293.4	0
1421	293.6	0
1422	293.7	0.05
1423	293.8	3.75
1424	293.9	8.43
1425	294	8.11
1426	294.1	0
1427	294.2	0
1428	294.3	28.48
1429	294.4	182.91
1430	294.5	577.53
1431	294.6	1200.4
1432	294.7	1964.05
1433	294.8	2710.09
1434	294.9	3220.05
1435	295	3337.29
1436	295.1	3062.77
1437	295.2	2497.16
1438	295.3	1739.94
1439	295.4	937.88
1440	295.5	338.5
1441	295.6	84.18
1442	295.7	94.85
1443	295.8	175.21
1444	295.9	240.18
1445	296	266.04
1446	296.1	252.65
1447	296.2	207.22
1448	296.3	138.5
1449	296.4	82.57
1450	296.5	57.75
1451	296.6	52.38
1452	296.7	37.5
1453	296.8	10.75
1454	296.9	9.58
1455	297	76.86
1456	297.1	184.96
1457	297.2	247.3
1458	297.3	193.73
1459	297.4	64.48
1460	297.5	0
1461	297.6	0
1462	297.7	63.56
1463	297.8	128.7
1464	297.9	100.09
1465	298	0
1466	298.4	0
1467	298.5	9.45
1468	298.6	19.36
1469	298.7	25.8
1470	298.8	32.32
1471	298.9	36.82
1472	299	34.2
1473	299.1	26.67
1474	299.2	19.92
1475	299.3	15.18
1476	299.4	9.48
1477	299.5	2.26
1478	299.6	0
1479	300	0
1480	300.1	6.47
1481	300.2	21.94
1482	300.3	35.46
1483	300.4	35.79
1484	300.5	20.15
1485	300.6	6.91
1486	300.7	19.63
1487	300.8	43.19
1488	300.9	37.96
1489	301	0
1490	301.4	0
1491	301.5	1.95
1492	301.6	0
1493	301.7	0
1494	301.8	0.82
1495	301.9	7.23
1496	302	8.82
1497	302.1	7.88
1498	302.2	5.8
1499	302.3	3.42
1500	302.4	1.99
1501	302.5	1.98
1502	302.6	2.36
1503	302.7	1.82
1504	302.8	0.32
1505	302.9	0
1506	303	0
1507	303.1	1.81
1508	303.2	3.71
1509	303.3	3.77
1510	303.4	2.49
1511	303.5	1.55
1512	303.6	1.87
1513	303.7	1.72
1514	303.8	2.15
1515	303.9	3.48
1516	304	4.31
1517	304.1	2.78
1518	304.2	0.01
1519	304.3	0
1520	304.6	0
1521	304.7	1.01
1522	304.8	12.26
1523	304.9	21.52
1524	305	18.18
1525	305.1	2.35
1526	305.2	0
1527	306.6	0
1528	306.7	2.33
1529	306.8	1.87
1530	306.9	0
1531	307.4	0
1532	307.5	0.33
1533	307.6	0.56
1534	307.7	0.27
1535	307.8	0.06
1536	307.9	0
1537	308.3	0
1538	308.4	1.31
1539	308.5	4.93
1540	308.6	12.14
1541	308.7	18.69
1542	308.8	17.32
1543	308.9	7.76
1544	309	0
1545	309.1	0.47
1546	309.2	5.51
1547	309.3	7.27
1548	309.4	4.34
1549	309.5	0
1550	310.4	0
1551	310.5	20.69
1552	310.6	25.28
1553	310.7	12.87
1554	310.8	1.54
1555	310.9	0
1556	311.2	0
1557	311.3	3.34
1558	311.4	3.77
1559	311.5	1.66
1560	311.6	4.41
1561	311.7	6.96
1562	311.8	16.75
1563	311.9	21.89
1564	312	18.02
1565	312.1	8.08
1566	312.2	0
1567	312.6	0
1568	312.7	0.74
1569	312.8	3.7
1570	312.9	7.54
1571	313	7.94
1572	313.1	3.83
1573	313.2	0.13
1574	313.3	0.95
1575	313.4	4.06
1576	313.5	4.87
1577	313.6	1.26
1578	313.7	0
1579	314	0
1580	314.1	10.05
1581	314.2	20.92
1582	314.3	16.07
1583	314.4	2.15
1584	314.5	0
1585	315	0
1586	315.1	1.3
1587	315.2	2.54
1588	315.3	2.29
1589	315.4	2.04
1590	315.5	1.88
1591	315.6	0
1592	317.3	0
1593	317.4	0.63
1594	317.5	1.44
1595	317.6	1.95
1596	317.7	1.39
1597	317.8	0
1598	318	0
1599	318.1	0
1600	318.2	4.31
1601	318.3	7.18
1602	318.4	5.37
1603	318.5	0
1604	318.7	0
1605	318.8	3.77
1606	318.9	11.61
1607	319	12.54
1608	319.1	7.95
1609	319.2	3.01
1610	319.3	0.42
1611	319.4	0.12
1612	319.5	0.88
1613	319.6	0.87
1614	319.7	0
1615	320	0
1616	320.1	0.62
1617	320.2	1.61
1618	320.3	1.52
1619	320.4	1.19
1620	320.5	2.36
1621	320.6	5.21
1622	320.7	7.68
1623	320.8	7.85
1624	320.9	5.92
1625	321	3.48
1626	321.1	2.36
1627	321.2	2.37
1628	321.3	1.65
1629	321.4	0
1630	322.4	0
1631	322.5	106.59
1632	322.6	85.49
1633	322.7	0
1634	323.1	0
1635	323.2	15.56
1636	323.3	12.15
1637	323.4	10.43
1638	323.5	10.6
1639	323.6	6.17
1640	323.7	0
1641	324.1	0
1642	324.2	5.16
1643	324.3	3.63
1644	324.4	0
1645	324.5	0
1646	324.6	7.28
1647	324.7	24.75
1648	324.8	26.94
1649	324.9	1.54
1650	325	0
1651	325.3	0
1652	325.4	0.2
1653	325.5	5.94
1654	325.6	7.73
1655	325.7	8.11
1656	325.8	6.23
1657	325.9	1.36
1658	326	0
1659	330.5	0
1660	330.6	16.38
1661	330.7	36.58
1662	330.8	47.74
1663	330.9	45.54
1664	331	33.04
1665	331.1	18.21
1666	331.2	8.23
1667	331.3	9.37
1668	331.4	15.03
1669	331.5	14.84
1670	331.6	7.73
1671	331.7	0
1672	331.9	0
1673	332	0.83
1674	332.1	6.57
1675	332.2	11.3
1676	332.3	11.86
1677	332.4	8.52
1678	332.5	4.74
1679	332.6	2.47
1680	332.7	0.18
1681	332.8	0
1682	333.2	0
1683	333.3	1.09
1684	333.4	1.54
1685	333.5	1.08
1686	333.6	1.71
1687	333.7	2.13
1688	333.8	2.04
1689	333.9	0.99
1690	334	0
1691	334.6	0
1692	334.7	1.85
1693	334.8	0.74
1694	334.9	0.97
1695	335	4.76
1696	335.1	9.67
1697	335.2	11.23
1698	335.3	7.17
1699	335.4	0
1700	335.7	0
1701	335.8	4.83
1702	335.9	11.37
1703	336	7.7
1704	336.1	0
1705	336.7	0
1706	336.8	2.89
1707	336.9	5.72
1708	337	6.06
1709	337.1	8.95
1710	337.2	14.67
1711	337.3	16.52
1712	337.4	4.53
1713	337.5	0
1714	338.3	0
1715	338.4	8.11
1716	338.5	0
1717	338.9	0
1718	339	16.29
1719	339.1	14.68
1720	339.2	0
1721	340.6	0
1722	340.7	1.78
1723	340.8	15.49
1724	340.9	19.91
1725	341	0
1726	341.4	0
1727	341.5	4.16
1728	341.6	6.08
1729	341.7	0.71
1730	341.8	0
1731	342	0
1732	342.1	6.56
1733	342.2	13.09
1734	342.3	12.92
1735	342.4	6.97
1736	342.5	1.98
1737	342.6	3.94
1738	342.7	9.56
1739	342.8	8.57
1740	342.9	0
1741	343.5	0
1742	343.6	6.15
1743	343.7	7.46
1744	343.8	6.35
1745	343.9	4.75
1746	344	2.6
1747	344.1	1.12
1748	344.2	0
1749	346.4	0
1750	346.5	1.69
1751	346.6	1.58
1752	346.7	0.03
1753	346.8	0
1754	349.4	0
1755	349.5	2.24
1756	349.6	1.06
1757	349.7	0
1758	350	0
1759	350.1	3.73
1760	350.2	7.26
1761	350.3	1.99
1762	350.4	0
1763	350.7	0
1764	350.8	1.2
1765	350.9	2.18
1766	351	0.43
1767	351.1	0
1768	352	0
1769	352.1	1.44
1770	352.2	1.38
1771	352.3	0
1772	352.8	0
1773	352.9	0.43
1774	353	2.15
1775	353.1	3.36
1776	353.2	2.85
1777	353.3	1.23
1778	353.4	0.15
1779	353.5	0.01
1780	353.6	0.14
1781	353.7	0.27
1782	353.8	0.78
1783	353.9	1.08
1784	354	0
1785	354.7	0
1786	354.8	2.03
1787	354.9	1.78
1788	355	0
1789	355.4	0
1790	355.5	2.29
1791	355.6	8.13
1792	355.7	11.41
1793	355.8	8.2
1794	355.9	1.08
1795	356	0
1796	356.1	0
1797	356.2	0.83
1798	356.3	7.89
1799	356.4	15.98
1800	356.5	26.8
1801	356.6	33.86
1802	356.7	24.84
1803	356.8	0
1804	357.1	0
1805	357.2	15.07
1806	357.3	24.07
1807	357.4	19.54
1808	357.5	11.34
1809	357.6	4.92
1810	357.7	3.6
1811	357.8	8.1
1812	357.9	12.64
1813	358	10.74
1814	358.1	3.6
1815	358.2	0
1816	358.6	0
1817	358.7	0.03
1818	358.8	0
1819	359	0
1820	359.1	1.39
1821	359.2	2.86
1822	359.3	2.6
1823	359.4	1.22
1824	359.5	0.47
1825	359.6	0.89
1826	359.7	1.32
1827	359.8	0.51
1828	359.9	0
1829	360.4	0
1830	360.5	0.45
1831	360.6	2.04
1832	360.7	1.99
1833	360.8	0
1834	361	0
1835	361.1	0.86
1836	361.2	9.53
1837	361.3	11.64
1838	361.4	6.32
1839	361.5	0
1840	361.7	0
1841	361.8	0.49
1842	361.9	11.4
1843	362	24.95
1844	362.1	29.89
1845	362.2	20.27
1846	362.3	4.46
1847	362.4	0
1848	362.5	0
1849	362.6	0.81
1850	362.7	5.77
1851	362.8	8.84
1852	362.9	8.21
1853	363	3.46
1854	363.1	0
1855	363.2	1.84
1856	363.3	10.09
1857	363.4	14.68
1858	363.5	10.47
1859	363.6	1.73
1860	363.7	0
1861	364	0
1862	364.1	2.24
1863	364.2	4.95
1864	364.3	4.84
1865	364.4	1.92
1866	364.5	0
1867	364.7	0
1868	364.8	0.63
1869	364.9	0
1870	365.3	0
1871	365.4	0.81
1872	365.5	1.44
1873	365.6	1.57
1874	365.7	0
1875	366	0
1876	366.1	2.12
1877	366.2	14.81
1878	366.3	11.48
1879	366.4	2.47
1880	366.5	0
1881	367.2	0
1882	367.3	0.47
1883	367.4	0.61
1884	367.5	0
1885	369.4	0
1886	369.5	0.83
1887	369.6	8.57
1888	369.7	21.94
1889	369.8	40.76
1890	369.9	51.97
1891	370	47.89
1892	370.1	31.75
1893	370.2	6.41
1894	370.3	0
1895	371.4	0
1896	371.5	3.32
1897	371.6	47.94
1898	371.7	47.7
1899	371.8	29.13
1900	371.9	0
1901	373.6	0
1902	373.7	22.98
1903	373.8	49.54
1904	373.9	71.9
1905	374	84.66
1906	374.1	81.79
1907	374.2	65.98
1908	374.3	49.03
1909	374.4	5.84
1910	374.5	0
1911	375.8	0
1912	375.9	12.1
1913	376	0
1914	376.5	0
1915	376.6	8.49
1916	376.7	6.42
1917	376.8	0
1918	377.4	0
1919	377.5	1.55
1920	377.6	0
1921	377.9	0
1922	378	0.36
1923	378.1	19.01
1924	378.2	17.19
1925	378.3	3.52
1926	378.4	0
1927	379.4	0
1928	379.5	2.99
1929	379.6	2.22
1930	379.7	0.15
1931	379.8	0
1932	380.1	0
1933	380.2	0.56
1934	380.3	1.22
1935	380.4	1.34
1936	380.5	0.55
1937	380.6	0
1938	380.7	0.15
1939	380.8	0.89
1940	380.9	0
1941	381.3	0
1942	381.4	0.13
1943	381.5	0
1944	381.6	0
1945	381.7	0.85
1946	381.8	0.89
1947	381.9	0
1948	382.4	0
1949	382.5	0.4
1950	382.6	6.62
1951	382.7	10.95
1952	382.8	14.43
1953	382.9	16.08
1954	383	12.6
1955	383.1	3.73
1956	383.2	0
1957	384.1	0
1958	384.2	1.17
1959	384.3	1.23
1960	384.4	0
1961	384.5	0.71
1962	384.6	1.58
1963	384.7	0.59
1964	384.8	0
1965	385.1	0
1966	385.2	10.14
1967	385.3	25.21
1968	385.4	17.26
1969	385.5	3.83
1970	385.6	0
1971	386.3	0
1972	386.4	1.76
1973	386.5	2.97
1974	386.6	2.38
1975	386.7	0
1976	387.4	0
1977	387.5	0.82
1978	387.6	5.78
1979	387.7	6.38
1980	387.8	0
1981	388.3	0
1982	388.4	1.31
1983	388.5	5.79
1984	388.6	5.03
1985	388.7	0
1986	389.1	0
1987	389.2	0.54
1988	389.3	3.28
1989	389.4	2.22
1990	389.5	0.32
1991	389.6	0.82
1992	389.7	4.82
1993	389.8	8.83
1994	389.9	7.28
1995	390	0
1996	390.3	0
1997	390.4	1.5
[truncated: 1,356 more rows]

## Sheet: Sheet5
+ESI Scan (rt: 17.62-17.87 min, 55 scans) Frag=100.0V CF=0.000 DF=0.000 Blank-r003.d Subtract
Index	X	Y
0	50	0
1	51.2	0
2	51.3	0.28
3	51.4	0.68
4	51.5	0.76
5	51.6	0.51
6	51.7	0.12
7	51.8	0
8	52.5	0
9	52.6	0.1
10	52.7	0.37
11	52.8	0.21
12	52.9	0
13	53.1	0
14	53.2	0.07
15	53.3	0.4
16	53.4	0.31
17	53.5	0
18	54.3	0
19	54.4	0.26
20	54.5	0.85
21	54.6	1.39
22	54.7	1.79
23	54.8	1.87
24	54.9	1.51
25	55	0.81
26	55.1	0.03
27	55.2	0
28	56	0
29	56.1	1.41
30	56.2	0.96
31	56.3	0
32	57	0
33	57.1	14.51
34	57.2	28.2
35	57.3	29.06
36	57.4	16.04
37	57.5	0
38	57.7	0
39	57.8	16.39
40	57.9	33.28
41	58	26.1
42	58.1	0
43	58.5	0
44	58.6	14.23
45	58.7	46.85
46	58.8	66.91
47	58.9	58.3
48	59	25.16
49	59.1	0
50	59.4	0
51	59.5	16.46
52	59.6	29.24
53	59.7	17.51
54	59.8	0
55	60	0
56	60.1	4.91
57	60.2	14.64
58	60.3	0
59	61.3	0
60	61.4	7.82
61	61.5	7.61
62	61.6	3.94
63	61.7	0.48
64	61.8	0
65	62.3	0
66	62.4	0.15
67	62.5	0.61
68	62.6	0.82
69	62.7	0.73
70	62.8	0.49
71	62.9	0.35
72	63	0.21
73	63.1	0
74	63.5	0
75	63.6	1.39
76	63.7	8.23
77	63.8	17.42
78	63.9	22.11
79	64	18.27
80	64.1	10.15
81	64.2	5.86
82	64.3	8.07
83	64.4	11.54
84	64.5	10.31
85	64.6	4.9
86	64.7	0.4
87	64.8	0
88	64.9	0.38
89	65	0.94
90	65.1	0.94
91	65.2	0.79
92	65.3	0.43
93	65.4	0
94	65.6	0
95	65.7	0.29
96	65.8	0.35
97	65.9	0.21
98	66	0.24
99	66.1	0.47
100	66.2	0.63
101	66.3	0.52
102	66.4	0.14
103	66.5	0
104	66.7	0
105	66.8	0.04
106	66.9	0.22
107	67	0.05
108	67.1	0
109	67.4	0
110	67.5	0.27
111	67.6	0.76
112	67.7	1.05
113	67.8	0.99
114	67.9	0.74
115	68	0.47
116	68.1	0.24
117	68.2	0
118	68.7	0
119	68.8	1.13
120	68.9	1.7
121	69	0.74
122	69.1	0
123	69.3	0
124	69.4	1.17
125	69.5	1.78
126	69.6	0.84
127	69.7	0
128	71	0
129	71.1	9.94
130	71.2	23.81
131	71.3	28.39
132	71.4	18.95
133	71.5	4.67
134	71.6	0
135	72.3	0
136	72.4	4.02
137	72.5	6.37
138	72.6	0.75
139	72.7	0
140	73.4	0
141	73.5	0.59
142	73.6	7.69
143	73.7	4.06
144	73.8	0.34
145	73.9	1.91
146	74	5.44
147	74.1	4.14
148	74.2	0
149	74.5	0
150	74.6	0.39
151	74.7	1.1
152	74.8	4.75
153	74.9	9.55
154	75	11.59
155	75.1	10.1
156	75.2	7.03
157	75.3	3.81
158	75.4	1.1
159	75.5	0
160	76.1	0
161	76.2	0.04
162	76.3	1.12
163	76.4	2.65
164	76.5	3.5
165	76.6	2.83
166	76.7	0.31
167	76.8	0
168	77.3	0
169	77.4	2.69
170	77.5	1.41
171	77.6	0
172	77.7	0
173	77.8	0.2
174	77.9	0.38
175	78	0.14
176	78.1	0
177	78.8	0
178	78.9	1.88
179	79	7.22
180	79.1	4.69
181	79.2	0
182	79.8	0
183	79.9	2.37
184	80	15.44
185	80.1	26.17
186	80.2	24.75
187	80.3	9.88
188	80.4	0
189	80.5	0
190	80.6	7.69
191	80.7	32.29
192	80.8	30.39
193	80.9	0
194	81.1	0
195	81.2	27.11
196	81.3	65.81
197	81.4	43.4
198	81.5	1.39
199	81.6	0
200	82.5	0
201	82.6	4.72
202	82.7	16.15
203	82.8	23.93
204	82.9	24.54
205	83	24
206	83.1	27.55
207	83.2	30.81
208	83.3	24.09
209	83.4	11.85
210	83.5	1.93
211	83.6	0
212	83.8	0
213	83.9	0.57
214	84	0.34
215	84.1	0
216	84.3	0
217	84.4	0.74
218	84.5	1.43
219	84.6	0
220	85	0
221	85.1	6.95
222	85.2	11.78
223	85.3	8.69
224	85.4	2.35
225	85.5	0
226	86	0
227	86.1	0.09
228	86.2	0.1
229	86.3	0
230	86.5	0
231	86.6	0.37
232	86.7	3.68
233	86.8	5.12
234	86.9	3.67
235	87	1.8
236	87.1	1.63
237	87.2	2.23
238	87.3	1.64
239	87.4	0
240	88	0
241	88.1	0.49
242	88.2	3.29
243	88.3	2.61
244	88.4	0.94
245	88.5	4.65
246	88.6	5.52
247	88.7	0
248	88.9	0
249	89	36.45
250	89.1	77.47
251	89.2	68.51
252	89.3	27.87
253	89.4	0
254	89.6	0
255	89.7	0.02
256	89.8	0.95
257	89.9	0
258	90.6	0
259	90.7	2.51
260	90.8	8.17
261	90.9	12.67
262	91	11.32
263	91.1	4.29
264	91.2	0
265	91.6	0
266	91.7	0.16
267	91.8	0.53
268	91.9	0.79
269	92	0.69
270	92.1	0.44
271	92.2	0.45
272	92.3	0.75
273	92.4	1.05
274	92.5	0.93
275	92.6	0.11
276	92.7	0
277	92.8	0
278	92.9	0.99
279	93	4.08
280	93.1	6.48
281	93.2	6.91
282	93.3	5.35
283	93.4	2.77
284	93.5	0.51
285	93.6	0
286	93.8	0
287	93.9	0.47
288	94	1.1
289	94.1	1.22
290	94.2	0.54
291	94.3	0
292	94.5	0
293	94.6	1.35
294	94.7	2.92
295	94.8	2.94
296	94.9	1.87
297	95	1.26
298	95.1	1.86
299	95.2	2.91
300	95.3	3.31
301	95.4	2.86
302	95.5	2.25
303	95.6	1.93
304	95.7	1.67
305	95.8	1.25
306	95.9	0.84
307	96	0.47
308	96.1	0
309	96.7	0
310	96.8	11.05
311	96.9	25.13
312	97	31.48
313	97.1	29.13
314	97.2	24.21
315	97.3	20.24
316	97.4	12.13
317	97.5	2.4
318	97.6	0
319	98	0
320	98.1	18.35
321	98.2	45.78
322	98.3	37.88
323	98.4	11.58
324	98.5	0
325	98.6	17.09
326	98.7	34.59
327	98.8	48.24
328	98.9	52.08
329	99	43.03
330	99.1	10.62
331	99.2	0
332	99.6	0
333	99.7	17.09
334	99.8	53.74
335	99.9	85.67
336	100	82.18
337	100.1	48.4
338	100.2	18.25
339	100.3	13.12
340	100.4	28.16
341	100.5	54.89
342	100.6	83.58
343	100.7	105.19
344	100.8	113.73
345	100.9	137.77
346	101	196.15
347	101.1	259.16
348	101.2	261.08
349	101.3	180.06
350	101.4	53.13
351	101.5	0
352	102.8	0
353	102.9	15.7
354	103	24.03
355	103.1	20.9
356	103.2	13.48
357	103.3	11.55
358	103.4	5.29
359	103.5	0
360	104.4	0
361	104.5	7.8
362	104.6	15.21
363	104.7	1.02
364	104.8	0
365	105.5	0
366	105.6	41.75
367	105.7	76.9
368	105.8	63.71
369	105.9	37.64
370	106	47.73
371	106.1	77.52
372	106.2	69.76
373	106.3	17.59
374	106.4	0
375	107.3	0
376	107.4	14.97
377	107.5	35.11
378	107.6	30.48
379	107.7	0
380	108.1	0
381	108.2	13.16
382	108.3	38.37
383	108.4	2.41
384	108.5	0
385	108.8	0
386	108.9	31.82
387	109	24.11
388	109.1	0
389	109.5	0
390	109.6	4.51
391	109.7	7.61
392	109.8	0
393	110.1	0
394	110.2	0.72
395	110.3	0
396	110.4	7.41
397	110.5	53.12
398	110.6	110.94
399	110.7	162.3
400	110.8	224.41
401	110.9	306.68
402	111	377.59
403	111.1	388.1
404	111.2	325.27
405	111.3	216.97
406	111.4	107.73
407	111.5	30.22
408	111.6	9.3
409	111.7	18.56
410	111.8	21.41
411	111.9	7.08
412	112	0
413	112.6	0
414	112.7	32.63
415	112.8	74
416	112.9	96.71
417	113	90.83
418	113.1	66.37
419	113.2	38.64
420	113.3	15.17
421	113.4	0
422	114.5	0
423	114.6	65.71
424	114.7	78.56
425	114.8	51.3
426	114.9	15.8
427	115	0
428	115.1	18.5
429	115.2	38.91
430	115.3	31.67
431	115.4	9.11
432	115.5	20.04
433	115.6	39.32
434	115.7	0
435	116	0
436	116.1	43.62
437	116.2	43.28
438	116.3	0
439	117.7	0
440	117.8	5.03
441	117.9	11.23
442	118	12.89
443	118.1	11.66
444	118.2	8.45
445	118.3	4.42
446	118.4	0.88
447	118.5	0
448	118.8	0
449	118.9	6.53
450	119	12.65
451	119.1	10.53
452	119.2	1.57
453	119.3	0
454	119.9	0
455	120	10.58
456	120.1	22.02
457	120.2	23.69
458	120.3	15.33
459	120.4	5.96
460	120.5	1
461	120.6	0.42
462	120.7	2.54
463	120.8	1.99
464	120.9	4.54
465	121	14.2
466	121.1	23.23
467	121.2	14.26
468	121.3	0
469	121.5	0
470	121.6	16.7
471	121.7	0
472	121.8	0
473	121.9	49.08
474	122	136.34
475	122.1	175.01
476	122.2	137.2
477	122.3	65.79
478	122.4	15.41
479	122.5	0
480	123.1	0
481	123.2	2.97
482	123.3	47.48
483	123.4	71.39
484	123.5	65.9
485	123.6	36.02
486	123.7	2.33
487	123.8	0
488	124.5	0
489	124.6	11.16
490	124.7	21.81
491	124.8	3.77
492	124.9	0
493	125	2.64
494	125.1	40.78
495	125.2	68.78
496	125.3	66.06
497	125.4	41.09
498	125.5	12.42
499	125.6	0
500	125.7	0
501	125.8	5.76
502	125.9	17.05
503	126	8.91
504	126.1	1.01
505	126.2	16.26
506	126.3	41.46
507	126.4	44.3
508	126.5	22.04
509	126.6	1.88
510	126.7	6.23
511	126.8	17.11
512	126.9	14.88
513	127	0
514	127.3	0
515	127.4	54.47
516	127.5	185.93
517	127.6	333.39
518	127.7	331.69
519	127.8	135.47
520	127.9	0
521	128.3	0
522	128.4	9.64
523	128.5	84.27
524	128.6	163.9
525	128.7	222.08
526	128.8	293.77
527	128.9	370.08
528	129	406.97
529	129.1	376.29
530	129.2	283.49
531	129.3	161.94
532	129.4	51.69
533	129.5	1.57
534	129.6	16.11
535	129.7	46.01
536	129.8	38.67
537	129.9	0
538	130.5	0
539	130.6	47.47
540	130.7	57.52
541	130.8	45.79
542	130.9	50.94
543	131	49.06
544	131.1	45.44
545	131.2	47.46
546	131.3	54.04
547	131.4	52.98
548	131.5	37.14
549	131.6	24.12
550	131.7	18.63
551	131.8	16.9
552	131.9	10.96
553	132	0.47
554	132.1	0
555	132.8	0
556	132.9	2.05
557	133	0
558	133.3	0
559	133.4	13.66
560	133.5	25.19
561	133.6	26.53
562	133.7	14.82
563	133.8	1.77
564	133.9	2.82
565	134	15.56
566	134.1	28.16
567	134.2	36.55
568	134.3	41.92
569	134.4	40.16
570	134.5	27.59
571	134.6	13.64
572	134.7	10.48
573	134.8	11.41
574	134.9	6.41
575	135	0
576	135.5	0
577	135.6	45.33
578	135.7	110.14
579	135.8	163.55
580	135.9	163.86
581	136	84
582	136.1	0
583	137.2	0
584	137.3	13.49
585	137.4	0
586	138.2	0
587	138.3	2.86
588	138.4	0
589	138.6	0
590	138.7	2.54
591	138.8	23.84
592	138.9	42.06
593	139	30.08
594	139.1	0
595	140.4	0
596	140.5	29.14
597	140.6	43.02
598	140.7	5.14
599	140.8	0
600	141	0
601	141.1	46.13
602	141.2	50.47
603	141.3	5.01
604	141.4	0
605	142	0
606	142.1	52.85
607	142.2	103.47
608	142.3	121.68
609	142.4	107.28
610	142.5	86.05
611	142.6	76.19
612	142.7	82.47
613	142.8	82.02
614	142.9	52.06
615	143	0
616	143.7	0
617	143.8	2.13
618	143.9	0
619	144.1	0
620	144.2	63.67
621	144.3	136.95
622	144.4	155.66
623	144.5	110.72
624	144.6	49.68
625	144.7	21.66
626	144.8	26.64
627	144.9	30.45
628	145	10.99
629	145.1	0
630	145.2	0
631	145.3	4.21
632	145.4	16.12
633	145.5	16.74
634	145.6	7.19
635	145.7	11.37
636	145.8	11.71
637	145.9	3.9
638	146	0
639	146.1	0
640	146.2	13.08
641	146.3	38.47
642	146.4	63.36
643	146.5	86.69
644	146.6	120.48
645	146.7	180.48
646	146.8	241.26
647	146.9	264.24
648	147	251.54
649	147.1	231.48
650	147.2	207.1
651	147.3	158.16
652	147.4	88.07
653	147.5	36.46
654	147.6	15.21
655	147.7	23
656	147.8	38.5
657	147.9	40.46
658	148	37.22
659	148.1	30.64
660	148.2	13.42
661	148.3	0
662	149.3	0
663	149.4	70.85
664	149.5	92.21
665	149.6	30.7
666	149.7	0.12
667	149.8	11.34
668	149.9	41.82
669	150	82.65
670	150.1	131.91
671	150.2	171.69
672	150.3	172.73
673	150.4	114.27
674	150.5	22.5
675	150.6	0
676	150.8	0
677	150.9	65.68
678	151	72.07
679	151.1	18.82
680	151.2	0
681	151.3	0
682	151.4	1.67
683	151.5	7.4
684	151.6	0
685	151.8	0
686	151.9	13.71
687	152	21.88
688	152.1	20.66
689	152.2	14.97
690	152.3	14.01
691	152.4	19.4
692	152.5	22.14
693	152.6	3.22
694	152.7	0
695	152.9	0
696	153	28.45
697	153.1	58.95
698	153.2	86.16
699	153.3	104.6
700	153.4	112.5
701	153.5	116.47
702	153.6	114.64
703	153.7	95.94
704	153.8	69.34
705	153.9	39.88
706	154	15.24
707	154.1	0
708	154.2	0
709	154.3	4.04
710	154.4	18.81
711	154.5	28.23
712	154.6	37.88
713	154.7	47.75
714	154.8	49.09
715	154.9	39.07
716	155	23.65
717	155.1	13.66
718	155.2	4
719	155.3	0
720	155.4	0
721	155.5	2.67
722	155.6	8.64
723	155.7	6.23
724	155.8	0.39
725	155.9	0
726	156	3.7
727	156.1	21.5
728	156.2	42.24
729	156.3	52.43
730	156.4	44.34
731	156.5	24.69
732	156.6	7.1
733	156.7	0
734	158.2	0
735	158.3	45.77
736	158.4	63.86
737	158.5	62.86
738	158.6	71.37
739	158.7	54.31
740	158.8	16.32
741	158.9	0
742	159.1	0
743	159.2	6.17
744	159.3	7
745	159.4	1.76
746	159.5	0
747	160.1	0
748	160.2	0.57
749	160.3	2.76
750	160.4	4.37
751	160.5	3.49
752	160.6	0
753	160.9	0
754	161	2.28
755	161.1	3.02
756	161.2	0
757	161.6	0
758	161.7	5.83
759	161.8	17.19
760	161.9	28.62
761	162	31.1
762	162.1	20
763	162.2	4.41
764	162.3	0
765	162.4	0
766	162.5	1.56
767	162.6	16.52
768	162.7	27.22
769	162.8	19.21
770	162.9	0
771	163.5	0
772	163.6	8.55
773	163.7	23.78
774	163.8	39.96
775	163.9	51
776	164	50.45
777	164.1	37.19
778	164.2	6.01
779	164.3	0
780	165.5	0
781	165.6	8.88
782	165.7	21.38
783	165.8	27.02
784	165.9	22.42
785	166	7.08
786	166.1	0
787	167.4	0
788	167.5	3.63
789	167.6	2.66
790	167.7	0
791	168.4	0
792	168.5	7.96
793	168.6	15.43
794	168.7	12.65
795	168.8	5.01
796	168.9	0
797	169.4	0
798	169.5	11.17
799	169.6	15.83
800	169.7	10.42
801	169.8	3.68
802	169.9	6.22
803	170	14.97
804	170.1	19.09
805	170.2	16.03
806	170.3	9.2
807	170.4	0
808	170.6	0
809	170.7	2.04
810	170.8	8.88
811	170.9	3.48
812	171	0
813	171.3	0
814	171.4	7.91
815	171.5	38.32
816	171.6	45.67
817	171.7	22.28
818	171.8	0
819	171.9	0
820	172	7.22
821	172.1	22.57
822	172.2	19.77
823	172.3	4.66
824	172.4	0.98
825	172.5	6.25
826	172.6	7.68
827	172.7	7.25
828	172.8	2.62
829	172.9	0
830	173.4	0
831	173.5	3.47
832	173.6	5.23
833	173.7	0
834	175.8	0
835	175.9	6.16
836	176	7.64
837	176.1	0
838	176.4	0
839	176.5	20.18
840	176.6	37.32
841	176.7	42
842	176.8	33.15
843	176.9	12.96
844	177	0
845	177.1	0
846	177.2	20.1
847	177.3	36.26
848	177.4	27.88
849	177.5	11.94
850	177.6	6.35
851	177.7	7
852	177.8	0
853	178	0
854	178.1	7.16
855	178.2	20.11
856	178.3	16.23
857	178.4	1.52
858	178.5	0
859	179.1	0
860	179.2	12.43
861	179.3	8.36
862	179.4	0
863	179.5	0
864	179.6	12.62
865	179.7	13.12
866	179.8	0
867	180.2	0
868	180.3	15.66
869	180.4	16.58
870	180.5	16.36
871	180.6	22.18
872	180.7	27.11
873	180.8	18.64
874	180.9	0.85
875	181	0
876	181.6	0
877	181.7	7.83
878	181.8	18.16
879	181.9	22.69
880	182	22.8
881	182.1	16.09
882	182.2	0
883	183.4	0
884	183.5	1.76
885	183.6	15.2
886	183.7	13.91
887	183.8	9.01
888	183.9	0.17
889	184	0
890	185.5	0
891	185.6	14.45
892	185.7	40.47
893	185.8	51.43
894	185.9	26.69
895	186	0
896	186.5	0
897	186.6	7.72
898	186.7	9.63
899	186.8	5.05
900	186.9	0
901	187.6	0
902	187.7	0.06
903	187.8	8.34
904	187.9	14.53
905	188	10.67
906	188.1	0
907	188.4	0
908	188.5	3.4
909	188.6	4.23
910	188.7	1.79
911	188.8	0
912	188.9	4.43
913	189	12.9
914	189.1	15.02
915	189.2	9.11
916	189.3	2.46
917	189.4	0
918	190.3	0
919	190.4	2.87
920	190.5	4.89
921	190.6	3.58
922	190.7	2.62
923	190.8	1.4
924	190.9	0
925	191.1	0
926	191.2	1.29
927	191.3	1.53
928	191.4	1.71
929	191.5	6.7
930	191.6	10.94
931	191.7	5.89
932	191.8	0
933	192.3	0
934	192.4	2.18
935	192.5	3.86
936	192.6	0
937	193.1	0
938	193.2	6.66
939	193.3	30.24
940	193.4	33.47
941	193.5	20.73
942	193.6	12.02
943	193.7	22.26
944	193.8	43.96
945	193.9	58.36
946	194	55.19
947	194.1	37.71
948	194.2	18.97
949	194.3	6.82
950	194.4	0
951	195.9	0
952	196	16.83
953	196.1	27.23
954	196.2	22.09
955	196.3	16.58
956	196.4	20.65
957	196.5	29.75
958	196.6	35.15
959	196.7	36.35
960	196.8	37.19
961	196.9	35.24
962	197	27.54
963	197.1	19.72
964	197.2	17.51
965	197.3	17.11
966	197.4	7.21
967	197.5	0
968	198.4	0
969	198.5	1.44
970	198.6	0
971	199.1	0
972	199.2	1.74
973	199.3	0
974	200.4	0
975	200.5	5.97
976	200.6	6.41
977	200.7	0
978	201.4	0
979	201.5	5.83
980	201.6	20.65
981	201.7	27.37
982	201.8	24.23
983	201.9	13.72
984	202	2.83
985	202.1	0
986	202.3	0
987	202.4	2.55
988	202.5	0.36
989	202.6	0
990	202.9	0
991	203	5.68
992	203.1	26.5
993	203.2	23.78
994	203.3	8.4
995	203.4	2.69
996	203.5	11.54
997	203.6	18.66
998	203.7	18.62
999	203.8	13.24
1000	203.9	5.53
1001	204	0
1002	204.3	0
1003	204.4	5.56
1004	204.5	0
1005	204.9	0
1006	205	38.09
1007	205.1	128.66
1008	205.2	149.5
1009	205.3	99.86
1010	205.4	29.72
1011	205.5	8.96
1012	205.6	8.1
1013	205.7	0
1014	205.9	0
1015	206	4.65
1016	206.1	60.68
1017	206.2	82.9
1018	206.3	63.47
1019	206.4	32.63
1020	206.5	14.9
1021	206.6	8.16
1022	206.7	5.85
1023	206.8	4.69
1024	206.9	0.24
1025	207	0
1026	208.3	0
1027	208.4	4.83
1028	208.5	12.4
1029	208.6	9.15
1030	208.7	0
1031	210.8	0
1032	210.9	6.15
1033	211	36.34
1034	211.1	55.1
1035	211.2	46.97
1036	211.3	21.5
1037	211.4	3.33
1038	211.5	2.52
1039	211.6	10.59
1040	211.7	10.09
1041	211.8	0
1042	212.1	0
1043	212.2	19.65
1044	212.3	36.78
1045	212.4	29.77
1046	212.5	10.56
1047	212.6	0
1048	213	0
1049	213.1	4.58
1050	213.2	6.68
1051	213.3	6.92
1052	213.4	10.95
1053	213.5	19.34
1054	213.6	26.36
1055	213.7	22.35
1056	213.8	8.34
1057	213.9	0
1058	214.4	0
1059	214.5	7.82
1060	214.6	30.36
1061	214.7	37.53
1062	214.8	48.28
1063	214.9	64.43
1064	215	71.5
1065	215.1	53.96
1066	215.2	19.55
1067	215.3	0
1068	215.6	0
1069	215.7	2.63
1070	215.8	2.66
1071	215.9	0
1072	216	0
1073	216.1	1.25
1074	216.2	4.55
1075	216.3	1.96
1076	216.4	0
1077	216.7	0
1078	216.8	3.91
1079	216.9	0
1080	217.4	0
1081	217.5	5.67
1082	217.6	4.61
1083	217.7	2.05
1084	217.8	1.67
1085	217.9	1.85
1086	218	0.81
1087	218.1	0
1088	218.9	0
1089	219	2.16
1090	219.1	9.61
1091	219.2	12.13
1092	219.3	11.08
1093	219.4	1.34
1094	219.5	0
1095	219.6	0
1096	219.7	1.44
1097	219.8	33.51
1098	219.9	61.14
1099	220	64.73
1100	220.1	39.55
1101	220.2	3.24
1102	220.3	0
1103	221.1	0
1104	221.2	1.69
1105	221.3	0.82
1106	221.4	0
1107	221.6	0
1108	221.7	1.61
1109	221.8	1.55
1110	221.9	0.25
1111	222	4.01
1112	222.1	8.29
1113	222.2	6.74
1114	222.3	5.87
1115	222.4	15.96
1116	222.5	21.53
1117	222.6	26.12
1118	222.7	49.77
1119	222.8	83.36
1120	222.9	89.49
1121	223	43.52
1122	223.1	0
1123	223.4	0
1124	223.5	21.23
1125	223.6	21.86
1126	223.7	9.59
1127	223.8	4.03
1128	223.9	8.57
1129	224	16.76
1130	224.1	21.05
1131	224.2	18.08
1132	224.3	4
1133	224.4	0
1134	226	0
1135	226.1	18.07
1136	226.2	23.71
1137	226.3	18.69
1138	226.4	7.28
1139	226.5	0
1140	227.3	0
1141	227.4	12.07
1142	227.5	24.5
1143	227.6	29.35
1144	227.7	30.57
1145	227.8	34.45
1146	227.9	32.99
1147	228	15.48
1148	228.1	0
1149	228.3	0
1150	228.4	17.94
1151	228.5	26.8
1152	228.6	15.57
1153	228.7	3.22
1154	228.8	0.99
1155	228.9	6.03
1156	229	11.02
1157	229.1	12.14
1158	229.2	9.77
1159	229.3	6.64
1160	229.4	4.8
1161	229.5	3.41
1162	229.6	0.92
1163	229.7	0
1164	230.8	0
1165	230.9	4.81
1166	231	11.17
1167	231.1	11.41
1168	231.2	5.7
1169	231.3	0
1170	231.8	0
1171	231.9	3.65
1172	232	9.19
1173	232.1	7.65
1174	232.2	0
1175	235.7	0
1176	235.8	0.67
1177	235.9	0
1178	236.2	0
1179	236.3	1.65
1180	236.4	2.42
1181	236.5	1.23
1182	236.6	0
1183	237.1	0
1184	237.2	0.3
1185	237.3	0
1186	238.1	0
1187	238.2	0.54
1188	238.3	3.86
1189	238.4	3.58
1190	238.5	0
1191	239.1	0
1192	239.2	3.91
1193	239.3	7.79
1194	239.4	7.66
1195	239.5	3.85
1196	239.6	0
1197	239.7	0
1198	239.8	0.81
1199	239.9	0.23
1200	240	0
1201	240.2	0
1202	240.3	26.24
1203	240.4	56.07
1204	240.5	65.58
1205	240.6	60.85
1206	240.7	63.99
1207	240.8	91.82
1208	240.9	121.47
1209	241	119.72
1210	241.1	81.22
1211	241.2	36.32
1212	241.3	11.22
1213	241.4	0.93
1214	241.5	0
1215	241.6	4.02
1216	241.7	12.43
1217	241.8	14.86
1218	241.9	10.98
1219	242	4.86
1220	242.1	0
1221	242.4	0
1222	242.5	8.33
1223	242.6	0.68
1224	242.7	0
1225	243	0
1226	243.1	12.6
1227	243.2	20.89
1228	243.3	20.81
1229	243.4	12.65
1230	243.5	2.94
1231	243.6	2.31
1232	243.7	13.33
1233	243.8	25.78
1234	243.9	29.59
1235	244	27.36
1236	244.1	24.36
1237	244.2	20.98
1238	244.3	13.33
1239	244.4	4.23
1240	244.5	0
1241	244.6	0.17
1242	244.7	7.66
1243	244.8	17.53
1244	244.9	22.07
1245	245	17.58
1246	245.1	7.82
1247	245.2	0
1248	245.4	0
1249	245.5	1.32
1250	245.6	4.2
1251	245.7	6.24
1252	245.8	8.05
1253	245.9	11.57
1254	246	16.12
1255	246.1	17.13
1256	246.2	12.21
1257	246.3	4.78
1258	246.4	0
1259	247	0
1260	247.1	0.68
1261	247.2	0
1262	247.4	0
1263	247.5	2.23
1264	247.6	7.93
1265	247.7	6.99
1266	247.8	4.51
1267	247.9	13.51
1268	248	30.41
1269	248.1	38.76
1270	248.2	30.21
1271	248.3	13.28
1272	248.4	0
1273	249.2	0
1274	249.3	6.17
1275	249.4	3.47
1276	249.5	0
1277	249.7	0
1278	249.8	4.04
1279	249.9	9.72
1280	250	6.43
1281	250.1	9.04
1282	250.2	6.44
1283	250.3	0
1284	251.4	0
1285	251.5	78.6
1286	251.6	207.97
1287	251.7	225.32
1288	251.8	141.25
1289	251.9	24.49
1290	252	0
1291	252.7	0
1292	252.8	8.08
1293	252.9	12.69
1294	253	9.46
1295	253.1	4.74
1296	253.2	2.98
1297	253.3	2.4
1298	253.4	0.96
1299	253.5	0
1300	255.3	0
1301	255.4	12.64
1302	255.5	20.92
1303	255.6	17.27
1304	255.7	6.41
1305	255.8	0
1306	256.7	0
1307	256.8	2.04
1308	256.9	3.05
1309	257	4.04
1310	257.1	5.62
1311	257.2	6.83
1312	257.3	6.86
1313	257.4	5.14
1314	257.5	1.21
1315	257.6	0
1316	258.2	0
1317	258.3	18.72
1318	258.4	92.53
1319	258.5	211.62
1320	258.6	353.62
1321	258.7	477.22
1322	258.8	553.16
1323	258.9	600.53
1324	259	623.11
1325	259.1	613.32
1326	259.2	534.73
1327	259.3	378.32
1328	259.4	199.71
1329	259.5	84.55
1330	259.6	28.87
1331	259.7	8.53
1332	259.8	17.29
1333	259.9	39.36
1334	260	63.37
1335	260.1	77.07
1336	260.2	74.46
1337	260.3	61.46
1338	260.4	43.39
1339	260.5	26.25
1340	260.6	16.08
1341	260.7	12.37
1342	260.8	7.52
1343	260.9	0.9
1344	261	0
1345	261.4	0
1346	261.5	2.05
1347	261.6	8.01
1348	261.7	8.55
1349	261.8	7.34
1350	261.9	5.81
1351	262	3.73
1352	262.1	3.05
1353	262.2	9.73
1354	262.3	23.93
1355	262.4	35.05
1356	262.5	32.84
1357	262.6	18.94
1358	262.7	2.75
1359	262.8	0
1360	263.2	0
1361	263.3	0.88
1362	263.4	2.37
1363	263.5	0.09
1364	263.6	0.72
1365	263.7	4.51
1366	263.8	9.43
1367	263.9	11.57
1368	264	9.25
1369	264.1	2.58
1370	264.2	0
1371	264.5	0
1372	264.6	2.43
1373	264.7	23.01
1374	264.8	44.55
1375	264.9	52.95
1376	265	42.32
1377	265.1	22.02
1378	265.2	7.69
1379	265.3	0
1380	267.5	0
1381	267.6	6.2
1382	267.7	54.55
1383	267.8	93.06
1384	267.9	99.39
1385	268	68.1
1386	268.1	21.29
1387	268.2	0
1388	268.5	0
1389	268.6	8.83
1390	268.7	19.54
1391	268.8	19.24
1392	268.9	3.34
1393	269	0
1394	269.5	0
1395	269.6	8.89
1396	269.7	16.67
1397	269.8	21.71
1398	269.9	21.13
1399	270	14.91
1400	270.1	6.64
1401	270.2	1
1402	270.3	0
1403	270.6	0
1404	270.7	0.39
1405	270.8	1.21
1406	270.9	0.57
1407	271	0
1408	271.7	0
1409	271.8	1.93
1410	271.9	6.35
1411	272	11.88
1412	272.1	15.88
1413	272.2	16.17
1414	272.3	14.42
1415	272.4	13.63
1416	272.5	12.69
1417	272.6	4.65
1418	272.7	0
1419	272.9	0
1420	273	6.82
1421	273.1	11.04
1422	273.2	7.15
1423	273.3	4.44
1424	273.4	4.02
1425	273.5	7.86
1426	273.6	14.33
1427	273.7	16.99
1428	273.8	11.2
1429	273.9	0.29
1430	274	0
1431	274.6	0
1432	274.7	1.99
1433	274.8	9.39
1434	274.9	21.9
1435	275	30.12
1436	275.1	25.48
1437	275.2	12.15
1438	275.3	2.12
1439	275.4	1.2
1440	275.5	3.82
1441	275.6	4.77
1442	275.7	2.68
1443	275.8	0.21
1444	275.9	0
1445	276.4	0
1446	276.5	8.13
1447	276.6	7.48
1448	276.7	0
1449	277.9	0
1450	278	5.56
1451	278.1	5.94
1452	278.2	0
1453	279.2	0
1454	279.3	40
1455	279.4	107.33
1456	279.5	44.69
1457	279.6	0
1458	280.9	0
1459	281	3.06
1460	281.1	11.89
1461	281.2	0
1462	283.2	0
1463	283.3	4.68
1464	283.4	10.01
1465	283.5	2.36
1466	283.6	0
1467	283.9	0
1468	284	5.61
1469	284.1	21.83
1470	284.2	26.12
1471	284.3	19.75
1472	284.4	11.69
1473	284.5	6.21
1474	284.6	0
1475	285.4	0
1476	285.5	1.77
1477	285.6	3.67
1478	285.7	1.99
1479	285.8	0
1480	286.2	0
1481	286.3	6.11
1482	286.4	6.97
1483	286.5	1.27
1484	286.6	0
1485	286.8	0
1486	286.9	3.16
1487	287	0
1488	287.4	0
1489	287.5	0.48
1490	287.6	0
1491	288.3	0
1492	288.4	4.3
1493	288.5	10.92
1494	288.6	14.48
1495	288.7	11.32
1496	288.8	3.75
1497	288.9	0
1498	290.5	0
1499	290.6	4.04
1500	290.7	11.03
1501	290.8	15.26
1502	290.9	13.19
1503	291	7.11
1504	291.1	2.42
1505	291.2	1.29
1506	291.3	1.76
1507	291.4	2.32
1508	291.5	4.78
1509	291.6	11.33
1510	291.7	19.95
1511	291.8	24.67
1512	291.9	21.36
1513	292	12.28
1514	292.1	3.39
1515	292.2	0
1516	292.6	0
1517	292.7	6.49
1518	292.8	14.35
1519	292.9	16.95
1520	293	12.89
1521	293.1	4.85
1522	293.2	0
1523	293.6	0
1524	293.7	1.02
1525	293.8	0.81
1526	293.9	2.3
1527	294	7.43
1528	294.1	11.75
1529	294.2	10.36
1530	294.3	0
1531	295.2	0
1532	295.3	2.17
1533	295.4	9.37
1534	295.5	10.76
1535	295.6	16.56
1536	295.7	5.48
1537	295.8	0
1538	296.4	0
1539	296.5	39.24
1540	296.6	101.2
1541	296.7	108.1
1542	296.8	35.64
1543	296.9	0
1544	297.1	0
1545	297.2	3.48
1546	297.3	8.72
1547	297.4	0
1548	297.9	0
1549	298	68.31
1550	298.1	81.77
1551	298.2	43.6
1552	298.3	0
1553	298.6	0
1554	298.7	6.24
1555	298.8	23.27
1556	298.9	28.08
1557	299	19.59
1558	299.1	4.51
1559	299.2	0
1560	300.4	0
1561	300.5	8.08
1562	300.6	25.36
1563	300.7	45.45
1564	300.8	52.69
1565	300.9	41.7
1566	301	29.14
1567	301.1	26.6
1568	301.2	17.09
1569	301.3	0
1570	301.8	0
1571	301.9	1.76
1572	302	0
1573	302.6	0
1574	302.7	2.54
1575	302.8	7.25
1576	302.9	7.82
1577	303	2.23
1578	303.1	0
1579	303.7	0
1580	303.8	11.41
1581	303.9	40.24
1582	304	49.37
1583	304.1	34.12
1584	304.2	10.91
1585	304.3	0
1586	304.4	0
1587	304.5	8.33
1588	304.6	23.38
1589	304.7	31.53
1590	304.8	26.29
1591	304.9	13.61
1592	305	5.13
1593	305.1	4.26
1594	305.2	3.74
1595	305.3	1.23
1596	305.4	0
1597	306.4	0
1598	306.5	0.44
1599	306.6	0
1600	307.4	0
1601	307.5	0.41
1602	307.6	0.43
1603	307.7	0
1604	307.8	0
1605	307.9	0.23
1606	308	1.41
1607	308.1	2.29
1608	308.2	2.4
1609	308.3	2.27
1610	308.4	2.15
1611	308.5	0.97
1612	308.6	0
1613	310.4	0
1614	310.5	1.11
1615	310.6	6.77
1616	310.7	16.06
1617	310.8	30.3
1618	310.9	42.12
1619	311	42.78
1620	311.1	32.27
1621	311.2	18.26
1622	311.3	7.28
1623	311.4	3.33
1624	311.5	0
1625	311.6	0.13
1626	311.7	5.38
1627	311.8	10.78
1628	311.9	12.54
1629	312	10.03
1630	312.1	5.87
1631	312.2	2.66
1632	312.3	0.77
1633	312.4	0
1634	313.7	0
1635	313.8	18.45
1636	313.9	38.41
1637	314	37.46
1638	314.1	14.58
1639	314.2	0
1640	314.7	0
1641	314.8	3.63
1642	314.9	24.59
1643	315	48.04
1644	315.1	55.05
1645	315.2	38.98
1646	315.3	14.06
1647	315.4	0
1648	316.6	0
1649	316.7	3.91
1650	316.8	14.58
1651	316.9	22.56
1652	317	21.99
1653	317.1	15.63
1654	317.2	10.54
1655	317.3	9.05
1656	317.4	7.05
1657	317.5	6.26
1658	317.6	10.35
1659	317.7	15.06
1660	317.8	13.34
1661	317.9	6.37
1662	318	3.06
1663	318.1	7.04
1664	318.2	11.71
1665	318.3	10.09
1666	318.4	3.65
1667	318.5	0
1668	318.7	0
1669	318.8	1.6
1670	318.9	1.8
1671	319	0
1672	319.5	0
1673	319.6	0.08
1674	319.7	0
1675	320.2	0
1676	320.3	0.38
1677	320.4	0
1678	321.4	0
1679	321.5	2.08
1680	321.6	19.39
1681	321.7	49.97
1682	321.8	75.83
1683	321.9	65.91
1684	322	3.12
1685	322.1	0
1686	322.5	0
1687	322.6	89.81
1688	322.7	193.85
1689	322.8	197.68
1690	322.9	102.5
1691	323	0
1692	323.3	0
1693	323.4	7.02
1694	323.5	7.28
1695	323.6	1.65
1696	323.7	0
1697	324.5	0
1698	324.6	4.43
1699	324.7	8.94
1700	324.8	5.23
1701	324.9	3.3
1702	325	15.29
1703	325.1	23.44
1704	325.2	12.39
1705	325.3	0
1706	325.6	0
1707	325.7	1.2
1708	325.8	0.61
1709	325.9	0
1710	326.1	0
1711	326.2	3.25
1712	326.3	52.27
1713	326.4	125.64
1714	326.5	171.47
1715	326.6	109.64
1716	326.7	0
1717	327.7	0
1718	327.8	0.26
1719	327.9	0
1720	329.5	0
1721	329.6	8.3
1722	329.7	4.21
1723	329.8	0
1724	332.1	0
1725	332.2	7.02
1726	332.3	14.84
1727	332.4	15.5
1728	332.5	8.57
1729	332.6	0
1730	332.8	0
1731	332.9	4.25
1732	333	15.69
1733	333.1	18.99
1734	333.2	10.01
1735	333.3	0
1736	333.9	0
1737	334	4.72
1738	334.1	8.96
1739	334.2	6.09
1740	334.3	0.98
1741	334.4	0
1742	334.5	0
1743	334.6	0.98
1744	334.7	1.12
1745	334.8	0.93
1746	334.9	1.5
1747	335	3.14
1748	335.1	5.03
1749	335.2	5.79
1750	335.3	4.39
1751	335.4	0.54
1752	335.5	0
1753	335.9	0
1754	336	3.21
1755	336.1	7.41
1756	336.2	7.79
1757	336.3	4.83
1758	336.4	2.62
1759	336.5	2.7
1760	336.6	1.18
1761	336.7	0
1762	339.7	0
1763	339.8	0.34
1764	339.9	0
1765	340.7	0
1766	340.8	4.41
1767	340.9	10.7
1768	341	10.9
1769	341.1	5.47
1770	341.2	0
1771	341.6	0
1772	341.7	0.63
1773	341.8	1.28
1774	341.9	2.65
1775	342	3.8
1776	342.1	3.03
1777	342.2	0
1778	342.6	0
1779	342.7	2.13
1780	342.8	6.42
1781	342.9	8
1782	343	4.78
1783	343.1	0
1784	343.5	0
1785	343.6	5.51
1786	343.7	11.47
1787	343.8	10.26
1788	343.9	5.11
1789	344	4.69
1790	344.1	17.21
1791	344.2	32.29
1792	344.3	25.48
1793	344.4	0
1794	346.4	0
1795	346.5	6.56
1796	346.6	6.02
1797	346.7	1.85
1798	346.8	0
1799	347.3	0
1800	347.4	2.6
1801	347.5	3.8
1802	347.6	5.76
1803	347.7	7.93
1804	347.8	7.19
1805	347.9	2.47
1806	348	0
1807	348.7	0
1808	348.8	3.35
1809	348.9	19.07
1810	349	28.51
1811	349.1	21.63
1812	349.2	4.36
1813	349.3	0
1814	349.4	0
1815	349.5	6
1816	349.6	3.96
1817	349.7	0
1818	350.8	0
1819	350.9	9.73
1820	351	14.84
1821	351.1	10.18
1822	351.2	1.55
1823	351.3	0
1824	351.4	2.03
1825	351.5	10.9
1826	351.6	20.27
1827	351.7	22.62
1828	351.8	16.67
1829	351.9	7.26
1830	352	0.16
1831	352.1	0
1832	352.3	0
1833	352.4	2.9
1834	352.5	8.06
1835	352.6	12.62
1836	352.7	14.51
1837	352.8	13
1838	352.9	9.6
1839	353	5.84
1840	353.1	2.28
1841	353.2	0
1842	354.5	0
1843	354.6	4.11
1844	354.7	0.87
1845	354.8	0
1846	355	0
1847	355.1	10.75
1848	355.2	18.83
1849	355.3	16.82
1850	355.4	8.78
1851	355.5	1.26
1852	355.6	0
1853	355.8	0
1854	355.9	1.34
1855	356	10.93
1856	356.1	19.44
1857	356.2	17.61
1858	356.3	3.79
1859	356.4	0
1860	356.6	0
1861	356.7	5.68
1862	356.8	14.9
1863	356.9	15.12
1864	357	14.13
1865	357.1	16.97
1866	357.2	19.42
1867	357.3	14.84
1868	357.4	6.88
1869	357.5	1.99
1870	357.6	1.18
1871	357.7	0.5
1872	357.8	0
1873	358.1	0
1874	358.2	1.74
1875	358.3	6.48
1876	358.4	8.33
1877	358.5	6.48
1878	358.6	2.63
1879	358.7	0
1880	360.1	0
1881	360.2	1.04
1882	360.3	1.4
1883	360.4	1.27
1884	360.5	0
1885	361.5	0
1886	361.6	7.92
1887	361.7	10.2
1888	361.8	6.6
1889	361.9	4.16
1890	362	9.31
1891	362.1	16.22
1892	362.2	15.62
1893	362.3	7.44
1894	362.4	0
1895	362.5	0
1896	362.6	0.74
1897	362.7	0.85
1898	362.8	0
1899	363.7	0
1900	363.8	1.22
1901	363.9	7.42
1902	364	9.93
1903	364.1	7.72
1904	364.2	3.98
1905	364.3	1.86
1906	364.4	0.67
1907	364.5	0
1908	364.8	0
1909	364.9	4.81
1910	365	13.86
1911	365.1	17.46
1912	365.2	13.3
1913	365.3	6.14
1914	365.4	2
1915	365.5	1.17
1916	365.6	0.9
1917	365.7	0
1918	366.4	0
1919	366.5	6.99
1920	366.6	13.61
1921	366.7	13.77
1922	366.8	7.78
1923	366.9	2.07
1924	367	1.5
1925	367.1	4.63
1926	367.2	8.82
1927	367.3	13.73
1928	367.4	18.91
1929	367.5	20.45
1930	367.6	15.16
1931	367.7	5.65
1932	367.8	0
1933	368	0
1934	368.1	1.96
1935	368.2	16.66
1936	368.3	27
1937	368.4	24.25
1938	368.5	12.05
1939	368.6	1.79
1940	368.7	0
1941	369.5	0
1942	369.6	3.53
1943	369.7	14.33
1944	369.8	20.11
1945	369.9	12.69
1946	370	4.06
1947	370.1	12.1
1948	370.2	73.76
1949	370.3	207.43
1950	370.4	367.39
1951	370.5	642.44
1952	370.6	1695.87
1953	370.7	3814.12
1954	370.8	6544.74
1955	370.9	9073.49
1956	371	11062.5
1957	371.1	12668.5
1958	371.2	13819.9
1959	371.3	13858.8
1960	371.4	12062
1961	371.5	8547.49
1962	371.6	4610.17
1963	371.7	1906.34
1964	371.8	1168.24
1965	371.9	1746.17
1966	372	2676.53
1967	372.1	3344.83
1968	372.2	3610.87
1969	372.3	3478.4
1970	372.4	2940.74
1971	372.5	2067.85
1972	372.6	1092.93
1973	372.7	356.97
1974	372.8	42.68
1975	372.9	17.04
1976	373	149.2
1977	373.1	365.79
1978	373.2	615.13
1979	373.3	758.53
1980	373.4	680.99
1981	373.5	424.96
1982	373.6	166.78
1983	373.7	37.68
1984	373.8	11.93
1985	373.9	39.31
1986	374	79.36
1987	374.1	112.54
1988	374.2	124.61
1989	374.3	110.99
1990	374.4	86.86
1991	374.5	63.91
1992	374.6	9.26
1993	374.7	0
1994	375.2	0
1995	375.3	10.99
1996	375.4	64.5
1997	375.5	59.17
[truncated: 1,445 more rows]
