# Supplementary material for: Electron transfer engineering of artificially designed cell factory for complete biosynthesis of natural products
Source: Research Square preprint supplement (doi:10.21203/rs.3.rs-4718218/v1), 2024-08-01

LCMS方法报告

**仪器型号：安捷伦1290II-6460**

色谱柱：Agilent EP- C18, 2.1×50mm, 1.8m 柱温： 30 ℃

流动相：A 0.1%甲酸水 B乙腈 流 速：0.2mL/min

梯度洗脱，0-2-15-20-20.1 min，B%：5-5-95-95-5，后运行5min。

**质谱采集参数：**

离子源类型：ESI 模式：MS2 Scan 极性：Positive m/z范围：50-600

离子源温度：350℃ 雾化气流速、压力：10L/min，45psi

毛细管电压：4000V Fragmentor：100V

**数据处理方式：**

积分方式：自动积分 积分器：Agile 2 质谱图提取方式：峰高10%部分的平均质谱图

**测试结果：**

见PDF格式 analysis report， Excel格式文档为数据处理软件导出的可做图数据，Blank为流动相背景数据供参考。

**Tips：LC-ESI-MS中，ESI+模式下常见加合离子情况（供参考）**


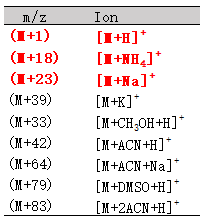

Supplement: Supplementary file 10 [file Pos_LCMS report.docx]
