# Supplementary material for: Electron transfer engineering of artificially designed cell factory for complete biosynthesis of natural products
Source: Research Square preprint supplement (doi:10.21203/rs.3.rs-4718218/v1), 2024-08-01
Supplement: Supplementary file 13 [file TICdata_4608-01.XLS.xls]

## Sheet: Sheet1
+ESI TIC Scan Frag=100.0V CF=0.000 DF=0.000 4608-01.d
Index	X	Y
0	0	2.38725e+06
1	0	2.19921e+06
2	0.01	2.22071e+06
3	0.01	2148698
4	0.02	2114039
5	0.02	2112726
6	0.03	2.13372e+06
7	0.03	2.14793e+06
8	0.04	2.19119e+06
9	0.04	2205751
10	0.05	2189510
11	0.05	2.16762e+06
12	0.06	2.16779e+06
13	0.06	2164844
14	0.06	2.16542e+06
15	0.07	2.16053e+06
16	0.07	2.16658e+06
17	0.08	2.14563e+06
18	0.08	2.16142e+06
19	0.09	2.18779e+06
20	0.09	2188302
21	0.1	2.19263e+06
22	0.1	2.21077e+06
23	0.11	2192350
24	0.11	2.18181e+06
25	0.12	2.18756e+06
26	0.12	2.19253e+06
27	0.12	2.17403e+06
28	0.13	2.16008e+06
29	0.13	2128823
30	0.14	2129873
31	0.14	2111804
32	0.15	2.12082e+06
33	0.15	2.11752e+06
34	0.16	2.12328e+06
35	0.16	2094358
36	0.17	2.09677e+06
37	0.17	2.09883e+06
38	0.18	2.10696e+06
39	0.18	2.1128e+06
40	0.19	2130438
41	0.19	2.12017e+06
42	0.19	2114622
43	0.2	2.1097e+06
44	0.2	2.12743e+06
45	0.21	2.13795e+06
46	0.21	2.16075e+06
47	0.22	2.18067e+06
48	0.22	2204470
49	0.23	2191458
50	0.23	2.18289e+06
51	0.24	2.16935e+06
52	0.24	2152520
53	0.25	2.13434e+06
54	0.25	2.14296e+06
55	0.25	2.13644e+06
56	0.26	2131670
57	0.26	2.14522e+06
58	0.27	2.14947e+06
59	0.27	2.14544e+06
60	0.28	2150102
61	0.28	2.16476e+06
62	0.29	2.14352e+06
63	0.29	2139557
64	0.3	2.13844e+06
65	0.3	2.13205e+06
66	0.31	2122895
67	0.31	2.13823e+06
68	0.31	2.13767e+06
69	0.32	2.12899e+06
70	0.32	2.13617e+06
71	0.33	2125277
72	0.33	2.12397e+06
73	0.34	2.11872e+06
74	0.34	2124528
75	0.35	2.12526e+06
76	0.35	2.12643e+06
77	0.36	2.11747e+06
78	0.36	2.1038e+06
79	0.37	2104874
80	0.37	2.10013e+06
81	0.37	2.11257e+06
82	0.38	2.1413e+06
83	0.38	2161612
84	0.39	2.1385e+06
85	0.39	2.12999e+06
86	0.4	2.1024e+06
87	0.4	2.08252e+06
88	0.41	2.09586e+06
89	0.41	2119727
90	0.42	2.14031e+06
91	0.42	2.1731e+06
92	0.43	2.17884e+06
93	0.43	2.18767e+06
94	0.44	2207825
95	0.44	2198608
96	0.44	2.20018e+06
97	0.45	2.20395e+06
98	0.45	2.18893e+06
99	0.46	2.15565e+06
100	0.46	2.16172e+06
101	0.47	2.15215e+06
102	0.47	2.14411e+06
103	0.48	2138034
104	0.48	2144768
105	0.49	2144135
106	0.49	2.16203e+06
107	0.5	2.16827e+06
108	0.5	2173982
109	0.5	2171942
110	0.51	2.16285e+06
111	0.51	2.15274e+06
112	0.52	2.1537e+06
113	0.52	2153420
114	0.53	2.14483e+06
115	0.53	2.1357e+06
116	0.54	2.12889e+06
117	0.54	2.14259e+06
118	0.55	2150752
119	0.55	2147849
120	0.56	2161054
121	0.56	2.15444e+06
122	0.56	2.16397e+06
123	0.57	2.16257e+06
124	0.57	2.18275e+06
125	0.58	2.15758e+06
126	0.58	2.17111e+06
127	0.59	2.14763e+06
128	0.59	2157472
129	0.6	2.13727e+06
130	0.6	2.13695e+06
131	0.61	2.12226e+06
132	0.61	2.11223e+06
133	0.62	2100474
134	0.62	2.11369e+06
135	0.62	2.12955e+06
136	0.63	2.13532e+06
137	0.63	2.1524e+06
138	0.64	2.15237e+06
139	0.64	2.15002e+06
140	0.65	2137697
141	0.65	2.15141e+06
142	0.66	2.13583e+06
143	0.66	2.15022e+06
144	0.67	2157457
145	0.67	2.16871e+06
146	0.68	2159716
147	0.68	2.16393e+06
148	0.69	2.14645e+06
149	0.69	2.15241e+06
150	0.69	2.15438e+06
151	0.7	2.15738e+06
152	0.7	2.15558e+06
153	0.71	2.13455e+06
154	0.71	2.09809e+06
155	0.72	2.08934e+06
156	0.72	2.09363e+06
157	0.73	2.11087e+06
158	0.73	2.13834e+06
159	0.74	2.17634e+06
160	0.74	2.19633e+06
161	0.75	2.2079e+06
162	0.75	2.19936e+06
163	0.75	2.19598e+06
164	0.76	2174705
165	0.76	2.17377e+06
166	0.77	2.17854e+06
167	0.77	2.20054e+06
168	0.78	2.20915e+06
169	0.78	2.24325e+06
170	0.79	2.25678e+06
171	0.79	2.26709e+06
172	0.8	2284898
173	0.8	2.31577e+06
174	0.81	2.3408e+06
175	0.81	2.3524e+06
176	0.81	2.38555e+06
177	0.82	2406071
178	0.82	2.40482e+06
179	0.83	2.40346e+06
180	0.83	2434083
181	0.84	2456212
182	0.84	2475437
183	0.85	2.47671e+06
184	0.85	2.48853e+06
185	0.86	2.49659e+06
186	0.86	2.48142e+06
187	0.87	2.49546e+06
188	0.87	2.51856e+06
189	0.87	2.5036e+06
190	0.88	2.47078e+06
191	0.88	2452429
192	0.89	2425291
193	0.89	2.4384e+06
194	0.9	2.48296e+06
195	0.9	2.53118e+06
196	0.91	2.56834e+06
197	0.91	2.59141e+06
198	0.92	2.61159e+06
199	0.92	2.61456e+06
200	0.93	2.65584e+06
201	0.93	2.69282e+06
202	0.93	2.7351e+06
203	0.94	2776476
204	0.94	2827361
205	0.95	2.86682e+06
206	0.95	2.9102e+06
207	0.96	2923205
208	0.96	2.9025e+06
209	0.97	2882888
210	0.97	2.85577e+06
211	0.98	2.83704e+06
212	0.98	2830737
213	0.99	2.86221e+06
214	0.99	2839414
215	1	2.79446e+06
216	1	2.77413e+06
217	1	2750616
218	1.01	2.71219e+06
219	1.01	2.73011e+06
220	1.02	2.74933e+06
221	1.02	2739716
222	1.03	2.74027e+06
223	1.03	2.6995e+06
224	1.04	2.65866e+06
225	1.04	2.65001e+06
226	1.05	2.62916e+06
227	1.05	2.63085e+06
228	1.06	2.64886e+06
229	1.06	2.63583e+06
230	1.06	2.57845e+06
231	1.07	2.54881e+06
232	1.07	2.51874e+06
233	1.08	2.4832e+06
234	1.08	2.46942e+06
235	1.09	2.43766e+06
236	1.09	2.40777e+06
237	1.1	2.37462e+06
238	1.1	2376110
239	1.11	2.3681e+06
240	1.11	2.40547e+06
241	1.12	2.43236e+06
242	1.12	2.52268e+06
243	1.12	2.61882e+06
244	1.13	2.74059e+06
245	1.13	2.86753e+06
246	1.14	3052461
247	1.14	3222832
248	1.15	3368043
249	1.15	3.5351e+06
250	1.16	3672530
251	1.16	3774323
252	1.17	3855794
253	1.17	4.01633e+06
254	1.18	4.14268e+06
255	1.18	4.27444e+06
256	1.18	4378058
257	1.19	4.4884e+06
258	1.19	4.53788e+06
259	1.2	4.59084e+06
260	1.2	4662589
261	1.21	4.76438e+06
262	1.21	4.76647e+06
263	1.22	4766096
264	1.22	4.75459e+06
265	1.23	4694640
266	1.23	4586498
267	1.24	4605324
268	1.24	4534926
269	1.25	4433805
270	1.25	4.37002e+06
271	1.25	4312251
272	1.26	4233415
273	1.26	4213900
274	1.27	4196616
275	1.27	4.17544e+06
276	1.28	4.16905e+06
277	1.28	4.10902e+06
278	1.29	4.06771e+06
279	1.29	4020395
280	1.3	3.95884e+06
281	1.3	3869414
282	1.31	3805530
283	1.31	3.71339e+06
284	1.31	3.63649e+06
285	1.32	3.56289e+06
286	1.32	3.45175e+06
287	1.33	3309079
288	1.33	3172605
289	1.34	3.04193e+06
290	1.34	2.95864e+06
291	1.35	2.90026e+06
292	1.35	2.88991e+06
293	1.36	2.84064e+06
294	1.36	2745655
295	1.37	2.67165e+06
296	1.37	2.60988e+06
297	1.37	2.51209e+06
298	1.38	2.47942e+06
299	1.38	2484721
300	1.39	2.47425e+06
301	1.39	2.49497e+06
302	1.4	2493789
303	1.4	2466048
304	1.41	2.44101e+06
305	1.41	2.41405e+06
306	1.42	2.40141e+06
307	1.42	2.39708e+06
308	1.43	2.38636e+06
309	1.43	2.38228e+06
310	1.43	2388026
311	1.44	2.378e+06
312	1.44	2.37615e+06
313	1.45	2403506
314	1.45	2.43554e+06
315	1.46	2.45917e+06
316	1.46	2459382
317	1.47	2.45748e+06
318	1.47	2.40453e+06
319	1.48	2.35797e+06
320	1.48	2.33675e+06
321	1.49	2.32909e+06
322	1.49	2315489
323	1.5	2323679
324	1.5	2.3079e+06
325	1.5	2.28541e+06
326	1.51	2.29859e+06
327	1.51	2.28656e+06
328	1.52	2.30457e+06
329	1.52	2.3129e+06
330	1.53	2345689
331	1.53	2.34218e+06
332	1.54	2343339
333	1.54	2333315
334	1.55	2.33331e+06
335	1.55	2317884
336	1.56	2327402
337	1.56	2332150
338	1.56	2.30365e+06
339	1.57	2.28514e+06
340	1.57	2.25628e+06
341	1.58	2240458
342	1.58	2.21312e+06
343	1.59	2.21364e+06
344	1.59	2.21772e+06
345	1.6	2230794
346	1.6	2.22032e+06
347	1.61	2.24488e+06
348	1.61	2.24683e+06
349	1.62	2.24263e+06
350	1.62	2251281
351	1.62	2251097
352	1.63	2.24517e+06
353	1.63	2.25726e+06
354	1.64	2.27548e+06
355	1.64	2.26403e+06
356	1.65	2270114
357	1.65	2.26849e+06
358	1.66	2.26657e+06
359	1.66	2.24284e+06
360	1.67	2.25502e+06
361	1.67	2.25557e+06
362	1.68	2249394
363	1.68	2.23747e+06
364	1.68	2.24166e+06
365	1.69	2220461
366	1.69	2.22945e+06
367	1.7	2217524
368	1.7	2.20564e+06
369	1.71	2.20719e+06
370	1.71	2.22352e+06
371	1.72	2247113
372	1.72	2.27037e+06
373	1.73	2.30305e+06
374	1.73	2294873
375	1.74	2.27573e+06
376	1.74	2.23985e+06
377	1.75	2.23378e+06
378	1.75	2215547
379	1.75	2.22088e+06
380	1.76	2.19374e+06
381	1.76	2162865
382	1.77	2137034
383	1.77	2.11704e+06
384	1.78	2131145
385	1.78	2.17461e+06
386	1.79	2.22208e+06
387	1.79	2.24622e+06
388	1.8	2.27281e+06
389	1.8	2.27126e+06
390	1.81	2.26572e+06
391	1.81	2265624
392	1.81	2.25939e+06
393	1.82	2.23637e+06
394	1.82	2216355
395	1.83	2207146
396	1.83	2.20492e+06
397	1.84	2.22121e+06
398	1.84	2.22744e+06
399	1.85	2.21955e+06
400	1.85	2.21073e+06
401	1.86	2.19364e+06
402	1.86	2208840
403	1.87	2.23602e+06
404	1.87	2.25485e+06
405	1.87	2.25379e+06
406	1.88	2.25178e+06
407	1.88	2.23276e+06
408	1.89	2.23623e+06
409	1.89	2.25841e+06
410	1.9	2261976
411	1.9	2.27091e+06
412	1.91	2.28046e+06
413	1.91	2267523
414	1.92	2.24806e+06
415	1.92	2.24e+06
416	1.93	2.22288e+06
417	1.93	2.19641e+06
418	1.93	2.20663e+06
419	1.94	2.22256e+06
420	1.94	2.2417e+06
421	1.95	2252009
422	1.95	2.2553e+06
423	1.96	2.23388e+06
424	1.96	2.21687e+06
425	1.97	2219377
426	1.97	2.20015e+06
427	1.98	2.19778e+06
428	1.98	2.19875e+06
429	1.99	2201852
430	1.99	2.18228e+06
431	1.99	2.19692e+06
432	2	2.22675e+06
433	2	2.23726e+06
434	2.01	2243187
435	2.01	2.26528e+06
436	2.02	2.27153e+06
437	2.02	2228257
438	2.03	2.22493e+06
439	2.03	2243248
440	2.04	2.24727e+06
441	2.04	2.2537e+06
442	2.05	2294386
443	2.05	2.29266e+06
444	2.06	2273681
445	2.06	2255170
446	2.06	2.25879e+06
447	2.07	2234579
448	2.07	2.20535e+06
449	2.08	2.18973e+06
450	2.08	2.18152e+06
451	2.09	2169133
452	2.09	2.16936e+06
453	2.1	2.18029e+06
454	2.1	2.19242e+06
455	2.11	2.1983e+06
456	2.11	2.19696e+06
457	2.12	2206229
458	2.12	2.21109e+06
459	2.12	2.17782e+06
460	2.13	2.15822e+06
461	2.13	2157674
462	2.14	2152429
463	2.14	2.17964e+06
464	2.15	2.20808e+06
465	2.15	2.21775e+06
466	2.16	2.19583e+06
467	2.16	2186680
468	2.17	2.16276e+06
469	2.17	2174320
470	2.18	2.17634e+06
471	2.18	2.17295e+06
472	2.18	2.18125e+06
473	2.19	2167518
474	2.19	2.1587e+06
475	2.2	2.16862e+06
476	2.2	2.18702e+06
477	2.21	2167723
478	2.21	2182190
479	2.22	2177410
480	2.22	2.19671e+06
481	2.23	2.19554e+06
482	2.23	2.20883e+06
483	2.24	2.2104e+06
484	2.24	2.18659e+06
485	2.24	2.16022e+06
486	2.25	2.14753e+06
487	2.25	2.14452e+06
488	2.26	2.14106e+06
489	2.26	2.18562e+06
490	2.27	2.21148e+06
491	2.27	2234132
492	2.28	2221836
493	2.28	2.21532e+06
494	2.29	2.20214e+06
495	2.29	2.19781e+06
496	2.3	2217431
497	2.3	2231161
498	2.31	2.22157e+06
499	2.31	2.22074e+06
500	2.31	2.20534e+06
501	2.32	2.19274e+06
502	2.32	2.20422e+06
503	2.33	2.21749e+06
504	2.33	2201034
505	2.34	2.20065e+06
506	2.34	2.18747e+06
507	2.35	2175221
508	2.35	2.1621e+06
509	2.36	2190754
510	2.36	2195333
511	2.37	2.20852e+06
512	2.37	2212113
513	2.37	2.23015e+06
514	2.38	2211134
515	2.38	2.21953e+06
516	2.39	2.22134e+06
517	2.39	2.22933e+06
518	2.4	2.22231e+06
519	2.4	2.22073e+06
520	2.41	2216259
521	2.41	2.1826e+06
522	2.42	2.16876e+06
523	2.42	2.16519e+06
524	2.43	2.168e+06
525	2.43	2.17049e+06
526	2.43	2.20701e+06
527	2.44	2.20673e+06
528	2.44	2.20341e+06
529	2.45	2216821
530	2.45	2211364
531	2.46	2.18845e+06
532	2.46	2184942
533	2.47	2162490
534	2.47	2.16153e+06
535	2.48	2.15884e+06
536	2.48	2.15884e+06
537	2.49	2152787
538	2.49	2.15437e+06
539	2.49	2140992
540	2.5	2171123
541	2.5	2194117
542	2.51	2.2081e+06
543	2.51	2.21689e+06
544	2.52	2208829
545	2.52	2180426
546	2.53	2190504
547	2.53	2.1924e+06
548	2.54	2201917
549	2.54	2.21523e+06
550	2.55	2.23813e+06
551	2.55	2.22907e+06
552	2.56	2240556
553	2.56	2.2385e+06
554	2.56	2219594
555	2.57	2.22035e+06
556	2.57	2.22045e+06
557	2.58	2233716
558	2.58	2.26298e+06
559	2.59	2.32058e+06
560	2.59	2.35932e+06
561	2.6	2.40514e+06
562	2.6	2.4457e+06
563	2.61	2.4634e+06
564	2.61	2.47662e+06
565	2.62	2.46934e+06
566	2.62	2.48004e+06
567	2.62	2.49261e+06
568	2.63	2.51978e+06
569	2.63	2527751
570	2.64	2.56718e+06
571	2.64	2.58618e+06
572	2.65	2.607e+06
573	2.65	2.62144e+06
574	2.66	2664383
575	2.66	2.70459e+06
576	2.67	2.73289e+06
577	2.67	2.74025e+06
578	2.68	2.77139e+06
579	2.68	2784343
580	2.68	2.78991e+06
581	2.69	2.8112e+06
582	2.69	2.83601e+06
583	2.7	2.85039e+06
584	2.7	2843686
585	2.71	2.85782e+06
586	2.71	2.87062e+06
587	2.72	2.89036e+06
588	2.72	2879310
589	2.73	2.89706e+06
590	2.73	2.90993e+06
591	2.74	2.92837e+06
592	2.74	2.92751e+06
593	2.74	2.92461e+06
594	2.75	2902894
595	2.75	2.87875e+06
596	2.76	2.86763e+06
597	2.76	2.87166e+06
598	2.77	2939531
599	2.77	2.98578e+06
600	2.78	2977979
601	2.78	2.95192e+06
602	2.79	2.93121e+06
603	2.79	2890913
604	2.8	2.86092e+06
605	2.8	2.8862e+06
606	2.8	2.93087e+06
607	2.81	2.93918e+06
608	2.81	2.93875e+06
609	2.82	2.95607e+06
610	2.82	2.9226e+06
611	2.83	2.88321e+06
612	2.83	2857296
613	2.84	2.85161e+06
614	2.84	2.84408e+06
615	2.85	2.86837e+06
616	2.85	2.88837e+06
617	2.86	2.8965e+06
618	2.86	2875339
619	2.87	2.88596e+06
620	2.87	2.88735e+06
621	2.87	2878449
622	2.88	2921238
623	2.88	2942535
624	2.89	2930712
625	2.89	2.91778e+06
626	2.9	2901273
627	2.9	2.87736e+06
628	2.91	2849803
629	2.91	2.84331e+06
630	2.92	2.82745e+06
631	2.92	2.81182e+06
632	2.93	2.78825e+06
633	2.93	2.82478e+06
634	2.93	2829058
635	2.94	2.8327e+06
636	2.94	2.83647e+06
637	2.95	2.83093e+06
638	2.95	2815306
639	2.96	2.82682e+06
640	2.96	2.82562e+06
641	2.97	2.83462e+06
642	2.97	2.82846e+06
643	2.98	2.80799e+06
644	2.98	2.80927e+06
645	2.99	2.82128e+06
646	2.99	2.81924e+06
647	2.99	2.84122e+06
648	3	2.84401e+06
649	3	2.83102e+06
650	3.01	2817791
651	3.01	2.8004e+06
652	3.02	2.78637e+06
653	3.02	2.79217e+06
654	3.03	2.80789e+06
655	3.03	2.82722e+06
656	3.04	2.83339e+06
657	3.04	2838045
658	3.05	2840066
659	3.05	2.83267e+06
660	3.05	2.8294e+06
661	3.06	2.85737e+06
662	3.06	2.87101e+06
663	3.07	2844185
664	3.07	2.83644e+06
665	3.08	2.82178e+06
666	3.08	2.78684e+06
667	3.09	2.77376e+06
668	3.09	2.78287e+06
669	3.1	2.75049e+06
670	3.1	2727781
671	3.11	2719089
672	3.11	2.69452e+06
673	3.12	2.71108e+06
674	3.12	2732491
675	3.12	2.75547e+06
676	3.13	2.78563e+06
677	3.13	2.81876e+06
678	3.14	2818541
679	3.14	2.82031e+06
680	3.15	2822650
681	3.15	2831843
682	3.16	2.82322e+06
683	3.16	2.80837e+06
684	3.17	2.80917e+06
685	3.17	2.76821e+06
686	3.18	2.76184e+06
687	3.18	2.77677e+06
688	3.18	2.81454e+06
689	3.19	2.80876e+06
690	3.19	2.82496e+06
691	3.2	2.81556e+06
692	3.2	2.77013e+06
693	3.21	2.75784e+06
694	3.21	2.7519e+06
695	3.22	2.72624e+06
696	3.22	2.71478e+06
697	3.23	2.76402e+06
698	3.23	2.73381e+06
699	3.24	2.71701e+06
700	3.24	2.74449e+06
701	3.24	2.73419e+06
702	3.25	2735268
703	3.25	2.78434e+06
704	3.26	2.7904e+06
705	3.26	2771677
706	3.27	2.77042e+06
707	3.27	2775751
708	3.28	2761565
709	3.28	2.7918e+06
710	3.29	2789282
711	3.29	2780744
712	3.3	2.76118e+06
713	3.3	2.78026e+06
714	3.3	2.77933e+06
715	3.31	2.74974e+06
716	3.31	2.73923e+06
717	3.32	2.74498e+06
718	3.32	2.70367e+06
719	3.33	2.70145e+06
720	3.33	2726407
721	3.34	2.71785e+06
722	3.34	2.71619e+06
723	3.35	2.71019e+06
724	3.35	2710822
725	3.36	2.71864e+06
726	3.36	2711951
727	3.37	2685743
728	3.37	2.69251e+06
729	3.37	2.69821e+06
730	3.38	2.68299e+06
731	3.38	2.71113e+06
732	3.39	2742240
733	3.39	2.7596e+06
734	3.4	2.72813e+06
735	3.4	2.7386e+06
736	3.41	2.72429e+06
737	3.41	2.70098e+06
738	3.42	2.68206e+06
739	3.42	2.68646e+06
740	3.43	2.6757e+06
741	3.43	2669604
742	3.43	2.69598e+06
743	3.44	2.7075e+06
744	3.44	2.69701e+06
745	3.45	2.71091e+06
746	3.45	2704238
747	3.46	2.69141e+06
748	3.46	2.67739e+06
749	3.47	2.68206e+06
750	3.47	2.68641e+06
751	3.48	2.68643e+06
752	3.48	2.68629e+06
753	3.49	2.71406e+06
754	3.49	2.70828e+06
755	3.49	2.69107e+06
756	3.5	2.71278e+06
757	3.5	2.73549e+06
758	3.51	2.71832e+06
759	3.51	2.68811e+06
760	3.52	2649340
761	3.52	2620657
762	3.53	2.59407e+06
763	3.53	2.59301e+06
764	3.54	2.63352e+06
765	3.54	2.67936e+06
766	3.55	2.69267e+06
767	3.55	2701518
768	3.55	2.72424e+06
769	3.56	2.70204e+06
770	3.56	2.68298e+06
771	3.57	2.66978e+06
772	3.57	2.70041e+06
773	3.58	2.68599e+06
774	3.58	2.69733e+06
775	3.59	2.69023e+06
776	3.59	2686276
777	3.6	2.64758e+06
778	3.6	2660721
779	3.61	2.65042e+06
780	3.61	2.63047e+06
781	3.62	2.62927e+06
782	3.62	2.6357e+06
783	3.62	2.64339e+06
784	3.63	2665224
785	3.63	2.69192e+06
786	3.64	2729858
787	3.64	2.75315e+06
788	3.65	2.72975e+06
789	3.65	2.71491e+06
790	3.66	2.69338e+06
791	3.66	2648658
792	3.67	2.62438e+06
793	3.67	2.65613e+06
794	3.68	2662621
795	3.68	2.65858e+06
796	3.68	2.66666e+06
797	3.69	2.65916e+06
798	3.69	2.65111e+06
799	3.7	2.65003e+06
800	3.7	2.66943e+06
801	3.71	2.67154e+06
802	3.71	2.6812e+06
803	3.72	2.68855e+06
804	3.72	2.6797e+06
805	3.73	2.65426e+06
806	3.73	2.64533e+06
807	3.74	2.63551e+06
808	3.74	2.57887e+06
809	3.74	2.57207e+06
810	3.75	2.55737e+06
811	3.75	2512795
812	3.76	2.49339e+06
813	3.76	2.50217e+06
814	3.77	2.49764e+06
815	3.77	2.52427e+06
816	3.78	2.57485e+06
817	3.78	2.60961e+06
818	3.79	2.64066e+06
819	3.79	2.62924e+06
820	3.8	2.61303e+06
821	3.8	2.61023e+06
822	3.8	2599264
823	3.81	2.59521e+06
824	3.81	2.58488e+06
825	3.82	2.56536e+06
826	3.82	2.55648e+06
827	3.83	2.55317e+06
828	3.83	2.54599e+06
829	3.84	2.57668e+06
830	3.84	2.61057e+06
831	3.85	2.63067e+06
832	3.85	2618230
833	3.86	2607447
834	3.86	2.60927e+06
835	3.86	2583669
836	3.87	2.53992e+06
837	3.87	2525449
838	3.88	2.51949e+06
839	3.88	2.48004e+06
840	3.89	2.50667e+06
841	3.89	2.53597e+06
842	3.9	2.57712e+06
843	3.9	2.56271e+06
844	3.91	2.57672e+06
845	3.91	2.55073e+06
846	3.92	2.54923e+06
847	3.92	2.55913e+06
848	3.93	2.57683e+06
849	3.93	2.55921e+06
850	3.93	2.55981e+06
851	3.94	2.54445e+06
852	3.94	2.52793e+06
853	3.95	2.53594e+06
854	3.95	2564704
855	3.96	2.56585e+06
856	3.96	2.57398e+06
857	3.97	2.55864e+06
858	3.97	2.55652e+06
859	3.98	2.54635e+06
860	3.98	2.55528e+06
861	3.99	2.53366e+06
862	3.99	2.50672e+06
863	3.99	2.491e+06
864	4	2.4876e+06
865	4	2.47559e+06
866	4.01	2503506
867	4.01	2.54712e+06
868	4.02	2.54981e+06
869	4.02	2.55869e+06
870	4.03	2.58623e+06
871	4.03	2.57488e+06
872	4.04	2.53973e+06
873	4.04	2.50851e+06
874	4.05	2.48777e+06
875	4.05	2474593
876	4.05	2.47934e+06
877	4.06	2.51713e+06
878	4.06	2.54073e+06
879	4.07	2.53161e+06
880	4.07	2.52295e+06
881	4.08	2.50747e+06
882	4.08	2.4712e+06
883	4.09	2.47255e+06
884	4.09	2.48718e+06
885	4.1	2475388
886	4.1	2493346
887	4.11	2501898
888	4.11	2.49733e+06
889	4.11	2.50108e+06
890	4.12	2.50615e+06
891	4.12	2.48365e+06
892	4.13	2.48262e+06
893	4.13	2468477
894	4.14	2.45759e+06
895	4.14	2.47306e+06
896	4.15	2482121
897	4.15	2.48986e+06
898	4.16	2.49626e+06
899	4.16	2485459
900	4.17	2.46991e+06
901	4.17	2.45815e+06
902	4.18	2.45269e+06
903	4.18	2.45475e+06
904	4.18	2457690
905	4.19	2465953
906	4.19	2.46106e+06
907	4.2	2.43613e+06
908	4.2	2.44082e+06
909	4.21	2.43244e+06
910	4.21	2.40639e+06
911	4.22	2.41012e+06
912	4.22	2.42531e+06
913	4.23	2.4235e+06
914	4.23	2429941
915	4.24	2.44281e+06
916	4.24	2.45163e+06
917	4.24	2.44829e+06
918	4.25	2.44876e+06
919	4.25	2.46469e+06
920	4.26	2.46614e+06
921	4.26	2.47621e+06
922	4.27	2.49416e+06
923	4.27	2.50276e+06
924	4.28	2.486e+06
925	4.28	2477569
926	4.29	2.45338e+06
927	4.29	2.42803e+06
928	4.3	2.40031e+06
929	4.3	2425869
930	4.3	2.43718e+06
931	4.31	2.43751e+06
932	4.31	2.45137e+06
933	4.32	2.46272e+06
934	4.32	2.44407e+06
935	4.33	2.45678e+06
936	4.33	2.45047e+06
937	4.34	2.43235e+06
938	4.34	2.42631e+06
939	4.35	2397212
940	4.35	2.38494e+06
941	4.36	2403754
942	4.36	2.41043e+06
943	4.36	2.4122e+06
944	4.37	2.4369e+06
945	4.37	2.43357e+06
946	4.38	2.41276e+06
947	4.38	2404296
948	4.39	2.40583e+06
949	4.39	2.40061e+06
950	4.4	2.41849e+06
951	4.4	2.41875e+06
952	4.41	2424029
953	4.41	2426625
954	4.42	2.39486e+06
955	4.42	2.39411e+06
956	4.43	2.43294e+06
957	4.43	2.42228e+06
958	4.43	2.3969e+06
959	4.44	2.40393e+06
960	4.44	2384531
961	4.45	2348863
962	4.45	2.34685e+06
963	4.46	2.33848e+06
964	4.46	2.33181e+06
965	4.47	2335909
966	4.47	2346393
967	4.48	2.34687e+06
968	4.48	2342465
969	4.49	2.33207e+06
970	4.49	2.30555e+06
971	4.49	2.31956e+06
972	4.5	2.35184e+06
973	4.5	2371009
974	4.51	2.35721e+06
975	4.51	2.35871e+06
976	4.52	2.32394e+06
977	4.52	2.29626e+06
978	4.53	2.29698e+06
979	4.53	2.31928e+06
980	4.54	2.30934e+06
981	4.54	2.32677e+06
982	4.55	2.31666e+06
983	4.55	2304384
984	4.55	2.28199e+06
985	4.56	2297036
986	4.56	2.28976e+06
987	4.57	2285685
988	4.57	2.27372e+06
989	4.58	2.26101e+06
990	4.58	2248750
991	4.59	2.25659e+06
992	4.59	2.29175e+06
993	4.6	2.33729e+06
994	4.6	2.38042e+06
995	4.61	2.3831e+06
996	4.61	2378537
997	4.61	2353395
998	4.62	2315366
999	4.62	2.3019e+06
1000	4.63	2290661
1001	4.63	2.29832e+06
1002	4.64	2308695
1003	4.64	2.32591e+06
1004	4.65	2.3269e+06
1005	4.65	2.32385e+06
1006	4.66	2.31603e+06
1007	4.66	2.31594e+06
1008	4.67	2.29851e+06
1009	4.67	2.30181e+06
1010	4.67	2299505
1011	4.68	2.28346e+06
1012	4.68	2271285
1013	4.69	2.25822e+06
1014	4.69	2250306
1015	4.7	2.24886e+06
1016	4.7	2.25029e+06
1017	4.71	2.24359e+06
1018	4.71	2.26167e+06
1019	4.72	2.25765e+06
1020	4.72	2.27143e+06
1021	4.73	2.29086e+06
1022	4.73	2.29763e+06
1023	4.74	2.2961e+06
1024	4.74	2.30333e+06
1025	4.74	2302640
1026	4.75	2.26365e+06
1027	4.75	2.2487e+06
1028	4.76	2.24067e+06
1029	4.76	2.2284e+06
1030	4.77	2.2454e+06
1031	4.77	2.26859e+06
1032	4.78	2.26715e+06
1033	4.78	2.25036e+06
1034	4.79	2.2319e+06
1035	4.79	2190398
1036	4.8	2.19003e+06
1037	4.8	2.18555e+06
1038	4.8	2213779
1039	4.81	2248393
1040	4.81	2264257
1041	4.82	2.26034e+06
1042	4.82	2.2786e+06
1043	4.83	2.27316e+06
1044	4.83	2.26619e+06
1045	4.84	2.25912e+06
1046	4.84	2252093
1047	4.85	2.2501e+06
1048	4.85	2.25588e+06
1049	4.86	2281933
1050	4.86	2.33356e+06
1051	4.86	2.33332e+06
1052	4.87	2.30223e+06
1053	4.87	2.29965e+06
1054	4.88	2.28699e+06
1055	4.88	2.26648e+06
1056	4.89	2.28545e+06
1057	4.89	2.29029e+06
1058	4.9	2.26772e+06
1059	4.9	2.26017e+06
1060	4.91	2263722
1061	4.91	2.27828e+06
1062	4.92	2.28274e+06
1063	4.92	2.29168e+06
1064	4.92	2.29857e+06
1065	4.93	2280090
1066	4.93	2.23685e+06
1067	4.94	2.22503e+06
1068	4.94	2.20602e+06
1069	4.95	2.21319e+06
1070	4.95	2231495
1071	4.96	2.26382e+06
1072	4.96	2276235
1073	4.97	2.26283e+06
1074	4.97	2.26422e+06
1075	4.98	2.26691e+06
1076	4.98	2.25154e+06
1077	4.99	2251666
1078	4.99	2.27315e+06
1079	4.99	2.24489e+06
1080	5	2.22613e+06
1081	5	2.2304e+06
1082	5.01	2215551
1083	5.01	2.20148e+06
1084	5.02	2.2052e+06
1085	5.02	2.21203e+06
1086	5.03	2.22336e+06
1087	5.03	2.2196e+06
1088	5.04	2216009
1089	5.04	2.22153e+06
1090	5.05	2.23063e+06
1091	5.05	2.22551e+06
1092	5.05	2240922
1093	5.06	2.25939e+06
1094	5.06	2.27206e+06
1095	5.07	2.28812e+06
1096	5.07	2.28739e+06
1097	5.08	2.29473e+06
1098	5.08	2.29448e+06
1099	5.09	2.28969e+06
1100	5.09	2.27778e+06
1101	5.1	2279574
1102	5.1	2.27308e+06
1103	5.11	2249741
1104	5.11	2.22541e+06
1105	5.11	2.21161e+06
1106	5.12	2211883
1107	5.12	2.20513e+06
1108	5.13	2.20573e+06
1109	5.13	2.22093e+06
1110	5.14	2.20023e+06
1111	5.14	2.18595e+06
1112	5.15	2.19043e+06
1113	5.15	2.18816e+06
1114	5.16	2.18378e+06
1115	5.16	2.21615e+06
1116	5.17	2.21796e+06
1117	5.17	2.21762e+06
1118	5.17	2.22091e+06
1119	5.18	2.23084e+06
1120	5.18	2.22315e+06
1121	5.19	2.22455e+06
1122	5.19	2.2402e+06
1123	5.2	2.2398e+06
1124	5.2	2.22064e+06
1125	5.21	2.19832e+06
1126	5.21	2202855
1127	5.22	2.19483e+06
1128	5.22	2214491
1129	5.23	2.23419e+06
1130	5.23	2262908
1131	5.24	2251545
1132	5.24	2.24926e+06
1133	5.24	2.24883e+06
1134	5.25	2.23834e+06
1135	5.25	2.22385e+06
1136	5.26	2.21484e+06
1137	5.26	2225271
1138	5.27	2.19011e+06
1139	5.27	2.18491e+06
1140	5.28	2.1777e+06
1141	5.28	2.17579e+06
1142	5.29	2.16036e+06
1143	5.29	2.20675e+06
1144	5.3	2239980
1145	5.3	2238657
1146	5.3	2.23795e+06
1147	5.31	2.22983e+06
1148	5.31	2.23116e+06
1149	5.32	2.22847e+06
1150	5.32	2270777
1151	5.33	2270572
1152	5.33	2.27043e+06
1153	5.34	2.25095e+06
1154	5.34	2221231
1155	5.35	2.20282e+06
1156	5.35	2.21668e+06
1157	5.36	2210949
1158	5.36	2.21972e+06
1159	5.36	2.24041e+06
1160	5.37	2244143
1161	5.37	2.23223e+06
1162	5.38	2.2404e+06
1163	5.38	2.24956e+06
1164	5.39	2.24247e+06
1165	5.39	2.24236e+06
1166	5.4	2.23499e+06
1167	5.4	2.22066e+06
1168	5.41	2.19597e+06
1169	5.41	2214636
1170	5.42	2227028
1171	5.42	2.23873e+06
1172	5.42	2.22195e+06
1173	5.43	2.20976e+06
1174	5.43	2.18841e+06
1175	5.44	2196151
1176	5.44	2.2046e+06
1177	5.45	2.21661e+06
1178	5.45	2231043
1179	5.46	2.22955e+06
1180	5.46	2.21295e+06
1181	5.47	2.20752e+06
1182	5.47	2220087
1183	5.48	2.24539e+06
1184	5.48	2.25775e+06
1185	5.49	2.27859e+06
1186	5.49	2.28657e+06
1187	5.49	2.27087e+06
1188	5.5	2.23101e+06
1189	5.5	2.24356e+06
1190	5.51	2.24417e+06
1191	5.51	2254124
1192	5.52	2.2584e+06
1193	5.52	2286629
1194	5.53	2260525
1195	5.53	2.25011e+06
1196	5.54	2.24389e+06
1197	5.54	2245267
1198	5.55	2.22583e+06
1199	5.55	2.23701e+06
1200	5.55	2242047
1201	5.56	2.25225e+06
1202	5.56	2252018
1203	5.57	2.24894e+06
1204	5.57	2.24369e+06
1205	5.58	2237853
1206	5.58	2.25385e+06
1207	5.59	2249185
1208	5.59	2.26437e+06
1209	5.6	2.26638e+06
1210	5.6	2.24442e+06
1211	5.61	2220084
1212	5.61	2.23613e+06
1213	5.61	2.25181e+06
1214	5.62	2.25911e+06
1215	5.62	2.259e+06
1216	5.63	2261474
1217	5.63	2.25039e+06
1218	5.64	2227023
1219	5.64	2.22852e+06
1220	5.65	2.23434e+06
1221	5.65	2.21781e+06
1222	5.66	2.19595e+06
1223	5.66	2.20009e+06
1224	5.67	2.19423e+06
1225	5.67	2.20103e+06
1226	5.67	2217783
1227	5.68	2.24513e+06
1228	5.68	2240481
1229	5.69	2.23124e+06
1230	5.69	2.23138e+06
1231	5.7	2.22852e+06
1232	5.7	2.24716e+06
1233	5.71	2263194
1234	5.71	2.26562e+06
1235	5.72	2.22789e+06
1236	5.72	2.22648e+06
1237	5.73	2.21031e+06
1238	5.73	2.21817e+06
1239	5.73	2239192
1240	5.74	2.27352e+06
1241	5.74	2.27712e+06
1242	5.75	2.27897e+06
1243	5.75	2294788
1244	5.76	2283528
1245	5.76	2.24467e+06
1246	5.77	2.18823e+06
1247	5.77	2.1657e+06
1248	5.78	2.14035e+06
1249	5.78	2.15022e+06
1250	5.79	2.18133e+06
1251	5.79	2.22793e+06
1252	5.8	2246688
1253	5.8	2260680
1254	5.8	2260041
1255	5.81	2.25389e+06
1256	5.81	2.24577e+06
1257	5.82	2.23607e+06
1258	5.82	2.23166e+06
1259	5.83	2.24334e+06
1260	5.83	2.22603e+06
1261	5.84	2232302
1262	5.84	2236725
1263	5.85	2.23426e+06
1264	5.85	2247066
1265	5.86	2.27083e+06
1266	5.86	2.25048e+06
1267	5.86	2.24618e+06
1268	5.87	2.23821e+06
1269	5.87	2.23274e+06
1270	5.88	2228773
1271	5.88	2247374
1272	5.89	2.26441e+06
1273	5.89	2268956
1274	5.9	2250994
1275	5.9	2255851
1276	5.91	2.2423e+06
1277	5.91	2.22995e+06
1278	5.92	2.23232e+06
1279	5.92	2.2508e+06
1280	5.92	2261112
1281	5.93	2.27648e+06
1282	5.93	2262340
1283	5.94	2.25496e+06
1284	5.94	2.23071e+06
1285	5.95	2.21359e+06
1286	5.95	2.18343e+06
1287	5.96	2.17789e+06
1288	5.96	2.17147e+06
1289	5.97	2186979
1290	5.97	2.19835e+06
1291	5.98	2224717
1292	5.98	2.23971e+06
1293	5.98	2.24624e+06
1294	5.99	2.25308e+06
1295	5.99	2244899
1296	6	2249756
1297	6	2253722
1298	6.01	2251078
1299	6.01	2.23304e+06
1300	6.02	2.24613e+06
1301	6.02	2.25935e+06
1302	6.03	2.25813e+06
1303	6.03	2.25135e+06
1304	6.04	2.24403e+06
1305	6.04	2.2391e+06
1306	6.05	2.23031e+06
1307	6.05	2.23438e+06
1308	6.05	2.2415e+06
1309	6.06	2.22839e+06
1310	6.06	2.20818e+06
1311	6.07	2.20367e+06
1312	6.07	2.21023e+06
1313	6.08	2.22698e+06
1314	6.08	2.2587e+06
1315	6.09	2.27405e+06
1316	6.09	2.26792e+06
1317	6.1	2.26651e+06
1318	6.1	2246740
1319	6.11	2.24585e+06
1320	6.11	2.24453e+06
1321	6.11	2.25502e+06
1322	6.12	2.258e+06
1323	6.12	2271711
1324	6.13	2245382
1325	6.13	2224751
1326	6.14	2198908
1327	6.14	2.21698e+06
1328	6.15	2223367
1329	6.15	2.24608e+06
1330	6.16	2245479
1331	6.16	2246811
1332	6.17	2.21933e+06
1333	6.17	2.21029e+06
1334	6.17	2208321
1335	6.18	2.19901e+06
1336	6.18	2.20382e+06
1337	6.19	2.21427e+06
1338	6.19	2225335
1339	6.2	2243008
1340	6.2	2.25809e+06
1341	6.21	2256134
1342	6.21	2.26804e+06
1343	6.22	2.25979e+06
1344	6.22	2.24209e+06
1345	6.23	2.24758e+06
1346	6.23	2.23222e+06
1347	6.23	2.22828e+06
1348	6.24	2253115
1349	6.24	2.27719e+06
1350	6.25	2.27958e+06
1351	6.25	2268787
1352	6.26	2.24054e+06
1353	6.26	2.21153e+06
1354	6.27	2.19691e+06
1355	6.27	2.18913e+06
1356	6.28	2.2044e+06
1357	6.28	2.21472e+06
1358	6.29	2230843
1359	6.29	2.23802e+06
1360	6.3	2.26411e+06
1361	6.3	2.2988e+06
1362	6.3	2.30806e+06
1363	6.31	2.30759e+06
1364	6.31	2311219
1365	6.32	2.28515e+06
1366	6.32	2.264e+06
1367	6.33	2267754
1368	6.33	2276565
1369	6.34	2.27317e+06
1370	6.34	2.28074e+06
1371	6.35	2.26315e+06
1372	6.35	2.2604e+06
1373	6.36	2229120
1374	6.36	2.22214e+06
1375	6.36	2.23442e+06
1376	6.37	2244876
1377	6.37	2.24905e+06
1378	6.38	2267302
1379	6.38	2.2626e+06
1380	6.39	2.25412e+06
1381	6.39	2262363
1382	6.4	2253246
1383	6.4	2.25368e+06
1384	6.41	2.25076e+06
1385	6.41	2.25017e+06
1386	6.42	2.25015e+06
1387	6.42	2.26179e+06
1388	6.42	2258912
1389	6.43	2.2467e+06
1390	6.43	2.24419e+06
1391	6.44	2255771
1392	6.44	2.27226e+06
1393	6.45	2.28902e+06
1394	6.45	2.30679e+06
1395	6.46	2304929
1396	6.46	2.28405e+06
1397	6.47	2.27306e+06
1398	6.47	2.25992e+06
1399	6.48	2.24139e+06
1400	6.48	2.21717e+06
1401	6.48	2.20407e+06
1402	6.49	2.19977e+06
1403	6.49	2.21496e+06
1404	6.5	2.22707e+06
1405	6.5	2.24348e+06
1406	6.51	2.24416e+06
1407	6.51	2.23681e+06
1408	6.52	2217747
1409	6.52	2.22534e+06
1410	6.53	2226423
1411	6.53	2.2258e+06
1412	6.54	2211678
1413	6.54	2.21442e+06
1414	6.54	2215376
1415	6.55	2.23987e+06
1416	6.55	2.25032e+06
1417	6.56	2.27557e+06
1418	6.56	2.27763e+06
1419	6.57	2.27689e+06
1420	6.57	2.24614e+06
1421	6.58	2.26085e+06
1422	6.58	2.26133e+06
1423	6.59	2.27386e+06
1424	6.59	2.29087e+06
1425	6.6	2.3076e+06
1426	6.6	2.29067e+06
1427	6.61	2.27729e+06
1428	6.61	2.27771e+06
1429	6.61	2.26986e+06
1430	6.62	2.27969e+06
1431	6.62	2.27712e+06
1432	6.63	2.27933e+06
1433	6.63	2.27525e+06
1434	6.64	2264118
1435	6.64	2.25879e+06
1436	6.65	2.26834e+06
1437	6.65	2258772
1438	6.66	2239349
1439	6.66	2.25983e+06
1440	6.67	2.27872e+06
1441	6.67	2.30033e+06
1442	6.67	2.31566e+06
1443	6.68	2325757
1444	6.68	2.30573e+06
1445	6.69	2.30101e+06
1446	6.69	2.29451e+06
1447	6.7	2310975
1448	6.7	2.32975e+06
1449	6.71	2.32981e+06
1450	6.71	2.31507e+06
1451	6.72	2.29517e+06
1452	6.72	2.2763e+06
1453	6.73	2.25687e+06
1454	6.73	2.24982e+06
1455	6.73	2250151
1456	6.74	2.26994e+06
1457	6.74	2.28812e+06
1458	6.75	2.30571e+06
1459	6.75	2.31369e+06
1460	6.76	2.29639e+06
1461	6.76	2.2801e+06
1462	6.77	2.2711e+06
1463	6.77	2285805
1464	6.78	2.29615e+06
1465	6.78	2.33821e+06
1466	6.79	2.34684e+06
1467	6.79	2.3603e+06
1468	6.79	2349094
1469	6.8	2.35181e+06
1470	6.8	2.34214e+06
1471	6.81	2.34666e+06
1472	6.81	2.34305e+06
1473	6.82	2.3302e+06
1474	6.82	2.32114e+06
1475	6.83	2.30756e+06
1476	6.83	2.30428e+06
1477	6.84	2.32026e+06
1478	6.84	2.33637e+06
1479	6.85	2.34782e+06
1480	6.85	2.33981e+06
1481	6.86	2342733
1482	6.86	2340990
1483	6.86	2.34313e+06
1484	6.87	2.33286e+06
1485	6.87	2.33006e+06
1486	6.88	2.31624e+06
1487	6.88	2.29521e+06
1488	6.89	2.29488e+06
1489	6.89	2293301
1490	6.9	2.30345e+06
1491	6.9	2.29874e+06
1492	6.91	2326441
1493	6.91	2.30464e+06
1494	6.92	2.29084e+06
1495	6.92	2.26422e+06
1496	6.92	2246324
1497	6.93	2.21243e+06
1498	6.93	2.24006e+06
1499	6.94	2256477
1500	6.94	2.27635e+06
1501	6.95	2.30704e+06
1502	6.95	2.30895e+06
1503	6.96	2.30161e+06
1504	6.96	2.2898e+06
1505	6.97	2.30108e+06
1506	6.97	2.28324e+06
1507	6.98	2.29057e+06
1508	6.98	2.26672e+06
1509	6.98	2.25723e+06
1510	6.99	2.23786e+06
1511	6.99	2.26412e+06
1512	7	2.26947e+06
1513	7	2297863
1514	7.01	2.29415e+06
1515	7.01	2.28231e+06
1516	7.02	2.24304e+06
1517	7.02	2.25061e+06
1518	7.03	2.24809e+06
1519	7.03	2.24767e+06
1520	7.04	2.26585e+06
1521	7.04	2.30158e+06
1522	7.04	2294698
1523	7.05	2276435
1524	7.05	2.27079e+06
1525	7.06	2.26085e+06
1526	7.06	2.24888e+06
1527	7.07	2.26042e+06
1528	7.07	2.2765e+06
1529	7.08	2285808
1530	7.08	2.26339e+06
1531	7.09	2250564
1532	7.09	2.24289e+06
1533	7.1	2246714
1534	7.1	2.25301e+06
1535	7.11	2.27925e+06
1536	7.11	2.28436e+06
1537	7.11	2.27622e+06
1538	7.12	2.26507e+06
1539	7.12	2.26051e+06
1540	7.13	2257593
1541	7.13	2.25973e+06
1542	7.14	2278123
1543	7.14	2.2856e+06
1544	7.15	2.2664e+06
1545	7.15	2246852
1546	7.16	2250295
1547	7.16	2.23193e+06
1548	7.17	2.22612e+06
1549	7.17	2.23123e+06
1550	7.17	2238313
1551	7.18	2.22497e+06
1552	7.18	2.21635e+06
1553	7.19	2.20464e+06
1554	7.19	2214889
1555	7.2	2226954
1556	7.2	2.25329e+06
1557	7.21	2.28405e+06
1558	7.21	2280937
1559	7.22	2.27653e+06
1560	7.22	2.27872e+06
1561	7.23	2.27406e+06
1562	7.23	2.26974e+06
1563	7.23	2.28113e+06
1564	7.24	2.24803e+06
1565	7.24	2239200
1566	7.25	2237612
1567	7.25	2.22704e+06
1568	7.26	2.24668e+06
1569	7.26	2274695
1570	7.27	2271259
1571	7.27	2.27601e+06
1572	7.28	2.31362e+06
1573	7.28	2.31541e+06
1574	7.29	2.33293e+06
1575	7.29	2.34625e+06
1576	7.29	2.35845e+06
1577	7.3	2321996
1578	7.3	2306436
1579	7.31	2.27974e+06
1580	7.31	2.27261e+06
1581	7.32	2.2425e+06
1582	7.32	2.25382e+06
1583	7.33	2259004
1584	7.33	2.25841e+06
1585	7.34	2.24879e+06
1586	7.34	2264703
1587	7.35	2279437
1588	7.35	2.26952e+06
1589	7.36	2291634
1590	7.36	2.30075e+06
1591	7.36	2.30225e+06
1592	7.37	2.28129e+06
1593	7.37	2.28374e+06
1594	7.38	2266167
1595	7.38	2.26829e+06
1596	7.39	2257777
1597	7.39	2.23267e+06
1598	7.4	2.2296e+06
1599	7.4	2.23231e+06
1600	7.41	2.24421e+06
1601	7.41	2.2511e+06
1602	7.42	2.25906e+06
1603	7.42	2.24784e+06
1604	7.42	2223340
1605	7.43	2.20792e+06
1606	7.43	2.20019e+06
1607	7.44	2.21376e+06
1608	7.44	2.19841e+06
1609	7.45	2.18947e+06
1610	7.45	2.19353e+06
1611	7.46	2.19851e+06
1612	7.46	2.20958e+06
1613	7.47	2.22659e+06
1614	7.47	2255935
1615	7.48	2.25968e+06
1616	7.48	2.28227e+06
1617	7.48	2.26039e+06
1618	7.49	2.23434e+06
1619	7.49	2.21626e+06
1620	7.5	2196928
1621	7.5	2184537
1622	7.51	2.20803e+06
1623	7.51	2.22089e+06
1624	7.52	2.21022e+06
1625	7.52	2189469
1626	7.53	2163417
1627	7.53	2.15241e+06
1628	7.54	2150343
1629	7.54	2.16343e+06
1630	7.54	2176119
1631	7.55	2.20821e+06
1632	7.55	2214817
1633	7.56	2.22062e+06
1634	7.56	2.21755e+06
1635	7.57	2.2285e+06
1636	7.57	2203490
1637	7.58	2.21301e+06
1638	7.58	2.24044e+06
1639	7.59	2.24997e+06
1640	7.59	2.25317e+06
1641	7.6	2245197
1642	7.6	2202649
1643	7.6	2202052
1644	7.61	2201360
1645	7.61	2.185e+06
1646	7.62	2.17419e+06
1647	7.62	2.18178e+06
1648	7.63	2.15197e+06
1649	7.63	2.15727e+06
1650	7.64	2174769
1651	7.64	2.18627e+06
1652	7.65	2186229
1653	7.65	2191098
1654	7.66	2.18882e+06
1655	7.66	2182483
1656	7.67	2.18473e+06
1657	7.67	2200211
1658	7.67	2.19229e+06
1659	7.68	2.20858e+06
1660	7.68	2.22978e+06
1661	7.69	2.22778e+06
1662	7.69	2.21326e+06
1663	7.7	2.22419e+06
1664	7.7	2.21586e+06
1665	7.71	2.20468e+06
1666	7.71	2.22488e+06
1667	7.72	2213957
1668	7.72	2.22367e+06
1669	7.73	2.2268e+06
1670	7.73	2235326
1671	7.73	2.21639e+06
1672	7.74	2.21565e+06
1673	7.74	2193160
1674	7.75	2183293
1675	7.75	2.17002e+06
1676	7.76	2154367
1677	7.76	2157228
1678	7.77	2.16482e+06
1679	7.77	2.18441e+06
1680	7.78	2.21674e+06
1681	7.78	2.25406e+06
1682	7.79	2.24942e+06
1683	7.79	2244597
1684	7.79	2243006
1685	7.8	2.25306e+06
1686	7.8	2.24652e+06
1687	7.81	2.26069e+06
1688	7.81	2.24341e+06
1689	7.82	2219539
1690	7.82	2.20232e+06
1691	7.83	2.21327e+06
1692	7.83	2201577
1693	7.84	2.21884e+06
1694	7.84	2211779
1695	7.85	2.20949e+06
1696	7.85	2.22892e+06
1697	7.85	2.24888e+06
1698	7.86	2.25279e+06
1699	7.86	2.25979e+06
1700	7.87	2.25069e+06
1701	7.87	2.21733e+06
1702	7.88	2.19507e+06
1703	7.88	2.18784e+06
1704	7.89	2201705
1705	7.89	2.22299e+06
1706	7.9	2.24897e+06
1707	7.9	2.26765e+06
1708	7.91	2273836
1709	7.91	2.26831e+06
1710	7.92	2.23482e+06
1711	7.92	2.23406e+06
1712	7.92	2.24663e+06
1713	7.93	2.24852e+06
1714	7.93	2266601
1715	7.94	2.30987e+06
1716	7.94	2.29637e+06
1717	7.95	2.2902e+06
1718	7.95	2282240
1719	7.96	2261281
1720	7.96	2238816
1721	7.97	2.24049e+06
1722	7.97	2.21454e+06
1723	7.98	2.20732e+06
1724	7.98	2199870
1725	7.98	2.20874e+06
1726	7.99	2.20704e+06
1727	7.99	2.21546e+06
1728	8	2.19197e+06
1729	8	2179057
1730	8.01	2.18115e+06
1731	8.01	2.1838e+06
1732	8.02	2193109
1733	8.02	2.21332e+06
1734	8.03	2.21879e+06
1735	8.03	2.19021e+06
1736	8.04	2188772
1737	8.04	2.17375e+06
1738	8.04	2.14901e+06
1739	8.05	2.15728e+06
1740	8.05	2151120
1741	8.06	2.15211e+06
1742	8.06	2161658
1743	8.07	2.1682e+06
1744	8.07	2.15914e+06
1745	8.08	2.17581e+06
1746	8.08	2.16843e+06
1747	8.09	2171270
1748	8.09	2.18854e+06
1749	8.1	2178232
1750	8.1	2171273
1751	8.1	2.17145e+06
1752	8.11	2.16788e+06
1753	8.11	2180577
1754	8.12	2.21757e+06
1755	8.12	2.23866e+06
1756	8.13	2244199
1757	8.13	2.24471e+06
1758	8.14	2.24617e+06
1759	8.14	2227112
1760	8.15	2218243
1761	8.15	2.23028e+06
1762	8.16	2239177
1763	8.16	2.24285e+06
1764	8.17	2.29071e+06
1765	8.17	2.32671e+06
1766	8.17	2345783
1767	8.18	2339192
1768	8.18	2333140
1769	8.19	2.29317e+06
1770	8.19	2.2966e+06
1771	8.2	2300156
1772	8.2	2335968
1773	8.21	2.37209e+06
1774	8.21	2419473
1775	8.22	2432999
1776	8.22	2441204
1777	8.23	2.46626e+06
1778	8.23	2459032
1779	8.23	2.46597e+06
1780	8.24	2.46614e+06
1781	8.24	2449195
1782	8.25	2.43054e+06
1783	8.25	2.4172e+06
1784	8.26	2.40642e+06
1785	8.26	2.40664e+06
1786	8.27	2.43435e+06
1787	8.27	2.44735e+06
1788	8.28	2.45734e+06
1789	8.28	2.45391e+06
1790	8.29	2.43754e+06
1791	8.29	2.41108e+06
1792	8.29	2392589
1793	8.3	2.41264e+06
1794	8.3	2.44736e+06
1795	8.31	2.48611e+06
1796	8.31	2.51405e+06
1797	8.32	2.5284e+06
1798	8.32	2524150
1799	8.33	2.4898e+06
1800	8.33	2.48262e+06
1801	8.34	2.47923e+06
1802	8.34	2.49081e+06
1803	8.35	2.48892e+06
1804	8.35	2.49655e+06
1805	8.35	2.47979e+06
1806	8.36	2.45364e+06
1807	8.36	2.43292e+06
1808	8.37	2.41897e+06
1809	8.37	2.41787e+06
1810	8.38	2.40762e+06
1811	8.38	2.40649e+06
1812	8.39	2.38893e+06
1813	8.39	2.37656e+06
1814	8.4	2.32959e+06
1815	8.4	2.30827e+06
1816	8.41	2.28215e+06
1817	8.41	2274469
1818	8.41	2.26158e+06
1819	8.42	2.26832e+06
1820	8.42	2.26514e+06
1821	8.43	2.26229e+06
1822	8.43	2.25132e+06
1823	8.44	2276955
1824	8.44	2.29075e+06
1825	8.45	2.30512e+06
1826	8.45	2.30374e+06
1827	8.46	2.28822e+06
1828	8.46	2241676
1829	8.47	2220871
1830	8.47	2.18938e+06
1831	8.48	2.19228e+06
1832	8.48	2.17401e+06
1833	8.48	2.18689e+06
1834	8.49	2.1955e+06
1835	8.49	2.20315e+06
1836	8.5	2.1913e+06
1837	8.5	2199874
1838	8.51	2.19156e+06
1839	8.51	2.17293e+06
1840	8.52	2.17189e+06
1841	8.52	2.17448e+06
1842	8.53	2.19882e+06
1843	8.53	2.18304e+06
1844	8.54	2.17817e+06
1845	8.54	2.1712e+06
1846	8.54	2.18183e+06
1847	8.55	2.17178e+06
1848	8.55	2.21091e+06
1849	8.56	2.24047e+06
1850	8.56	2.25616e+06
1851	8.57	2.22977e+06
1852	8.57	2.19752e+06
1853	8.58	2.17026e+06
1854	8.58	2.15523e+06
1855	8.59	2.16015e+06
1856	8.59	2.18844e+06
1857	8.6	2212895
1858	8.6	2.20566e+06
1859	8.6	2.19357e+06
1860	8.61	2.15954e+06
1861	8.61	2.16696e+06
1862	8.62	2165597
1863	8.62	2.17561e+06
1864	8.63	2.16846e+06
1865	8.63	2.16788e+06
1866	8.64	2.14248e+06
1867	8.64	2.1419e+06
1868	8.65	2.15158e+06
1869	8.65	2.1841e+06
1870	8.66	2.19498e+06
1871	8.66	2.19267e+06
1872	8.66	2.18376e+06
1873	8.67	2.17797e+06
1874	8.67	2168894
1875	8.68	2.17848e+06
1876	8.68	2186049
1877	8.69	2.17732e+06
1878	8.69	2.17266e+06
1879	8.7	2.19599e+06
1880	8.7	2225157
1881	8.71	2.23064e+06
1882	8.71	2.24915e+06
1883	8.72	2225779
1884	8.72	2.19037e+06
1885	8.73	2.16935e+06
1886	8.73	2.17623e+06
1887	8.73	2.18329e+06
1888	8.74	2203776
1889	8.74	2217737
1890	8.75	2207018
1891	8.75	2.20035e+06
1892	8.76	2.2153e+06
1893	8.76	2.2117e+06
1894	8.77	2.21421e+06
1895	8.77	2.21317e+06
1896	8.78	2.19585e+06
1897	8.78	2.16891e+06
1898	8.79	2.17924e+06
1899	8.79	2.18678e+06
1900	8.79	2199730
1901	8.8	2210629
1902	8.8	2209565
1903	8.81	2.19988e+06
1904	8.81	2192401
1905	8.82	2186438
1906	8.82	2.17035e+06
1907	8.83	2157396
1908	8.83	2149430
1909	8.84	2.13968e+06
1910	8.84	2156167
1911	8.85	2166355
1912	8.85	2.1568e+06
1913	8.85	2.15633e+06
1914	8.86	2.17462e+06
1915	8.86	2.18201e+06
1916	8.87	2.20654e+06
1917	8.87	2.24222e+06
1918	8.88	2.23774e+06
1919	8.88	2.21425e+06
1920	8.89	2.19523e+06
1921	8.89	2176458
1922	8.9	2.16052e+06
1923	8.9	2.16397e+06
1924	8.91	2.18032e+06
1925	8.91	2.19337e+06
1926	8.91	2.22317e+06
1927	8.92	2236664
1928	8.92	2.2748e+06
1929	8.93	2291003
1930	8.93	2.33165e+06
1931	8.94	2349950
1932	8.94	2.35922e+06
1933	8.95	2.36887e+06
1934	8.95	2.37862e+06
1935	8.96	2.39006e+06
1936	8.96	2394427
1937	8.97	2.39842e+06
1938	8.97	2.38675e+06
1939	8.98	2.38627e+06
1940	8.98	2362076
1941	8.98	2366877
1942	8.99	2391900
1943	8.99	2.39107e+06
1944	9	2.38478e+06
1945	9	2.37414e+06
1946	9.01	2352683
1947	9.01	2.32585e+06
1948	9.02	2.30116e+06
1949	9.02	2.30825e+06
1950	9.03	2.32727e+06
1951	9.03	2.34302e+06
1952	9.04	2340484
1953	9.04	2.35238e+06
1954	9.04	2.33005e+06
1955	9.05	2.29897e+06
1956	9.05	2.27097e+06
1957	9.06	2252544
1958	9.06	2.21844e+06
1959	9.07	2.20353e+06
1960	9.07	2.19488e+06
1961	9.08	2.17936e+06
1962	9.08	2180082
1963	9.09	2.18631e+06
1964	9.09	2.19122e+06
1965	9.1	2.17897e+06
1966	9.1	2.18417e+06
1967	9.1	2160042
1968	9.11	2134070
1969	9.11	2118728
1970	9.12	2.12058e+06
1971	9.12	2.09777e+06
1972	9.13	2.09968e+06
1973	9.13	2.11051e+06
1974	9.14	2.10574e+06
1975	9.14	2.09648e+06
1976	9.15	2.11953e+06
1977	9.15	2.13749e+06
1978	9.16	2.1505e+06
1979	9.16	2176480
1980	9.16	2190434
1981	9.17	2.17452e+06
1982	9.17	2.16074e+06
1983	9.18	2.159e+06
1984	9.18	2180163
1985	9.19	2.2192e+06
1986	9.19	2.24796e+06
1987	9.2	2.28319e+06
1988	9.2	2.34521e+06
1989	9.21	2401845
1990	9.21	2.47928e+06
1991	9.22	2.59747e+06
1992	9.22	2.74161e+06
1993	9.23	2.88038e+06
1994	9.23	3.08008e+06
1995	9.23	3.29159e+06
1996	9.24	3.49395e+06
1997	9.24	3.71048e+06
[truncated: 2,327 more rows]
