# Supplementary material for: Electron transfer engineering of artificially designed cell factory for complete biosynthesis of natural products
Source: Research Square preprint supplement (doi:10.21203/rs.3.rs-4718218/v1), 2024-08-01
Supplement: Supplementary file 16 [file TICdata_4608-02.XLS.xls]

## Sheet: Sheet1
+ESI TIC Scan Frag=100.0V CF=0.000 DF=0.000 4608-02.d
Index	X	Y
0	0	2532852
1	0	2.14462e+06
2	0.01	2.19895e+06
3	0.01	2.10738e+06
4	0.02	2.09674e+06
5	0.02	2083402
6	0.03	2072221
7	0.03	2.05477e+06
8	0.04	2072384
9	0.04	2.10199e+06
10	0.05	2133640
11	0.05	2.15129e+06
12	0.06	2159927
13	0.06	2.15913e+06
14	0.06	2.145e+06
15	0.07	2.15286e+06
16	0.07	2.17097e+06
17	0.08	2.18105e+06
18	0.08	2164369
19	0.09	2.15812e+06
20	0.09	2154956
21	0.1	2153517
22	0.1	2.13911e+06
23	0.11	2.13684e+06
24	0.11	2.13002e+06
25	0.12	2.11435e+06
26	0.12	2.10711e+06
27	0.12	2106589
28	0.13	2.08963e+06
29	0.13	2.0818e+06
30	0.14	2.10154e+06
31	0.14	2.12039e+06
32	0.15	2144996
33	0.15	2.15886e+06
34	0.16	2146658
35	0.16	2144116
36	0.17	2.13963e+06
37	0.17	2.12683e+06
38	0.18	2.12685e+06
39	0.18	2.1386e+06
40	0.19	2.11499e+06
41	0.19	2.11182e+06
42	0.19	2117865
43	0.2	2.12454e+06
44	0.2	2.11357e+06
45	0.21	2.12414e+06
46	0.21	2.12931e+06
47	0.22	2138675
48	0.22	2.14199e+06
49	0.23	2162995
50	0.23	2.14755e+06
51	0.24	2.15671e+06
52	0.24	2.15242e+06
53	0.25	2.15326e+06
54	0.25	2.16082e+06
55	0.25	2.20431e+06
56	0.26	2.21226e+06
57	0.26	2.21586e+06
58	0.27	2.18952e+06
59	0.27	2.16036e+06
60	0.28	2129397
61	0.28	2111880
62	0.29	2.12534e+06
63	0.29	2.14672e+06
64	0.3	2.14643e+06
65	0.3	2.15535e+06
66	0.31	2.15509e+06
67	0.31	2.13092e+06
68	0.31	2.11848e+06
69	0.32	2.11242e+06
70	0.32	2.09864e+06
71	0.33	2.11683e+06
72	0.33	2.151e+06
73	0.34	2162873
74	0.34	2.17744e+06
75	0.35	2180116
76	0.35	2151108
77	0.36	2129595
78	0.36	2.11661e+06
79	0.37	2.09392e+06
80	0.37	2.08017e+06
81	0.37	2087517
82	0.38	2.07773e+06
83	0.38	2.09014e+06
84	0.39	2.11681e+06
85	0.39	2.14034e+06
86	0.4	2.15256e+06
87	0.4	2.15428e+06
88	0.41	2.13844e+06
89	0.41	2.11562e+06
90	0.42	2.09731e+06
91	0.42	2.0814e+06
92	0.43	2.09008e+06
93	0.43	2100484
94	0.44	2.10108e+06
95	0.44	2.11314e+06
96	0.44	2.1352e+06
97	0.45	2140973
98	0.45	2.13638e+06
99	0.46	2.13214e+06
100	0.46	2113057
101	0.47	2.07705e+06
102	0.47	2.06807e+06
103	0.48	2.05483e+06
104	0.48	2.05336e+06
105	0.49	2.06043e+06
106	0.49	2.08043e+06
107	0.5	2.07856e+06
108	0.5	2.09496e+06
109	0.5	2.10979e+06
110	0.51	2.10154e+06
111	0.51	2.10975e+06
112	0.52	2.10362e+06
113	0.52	2.10852e+06
114	0.53	2.10503e+06
115	0.53	2.12325e+06
116	0.54	2119935
117	0.54	2.14727e+06
118	0.55	2161344
119	0.55	2.16286e+06
120	0.56	2.18144e+06
121	0.56	2.1716e+06
122	0.56	2.13661e+06
123	0.57	2.11134e+06
124	0.57	2.10459e+06
125	0.58	2.07629e+06
126	0.58	2.06978e+06
127	0.59	2.06964e+06
128	0.59	2.07199e+06
129	0.6	2.09017e+06
130	0.6	2106037
131	0.61	2.14117e+06
132	0.61	2.16326e+06
133	0.62	2.16912e+06
134	0.62	2.16561e+06
135	0.62	2.1451e+06
136	0.63	2125065
137	0.63	2.12489e+06
138	0.64	2.12492e+06
139	0.64	2136643
140	0.65	2.14697e+06
141	0.65	2.1427e+06
142	0.66	2.12641e+06
143	0.66	2.12018e+06
144	0.67	2092589
145	0.67	2.10282e+06
146	0.68	2105426
147	0.68	2110115
148	0.69	2099699
149	0.69	2.11367e+06
150	0.69	2.12591e+06
151	0.7	2.12449e+06
152	0.7	2.13234e+06
153	0.71	2.13073e+06
154	0.71	2.11528e+06
155	0.72	2.1212e+06
156	0.72	2.13939e+06
157	0.73	2.15957e+06
158	0.73	2.14886e+06
159	0.74	2.13444e+06
160	0.74	2.11496e+06
161	0.75	2.12377e+06
162	0.75	2.12623e+06
163	0.75	2.16469e+06
164	0.76	2.1986e+06
165	0.76	2.20802e+06
166	0.77	2.235e+06
167	0.77	2277593
168	0.78	2.29618e+06
169	0.78	2.28938e+06
170	0.79	2.30299e+06
171	0.79	2.31207e+06
172	0.8	2.32204e+06
173	0.8	2.35335e+06
174	0.81	2377528
175	0.81	2.39194e+06
176	0.81	2.41201e+06
177	0.82	2.43298e+06
178	0.82	2.43882e+06
179	0.83	2.43626e+06
180	0.83	2.42942e+06
181	0.84	2.44476e+06
182	0.84	2445676
183	0.85	2.46154e+06
184	0.85	2462999
185	0.86	2441643
186	0.86	2.41819e+06
187	0.87	2.42172e+06
188	0.87	2421034
189	0.87	2.43632e+06
190	0.88	2462114
191	0.88	2.46553e+06
192	0.89	2.49558e+06
193	0.89	2.52336e+06
194	0.9	2.5507e+06
195	0.9	2.55574e+06
196	0.91	2.56734e+06
197	0.91	2.55453e+06
198	0.92	2.56102e+06
199	0.92	2.58341e+06
200	0.93	2.6281e+06
201	0.93	2.66372e+06
202	0.93	2.69617e+06
203	0.94	2.69334e+06
204	0.94	2.67531e+06
205	0.95	2.66023e+06
206	0.95	2637185
207	0.96	2.62576e+06
208	0.96	2639620
209	0.97	2.64849e+06
210	0.97	2632490
211	0.98	2629771
212	0.98	2593268
213	0.99	2588340
214	0.99	2.59884e+06
215	1	2.59682e+06
216	1	2.59981e+06
217	1	2604471
218	1.01	2569777
219	1.01	2563658
220	1.02	2575844
221	1.02	2.57952e+06
222	1.03	2.5601e+06
223	1.03	2.57241e+06
224	1.04	2.55502e+06
225	1.04	2.51699e+06
226	1.05	2.47121e+06
227	1.05	2.45198e+06
228	1.06	2.37998e+06
229	1.06	2.33735e+06
230	1.06	2329460
231	1.07	2.31297e+06
232	1.07	2.29836e+06
233	1.08	2.31465e+06
234	1.08	2.33421e+06
235	1.09	2.35835e+06
236	1.09	2407732
237	1.1	2.4492e+06
238	1.1	2.53468e+06
239	1.11	2.66597e+06
240	1.11	2.85044e+06
241	1.12	3.02114e+06
242	1.12	3179395
243	1.12	3.3626e+06
244	1.13	3541734
245	1.13	3.7119e+06
246	1.14	3.87301e+06
247	1.14	4.06409e+06
248	1.15	4.16376e+06
249	1.15	4.26492e+06
250	1.16	4378195
251	1.16	4.51094e+06
252	1.17	4.57549e+06
253	1.17	4.58948e+06
254	1.18	4.7149e+06
255	1.18	4741374
256	1.18	4791138
257	1.19	4.88833e+06
258	1.19	5.01646e+06
259	1.2	4.94178e+06
260	1.2	4927923
261	1.21	4.86068e+06
262	1.21	4.7728e+06
263	1.22	4.72776e+06
264	1.22	4.67646e+06
265	1.23	4.64768e+06
266	1.23	4.59003e+06
267	1.24	4536252
268	1.24	4482919
269	1.25	4473322
270	1.25	4408692
271	1.25	4.33465e+06
272	1.26	4254557
273	1.26	4.16615e+06
274	1.27	4.09575e+06
275	1.27	4080916
276	1.28	4.04057e+06
277	1.28	3.96315e+06
278	1.29	3.87806e+06
279	1.29	3.8333e+06
280	1.3	3.71609e+06
281	1.3	3.65638e+06
282	1.31	3.59335e+06
283	1.31	3514024
284	1.31	3.46254e+06
285	1.32	3.43377e+06
286	1.32	3.35199e+06
287	1.33	3.25554e+06
288	1.33	3.17742e+06
289	1.34	3.06981e+06
290	1.34	3015266
291	1.35	2950264
292	1.35	2.89692e+06
293	1.36	2.84745e+06
294	1.36	2.81101e+06
295	1.37	2783761
296	1.37	2.77122e+06
297	1.37	2.73058e+06
298	1.38	2.67436e+06
299	1.38	2628276
300	1.39	2587896
301	1.39	2.57365e+06
302	1.4	2.55035e+06
303	1.4	2.50916e+06
304	1.41	2501869
305	1.41	2488326
306	1.42	2.49581e+06
307	1.42	2.50068e+06
308	1.43	2.50372e+06
309	1.43	2.44875e+06
310	1.43	2.42917e+06
311	1.44	2.41852e+06
312	1.44	2.40466e+06
313	1.45	2.39671e+06
314	1.45	2.40072e+06
315	1.46	2.42271e+06
316	1.46	2424070
317	1.47	2.44382e+06
318	1.47	2.44571e+06
319	1.48	2.44117e+06
320	1.48	2.40897e+06
321	1.49	2.42222e+06
322	1.49	2.4201e+06
323	1.5	2.3948e+06
324	1.5	2.36824e+06
325	1.5	2329136
326	1.51	2.27246e+06
327	1.51	2.24877e+06
328	1.52	2.26195e+06
329	1.52	2.24645e+06
330	1.53	2.25062e+06
331	1.53	2.27143e+06
332	1.54	2.26722e+06
333	1.54	2.25016e+06
334	1.55	2.26817e+06
335	1.55	2.25334e+06
336	1.56	2.21429e+06
337	1.56	2.21457e+06
338	1.56	2.23534e+06
339	1.57	2241065
340	1.57	2.25892e+06
341	1.58	2.29943e+06
342	1.58	2.30474e+06
343	1.59	2.27268e+06
344	1.59	2246829
345	1.6	2.24367e+06
346	1.6	2.22093e+06
347	1.61	2210275
348	1.61	2.24556e+06
349	1.62	2.27085e+06
350	1.62	2.26199e+06
351	1.62	2.26657e+06
352	1.63	2.26087e+06
353	1.63	2.23938e+06
354	1.64	2.22488e+06
355	1.64	2.23748e+06
356	1.65	2.24552e+06
357	1.65	2.26649e+06
358	1.66	2.2772e+06
359	1.66	2.27094e+06
360	1.67	2.24535e+06
361	1.67	2.23673e+06
362	1.68	2220773
363	1.68	2.20961e+06
364	1.68	2216094
365	1.69	2216614
366	1.69	2.20905e+06
367	1.7	2227401
368	1.7	2.2301e+06
369	1.71	2.21165e+06
370	1.71	2.21404e+06
371	1.72	2.20766e+06
372	1.72	2.18513e+06
373	1.73	2.19432e+06
374	1.73	2217083
375	1.74	2225232
376	1.74	2.23627e+06
377	1.75	2.24793e+06
378	1.75	2.23423e+06
379	1.75	2.24682e+06
380	1.76	2.23609e+06
381	1.76	2.23318e+06
382	1.77	2.2308e+06
383	1.77	2.22496e+06
384	1.78	2.19831e+06
385	1.78	2.19187e+06
386	1.79	2.19238e+06
387	1.79	2181161
388	1.8	2.18248e+06
389	1.8	2.15723e+06
390	1.81	2.1377e+06
391	1.81	2.13505e+06
392	1.81	2.15016e+06
393	1.82	2.15103e+06
394	1.82	2.17498e+06
395	1.83	2.18566e+06
396	1.83	2.17588e+06
397	1.84	2161155
398	1.84	2.16036e+06
399	1.85	2183430
400	1.85	2.19509e+06
401	1.86	2.21449e+06
402	1.86	2.24234e+06
403	1.87	2.24835e+06
404	1.87	2.22836e+06
405	1.87	2.21677e+06
406	1.88	2.20915e+06
407	1.88	2.19707e+06
408	1.89	2.18595e+06
409	1.89	2174526
410	1.9	2.18346e+06
411	1.9	2.1859e+06
412	1.91	2.20258e+06
413	1.91	2205417
414	1.92	2209391
415	1.92	2.20316e+06
416	1.93	2.18101e+06
417	1.93	2.1628e+06
418	1.93	2.1833e+06
419	1.94	2.16967e+06
420	1.94	2.16635e+06
421	1.95	2.16748e+06
422	1.95	2.15657e+06
423	1.96	2.14185e+06
424	1.96	2160622
425	1.97	2.17127e+06
426	1.97	2.17731e+06
427	1.98	2.18017e+06
428	1.98	2.17703e+06
429	1.99	2.16775e+06
430	1.99	2.17716e+06
431	1.99	2.20037e+06
432	2	2.21751e+06
433	2	2.20744e+06
434	2.01	2.1968e+06
435	2.01	2.19317e+06
436	2.02	2.19524e+06
437	2.02	2.18101e+06
438	2.03	2178810
439	2.03	2.18536e+06
440	2.04	2179767
441	2.04	2.1759e+06
442	2.05	2.19289e+06
443	2.05	2.19775e+06
444	2.06	2160061
445	2.06	2.14076e+06
446	2.06	2.12348e+06
447	2.07	2.11096e+06
448	2.07	2.12457e+06
449	2.08	2178089
450	2.08	2172314
451	2.09	2184292
452	2.09	2.18658e+06
453	2.1	2.16836e+06
454	2.1	2.12258e+06
455	2.11	2.10926e+06
456	2.11	2.10434e+06
457	2.12	2.11182e+06
458	2.12	2.10854e+06
459	2.12	2.14534e+06
460	2.13	2.1646e+06
461	2.13	2171796
462	2.14	2.17458e+06
463	2.14	2.1864e+06
464	2.15	2.17132e+06
465	2.15	2.1819e+06
466	2.16	2.1837e+06
467	2.16	2.18274e+06
468	2.17	2.17375e+06
469	2.17	2161992
470	2.18	2.13721e+06
471	2.18	2.10399e+06
472	2.18	2.09876e+06
473	2.19	2.09079e+06
474	2.19	2.0862e+06
475	2.2	2.09852e+06
476	2.2	2.11596e+06
477	2.21	2.11399e+06
478	2.21	2.11794e+06
479	2.22	2114479
480	2.22	2.0916e+06
481	2.23	2107189
482	2.23	2.12865e+06
483	2.24	2156085
484	2.24	2.16721e+06
485	2.24	2.17634e+06
486	2.25	2166674
487	2.25	2.16232e+06
488	2.26	2.15975e+06
489	2.26	2.15701e+06
490	2.27	2.15206e+06
491	2.27	2155449
492	2.28	2.15136e+06
493	2.28	2.15997e+06
494	2.29	2.14827e+06
495	2.29	2.13807e+06
496	2.3	2116142
497	2.3	2111828
498	2.31	2.10318e+06
499	2.31	2110880
500	2.31	2.1234e+06
501	2.32	2.11931e+06
502	2.32	2128562
503	2.33	2.13896e+06
504	2.33	2.15749e+06
505	2.34	2.16864e+06
506	2.34	2.17776e+06
507	2.35	2163637
508	2.35	2148384
509	2.36	2.13582e+06
510	2.36	2.12289e+06
511	2.37	2.11872e+06
512	2.37	2.14138e+06
513	2.37	2.15617e+06
514	2.38	2.1512e+06
515	2.38	2.14415e+06
516	2.39	2.13699e+06
517	2.39	2.11011e+06
518	2.4	2.10606e+06
519	2.4	2.12079e+06
520	2.41	2117949
521	2.41	2.1371e+06
522	2.42	2.154e+06
523	2.42	2.16409e+06
524	2.43	2.17544e+06
525	2.43	2.18269e+06
526	2.43	2.16823e+06
527	2.44	2.15193e+06
528	2.44	2.12953e+06
529	2.45	2.13185e+06
530	2.45	2141668
531	2.46	2.15505e+06
532	2.46	2.16555e+06
533	2.47	2.17419e+06
534	2.47	2.15123e+06
535	2.48	2.1547e+06
536	2.48	2.15967e+06
537	2.49	2.16871e+06
538	2.49	2.1571e+06
539	2.49	2.15629e+06
540	2.5	2.15015e+06
541	2.5	2.1423e+06
542	2.51	2.14881e+06
543	2.51	2176674
544	2.52	2.17926e+06
545	2.52	2.17218e+06
546	2.53	2.18697e+06
547	2.53	2199380
548	2.54	2.2097e+06
549	2.54	2241057
550	2.55	2.25715e+06
551	2.55	2.24919e+06
552	2.56	2249306
553	2.56	2.23028e+06
554	2.56	2217518
555	2.57	2245493
556	2.57	2.27211e+06
557	2.58	2.29693e+06
558	2.58	2327536
559	2.59	2.34407e+06
560	2.59	2.34325e+06
561	2.6	2.35923e+06
562	2.6	2.37462e+06
563	2.61	2.4003e+06
564	2.61	2.41007e+06
565	2.62	2.42792e+06
566	2.62	2.47044e+06
567	2.62	2.47088e+06
568	2.63	2.48263e+06
569	2.63	2506288
570	2.64	2.51905e+06
571	2.64	2.53029e+06
572	2.65	2.56201e+06
573	2.65	2.58235e+06
574	2.66	2585478
575	2.66	2.63725e+06
576	2.67	2.66441e+06
577	2.67	2725758
578	2.68	2.76212e+06
579	2.68	2795828
580	2.68	2.74804e+06
581	2.69	2.74288e+06
582	2.69	2.73818e+06
583	2.7	2753631
584	2.7	2.77624e+06
585	2.71	2.80435e+06
586	2.71	2.82102e+06
587	2.72	2823529
588	2.72	2.82859e+06
589	2.73	2.84515e+06
590	2.73	2.86692e+06
591	2.74	2.90074e+06
592	2.74	2896732
593	2.74	2.88569e+06
594	2.75	2873106
595	2.75	2871024
596	2.76	2840033
597	2.76	2854133
598	2.77	2.85126e+06
599	2.77	2.86324e+06
600	2.78	2.86635e+06
601	2.78	2.86762e+06
602	2.79	2.85553e+06
603	2.79	2.85519e+06
604	2.8	2.85907e+06
605	2.8	2.85503e+06
606	2.8	2.87822e+06
607	2.81	2.91943e+06
608	2.81	2.93556e+06
609	2.82	2.9296e+06
610	2.82	2.92912e+06
611	2.83	2.89034e+06
612	2.83	2.84083e+06
613	2.84	2.84299e+06
614	2.84	2.83511e+06
615	2.85	2.86469e+06
616	2.85	2.86266e+06
617	2.86	2.86946e+06
618	2.86	2.84007e+06
619	2.87	2.82608e+06
620	2.87	2.811e+06
621	2.87	2.81746e+06
622	2.88	2.82123e+06
623	2.88	2.84111e+06
624	2.89	2.85075e+06
625	2.89	2.82182e+06
626	2.9	2.81506e+06
627	2.9	2779427
628	2.91	2.71382e+06
629	2.91	2697105
630	2.92	2.71929e+06
631	2.92	2707225
632	2.93	2.73619e+06
633	2.93	2.78202e+06
634	2.93	2.8115e+06
635	2.94	2796267
636	2.94	2.79606e+06
637	2.95	2.77526e+06
638	2.95	2764053
639	2.96	2.73456e+06
640	2.96	2.77169e+06
641	2.97	2.77403e+06
642	2.97	2.76306e+06
643	2.98	2.75164e+06
644	2.98	2.76607e+06
645	2.99	2.75881e+06
646	2.99	2.79415e+06
647	2.99	2817765
648	3	2.81869e+06
649	3	2.81661e+06
650	3.01	2.79679e+06
651	3.01	2793081
652	3.02	2.80998e+06
653	3.02	2809635
654	3.03	2818032
655	3.03	2.8263e+06
656	3.04	2.84209e+06
657	3.04	2827040
658	3.05	2.83907e+06
659	3.05	2.84019e+06
660	3.05	2.82628e+06
661	3.06	2.78672e+06
662	3.06	2.78357e+06
663	3.07	2.79332e+06
664	3.07	2784457
665	3.08	2.80804e+06
666	3.08	2.8363e+06
667	3.09	2.847e+06
668	3.09	2.8218e+06
669	3.1	2.79576e+06
670	3.1	2.78996e+06
671	3.11	2.75896e+06
672	3.11	2.75469e+06
673	3.12	2.7387e+06
674	3.12	2.72966e+06
675	3.12	2.70017e+06
676	3.13	2.69682e+06
677	3.13	2.69155e+06
678	3.14	2725816
679	3.14	2.74076e+06
680	3.15	2.73827e+06
681	3.15	2.7232e+06
682	3.16	2.73581e+06
683	3.16	2.72887e+06
684	3.17	2.72791e+06
685	3.17	2.73376e+06
686	3.18	2.72022e+06
687	3.18	2695258
688	3.18	2.7217e+06
689	3.19	2727420
690	3.19	2.73244e+06
691	3.2	2.77044e+06
692	3.2	2.77805e+06
693	3.21	2.76985e+06
694	3.21	2.77533e+06
695	3.22	2.75815e+06
696	3.22	2.72624e+06
697	3.23	2.71166e+06
698	3.23	2.69255e+06
699	3.24	2.67842e+06
700	3.24	2699677
701	3.24	2694458
702	3.25	2721038
703	3.25	2.75191e+06
704	3.26	2.76409e+06
705	3.26	2.72149e+06
706	3.27	2.70917e+06
707	3.27	2.6615e+06
708	3.28	2.6504e+06
709	3.28	2.66941e+06
710	3.29	2.72137e+06
711	3.29	2.73331e+06
712	3.3	2749196
713	3.3	2740933
714	3.3	2745196
715	3.31	2.71639e+06
716	3.31	2697298
717	3.32	2.69834e+06
718	3.32	2695302
719	3.33	2685036
720	3.33	2.70142e+06
721	3.34	2.72871e+06
722	3.34	2.69969e+06
723	3.35	2.68612e+06
724	3.35	2.67603e+06
725	3.36	2.64977e+06
726	3.36	2.64342e+06
727	3.37	2.63155e+06
728	3.37	2.62481e+06
729	3.37	2.63391e+06
730	3.38	2.65078e+06
731	3.38	2.65588e+06
732	3.39	2.68571e+06
733	3.39	2.69969e+06
734	3.4	2687201
735	3.4	2.69137e+06
736	3.41	2.6717e+06
737	3.41	2.68825e+06
738	3.42	2.66517e+06
739	3.42	2.64366e+06
740	3.43	2626157
741	3.43	2.63206e+06
742	3.43	2.62075e+06
743	3.44	2662818
744	3.44	2672521
745	3.45	2.67364e+06
746	3.45	2.66529e+06
747	3.46	2.64293e+06
748	3.46	2.60924e+06
749	3.47	2625734
750	3.47	2.60521e+06
751	3.48	2.61727e+06
752	3.48	2609990
753	3.49	2.60841e+06
754	3.49	2.57969e+06
755	3.49	2.60685e+06
756	3.5	2.60073e+06
757	3.5	2632677
758	3.51	2.64725e+06
759	3.51	2.67654e+06
760	3.52	2.67834e+06
761	3.52	2.66535e+06
762	3.53	2660739
763	3.53	2644415
764	3.54	2.61967e+06
765	3.54	2.59925e+06
766	3.55	2.60288e+06
767	3.55	2.59356e+06
768	3.55	2594334
769	3.56	2.62468e+06
770	3.56	2.62885e+06
771	3.57	2597760
772	3.57	2.57607e+06
773	3.58	2583340
774	3.58	2.55304e+06
775	3.59	2550518
776	3.59	2578395
777	3.6	2.58013e+06
778	3.6	2561729
779	3.61	2.5762e+06
780	3.61	2.57969e+06
781	3.62	2.57434e+06
782	3.62	2.57681e+06
783	3.62	2.56835e+06
784	3.63	2.55221e+06
785	3.63	2561411
786	3.64	2.56975e+06
787	3.64	2.58475e+06
788	3.65	2.59916e+06
789	3.65	2613529
790	3.66	2.61818e+06
791	3.66	2613592
792	3.67	2.61199e+06
793	3.67	2.61129e+06
794	3.68	2.60049e+06
795	3.68	2.5965e+06
796	3.68	2.60842e+06
797	3.69	2.61173e+06
798	3.69	2.60919e+06
799	3.7	2.59105e+06
800	3.7	2567433
801	3.71	2.53799e+06
802	3.71	2.53087e+06
803	3.72	2.5286e+06
804	3.72	2.54234e+06
805	3.73	2.56465e+06
806	3.73	2.56152e+06
807	3.74	2.55006e+06
808	3.74	2.55609e+06
809	3.74	2.55001e+06
810	3.75	2.55837e+06
811	3.75	2.58131e+06
812	3.76	2.57594e+06
813	3.76	2.56824e+06
814	3.77	2561936
815	3.77	2.5228e+06
816	3.78	2.49947e+06
817	3.78	2.48612e+06
818	3.79	2.48813e+06
819	3.79	2.49092e+06
820	3.8	2512674
821	3.8	2.52182e+06
822	3.8	2531432
823	3.81	2.51637e+06
824	3.81	2.50303e+06
825	3.82	2.52443e+06
826	3.82	2.53795e+06
827	3.83	2.54762e+06
828	3.83	2560153
829	3.84	2567731
830	3.84	2533392
831	3.85	2.54422e+06
832	3.85	2.55018e+06
833	3.86	2.55416e+06
834	3.86	2.53877e+06
835	3.86	2.53506e+06
836	3.87	2.51412e+06
837	3.87	2.53335e+06
838	3.88	2527357
839	3.88	2.5377e+06
840	3.89	2.53551e+06
841	3.89	2532971
842	3.9	2514835
843	3.9	2.52396e+06
844	3.91	2530508
845	3.91	2.5349e+06
846	3.92	2516169
847	3.92	2.47956e+06
848	3.93	2.46239e+06
849	3.93	2438991
850	3.93	2.44093e+06
851	3.94	2.45564e+06
852	3.94	2.46443e+06
853	3.95	2.47863e+06
854	3.95	2.49942e+06
855	3.96	2502949
856	3.96	2516903
857	3.97	2535854
858	3.97	2.53457e+06
859	3.98	2.5109e+06
860	3.98	2.52872e+06
861	3.99	2.51778e+06
862	3.99	2.49734e+06
863	3.99	2.47358e+06
864	4	2.4675e+06
865	4	2.43372e+06
866	4.01	2454103
867	4.01	2.47639e+06
868	4.02	2.48851e+06
869	4.02	2.48987e+06
870	4.03	2.46181e+06
871	4.03	2.4562e+06
872	4.04	2.45772e+06
873	4.04	2475728
874	4.05	2497840
875	4.05	2.50545e+06
876	4.05	2.47152e+06
877	4.06	2.43539e+06
878	4.06	2408261
879	4.07	2.39366e+06
880	4.07	2.41258e+06
881	4.08	2418737
882	4.08	2.4271e+06
883	4.09	2.41845e+06
884	4.09	2425587
885	4.1	2.4442e+06
886	4.1	2.47109e+06
887	4.11	2.48935e+06
888	4.11	2.5046e+06
889	4.11	2.4819e+06
890	4.12	2.45129e+06
891	4.12	2.43746e+06
892	4.13	2.42634e+06
893	4.13	2415277
894	4.14	2414529
895	4.14	2.416e+06
896	4.15	2.40897e+06
897	4.15	2.41737e+06
898	4.16	2.43247e+06
899	4.16	2.44499e+06
900	4.17	2.45097e+06
901	4.17	2458146
902	4.18	2.44785e+06
903	4.18	2.43337e+06
904	4.18	2425823
905	4.19	2395133
906	4.19	2382921
907	4.2	2.37516e+06
908	4.2	2375404
909	4.21	2.40898e+06
910	4.21	2.44264e+06
911	4.22	2.43497e+06
912	4.22	2.43472e+06
913	4.23	2.43225e+06
914	4.23	2.39603e+06
915	4.24	2.39112e+06
916	4.24	2.41937e+06
917	4.24	2.42336e+06
918	4.25	2.42823e+06
919	4.25	2.44506e+06
920	4.26	2.46237e+06
921	4.26	2.4263e+06
922	4.27	2.42293e+06
923	4.27	2392051
924	4.28	2.3758e+06
925	4.28	2.34259e+06
926	4.29	2.34557e+06
927	4.29	2.34865e+06
928	4.3	2.37264e+06
929	4.3	2.37204e+06
930	4.3	2.38317e+06
931	4.31	2.39158e+06
932	4.31	2.38962e+06
933	4.32	2.41072e+06
934	4.32	2.4583e+06
935	4.33	2.49186e+06
936	4.33	2.50303e+06
937	4.34	2.47531e+06
938	4.34	2451697
939	4.35	2.42104e+06
940	4.35	2.37747e+06
941	4.36	2.364e+06
942	4.36	2.36325e+06
943	4.36	2.35409e+06
944	4.37	2.34234e+06
945	4.37	2368033
946	4.38	2386980
947	4.38	2.374e+06
948	4.39	2.36512e+06
949	4.39	2.37285e+06
950	4.4	2.34073e+06
951	4.4	2.31343e+06
952	4.41	2.31927e+06
953	4.41	2314235
954	4.42	2.30076e+06
955	4.42	2.33492e+06
956	4.43	2.34853e+06
957	4.43	2.348e+06
958	4.43	2.32975e+06
959	4.44	2.32638e+06
960	4.44	2.31358e+06
961	4.45	2.31237e+06
962	4.45	2.30076e+06
963	4.46	2.30097e+06
964	4.46	2.30654e+06
965	4.47	2.29771e+06
966	4.47	2285026
967	4.48	2.28293e+06
968	4.48	2.27669e+06
969	4.49	2.26627e+06
970	4.49	2.27299e+06
971	4.49	2.27922e+06
972	4.5	2.30318e+06
973	4.5	2.30038e+06
974	4.51	2.29746e+06
975	4.51	2.28615e+06
976	4.52	2.28163e+06
977	4.52	2.29183e+06
978	4.53	2.30188e+06
979	4.53	2.31182e+06
980	4.54	2.31105e+06
981	4.54	2.31368e+06
982	4.55	2.28472e+06
983	4.55	2.27576e+06
984	4.55	2264364
985	4.56	2.27567e+06
986	4.56	2.27201e+06
987	4.57	2.26391e+06
988	4.57	2.26906e+06
989	4.58	2.27551e+06
990	4.58	2.25862e+06
991	4.59	2.2307e+06
992	4.59	2.22557e+06
993	4.6	2.2141e+06
994	4.6	2.1981e+06
995	4.61	2.22212e+06
996	4.61	2246214
997	4.61	2253662
998	4.62	2.25536e+06
999	4.62	2266710
1000	4.63	2.26231e+06
1001	4.63	2.28182e+06
1002	4.64	2.28856e+06
1003	4.64	2.30097e+06
1004	4.65	2.27873e+06
1005	4.65	2.27931e+06
1006	4.66	2.2451e+06
1007	4.66	2.23068e+06
1008	4.67	2.21975e+06
1009	4.67	2.22389e+06
1010	4.67	2.20879e+06
1011	4.68	2.19933e+06
1012	4.68	2.19855e+06
1013	4.69	2187094
1014	4.69	2.18367e+06
1015	4.7	2.17929e+06
1016	4.7	2188924
1017	4.71	2.20046e+06
1018	4.71	2.20724e+06
1019	4.72	2.21868e+06
1020	4.72	2.21447e+06
1021	4.73	2.23599e+06
1022	4.73	2.23078e+06
1023	4.74	2.25376e+06
1024	4.74	2.26623e+06
1025	4.74	2256582
1026	4.75	2.23901e+06
1027	4.75	2225757
1028	4.76	2203759
1029	4.76	2.1856e+06
1030	4.77	2.20497e+06
1031	4.77	2198880
1032	4.78	2.21631e+06
1033	4.78	2214666
1034	4.79	2.22338e+06
1035	4.79	2206769
1036	4.8	2191584
1037	4.8	2.18544e+06
1038	4.8	2.19287e+06
1039	4.81	2.18926e+06
1040	4.81	2.18638e+06
1041	4.82	2.18973e+06
1042	4.82	2182711
1043	4.83	2198987
1044	4.83	2.19237e+06
1045	4.84	2.19684e+06
1046	4.84	2.18741e+06
1047	4.85	2.18868e+06
1048	4.85	2.19213e+06
1049	4.86	2196713
1050	4.86	2.20938e+06
1051	4.86	2.20641e+06
1052	4.87	2.19756e+06
1053	4.87	2.18896e+06
1054	4.88	2.21725e+06
1055	4.88	2.21095e+06
1056	4.89	2237726
1057	4.89	2.24376e+06
1058	4.9	2.25897e+06
1059	4.9	2.26376e+06
1060	4.91	2.27121e+06
1061	4.91	2264237
1062	4.92	2.25942e+06
1063	4.92	2.23109e+06
1064	4.92	2198319
1065	4.93	2184331
1066	4.93	2.1772e+06
1067	4.94	2178127
1068	4.94	2.19487e+06
1069	4.95	2.21611e+06
1070	4.95	2.22841e+06
1071	4.96	2.24209e+06
1072	4.96	2.25995e+06
1073	4.97	2.26978e+06
1074	4.97	2.26165e+06
1075	4.98	2.25178e+06
1076	4.98	2.23343e+06
1077	4.99	2231117
1078	4.99	2.21888e+06
1079	4.99	2.23055e+06
1080	5	2.25049e+06
1081	5	2.25586e+06
1082	5.01	2251327
1083	5.01	2.24568e+06
1084	5.02	2.21833e+06
1085	5.02	2.16982e+06
1086	5.03	2.15348e+06
1087	5.03	2.13226e+06
1088	5.04	2148232
1089	5.04	2163795
1090	5.05	2.18764e+06
1091	5.05	2.189e+06
1092	5.05	2178034
1093	5.06	2.13859e+06
1094	5.06	2.12814e+06
1095	5.07	2125562
1096	5.07	2.14311e+06
1097	5.08	2.16642e+06
1098	5.08	2.20626e+06
1099	5.09	2.21933e+06
1100	5.09	2.22422e+06
1101	5.1	2208091
1102	5.1	2.18791e+06
1103	5.11	2.15836e+06
1104	5.11	2.14958e+06
1105	5.11	2.15356e+06
1106	5.12	2.15805e+06
1107	5.12	2.16022e+06
1108	5.13	2.15978e+06
1109	5.13	2.13988e+06
1110	5.14	2130230
1111	5.14	2.14555e+06
1112	5.15	2.15433e+06
1113	5.15	2150027
1114	5.16	2.1675e+06
1115	5.16	2161071
1116	5.17	2154498
1117	5.17	2.159e+06
1118	5.17	2.1732e+06
1119	5.18	2.16819e+06
1120	5.18	2.15783e+06
1121	5.19	2.14342e+06
1122	5.19	2.13562e+06
1123	5.2	2135472
1124	5.2	2.16281e+06
1125	5.21	2.20311e+06
1126	5.21	2.23186e+06
1127	5.22	2.25593e+06
1128	5.22	2.25952e+06
1129	5.23	2236774
1130	5.23	2.22342e+06
1131	5.24	2198967
1132	5.24	2.16423e+06
1133	5.24	2.15702e+06
1134	5.25	2.1579e+06
1135	5.25	2.17387e+06
1136	5.26	2.18963e+06
1137	5.26	2191825
1138	5.27	2.18959e+06
1139	5.27	2207301
1140	5.28	2.19372e+06
1141	5.28	2.19032e+06
1142	5.29	2.19076e+06
1143	5.29	2183486
1144	5.3	2163141
1145	5.3	2.18429e+06
1146	5.3	2.19239e+06
1147	5.31	2.19451e+06
1148	5.31	2.18288e+06
1149	5.32	2177626
1150	5.32	2.1659e+06
1151	5.33	2164247
1152	5.33	2.17819e+06
1153	5.34	2.1937e+06
1154	5.34	2.20465e+06
1155	5.35	2.19379e+06
1156	5.35	2.20215e+06
1157	5.36	2200327
1158	5.36	2.18858e+06
1159	5.36	2.1786e+06
1160	5.37	2.18358e+06
1161	5.37	2188762
1162	5.38	2.15115e+06
1163	5.38	2.139e+06
1164	5.39	2122544
1165	5.39	2124389
1166	5.4	2.1262e+06
1167	5.4	2174322
1168	5.41	2197527
1169	5.41	2189965
1170	5.42	2.17652e+06
1171	5.42	2.16138e+06
1172	5.42	2.16109e+06
1173	5.43	2.15463e+06
1174	5.43	2.17008e+06
1175	5.44	2.17731e+06
1176	5.44	2.18717e+06
1177	5.45	2171264
1178	5.45	2.18043e+06
1179	5.46	2175931
1180	5.46	2146312
1181	5.47	2.12721e+06
1182	5.47	2.1254e+06
1183	5.48	2.11675e+06
1184	5.48	2.11159e+06
1185	5.49	2126194
1186	5.49	2149470
1187	5.49	2.16972e+06
1188	5.5	2.18712e+06
1189	5.5	2.21919e+06
1190	5.51	2.2363e+06
1191	5.51	2.23121e+06
1192	5.52	2.20225e+06
1193	5.52	2.20574e+06
1194	5.53	2.18387e+06
1195	5.53	2.17297e+06
1196	5.54	2.16969e+06
1197	5.54	2.20331e+06
1198	5.55	2169036
1199	5.55	2.17033e+06
1200	5.55	2.17669e+06
1201	5.56	2.16434e+06
1202	5.56	2.13998e+06
1203	5.57	2.14626e+06
1204	5.57	2.13145e+06
1205	5.58	2.11437e+06
1206	5.58	2.12503e+06
1207	5.59	2.14302e+06
1208	5.59	2153230
1209	5.6	2164851
1210	5.6	2181877
1211	5.61	2.19012e+06
1212	5.61	2.17064e+06
1213	5.61	2145661
1214	5.62	2.14051e+06
1215	5.62	2.13436e+06
1216	5.63	2.15065e+06
1217	5.63	2.16851e+06
1218	5.64	2.18711e+06
1219	5.64	2.17185e+06
1220	5.65	2.16052e+06
1221	5.65	2.14923e+06
1222	5.66	2.14908e+06
1223	5.66	2.13955e+06
1224	5.67	2.15766e+06
1225	5.67	2.1635e+06
1226	5.67	2.16331e+06
1227	5.68	2.17797e+06
1228	5.68	2.20425e+06
1229	5.69	2.22116e+06
1230	5.69	2.23624e+06
1231	5.7	2240159
1232	5.7	2.24228e+06
1233	5.71	2212221
1234	5.71	2180022
1235	5.72	2.16829e+06
1236	5.72	2.1577e+06
1237	5.73	2.144e+06
1238	5.73	2.14459e+06
1239	5.73	2.14161e+06
1240	5.74	2132172
1241	5.74	2.14856e+06
1242	5.75	2.1496e+06
1243	5.75	2160048
1244	5.76	2.17156e+06
1245	5.76	2181222
1246	5.77	2.17874e+06
1247	5.77	2.16349e+06
1248	5.78	2.15561e+06
1249	5.78	2158319
1250	5.79	2.16108e+06
1251	5.79	2.15505e+06
1252	5.8	2.20066e+06
1253	5.8	2.20264e+06
1254	5.8	2200020
1255	5.81	2221441
1256	5.81	2224236
1257	5.82	2188052
1258	5.82	2.20325e+06
1259	5.83	2.20241e+06
1260	5.83	2201314
1261	5.84	2.20471e+06
1262	5.84	2.18717e+06
1263	5.85	2.16168e+06
1264	5.85	2173371
1265	5.86	2.18597e+06
1266	5.86	2.21413e+06
1267	5.86	2.23196e+06
1268	5.87	2222051
1269	5.87	2.19039e+06
1270	5.88	2.14495e+06
1271	5.88	2131003
1272	5.89	2122890
1273	5.89	2.11854e+06
1274	5.9	2.12899e+06
1275	5.9	2.15826e+06
1276	5.91	2173037
1277	5.91	2.16717e+06
1278	5.92	2.17055e+06
1279	5.92	2.17064e+06
1280	5.92	2.1815e+06
1281	5.93	2.17598e+06
1282	5.93	2.20376e+06
1283	5.94	2.18529e+06
1284	5.94	2.16972e+06
1285	5.95	2171708
1286	5.95	2.16533e+06
1287	5.96	2.16249e+06
1288	5.96	2173251
1289	5.97	2165512
1290	5.97	2.13728e+06
1291	5.98	2.14068e+06
1292	5.98	2132086
1293	5.98	2.14277e+06
1294	5.99	2.14838e+06
1295	5.99	2.15499e+06
1296	6	2176389
1297	6	2.18862e+06
1298	6.01	2.18733e+06
1299	6.01	2.16911e+06
1300	6.02	2188837
1301	6.02	2180814
1302	6.03	2.16952e+06
1303	6.03	2.15301e+06
1304	6.04	2.16631e+06
1305	6.04	2.14358e+06
1306	6.05	2.1352e+06
1307	6.05	2122026
1308	6.05	2.14111e+06
1309	6.06	2155777
1310	6.06	2169622
1311	6.07	2.18153e+06
1312	6.07	2.22199e+06
1313	6.08	2.22278e+06
1314	6.08	2.21004e+06
1315	6.09	2198675
1316	6.09	2.19519e+06
1317	6.1	2.18441e+06
1318	6.1	2.17116e+06
1319	6.11	2184547
1320	6.11	2.19516e+06
1321	6.11	2.20369e+06
1322	6.12	2211671
1323	6.12	2208285
1324	6.13	2.19722e+06
1325	6.13	2177268
1326	6.14	2.15298e+06
1327	6.14	2143748
1328	6.15	2159950
1329	6.15	2171504
1330	6.16	2.1858e+06
1331	6.16	2.21145e+06
1332	6.17	2.20614e+06
1333	6.17	2.20753e+06
1334	6.17	2191128
1335	6.18	2.18737e+06
1336	6.18	2.18767e+06
1337	6.19	2192658
1338	6.19	2.18806e+06
1339	6.2	2.20356e+06
1340	6.2	2.20402e+06
1341	6.21	2187876
1342	6.21	2.18257e+06
1343	6.22	2181855
1344	6.22	2.16781e+06
1345	6.23	2.16922e+06
1346	6.23	2.17002e+06
1347	6.23	2.18684e+06
1348	6.24	2.18284e+06
1349	6.24	2186530
1350	6.25	2.18422e+06
1351	6.25	2.18061e+06
1352	6.26	2.17446e+06
1353	6.26	2.16988e+06
1354	6.27	2.175e+06
1355	6.27	2.14907e+06
1356	6.28	2161987
1357	6.28	2.15235e+06
1358	6.29	2169191
1359	6.29	2.14546e+06
1360	6.3	2166963
1361	6.3	2160576
1362	6.3	2.19191e+06
1363	6.31	2.20292e+06
1364	6.31	2.23274e+06
1365	6.32	2223161
1366	6.32	2210976
1367	6.33	2.19605e+06
1368	6.33	2195506
1369	6.34	2.18288e+06
1370	6.34	2.19017e+06
1371	6.35	2187608
1372	6.35	2.17946e+06
1373	6.36	2.16971e+06
1374	6.36	2.19248e+06
1375	6.36	2.18826e+06
1376	6.37	2.19981e+06
1377	6.37	2207071
1378	6.38	2.21674e+06
1379	6.38	2.18875e+06
1380	6.39	2175671
1381	6.39	2.16456e+06
1382	6.4	2.15494e+06
1383	6.4	2.16174e+06
1384	6.41	2.18816e+06
1385	6.41	2.19258e+06
1386	6.42	2184798
1387	6.42	2.1729e+06
1388	6.42	2.14773e+06
1389	6.43	2.12392e+06
1390	6.43	2150017
1391	6.44	2.16476e+06
1392	6.44	2184140
1393	6.45	2.20838e+06
1394	6.45	2.23628e+06
1395	6.46	2.20774e+06
1396	6.46	2.18843e+06
1397	6.47	2.18795e+06
1398	6.47	2.17842e+06
1399	6.48	2.16387e+06
1400	6.48	2170629
1401	6.48	2.18087e+06
1402	6.49	2.17638e+06
1403	6.49	2.18304e+06
1404	6.5	2.18818e+06
1405	6.5	2.20519e+06
1406	6.51	2.18693e+06
1407	6.51	2.1944e+06
1408	6.52	2199268
1409	6.52	2.1983e+06
1410	6.53	2177375
1411	6.53	2.18035e+06
1412	6.54	2.15634e+06
1413	6.54	2.15289e+06
1414	6.54	2.17705e+06
1415	6.55	2.20166e+06
1416	6.55	2225489
1417	6.56	2226090
1418	6.56	2.23545e+06
1419	6.57	2244955
1420	6.57	2.23579e+06
1421	6.58	2.21481e+06
1422	6.58	2.2083e+06
1423	6.59	2.20184e+06
1424	6.59	2183358
1425	6.6	2.2214e+06
1426	6.6	2.24419e+06
1427	6.61	2.24352e+06
1428	6.61	2.23014e+06
1429	6.61	2213398
1430	6.62	2.19842e+06
1431	6.62	2.18284e+06
1432	6.63	2194836
1433	6.63	2.20296e+06
1434	6.64	2.23359e+06
1435	6.64	2.23555e+06
1436	6.65	2.23607e+06
1437	6.65	2234454
1438	6.66	2.21908e+06
1439	6.66	2.19696e+06
1440	6.67	2.19638e+06
1441	6.67	2.2007e+06
1442	6.67	2207979
1443	6.68	2.22431e+06
1444	6.68	2222081
1445	6.69	2199031
1446	6.69	2185323
1447	6.7	2170227
1448	6.7	2.15657e+06
1449	6.71	2.17434e+06
1450	6.71	2.20431e+06
1451	6.72	2.22189e+06
1452	6.72	2.24015e+06
1453	6.73	2259306
1454	6.73	2.26861e+06
1455	6.73	2252837
1456	6.74	2238100
1457	6.74	2.21153e+06
1458	6.75	2.20824e+06
1459	6.75	2.21343e+06
1460	6.76	2.23406e+06
1461	6.76	2.25103e+06
1462	6.77	2.26042e+06
1463	6.77	2.26701e+06
1464	6.78	2.25667e+06
1465	6.78	2.25246e+06
1466	6.79	2270969
1467	6.79	2.27421e+06
1468	6.79	2289156
1469	6.8	2.30521e+06
1470	6.8	2317770
1471	6.81	2.32241e+06
1472	6.81	2322727
1473	6.82	2.30623e+06
1474	6.82	2299982
1475	6.83	2.30562e+06
1476	6.83	2.30063e+06
1477	6.84	2.2942e+06
1478	6.84	2.31956e+06
1479	6.85	2326135
1480	6.85	2.32532e+06
1481	6.86	2.32287e+06
1482	6.86	2.33808e+06
1483	6.86	2.31994e+06
1484	6.87	2.30525e+06
1485	6.87	2.28079e+06
1486	6.88	2281315
1487	6.88	2.27138e+06
1488	6.89	2.27305e+06
1489	6.89	2.27532e+06
1490	6.9	2.26344e+06
1491	6.9	2245134
1492	6.91	2.24536e+06
1493	6.91	2.24047e+06
1494	6.92	2.25137e+06
1495	6.92	2.25842e+06
1496	6.92	2.24602e+06
1497	6.93	2.24125e+06
1498	6.93	2.25391e+06
1499	6.94	2.25634e+06
1500	6.94	2.26859e+06
1501	6.95	2269171
1502	6.95	2.24127e+06
1503	6.96	2.22689e+06
1504	6.96	2.23759e+06
1505	6.97	2.24214e+06
1506	6.97	2.25782e+06
1507	6.98	2.28032e+06
1508	6.98	2.29053e+06
1509	6.98	2.27705e+06
1510	6.99	2290132
1511	6.99	2284207
1512	7	2263462
1513	7	2.23303e+06
1514	7.01	2.24467e+06
1515	7.01	2.22144e+06
1516	7.02	2227922
1517	7.02	2227426
1518	7.03	2236366
1519	7.03	2.23995e+06
1520	7.04	2.25464e+06
1521	7.04	2268030
1522	7.04	2277897
1523	7.05	2257576
1524	7.05	2232243
1525	7.06	2.21656e+06
1526	7.06	2.20823e+06
1527	7.07	2.19712e+06
1528	7.07	2.21211e+06
1529	7.08	2.20273e+06
1530	7.08	2.18201e+06
1531	7.09	2.16871e+06
1532	7.09	2.19087e+06
1533	7.1	2.19148e+06
1534	7.1	2.17867e+06
1535	7.11	2.21055e+06
1536	7.11	2.19979e+06
1537	7.11	2.20005e+06
1538	7.12	2.20441e+06
1539	7.12	2.23563e+06
1540	7.13	2205216
1541	7.13	2.21412e+06
1542	7.14	2.19009e+06
1543	7.14	2.1911e+06
1544	7.15	2.20057e+06
1545	7.15	2.21976e+06
1546	7.16	2.22609e+06
1547	7.16	2.24645e+06
1548	7.17	2.22523e+06
1549	7.17	2.19718e+06
1550	7.17	2.18373e+06
1551	7.18	2156441
1552	7.18	2151486
1553	7.19	2.16505e+06
1554	7.19	2.16642e+06
1555	7.2	2.15215e+06
1556	7.2	2.1576e+06
1557	7.21	2.14171e+06
1558	7.21	2149288
1559	7.22	2.18005e+06
1560	7.22	2217388
1561	7.23	2.25102e+06
1562	7.23	2277681
1563	7.23	2.28126e+06
1564	7.24	2.26275e+06
1565	7.24	2.23839e+06
1566	7.25	2.21345e+06
1567	7.25	2.18863e+06
1568	7.26	2.18365e+06
1569	7.26	2174365
1570	7.27	2.17586e+06
1571	7.27	2.18318e+06
1572	7.28	2196646
1573	7.28	2193624
1574	7.29	2.21255e+06
1575	7.29	2.22645e+06
1576	7.29	2215126
1577	7.3	2.22365e+06
1578	7.3	2226949
1579	7.31	2.23063e+06
1580	7.31	2.22536e+06
1581	7.32	2.24658e+06
1582	7.32	2.2628e+06
1583	7.33	2.26328e+06
1584	7.33	2.24906e+06
1585	7.34	2.23657e+06
1586	7.34	2.20423e+06
1587	7.35	2158027
1588	7.35	2177565
1589	7.36	2.20235e+06
1590	7.36	2.2158e+06
1591	7.36	2.22953e+06
1592	7.37	2250168
1593	7.37	2228688
1594	7.38	2.20888e+06
1595	7.38	2216216
1596	7.39	2225678
1597	7.39	2.21193e+06
1598	7.4	2.19897e+06
1599	7.4	2191950
1600	7.41	2.17477e+06
1601	7.41	2147311
1602	7.42	2.14775e+06
1603	7.42	2149494
1604	7.42	2.14038e+06
1605	7.43	2.1439e+06
1606	7.43	2.16009e+06
1607	7.44	2.15444e+06
1608	7.44	2.15933e+06
1609	7.45	2.16071e+06
1610	7.45	2.15742e+06
1611	7.46	2.15979e+06
1612	7.46	2.15535e+06
1613	7.47	2.1411e+06
1614	7.47	2.14707e+06
1615	7.48	2.16117e+06
1616	7.48	2.15209e+06
1617	7.48	2.17422e+06
1618	7.49	2.16766e+06
1619	7.49	2.15783e+06
1620	7.5	2.13002e+06
1621	7.5	2.12197e+06
1622	7.51	2.12239e+06
1623	7.51	2.14742e+06
1624	7.52	2.15496e+06
1625	7.52	2.16964e+06
1626	7.53	2.18463e+06
1627	7.53	2177115
1628	7.54	2.1687e+06
1629	7.54	2165283
1630	7.54	2168023
1631	7.55	2.15005e+06
1632	7.55	2.14045e+06
1633	7.56	2.1628e+06
1634	7.56	2.16937e+06
1635	7.57	2.1664e+06
1636	7.57	2.177e+06
1637	7.58	2.16156e+06
1638	7.58	2.15622e+06
1639	7.59	2.16468e+06
1640	7.59	2.16979e+06
1641	7.6	2163555
1642	7.6	2.17803e+06
1643	7.6	2176329
1644	7.61	2.18598e+06
1645	7.61	2.19372e+06
1646	7.62	2.19004e+06
1647	7.62	2.16237e+06
1648	7.63	2.15231e+06
1649	7.63	2147897
1650	7.64	2.15301e+06
1651	7.64	2.16574e+06
1652	7.65	2.16348e+06
1653	7.65	2.1462e+06
1654	7.66	2.13404e+06
1655	7.66	2.1222e+06
1656	7.67	2135169
1657	7.67	2.1406e+06
1658	7.67	2.13986e+06
1659	7.68	2.15268e+06
1660	7.68	2.15542e+06
1661	7.69	2.15373e+06
1662	7.69	2.15505e+06
1663	7.7	2126676
1664	7.7	2113438
1665	7.71	2.11523e+06
1666	7.71	2.11299e+06
1667	7.72	2.12658e+06
1668	7.72	2.16254e+06
1669	7.73	2150171
1670	7.73	2.14248e+06
1671	7.73	2.14596e+06
1672	7.74	2.14654e+06
1673	7.74	2.13712e+06
1674	7.75	2.16355e+06
1675	7.75	2.18567e+06
1676	7.76	2189567
1677	7.76	2187970
1678	7.77	2.1709e+06
1679	7.77	2.15682e+06
1680	7.78	2.15193e+06
1681	7.78	2.15732e+06
1682	7.79	2.14997e+06
1683	7.79	2.16615e+06
1684	7.79	2.13687e+06
1685	7.8	2132939
1686	7.8	2154883
1687	7.81	2.18546e+06
1688	7.81	2.1562e+06
1689	7.82	2152599
1690	7.82	2.1369e+06
1691	7.83	2.09835e+06
1692	7.83	2.10401e+06
1693	7.84	2.1274e+06
1694	7.84	2.12768e+06
1695	7.85	2117862
1696	7.85	2142407
1697	7.85	2.13159e+06
1698	7.86	2.13846e+06
1699	7.86	2.14591e+06
1700	7.87	2.15097e+06
1701	7.87	2.15296e+06
1702	7.88	2161557
1703	7.88	2.14423e+06
1704	7.89	2.13749e+06
1705	7.89	2.1255e+06
1706	7.9	2115243
1707	7.9	2.12163e+06
1708	7.91	2159988
1709	7.91	2.16791e+06
1710	7.92	2.1739e+06
1711	7.92	2.18402e+06
1712	7.92	2.18516e+06
1713	7.93	2171228
1714	7.93	2173936
1715	7.94	2.17115e+06
1716	7.94	2163672
1717	7.95	2155756
1718	7.95	2138637
1719	7.96	2124097
1720	7.96	2.1366e+06
1721	7.97	2.13833e+06
1722	7.97	2.14761e+06
1723	7.98	2.14463e+06
1724	7.98	2.1376e+06
1725	7.98	2.12081e+06
1726	7.99	2.14339e+06
1727	7.99	2.13719e+06
1728	8	2.15233e+06
1729	8	2.16166e+06
1730	8.01	2155418
1731	8.01	2.14177e+06
1732	8.02	2.16529e+06
1733	8.02	2.15007e+06
1734	8.03	2.12145e+06
1735	8.03	2.10714e+06
1736	8.04	2.09884e+06
1737	8.04	2.0959e+06
1738	8.04	2.12227e+06
1739	8.05	2.14732e+06
1740	8.05	2.14649e+06
1741	8.06	2129911
1742	8.06	2.11209e+06
1743	8.07	2.10324e+06
1744	8.07	2101107
1745	8.08	2.11639e+06
1746	8.08	2.12789e+06
1747	8.09	2.13738e+06
1748	8.09	2.14373e+06
1749	8.1	2.13167e+06
1750	8.1	2131826
1751	8.1	2146484
1752	8.11	2.15101e+06
1753	8.11	2.16367e+06
1754	8.12	2201305
1755	8.12	2207354
1756	8.13	2.20703e+06
1757	8.13	2.23729e+06
1758	8.14	2225558
1759	8.14	2.22593e+06
1760	8.15	2.22301e+06
1761	8.15	2.21772e+06
1762	8.16	2.21575e+06
1763	8.16	2.2535e+06
1764	8.17	2.28159e+06
1765	8.17	2312467
1766	8.17	2.32272e+06
1767	8.18	2.29772e+06
1768	8.18	2.28052e+06
1769	8.19	2.27604e+06
1770	8.19	2.30259e+06
1771	8.2	2320460
1772	8.2	2.33135e+06
1773	8.21	2.32489e+06
1774	8.21	2320307
1775	8.22	2.32926e+06
1776	8.22	2338924
1777	8.23	2.35244e+06
1778	8.23	2371738
1779	8.23	2.37887e+06
1780	8.24	2.36205e+06
1781	8.24	2.37696e+06
1782	8.25	2403105
1783	8.25	2.4038e+06
1784	8.26	2421477
1785	8.26	2.44431e+06
1786	8.27	2.45629e+06
1787	8.27	2461680
1788	8.28	2481559
1789	8.28	2470716
1790	8.29	2.46926e+06
1791	8.29	2465895
1792	8.29	2446868
1793	8.3	2451360
1794	8.3	2461364
1795	8.31	2.48955e+06
1796	8.31	2504257
1797	8.32	2.53321e+06
1798	8.32	2.52677e+06
1799	8.33	2.52566e+06
1800	8.33	2.49706e+06
1801	8.34	2.4616e+06
1802	8.34	2.41752e+06
1803	8.35	2.38502e+06
1804	8.35	2373821
1805	8.35	2.35941e+06
1806	8.36	2.38581e+06
1807	8.36	2409004
1808	8.37	2.40815e+06
1809	8.37	2.39603e+06
1810	8.38	2.38239e+06
1811	8.38	2.35407e+06
1812	8.39	2.33333e+06
1813	8.39	2.32181e+06
1814	8.4	2311850
1815	8.4	2295463
1816	8.41	2270723
1817	8.41	2.24767e+06
1818	8.41	2231313
1819	8.42	2.20583e+06
1820	8.42	2.19569e+06
1821	8.43	2.19971e+06
1822	8.43	2.19566e+06
1823	8.44	2192259
1824	8.44	2.18123e+06
1825	8.45	2.17156e+06
1826	8.45	2120366
1827	8.46	2.10311e+06
1828	8.46	2.0958e+06
1829	8.47	2.10223e+06
1830	8.47	2.10762e+06
1831	8.48	2.12835e+06
1832	8.48	2.13672e+06
1833	8.48	2.14383e+06
1834	8.49	2.14794e+06
1835	8.49	2.15624e+06
1836	8.5	2157637
1837	8.5	2142310
1838	8.51	2.13044e+06
1839	8.51	2.11086e+06
1840	8.52	2.1055e+06
1841	8.52	2111143
1842	8.53	2.108e+06
1843	8.53	2.10892e+06
1844	8.54	2125110
1845	8.54	2.11185e+06
1846	8.54	2.10816e+06
1847	8.55	2.10987e+06
1848	8.55	2.10013e+06
1849	8.56	2.07615e+06
1850	8.56	2.09158e+06
1851	8.57	2.0977e+06
1852	8.57	2.11099e+06
1853	8.58	2.12561e+06
1854	8.58	2.13051e+06
1855	8.59	2.10131e+06
1856	8.59	2.07513e+06
1857	8.6	2.07679e+06
1858	8.6	2.06475e+06
1859	8.6	2069360
1860	8.61	2.08821e+06
1861	8.61	2.10805e+06
1862	8.62	2.10082e+06
1863	8.62	2.1146e+06
1864	8.63	2116404
1865	8.63	2.11881e+06
1866	8.64	2.12055e+06
1867	8.64	2.13094e+06
1868	8.65	2.15109e+06
1869	8.65	2.17369e+06
1870	8.66	2.1812e+06
1871	8.66	2.17981e+06
1872	8.66	2.1701e+06
1873	8.67	2.16355e+06
1874	8.67	2.15781e+06
1875	8.68	2.16306e+06
1876	8.68	2166612
1877	8.69	2.17204e+06
1878	8.69	2.15734e+06
1879	8.7	2.15991e+06
1880	8.7	2.14733e+06
1881	8.71	2153500
1882	8.71	2.13603e+06
1883	8.72	2.13954e+06
1884	8.72	2.13855e+06
1885	8.73	2.14703e+06
1886	8.73	2.15579e+06
1887	8.73	2.15828e+06
1888	8.74	2.15937e+06
1889	8.74	2147390
1890	8.75	2.1451e+06
1891	8.75	2.12658e+06
1892	8.76	2.12949e+06
1893	8.76	2119928
1894	8.77	2.12211e+06
1895	8.77	2.12125e+06
1896	8.78	2133368
1897	8.78	2.09681e+06
1898	8.79	2.08352e+06
1899	8.79	2.07804e+06
1900	8.79	2.06392e+06
1901	8.8	2.07802e+06
1902	8.8	2.10922e+06
1903	8.81	2.10739e+06
1904	8.81	2101575
1905	8.82	2.10964e+06
1906	8.82	2.08942e+06
1907	8.83	2.09432e+06
1908	8.83	2.0927e+06
1909	8.84	2.09022e+06
1910	8.84	2093527
1911	8.85	2.09305e+06
1912	8.85	2.0769e+06
1913	8.85	2.07198e+06
1914	8.86	2.07237e+06
1915	8.86	2066469
1916	8.87	2085263
1917	8.87	2.1032e+06
1918	8.88	2.10443e+06
1919	8.88	2.10903e+06
1920	8.89	2.11951e+06
1921	8.89	2102814
1922	8.9	2.09511e+06
1923	8.9	2.08749e+06
1924	8.91	2.08595e+06
1925	8.91	2.07641e+06
1926	8.91	2064552
1927	8.92	2.07084e+06
1928	8.92	2055585
1929	8.93	2.06651e+06
1930	8.93	2.08563e+06
1931	8.94	2.11245e+06
1932	8.94	2.1132e+06
1933	8.95	2109629
1934	8.95	2.08092e+06
1935	8.96	2.07987e+06
1936	8.96	2.07605e+06
1937	8.97	2.09596e+06
1938	8.97	2.1284e+06
1939	8.98	2.14598e+06
1940	8.98	2.14333e+06
1941	8.98	2.15242e+06
1942	8.99	2.13295e+06
1943	8.99	2.12925e+06
1944	9	2.12166e+06
1945	9	2106147
1946	9.01	2.08867e+06
1947	9.01	2.09231e+06
1948	9.02	2076825
1949	9.02	2.07914e+06
1950	9.03	2.10835e+06
1951	9.03	2122166
1952	9.04	2.10698e+06
1953	9.04	2.10604e+06
1954	9.04	2.0916e+06
1955	9.05	2.08387e+06
1956	9.05	2.08894e+06
1957	9.06	2.1022e+06
1958	9.06	2103676
1959	9.07	2099849
1960	9.07	2090723
1961	9.08	2.06825e+06
1962	9.08	2.05881e+06
1963	9.09	2.05509e+06
1964	9.09	2.06562e+06
1965	9.1	2.07457e+06
1966	9.1	2.09574e+06
1967	9.1	2.09006e+06
1968	9.11	2.08596e+06
1969	9.11	2.07117e+06
1970	9.12	2.07617e+06
1971	9.12	2.0832e+06
1972	9.13	2.09573e+06
1973	9.13	2.09244e+06
1974	9.14	2.11976e+06
1975	9.14	2.10838e+06
1976	9.15	2121532
1977	9.15	2.1338e+06
1978	9.16	2.14835e+06
1979	9.16	2140634
1980	9.16	2.17604e+06
1981	9.17	2.18867e+06
1982	9.17	2.16587e+06
1983	9.18	2.16695e+06
1984	9.18	2.17511e+06
1985	9.19	2.1702e+06
1986	9.19	2.19627e+06
1987	9.2	2.26696e+06
1988	9.2	2322617
1989	9.21	2.38744e+06
1990	9.21	2.4681e+06
1991	9.22	2.55033e+06
1992	9.22	2.63686e+06
1993	9.23	2.77923e+06
1994	9.23	2.93125e+06
1995	9.23	3.1228e+06
1996	9.24	3.3891e+06
1997	9.24	3.638e+06
[truncated: 2,327 more rows]
