# Supplementary material for: Electron transfer engineering of artificially designed cell factory for complete biosynthesis of natural products
Source: Research Square preprint supplement (doi:10.21203/rs.3.rs-4718218/v1), 2024-08-01
Supplement: Supplementary file 19 [file TICdata_Blank-r003.XLS.xls]

## Sheet: Sheet1
+ESI TIC Scan Frag=100.0V CF=0.000 DF=0.000 Blank-r003.d
Index	X	Y
0	0	2.52971e+06
1	0	2.20928e+06
2	0.01	2.26855e+06
3	0.01	2.20411e+06
4	0.02	2.21638e+06
5	0.02	2220019
6	0.03	2.23397e+06
7	0.03	2.24529e+06
8	0.04	2.25857e+06
9	0.04	2.25054e+06
10	0.05	2.25818e+06
11	0.05	2284993
12	0.06	2.31683e+06
13	0.06	2.33405e+06
14	0.06	2.35349e+06
15	0.07	2.32719e+06
16	0.07	2288450
17	0.08	2.25801e+06
18	0.08	2.21915e+06
19	0.09	2190793
20	0.09	2.19855e+06
21	0.1	2214351
22	0.1	2.22189e+06
23	0.11	2232178
24	0.11	2.24202e+06
25	0.12	2.25297e+06
26	0.12	2.2414e+06
27	0.12	2.22876e+06
28	0.13	2.23002e+06
29	0.13	2226019
30	0.14	2.24057e+06
31	0.14	2.26121e+06
32	0.15	2.26272e+06
33	0.15	2.26402e+06
34	0.16	2255897
35	0.16	2.22075e+06
36	0.17	2232677
37	0.17	2244914
38	0.18	2235917
39	0.18	2.24864e+06
40	0.19	2258143
41	0.19	2239751
42	0.19	2.25165e+06
43	0.2	2.26911e+06
44	0.2	2277332
45	0.21	2.30214e+06
46	0.21	2.32945e+06
47	0.22	2.32348e+06
48	0.22	2.29403e+06
49	0.23	2.25181e+06
50	0.23	2.21927e+06
51	0.24	2204109
52	0.24	2.20285e+06
53	0.25	2.23105e+06
54	0.25	2.25428e+06
55	0.25	2.255e+06
56	0.26	2.25891e+06
57	0.26	2.30063e+06
58	0.27	2.30528e+06
59	0.27	2.27718e+06
60	0.28	2257741
61	0.28	2.2276e+06
62	0.29	2.19291e+06
63	0.29	2189683
64	0.3	2.21093e+06
65	0.3	2.22865e+06
66	0.31	2.23119e+06
67	0.31	2.23456e+06
68	0.31	2.24489e+06
69	0.32	2234071
70	0.32	2214765
71	0.33	2205226
72	0.33	2.20266e+06
73	0.34	2195728
74	0.34	2.21766e+06
75	0.35	2223612
76	0.35	2.23229e+06
77	0.36	2.21763e+06
78	0.36	2.19614e+06
79	0.37	2.20297e+06
80	0.37	2217268
81	0.37	2238353
82	0.38	2.27195e+06
83	0.38	2.28234e+06
84	0.39	2281436
85	0.39	2273727
86	0.4	2.26434e+06
87	0.4	2.25506e+06
88	0.41	2.26166e+06
89	0.41	2.24027e+06
90	0.42	2249038
91	0.42	2.24373e+06
92	0.43	2.24148e+06
93	0.43	2.24078e+06
94	0.44	2232953
95	0.44	2213158
96	0.44	2.21049e+06
97	0.45	2.22291e+06
98	0.45	2.22893e+06
99	0.46	2.2434e+06
100	0.46	2.27749e+06
101	0.47	2287159
102	0.47	2.2897e+06
103	0.48	2.28982e+06
104	0.48	2264188
105	0.49	2.22511e+06
106	0.49	2200420
107	0.5	2.19101e+06
108	0.5	2.20535e+06
109	0.5	2.23046e+06
110	0.51	2235705
111	0.51	2.25643e+06
112	0.52	2.24287e+06
113	0.52	2.24425e+06
114	0.53	2264979
115	0.53	2.2637e+06
116	0.54	2.23176e+06
117	0.54	2.23554e+06
118	0.55	2.20519e+06
119	0.55	2182160
120	0.56	2.1858e+06
121	0.56	2.20153e+06
122	0.56	2188973
123	0.57	2.21351e+06
124	0.57	2.22069e+06
125	0.58	2.23321e+06
126	0.58	2239563
127	0.59	2.25015e+06
128	0.59	2.24216e+06
129	0.6	2.23843e+06
130	0.6	2.22931e+06
131	0.61	2.22462e+06
132	0.61	2225047
133	0.62	2.24342e+06
134	0.62	2.26565e+06
135	0.62	2.2881e+06
136	0.63	2.26519e+06
137	0.63	2239618
138	0.64	2.22812e+06
139	0.64	2.20477e+06
140	0.65	2204810
141	0.65	2.22064e+06
142	0.66	2.22827e+06
143	0.66	2.21189e+06
144	0.67	2.20571e+06
145	0.67	2179354
146	0.68	2185152
147	0.68	2.1809e+06
148	0.69	2.17814e+06
149	0.69	2.18042e+06
150	0.69	2.20291e+06
151	0.7	2.2172e+06
152	0.7	2257736
153	0.71	2.27296e+06
154	0.71	2.27656e+06
155	0.72	2.2621e+06
156	0.72	2.25374e+06
157	0.73	2231120
158	0.73	2.21996e+06
159	0.74	2.22036e+06
160	0.74	2.21153e+06
161	0.75	2.2053e+06
162	0.75	2.19068e+06
163	0.75	2198779
164	0.76	2186590
165	0.76	2188636
166	0.77	2.17174e+06
167	0.77	2.17713e+06
168	0.78	2187092
169	0.78	2.19274e+06
170	0.79	2.19102e+06
171	0.79	2209835
172	0.8	2224145
173	0.8	2217851
174	0.81	2.22286e+06
175	0.81	2.23033e+06
176	0.81	2228383
177	0.82	2.24826e+06
178	0.82	2.26446e+06
179	0.83	2.27492e+06
180	0.83	2.27654e+06
181	0.84	2.26284e+06
182	0.84	2.22342e+06
183	0.85	2208578
184	0.85	2.21594e+06
185	0.86	2.21752e+06
186	0.86	2.23029e+06
187	0.87	2.23651e+06
188	0.87	2251136
189	0.87	2.23889e+06
190	0.88	2.22945e+06
191	0.88	2220917
192	0.89	2.22084e+06
193	0.89	2.20732e+06
194	0.9	2.19348e+06
195	0.9	2.20973e+06
196	0.91	2.20154e+06
197	0.91	2.1963e+06
198	0.92	2.17772e+06
199	0.92	2.18362e+06
200	0.93	2.16856e+06
201	0.93	2.1825e+06
202	0.93	2.19154e+06
203	0.94	2220062
204	0.94	2.23352e+06
205	0.95	2.24043e+06
206	0.95	2.22592e+06
207	0.96	2.21588e+06
208	0.96	2.20523e+06
209	0.97	2.20866e+06
210	0.97	2.21959e+06
211	0.98	2.24312e+06
212	0.98	2.24555e+06
213	0.99	2.22897e+06
214	0.99	2.2227e+06
215	1	2.22597e+06
216	1	2.22283e+06
217	1	2227312
218	1.01	2223753
219	1.01	2.20604e+06
220	1.02	2.20439e+06
221	1.02	2.21747e+06
222	1.03	2.22623e+06
223	1.03	2.23254e+06
224	1.04	2233880
225	1.04	2.21894e+06
226	1.05	2200946
227	1.05	2.19317e+06
228	1.06	2.19767e+06
229	1.06	2.18818e+06
230	1.06	2171005
231	1.07	2.17698e+06
232	1.07	2173144
233	1.08	2.19044e+06
234	1.08	2.21106e+06
235	1.09	2236991
236	1.09	2.24706e+06
237	1.1	2.29292e+06
238	1.1	2.27862e+06
239	1.11	2.27934e+06
240	1.11	2.26366e+06
241	1.12	2.2531e+06
242	1.12	2198534
243	1.12	2.20223e+06
244	1.13	2.18713e+06
245	1.13	2.1861e+06
246	1.14	2.18086e+06
247	1.14	2.21429e+06
248	1.15	2.22115e+06
249	1.15	2235868
250	1.16	2.25058e+06
251	1.16	2262749
252	1.17	2.26597e+06
253	1.17	2.27931e+06
254	1.18	2.27773e+06
255	1.18	2.26818e+06
256	1.18	2253543
257	1.19	2.23409e+06
258	1.19	2.23129e+06
259	1.2	2.23781e+06
260	1.2	2.24328e+06
261	1.21	2243952
262	1.21	2254797
263	1.22	2251160
264	1.22	2.25816e+06
265	1.23	2.25199e+06
266	1.23	2.2291e+06
267	1.24	2.21224e+06
268	1.24	2.2018e+06
269	1.25	2.22222e+06
270	1.25	2.22471e+06
271	1.25	2.24406e+06
272	1.26	2.24272e+06
273	1.26	2245373
274	1.27	2.21644e+06
275	1.27	2.23484e+06
276	1.28	2236535
277	1.28	2.23696e+06
278	1.29	2.21981e+06
279	1.29	2231446
280	1.3	2.23828e+06
281	1.3	2.22992e+06
282	1.31	2205178
283	1.31	2.19255e+06
284	1.31	2176267
285	1.32	2180748
286	1.32	2170441
287	1.33	2201361
288	1.33	2.22906e+06
289	1.34	2.23788e+06
290	1.34	2.23756e+06
291	1.35	2.26422e+06
292	1.35	2256151
293	1.36	2258577
294	1.36	2.24859e+06
295	1.37	2.23207e+06
296	1.37	2.24289e+06
297	1.37	2251869
298	1.38	2.24675e+06
299	1.38	2.27686e+06
300	1.39	2.29988e+06
301	1.39	2.30777e+06
302	1.4	2.29774e+06
303	1.4	2.28917e+06
304	1.41	2.24896e+06
305	1.41	2.22129e+06
306	1.42	2.19956e+06
307	1.42	2.18885e+06
308	1.43	2.17803e+06
309	1.43	2185394
310	1.43	2.18448e+06
311	1.44	2.18522e+06
312	1.44	2.19969e+06
313	1.45	2.22101e+06
314	1.45	2.22033e+06
315	1.46	2.22545e+06
316	1.46	2226031
317	1.47	2218975
318	1.47	2212591
319	1.48	2209970
320	1.48	2.19929e+06
321	1.49	2208007
322	1.49	2.21303e+06
323	1.5	2.22166e+06
324	1.5	2.22788e+06
325	1.5	2.23581e+06
326	1.51	2.23103e+06
327	1.51	2235950
328	1.52	2252181
329	1.52	2.25734e+06
330	1.53	2.24303e+06
331	1.53	2.21148e+06
332	1.54	2.19941e+06
333	1.54	2177585
334	1.55	2188882
335	1.55	2.19724e+06
336	1.56	2.23437e+06
337	1.56	2.24287e+06
338	1.56	2.24343e+06
339	1.57	2.2332e+06
340	1.57	2.23432e+06
341	1.58	2.20861e+06
342	1.58	2.20177e+06
343	1.59	2.21034e+06
344	1.59	2.2093e+06
345	1.6	2.20786e+06
346	1.6	2.18766e+06
347	1.61	2165170
348	1.61	2.14929e+06
349	1.62	2158474
350	1.62	2.16867e+06
351	1.62	2.18741e+06
352	1.63	2.19928e+06
353	1.63	2.17673e+06
354	1.64	2.15657e+06
355	1.64	2139993
356	1.65	2144657
357	1.65	2146826
358	1.66	2.19059e+06
359	1.66	2216224
360	1.67	2.2471e+06
361	1.67	2.23913e+06
362	1.68	2.23742e+06
363	1.68	2.23229e+06
364	1.68	2.22809e+06
365	1.69	2.21879e+06
366	1.69	2240317
367	1.7	2242966
368	1.7	2.24225e+06
369	1.71	2.24893e+06
370	1.71	2261423
371	1.72	2.26289e+06
372	1.72	2.27419e+06
373	1.73	2268584
374	1.73	2.27315e+06
375	1.74	2.26869e+06
376	1.74	2.26361e+06
377	1.75	2.25091e+06
378	1.75	2248708
379	1.75	2.23403e+06
380	1.76	2227431
381	1.76	2243433
382	1.77	2256674
383	1.77	2.24926e+06
384	1.78	2.25626e+06
385	1.78	2254539
386	1.79	2.23788e+06
387	1.79	2.23664e+06
388	1.8	2.23949e+06
389	1.8	2233758
390	1.81	2.22884e+06
391	1.81	2216775
392	1.81	2231849
393	1.82	2.23585e+06
394	1.82	2.23727e+06
395	1.83	2.24852e+06
396	1.83	2.26132e+06
397	1.84	2.23778e+06
398	1.84	2239847
399	1.85	2.24759e+06
400	1.85	2.23871e+06
401	1.86	2.23584e+06
402	1.86	2.25484e+06
403	1.87	2.2497e+06
404	1.87	2237702
405	1.87	2.2347e+06
406	1.88	2.21741e+06
407	1.88	2.2109e+06
408	1.89	2.21663e+06
409	1.89	2.21469e+06
410	1.9	2.21788e+06
411	1.9	2.22823e+06
412	1.91	2.21767e+06
413	1.91	2220173
414	1.92	2235560
415	1.92	2.21953e+06
416	1.93	2.23054e+06
417	1.93	2.25781e+06
418	1.93	2.26435e+06
419	1.94	2.25886e+06
420	1.94	2.26707e+06
421	1.95	2.24565e+06
422	1.95	2.22538e+06
423	1.96	2.22854e+06
424	1.96	2.23288e+06
425	1.97	2228928
426	1.97	2.24324e+06
427	1.98	2.23947e+06
428	1.98	2249241
429	1.99	2.24713e+06
430	1.99	2.25875e+06
431	1.99	2.24798e+06
432	2	2.25329e+06
433	2	2254159
434	2.01	2.27196e+06
435	2.01	2.27325e+06
436	2.02	2.25408e+06
437	2.02	2.24719e+06
438	2.03	2.23468e+06
439	2.03	2.23745e+06
440	2.04	2.24431e+06
441	2.04	2.26637e+06
442	2.05	2.26556e+06
443	2.05	2.26484e+06
444	2.06	2.24822e+06
445	2.06	2.25763e+06
446	2.06	2257007
447	2.07	2237216
448	2.07	2.23399e+06
449	2.08	2226392
450	2.08	2.20517e+06
451	2.09	2.21275e+06
452	2.09	2.23808e+06
453	2.1	2.2465e+06
454	2.1	2253019
455	2.11	2.25664e+06
456	2.11	2.24004e+06
457	2.12	2.2394e+06
458	2.12	2.22813e+06
459	2.12	2217390
460	2.13	2.21198e+06
461	2.13	2222770
462	2.14	2.20703e+06
463	2.14	2.22937e+06
464	2.15	2252256
465	2.15	2.2471e+06
466	2.16	2247207
467	2.16	2261064
468	2.17	2.25912e+06
469	2.17	2257785
470	2.18	2277991
471	2.18	2265554
472	2.18	2.26933e+06
473	2.19	2.27467e+06
474	2.19	2.2662e+06
475	2.2	2.26665e+06
476	2.2	2.26508e+06
477	2.21	2.25388e+06
478	2.21	2.2586e+06
479	2.22	2.27725e+06
480	2.22	2.26184e+06
481	2.23	2.26771e+06
482	2.23	2.2454e+06
483	2.24	2.24338e+06
484	2.24	2.25187e+06
485	2.24	2.27302e+06
486	2.25	2275641
487	2.25	2.28423e+06
488	2.26	2.26411e+06
489	2.26	2.23855e+06
490	2.27	2245901
491	2.27	2.2398e+06
492	2.28	2.23075e+06
493	2.28	2234439
494	2.29	2.25265e+06
495	2.29	2.24455e+06
496	2.3	2.24882e+06
497	2.3	2.24829e+06
498	2.31	2.23152e+06
499	2.31	2.21949e+06
500	2.31	2.2159e+06
501	2.32	2.23746e+06
502	2.32	2.23884e+06
503	2.33	2.24258e+06
504	2.33	2.24633e+06
505	2.34	2228405
506	2.34	2202923
507	2.35	2.19149e+06
508	2.35	2179561
509	2.36	2172834
510	2.36	2.20335e+06
511	2.37	2219906
512	2.37	2.24778e+06
513	2.37	2.27213e+06
514	2.38	2.30341e+06
515	2.38	2.29555e+06
516	2.39	2.28697e+06
517	2.39	2.27585e+06
518	2.4	2.25702e+06
519	2.4	2.22953e+06
520	2.41	2.22722e+06
521	2.41	2.24998e+06
522	2.42	2.25334e+06
523	2.42	2.26109e+06
524	2.43	2.2537e+06
525	2.43	2.26168e+06
526	2.43	2.24707e+06
527	2.44	2.24673e+06
528	2.44	2.23586e+06
529	2.45	2.24713e+06
530	2.45	2.2388e+06
531	2.46	2.25652e+06
532	2.46	2260947
533	2.47	2.27042e+06
534	2.47	2.27367e+06
535	2.48	2290487
536	2.48	2279623
537	2.49	2.28811e+06
538	2.49	2.29111e+06
539	2.49	2.27345e+06
540	2.5	2.24767e+06
541	2.5	2.23945e+06
542	2.51	2.25009e+06
543	2.51	2.26752e+06
544	2.52	2.28395e+06
545	2.52	2.28577e+06
546	2.53	2.29549e+06
547	2.53	2291025
548	2.54	2.27484e+06
549	2.54	2275558
550	2.55	2.26988e+06
551	2.55	2.26446e+06
552	2.56	2262219
553	2.56	2.28319e+06
554	2.56	2.29531e+06
555	2.57	2.30351e+06
556	2.57	2.28375e+06
557	2.58	2.25865e+06
558	2.58	2.23008e+06
559	2.59	2.22473e+06
560	2.59	2220576
561	2.6	2241967
562	2.6	2.25543e+06
563	2.61	2.26033e+06
564	2.61	2.25792e+06
565	2.62	2.25342e+06
566	2.62	2.24167e+06
567	2.62	2.23836e+06
568	2.63	2.24509e+06
569	2.63	2232012
570	2.64	2.22112e+06
571	2.64	2.21692e+06
572	2.65	2.21675e+06
573	2.65	2.20346e+06
574	2.66	2.22074e+06
575	2.66	2.24558e+06
576	2.67	2.27169e+06
577	2.67	2.28021e+06
578	2.68	2277841
579	2.68	2.26504e+06
580	2.68	2262119
581	2.69	2.24594e+06
582	2.69	2.24217e+06
583	2.7	2246493
584	2.7	2261885
585	2.71	2267328
586	2.71	2285839
587	2.72	2.27888e+06
588	2.72	2.28094e+06
589	2.73	2.26979e+06
590	2.73	2.255e+06
591	2.74	2.25081e+06
592	2.74	2.24539e+06
593	2.74	2.22473e+06
594	2.75	2.20526e+06
595	2.75	2.22352e+06
596	2.76	2.20478e+06
597	2.76	2.21683e+06
598	2.77	2223956
599	2.77	2.24098e+06
600	2.78	2.23405e+06
601	2.78	2270830
602	2.79	2273408
603	2.79	2251540
604	2.8	2249774
605	2.8	2.25751e+06
606	2.8	2252229
607	2.81	2.26683e+06
608	2.81	2.27678e+06
609	2.82	2247455
610	2.82	2.2498e+06
611	2.83	2.23801e+06
612	2.83	2.21986e+06
613	2.84	2.23218e+06
614	2.84	2.23888e+06
615	2.85	2.25023e+06
616	2.85	2268061
617	2.86	2.27477e+06
618	2.86	2.27545e+06
619	2.87	2.29278e+06
620	2.87	2277713
621	2.87	2.28575e+06
622	2.88	2.28853e+06
623	2.88	2271090
624	2.89	2.25299e+06
625	2.89	2.24103e+06
626	2.9	2.24152e+06
627	2.9	2.24298e+06
628	2.91	2.25923e+06
629	2.91	2278688
630	2.92	2311678
631	2.92	2.32297e+06
632	2.93	2.33463e+06
633	2.93	2305110
634	2.93	2.29085e+06
635	2.94	2.26107e+06
636	2.94	2.25415e+06
637	2.95	2.22898e+06
638	2.95	2.26581e+06
639	2.96	2277810
640	2.96	2300588
641	2.97	2310435
642	2.97	2.33493e+06
643	2.98	2309384
644	2.98	2301140
645	2.99	2292692
646	2.99	2274163
647	2.99	2263479
648	3	2.26167e+06
649	3	2.25147e+06
650	3.01	2.23942e+06
651	3.01	2.23813e+06
652	3.02	2.24679e+06
653	3.02	2.23055e+06
654	3.03	2.24143e+06
655	3.03	2.25258e+06
656	3.04	2267195
657	3.04	2.26146e+06
658	3.05	2.28054e+06
659	3.05	2.27856e+06
660	3.05	2.24927e+06
661	3.06	2245989
662	3.06	2.23847e+06
663	3.07	2.23326e+06
664	3.07	2.25418e+06
665	3.08	2294940
666	3.08	2.29571e+06
667	3.09	2.30407e+06
668	3.09	2.31836e+06
669	3.1	2.29707e+06
670	3.1	2.28431e+06
671	3.11	2275644
672	3.11	2.28523e+06
673	3.12	2.27191e+06
674	3.12	2.27645e+06
675	3.12	2.2717e+06
676	3.13	2.27263e+06
677	3.13	2.26557e+06
678	3.14	2264008
679	3.14	2.27272e+06
680	3.15	2.27876e+06
681	3.15	2271771
682	3.16	2275032
683	3.16	2.28835e+06
684	3.17	2.2919e+06
685	3.17	2.29634e+06
686	3.18	2315663
687	3.18	2.3103e+06
688	3.18	2.30805e+06
689	3.19	2.30555e+06
690	3.19	2309543
691	3.2	2.29415e+06
692	3.2	2296943
693	3.21	2.28581e+06
694	3.21	2.26053e+06
695	3.22	2.24582e+06
696	3.22	2.23567e+06
697	3.23	2233646
698	3.23	2.25094e+06
699	3.24	2.29077e+06
700	3.24	2.29688e+06
701	3.24	2.30716e+06
702	3.25	2290160
703	3.25	2.25732e+06
704	3.26	2.22414e+06
705	3.26	2.23599e+06
706	3.27	2.221e+06
707	3.27	2240353
708	3.28	2.23699e+06
709	3.28	2.24917e+06
710	3.29	2227179
711	3.29	2.24405e+06
712	3.3	2.2516e+06
713	3.3	2.27134e+06
714	3.3	2.28169e+06
715	3.31	2.29898e+06
716	3.31	2.28734e+06
717	3.32	2287907
718	3.32	2.28986e+06
719	3.33	2.2686e+06
720	3.33	2.24657e+06
721	3.34	2.2411e+06
722	3.34	2.23451e+06
723	3.35	2.23678e+06
724	3.35	2.2376e+06
725	3.36	2245861
726	3.36	2.24775e+06
727	3.37	2.24315e+06
728	3.37	2.24577e+06
729	3.37	2.27467e+06
730	3.38	2.25642e+06
731	3.38	2.25718e+06
732	3.39	2.25902e+06
733	3.39	2.26737e+06
734	3.4	2.26328e+06
735	3.4	2.3069e+06
736	3.41	2.30131e+06
737	3.41	2297453
738	3.42	2.27972e+06
739	3.42	2276317
740	3.43	2.25607e+06
741	3.43	2.257e+06
742	3.43	2.26776e+06
743	3.44	2.27331e+06
744	3.44	2291494
745	3.45	2315461
746	3.45	2324722
747	3.46	2318692
748	3.46	2.31214e+06
749	3.47	2274635
750	3.47	2.24252e+06
751	3.48	2225485
752	3.48	2212271
753	3.49	2.21258e+06
754	3.49	2.21615e+06
755	3.49	2.22849e+06
756	3.5	2247314
757	3.5	2.25663e+06
758	3.51	2267693
759	3.51	2.26273e+06
760	3.52	2.25763e+06
761	3.52	2.25125e+06
762	3.53	2.25641e+06
763	3.53	2.27214e+06
764	3.54	2293374
765	3.54	2.28581e+06
766	3.55	2.27856e+06
767	3.55	2285905
768	3.55	2.28154e+06
769	3.56	2.27856e+06
770	3.56	2.26779e+06
771	3.57	2.24055e+06
772	3.57	2.2165e+06
773	3.58	2.23214e+06
774	3.58	2251777
775	3.59	2.28461e+06
776	3.59	2.32273e+06
777	3.6	2.32386e+06
778	3.6	2.30721e+06
779	3.61	2.29862e+06
780	3.61	2.30251e+06
781	3.62	2296771
782	3.62	2.29106e+06
783	3.62	2.28299e+06
784	3.63	2.28475e+06
785	3.63	2288620
786	3.64	2.29146e+06
787	3.64	2.31729e+06
788	3.65	2320640
789	3.65	2.33114e+06
790	3.66	2.32748e+06
791	3.66	2.34025e+06
792	3.67	2343422
793	3.67	2346806
794	3.68	2.32575e+06
795	3.68	2.3037e+06
796	3.68	2.2877e+06
797	3.69	2281866
798	3.69	2.28329e+06
799	3.7	2.27783e+06
800	3.7	2.27588e+06
801	3.71	2.25881e+06
802	3.71	2.25448e+06
803	3.72	2.25186e+06
804	3.72	2262336
805	3.73	2.25328e+06
806	3.73	2261531
807	3.74	2.25856e+06
808	3.74	2.27438e+06
809	3.74	2273423
810	3.75	2288524
811	3.75	2.27916e+06
812	3.76	2.28228e+06
813	3.76	2.28889e+06
814	3.77	2.29079e+06
815	3.77	2.28887e+06
816	3.78	2.28013e+06
817	3.78	2274569
818	3.79	2.28152e+06
819	3.79	2289077
820	3.8	2286898
821	3.8	2.2795e+06
822	3.8	2266201
823	3.81	2.25228e+06
824	3.81	2.26539e+06
825	3.82	2.2734e+06
826	3.82	2.28451e+06
827	3.83	2.27216e+06
828	3.83	2.28392e+06
829	3.84	2.28668e+06
830	3.84	2.2779e+06
831	3.85	2256711
832	3.85	2254440
833	3.86	2.23635e+06
834	3.86	2221808
835	3.86	2236204
836	3.87	2.27283e+06
837	3.87	2.26905e+06
838	3.88	2263542
839	3.88	2247570
840	3.89	2.23636e+06
841	3.89	2.22124e+06
842	3.9	2.22666e+06
843	3.9	2.22433e+06
844	3.91	2.25704e+06
845	3.91	2.25527e+06
846	3.92	2.26467e+06
847	3.92	2.29354e+06
848	3.93	2.29261e+06
849	3.93	2.28382e+06
850	3.93	2.30057e+06
851	3.94	2.30777e+06
852	3.94	2.30802e+06
853	3.95	2.32302e+06
854	3.95	2.30715e+06
855	3.96	2272345
856	3.96	2.25175e+06
857	3.97	2.23304e+06
858	3.97	2.2254e+06
859	3.98	2.25026e+06
860	3.98	2.26872e+06
861	3.99	2283202
862	3.99	2.29811e+06
863	3.99	2.30755e+06
864	4	2.27612e+06
865	4	2.25486e+06
866	4.01	2260218
867	4.01	2.25337e+06
868	4.02	2.25882e+06
869	4.02	2274654
870	4.03	2.28795e+06
871	4.03	2.26074e+06
872	4.04	2.26741e+06
873	4.04	2.28379e+06
874	4.05	2.29588e+06
875	4.05	2.29729e+06
876	4.05	2.30227e+06
877	4.06	2290100
878	4.06	2.28013e+06
879	4.07	2291243
880	4.07	2.30213e+06
881	4.08	2.3015e+06
882	4.08	2.28769e+06
883	4.09	2273486
884	4.09	2265784
885	4.1	2273716
886	4.1	2294963
887	4.11	2.30396e+06
888	4.11	2.27798e+06
889	4.11	2.2625e+06
890	4.12	2.27002e+06
891	4.12	2.2807e+06
892	4.13	2.30142e+06
893	4.13	2.31446e+06
894	4.14	2.30654e+06
895	4.14	2.27984e+06
896	4.15	2279115
897	4.15	2.28814e+06
898	4.16	2.3069e+06
899	4.16	2312958
900	4.17	2.31929e+06
901	4.17	2295356
902	4.18	2.28909e+06
903	4.18	2.26935e+06
904	4.18	2.27111e+06
905	4.19	2.24465e+06
906	4.19	2.25064e+06
907	4.2	2.26213e+06
908	4.2	2277629
909	4.21	2282551
910	4.21	2.30772e+06
911	4.22	2.31168e+06
912	4.22	2.29462e+06
913	4.23	2296869
914	4.23	2.31238e+06
915	4.24	2.30748e+06
916	4.24	2293802
917	4.24	2277126
918	4.25	2.24037e+06
919	4.25	2200634
920	4.26	2198092
921	4.26	2210338
922	4.27	2.23922e+06
923	4.27	2.26971e+06
924	4.28	2.29329e+06
925	4.28	2.29526e+06
926	4.29	2.29369e+06
927	4.29	2.29403e+06
928	4.3	2300833
929	4.3	2274886
930	4.3	2.27617e+06
931	4.31	2.26706e+06
932	4.31	2266790
933	4.32	2.26871e+06
934	4.32	2283305
935	4.33	2.25758e+06
936	4.33	2.25528e+06
937	4.34	2243835
938	4.34	2.24376e+06
939	4.35	2245397
940	4.35	2.27614e+06
941	4.36	2267913
942	4.36	2.26526e+06
943	4.36	2.24664e+06
944	4.37	2.25138e+06
945	4.37	2.23027e+06
946	4.38	2237209
947	4.38	2.24075e+06
948	4.39	2.25852e+06
949	4.39	2.2479e+06
950	4.4	2.26076e+06
951	4.4	2.27588e+06
952	4.41	2.29525e+06
953	4.41	2.29316e+06
954	4.42	2.2999e+06
955	4.42	2.30412e+06
956	4.43	2297643
957	4.43	2297888
958	4.43	2.30099e+06
959	4.44	2.30493e+06
960	4.44	2.27721e+06
961	4.45	2.26873e+06
962	4.45	2.24747e+06
963	4.46	2.2321e+06
964	4.46	2.22988e+06
965	4.47	2.24054e+06
966	4.47	2.24469e+06
967	4.48	2.23558e+06
968	4.48	2.24332e+06
969	4.49	2251490
970	4.49	2.26961e+06
971	4.49	2.27377e+06
972	4.5	2.29897e+06
973	4.5	2.30217e+06
974	4.51	2.26849e+06
975	4.51	2.25325e+06
976	4.52	2.25053e+06
977	4.52	2.26818e+06
978	4.53	2.27845e+06
979	4.53	2.28931e+06
980	4.54	2.28419e+06
981	4.54	2.27366e+06
982	4.55	2.2588e+06
983	4.55	2.25615e+06
984	4.55	2.26451e+06
985	4.56	2.25617e+06
986	4.56	2.27484e+06
987	4.57	2.27734e+06
988	4.57	2287409
989	4.58	2.28573e+06
990	4.58	2297111
991	4.59	2.27995e+06
992	4.59	2.26535e+06
993	4.6	2.24187e+06
994	4.6	2.24611e+06
995	4.61	2.26189e+06
996	4.61	2.25614e+06
997	4.61	2.25806e+06
998	4.62	2283751
999	4.62	2.28847e+06
1000	4.63	2.28117e+06
1001	4.63	2300143
1002	4.64	2311818
1003	4.64	2.2981e+06
1004	4.65	2282619
1005	4.65	2274003
1006	4.66	2.27013e+06
1007	4.66	2.25417e+06
1008	4.67	2.24972e+06
1009	4.67	2.27294e+06
1010	4.67	2.29146e+06
1011	4.68	2.30148e+06
1012	4.68	2.31676e+06
1013	4.69	2334855
1014	4.69	2.32998e+06
1015	4.7	2.29637e+06
1016	4.7	2.28053e+06
1017	4.71	2.25711e+06
1018	4.71	2.258e+06
1019	4.72	2.2409e+06
1020	4.72	2271695
1021	4.73	2280750
1022	4.73	2.28895e+06
1023	4.74	2.25555e+06
1024	4.74	2.2499e+06
1025	4.74	2.24502e+06
1026	4.75	2.20937e+06
1027	4.75	2239703
1028	4.76	2252849
1029	4.76	2266210
1030	4.77	2.27295e+06
1031	4.77	2.28838e+06
1032	4.78	2.26073e+06
1033	4.78	2.26381e+06
1034	4.79	2.27876e+06
1035	4.79	2.27729e+06
1036	4.8	2.28534e+06
1037	4.8	2.28689e+06
1038	4.8	2297161
1039	4.81	2.28591e+06
1040	4.81	2.29377e+06
1041	4.82	2.31037e+06
1042	4.82	2.30167e+06
1043	4.83	2304547
1044	4.83	2303902
1045	4.84	2320563
1046	4.84	2.34029e+06
1047	4.85	2351594
1048	4.85	2.34665e+06
1049	4.86	2.33913e+06
1050	4.86	2306428
1051	4.86	2284328
1052	4.87	2.27138e+06
1053	4.87	2.27102e+06
1054	4.88	2.27356e+06
1055	4.88	2.24432e+06
1056	4.89	2221110
1057	4.89	2221210
1058	4.9	2.21579e+06
1059	4.9	2.22824e+06
1060	4.91	2259370
1061	4.91	2.25839e+06
1062	4.92	2.28464e+06
1063	4.92	2.2916e+06
1064	4.92	2.29875e+06
1065	4.93	2.30397e+06
1066	4.93	2.31192e+06
1067	4.94	2269703
1068	4.94	2.26093e+06
1069	4.95	2.25953e+06
1070	4.95	2.25972e+06
1071	4.96	2.27357e+06
1072	4.96	2.30592e+06
1073	4.97	2.31968e+06
1074	4.97	2310203
1075	4.98	2.29799e+06
1076	4.98	2.27072e+06
1077	4.99	2.24789e+06
1078	4.99	2268378
1079	4.99	2263419
1080	5	2.28182e+06
1081	5	2.30404e+06
1082	5.01	2.31525e+06
1083	5.01	2.28836e+06
1084	5.02	2.3122e+06
1085	5.02	2320446
1086	5.03	2322488
1087	5.03	2.30751e+06
1088	5.04	2308525
1089	5.04	2.29787e+06
1090	5.05	2289382
1091	5.05	2.26859e+06
1092	5.05	2.27982e+06
1093	5.06	2291459
1094	5.06	2.30432e+06
1095	5.07	2.30458e+06
1096	5.07	2.32298e+06
1097	5.08	2.29385e+06
1098	5.08	2.26655e+06
1099	5.09	2.23894e+06
1100	5.09	2.22157e+06
1101	5.1	2.22237e+06
1102	5.1	2.24361e+06
1103	5.11	2.27396e+06
1104	5.11	2309029
1105	5.11	2306862
1106	5.12	2.30071e+06
1107	5.12	2312496
1108	5.13	2288451
1109	5.13	2266595
1110	5.14	2.27773e+06
1111	5.14	2.27077e+06
1112	5.15	2.25045e+06
1113	5.15	2.25495e+06
1114	5.16	2279319
1115	5.16	2297032
1116	5.17	2.30846e+06
1117	5.17	2.308e+06
1118	5.17	2300332
1119	5.18	2280180
1120	5.18	2.27384e+06
1121	5.19	2.28316e+06
1122	5.19	2.28919e+06
1123	5.2	2.29128e+06
1124	5.2	2.2987e+06
1125	5.21	2.28543e+06
1126	5.21	2.27669e+06
1127	5.22	2288804
1128	5.22	2287427
1129	5.23	2.29095e+06
1130	5.23	2.31017e+06
1131	5.24	2.3168e+06
1132	5.24	2.29652e+06
1133	5.24	2.29161e+06
1134	5.25	2279785
1135	5.25	2.25466e+06
1136	5.26	2245858
1137	5.26	2.24397e+06
1138	5.27	2.2483e+06
1139	5.27	2231213
1140	5.28	2245042
1141	5.28	2.24741e+06
1142	5.29	2.25053e+06
1143	5.29	2229393
1144	5.3	2.23373e+06
1145	5.3	2.22758e+06
1146	5.3	2.21606e+06
1147	5.31	2.2268e+06
1148	5.31	2.23273e+06
1149	5.32	2.24429e+06
1150	5.32	2250822
1151	5.33	2.25653e+06
1152	5.33	2.25899e+06
1153	5.34	2.26263e+06
1154	5.34	2.24866e+06
1155	5.35	2.25975e+06
1156	5.35	2.2763e+06
1157	5.36	2274484
1158	5.36	2.27757e+06
1159	5.36	2.2723e+06
1160	5.37	2.25188e+06
1161	5.37	2.2587e+06
1162	5.38	2.24896e+06
1163	5.38	2.23913e+06
1164	5.39	2.22827e+06
1165	5.39	2.23227e+06
1166	5.4	2.23659e+06
1167	5.4	2273075
1168	5.41	2.29679e+06
1169	5.41	2.3287e+06
1170	5.42	2.30457e+06
1171	5.42	2289874
1172	5.42	2.28109e+06
1173	5.43	2.26652e+06
1174	5.43	2.24475e+06
1175	5.44	2.27696e+06
1176	5.44	2.28942e+06
1177	5.45	2290294
1178	5.45	2.29071e+06
1179	5.46	2.29887e+06
1180	5.46	2276472
1181	5.47	2.26093e+06
1182	5.47	2.23299e+06
1183	5.48	2.22292e+06
1184	5.48	2.19734e+06
1185	5.49	2204188
1186	5.49	2.20718e+06
1187	5.49	2.26419e+06
1188	5.5	2.27656e+06
1189	5.5	2.28747e+06
1190	5.51	2.28236e+06
1191	5.51	2.28431e+06
1192	5.52	2.25971e+06
1193	5.52	2.27251e+06
1194	5.53	2.27729e+06
1195	5.53	2.28055e+06
1196	5.54	2.27252e+06
1197	5.54	2287892
1198	5.55	2.28489e+06
1199	5.55	2277016
1200	5.55	2.27196e+06
1201	5.56	2.2768e+06
1202	5.56	2260353
1203	5.57	2.25176e+06
1204	5.57	2.26895e+06
1205	5.58	2.28671e+06
1206	5.58	2.2778e+06
1207	5.59	2.27323e+06
1208	5.59	2.29103e+06
1209	5.6	2283051
1210	5.6	2280124
1211	5.61	2.30404e+06
1212	5.61	2.30756e+06
1213	5.61	2292827
1214	5.62	2.2857e+06
1215	5.62	2.29471e+06
1216	5.63	2.29395e+06
1217	5.63	2299396
1218	5.64	2.30149e+06
1219	5.64	2.30478e+06
1220	5.65	2.30395e+06
1221	5.65	2308929
1222	5.66	2302131
1223	5.66	2285975
1224	5.67	2.27386e+06
1225	5.67	2.28205e+06
1226	5.67	2.2769e+06
1227	5.68	2.30084e+06
1228	5.68	2.31557e+06
1229	5.69	2.30926e+06
1230	5.69	2.28517e+06
1231	5.7	2.29344e+06
1232	5.7	2.26159e+06
1233	5.71	2.24546e+06
1234	5.71	2.2396e+06
1235	5.72	2221569
1236	5.72	2.21692e+06
1237	5.73	2.24277e+06
1238	5.73	2257862
1239	5.73	2.2704e+06
1240	5.74	2298246
1241	5.74	2.30422e+06
1242	5.75	2.29688e+06
1243	5.75	2273944
1244	5.76	2.26734e+06
1245	5.76	2261818
1246	5.77	2264032
1247	5.77	2269198
1248	5.78	2.29075e+06
1249	5.78	2.25799e+06
1250	5.79	2228194
1251	5.79	2.19864e+06
1252	5.8	2.18498e+06
1253	5.8	2.18091e+06
1254	5.8	2.19488e+06
1255	5.81	2.21687e+06
1256	5.81	2.25144e+06
1257	5.82	2.29181e+06
1258	5.82	2292824
1259	5.83	2.29814e+06
1260	5.83	2286145
1261	5.84	2.25538e+06
1262	5.84	2.23004e+06
1263	5.85	2.24378e+06
1264	5.85	2.25476e+06
1265	5.86	2273337
1266	5.86	2.30419e+06
1267	5.86	2.29991e+06
1268	5.87	2.30956e+06
1269	5.87	2.31235e+06
1270	5.88	2.29139e+06
1271	5.88	2277697
1272	5.89	2.28808e+06
1273	5.89	2265816
1274	5.9	2.2573e+06
1275	5.9	2.24988e+06
1276	5.91	2.24885e+06
1277	5.91	2.25075e+06
1278	5.92	2.26085e+06
1279	5.92	2.26239e+06
1280	5.92	2.26268e+06
1281	5.93	2.27947e+06
1282	5.93	2.29024e+06
1283	5.94	2.2844e+06
1284	5.94	2.28874e+06
1285	5.95	2.27303e+06
1286	5.95	2222277
1287	5.96	2.18583e+06
1288	5.96	2.18844e+06
1289	5.97	2.18174e+06
1290	5.97	2.20027e+06
1291	5.98	2217457
1292	5.98	2224342
1293	5.98	2226779
1294	5.99	2.23135e+06
1295	5.99	2.23974e+06
1296	6	2.23184e+06
1297	6	2249899
1298	6.01	2258396
1299	6.01	2.25135e+06
1300	6.02	2255055
1301	6.02	2.26148e+06
1302	6.03	2.23916e+06
1303	6.03	2.24626e+06
1304	6.04	2.25688e+06
1305	6.04	2.27444e+06
1306	6.05	2.28718e+06
1307	6.05	2.29426e+06
1308	6.05	2.27278e+06
1309	6.06	2.26615e+06
1310	6.06	2.23374e+06
1311	6.07	2.22955e+06
1312	6.07	2.22636e+06
1313	6.08	2.23542e+06
1314	6.08	2.23317e+06
1315	6.09	2235105
1316	6.09	2.22957e+06
1317	6.1	2.20816e+06
1318	6.1	2199690
1319	6.11	2209144
1320	6.11	2228249
1321	6.11	2245164
1322	6.12	2.29864e+06
1323	6.12	2.31899e+06
1324	6.13	2.33167e+06
1325	6.13	2.31956e+06
1326	6.14	2.31391e+06
1327	6.14	2.2964e+06
1328	6.15	2273832
1329	6.15	2.27811e+06
1330	6.16	2.29592e+06
1331	6.16	2277896
1332	6.17	2.26014e+06
1333	6.17	2.26444e+06
1334	6.17	2248062
1335	6.18	2.2298e+06
1336	6.18	2237581
1337	6.19	2.21972e+06
1338	6.19	2.21239e+06
1339	6.2	2.20726e+06
1340	6.2	2.23534e+06
1341	6.21	2.2651e+06
1342	6.21	2.29093e+06
1343	6.22	2312156
1344	6.22	2.31335e+06
1345	6.23	2272074
1346	6.23	2.26386e+06
1347	6.23	2.27561e+06
1348	6.24	2.26324e+06
1349	6.24	2251608
1350	6.25	2.25738e+06
1351	6.25	2.25449e+06
1352	6.26	2242992
1353	6.26	2.25837e+06
1354	6.27	2271156
1355	6.27	2.2733e+06
1356	6.28	2.26658e+06
1357	6.28	2.26574e+06
1358	6.29	2.2394e+06
1359	6.29	2233749
1360	6.3	2.22077e+06
1361	6.3	2.20038e+06
1362	6.3	2.21173e+06
1363	6.31	2.2324e+06
1364	6.31	2247604
1365	6.32	2.27913e+06
1366	6.32	2286007
1367	6.33	2.27348e+06
1368	6.33	2.2695e+06
1369	6.34	2.28405e+06
1370	6.34	2.29066e+06
1371	6.35	2.31543e+06
1372	6.35	2.31268e+06
1373	6.36	2.28436e+06
1374	6.36	2.23777e+06
1375	6.36	2.22079e+06
1376	6.37	2.23086e+06
1377	6.37	2.27519e+06
1378	6.38	2.3027e+06
1379	6.38	2.31985e+06
1380	6.39	2.31467e+06
1381	6.39	2288687
1382	6.4	2.23436e+06
1383	6.4	2.22864e+06
1384	6.41	2.22914e+06
1385	6.41	2.22885e+06
1386	6.42	2.23631e+06
1387	6.42	2.25128e+06
1388	6.42	2238792
1389	6.43	2.22623e+06
1390	6.43	2.22447e+06
1391	6.44	2221776
1392	6.44	2.21473e+06
1393	6.45	2.22414e+06
1394	6.45	2.23104e+06
1395	6.46	2.23117e+06
1396	6.46	2.25057e+06
1397	6.47	2.27345e+06
1398	6.47	2.26261e+06
1399	6.48	2.26033e+06
1400	6.48	2246579
1401	6.48	2.23118e+06
1402	6.49	2.23746e+06
1403	6.49	2.25142e+06
1404	6.5	2.25395e+06
1405	6.5	2263608
1406	6.51	2.27681e+06
1407	6.51	2286901
1408	6.52	2295461
1409	6.52	2.31593e+06
1410	6.53	2.30733e+06
1411	6.53	2.28172e+06
1412	6.54	2259884
1413	6.54	2.23636e+06
1414	6.54	2.22744e+06
1415	6.55	2.26822e+06
1416	6.55	2.28677e+06
1417	6.56	2.32156e+06
1418	6.56	2.33535e+06
1419	6.57	2.32759e+06
1420	6.57	2.30349e+06
1421	6.58	2293601
1422	6.58	2.26479e+06
1423	6.59	2277192
1424	6.59	2294735
1425	6.6	2.27356e+06
1426	6.6	2.24847e+06
1427	6.61	2229669
1428	6.61	2.20832e+06
1429	6.61	2.18777e+06
1430	6.62	2.21109e+06
1431	6.62	2.23792e+06
1432	6.63	2.24046e+06
1433	6.63	2.24871e+06
1434	6.64	2.24939e+06
1435	6.64	2.25371e+06
1436	6.65	2.26244e+06
1437	6.65	2.26834e+06
1438	6.66	2.2704e+06
1439	6.66	2.28116e+06
1440	6.67	2.26521e+06
1441	6.67	2.23966e+06
1442	6.67	2.25457e+06
1443	6.68	2.25055e+06
1444	6.68	2.25854e+06
1445	6.69	2.28276e+06
1446	6.69	2.31287e+06
1447	6.7	2.31404e+06
1448	6.7	2.29516e+06
1449	6.71	2.25771e+06
1450	6.71	2.22677e+06
1451	6.72	2.20627e+06
1452	6.72	2194872
1453	6.73	2227761
1454	6.73	2246878
1455	6.73	2276545
1456	6.74	2.27525e+06
1457	6.74	2.27571e+06
1458	6.75	2.26431e+06
1459	6.75	2.27888e+06
1460	6.76	2.25833e+06
1461	6.76	2253797
1462	6.77	2.24395e+06
1463	6.77	2.23564e+06
1464	6.78	2.23205e+06
1465	6.78	2231919
1466	6.79	2.24861e+06
1467	6.79	2.25263e+06
1468	6.79	2.25427e+06
1469	6.8	2.25124e+06
1470	6.8	2.26739e+06
1471	6.81	2268474
1472	6.81	2.26944e+06
1473	6.82	2.27845e+06
1474	6.82	2271707
1475	6.83	2270163
1476	6.83	2.26603e+06
1477	6.84	2266736
1478	6.84	2.24345e+06
1479	6.85	2.24188e+06
1480	6.85	2.23485e+06
1481	6.86	2.24071e+06
1482	6.86	2.25229e+06
1483	6.86	2.23317e+06
1484	6.87	2.21831e+06
1485	6.87	2.20277e+06
1486	6.88	2.19983e+06
1487	6.88	2.20359e+06
1488	6.89	2.24437e+06
1489	6.89	2.24632e+06
1490	6.9	2239473
1491	6.9	2.21435e+06
1492	6.91	2.22968e+06
1493	6.91	2241228
1494	6.92	2.24756e+06
1495	6.92	2275133
1496	6.92	2.27697e+06
1497	6.93	2.26688e+06
1498	6.93	2.25502e+06
1499	6.94	2.24745e+06
1500	6.94	2.21339e+06
1501	6.95	2.20395e+06
1502	6.95	2.20094e+06
1503	6.96	2.21524e+06
1504	6.96	2.23596e+06
1505	6.97	2.25201e+06
1506	6.97	2241990
1507	6.98	2221119
1508	6.98	2203885
1509	6.98	2196564
1510	6.99	2182597
1511	6.99	2220636
1512	7	2.23378e+06
1513	7	2.2339e+06
1514	7.01	2.22849e+06
1515	7.01	2.24952e+06
1516	7.02	2.23665e+06
1517	7.02	2.24571e+06
1518	7.03	2.27901e+06
1519	7.03	2.28448e+06
1520	7.04	2.28364e+06
1521	7.04	2273588
1522	7.04	2.27568e+06
1523	7.05	2266169
1524	7.05	2.26989e+06
1525	7.06	2.2575e+06
1526	7.06	2.24141e+06
1527	7.07	2.22657e+06
1528	7.07	2.22577e+06
1529	7.08	2214583
1530	7.08	2211103
1531	7.09	2.21593e+06
1532	7.09	2.20779e+06
1533	7.1	2195196
1534	7.1	2.19138e+06
1535	7.11	2.19976e+06
1536	7.11	2.21102e+06
1537	7.11	2.22499e+06
1538	7.12	2.2418e+06
1539	7.12	2269388
1540	7.13	2269120
1541	7.13	2280573
1542	7.14	2.2834e+06
1543	7.14	2.27562e+06
1544	7.15	2265687
1545	7.15	2265613
1546	7.16	2.26305e+06
1547	7.16	2272208
1548	7.17	2.29047e+06
1549	7.17	2283418
1550	7.17	2.27195e+06
1551	7.18	2.24902e+06
1552	7.18	2.22975e+06
1553	7.19	2226307
1554	7.19	2.23114e+06
1555	7.2	2.24776e+06
1556	7.2	2261992
1557	7.21	2.26294e+06
1558	7.21	2.26577e+06
1559	7.22	2.26795e+06
1560	7.22	2231174
1561	7.23	2222169
1562	7.23	2.21399e+06
1563	7.23	2.19609e+06
1564	7.24	2.21824e+06
1565	7.24	2243108
1566	7.25	2.26561e+06
1567	7.25	2.28057e+06
1568	7.26	2280163
1569	7.26	2268246
1570	7.27	2249314
1571	7.27	2.23671e+06
1572	7.28	2215323
1573	7.28	2.21822e+06
1574	7.29	2.19607e+06
1575	7.29	2.20926e+06
1576	7.29	2.20185e+06
1577	7.3	2.22575e+06
1578	7.3	2.241e+06
1579	7.31	2.26299e+06
1580	7.31	2.26733e+06
1581	7.32	2.26753e+06
1582	7.32	2.24445e+06
1583	7.33	2.22836e+06
1584	7.33	2.23591e+06
1585	7.34	2.23042e+06
1586	7.34	2.22682e+06
1587	7.35	2.23583e+06
1588	7.35	2.24717e+06
1589	7.36	2234998
1590	7.36	2.24712e+06
1591	7.36	2.23579e+06
1592	7.37	2.22497e+06
1593	7.37	2195439
1594	7.38	2.19514e+06
1595	7.38	2.18483e+06
1596	7.39	2.20532e+06
1597	7.39	2.2275e+06
1598	7.4	2.24109e+06
1599	7.4	2.23196e+06
1600	7.41	2.23424e+06
1601	7.41	2.23803e+06
1602	7.42	2.23859e+06
1603	7.42	2258503
1604	7.42	2.24442e+06
1605	7.43	2.21787e+06
1606	7.43	2.1896e+06
1607	7.44	2.19586e+06
1608	7.44	2181352
1609	7.45	2.20261e+06
1610	7.45	2.22452e+06
1611	7.46	2.224e+06
1612	7.46	2.21446e+06
1613	7.47	2218123
1614	7.47	2204129
1615	7.48	2.18972e+06
1616	7.48	2.18055e+06
1617	7.48	2175912
1618	7.49	2.17961e+06
1619	7.49	2204276
1620	7.5	2213755
1621	7.5	2.22211e+06
1622	7.51	2.21654e+06
1623	7.51	2.23e+06
1624	7.52	2.22755e+06
1625	7.52	2.22467e+06
1626	7.53	2.23307e+06
1627	7.53	2229265
1628	7.54	2.21768e+06
1629	7.54	2209467
1630	7.54	2200738
1631	7.55	2.18912e+06
1632	7.55	2.19608e+06
1633	7.56	2.18716e+06
1634	7.56	2.19036e+06
1635	7.57	2216263
1636	7.57	2.22348e+06
1637	7.58	2.22721e+06
1638	7.58	2.25913e+06
1639	7.59	2.26988e+06
1640	7.59	2.26271e+06
1641	7.6	2.26392e+06
1642	7.6	2.26042e+06
1643	7.6	2.2313e+06
1644	7.61	2.20848e+06
1645	7.61	2.21165e+06
1646	7.62	2.20878e+06
1647	7.62	2216167
1648	7.63	2211442
1649	7.63	2.23331e+06
1650	7.64	2.23278e+06
1651	7.64	2.25374e+06
1652	7.65	2.24476e+06
1653	7.65	2.26824e+06
1654	7.66	2.23655e+06
1655	7.66	2.23508e+06
1656	7.67	2227491
1657	7.67	2.24028e+06
1658	7.67	2.22805e+06
1659	7.68	2.2353e+06
1660	7.68	2204470
1661	7.69	2.18265e+06
1662	7.69	2.16543e+06
1663	7.7	2.16147e+06
1664	7.7	2.16974e+06
1665	7.71	2167642
1666	7.71	2165363
1667	7.72	2.17812e+06
1668	7.72	2.17278e+06
1669	7.73	2.15903e+06
1670	7.73	2188109
1671	7.73	2199205
1672	7.74	2.1887e+06
1673	7.74	2.18656e+06
1674	7.75	2.18967e+06
1675	7.75	2.17367e+06
1676	7.76	2178607
1677	7.76	2.17859e+06
1678	7.77	2.1987e+06
1679	7.77	2.21139e+06
1680	7.78	2242615
1681	7.78	2243926
1682	7.79	2.26064e+06
1683	7.79	2.24585e+06
1684	7.79	2245307
1685	7.8	2.2201e+06
1686	7.8	2.22463e+06
1687	7.81	2.22792e+06
1688	7.81	2.23288e+06
1689	7.82	2.23724e+06
1690	7.82	2.23295e+06
1691	7.83	2.23282e+06
1692	7.83	2.23084e+06
1693	7.84	2236878
1694	7.84	2.22317e+06
1695	7.85	2.22157e+06
1696	7.85	2.2164e+06
1697	7.85	2.21491e+06
1698	7.86	2.19678e+06
1699	7.86	2.17747e+06
1700	7.87	2.18008e+06
1701	7.87	2180769
1702	7.88	2.16327e+06
1703	7.88	2179177
1704	7.89	2.19741e+06
1705	7.89	2178054
1706	7.9	2.17454e+06
1707	7.9	2.17964e+06
1708	7.91	2.17941e+06
1709	7.91	2.17708e+06
1710	7.92	2.17282e+06
1711	7.92	2.16117e+06
1712	7.92	2.17176e+06
1713	7.93	2.18469e+06
1714	7.93	2.20586e+06
1715	7.94	2.23217e+06
1716	7.94	2249239
1717	7.95	2.25704e+06
1718	7.95	2259728
1719	7.96	2.25687e+06
1720	7.96	2.26271e+06
1721	7.97	2238711
1722	7.97	2.22567e+06
1723	7.98	2188465
1724	7.98	2190507
1725	7.98	2.18482e+06
1726	7.99	2.18616e+06
1727	7.99	2.16797e+06
1728	8	2.17396e+06
1729	8	2.1463e+06
1730	8.01	2.13851e+06
1731	8.01	2134965
1732	8.02	2156467
1733	8.02	2.17906e+06
1734	8.03	2194013
1735	8.03	2.18691e+06
1736	8.04	2.18685e+06
1737	8.04	2.17778e+06
1738	8.04	2.1783e+06
1739	8.05	2184849
1740	8.05	2.20158e+06
1741	8.06	2208713
1742	8.06	2.20991e+06
1743	8.07	2.21672e+06
1744	8.07	2.21516e+06
1745	8.08	2.20773e+06
1746	8.08	2.21188e+06
1747	8.09	2.2203e+06
1748	8.09	2213235
1749	8.1	2.22398e+06
1750	8.1	2222321
1751	8.1	2.19646e+06
1752	8.11	2.18533e+06
1753	8.11	2169244
1754	8.12	2.15928e+06
1755	8.12	2173823
1756	8.13	2185741
1757	8.13	2179711
1758	8.14	2.20736e+06
1759	8.14	2.21196e+06
1760	8.15	2.18028e+06
1761	8.15	2.17062e+06
1762	8.16	2.15495e+06
1763	8.16	2.14556e+06
1764	8.17	2.14667e+06
1765	8.17	2161662
1766	8.17	2.16525e+06
1767	8.18	2.16751e+06
1768	8.18	2.15499e+06
1769	8.19	2.15512e+06
1770	8.19	2156446
1771	8.2	2141702
1772	8.2	2.17535e+06
1773	8.21	2181536
1774	8.21	2.18708e+06
1775	8.22	2.19409e+06
1776	8.22	2.19127e+06
1777	8.23	2.1717e+06
1778	8.23	2.16391e+06
1779	8.23	2123800
1780	8.24	2.11632e+06
1781	8.24	2.11273e+06
1782	8.25	2.12374e+06
1783	8.25	2.157e+06
1784	8.26	2.2032e+06
1785	8.26	2.19492e+06
1786	8.27	2.21158e+06
1787	8.27	2.19176e+06
1788	8.28	2.17506e+06
1789	8.28	2.16886e+06
1790	8.29	2208681
1791	8.29	2.2242e+06
1792	8.29	2.25505e+06
1793	8.3	2.2657e+06
1794	8.3	2.26977e+06
1795	8.31	2.23828e+06
1796	8.31	2.24382e+06
1797	8.32	2.24652e+06
1798	8.32	2261460
1799	8.33	2.277e+06
1800	8.33	2.28931e+06
1801	8.34	2.27966e+06
1802	8.34	2.27768e+06
1803	8.35	2.25875e+06
1804	8.35	2.22259e+06
1805	8.35	2.20942e+06
1806	8.36	2.20524e+06
1807	8.36	2.18889e+06
1808	8.37	2.18747e+06
1809	8.37	2.18901e+06
1810	8.38	2.18145e+06
1811	8.38	2.18286e+06
1812	8.39	2.20909e+06
1813	8.39	2.22771e+06
1814	8.4	2.23654e+06
1815	8.4	2242571
1816	8.41	2.23474e+06
1817	8.41	2224849
1818	8.41	2.20699e+06
1819	8.42	2.20501e+06
1820	8.42	2.19341e+06
1821	8.43	2.1924e+06
1822	8.43	2.19849e+06
1823	8.44	2.22015e+06
1824	8.44	2.22338e+06
1825	8.45	2.23523e+06
1826	8.45	2256579
1827	8.46	2.24159e+06
1828	8.46	2.22967e+06
1829	8.47	2.21397e+06
1830	8.47	2.18986e+06
1831	8.48	2167212
1832	8.48	2.1772e+06
1833	8.48	2.17579e+06
1834	8.49	2.17638e+06
1835	8.49	2.18419e+06
1836	8.5	2.19443e+06
1837	8.5	2.19656e+06
1838	8.51	2204328
1839	8.51	2.21012e+06
1840	8.52	2.19095e+06
1841	8.52	2.18388e+06
1842	8.53	2.18858e+06
1843	8.53	2.19916e+06
1844	8.54	2.18701e+06
1845	8.54	2.19003e+06
1846	8.54	2.18025e+06
1847	8.55	2.17385e+06
1848	8.55	2.17683e+06
1849	8.56	2.17897e+06
1850	8.56	2177722
1851	8.57	2.16652e+06
1852	8.57	2171542
1853	8.58	2.169e+06
1854	8.58	2.18987e+06
1855	8.59	2.18363e+06
1856	8.59	2.16529e+06
1857	8.6	2.14265e+06
1858	8.6	2128995
1859	8.6	2.11701e+06
1860	8.61	2.12455e+06
1861	8.61	2.12729e+06
1862	8.62	2.12515e+06
1863	8.62	2.13798e+06
1864	8.63	2.14738e+06
1865	8.63	2165513
1866	8.64	2.192e+06
1867	8.64	2.2161e+06
1868	8.65	2.18726e+06
1869	8.65	2.19339e+06
1870	8.66	2.1804e+06
1871	8.66	2.16821e+06
1872	8.66	2.16583e+06
1873	8.67	2191803
1874	8.67	2185813
1875	8.68	2192015
1876	8.68	2173916
1877	8.69	2.1667e+06
1878	8.69	2.15829e+06
1879	8.7	2.14875e+06
1880	8.7	2.15345e+06
1881	8.71	2.1735e+06
1882	8.71	2.17477e+06
1883	8.72	2.181e+06
1884	8.72	2.1954e+06
1885	8.73	2.18744e+06
1886	8.73	2162563
1887	8.73	2.15035e+06
1888	8.74	2.14774e+06
1889	8.74	2148079
1890	8.75	2165160
1891	8.75	2.17969e+06
1892	8.76	2.17388e+06
1893	8.76	2152295
1894	8.77	2135255
1895	8.77	2.13384e+06
1896	8.78	2141179
1897	8.78	2146380
1898	8.79	2.15741e+06
1899	8.79	2.17506e+06
1900	8.79	2.18018e+06
1901	8.8	2.18584e+06
1902	8.8	2.20403e+06
1903	8.81	2220266
1904	8.81	2.21796e+06
1905	8.82	2.21375e+06
1906	8.82	2211721
1907	8.83	2170536
1908	8.83	2.15619e+06
1909	8.84	2.13405e+06
1910	8.84	2154477
1911	8.85	2.17511e+06
1912	8.85	2.21991e+06
1913	8.85	2.22071e+06
1914	8.86	2.2283e+06
1915	8.86	2.19666e+06
1916	8.87	2171831
1917	8.87	2.15039e+06
1918	8.88	2.15006e+06
1919	8.88	2140294
1920	8.89	2139043
1921	8.89	2.1335e+06
1922	8.9	2.12374e+06
1923	8.9	2.11496e+06
1924	8.91	2122525
1925	8.91	2.12208e+06
1926	8.91	2.12186e+06
1927	8.92	2.14948e+06
1928	8.92	2.18503e+06
1929	8.93	2212519
1930	8.93	2214731
1931	8.94	2218266
1932	8.94	2.19714e+06
1933	8.95	2.18328e+06
1934	8.95	2.17249e+06
1935	8.96	2.19317e+06
1936	8.96	2.20258e+06
1937	8.97	2.19154e+06
1938	8.97	2191198
1939	8.98	2182487
1940	8.98	2.17335e+06
1941	8.98	2157163
1942	8.99	2.17453e+06
1943	8.99	2.17556e+06
1944	9	2191388
1945	9	2193442
1946	9.01	2.2051e+06
1947	9.01	2.19694e+06
1948	9.02	2.20596e+06
1949	9.02	2217663
1950	9.03	2.21964e+06
1951	9.03	2225642
1952	9.04	2214195
1953	9.04	2.1954e+06
1954	9.04	2178566
1955	9.05	2.18579e+06
1956	9.05	2198503
1957	9.06	2202043
1958	9.06	2197857
1959	9.07	2.18882e+06
1960	9.07	2.16521e+06
1961	9.08	2.14294e+06
1962	9.08	2.1542e+06
1963	9.09	2.15665e+06
1964	9.09	2.16231e+06
1965	9.1	2158921
1966	9.1	2.15335e+06
1967	9.1	2.15459e+06
1968	9.11	2161214
1969	9.11	2.1537e+06
1970	9.12	2.17052e+06
1971	9.12	2.16544e+06
1972	9.13	2.14862e+06
1973	9.13	2.14044e+06
1974	9.14	2.15942e+06
1975	9.14	2.14708e+06
1976	9.15	2178345
1977	9.15	2191673
1978	9.16	2.18527e+06
1979	9.16	2.16455e+06
1980	9.16	2.17158e+06
1981	9.17	2.13699e+06
1982	9.17	2.14147e+06
1983	9.18	2.1468e+06
1984	9.18	2150808
1985	9.19	2.16094e+06
1986	9.19	2.1862e+06
1987	9.2	2185842
1988	9.2	2192885
1989	9.21	2.18496e+06
1990	9.21	2174159
1991	9.22	2.1739e+06
1992	9.22	2187534
1993	9.23	2.18714e+06
1994	9.23	2.18359e+06
1995	9.23	2.20029e+06
1996	9.24	2.19493e+06
1997	9.24	2.19116e+06
[truncated: 2,327 more rows]
