# Supplementary material for: Electron transfer engineering of artificially designed cell factory for complete biosynthesis of natural products
Source: Research Square preprint supplement (doi:10.21203/rs.3.rs-4718218/v1), 2024-08-01
Supplement: Supplementary file 22 [file ac7da3f1579f863144672631.xlsx]

## Sheet: Fig1B
	Cho production					OD600
				Mean	Standard Deviation				Mean	Standard Deviation
BtDhcr7	31.9	31.3	32.9	32.0333	0.80829	4.3	4.1	4.5	4.3	0.2
PhDhcr7	14.3	14.5	12.1	13.6333	1.33167	4.2	4.4	4.3	4.3	0.1
SsDhcr7	9.3	8.7	11.5	9.83333	1.47422	4	4.1	4.2	4.1	0.1
DrDhcr7	13.6	10.8	14.7	13.0333	2.0108	3.9	3.7	3.9	3.83333	0.11547

## Sheet: Fig1C
	Cho production					OD600
				Mean	Standard Deviation				Mean	Standard Deviation
Blank	205.193	209.1	203.5	205.931	2.87204	4	4.3	3.9	4.06667	0.20817
BtDhcr7	146.023	144	149	146.341	2.51511	4.3	4.1	4.5	4.3	0.2
PhDhcr7	185.871	180	173	179.624	6.44386	4.2	4.4	4.3	4.3	0.1
SsDhcr7	191.126	195.3	190.6	192.342	2.57508	4	4.1	4.2	4.1	0.1
DrDhcr7	187.253	182.5	188.7	186.151	3.24358	3.9	3.7	3.9	3.83333	0.11547

## Sheet: Fig2B
	Cho production
				Mean	Standard Deviation
WT	31.9	31.3	32.9	32.0333	0.80829
Y317F	0	0	0	0	0
F430A	2.63	2.77	2.2	2.53333	0.29704
F434A	3.11	3.35	3.68	3.38	0.28618
F430AF434A	0	0	0	0	0
Y55A	2.352	2.22	2.68	2.41733	0.23686
F56A	1.785	1.278	1.955	1.67267	0.3522
Y55AF65A	0	0	0	0	0

## Sheet: Fig2D
	Cho production
				Mean	Standard Deviation
BtDHCR7	31.9	31.3	32.9	32.0333	0.80829
L67G	12.3	15.6	17.9	15.2667	2.81484
L67A	27.83	31.4	28.5	29.2433	1.89753
L67V*	63.4	69.2	65.43	66.01	2.94318
L67I	41.5	43.66	41.79	42.3167	1.17236
L67V-L426G	51.3	50.7	52.6	51.5333	0.97125
L67V-L426A*(M1)	72.5287	78.7817	78.5	76.6035	3.53165
L67V-L426V	69.3	64.5	60.5	64.7667	4.40606
L67V-L426I	35.8	34.27	38.96	36.3433	2.39174
W280Y	84.3601	88.6601	81.82	84.9467	3.45756
W280YY290W*(M2)	92.3601	93.8831	90.7	92.3144	1.59202

## Sheet: Fig2E
	Cho production
				Mean	Standard Deviation
M2	92.3601	93.8831	90.7	92.3144	1.59202
M2	92.3601	93.8831	90.7	92.3144	1.59202
A49M	85.43	81.78	75.63	80.9467	4.95286
A49S	27.5	18.69	28.57	24.92	5.4218
A49T	66.98	62.85	69.88	66.57	3.53289
A49W	21.8	25.38	27.67	24.95	2.95853
A49Y	56.37	57.85	63.85	59.3567	3.96108
I53Y	107.5	105.6	111.6	108.233	3.06649
I53W	117.6	121.3	123.2	120.7	2.84781
I53T*(M3)	125.4	120.8	126.8	124.333	3.139
F430Y	186.3	180.7	179.8	182.267	3.52184
F430Y-F434Y*(M4)	190	197.88	187.3	191.727	5.49728

## Sheet: Fig3A
	Distance
	WTBtDHCR7				MuBtDHCR7
Time (ns)	Y56-F55	F55-F430	F430-F434	F434-Y317	T53-Y430	Y430-Y434	Y434-Y317
0	6.344	6.237	4.986	4.605	4.237	4.039	5.92
0.01	6.88	5.796	4.878	4.495	4.323	3.916	2.92
0.02	6.736	6.21	5.265	4.295	4.244	3.913	3.14
0.03	6.344	6.084	4.914	4.5	4.187	3.886	2.79
0.04	6.272	6.948	4.905	4.395	4.18	3.898	2.88
0.05	6.48	6.291	5.103	4.315	4.263	3.92	2.93
0.06	6.128	6.84	5.211	4.82	4.22	3.909	3.13
0.07	6.528	7.299	5.193	4.865	4.272	3.895	2.8
0.08	6.104	7.038	5.544	5.16	4.197	3.942	3.12
0.09	6.56	7.254	5.751	4.39	4.221	3.908	4
0.1	6.52	7.38	5.265	4.9	4.226	3.908	2.92
0.11	6.616	7.128	5.472	5.05	4.257	3.899	2.8
0.12	6.56	7.074	5.427	4.7	4.226	3.86	3.36
0.13	6.424	7.2	5.49	5.17	4.218	3.918	3.19
0.14	6.312	7.038	5.463	5.195	4.235	3.832	2.93
0.15	6.552	6.768	5.553	5.14	4.372	3.888	3.3
0.16	6.592	8.118	5.706	5.4	4.267	3.84	2.68
0.17	6.352	8.748	4.968	5.45	4.257	3.854	3.45
0.18	6.664	8.325	5.193	5.18	4.256	3.922	3.32
0.19	6.608	8.271	5.391	5.29	4.321	3.942	2.87
0.2	6.536	8.217	5.652	5.445	4.378	3.914	2.73
0.21	6.672	8.91	5.22	5.37	4.359	3.953	3.18
0.22	6.408	9.432	5.409	5.17	4.337	3.913	2.98
0.23	6.432	8.46	5.229	5.355	4.321	3.93	3.1
0.24	6.624	8.793	5.328	5.57	4.273	3.928	3
0.25	6.36	9.108	5.58	5.475	4.22	3.845	2.94
0.26	6.952	7.938	5.211	4.765	4.262	3.847	3.24
0.27	6.872	7.11	5.121	4.625	4.165	3.876	3.19
0.28	6.32	7.083	5.499	4.68	4.209	3.872	2.78
0.29	6.592	7.02	5.274	4.66	4.333	3.837	2.93
0.3	7.224	7.245	5.499	4.695	4.195	3.798	2.77
0.31	6.952	7.326	5.4	4.935	4.227	3.863	3.18
0.32	6.32	7.245	4.959	4.875	4.239	3.9	2.98
0.33	6.36	8.253	5.409	4.775	4.32	3.903	3.05
0.34	6.392	7.551	5.535	4.84	4.232	3.891	2.87
0.35	6.336	7.443	5.4	4.655	4.183	3.853	2.95
0.36	6.36	7.74	5.31	4.355	4.314	3.867	3.26
0.37	6.848	8.001	5.364	4.635	4.307	3.876	2.83
0.38	6.408	7.254	5.193	4.37	4.279	3.779	3.46
0.39	6.896	7.182	5.148	4.825	4.261	3.845	2.78
0.4	6.56	7.254	5.319	4.8	4.292	3.846	2.91
0.41	6.68	6.939	5.13	4.65	4.243	3.858	3.32
0.42	6.512	7.2	5.652	5.06	4.376	3.894	2.63
0.43	6.176	6.804	5.13	4.685	4.374	3.871	2.85
0.44	6.872	6.885	5.265	4.855	4.25	3.84	2.81
0.45	6.808	6.696	5.409	4.63	4.202	3.855	3.06
0.46	6.704	7.389	5.319	4.485	4.301	3.898	3.04
0.47	6.424	6.93	5.4	4.595	4.272	3.909	2.98
0.48	6.328	7.101	5.4	4.64	4.189	3.788	3.44
0.49	6.64	7.101	5.265	4.94	4.139	3.787	2.63
0.5	7.416	7.623	4.995	4.9	4.211	3.883	3.07
0.51	7.024	7.263	5.229	4.995	4.237	3.906	2.78
0.52	6.576	7.758	5.139	5.16	4.281	3.908	3.01
0.53	6.728	7.407	5.202	5.06	4.261	3.798	2.96
0.54	6.352	7.821	5.841	4.715	4.218	3.896	3.29
0.55	6.816	6.678	5.778	4.68	4.236	3.857	3.05
0.56	6.408	7.182	5.472	4.72	4.182	3.831	3.26
0.57	7.096	6.984	5.058	4.685	4.212	3.852	2.81
0.58	6.632	7.227	5.175	4.65	4.269	3.896	2.93
0.59	5.92	7.578	5.4	4.825	4.218	3.871	2.87
0.6	6.6	7.146	5.652	4.93	4.216	3.833	2.68
0.61	7.776	7.173	5.031	5.11	4.241	3.873	2.72
0.62	6.328	6.696	5.373	5.345	4.22	3.89	3.09
0.63	6.504	7.443	5.094	4.88	4.232	3.899	3.23
0.64	7.032	6.714	5.058	4.91	4.306	3.804	3
0.65	6.472	7.641	5.904	4.835	4.222	3.882	3.09
0.66	6.496	6.858	4.95	4.89	4.22	3.793	2.76
0.67	7.024	7.254	5.292	4.855	4.198	3.827	2.83
0.68	6.392	6.741	5.373	4.555	4.321	3.963	2.81
0.69	7.096	7.092	5.139	4.975	4.401	3.895	2.94
0.7	6.688	7.128	5.355	5.46	4.342	3.94	2.94
0.71	6.84	6.831	4.995	4.795	4.341	3.921	2.86
0.72	6.552	7.065	5.328	4.645	4.311	3.865	2.86
0.73	6.552	7.893	5.391	4.735	4.311	3.94	2.88
0.74	6.832	6.849	5.193	4.53	4.32	3.836	2.93
0.75	6.872	7.686	4.995	4.715	4.284	3.916	2.91
0.76	6.16	7.686	5.697	4.775	4.296	3.8	3.09
0.77	6.728	7.641	5.121	5.06	4.301	3.895	2.77
0.78	6.24	7.776	5.472	4.92	4.212	3.833	3.02
0.79	6.8	6.822	5.103	4.7	4.266	4.03	3.01
0.8	6.112	7.038	5.112	5.005	4.201	3.967	3.14
0.81	7.112	7.452	4.959	5.135	4.175	3.993	2.86
0.82	7.24	7.119	5.445	5.08	4.248	4.003	2.79
0.83	6.432	7.254	4.995	5.02	4.274	4.053	3.11
0.84	6.992	7.173	5.067	4.975	4.188	4.058	3.45
0.85	7.224	7.056	5.553	4.74	4.318	4.003	3.18
0.86	7.568	7.722	5.148	4.86	4.186	4.037	3.02
0.87	7.032	8.037	5.292	4.785	4.172	4.007	2.89
0.88	6.776	7.119	5.139	4.845	4.196	4.058	2.96
0.89	6.736	7.686	5.67	4.915	4.312	4.029	3.04
0.9	7.024	7.731	5.382	4.655	4.063	4.006	3.15
0.91	6.512	7.65	5.013	4.88	4.205	3.938	3.2
0.92	6.36	8.334	5.688	4.46	4.269	3.985	3.58
0.93	6.568	8.163	5.409	4.86	4.222	3.946	3.04
0.94	6.28	7.398	5.301	5.015	4.262	3.94	2.74
0.95	7.24	7.578	5.274	4.71	4.335	3.942	2.8
0.96	7.32	7.56	5.256	4.75	4.238	3.816	2.76
0.97	6.352	7.974	5.472	5.145	4.216	3.783	3.1
0.98	6.344	7.767	5.013	5.15	4.256	3.86	3.4
0.99	6.944	7.227	5.265	4.925	4.27	3.855	2.91
1	7.24	7.74	5.031	4.985	4.229	3.924	3.02
1.01	6.848	8.487	5.355	4.81	4.207	3.777	2.77
1.02	7.088	7.776	5.355	4.925	4.205	3.8	2.86
1.03	6.744	7.29	5.193	5.26	4.195	3.816	2.8
1.04	6.976	7.29	5.364	4.88	4.127	3.847	3.4
1.05	7.168	7.29	5.328	4.76	4.255	3.818	2.93
1.06	7.6	7.218	5.454	4.745	4.279	3.839	3.16
1.07	6.744	7.542	5.148	4.4	4.251	3.85	3.12
1.08	7.184	8.163	5.418	4.765	4.25	3.865	2.88
1.09	6.96	7.578	5.112	4.93	4.239	3.926	3.91
1.1	7.04	7.182	5.193	5.15	4.244	3.83	2.92
1.11	7	7.497	5.4	4.715	4.27	3.882	2.84
1.12	7.048	7.866	4.923	5.12	4.169	3.863	2.72
1.13	6.68	6.993	5.445	5.065	4.271	3.909	3.21
1.14	6.984	7.902	5.283	5.175	4.325	3.906	2.87
1.15	6.784	7.38	5.229	4.915	4.349	3.858	2.84
1.16	6.904	7.668	5.166	4.84	4.404	3.882	3.28
1.17	6.584	7.569	5.184	5.13	4.304	3.825	2.92
1.18	7.424	7.38	5.166	5.245	4.274	3.876	2.97
1.19	6.696	7.002	4.923	5.15	4.287	3.794	3.01
1.2	7.368	7.227	5.301	5.225	4.365	3.893	2.93
1.21	6.56	7.344	4.932	4.69	4.359	3.813	3.32
1.22	6.744	7.29	5.067	4.925	4.304	3.846	3.12
1.23	7	6.993	5.229	5.015	4.408	3.9	2.69
1.24	7.592	7.335	5.067	4.745	4.265	3.857	3.53
1.25	7.528	7.362	4.932	5.27	4.296	3.843	2.98
1.26	7.368	7.47	5.211	4.885	4.327	3.881	3.01
1.27	7.12	7.92	4.923	5.365	4.321	3.949	2.78
1.28	7.44	7.209	5.292	4.615	4.356	3.924	2.85
1.29	6.608	6.48	5.292	4.86	4.384	3.871	2.89
1.3	7.088	7.146	4.905	4.98	4.237	3.989	3.22
1.31	7.872	7.002	5.166	4.99	4.28	3.966	2.93
1.32	7.336	7.542	5.436	5.25	4.327	3.92	3.42
1.33	6.792	7.695	5.049	5.045	4.32	3.838	2.99
1.34	6.336	6.975	5.292	4.695	4.359	3.919	3.1
1.35	6.496	7.452	5.436	4.9	4.303	3.826	2.75
1.36	6.184	7.155	5.391	5.075	4.301	3.79	2.8
1.37	6.272	7.47	5.193	4.795	4.369	3.871	3.35
1.38	7.024	7.83	5.121	5.06	4.342	3.864	2.86
1.39	7.744	7.065	5.346	5.025	4.357	3.809	2.96
1.4	7.696	7.263	5.31	5.02	4.381	3.915	2.95
1.41	6.976	7.164	5.139	4.775	4.394	3.877	3.84
1.42	7.096	7.641	5.328	4.535	4.355	3.76	2.8
1.43	6.736	8.037	5.094	4.735	4.186	3.671	2.84
1.44	6.344	6.894	4.968	4.675	4.119	3.7	2.7
1.45	6.408	7.488	4.896	4.755	4.203	3.708	2.85
1.46	6.944	6.912	5.319	5.14	4.188	3.625	2.78
1.47	6.944	7.407	5.13	4.48	4.352	3.726	3.1
1.48	7.112	6.696	5.076	4.67	4.343	3.758	3.61
1.49	7.032	7.056	5.301	4.345	4.286	3.821	3.05
1.5	6.024	7.641	5.427	4.845	4.352	3.774	3.74
1.51	6.744	7.542	4.932	4.525	4.183	3.672	2.72
1.52	5.744	7.227	5.301	4.315	4.247	3.685	3.89
1.53	6.048	7.371	5.319	4.67	4.227	3.721	3.27
1.54	6.192	6.993	5.229	5.01	4.324	3.844	2.69
1.55	6.776	7.317	5.067	4.795	4.245	3.742	3.25
1.56	6.64	7.47	5.193	4.635	4.163	3.606	2.97
1.57	6.424	7.452	5.364	5.3	4.266	3.741	3.22
1.58	5.976	7.065	4.833	4.9	4.223	3.753	3.2
1.59	6.232	6.777	5.121	4.88	4.26	3.639	3
1.6	6.256	7.371	4.824	4.29	4.221	3.624	3.13
1.61	6.28	6.831	5.067	4.815	4.229	3.645	2.95
1.62	7.144	7.146	5.139	4.65	4.219	3.65	3.54
1.63	7.024	7.245	5.004	4.32	4.169	3.651	3.04
1.64	6.656	7.767	5.13	4.72	4.14	3.663	2.93
1.65	6.256	7.389	5.022	4.32	4.145	3.632	2.81
1.66	7.216	7.101	5.391	4.545	4.25	3.696	2.73
1.67	6.76	7.155	5.463	4.645	4.195	3.699	3.02
1.68	6.928	7.272	4.905	4.745	4.181	3.632	2.97
1.69	6.192	7.749	5.391	4.72	4.233	3.613	2.94
1.7	7.248	7.254	5.067	4.605	4.183	3.629	3.23
1.71	6.984	6.921	5.391	4.505	4.174	3.7	3.03
1.72	6.952	6.777	5.319	4.695	4.121	3.67	3.5
1.73	6.672	8.037	5.094	4.985	4.208	3.667	3.01
1.74	6.144	7.029	5.58	4.62	4.178	3.642	3.33
1.75	6.64	7.362	5.418	4.91	4.114	3.638	3
1.76	7.184	7.965	5.013	4.405	4.093	3.656	5.53
1.77	7.2	7.794	5.544	4.52	4.194	3.76	5.8
1.78	7.368	7.884	4.842	4.85	4.209	3.733	2.97
1.79	6.264	7.578	5.238	4.905	4.145	3.584	2.75
1.8	6.456	7.821	5.508	4.685	4.191	3.684	3.13
1.81	6.56	7.218	5.13	4.81	4.147	3.68	3.17
1.82	6.528	6.768	5.175	5.15	4.188	3.665	2.77
1.83	6.584	7.47	5.085	4.725	4.22	3.619	3.15
1.84	6.736	7.119	5.4	4.835	4.222	3.663	3.24
1.85	6.72	7.704	5.481	4.585	4.261	3.764	3.08
1.86	6.248	7.551	5.274	4.92	4.286	3.689	2.88
1.87	6.808	7.587	5.166	4.46	4.126	3.59	2.9
1.88	7.032	6.948	5.166	4.845	4.284	3.688	3
1.89	7.424	6.912	5.364	4.705	4.237	3.688	2.88
1.9	7.088	6.858	4.959	4.54	4.274	3.71	3.6
1.91	7.136	6.777	5.049	4.955	4.161	3.637	3.17
1.92	6.56	7.668	4.968	4.625	4.236	3.715	2.93
1.93	6.64	6.705	5.265	4.82	4.118	3.569	2.89
1.94	6.912	7.047	5.211	5.09	4.227	3.629	2.89
1.95	6.76	7.191	5.094	5.085	4.264	3.678	3.4
1.96	6.552	7.119	5.04	5.215	4.208	3.594	2.96
1.97	6.864	7.875	4.923	4.935	4.255	3.626	4.39
1.98	6.936	7.38	5.193	5.07	4.235	3.649	3
1.99	6.904	6.66	4.995	4.7	4.239	3.636	3.79
2	6.672	7.11	5.085	5.22	4.254	3.68	2.88
2.01	5.992	7.164	5.175	4.73	4.122	3.599	2.88
2.02	7.096	7.335	5.076	5.425	4.199	3.637	2.84
2.03	6.576	7.866	4.824	5.165	4.052	3.669	2.8
2.04	6.432	7.578	5.283	5.02	4.18	3.663	2.99
2.05	7.36	7.056	5.13	4.8	4.191	3.654	2.9
2.06	6.384	7.146	5.355	4.885	4.232	3.672	3.59
2.07	6.152	7.335	4.815	5.14	4.098	3.629	2.75
2.08	6.424	7.11	5.022	4.775	4.291	3.752	2.97
2.09	6.152	7.056	4.896	4.72	4.289	3.694	3.18
2.1	6.704	7.542	5.004	5.05	4.194	3.666	2.78
2.11	6.176	6.831	5.472	4.845	4.24	3.617	2.95
2.12	6.112	7.137	5.094	4.56	4.267	3.804	4.69
2.13	6.264	7.416	5.346	4.795	4.227	3.647	2.89
2.14	6.352	7.092	5.238	4.81	4.172	3.655	2.78
2.15	7.056	6.615	4.986	4.735	4.184	3.684	3.01
2.16	6.768	7.182	5.238	4.8	4.121	3.702	2.7
2.17	6.592	6.903	5.175	4.72	4.265	3.768	3.65
2.18	6.296	7.461	5.166	4.98	4.216	3.667	3.26
2.19	6.488	7.038	5.013	5.07	4.035	3.626	3.06
2.2	7.472	7.767	5.211	5.32	4.149	3.641	2.93
2.21	6.008	7.29	4.878	5.125	4.178	3.588	2.95
2.22	6.632	6.84	5.202	4.87	4.052	3.615	2.69
2.23	6.512	7.092	5.184	4.8	4.069	3.634	3.05
2.24	6.76	6.84	5.301	5.115	4.232	3.825	2.9
2.25	6.176	6.948	5.085	5.225	4.206	3.705	2.88
2.26	6.72	7.047	4.896	4.8	4.251	3.715	2.83
2.27	6.368	7.794	5.391	5.14	4.256	3.7	2.96
2.28	6.88	7.551	5.103	4.565	4.199	3.707	2.66
2.29	6.312	7.542	5.247	4.785	4.262	3.743	3.07
2.3	6.432	7.47	5.445	5	4.209	3.625	2.92
2.31	6.888	7.29	5.517	5.365	4.17	3.699	2.86
2.32	6.592	7.623	5.373	5.315	4.187	3.665	2.76
2.33	6.68	6.822	5.076	4.835	4.176	3.667	3.1
2.34	6.552	6.948	4.887	5.21	4.143	3.606	3.05
2.35	6.04	7.074	4.968	4.89	4.137	3.655	2.88
2.36	5.64	7.146	5.391	5.03	4.184	3.646	2.81
2.37	6.68	8.01	5.256	4.47	4.182	3.633	2.85
2.38	6.888	6.948	5.013	4.8	4.281	3.711	2.91
2.39	6.656	6.822	5.193	4.505	4.218	3.72	3.36
2.4	6.008	7.263	5.409	4.59	4.106	3.735	2.94
2.41	6.224	6.804	5.778	4.63	4.077	3.654	3.12
2.42	5.968	7.335	5.157	4.965	4.182	3.675	2.82
2.43	6.576	7.452	5.346	4.705	4.244	3.678	2.87
2.44	6.024	7.137	5.022	4.82	4.117	3.613	2.9
2.45	6.608	7.038	4.977	4.82	4.194	3.603	2.96
2.46	6.392	7.299	4.977	4.71	4.222	3.675	2.69
2.47	6.096	7.317	5.031	4.865	4.205	3.597	3.02
2.48	5.904	6.768	5.085	4.855	4.237	3.655	3
2.49	6.312	7.524	5.121	5.045	4.115	3.683	4.48
2.5	7.048	7.848	4.95	4.71	4.171	3.651	2.77
2.51	6.576	7.272	5.076	4.78	4.163	3.677	2.86
2.52	6.408	7.695	5.22	4.65	4.159	3.655	2.78
2.53	6.592	6.849	5.346	4.815	4.248	3.642	2.83
2.54	6.08	7.056	5.211	4.585	4.078	3.624	2.66
2.55	5.912	7.164	5.103	5.245	4.063	3.667	2.88
2.56	6.552	6.993	5.832	4.555	4.201	3.654	3.05
2.57	7.472	7.2	5.589	4.85	4.171	3.646	3.01
2.58	6.544	7.875	5.058	4.78	4.076	3.606	3.11
2.59	6.656	7.398	4.779	4.93	4.078	3.703	3.88
2.6	6.576	7.758	5.544	4.81	4.16	3.694	5.47
2.61	6.96	7.137	5.544	4.665	4.172	3.617	5.94
2.62	6.976	7.236	5.544	4.59	4.156	3.65	6.53
2.63	6.576	6.903	5.418	4.375	4.225	3.757	6.38
2.64	6.832	6.939	4.959	4.645	4.091	3.7	6.08
2.65	7.056	6.921	5.634	4.57	4.176	3.658	3.65
2.66	6.24	6.939	5.166	4.905	4.199	3.696	6.8
2.67	6.392	7.128	5.238	4.845	4.01	3.686	5.51
2.68	6.464	6.903	5.364	4.96	4.181	3.702	5.6
2.69	6.8	6.552	4.86	5.2	4.16	3.699	5.18
2.7	6.56	7.569	4.788	4.765	4.145	3.693	4.7
2.71	6.776	7.821	4.869	5.17	4.186	3.734	7.16
2.72	6.384	6.822	5.022	5.085	4.279	3.818	5.37
2.73	7.408	7.191	5.058	5.195	4.128	3.676	5.22
2.74	6.56	6.714	5.121	4.905	4.118	3.663	5.66
2.75	6.912	7.461	5.616	5.185	4.177	3.762	6.54
2.76	6.544	7.11	4.905	4.885	4.133	3.657	6.84
2.77	6.512	7.092	5.148	4.665	4.095	3.644	5.74
2.78	6.44	7.101	5.355	4.7	4.093	3.761	5.45
2.79	6.888	7.704	5.094	4.71	4.12	3.736	7.35
2.8	6.712	7.677	4.86	4.865	4.178	3.695	5.37
2.81	6.96	7.47	5.022	4.9	4.163	3.684	5.48
2.82	6.872	7.407	5.229	4.675	4.207	3.662	4.64
2.83	6.072	7.938	5.265	4.435	4.214	3.698	4.63
2.84	6.616	7.803	5.571	5.075	4.228	3.763	6.58
2.85	6.648	7.317	5.283	4.97	4.154	3.673	4.83
2.86	6.488	7.992	4.815	4.92	4.252	3.702	5.26
2.87	7.064	7.344	4.797	4.725	4.232	3.737	4.82
2.88	6.536	6.93	5.094	4.735	4.175	3.725	7.72
2.89	6.952	7.641	5.436	4.89	4.287	3.782	5.26
2.9	6.736	7.11	5.337	5.225	4.144	3.698	4.55
2.91	7.376	7.614	5.166	4.695	4.195	3.747	5.28
2.92	6.728	7.614	4.896	5.16	4.047	3.668	5.88
2.93	6.592	8.217	5.139	5.005	4.138	3.686	7.05
2.94	7.2	7.947	5.175	5.15	4.155	3.714	5.7
2.95	6.896	7.65	5.238	5.07	4.198	3.726	5.58
2.96	7	7.956	5.112	4.805	4.266	3.761	6.99
2.97	6.664	7.821	5.211	4.985	4.2	3.677	4.92
2.98	6.896	7.911	5.328	5.265	4.233	3.714	2.97
2.99	6.936	7.794	5.535	4.625	4.168	3.669	5.29
3	7.184	7.938	5.427	4.74	4.117	3.706	8.69
3.01	6.744	8.307	5.121	4.825	4.102	3.71	7.64
3.02	6.512	7.947	5.139	4.785	4.107	3.631	8.5
3.03	7.584	7.281	5.193	4.95	4.197	3.694	8.2
3.04	6.504	8.082	5.463	4.87	4.192	3.713	6.57
3.05	6.712	8.442	5.382	5.14	4.07	3.713	7.37
3.06	6.848	8.217	5.742	4.72	4.156	3.771	7.52
3.07	7.08	7.416	4.968	4.775	4.199	3.673	5.8
3.08	7.384	7.407	5.472	4.71	4.058	3.65	7.2
3.09	6.464	7.461	5.247	4.905	4.178	3.765	6.02
3.1	6.736	7.965	5.517	4.53	4.106	3.693	7.35
3.11	7.856	7.911	5.166	5.05	4.085	3.668	8.19
3.12	6.984	7.38	4.977	4.985	4.132	3.697	9.44
3.13	6.128	8.199	5.292	5.15	3.963	3.667	9.31
3.14	6.736	7.776	5.274	5.24	4.009	3.645	8.75
3.15	6.76	8.505	5.211	5.305	4.202	3.688	3.04
3.16	6.744	7.992	5.229	5.245	4.194	3.704	4.88
3.17	6.92	9.306	5.625	5.42	4.093	3.675	4.76
3.18	7	8.055	5.616	5.195	4.083	3.712	4.02
3.19	6.72	8.271	5.544	5.28	4.088	3.731	5.21
3.2	6.48	8.703	5.265	5.225	4.231	3.76	3.87
3.21	6.912	7.533	5.418	5.24	4.31	3.822	5.6
3.22	6.84	7.803	5.256	5.355	4.16	3.694	4.86
3.23	7.536	8.325	5.184	5.3	4.18	3.795	5.53
3.24	8.032	8.955	5.481	5.015	4.301	3.863	6.08
3.25	6.856	8.622	4.887	5.525	4.161	3.85	8.07
3.26	6.808	7.713	5.589	5.055	4.301	3.893	5.54
3.27	6.168	8.469	5.049	5.07	4.293	3.831	6.6
3.28	6.272	7.848	5.652	5.45	4.289	3.904	5.13
3.29	6.824	8.127	4.914	5.695	4.31	3.922	5.34
3.3	6.336	8.208	5.13	5.04	4.251	3.934	4.97
3.31	8.152	8.298	5.13	4.93	4.376	3.996	5.37
3.32	5.744	8.361	5.283	4.89	4.319	3.955	5.48
3.33	6.2	7.911	5.607	4.91	4.322	3.921	5.16
3.34	6.136	8.55	5.436	5.02	4.375	3.947	4.84
3.35	7.576	8.532	5.337	5.21	4.307	3.939	5.07
3.36	6.984	8.973	5.67	5.94	4.386	3.925	4.4
3.37	7.672	8.082	5.589	4.97	4.267	3.928	5.85
3.38	6.912	8.343	5.769	4.96	4.288	3.895	4.74
3.39	6.448	7.839	5.562	5.195	4.341	3.814	6.1
3.4	6.904	8.397	5.499	4.99	4.373	3.937	4.83
3.41	7.088	8.316	5.607	4.935	4.288	3.917	5.31
3.42	6.568	7.758	5.292	5.2	4.34	3.885	4.68
3.43	6.616	7.488	5.49	5.08	4.363	3.96	2.96
3.44	7.024	7.857	5.814	4.94	4.262	3.746	5.82
3.45	6.952	8.172	5.742	4.64	4.319	3.796	5.25
3.46	7.24	7.389	5.499	5.025	4.345	3.865	5.23
3.47	6.76	7.794	5.706	5	4.171	3.703	3.82
3.48	7.064	7.281	5.454	4.885	4.169	3.676	2.94
3.49	6.8	7.569	5.472	4.88	4.267	3.705	2.92
3.5	7.144	8.217	5.472	5.17	4.188	3.63	3.27
3.51	6.504	7.785	5.4	4.855	4.318	3.759	4.62
3.52	6.48	7.677	5.265	5.305	4.213	3.749	5.64
3.53	6.52	8.01	5.265	4.78	4.22	3.633	5.45
3.54	6.792	7.902	5.4	4.975	4.005	3.737	6
3.55	6.544	7.299	5.562	5.015	4.054	3.747	5.36
3.56	6.72	7.686	5.643	4.895	3.966	3.704	4.81
3.57	7.2	8.226	5.229	5.14	3.961	3.73	6.81
3.58	7.24	8.478	5.22	5.29	3.992	3.843	5.51
3.59	7.304	7.839	5.157	5.2	4.034	3.707	4.58
3.6	6.632	8.163	5.571	4.65	4.077	3.692	4.43
3.61	6.16	8.253	5.364	5.31	4.085	3.64	5.84
3.62	6.76	8.316	5.832	5.07	3.982	3.697	5.77
3.63	6.848	7.605	5.175	4.965	4.207	3.723	5.07
3.64	6.328	8.523	5.283	5.805	4.067	3.651	7.25
3.65	6.52	7.839	5.31	5.49	4.108	3.672	4.74
3.66	6.144	7.821	5.193	5.295	4.121	3.714	4.91
3.67	6.36	7.236	5.625	5.585	4.114	3.691	5.46
3.68	6.736	7.677	5.859	4.985	4.112	3.719	4.82
3.69	6.576	8.253	5.706	5.1	4.141	3.746	5.69
3.7	6.528	7.587	5.634	4.935	4.241	3.731	3.33
3.71	6.384	8.406	5.391	5.225	4.137	3.743	2.77
3.72	6.608	8.118	5.193	5.37	4.04	3.627	2.88
3.73	7.12	8.64	5.778	4.535	4.224	3.733	2.81
3.74	6.696	7.497	5.247	5.035	4.193	3.633	3.04
3.75	7.248	8.379	5.31	5.105	4.177	3.646	3.23
3.76	7.096	7.875	5.778	5.295	4.135	3.786	2.89
3.77	6.808	7.452	5.598	4.585	4.094	3.68	3.06
3.78	6.52	7.866	5.436	4.48	4.238	3.842	2.8
3.79	6.76	8.163	5.139	5.19	4.171	3.855	2.82
3.8	6.176	8.073	5.013	5.355	4.182	3.881	2.95
3.81	6.592	7.2	5.292	4.92	4.146	3.69	2.8
3.82	6.4	7.452	5.247	4.935	4.299	3.848	3.1
3.83	6.512	7.614	5.4	5.235	4.17	3.731	2.73
3.84	7.024	8.01	5.346	5.29	4.188	3.844	2.72
3.85	6.312	8.757	5.157	5.68	4.233	3.83	2.82
3.86	6.616	7.839	5.373	5.105	4.057	3.713	2.95
3.87	6.92	8.28	5.211	5.465	4.12	3.704	2.93
3.88	6.488	7.974	5.22	5.28	4.078	3.677	2.84
3.89	7.72	7.893	5.04	5.365	4.144	3.753	3.24
3.9	6.68	7.839	5.499	4.965	3.969	3.633	3.56
3.91	6.864	8.217	5.625	4.7	4.101	3.762	3.18
3.92	6.96	7.848	5.553	4.46	4.053	3.662	2.98
3.93	6.824	7.38	5.598	4.69	4.054	3.695	3.54
3.94	6.504	7.245	5.373	5.085	4.045	3.684	3.01
3.95	7.08	8.532	5.679	4.95	4.08	3.73	2.87
3.96	6.52	7.938	5.499	5.04	3.975	3.671	3.6
3.97	7.136	7.227	5.454	4.8	3.945	3.651	2.67
3.98	6.616	7.929	5.688	5.335	3.932	3.65	3.06
3.99	6.824	7.398	5.445	4.935	3.886	3.712	3.19
4	6.872	7.362	5.598	5.015	3.947	3.646	2.74
4.01	6.896	7.533	5.364	4.955	4.003	3.616	3.43
4.02	7.064	8.109	5.373	4.76	4.021	3.613	3.25
4.03	6.688	7.191	5.328	4.995	4.054	3.746	2.75
4.04	7.728	7.695	5.535	4.905	4.021	3.67	2.92
4.05	6.328	7.758	5.319	5.055	3.927	3.702	3.12
4.06	6.8	7.893	5.598	5.115	4.113	3.695	2.99
4.07	6.6	6.948	5.472	4.795	4.034	3.665	3.29
4.08	6.84	7.38	5.436	4.92	4.086	3.589	3.11
4.09	6.728	7.776	5.508	4.63	4.142	3.684	2.77
4.1	6.784	7.812	5.562	5.23	4.119	3.68	3.72
4.11	7.04	7.839	5.571	4.9	4.011	3.623	2.71
4.12	6.888	7.659	5.778	5.315	4.069	3.641	2.75
4.13	6.4	8.082	5.517	5.115	4.095	3.67	2.98
4.14	6.448	8.64	5.697	5.035	4.223	3.665	3.11
4.15	6.456	8.118	5.445	4.98	4.02	3.639	3.06
4.16	6.464	8.622	5.958	5.38	4.072	3.628	2.74
4.17	6.44	7.785	5.472	5.1	4.051	3.734	3.68
4.18	6.352	8.073	5.616	5.205	4.038	3.61	2.88
4.19	6.624	8.649	5.778	5.205	3.969	3.603	3.28
4.2	6.68	7.533	5.688	4.975	3.982	3.666	2.97
4.21	6.664	8.1	5.922	4.865	4.074	3.712	2.74
4.22	6.128	7.938	5.949	4.695	4.115	3.672	2.79
4.23	7.08	7.731	5.697	4.88	4.03	3.636	2.79
4.24	6.792	8.334	5.229	5.26	3.944	3.659	2.71
4.25	6.28	8.37	5.301	4.78	3.991	3.681	2.8
4.26	5.96	8.406	5.409	5.105	3.934	3.642	5.52
4.27	6.264	8.379	5.418	5.1	3.95	3.657	4.66
4.28	5.92	9.216	5.301	5.055	3.911	3.674	2.8
4.29	6.936	9.162	5.562	5.14	4.041	3.66	2.75
4.3	6.064	8.91	5.697	5.295	4.014	3.698	2.99
4.31	6.4	9.306	5.283	5.015	4.106	3.764	3.43
4.32	6.096	8.982	5.409	5.305	3.97	3.736	3.55
4.33	6.816	8.487	5.301	4.85	4.02	3.738	2.91
4.34	6.568	8.748	5.22	5.36	4.029	3.698	2.94
4.35	6.808	8.541	5.562	4.785	3.933	3.621	3
4.36	6.512	8.766	4.986	5.36	4.002	3.598	3.15
4.37	6.744	8.928	5.229	5.48	4.052	3.648	2.85
4.38	6.928	8.334	5.508	5.135	4.146	3.632	2.85
4.39	6.824	8.568	5.175	5.555	4.261	3.891	2.97
4.4	7.104	8.478	5.49	5.055	4.084	3.61	3.25
4.41	7.152	8.001	5.607	5.62	4.069	3.632	2.75
4.42	6.312	8.064	5.769	5.09	4.002	3.608	2.97
4.43	6.88	8.046	5.382	5.06	4.107	3.697	3.07
4.44	7.28	9.279	5.652	5.03	4.26	3.782	2.77
4.45	6.912	8.406	5.4	4.87	4.158	3.685	2.83
4.46	6.088	7.893	5.301	5.26	4.099	3.716	2.89
4.47	7.144	9.369	5.184	5.365	4.04	3.673	3.07
4.48	7.024	8.604	5.112	5.085	4.027	3.758	2.87
4.49	6.456	9.315	5.13	5.26	4.03	3.639	2.94
4.5	6.256	7.866	5.499	4.66	4.153	3.681	3.32
4.51	7.52	8.127	5.112	4.83	4.148	3.646	3.45
4.52	6.6	8.397	5.553	4.605	4.137	3.608	2.76
4.53	7.08	7.956	5.373	4.9	4.173	3.611	3.01
4.54	7.016	8.37	5.445	4.91	4.128	3.637	3.01
4.55	7.728	7.902	5.247	4.895	4.046	3.64	2.78
4.56	7.12	8.946	4.968	4.96	4.08	3.608	2.91
4.57	6.576	8.658	4.941	4.83	4.118	3.656	3.08
4.58	7.048	7.929	5.139	5.285	4.096	3.598	2.81
4.59	6.824	8.235	5.706	4.93	4.086	3.633	3.2
4.6	6.848	8.856	4.86	5.075	4.116	3.622	4.56
4.61	6.728	8.217	5.058	5.225	4.2	3.694	3.13
4.62	5.888	8.298	5.463	5.11	4.185	3.702	3.36
4.63	6.312	8.622	5.346	5.21	4.083	3.636	2.97
4.64	6.248	8.289	5.328	5.155	4.11	3.683	2.82
4.65	5.76	8.82	5.436	4.845	4.102	3.684	3.1
4.66	6.416	8.28	5.526	5.035	4.149	3.702	2.74
4.67	6.024	8.001	5.553	4.96	4.174	3.684	3.16
4.68	5.992	8.253	5.112	5.095	4.047	3.631	3
4.69	5.392	8.793	5.607	5.015	4.213	3.693	3.15
4.7	6.76	8.388	5.58	4.845	4.105	3.63	3.25
4.71	6.368	9.423	5.544	5.4	4.112	3.769	2.91
4.72	5.976	8.388	5.778	5.035	4.06	3.697	2.9
4.73	6.76	8.847	5.409	5.305	4.11	3.643	2.79
4.74	6.808	8.019	5.238	4.99	4.06	3.677	2.77
4.75	6.616	8.244	5.634	4.94	4.025	3.612	3.81
4.76	6.544	8.982	5.292	5.07	3.92	3.628	3.18
4.77	5.68	9.135	4.968	5.42	3.981	3.589	2.75
4.78	6.912	8.415	5.373	5.1	4.032	3.705	2.92
4.79	6.976	8.109	5.697	5.3	3.995	3.631	3.23
4.8	6.128	8.694	5.373	5.105	4.132	3.687	2.63
4.81	6.352	9.252	5.517	5.22	4.024	3.561	3.75
4.82	6.224	8.784	5.319	5.615	4.051	3.643	3.05
4.83	6.68	8.055	4.698	4.93	4.022	3.68	2.85
4.84	6.392	8.253	5.508	5.01	4.118	3.737	3.28
4.85	6.368	8.244	5.031	5.115	4.035	3.73	2.73
4.86	5.784	8.271	5.022	5.42	4.038	3.677	3.79
4.87	5.776	7.938	5.211	4.8	3.993	3.656	3.28
4.88	6.064	8.658	5.211	5.185	4.135	3.646	4.11
4.89	5.816	8.694	5.823	5.075	4.061	3.608	3.14
4.9	5.92	8.622	5.364	5.37	3.941	3.616	2.63
4.91	6.064	8.712	5.31	5.26	4.097	3.642	2.91
4.92	6.256	8.847	5.526	5.59	4.175	3.686	3.28
4.93	6.4	8.811	5.211	5.61	4.024	3.638	2.98
4.94	6.416	8.451	5.409	5.275	4.069	3.653	3.07
4.95	7.04	8.568	5.346	5.42	4.119	3.679	3
4.96	6	8.532	5.283	5.175	4.036	3.7	2.86
4.97	6.16	8.919	5.202	5.17	4.162	3.719	3.1
4.98	6.232	8.271	5.184	5.165	4.207	3.78	2.79
4.99	6.808	8.973	5.886	4.97	4.204	3.851	3.08
5	6.584	8.694	5.373	5.94	4.193	3.848	2.9
5.01	6.088	8.991	5.139	5.56	4.1	3.626	2.93
5.02	6.344	8.424	5.31	5.565	4.023	3.711	3.42
5.03	6.424	8.829	5.607	5.355	3.874	3.582	3.84
5.04	6.52	8.397	5.643	5.5	4.147	3.702	2.72
5.05	6.312	9.153	5.49	5.635	4.152	3.682	2.79
5.06	6.328	8.892	4.959	5.135	4.223	3.707	3.06
5.07	6.76	9.342	5.076	5.365	4.229	3.611	3.07
5.08	5.712	8.829	5.409	5.11	4.045	3.709	3.15
5.09	6.424	9.45	5.319	5.445	4.085	3.655	2.98
5.1	6.16	9.189	5.067	5.595	4.114	3.697	2.87
5.11	6.504	8.28	4.743	5.635	4.131	3.691	2.99
5.12	6.072	9.198	5.589	5.35	4.14	3.735	3.01
5.13	6.312	8.937	5.643	5.72	4.002	3.621	2.8
5.14	6.512	8.946	5.112	5.375	4.071	3.675	2.99
5.15	6.672	9.207	5.337	5.54	4.136	3.619	3.28
5.16	6.184	9.297	5.103	5.7	4.104	3.629	2.81
5.17	6.792	8.55	5.382	5.23	4.279	3.739	3.05
5.18	6.808	9.153	5.274	5.64	4.165	3.67	2.96
5.19	6.544	9.351	5.346	5.82	4.171	3.663	2.62
5.2	6.48	8.883	5.139	5.425	4.228	3.754	3.06
5.21	6.568	8.874	5.382	5.895	4.162	3.67	2.94
5.22	7.192	9.135	5.895	5.45	4.036	3.703	3.14
5.23	6.528	8.631	5.229	5.415	4.012	3.696	2.91
5.24	6.192	8.46	5.967	5.495	3.966	3.624	2.87
5.25	6.76	8.01	5.013	5.535	4.042	3.657	3.56
5.26	6.384	7.686	5.463	5.35	4.007	3.641	2.86
5.27	6.352	7.929	5.436	5.155	4.108	3.663	2.88
5.28	7.064	9.342	5.373	5.645	4.008	3.642	2.96
5.29	7.384	8.847	4.86	5.38	3.981	3.682	3.1
5.3	6.808	8.748	5.103	5.315	4.039	3.589	2.79
5.31	7.264	8.622	4.716	5.675	4.091	3.75	3.24
5.32	6.904	8.325	5.049	5.275	4.116	3.721	3.06
5.33	6.776	8.667	5.004	5.2	4.107	3.651	2.97
5.34	6.568	8.505	5.085	5.085	4.052	3.682	2.89
5.35	6.64	8.757	5.355	5.085	4.114	3.699	2.78
5.36	6.248	8.172	5.229	5.355	4.09	3.655	2.86
5.37	7.272	8.568	5.436	5.45	4.069	3.68	2.86
5.38	6.336	7.902	5.391	5.18	4.149	3.699	2.93
5.39	7.4	8.235	5.283	5.31	3.954	3.652	2.97
5.4	7.384	8.154	5.211	5.585	4.091	3.758	2.94
5.41	6.816	8.595	4.968	5.38	3.997	3.704	2.85
5.42	6.704	8.64	5.076	5.41	3.919	3.595	2.68
5.43	7.12	8.874	5.031	5.675	3.975	3.617	2.71
5.44	6.48	7.461	5.625	5.01	4.112	3.703	2.89
5.45	6.864	7.857	5.679	5.77	4.099	3.693	3.03
5.46	6.384	7.803	5.166	5.325	4.13	3.707	2.87
5.47	5.936	8.568	5.418	5.645	3.956	3.63	2.94
5.48	6.36	8.199	5.733	5.69	4.073	3.692	3.15
5.49	6.96	8.1	5.301	5.605	4.135	3.653	2.77
5.5	7.064	9.252	5.625	5.725	4.202	3.797	4.36
5.51	7.048	9.477	5.148	5.11	4.059	3.612	2.87
5.52	6.952	9.036	5.076	5.245	4.075	3.646	3.12
5.53	6.256	8.766	5.337	5.59	4.069	3.696	2.92
5.54	6.456	8.514	5.103	5.02	4.008	3.651	2.78
5.55	6.304	8.145	5.085	5.045	4.136	3.724	2.84
5.56	6	8.721	5.184	5.66	4.167	3.815	2.94
5.57	5.944	8.172	4.923	5.355	4.11	3.662	2.87
5.58	5.912	9.036	5.175	5.26	4.019	3.577	2.79
5.59	6.368	8.73	5.337	5.59	4.192	3.72	2.95
5.6	5.448	9.342	5.094	5.555	4.14	3.691	3.08
5.61	6.272	8.55	5.067	5.24	4.051	3.618	2.73
5.62	6.6	8.199	5.13	5.5	4.062	3.695	3.02
5.63	6.696	8.487	5.058	5.345	4.063	3.632	3.3
5.64	6.424	9.054	5.355	5.595	4.017	3.707	2.83
5.65	6.608	8.91	4.95	5.565	3.873	3.547	2.83
5.66	6.608	8.766	4.959	5.375	4.14	3.666	2.82
5.67	6.272	8.694	5.301	5.165	4.072	3.685	3.19
5.68	6.168	8.325	5.436	5.46	4.07	3.631	2.83
5.69	5.656	9.063	5.274	5.49	4.01	3.644	3.34
5.7	6.128	8.604	4.95	5.85	4.074	3.651	2.79
5.71	6.256	8.226	5.013	5.455	4.123	3.699	2.85
5.72	6.648	8.451	4.788	5.235	4.109	3.679	2.78
5.73	6.672	7.929	5.256	5.415	4.18	3.688	2.79
5.74	6.768	7.632	5.175	5.42	4.149	3.701	2.89
5.75	6.896	8.397	5.292	4.915	4.143	3.695	2.77
5.76	6.912	8.469	5.103	5.28	4.119	3.68	2.88
5.77	7.776	7.47	5.139	4.905	3.956	3.689	3.43
5.78	6.712	7.641	5.013	4.855	4.073	3.674	2.56
5.79	6.824	8.073	5.04	5.22	4.203	3.699	2.77
5.8	6.424	8.379	5.535	4.87	4.1	3.687	2.9
5.81	7.4	8.334	5.544	4.655	4.135	3.678	2.97
5.82	7.016	8.253	5.076	5.215	4.041	3.641	3.43
5.83	6.848	7.812	4.968	5.17	3.982	3.63	2.85
5.84	6.512	7.659	4.977	5.185	4.007	3.641	2.8
5.85	6.472	7.632	5.103	5.14	4.131	3.697	3.32
5.86	6.088	8.523	4.797	5.135	4.091	3.683	2.81
5.87	6.232	7.776	5.256	5.465	4.01	3.626	2.9
5.88	6.224	7.515	5.31	4.815	4.058	3.681	3.31
5.89	5.984	7.803	5.076	5.24	4.064	3.641	3.17
5.9	6.304	7.848	5.085	5.26	4.07	3.628	3.48
5.91	6.544	7.263	4.869	5.425	4.076	3.695	2.95
5.92	6.24	7.731	4.995	4.98	4.104	3.731	2.87
5.93	6.632	8.334	4.977	5.215	4.188	3.671	2.73
5.94	6.312	7.974	4.968	5.27	4.092	3.658	2.87
5.95	6.464	8.325	4.995	5.625	4.168	3.673	2.91
5.96	7.08	7.911	5.382	5.415	4.251	3.754	2.73
5.97	7.104	7.893	4.95	5.175	4.159	3.742	2.78
5.98	6.592	7.884	5.463	5.205	4.245	3.723	3.25
5.99	7.088	7.299	4.869	4.91	4.174	3.735	2.97
6	6.584	7.623	5.31	4.625	4.195	3.66	2.82
6.01	6.296	8.226	5.382	4.735	4.149	3.661	2.9
6.02	6.44	7.263	5.436	4.635	4.17	3.696	3.06
6.03	6.512	7.812	5.022	4.885	4.012	3.607	2.76
6.04	7.112	7.542	5.031	4.58	4.215	3.713	3.25
6.05	7.688	7.902	5.31	5.08	4.175	3.711	2.98
6.06	6.784	7.524	5.103	4.43	4.098	3.617	2.83
6.07	6.84	7.632	5.166	5.045	3.989	3.619	2.9
6.08	6.808	7.479	5.148	4.87	4.054	3.685	2.94
6.09	7.392	7.2	5.112	4.705	4.057	3.673	2.72
6.1	6.232	7.137	5.409	4.66	4.016	3.672	3.03
6.11	7.16	7.497	5.364	4.64	4.023	3.695	2.66
6.12	6.736	7.092	4.977	4.38	4.068	3.683	2.89
6.13	7.256	7.2	5.067	4.705	4.069	3.703	3.07
6.14	6.912	6.939	5.31	4.53	4.108	3.69	2.85
6.15	6.824	6.975	5.562	4.495	4.045	3.66	3.44
6.16	6.544	6.687	5.175	4.2	4.051	3.62	3.07
6.17	6.504	7.092	4.986	4.33	4.137	3.77	3.73
6.18	6.24	6.876	5.454	4.42	4.136	3.733	2.9
6.19	6.4	7.38	5.112	4.23	3.94	3.686	3.67
6.2	6.248	6.993	5.13	4.475	3.848	3.564	2.98
6.21	6.952	6.723	5.193	4.555	4.002	3.654	2.96
6.22	6.704	6.813	5.085	4.695	4.004	3.792	2.57
6.23	6.864	6.435	5.4	4.59	4.168	3.713	3.14
6.24	7.664	7.281	5.481	4.305	4.189	3.707	3.03
6.25	7.536	7.038	5.229	4.68	4.167	3.696	3.2
6.26	6.088	6.66	5.274	4.67	4.139	3.709	3.5
6.27	5.912	6.921	5.4	4.655	4.211	3.724	2.96
6.28	6.352	6.669	5.193	4.22	4.165	3.722	3.1
6.29	6.888	7.299	5.391	4.545	4.173	3.645	2.64
6.3	6.976	6.732	5.292	4.495	4.179	3.611	2.83
6.31	6.888	6.768	5.238	4.57	4.128	3.638	3.23
6.32	6.752	6.768	5.211	4.6	4.256	3.737	3.09
6.33	7.128	7.011	5.184	4.655	4.261	3.774	3.06
6.34	6.672	6.489	5.508	4.135	4.204	3.701	3.27
6.35	7.024	6.696	5.553	4.61	4.167	3.729	3.57
6.36	7.448	7.164	5.589	4.39	4.011	3.664	2.77
6.37	7.152	6.282	5.292	4.185	4.149	3.682	2.95
6.38	7.032	6.885	5.193	4.18	4.026	3.698	2.95
6.39	6.552	7.254	5.382	4.02	4.166	3.687	2.96
6.4	6.68	6.93	5.067	4.335	4.129	3.659	3.01
6.41	6.64	7.389	5.328	4.485	4.152	3.742	3.41
6.42	6.928	6.921	5.382	4.07	3.963	3.68	2.84
6.43	6.392	6.75	5.22	4.095	4.114	3.721	3.73
6.44	6.568	7.452	5.184	4.62	4.081	3.633	2.75
6.45	6.136	6.921	5.256	4.355	4.079	3.637	2.78
6.46	6.832	7.317	5.049	4.35	3.97	3.679	3.14
6.47	6.288	7.2	5.346	3.91	4.041	3.659	3.03
6.48	6.632	7.038	5.175	4.25	4.211	3.747	3.04
6.49	6.344	6.804	5.4	3.995	4.24	3.717	3.11
6.5	6.72	6.84	5.382	4.075	4.149	3.63	2.66
6.51	6.272	7.209	5.211	4.55	4.043	3.641	3.09
6.52	6.16	6.651	5.373	4.21	4.024	3.672	3.14
6.53	6.16	6.822	4.797	3.97	4.087	3.665	2.68
6.54	6.424	7.101	5.445	4.275	4.012	3.621	3.13
6.55	6.288	6.831	5.256	4.23	4.105	3.648	3.21
6.56	6.608	6.813	5.148	4.245	4.133	3.662	2.95
6.57	6.36	7.281	5.148	4.43	4.133	3.728	2.8
6.58	6.184	7.182	4.914	4.59	4.047	3.631	3
6.59	6.592	7.335	4.959	4.685	4.05	3.662	2.96
6.6	6.448	6.3	5.22	4.48	4.131	3.693	3.19
6.61	6.424	7.029	5.292	4.525	4.142	3.663	2.76
6.62	6.536	6.759	5.031	4.325	4.108	3.624	2.77
6.63	6.808	7.992	5.382	4.7	4.124	3.732	3.11
6.64	6.272	6.849	5.058	4.72	4.077	3.668	3.08
6.65	6.568	7.389	5.445	4.58	4.063	3.697	2.76
6.66	7.248	7.479	5.256	4.815	3.998	3.693	2.96
6.67	6.984	6.912	5.373	4.85	4.071	3.685	2.84
6.68	6.424	6.525	5.085	4.365	4.089	3.717	2.85
6.69	6.848	6.777	5.184	4.395	3.955	3.652	2.96
6.7	6.36	6.687	5.067	4.525	4.104	3.746	3.3
6.71	6.576	7.047	5.319	4.425	4.098	3.653	4.12
6.72	6.216	6.93	5.292	4.25	4.193	3.651	2.92
6.73	6.256	7.155	5.076	4.52	4.107	3.683	2.91
6.74	6.296	7.335	5.058	4.355	4.166	3.722	3.21
6.75	6.352	6.768	5.391	4.44	3.97	3.612	3.01
6.76	6.552	7.119	5.067	4.63	4.131	3.605	2.94
6.77	6.76	7.128	5.337	4.535	4.142	3.69	2.96
6.78	6.464	6.966	5.553	4.235	3.961	3.653	2.62
6.79	6.712	7.191	5.076	4.825	4.026	3.696	2.87
6.8	6.024	7.254	5.283	4.685	3.953	3.688	2.74
6.81	7.04	7.515	5.346	4.69	3.98	3.66	2.79
6.82	5.792	7.164	5.265	4.66	3.947	3.723	2.96
6.83	5.496	6.975	5.103	4.46	3.952	3.672	2.72
6.84	5.824	7.443	5.328	4.55	3.974	3.633	2.93
6.85	7.112	6.525	5.472	4.24	3.972	3.647	3.12
6.86	7.088	7.299	5.688	4.555	3.892	3.639	3.11
6.87	6.704	7.533	5.427	4.505	4.048	3.674	2.75
6.88	6.32	7.047	5.481	4.34	4.02	3.711	3.04
6.89	6.184	7.407	5.373	4.51	4.051	3.642	2.86
6.9	5.96	6.741	5.256	4.245	4.003	3.586	2.79
6.91	5.56	6.975	5.148	4.625	4.07	3.638	2.98
6.92	6.232	7.227	5.229	4.405	4.057	3.785	2.7
6.93	6.488	6.867	4.842	4.28	4.053	3.58	2.88
6.94	6.208	6.912	5.157	4.31	4.011	3.698	2.84
6.95	7.16	6.777	5.202	4.275	3.92	3.65	3.2
6.96	7.152	6.93	5.445	4.4	3.955	3.691	2.75
6.97	6.688	6.912	5.4	4.215	4.002	3.711	3.41
6.98	6.576	7.173	5.382	4.48	3.848	3.661	2.76
6.99	6.256	6.696	5.472	4.01	3.945	3.699	2.81
7	7.376	7.074	5.517	4.7	3.961	3.712	2.95
7.01	6.544	6.912	5.274	4.505	3.91	3.725	2.81
7.02	6.328	7.137	5.166	4.38	4.056	3.636	3
7.03	6.192	6.903	5.229	4.51	4.025	3.626	2.98
7.04	7.224	6.705	5.391	4.135	3.969	3.666	3.26
7.05	6.92	7.002	5.571	4.235	3.91	3.621	3.2
7.06	6.152	6.534	5.868	4.415	3.968	3.641	3.08
7.07	7.08	6.822	5.229	4.36	4.023	3.599	3.16
7.08	6.824	7.632	4.932	4.655	4.116	3.73	3.43
7.09	6.168	6.399	5.544	4.42	4.061	3.665	3.01
7.1	6.936	7.425	5.175	4.625	4.026	3.578	3.03
7.11	6.784	6.741	5.436	4.735	3.969	3.647	3.07
7.12	7.056	7.173	5.148	4.455	3.985	3.606	3.47
7.13	7.168	7.38	5.193	4.66	3.929	3.615	2.77
7.14	6.8	7.389	5.985	4.435	4.017	3.742	2.83
7.15	6.608	6.795	5.517	4.095	4.012	3.638	3.14
7.16	6.664	6.759	5.076	4.15	4.045	3.634	3.53
7.17	6.416	7.542	5.499	4.575	3.957	3.625	3.24
7.18	7.12	7.803	5.607	4.69	4.017	3.642	3.42
7.19	6.864	6.462	5.985	4.38	4.053	3.674	2.83
7.2	6.616	7.38	5.562	4.665	3.982	3.634	2.84
7.21	6.216	6.903	5.157	4.72	4.053	3.657	3.62
7.22	6.56	6.921	5.328	4.09	3.991	3.675	2.8
7.23	6.84	7.074	5.139	4.325	3.959	3.66	2.84
7.24	6.368	6.921	5.4	4.05	3.818	3.636	2.79
7.25	5.864	7.137	5.22	4.07	3.859	3.596	2.92
7.26	6.168	7.056	5.445	4.445	3.913	3.651	2.91
7.27	6.352	7.38	5.688	4.34	4.011	3.561	3.01
7.28	6.112	7.164	5.436	4.245	3.971	3.623	2.98
7.29	6.112	7.434	5.544	4.21	4.028	3.677	2.9
7.3	6.64	7.308	5.112	4.275	3.998	3.662	2.77
7.31	6.448	7.353	5.94	4.4	3.988	3.601	2.92
7.32	5.896	7.686	5.346	4.585	3.972	3.651	2.93
7.33	6.104	6.984	5.553	4.66	4.003	3.675	2.81
7.34	6.056	6.489	5.805	4.32	4.045	3.665	4.82
7.35	5.904	7.335	5.328	4.58	4.137	3.723	2.91
7.36	6.928	7.002	5.337	4.645	4.086	3.709	2.96
7.37	6.168	7.947	5.436	4.49	4.089	3.692	3.08
7.38	7.136	7.11	5.202	4.265	4.035	3.619	3.26
7.39	6.696	6.705	5.409	4.795	4.046	3.64	2.83
7.4	7.36	6.759	5.355	4.39	4.081	3.665	2.73
7.41	6.392	7.56	5.67	4.91	4.119	3.654	2.8
7.42	5.888	6.876	5.373	4.175	3.991	3.596	3.05
7.43	6.528	7.767	5.571	4.74	4.014	3.644	3.7
7.44	6.84	7.272	5.481	4.545	3.953	3.663	5.03
7.45	7.144	7.083	5.328	4.1	4.113	3.655	2.78
7.46	7.2	7.245	5.526	4.31	4.154	3.703	2.95
7.47	7.032	7.722	5.769	4.855	4.1	3.694	3.02
7.48	6.984	7.722	5.319	4.39	3.977	3.55	2.89
7.49	7.432	7.308	5.634	4.695	4.015	3.665	2.91
7.5	7.416	7.542	5.742	4.595	4.088	3.682	3.37
7.51	6	6.921	5.859	4.535	4.04	3.628	2.76
7.52	6.392	7.083	5.544	4.265	3.97	3.603	3.29
7.53	6.784	7.65	5.364	4.64	4.067	3.673	2.88
7.54	7.448	7.524	5.409	4.325	4.036	3.724	2.69
7.55	6.536	7.344	5.139	4.525	4.079	3.741	3.12
7.56	7.456	7.749	5.472	4.61	3.962	3.603	2.76
7.57	6.672	7.272	5.22	4.445	4.068	3.646	2.9
7.58	7.24	8.01	5.643	4.385	4.176	3.703	3.2
7.59	7.048	7.839	5.679	4.7	4.11	3.712	2.91
7.6	7.104	7.245	5.877	4.59	4.146	3.682	2.88
7.61	6.808	7.092	5.886	4.395	4.054	3.69	3.23
7.62	7.224	7.92	5.445	4.35	4.046	3.693	3.39
7.63	7.4	7.605	5.265	4.29	4.075	3.664	3
7.64	6.528	6.984	5.085	4.63	4.107	3.669	2.9
7.65	6.224	7.983	5.499	4.52	4.229	3.776	2.96
7.66	5.968	7.632	5.661	4.52	4.11	3.642	2.89
7.67	6.44	7.362	5.301	4.4	4.048	3.74	2.94
7.68	6.384	7.164	5.157	4.34	4.102	3.634	3.01
7.69	6.552	7.362	4.959	4.655	4.214	3.622	2.76
7.7	6.008	7.056	5.589	4.24	4.136	3.641	2.63
7.71	6.256	6.813	5.562	4.68	4.134	3.634	2.78
7.72	6.608	7.902	5.823	4.335	4.03	3.664	2.78
7.73	6.88	7.11	5.373	4.23	3.893	3.654	2.83
7.74	6.216	7.398	5.346	4.635	3.924	3.607	2.75
7.75	6.568	7.812	5.823	4.615	3.983	3.669	2.92
7.76	6.496	7.497	5.301	4.605	4.009	3.691	2.9
7.77	6.584	7.83	5.328	4.63	3.928	3.611	3.21
7.78	6.704	8.325	5.949	4.505	4.045	3.635	2.63
7.79	6.616	8.226	5.625	4.475	4.083	3.676	2.82
7.8	6.24	7.65	5.382	4.28	4.042	3.711	2.7
7.81	6.264	8.397	5.652	4.53	3.877	3.634	2.82
7.82	6.424	7.497	5.508	4.66	4.041	3.656	2.9
7.83	6.104	7.182	5.337	4.505	3.93	3.629	2.67
7.84	6.112	7.785	5.184	4.585	4.06	3.652	2.97
7.85	6.616	7.11	5.427	4.38	3.981	3.609	2.82
7.86	6.808	7.659	5.256	4.52	4.038	3.631	2.76
7.87	7.024	7.704	5.571	4.585	4.085	3.686	3.02
7.88	6.472	7.254	5.526	4.455	3.886	3.623	2.81
7.89	7.448	7.794	5.436	4.405	4.175	3.717	3.84
7.9	6.624	8.262	4.977	4.895	4.131	3.726	3.12
7.91	7.544	7.767	5.265	4.87	4.109	3.644	2.96
7.92	6.832	8.109	5.193	4.5	4.005	3.64	2.97
7.93	6.408	8.19	5.679	4.41	3.946	3.672	2.77
7.94	6.656	7.479	5.103	4.55	3.895	3.64	2.79
7.95	6.592	7.857	5.175	4.775	4.006	3.641	2.82
7.96	6.608	8.028	5.112	4.68	4.03	3.653	2.89
7.97	7.4	7.965	5.157	4.475	3.804	3.673	2.67
7.98	6.68	7.677	5.04	4.805	3.918	3.687	2.75
7.99	6.72	7.155	5.634	4.775	4.013	3.688	2.89
8	7.064	7.362	5.328	4.73	4.016	3.637	3.37
8.01	6.304	7.713	5.49	4.805	3.931	3.622	2.84
8.02	6.552	7.983	5.265	4.77	3.999	3.577	3.13
8.03	5.8	7.461	5.256	4.455	4.035	3.609	2.77
8.04	5.672	8.01	5.256	5.23	4.001	3.752	2.97
8.05	5.68	8.118	5.166	4.815	4.046	3.592	3.02
8.06	5.968	7.407	5.256	4.62	4.026	3.613	2.86
8.07	6.728	7.524	5.049	4.785	4.111	3.683	2.69
8.08	6.464	7.542	5.571	4.64	4.025	3.678	3.23
8.09	6.84	6.885	5.517	4.415	4.054	3.687	2.83
8.1	6.296	8.046	5.238	4.74	4.035	3.658	2.91
8.11	6.112	7.695	5.634	4.36	3.988	3.637	2.94
8.12	6.032	7.803	5.769	4.285	4.145	3.729	3.07
8.13	6.248	7.434	5.292	4.315	4.004	3.606	2.85
8.14	6.512	7.389	5.247	4.54	4.048	3.633	2.66
8.15	6.536	7.731	5.571	4.51	3.957	3.657	2.81
8.16	6.04	7.164	5.247	4.63	3.837	3.657	3.07
8.17	5.896	7.461	5.355	4.455	3.957	3.68	2.91
8.18	6.744	7.182	5.382	4.28	4.008	3.703	2.67
8.19	6.48	7.11	5.193	4.445	4	3.698	3.14
8.2	6.728	7.335	5.382	4.305	4.072	3.676	3.19
8.21	6.12	7.083	5.598	4.375	3.973	3.773	5.19
8.22	6.872	7.389	5.427	4.38	4.032	3.744	3
8.23	6.416	7.704	5.535	4.61	3.965	3.541	2.67
8.24	6.736	7.389	5.364	4.515	4.047	3.721	2.91
8.25	6.448	7.488	4.995	4.66	4.034	3.702	2.8
8.26	6.584	7.317	5.175	4.32	4.006	3.705	3.27
8.27	6.432	7.389	5.256	4.42	4.014	3.733	2.89
8.28	6.704	6.948	5.058	4.485	3.952	3.633	2.93
8.29	6.512	7.749	5.427	4.53	4.131	3.717	2.91
8.3	6.632	7.326	5.256	4.595	3.975	3.632	2.74
8.31	6.232	7.551	5.175	4.48	4.074	3.686	2.73
8.32	6.352	7.2	5.391	4.63	4.096	3.683	2.99
8.33	6.576	6.939	5.454	4.42	4.03	3.604	2.98
8.34	5.6	6.948	5.67	4.665	4.068	3.708	2.84
8.35	6.192	7.326	5.418	4.325	3.993	3.803	2.96
8.36	5.888	7.785	5.985	4.31	3.988	3.68	3.1
8.37	6.336	7.56	5.364	4.6	4.076	3.64	3.02
8.38	6.592	7.308	5.076	4.71	3.958	3.623	3.13
8.39	6.664	7.623	5.283	4.895	4.026	3.693	3.01
8.4	5.728	7.272	5.895	4.285	4.066	3.738	3.14
8.41	6.512	7.146	5.058	4.86	4.029	3.607	2.88
8.42	5.92	7.641	5.751	3.9	3.852	3.638	3.63
8.43	6.144	6.777	5.346	4.425	4.093	3.684	3.24
8.44	6.12	6.876	5.76	4.67	4.029	3.621	2.88
8.45	6.552	7.272	5.229	4.405	4.104	3.699	2.9
8.46	6.752	7.317	5.454	4.64	3.952	3.685	2.77
8.47	6.28	6.66	5.121	4.515	3.919	3.649	3
8.48	6.696	6.849	5.166	4.375	3.809	3.658	2.98
8.49	5.904	7.083	5.562	4.35	3.831	3.649	2.74
8.5	6.312	7.362	5.751	4.625	3.999	3.594	3.02
8.51	6.56	7.452	5.715	4.345	3.953	3.565	2.88
8.52	6.528	7.353	5.688	4.525	4.081	3.668	2.98
8.53	6.424	7.47	6.291	4.605	3.926	3.675	2.94
8.54	6.192	6.948	5.472	4.475	3.998	3.649	2.77
8.55	6.36	7.398	5.796	4.605	4.204	3.735	2.89
8.56	6.832	7.641	5.778	4.7	4.11	3.602	2.92
8.57	6.784	7.317	5.346	4.545	4.118	3.67	2.84
8.58	6.68	7.308	5.238	4.275	4.137	3.854	2.96
8.59	6.76	7.137	5.328	4.545	4.157	3.832	2.9
8.6	6.52	7.101	5.814	4.6	4.125	3.679	2.75
8.61	6.712	7.092	5.778	4.505	4.175	3.767	2.83
8.62	6.888	7.686	5.166	4.82	4.163	3.678	2.78
8.63	6.08	6.849	5.634	4.525	4.183	3.806	2.94
8.64	6.408	7.866	5.643	4.52	4.237	3.824	2.8
8.65	5.36	7.821	5.319	4.245	4.171	3.873	2.88
8.66	5.984	7.506	5.373	4.12	4.139	3.792	3.55
8.67	6.44	7.371	5.481	4.58	4.183	3.711	2.96
8.68	5.968	7.668	5.472	4.615	4.144	3.809	2.91
8.69	6.392	7.983	5.049	4.53	4.159	3.812	2.74
8.7	6.36	6.876	5.175	4.49	4.169	3.814	2.87
8.71	6.4	7.362	5.463	4.345	4.215	3.813	2.93
8.72	6.048	7.02	5.787	4.24	4.129	3.695	2.81
8.73	6.904	7.434	5.859	4.45	4.201	3.669	2.93
8.74	6.568	6.912	5.679	3.89	4.193	3.677	2.84
8.75	6.872	7.263	5.499	4.485	4.213	3.775	2.85
8.76	6.352	7.407	5.625	5.2	4.133	3.792	3.09
8.77	6.856	7.146	5.022	4.52	4.213	3.855	2.87
8.78	7.4	7.569	5.373	4.515	4.13	3.888	2.79
8.79	6.808	7.722	4.968	4.725	4.223	3.817	2.91
8.8	6.792	7.011	5.301	4.74	4.194	3.774	2.71
8.81	7.352	6.804	5.427	4.615	4.176	3.788	2.76
8.82	7.352	7.731	5.634	4.985	4.206	3.788	2.94
8.83	7.224	8.073	5.166	5.325	4.195	3.839	3.27
8.84	7.112	6.885	5.328	4.645	4.112	3.742	2.71
8.85	7.424	7.65	5.607	4.625	4.233	3.818	2.82
8.86	7.232	7.506	5.769	4.42	4.23	3.85	2.83
8.87	6.288	7.596	5.292	5.045	4.201	3.761	2.82
8.88	6.8	7.515	5.364	4.845	4.093	3.823	3.01
8.89	6.584	7.479	5.553	4.245	4.181	3.861	2.85
8.9	6.752	7.236	4.968	4.86	4.208	3.888	2.74
8.91	6.384	7.668	5.238	4.405	4.21	3.826	2.79
8.92	6.584	7.551	5.274	4.91	4.222	3.858	3.01
8.93	6.544	7.704	5.418	4.535	4.186	3.844	3.21
8.94	6.552	7.299	5.544	4.545	4.156	3.851	3.08
8.95	6.44	7.704	5.994	4.95	4.137	3.864	3.28
8.96	6.664	7.596	4.851	4.97	4.232	3.886	3.13
8.97	6.336	7.659	5.301	4.47	4.166	3.833	2.78
8.98	6.624	7.38	5.328	4.64	4.14	3.887	2.86
8.99	6.944	8.208	5.787	4.915	4.35	3.906	3.05
9	6.096	7.704	5.715	4.29	4.151	3.858	2.84
9.01	6.352	7.254	5.616	4.65	4.184	3.808	2.72
9.02	6.744	7.587	5.751	4.575	4.114	3.856	2.83
9.03	6.384	7.2	5.706	4.29	4.12	3.839	2.81
9.04	6	7.506	5.175	4.85	4.255	3.815	2.77
9.05	6.456	7.461	5.328	4.88	4.274	3.858	2.81
9.06	6.312	7.362	5.481	4.755	4.218	3.749	2.96
9.07	6.392	7.416	5.337	4.365	4.211	3.84	2.97
9.08	6.392	7.155	5.445	4.06	4.163	3.821	3.32
9.09	6.192	6.975	5.193	4.545	4.27	3.826	2.71
9.1	6.544	7.137	6.048	4.845	4.295	3.767	3.55
9.11	6.376	7.254	5.679	4.345	4.232	3.894	3.12
9.12	6.8	7.128	5.715	4.605	4.253	3.87	2.93
9.13	6.16	7.218	5.535	4.68	4.268	3.797	2.86
9.14	6.728	7.434	5.454	4.725	4.164	3.797	2.93
9.15	6.592	7.713	5.526	5.17	4.186	3.783	3.23
9.16	6.624	7.371	5.346	5.01	4.204	3.926	2.91
9.17	6.608	6.795	5.202	5.275	4.207	3.779	2.85
9.18	6.192	7.245	5.4	4.41	4.294	3.902	3.14
9.19	6.416	7.704	5.706	4.785	4.169	3.806	3.58
9.2	6.656	7.236	5.085	4.575	4.2	3.834	2.85
9.21	6.184	7.668	5.454	4.85	4.135	3.869	2.92
9.22	6.472	7.722	5.328	4.44	4.218	3.82	3.19
9.23	6	8.127	5.265	5.05	4.275	3.804	2.69
9.24	5.952	7.623	5.634	4.685	4.222	3.902	2.98
9.25	6.12	7.551	5.355	4.515	4.278	3.845	3.1
9.26	6.176	6.831	4.95	4.495	4.214	3.952	3.29
9.27	5.904	7.083	5.256	4.655	4.171	3.936	3.03
9.28	6.288	7.461	5.274	4.62	4.129	3.821	2.84
9.29	6.616	6.894	5.121	4.345	4.129	3.849	3.06
9.3	6.776	7.65	5.706	4.545	4.185	3.971	3.19
9.31	6.608	7.272	5.535	4.215	4.15	3.76	2.94
9.32	6.72	7.335	5.184	4.54	4.176	3.927	2.73
9.33	6.104	6.966	5.436	4.245	4.249	3.877	2.85
9.34	6.528	6.912	5.4	4.245	4.192	3.842	2.86
9.35	6.76	6.75	5.256	4.27	4.252	3.93	2.8
9.36	5.848	6.705	5.364	4.55	4.267	3.86	2.87
9.37	6.472	7.155	5.742	4.205	4.226	3.911	2.95
9.38	6.312	6.93	5.571	4.305	4.145	3.858	2.87
9.39	6.6	7.452	5.346	4.1	4.271	3.932	3.47
9.4	6.12	7.506	5.598	4.31	4.219	3.918	2.71
9.41	6.328	7.092	5.229	4.29	4.193	3.893	3.14
9.42	6.616	7.065	5.211	4.195	4.232	3.876	2.72
9.43	6.384	7.137	5.571	4.755	4.21	3.901	3.05
9.44	6.144	7.254	5.085	4.31	4.215	3.903	3.46
9.45	7.16	7.119	5.454	4.385	4.151	3.897	2.81
9.46	7.464	7.668	5.148	4.72	4.153	3.834	2.92
9.47	6.6	7.803	5.436	4.21	4.194	3.973	2.9
9.48	6.944	8.226	5.076	4.895	4.216	3.895	2.92
9.49	6.888	7.614	5.589	4.6	4.107	3.824	3.31
9.5	6.496	7.785	5.724	4.515	4.13	3.813	2.84
9.51	7.184	7.596	5.328	4.4	4.194	3.875	3.14
9.52	6.736	7.173	5.184	4.345	4.145	3.758	2.89
9.53	6.04	7.569	5.625	4.6	4.201	3.833	2.87
9.54	6.344	7.794	5.481	4.87	4.127	3.775	2.76
9.55	6.232	7.362	5.256	3.88	4.139	3.859	3.14
9.56	6.24	7.695	5.229	4.955	4.233	3.851	2.92
9.57	5.936	7.38	5.436	4.7	4.215	3.872	4.67
9.58	6.424	8.01	5.634	4.88	4.264	3.798	3
9.59	5.92	7.101	5.598	4.71	4.218	3.861	3.02
9.6	5.928	7.308	5.238	4.515	4.21	3.803	2.96
9.61	5.848	7.11	5.157	4.425	4.178	3.787	2.92
9.62	6.456	7.731	5.193	4.105	4.197	3.802	3.01
9.63	5.688	7.272	5.724	4.22	4.141	3.811	3.16
9.64	6.592	6.858	5.364	4.14	4.141	3.868	2.93
9.65	6.488	6.984	5.454	4.35	4.268	3.854	2.81
9.66	6.096	7.002	5.337	4.215	4.176	3.829	2.93
9.67	5.968	7.515	5.193	4.62	4.238	3.884	3.25
9.68	6.64	7.83	5.31	4.45	4.231	3.902	2.79
9.69	6.28	7.155	5.427	4.26	4.266	3.862	3.4
9.7	6.896	7.362	5.31	5.07	4.227	3.943	3.83
9.71	6.728	7.425	5.859	4.38	4.22	3.825	3.16
9.72	6.88	7.911	5.193	4.68	4.252	3.899	2.89
9.73	7.016	7.326	5.418	4.345	4.135	3.888	2.83
9.74	7.376	7.686	5.409	4.36	4.17	3.933	3.03
9.75	7.096	7.308	5.616	4.13	4.189	3.924	2.93
9.76	7.528	7.047	5.193	4.55	4.242	3.857	3.31
9.77	6.912	7.866	5.427	4.33	4.221	3.913	3.02
9.78	8.08	7.128	5.679	4.905	4.191	3.887	2.99
9.79	8.04	7.614	5.121	4.7	4.23	3.941	2.93
9.8	7.544	7.749	5.013	5.155	4.285	3.905	3.36
9.81	7.832	7.857	5.661	4.24	4.221	3.874	3.63
9.82	7.592	7.65	5.292	4.015	4.307	3.925	3.17
9.83	8.08	8.271	5.607	4.595	4.279	3.851	2.84
9.84	8.112	7.38	5.247	4.865	4.247	3.954	3.14
9.85	7.864	7.416	5.31	4.56	4.273	3.932	2.83
9.86	8.024	7.848	5.508	4.91	4.24	3.923	2.96
9.87	7.52	7.344	5.256	5.01	4.185	3.822	3.03
9.88	7.512	7.281	5.391	4.525	4.159	3.831	2.89
9.89	6.872	7.686	5.49	4.73	4.298	3.919	2.89
9.9	7.392	7.074	5.148	4.135	4.235	3.817	2.89
9.91	7.68	6.957	5.4	4.555	4.244	3.857	2.85
9.92	7.92	6.948	5.616	4.275	4.258	3.842	3.01
9.93	7.424	6.93	5.481	5.015	4.178	3.891	3.43
9.94	7.336	7.173	5.184	4.905	4.21	3.908	2.96
9.95	7.408	7.137	5.103	4.8	4.199	3.916	2.86
9.96	7.248	8.253	5.472	4.88	4.147	3.796	2.97
9.97	7.272	7.209	5.4	4.295	4.19	3.852	3.46
9.98	7.712	7.218	6.066	4.505	4.171	3.866	3.08
9.99	8.056	7.389	5.751	4.535	4.108	3.814	2.91
10	7.688	7.524	5.364	4.35	4.165	3.873	2.98
10.01	7.728	7.173	5.715	4.755	4.178	3.813	2.91
10.02	7.664	7.236	5.454	4.555	4.196	3.818	3.22
10.03	7.424	7.875	5.265	4.64	4.128	3.903	3.61
10.04	8.056	7.47	5.535	4.275	4.17	3.848	2.89
10.05	7.568	7.893	5.382	4.445	4.134	3.863	3.63
10.06	7.6	7.488	5.625	4.175	4.189	3.873	2.97
10.07	7.368	7.002	5.121	4.555	4.224	3.845	2.82
10.08	7.288	6.876	4.995	4.405	4.273	3.867	2.78
10.09	6.456	7.605	5.562	4.395	4.152	3.816	3.15
10.1	7.336	6.975	5.589	4.475	4.17	3.864	3.01
10.11	6.592	7.947	5.436	4.335	4.207	3.849	3.21
10.12	7.312	7.047	5.418	4.65	4.236	3.898	3.1
10.13	6.912	7.65	5.445	4.86	4.183	3.837	2.95
10.14	6.856	7.803	5.679	4.74	4.243	3.851	3.18
10.15	6.624	6.921	5.4	4.625	4.24	3.872	3.01
10.16	6.92	7.416	5.733	4.705	4.234	3.827	3.01
10.17	7.688	7.146	5.265	4.945	4.231	3.853	2.84
10.18	7.776	7.353	5.319	4.69	4.217	3.865	2.89
10.19	7.44	7.524	5.427	4.295	4.123	3.867	3.01
10.2	7.32	7.578	5.328	4.575	4.222	3.807	2.75
10.21	7.368	6.939	5.283	5.11	4.108	3.932	3.1
10.22	7.944	7.956	5.292	4.53	4.237	3.901	2.78
10.23	7.12	7.335	5.364	4.38	4.288	3.921	3.16
10.24	7.56	6.795	5.382	4.46	4.198	3.835	4.06
10.25	7.904	6.993	5.346	4.105	4.217	3.837	3.21
10.26	6.856	6.606	5.778	4.41	4.129	3.877	3.05
10.27	6.776	6.525	5.787	4.41	4.14	3.843	3.08
10.28	6.864	6.687	5.373	4.875	4.199	3.784	2.88
10.29	6.664	7.623	5.337	4.73	4.189	3.875	3.09
10.3	7.44	6.822	5.499	4.5	4.153	3.806	3.04
10.31	7.608	7.506	5.76	4.735	4.181	3.816	2.78
10.32	7.4	7.776	5.418	5.115	4.117	3.826	2.78
10.33	6	7.677	5.553	4.585	4.238	3.856	2.87
10.34	7.656	7.605	5.454	4.825	4.219	3.909	3.21
10.35	7.128	7.299	5.274	4.945	4.222	3.839	2.79
10.36	6.496	6.93	5.427	4.215	4.22	3.898	3.31
10.37	7.096	7.659	5.391	4.495	4.26	3.862	2.86
10.38	7.512	7.389	5.607	4.785	4.294	3.893	3.67
10.39	7.088	7.209	5.769	3.955	4.262	3.821	3.16
10.4	7.304	6.84	5.346	4.9	4.217	3.871	3.13
10.41	7.328	7.353	5.382	4.505	4.311	3.828	2.87
10.42	6.768	7.146	5.652	4.645	4.255	3.87	3.58
10.43	6.984	7.038	5.481	4.615	4.285	3.82	2.75
10.44	7.336	7.155	5.535	4.74	4.262	3.859	2.87
10.45	7.128	7.389	5.886	4.365	4.294	3.879	3.25
10.46	6.76	6.966	5.985	3.96	4.223	3.917	3.42
10.47	7.2	7.128	5.346	4.76	4.268	3.88	2.97
10.48	6.224	6.966	5.598	4.345	4.296	3.838	3.51
10.49	7.088	7.425	5.346	4.54	4.283	3.833	3.51
10.5	7.176	7.578	5.274	4.735	4.231	3.819	2.9
10.51	7.368	8.496	5.22	4.805	4.345	3.974	4.3
10.52	7.448	7.524	5.328	4.365	4.315	3.844	2.86
10.53	7.872	7.155	5.184	4.96	4.252	3.84	2.87
10.54	7.624	7.155	5.274	4.545	4.239	3.859	3.41
10.55	7.256	7.398	5.292	4.58	4.206	3.87	3.42
10.56	7.92	7.443	5.157	4.205	4.233	3.852	2.95
10.57	6.864	8.379	5.418	4.575	4.221	3.863	2.68
10.58	7.064	8.343	5.418	5.145	4.214	3.842	3.08
10.59	7.592	9.252	5.013	4.86	4.273	3.88	3.01
10.6	7.256	8.352	5.319	4.645	4.266	3.876	3.12
10.61	7.576	7.974	5.301	4.405	4.197	3.865	3.95
10.62	7.64	8.127	5.598	4.545	4.312	3.917	3.31
10.63	7.528	8.028	5.211	4.415	4.202	3.76	3.24
10.64	7.536	7.587	4.986	4.795	4.295	3.869	3.4
10.65	7.752	7.965	4.743	4.945	4.247	3.875	3.27
10.66	7.432	7.596	5.193	5.095	4.174	3.858	3.11
10.67	8.288	8.136	5.067	4.945	4.168	3.881	2.97
10.68	7.592	7.281	4.995	5.075	4.206	3.875	3.79
10.69	7.68	7.794	4.878	5.265	4.206	3.852	2.68
10.7	7.632	8.694	5.346	5.075	4.193	3.814	2.81
10.71	7.408	8.055	5.373	4.985	4.231	3.83	3.16
10.72	7.368	7.866	4.797	4.875	4.282	3.866	2.93
10.73	7.728	7.65	5.112	4.79	4.178	3.84	2.85
10.74	7.552	7.857	5.067	5.055	4.175	3.865	3.38
10.75	7.264	7.893	5.121	4.825	4.103	3.794	2.88
10.76	6.992	8.19	4.743	5.43	4.15	3.889	2.87
10.77	7.168	7.218	5.328	5.005	4.11	3.914	5
10.78	7.856	7.488	5.31	4.645	4.093	3.755	2.64
10.79	7.544	7.011	5.121	4.51	4.213	3.861	3.23
10.8	7.208	6.84	5.139	4.415	4.182	3.88	3.01
10.81	7.432	8.289	4.923	4.995	4.159	3.853	2.92
10.82	7.416	7.254	5.193	4.315	4.198	3.766	2.89
10.83	7.336	6.93	5.202	4.675	4.281	3.865	3.18
10.84	6.648	7.155	5.103	4.87	4.155	3.768	2.86
10.85	6.48	7.416	5.229	5.145	4.177	3.793	2.8
10.86	7.48	7.479	5.4	4.725	4.138	3.822	3.08
10.87	7.32	6.786	5.355	4.635	4.191	3.795	2.84
10.88	6.768	7.461	5.256	4.505	4.119	3.856	3.36
10.89	6.848	7.245	5.319	4.38	4.19	3.877	2.97
10.9	7.424	7.317	5.274	4.915	4.244	3.875	2.94
10.91	7.44	6.903	5.085	4.755	4.24	3.83	3.47
10.92	6.032	6.858	5.067	4.77	4.127	3.847	3.1
10.93	6.648	7.092	5.256	4.775	4.138	3.823	3.32
10.94	6.232	6.669	5.229	4.54	4.173	3.832	2.83
10.95	6.192	7.29	5.139	4.69	4.163	3.832	2.94
10.96	6.312	7.227	4.959	4.89	4.152	3.811	3.12
10.97	6.512	7.524	5.445	4.49	4.131	3.82	2.92
10.98	7.168	7.254	5.382	4.875	4.144	3.815	2.98
10.99	7.256	7.227	5.409	4.855	4.227	3.869	2.92
11	7.296	7.317	5.157	5.06	4.205	3.829	2.83
11.01	7.208	7.317	5.274	4.565	4.19	3.821	3.02
11.02	7.032	7.173	5.805	4.56	4.193	3.824	2.93
11.03	7.2	7.263	5.355	4.63	4.222	3.844	3.14
11.04	7.384	6.894	5.598	4.535	4.154	3.878	3.29
11.05	6.984	7.173	5.589	4.59	4.288	3.867	2.98
11.06	7.72	7.263	5.247	4.435	4.205	3.817	3.12
11.07	6.856	7.047	5.67	4.63	4.272	3.832	2.87
11.08	7.088	7.191	5.445	4.675	4.328	3.88	2.99
11.09	7.712	7.443	5.409	4.795	4.144	3.769	2.86
11.1	6.72	7.182	5.679	4.43	4.145	3.779	2.99
11.11	6.344	7.398	5.427	4.755	4.209	3.786	2.83
11.12	6.16	6.822	5.193	4.525	4.165	3.851	3.34
11.13	6.264	6.93	5.148	4.71	4.225	3.845	2.63
11.14	6.224	7.281	5.517	4.72	4.16	3.834	3.06
11.15	6.048	7.182	4.986	4.725	4.164	3.82	2.85
11.16	6.432	7.164	5.472	4.71	4.182	3.855	4.33
11.17	6.544	6.93	5.274	4.465	4.155	3.881	3.21
11.18	6.336	7.281	5.526	4.42	4.219	3.816	3.11
11.19	6.264	7.974	5.094	5.025	4.241	3.845	2.77
11.2	6.144	7.083	5.364	4.625	4.334	3.911	2.98
11.21	6.352	6.777	5.229	4.38	4.195	3.843	2.8
11.22	6.84	6.66	5.454	4.67	4.232	3.837	2.86
11.23	7	6.624	5.409	4.545	4.231	3.828	2.96
11.24	7.288	6.903	5.751	4.685	4.204	3.825	3.01
11.25	6.36	7.245	5.04	4.685	4.182	3.849	2.65
11.26	6.696	6.903	5.436	4.52	4.157	3.856	2.77
11.27	7.128	6.66	5.193	4.365	4.245	3.908	2.99
11.28	6.96	7.092	5.661	4.215	4.184	3.846	3.35
11.29	6.368	7.209	4.932	4.665	4.173	3.854	3.02
11.3	6.088	6.543	5.301	4.005	4.191	3.846	2.75
11.31	5.912	7.326	5.436	4.805	4.175	3.803	3.02
11.32	6.872	7.218	5.625	4.505	4.201	3.87	3.14
11.33	6.432	6.849	5.481	4.795	4.244	3.876	2.88
11.34	6.8	7.398	5.364	4.615	4.144	3.83	2.82
11.35	6.312	7.092	5.139	4.63	4.118	3.846	3.15
11.36	7.592	6.777	5.328	4.58	4.259	3.842	3.21
11.37	7.016	7.191	5.13	4.335	4.144	3.863	2.82
11.38	6.808	7.533	5.004	4.43	4.151	3.791	2.79
11.39	6.664	7.407	5.157	4.22	4.158	3.803	3.4
11.4	6.84	7.2	5.679	4.21	4.148	3.821	3.15
11.41	6.376	7.416	5.256	4.8	4.186	3.912	3.55
11.42	6.28	6.912	5.346	4.54	4.182	3.807	2.87
11.43	6.224	6.876	5.49	4.52	4.172	3.797	2.89
11.44	6.448	6.903	5.391	4.625	4.091	3.809	3.09
11.45	8.184	7.155	5.652	4.285	4.169	3.775	3.01
11.46	7.488	7.2	5.76	4.395	4.085	3.782	2.93
11.47	6.904	6.885	5.634	4.335	4.169	3.839	2.91
11.48	5.976	6.804	5.301	4.68	4.193	3.819	2.89
11.49	7	7.11	5.544	4.17	4.103	3.805	2.99
11.5	6.552	7.164	5.427	4.39	4.086	3.816	2.92
11.51	6.816	7.641	5.301	4.285	4.2	3.84	3.24
11.52	7.288	7.389	5.364	4.54	4.165	3.801	2.91
11.53	7.08	7.443	5.715	4.875	4.09	3.832	3.02
11.54	7.416	6.732	5.49	4.845	4.19	3.85	3.25
11.55	7.032	7.218	5.454	4.51	4.207	3.856	3.04
11.56	7.856	6.516	5.211	4.3	4.21	3.956	3.37
11.57	7.568	6.867	5.499	4.44	4.2	3.865	3.03
11.58	7.032	6.552	5.409	4.865	4.125	3.844	2.73
11.59	7.624	7.38	5.742	4.56	4.161	3.831	2.89
11.6	7.688	7.2	5.562	4.615	4.111	3.822	3.03
11.61	7.92	7.299	5.571	4.39	4.272	3.87	3.1
11.62	7.32	7.056	5.085	4.835	4.204	3.882	2.81
11.63	5.904	7.371	5.535	4.67	4.186	3.855	2.95
11.64	6.872	7.353	5.409	4.785	4.176	3.824	3.12
11.65	7.208	6.876	5.544	4.57	4.257	3.917	2.86
11.66	7.504	8.037	5.382	4.24	4.259	3.82	2.98
11.67	7.024	7.056	5.31	4.79	4.2	3.884	2.93
11.68	7.592	7.632	5.139	4.645	4.261	3.834	2.88
11.69	7.344	7.479	5.886	4.32	4.254	3.856	2.83
11.7	6.552	6.705	5.319	4.405	4.238	3.853	3
11.71	7.04	6.651	5.301	4.845	4.181	3.858	2.82
11.72	7.072	6.561	5.256	4.8	4.131	3.81	2.65
11.73	7.12	6.948	5.85	4.615	4.198	3.875	2.87
11.74	7.808	6.777	5.139	4.88	4.229	3.844	3.31
11.75	7.304	7.047	5.544	4.6	4.266	3.888	3.55
11.76	7.392	7.227	5.508	4.355	4.24	3.838	2.9
11.77	7.616	7.182	5.427	4.6	4.147	3.809	2.73
11.78	7.408	6.885	5.391	4.635	4.155	3.822	2.76
11.79	7.6	7.569	5.463	4.81	4.26	3.886	2.73
11.8	7.208	6.48	5.706	4.835	4.135	3.892	3.49
11.81	7.304	7.335	5.733	4.43	4.186	3.867	2.73
11.82	6.888	7.263	5.391	4.545	4.215	3.868	3.06
11.83	6.408	7.29	5.589	4.125	4.173	3.839	2.73
11.84	6.032	6.975	5.247	4.455	4.18	3.848	2.95
11.85	6.848	7.515	5.301	4.565	4.277	3.876	2.96
11.86	6.856	7.488	5.382	4.455	4.222	3.897	3.66
11.87	6.192	6.93	5.445	4.9	4.155	3.845	3.04
11.88	6.544	7.029	5.58	4.6	4.182	3.861	3.78
11.89	7.4	7.974	5.571	4.61	4.21	3.803	3.31
11.9	7.856	7.074	5.652	4.54	4.157	3.857	3.31
11.91	7.912	7.272	4.887	4.425	4.209	3.865	2.81
11.92	6.944	7.047	5.517	4.31	4.222	3.828	2.85
11.93	7.64	7.668	5.724	4.905	4.221	3.884	2.87
11.94	7.16	6.723	5.454	4.7	4.202	3.858	2.84
11.95	7.608	6.804	5.355	4.41	4.209	3.87	3.38
11.96	6.448	6.174	5.274	4.64	4.311	3.807	3.72
11.97	6.16	7.713	5.328	4.765	4.211	3.863	2.95
11.98	6.84	6.894	5.319	4.945	4.159	3.833	2.74
11.99	6.416	7.236	5.139	4.81	4.26	3.88	3.06
12	6.984	6.984	4.959	5.01	4.246	3.768	2.83
12.01	6.496	7.191	5.481	4.325	4.229	3.807	3.11
12.02	7.136	6.759	5.328	4.365	4.275	3.858	3.69
12.03	7.024	6.696	5.472	4.605	4.284	3.836	2.83
12.04	7.088	7.155	5.742	4.42	4.147	3.821	3.37
12.05	7.08	6.948	5.31	4.48	4.225	3.908	3.08
12.06	7.024	6.966	5.409	4.775	4.206	3.837	3.1
12.07	7.32	7.137	5.526	4.66	4.198	3.844	2.85
12.08	7.136	6.435	5.616	4.325	4.297	3.789	2.86
12.09	7.128	6.633	5.382	4.54	4.217	3.814	2.83
12.1	6.84	7.326	5.814	4.545	4.167	3.873	2.98
12.11	6.872	7.317	5.499	4.535	4.246	3.791	2.8
12.12	7.048	7.335	5.364	4.465	4.214	3.89	3.36
12.13	7.12	7.2	5.4	4.75	4.243	3.855	2.82
12.14	7.368	7.2	5.616	4.575	4.226	3.828	2.93
12.15	7.664	6.903	5.805	4.355	4.196	3.837	2.88
12.16	7.248	7.65	5.535	4.64	4.214	3.829	2.77
12.17	6.776	6.867	5.787	4.84	4.329	3.886	3.05
12.18	6.6	7.227	5.625	4.585	4.251	3.807	2.91
12.19	6.616	7.758	5.274	4.885	4.152	3.83	2.88
12.2	5.904	7.191	5.49	4.885	4.216	3.881	3.39
12.21	5.888	7.344	5.49	4.45	4.18	3.856	2.88
12.22	5.92	7.398	5.175	4.49	4.208	3.814	2.9
12.23	5.808	7.29	5.211	4.555	4.189	3.903	3.13
12.24	5.888	7.182	5.751	4.1	4.206	3.872	2.86
12.25	7.128	6.723	5.337	4.18	4.155	3.854	2.96
12.26	6.392	6.966	5.319	4.345	4.224	3.884	3.09
12.27	6.864	7.677	5.319	4.655	4.174	3.879	2.98
12.28	7.128	7.758	5.319	4.265	4.106	3.753	2.91
12.29	6.936	7.542	5.157	4.74	4.186	3.89	2.97
12.3	7.032	7.317	5.688	4.34	4.207	3.829	2.71
12.31	6.928	7.11	5.598	4.435	4.126	3.795	2.88
12.32	6.456	6.849	5.544	4.28	4.22	3.779	3.02
12.33	5.824	7.281	5.292	4.305	4.27	3.789	3.04
12.34	5.568	7.398	5.463	4.68	4.251	3.85	2.91
12.35	5.728	7.299	5.202	4.575	4.259	3.889	3.47
12.36	5.824	6.831	5.256	4.865	4.263	3.899	2.87
12.37	5.656	6.993	5.571	4.565	4.207	3.829	2.83
12.38	6.344	6.813	5.436	4.18	4.282	3.893	3.06
12.39	6.032	6.651	5.355	4.655	4.229	3.835	2.74
12.4	6.176	6.363	5.382	4.485	4.279	3.82	2.91
12.41	5.792	7.704	5.508	4.535	4.202	3.783	2.98
12.42	5.504	7.101	5.301	4.88	4.235	3.833	2.77
12.43	5.984	7.227	5.373	4.46	4.213	3.829	3.2
12.44	6.816	7.218	5.202	4.435	4.255	3.842	3
12.45	5.88	7.353	5.418	4.215	4.329	3.822	2.67
12.46	6.136	6.831	5.616	4.415	4.219	3.761	2.87
12.47	5.92	7.578	5.589	4.835	4.24	3.796	2.85
12.48	6.072	7.299	5.436	4.735	4.356	3.906	2.84
12.49	6.304	7.353	5.679	4.395	4.352	3.837	2.7
12.5	6.144	7.38	5.634	4.2	4.368	3.858	2.81
12.51	5.688	6.975	5.31	4.255	4.348	3.893	3.29
12.52	6.024	7.047	5.31	4.645	4.422	3.893	2.87
12.53	5.928	7.875	5.616	4.495	4.291	3.907	2.97
12.54	5.768	6.732	5.841	4.78	4.266	3.867	2.87
12.55	5.936	7.272	5.337	4.555	4.255	3.884	2.86
12.56	6.112	7.416	5.76	4.965	4.366	3.876	3.18
12.57	6.048	6.723	5.751	4.46	4.311	3.907	2.8
12.58	6.792	7.02	5.409	4.22	4.227	3.872	2.73
12.59	5.88	6.534	5.652	4.32	4.293	3.868	3.27
12.6	6.416	6.732	5.418	4.515	4.25	3.817	2.97
12.61	6.264	7.191	5.175	4.695	4.239	3.854	2.89
12.62	6.304	7.128	5.229	4.595	4.243	3.849	2.85
12.63	7.344	7.866	5.301	4.43	4.32	3.938	3.1
12.64	6.056	7.407	5.445	4.53	4.307	3.912	2.97
12.65	6.456	7.128	5.139	4.735	4.198	3.799	3.19
12.66	6.544	7.632	5.508	4.39	4.254	3.885	2.76
12.67	5.928	7.029	5.436	4.62	4.203	3.738	3.27
12.68	5.952	6.57	5.301	4.3	4.325	3.841	2.74
12.69	5.912	7.29	5.616	4.36	4.286	3.838	2.83
12.7	6.272	7.281	5.742	4.67	4.264	3.97	3.27
12.71	6.248	7.371	5.985	4.68	4.245	3.892	3.17
12.72	6.592	7.083	5.328	4.36	4.19	3.837	2.83
12.73	5.872	7.362	5.391	4.58	4.281	3.868	2.87
12.74	6.28	6.444	5.4	4.415	4.248	3.831	3.02
12.75	6.096	6.813	5.751	4.835	4.306	3.771	3
12.76	6.32	6.912	5.679	4.905	4.244	3.815	2.73
12.77	6.024	7.605	5.364	4.71	4.328	3.766	3.05
12.78	6.136	7.245	5.454	4.57	4.295	3.683	2.79
12.79	6.224	7.227	5.463	4.695	4.179	3.662	3.05
12.8	5.888	7.308	5.292	4.89	4.233	3.733	3.03
12.81	6.424	7.389	5.571	4.465	4.306	3.685	2.83
12.82	6.68	6.768	5.067	4.71	4.308	3.701	3.02
12.83	6.064	7.182	5.409	4.55	4.328	3.86	2.84
12.84	6.44	7.263	5.544	4.595	4.457	3.868	3.09
12.85	6.256	7.038	5.553	4.475	4.386	3.801	3.11
12.86	6.096	7.425	5.346	4.59	4.319	3.772	2.89
12.87	6.296	7.587	5.319	4.265	4.304	3.672	2.97
12.88	6.088	7.344	5.769	4.39	4.28	3.634	2.79
12.89	6.328	7.785	5.058	4.46	4.332	3.66	2.7
12.9	6.04	7.533	5.67	4.715	4.278	3.64	2.97
12.91	6.072	7.524	5.544	4.25	4.35	3.743	3.05
12.92	6.4	7.416	5.319	4.41	4.32	3.728	3.53
12.93	6.28	7.146	5.463	4.485	4.265	3.685	2.95
12.94	5.992	7.569	5.607	4.575	4.231	3.689	3.01
12.95	6.632	7.785	5.427	4.45	4.221	3.625	3.31
12.96	6.912	7.587	5.58	4.73	4.312	3.746	2.93
12.97	7.24	7.38	5.202	4.685	4.333	3.735	3.41
12.98	7.296	7.614	5.328	4.655	4.34	3.727	3.01
12.99	6.256	7.182	5.022	4.54	4.28	3.683	2.92
13	6.36	6.624	5.553	4.94	4.47	3.819	2.92
13.01	6.88	7.632	5.346	4.855	4.331	3.859	2.84
13.02	6.616	7.812	5.319	4.61	4.371	3.789	2.81
13.03	6.256	7.245	5.625	4.255	4.372	3.702	2.75
13.04	5.984	7.65	5.256	4.23	4.351	3.736	2.95
13.05	6.264	6.768	4.896	4.74	4.287	3.709	2.83
13.06	6.744	7.272	5.112	5.05	4.157	3.671	2.75
13.07	6.664	7.668	5.193	4.59	4.127	3.646	2.83
13.08	6.624	6.705	5.634	4.45	4.083	3.623	3.14
13.09	6.272	7.677	5.58	4.665	4.064	3.682	2.99
13.1	6.12	6.867	5.112	4.53	4.117	3.651	2.81
13.11	5.32	7.182	5.301	4.58	4.118	3.653	2.84
13.12	6.248	7.659	5.553	4.785	4.148	3.675	2.99
13.13	6.4	7.263	5.13	4.73	4.139	3.648	2.87
13.14	6.6	7.632	5.481	4.475	4.093	3.614	2.91
13.15	5.864	7.209	5.391	4.54	4.183	3.687	3.29
13.16	6.048	7.281	5.112	4.45	4.083	3.651	2.95
13.17	5.928	6.957	5.085	4.555	4.042	3.63	2.67
13.18	6.496	7.164	4.995	4.92	4.096	3.675	3.1
13.19	6.16	7.686	5.445	4.58	4.073	3.674	3.22
13.2	6.048	7.389	5.742	4.555	4.077	3.608	2.78
13.21	6.32	8.172	5.544	4.785	4.166	3.669	2.98
13.22	5.544	8.055	5.292	4.805	4.23	3.704	2.95
13.23	6.192	6.876	4.851	4.67	4.141	3.67	2.91
13.24	6.016	7.425	5.247	4.705	4.128	3.629	2.91
13.25	6.12	7.128	5.499	4.715	4.213	3.666	2.78
13.26	6.008	7.047	5.301	4.7	4.145	3.712	2.92
13.27	6.096	7.488	5.22	4.795	4.142	3.639	3.06
13.28	6.032	7.677	5.436	4.545	4.289	3.715	2.92
13.29	5.896	7.074	5.238	4.535	4.104	3.622	3.22
13.3	5.912	6.903	5.301	4.495	4.184	3.65	3.18
13.31	5.992	7.614	5.202	4.525	4.185	3.594	2.92
13.32	6.064	7.119	5.733	4.515	4.156	3.625	2.85
13.33	5.936	7.02	5.166	5.015	4.226	3.735	2.67
13.34	6.264	7.047	5.301	4.92	4.178	3.691	2.76
13.35	5.8	7.821	5.49	4.835	4.194	3.645	2.72
13.36	5.664	6.966	5.094	4.525	4.209	3.644	2.8
13.37	6.304	7.425	5.301	4.44	4.133	3.714	2.87
13.38	5.8	6.93	5.112	4.565	4.109	3.63	3.02
13.39	6.328	7.335	5.166	4.66	4.12	3.629	2.92
13.4	6.12	7.47	4.833	4.645	4.05	3.658	2.81
13.41	5.904	7.11	5.148	4.455	4.186	3.651	3.03
13.42	5.936	6.768	5.499	4.6	4.118	3.611	2.72
13.43	6.12	7.263	4.95	4.68	4.215	3.616	3.07
13.44	6.096	7.398	5.274	4.765	4.076	3.658	2.73
13.45	6.544	6.921	5.634	4.785	3.981	3.642	2.93
13.46	6.2	6.795	5.436	4.245	4.154	3.673	3.05
13.47	6.144	6.849	5.949	4.665	4.112	3.688	2.81
13.48	6.344	6.543	5.256	4.62	4.128	3.618	3
13.49	6.136	6.498	5.166	4.745	4.049	3.641	2.86
13.5	6.704	6.786	5.247	4.82	4.178	3.658	2.91
13.51	5.96	6.903	5.184	4.62	4.209	3.647	2.78
13.52	5.808	6.93	5.373	4.7	4.046	3.654	2.92
13.53	6.264	7.488	4.851	4.875	4.14	3.618	2.98
13.54	6.184	7.191	5.049	4.61	4.153	3.616	2.99
13.55	6.144	7.488	5.274	4.59	4.266	3.643	3.11
13.56	5.92	7.083	5.175	4.535	4.176	3.653	3.13
13.57	6	6.408	5.202	4.64	4.123	3.628	2.75
13.58	5.864	7.218	5.22	4.58	4.15	3.583	2.96
13.59	5.848	7.056	5.184	4.27	4.248	3.693	3
13.6	5.552	7.353	5.193	4.435	4.148	3.618	2.76
13.61	5.984	7.11	5.481	4.565	4.205	3.649	2.94
13.62	6.192	6.777	5.202	4.325	4.156	3.616	2.89
13.63	6.112	6.858	5.13	4.98	4.112	3.573	2.79
13.64	6.432	6.696	5.265	4.78	4.206	3.682	2.82
13.65	6.208	6.858	5.175	4.29	4.183	3.7	2.88
13.66	6.464	7.605	5.364	5.16	4.218	3.685	3.08
13.67	5.696	7.029	5.544	4.22	4.057	3.69	5.7
13.68	5.72	7.659	5.148	4.8	4.179	3.643	2.87
13.69	5.976	7.704	5.121	4.55	4.138	3.688	2.78
13.7	6.184	7.227	5.058	4.945	4.162	3.692	2.88
13.71	5.64	6.939	5.499	4.615	4.16	3.652	2.91
13.72	5.68	6.84	5.292	4.75	4.125	3.627	3.04
13.73	5.784	7.353	5.238	4.525	4.065	3.642	2.9
13.74	6.352	7.515	5.4	4.245	4.079	3.689	2.77
13.75	6.352	7.326	5.571	4.995	4.052	3.587	2.91
13.76	5.872	7.497	5.391	4.38	4.146	3.692	2.78
13.77	6.032	7.605	5.004	4.815	4.097	3.665	2.72
13.78	5.52	7.146	5.337	4.86	4.165	3.706	2.94
13.79	6.504	6.966	5.103	4.535	4.091	3.615	2.99
13.8	6.208	6.264	5.229	4.425	3.937	3.546	2.77
13.81	5.336	7.146	5.436	4.57	4.04	3.65	2.79
13.82	6.408	7.713	5.256	4.855	4.122	3.643	3.07
13.83	6.28	6.885	5.292	4.395	4.107	3.686	2.69
13.84	6.248	7.047	5.526	4.58	4.146	3.694	2.78
13.85	5.616	7.164	5.247	4.76	4.112	3.601	2.94
13.86	6.232	7.182	5.688	4.91	4.115	3.642	2.79
13.87	6.496	7.749	5.499	4.61	4.153	3.647	2.89
13.88	6.328	7.614	5.148	4.505	4.164	3.628	2.85
13.89	6.048	7.587	5.688	4.075	4.153	3.663	2.99
13.9	6.496	7.578	5.346	4.31	4.149	3.657	3.03
13.91	6.16	7.596	5.022	4.68	4.112	3.715	2.95
13.92	6.24	6.741	5.031	4.275	4.177	3.698	3.2
13.93	6.16	6.93	5.499	4.595	4.131	3.646	2.92
13.94	6.48	6.669	5.238	4.33	4.099	3.662	2.84
13.95	6.032	7.263	5.157	4.58	4.133	3.634	2.85
13.96	6.328	7.758	5.166	4.82	4.15	3.62	2.92
13.97	6.992	6.831	5.544	4.77	4.178	3.652	2.7
13.98	6.248	7.506	5.283	4.9	4.27	3.754	2.85
13.99	5.984	7.02	5.076	4.535	4.14	3.615	3.08
14	6.136	7.749	5.283	4.73	4.084	3.627	2.71
14.01	6.056	7.227	5.22	4.57	4.042	3.66	2.77
14.02	6.056	6.84	5.148	4.96	4.202	3.68	3.03
14.03	6.144	7.398	5.121	4.57	4.129	3.691	2.95
14.04	5.936	6.768	5.319	4.495	4.095	3.654	2.79
14.05	5.968	7.65	5.238	4.415	4.129	3.654	2.85
14.06	6.248	7.038	5.049	4.64	4.197	3.585	3.02
14.07	6.416	6.957	5.148	4.165	4.091	3.624	2.92
14.08	6.072	7.56	5.166	4.455	4.216	3.715	3.15
14.09	6.448	7.299	5.112	4.64	4.185	3.616	3.1
14.1	5.936	6.714	5.301	4.375	4.226	3.671	2.91
14.11	5.776	7.038	5.103	4.255	4.286	3.693	2.75
14.12	5.704	7.002	5.589	4.405	4.099	3.662	2.78
14.13	6	7.497	5.409	4.335	4.124	3.609	2.89
14.14	5.656	6.84	5.319	4.46	4.248	3.758	2.86
14.15	5.824	6.93	5.463	4.43	4.214	3.774	3.03
14.16	6.048	7.29	5.184	4.94	4.171	3.725	3.17
14.17	6.184	7.281	4.986	4.375	4.281	3.667	2.78
14.18	5.976	7.119	5.265	4.635	4.135	3.563	2.87
14.19	6.272	6.804	5.328	4.24	4.14	3.584	2.92
14.2	6.504	7.2	5.382	4.12	4.265	3.716	2.89
14.21	5.904	6.894	5.211	4.435	4.134	3.68	2.78
14.22	5.784	6.777	5.355	4.585	4.22	3.728	2.99
14.23	5.68	6.759	5.058	4.735	4.204	3.716	3.01
14.24	5.848	6.966	5.166	4.52	4.209	3.682	3.09
14.25	6.072	6.858	5.058	4.515	4.344	3.758	2.82
14.26	5.744	7.497	5.211	4.48	4.233	3.725	3.12
14.27	6.056	7.254	5.454	4.64	4.293	3.662	2.93
14.28	6.096	7.587	5.058	4.41	4.199	3.64	3.05
14.29	6.872	7.506	5.238	4.455	4.146	3.73	2.92
14.3	5.976	6.948	5.283	4.615	4.197	3.786	3.01
14.31	5.752	7.389	5.31	4.58	4.163	3.635	2.83
14.32	6.432	7.506	5.076	5.035	4.051	3.583	3.21
14.33	6.056	7.407	5.301	4.685	4.081	3.649	2.78
14.34	6.208	6.948	5.463	4.495	4.016	3.633	2.83
14.35	6.432	7.821	5.031	4.605	4.208	3.671	2.95
14.36	6.496	8.154	5.031	4.765	4.054	3.653	2.74
14.37	5.76	7.263	5.184	4.735	4.15	3.691	3
14.38	6.232	7.155	5.346	4.66	4.076	3.624	2.78
14.39	5.368	7.353	5.31	4.495	4.216	3.677	3.08
14.4	6.232	7.758	5.184	5.19	4.065	3.6	2.9
14.41	5.376	7.263	4.959	4.625	4.002	3.626	2.74
14.42	6.2	7.182	4.905	4.575	4.132	3.721	2.88
14.43	6.072	7.344	5.031	4.71	4.195	3.689	2.89
14.44	5.96	7.533	5.04	4.32	4.226	3.69	3.02
14.45	5.912	7.569	5.076	4.32	4.291	3.783	2.96
14.46	5.768	7.452	5.301	4.72	4.191	3.669	2.98
14.47	6.376	7.695	5.076	4.37	4.187	3.664	2.93
14.48	6.088	7.938	5.31	4.49	4.267	3.653	2.88
14.49	5.68	7.56	5.382	5.005	4.318	3.702	2.78
14.5	6.28	7.695	5.301	4.59	4.25	3.729	2.89
14.51	5.896	7.794	5.058	4.72	4.223	3.639	2.85
14.52	6.52	7.101	5.328	4.48	4.215	3.664	2.64
14.53	6.32	6.849	4.806	4.49	4.197	3.693	2.87
14.54	5.968	8.001	4.995	4.99	4.299	3.758	2.75
14.55	6.216	7.803	5.535	4.425	4.181	3.713	3.08
14.56	6	6.912	5.031	4.24	4.332	3.79	3.15
14.57	6.216	7.182	5.184	4.275	4.204	3.652	3.12
14.58	6.376	7.209	5.508	4.245	4.028	3.577	3.01
14.59	6.672	6.984	5.436	4.62	4.154	3.713	2.73
14.6	5.872	7.668	5.139	5.01	4.131	3.636	2.77
14.61	6.184	7.884	5.013	4.745	4.185	3.691	2.83
14.62	6.312	7.776	5.031	4.745	4.173	3.638	2.72
14.63	6.04	8.289	5.373	4.81	4.161	3.701	2.74
14.64	6.368	8.496	4.959	5.065	4.248	3.696	2.83
14.65	6.16	7.866	5.175	4.675	4.156	3.782	2.91
14.66	5.888	8.415	4.941	4.84	4.078	3.659	2.82
14.67	5.952	7.776	5.355	5.17	4.204	3.685	2.99
14.68	6.28	8.244	5.256	4.825	4.354	3.717	2.8
14.69	6.096	8.487	5.517	5.245	4.155	3.629	3.12
14.7	5.944	7.938	4.797	5.37	4.206	3.649	2.79
14.71	5.776	8.415	5.04	5.32	4.169	3.714	3
14.72	6.384	7.956	5.004	5.12	4.159	3.644	3.1
14.73	6.128	8.073	5.193	4.77	4.092	3.566	2.9
14.74	6.656	8.163	5.13	4.85	4.145	3.768	2.85
14.75	6.544	9.189	5.139	5.375	3.973	3.624	2.87
14.76	6.416	8.019	5.157	5.14	4.248	3.717	3.12
14.77	6.456	8.46	5.022	5.39	4.145	3.655	2.82
14.78	6.368	8.298	5.382	5.06	4.183	3.658	2.82
14.79	6.152	8.037	5.211	4.965	4.235	3.713	2.93
14.8	6.088	7.911	5.301	4.745	4.14	3.727	3.05
14.81	6.576	8.073	5.418	4.97	4.239	3.743	2.72
14.82	6.016	8.289	5.274	5.145	4.128	3.67	2.87
14.83	5.84	8.649	4.86	5.61	4.189	3.749	2.94
14.84	6.448	9.513	5.139	5.295	4.331	3.699	2.95
14.85	6.056	8.721	5.346	5.505	4.224	3.734	2.83
14.86	6.6	9.027	5.094	5.555	4.212	3.675	3.26
14.87	6.424	9.342	4.986	5.32	4.169	3.692	3.35
14.88	6.472	8.172	5.238	5.705	4.244	3.698	3
14.89	5.76	8.631	5.256	5.18	4.08	3.638	3.25
14.9	6.448	8.946	5.31	5.37	4.085	3.673	2.98
14.91	6.44	8.514	5.112	5.425	4.054	3.676	2.87
14.92	6.288	9.243	4.878	5.53	4.179	3.741	3.78
14.93	6.576	8.694	5.265	5.765	4.068	3.621	2.99
14.94	6.32	9.333	5.256	5.5	4.241	3.648	2.88
14.95	6.896	9.162	5.418	5.43	4.189	3.701	2.89
14.96	7.256	9.009	4.878	5.415	4.316	3.664	2.87
14.97	7.168	8.406	5.175	5.71	4.209	3.694	3.44
14.98	6.864	9.153	5.13	5.56	4.13	3.655	3.02
14.99	6.648	8.352	5.211	5.465	4.187	3.712	2.97
15	6.624	9.576	5.103	5.66	4.356	3.756	2.92
15.01	7.144	8.469	5.085	5.6	4.368	3.729	2.77
15.02	7.24	8.955	5.049	5.6	4.274	3.81	2.73
15.03	6.568	8.334	5.184	5.41	4.273	3.632	2.9
15.04	6.512	8.496	5.499	5.47	4.24	3.658	2.76
15.05	6.072	7.902	5.031	5.6	4.208	3.624	2.73
15.06	6.888	9.027	5.589	5.585	4.165	3.733	2.85
15.07	5.656	8.649	5.409	5.31	4.194	3.708	2.88
15.08	5.768	9.198	5.175	5.35	4.125	3.541	2.8
15.09	6.592	8.874	5.067	5.515	4.261	3.68	3.13
15.1	6.68	9.468	5.022	5.42	4.168	3.775	2.83
15.11	5.816	9.018	4.932	5.245	4.066	3.736	3.08
15.12	6.392	9.315	5.076	5.215	4.147	3.7	3.01
15.13	6.4	8.433	5.229	5.085	4.08	3.638	2.99
15.14	6.304	8.694	5.049	4.915	4.049	3.685	2.93
15.15	6.616	8.388	5.247	5.435	4.171	3.685	2.92
15.16	6.816	8.91	5.382	5.25	4.216	3.685	2.97
15.17	6.016	8.784	5.067	5.8	4.267	3.738	3.65
15.18	6.064	7.587	5.544	5.02	4.292	3.747	2.82
15.19	5.952	8.676	5.454	5.74	4.278	3.694	2.9
15.2	6.312	8.352	5.121	4.925	4.19	3.638	2.83
15.21	5.84	7.992	5.544	5.675	4.093	3.756	3.09
15.22	5.16	8.379	5.085	5.51	4.227	3.67	2.76
15.23	5.96	8.352	5.598	5.73	4.233	3.725	2.76
15.24	6.072	8.604	5.571	5.36	4.359	3.745	3.13
15.25	6.2	8.1	5.49	5.62	4.093	3.592	2.94
15.26	6.056	8.244	5.526	5.205	4.276	3.737	3.1
15.27	6.944	8.109	5.391	5.84	3.941	3.733	2.86
15.28	7.168	7.929	5.526	5.195	4.096	3.64	3.01
15.29	6.352	8.865	5.463	5.25	3.943	3.698	2.93
15.3	5.672	8.577	5.661	5.04	4.129	3.648	2.84
15.31	6.392	8.082	5.49	5.46	4.168	3.715	3.24
15.32	6.392	8.091	5.175	5.175	4.128	3.666	2.8
15.33	6.608	8.046	5.112	5.475	4.144	3.693	3.01
15.34	6.848	7.794	5.274	5.525	4.281	3.676	2.96
15.35	6.696	8.226	6.102	5.085	4.208	3.645	2.71
15.36	6.64	8.019	5.49	4.92	4.273	3.766	2.86
15.37	7.032	8.613	5.751	5.505	4.164	3.661	3.07
15.38	6.832	8.145	5.553	4.89	4.287	3.812	2.84
15.39	6.808	8.235	5.571	4.675	4.201	3.647	3.33
15.4	6.536	8.901	5.598	5.055	4.196	3.677	3.04
15.41	6.072	9.279	5.409	5.25	4.197	3.703	2.77
15.42	6.672	8.937	5.076	5.005	4.195	3.629	2.98
15.43	6.296	8.01	5.319	5.005	4.362	3.684	3.07
15.44	6.376	8.424	5.409	5.095	4.294	3.704	2.97
15.45	6.536	7.443	5.337	4.53	4.277	3.696	3.26
15.46	5.976	7.569	5.778	4.885	4.304	3.742	3.67
15.47	5.896	8.019	5.157	5.19	4.156	3.584	2.71
15.48	6.104	7.83	5.157	5.005	4.185	3.683	2.93
15.49	6.352	8.334	5.175	5.165	4.11	3.657	2.76
15.5	6.04	8.424	5.22	4.715	4.006	3.633	2.92
15.51	6.56	7.569	5.247	4.765	4.124	3.676	2.82
15.52	6.76	8.55	5.049	5.545	4.185	3.703	2.81
15.53	5.96	8.1	5.022	5.555	4.321	3.737	3.06
15.54	5.952	9.045	4.923	5.97	4.145	3.696	3.04
15.55	5.688	8.568	5.004	5.71	4.25	3.843	2.88
15.56	6.272	7.74	4.941	5.445	4.163	3.62	2.77
15.57	6.304	8.424	5.139	5.815	4.201	3.666	3.06
15.58	6.896	8.874	5.211	5.625	4.286	3.707	3
15.59	6.808	8.937	5.4	5.545	4.164	3.684	2.93
15.6	6.168	8.829	5.355	5.33	4.273	3.751	2.96
15.61	6.28	8.046	5.184	5.485	4.121	3.606	2.79
15.62	6.312	8.379	4.914	5.43	4.202	3.625	3.01
15.63	6.752	9.072	5.643	5.94	4.199	3.631	2.9
15.64	6.456	8.046	5.427	4.965	4.27	3.796	3.04
15.65	6.32	7.515	5.112	4.76	4.178	3.732	2.91
15.66	6.56	8.469	5.373	5.015	4.235	3.805	2.73
15.67	5.936	8.505	5.247	5.255	3.845	3.679	2.88
15.68	6.952	8.217	5.598	5.245	4.113	3.768	2.78
15.69	6.424	8.919	5.337	5.185	4.104	3.71	3.34
15.7	6.688	7.389	5.571	4.895	4.061	3.646	3.15
15.71	6.216	7.524	5.103	4.755	4.038	3.606	3.19
15.72	6.08	8.541	4.851	5.125	4.116	3.676	3.01
15.73	6.136	8.901	5.229	5.65	4.055	3.659	2.89
15.74	6.296	8.568	5.103	5.155	4.144	3.628	2.74
15.75	5.84	8.262	5.121	5.23	4.288	3.759	3.05
15.76	6.248	8.217	5.184	4.935	4.123	3.713	2.85
15.77	6.384	8.406	5.49	5.265	4.071	3.633	2.7
15.78	6.232	8.37	4.842	5.57	4.261	3.724	3.05
15.79	5.456	7.794	5.031	4.885	4.118	3.635	3.19
15.8	5.712	8.145	5.112	5.185	4.168	3.634	2.81
15.81	5.96	8.289	5.283	4.88	4.23	3.672	2.86
15.82	6.136	8.532	5.238	5.195	4.236	3.704	3.14
15.83	5.776	9.198	5.139	5.165	4.156	3.715	2.81
15.84	6.36	8.028	5.346	5.165	3.995	3.659	2.75
15.85	6.808	8.595	5.094	5.195	4.197	3.709	2.94
15.86	6.6	7.668	5.526	5.055	4.18	3.695	3.05
15.87	6.76	7.992	5.517	4.985	4.201	3.687	2.79
15.88	6.992	8.019	5.049	4.915	4.209	3.644	3.37
15.89	6.88	8.082	5.076	5.155	4.17	3.634	2.78
15.9	6.736	7.578	4.941	4.84	4.208	3.674	2.72
15.91	6.976	8.226	5.229	5.26	4.124	3.622	3.25
15.92	6.856	8.163	4.995	5.085	4.107	3.731	3.54
15.93	6.992	8.64	5.193	5.395	4.291	3.665	2.87
15.94	6.664	9.036	5.112	5.28	4.257	3.704	3.12
15.95	6.656	9	5.22	5.325	4.272	3.773	3.14
15.96	7.152	7.83	5.085	4.925	4.226	3.652	3.01
15.97	6.696	7.848	5.184	4.9	4.275	3.685	2.8
15.98	6.952	7.983	5.31	4.975	4.279	3.656	3.16
15.99	7.336	8.316	5.292	5.21	4.325	3.681	2.91
16	6.416	8.217	5.445	4.795	4.193	3.657	3.09
16.01	7.272	6.633	4.959	4.78	4.168	3.725	3.19
16.02	6.896	8.019	5.076	5.055	4.18	3.668	2.71
16.03	7.048	7.353	5.391	5.015	4.282	3.719	3.08
16.04	7.04	9.009	5.535	4.53	4.178	3.683	2.73
16.05	7.288	8.235	5.31	4.56	4.304	3.772	3.17
16.06	6.848	8.703	5.283	5.265	4.27	3.747	3.15
16.07	6.552	8.082	5.607	4.555	4.104	3.658	2.83
16.08	7.12	7.893	5.454	5.2	4.114	3.693	2.79
16.09	6.536	7.389	5.274	4.705	4.122	3.679	2.74
16.1	7.36	7.587	5.238	4.61	4.241	3.753	2.8
16.11	7.328	7.974	5.355	5.07	4.205	3.743	2.87
16.12	7.032	8.163	5.346	4.34	4.273	3.786	3.09
16.13	6.816	8.424	4.986	5.165	4.217	3.702	3.24
16.14	6.568	9.423	5.445	5.015	4.319	3.722	2.77
16.15	7.072	8.667	4.986	5.13	4.217	3.801	3.58
16.16	7.032	8.172	5.184	5.605	4.253	3.642	2.96
16.17	7.272	7.794	5.13	5.005	4.284	3.708	2.96
16.18	7.16	8.01	5.166	4.355	4.192	3.682	2.89
16.19	6.744	7.641	5.238	4.35	4.178	3.661	3.96
16.2	6.504	7.722	5.319	4.78	4.13	3.69	3.64
16.21	6.536	8.442	5.49	4.645	4.175	3.721	2.73
16.22	6.616	8.874	5.22	5.105	4.129	3.693	3.01
16.23	6.848	7.992	5.481	4.735	4.23	3.732	3.05
16.24	7.032	7.812	5.292	4.8	4.213	3.683	2.88
16.25	6.728	7.866	4.968	4.595	4.249	3.679	2.6
16.26	7.016	8.226	5.67	5.155	4.039	3.609	2.81
16.27	6.696	7.641	4.878	4.905	4.151	3.661	2.87
16.28	7.04	7.812	5.184	4.66	4.014	3.635	2.69
16.29	7.096	7.83	5.391	4.925	4.166	3.678	2.75
16.3	6.792	7.443	5.49	4.66	4.191	3.728	2.78
16.31	6.552	7.866	5.427	4.63	4.263	3.721	3.05
16.32	7.296	7.245	5.535	4.535	4.18	3.758	2.91
16.33	6.56	7.29	5.157	4.55	4.027	3.585	3.25
16.34	6.664	6.732	5.508	4.59	4.237	3.763	2.88
16.35	6.68	7.101	5.319	4.82	4.233	3.77	3.56
16.36	7.056	8.217	5.184	4.85	4.157	3.682	2.81
16.37	7.152	8.001	5.184	4.68	4.093	3.646	3.01
16.38	6.648	7.605	5.346	4.68	4.105	3.634	3.18
16.39	6.576	7.659	5.031	4.415	4.183	3.681	2.75
16.4	6.44	8.091	5.076	5.22	4.118	3.644	2.86
16.41	6.512	8.055	4.887	5.43	4.135	3.716	2.74
16.42	6.208	7.38	5.409	4.415	4.12	3.641	2.73
16.43	6.44	7.128	5.526	4.14	4.098	3.711	2.78
16.44	6.248	7.173	5.607	4.505	4.022	3.702	2.77
16.45	6.344	7.596	5.868	4.215	4.019	3.563	2.81
16.46	7.856	8.082	5.166	4.625	4.054	3.586	2.81
16.47	7.44	7.911	5.427	4.405	4.236	3.638	3.18
16.48	7.808	8.019	4.968	4.655	4.196	3.623	3.08
16.49	7.504	7.677	5.283	4.305	4.254	3.721	3.42
16.5	7.656	7.929	5.355	4.625	4.098	3.746	2.87
16.51	7.328	7.587	5.418	4.765	4.153	3.642	2.87
16.52	7.08	7.308	5.562	4.51	4.149	3.662	2.96
16.53	7.8	7.398	5.508	4.435	4.101	3.722	2.96
16.54	7.248	7.074	5.157	4.51	4.175	3.653	3.01
16.55	7.24	7.308	5.634	5.025	4.113	3.679	2.95
16.56	7.072	7.938	5.544	4.715	4.245	3.77	2.86
16.57	6.216	7.659	5.562	4.545	4.242	3.687	2.87
16.58	6.56	8.118	5.238	4.565	4.215	3.724	2.69
16.59	6.464	7.182	5.256	4.545	4.223	3.677	2.93
16.6	6.728	7.713	5.4	4.365	4.28	3.631	2.85
16.61	6.504	8.541	5.904	5.32	4.251	3.741	2.85
16.62	7.12	8.262	5.427	4.535	4.242	3.741	3.22
16.63	6.68	8.496	5.418	4.525	4.124	3.72	2.91
16.64	6.864	8.46	5.418	4.445	3.988	3.685	2.69
16.65	6.816	7.731	5.175	4.885	4.064	3.661	2.81
16.66	6.592	7.686	5.292	4.67	4.163	3.633	2.81
16.67	6.032	7.785	5.436	4.755	4.133	3.644	2.69
16.68	6.968	7.929	5.121	4.93	4.135	3.657	2.75
16.69	6.368	8.118	5.571	4.985	4.192	3.7	2.73
16.7	6.096	7.515	5.157	4.7	4.207	3.699	2.92
16.71	6.16	7.839	5.166	4.665	4.226	3.692	2.85
16.72	5.664	7.659	5.454	4.735	4.386	3.718	3.07
16.73	6.44	7.335	5.553	4.72	4.274	3.755	2.96
16.74	6.56	7.632	5.292	4.7	4.197	3.568	3.15
16.75	6.112	7.407	5.292	4.65	4.252	3.764	2.96
16.76	5.928	7.011	5.445	4.87	4.276	3.706	2.79
16.77	6.432	8.181	5.391	5.385	4.29	3.694	3.05
16.78	6.64	7.182	5.589	4.86	4.183	3.704	2.94
16.79	6.112	7.209	5.436	5.015	4.227	3.649	2.74
16.8	6.592	7.947	5.121	4.985	4.28	3.798	2.91
16.81	6.968	7.209	5.058	4.765	4.138	3.681	2.83
16.82	7.416	7.362	5.544	4.94	4.06	3.576	2.8
16.83	7.336	7.209	5.148	4.745	4.245	3.68	2.78
16.84	7.312	7.101	5.31	4.43	4.198	3.72	2.95
16.85	6.552	7.785	5.427	4.65	4.245	3.614	3.04
16.86	6.28	7.488	4.851	4.86	4.214	3.678	2.81
16.87	6.016	7.866	5.166	4.885	4.228	3.724	2.98
16.88	6.336	7.884	5.319	4.885	4.311	3.74	2.73
16.89	6.32	7.245	5.049	4.955	4.3	3.786	2.96
16.9	6.176	7.506	5.4	4.815	4.143	3.682	2.98
16.91	6.112	6.966	5.238	4.45	4.233	3.647	3.07
16.92	6.096	6.894	5.139	4.785	4.156	3.698	2.98
16.93	6.256	7.461	5.22	4.825	4.181	3.617	2.94
16.94	6.576	7.362	5.202	5.065	4.165	3.686	2.91
16.95	6.472	7.281	5.319	4.665	4.173	3.73	2.8
16.96	5.68	7.056	5.13	4.875	4.206	3.683	2.99
16.97	6.04	7.065	5.013	5.02	4.119	3.672	3.05
16.98	6.064	8.1	5.301	4.98	4.171	3.676	2.97
16.99	6.48	7.821	5.184	5.04	4.107	3.648	2.88
17	6.072	7.326	5.166	4.595	4.186	3.611	2.92
17.01	6.624	7.236	5.085	4.905	4.322	3.682	2.99
17.02	6.44	7.722	5.454	4.885	4.291	3.713	2.87
17.03	6.008	7.542	4.923	4.98	4.144	3.658	2.77
17.04	6.096	6.885	5.4	4.745	4.017	3.645	2.73
17.05	6.328	7.767	5.202	5.2	4.29	3.758	2.79
17.06	6.472	7.092	5.211	4.85	4.166	3.736	3.42
17.07	6.232	7.056	5.562	5.195	4.188	3.641	2.96
17.08	5.728	6.768	5.004	4.82	4.199	3.669	3.06
17.09	6.36	7.659	5.58	4.79	4.238	3.727	2.89
17.1	6.448	6.885	5.031	4.765	4.144	3.682	2.79
17.11	6.16	7.659	5.166	4.805	4.192	3.667	2.88
17.12	6.328	7.632	4.923	4.735	4.109	3.837	2.99
17.13	6.168	7.65	5.121	5.185	4.061	3.614	2.91
17.14	5.696	7.461	5.166	4.11	4.144	3.766	3.11
17.15	6.256	7.785	5.157	5.06	3.995	3.679	3
17.16	6.416	7.2	4.914	4.42	4.117	3.695	3.12
17.17	6.048	7.992	5.139	4.97	4.121	3.678	2.91
17.18	6.312	6.903	5.175	4.365	4.081	3.607	3.15
17.19	6.496	7.47	5.148	4.965	4.297	3.751	2.87
17.2	6.544	7.281	5.211	4.885	4.287	3.637	2.97
17.21	6.624	6.984	5.355	4.655	4.205	3.667	3.13
17.22	6.36	6.93	5.229	4.86	4.058	3.675	3.1
17.23	6.232	7.038	5.166	4.715	4.084	3.659	2.82
17.24	6.208	7.155	5.508	4.485	3.969	3.638	2.92
17.25	6.312	7.38	5.175	4.87	4.093	3.733	3.03
17.26	6.808	7.56	5.211	4.83	4.256	3.685	2.86
17.27	6.28	7.587	5.175	4.41	4.134	3.73	2.77
17.28	7.4	7.326	5.508	4.635	3.946	3.61	3.31
17.29	7.144	7.344	5.508	4.675	4.232	3.743	3.03
17.3	6.752	7.875	4.833	5.045	4.135	3.667	2.83
17.31	6.728	7.623	5.364	4.75	4.178	3.784	2.95
17.32	6.464	7.515	5.04	4.665	3.991	3.599	3
17.33	7.616	6.93	5.22	4.575	4.074	3.672	2.9
17.34	6.592	7.254	5.319	4.99	4.123	3.559	2.72
17.35	5.936	6.894	4.932	4.77	4.125	3.593	2.83
17.36	6.376	7.524	5.157	4.68	4.191	3.693	2.86
17.37	6.84	7.641	5.4	4.95	4.162	3.695	3.05
17.38	6.48	7.29	5.22	4.81	4.123	3.632	3.21
17.39	6.176	7.659	5.544	5.2	4.172	3.625	2.91
17.4	6.64	7.29	5.562	4.945	4.18	3.688	2.88
17.41	7.84	7.713	5.346	4.76	4.259	3.698	3.16
17.42	6.752	7.299	4.905	4.8	4.239	3.722	2.69
17.43	7.088	7.155	5.274	4.855	4.125	3.75	2.94
17.44	6.672	6.867	5.391	4.825	4.232	3.708	2.86
17.45	7.544	6.651	5.166	4.6	4.163	3.737	3.39
17.46	6.376	7.884	5.157	5.035	4.183	3.644	3.08
17.47	6.824	7.011	5.247	5.035	4.286	3.798	2.91
17.48	7.056	7.992	5.166	5.16	4.119	3.644	2.93
17.49	7.104	7.524	5.175	4.805	4.156	3.778	3.06
17.5	6.728	6.966	5.418	4.715	4.115	3.637	3.16
17.51	6.848	7.605	4.968	4.93	4.101	3.611	3.28
17.52	6.904	6.975	5.22	4.615	4.115	3.657	2.74
17.53	6.824	7.218	5.04	4.89	4.029	3.631	2.68
17.54	7.152	7.254	5.193	4.765	4.064	3.69	2.76
17.55	6.856	7.182	5.355	4.54	4.27	3.822	2.8
17.56	7.616	7.92	5.22	5.09	4.127	3.727	2.94
17.57	7.088	8.325	5.373	4.935	4.203	3.679	2.92
17.58	7.528	7.407	5.157	4.91	4.201	3.616	3.14
17.59	7.128	7.641	5.283	5.19	4.236	3.678	2.95
17.6	7.392	8.604	5.355	4.91	4.174	3.644	3.16
17.61	7.52	7.317	5.211	5.045	4.059	3.629	2.76
17.62	7.064	7.299	5.229	4.81	4.165	3.67	3.05
17.63	7.272	7.902	5.463	4.675	4.107	3.646	2.73
17.64	7.64	7.479	4.797	5.03	4.281	3.657	3.75
17.65	7.544	7.713	5.274	4.67	4.218	3.62	2.92
17.66	7.752	7.47	5.193	4.575	4.278	3.723	3.09
17.67	7.488	7.839	5.508	4.505	4.016	3.669	2.74
17.68	7	7.272	5.499	4.515	4.19	3.559	3.62
17.69	6.44	7.164	4.842	4.28	4.332	3.668	2.8
17.7	7.16	7.623	5.364	4.805	4.344	3.617	3.02
17.71	7.88	7.812	4.905	4.85	4.373	3.725	2.76
17.72	7.528	7.479	5.391	4.53	4.297	3.753	3.15
17.73	7.368	7.884	5.328	4.68	4.095	3.63	2.9
17.74	7.864	7.551	5.076	4.675	4.13	3.616	3.08
17.75	7.104	7.884	5.175	4.995	4.095	3.793	3.06
17.76	7.72	8.082	5.148	5.165	4.204	3.649	2.81
17.77	7.704	7.965	5.328	4.87	4.233	3.756	2.83
17.78	8.176	7.533	4.815	5.14	4.268	3.699	2.97
17.79	7.296	7.245	5.481	4.86	4.2	3.671	2.74
17.8	7.904	7.551	5.247	4.61	4.313	3.698	2.84
17.81	7.368	7.344	5.337	4.495	4.188	3.685	3.04
17.82	7.624	7.146	5.373	4.395	4.304	3.761	3.06
17.83	7.456	7.533	5.418	4.68	4.141	3.683	2.73
17.84	8.064	7.425	5.472	5.535	4.231	3.703	3.01
17.85	7.488	7.218	5.157	4.8	4.146	3.656	2.92
17.86	7.04	7.587	4.887	4.885	4.317	3.718	2.91
17.87	6.68	7.731	5.058	4.82	4.326	3.712	3.11
17.88	7.112	7.65	5.454	5.02	4.146	3.672	3.14
17.89	7.208	7.029	5.256	5.07	4.165	3.65	2.81
17.9	6.696	6.786	5.139	4.65	4.181	3.702	2.72
17.91	7.392	7.182	5.373	4.725	4.088	3.679	3.14
17.92	7.256	7.623	5.076	4.86	4.029	3.66	2.72
17.93	7.944	7.263	5.148	4.87	4.229	3.639	2.88
17.94	8.184	7.956	5.31	4.535	4.153	3.671	2.78
17.95	7.416	6.84	5.13	4.58	4.178	3.663	2.97
17.96	8.064	7.578	5.121	4.795	4.176	3.671	2.86
17.97	8.048	7.299	4.968	5.17	4.174	3.586	2.94
17.98	8.336	7.839	5.13	4.97	4.074	3.65	2.96
17.99	7.928	7.659	5.049	4.815	3.929	3.696	2.74
18	7.992	7.335	5.193	5.025	4.141	3.755	3.24
18.01	8.456	7.875	5.139	5.035	4.055	3.658	2.75
18.02	7.968	7.893	5.427	4.97	4.114	3.703	2.71
18.03	7.424	7.443	5.373	5.405	4.148	3.659	3.04
18.04	7.512	7.272	4.977	4.845	4.19	3.703	3.04
18.05	9.112	6.885	5.184	4.745	4.162	3.654	2.85
18.06	9.08	7.344	5.346	4.61	4.074	3.606	2.64
18.07	9.136	7.821	5.094	4.84	4.061	3.647	3.1
18.08	8.816	7.533	5.409	5.045	4.114	3.646	3.33
18.09	8.952	7.812	5.562	4.73	4.316	3.815	3.28
18.1	9.136	7.866	5.445	4.395	4.169	3.726	3.5
18.11	9.152	7.146	5.553	5	4.178	3.651	3.54
18.12	9.048	7.776	5.373	4.69	4.149	3.676	2.71
18.13	9.024	7.83	5.166	4.68	4.146	3.71	2.76
18.14	8.848	7.443	5.139	4.595	4.093	3.658	2.91
18.15	8.592	8.217	5.139	4.73	4	3.639	3.52
18.16	8.808	7.38	5.085	4.74	4.123	3.668	3.12
18.17	8.896	7.524	5.409	4.4	4.168	3.676	2.98
18.18	8.816	7.047	5.238	4.64	4.287	3.764	3.29
18.19	8.896	6.912	5.274	4.235	4.159	3.674	2.91
18.2	8.816	7.731	5.787	4.585	4.308	3.703	2.96
18.21	8.872	8.19	5.229	4.7	4.208	3.753	2.92
18.22	8.56	7.605	5.148	4.895	4.005	3.633	2.74
18.23	8.68	7.542	5.274	5.185	4.055	3.675	3.18
18.24	8.848	7.182	5.319	4.8	4.078	3.63	2.9
18.25	9.104	7.191	5.292	4.89	4.275	3.732	3.07
18.26	8.856	8.1	5.436	4.89	4.252	3.68	3.12
18.27	9.104	7.974	5.013	5.1	4.258	3.741	2.92
18.28	9.176	7.47	5.094	4.835	4.144	3.598	2.77
18.29	8.832	7.848	5.265	5.045	4.06	3.636	2.97
18.3	8.872	8.307	5.292	4.7	4.291	3.73	2.89
18.31	9.2	7.425	5.103	4.86	4.203	3.62	2.72
18.32	8.592	8.658	5.13	4.91	4.303	3.746	2.85
18.33	9.008	8.136	5.445	4.71	4.266	3.745	2.77
18.34	8.76	7.983	4.86	4.825	4.272	3.689	2.89
18.35	8.384	7.641	5.238	5.05	4.193	3.707	3.08
18.36	8.88	6.984	5.229	4.72	4.14	3.682	2.92
18.37	8.88	8.091	5.247	5.1	4.208	3.634	3.34
18.38	8.64	7.65	5.481	4.905	4.237	3.734	2.99
18.39	8.528	7.002	5.229	4.545	4.204	3.718	2.86
18.4	8.688	7.947	5.499	4.605	4.334	3.726	2.78
18.41	8.608	7.677	5.409	4.885	4.138	3.692	2.7
18.42	8.816	7.947	5.193	5.12	4.123	3.651	2.68
18.43	8.88	7.929	5.139	4.665	4.292	3.822	2.88
18.44	8.72	8.343	5.364	4.73	4.217	3.683	2.83
18.45	8.584	8.001	5.094	4.825	4.141	3.644	3.04
18.46	8.896	7.659	5.085	4.58	4.184	3.78	2.86
18.47	8.616	7.902	5.229	4.26	4.119	3.654	2.99
18.48	8.848	7.38	5.508	4.42	4.301	3.812	2.84
18.49	8.648	7.92	5.04	5.145	4.291	3.647	2.77
18.5	8.88	7.623	5.076	4.75	4.129	3.639	3.07
18.51	8.72	7.884	5.355	4.645	4.21	3.667	2.95
18.52	8.912	7.533	5.499	4.375	4.218	3.651	2.96
18.53	8.752	7.767	5.265	4.78	4.207	3.672	2.82
18.54	8.888	8.559	5.202	5.03	4.151	3.584	3.17
18.55	8.872	7.965	5.184	4.77	4.265	3.648	2.97
18.56	8.688	8.721	5.346	5.265	4.234	3.651	3.07
18.57	8.776	8.433	5.094	5.07	4.299	3.706	2.78
18.58	8.8	8.64	5.463	5.11	4.312	3.689	3.06
18.59	8.88	8.748	5.04	4.79	4.376	3.773	3.3
18.6	8.92	8.325	5.319	4.55	4.273	3.697	3.27
18.61	8.48	8.55	5.103	4.82	4.199	3.638	2.73
18.62	8.72	7.524	4.815	4.625	4.153	3.646	2.82
18.63	8.68	7.56	5.391	4.525	4.276	3.667	2.64
18.64	8.584	8.091	5.067	4.865	4.217	3.661	3.44
18.65	8.608	7.848	5.589	4.205	4.2	3.68	3.27
18.66	8.856	8.028	5.355	4.86	4.213	3.725	2.97
18.67	8.888	8.037	5.265	5.045	4.229	3.682	2.66
18.68	8.376	7.749	5.445	4.975	4.204	3.717	2.72
18.69	8.6	7.29	5.517	4.76	4.175	3.674	2.77
18.7	8.864	7.659	5.292	4.62	4.117	3.656	2.89
18.71	8.8	7.794	4.779	4.865	4.238	3.677	2.83
18.72	8.848	7.758	5.436	4.475	4.213	3.695	2.89
18.73	8.808	7.524	5.607	4.785	4.173	3.699	2.9
18.74	8.552	7.92	5.508	4.635	4.26	3.734	2.75
18.75	8.888	8.154	5.553	4.41	4.143	3.659	2.97
18.76	8.68	7.785	5.247	4.85	4.164	3.607	2.99
18.77	8.664	7.569	5.454	4.86	4.122	3.679	2.9
18.78	8.84	7.875	5.112	4.75	4.145	3.609	2.85
18.79	8.904	7.605	5.265	4.6	4.118	3.67	2.72
18.8	8.696	7.749	5.022	4.825	4.152	3.632	2.88
18.81	8.704	7.218	5.238	4.495	4.136	3.754	2.75
18.82	8.4	7.002	5.355	4.64	4.374	3.715	2.9
18.83	8.776	7.182	5.373	4.51	4.318	3.726	3.6
18.84	8.888	7.875	5.085	4.46	4.245	3.749	2.8
18.85	9.024	7.821	5.454	4.755	4.248	3.634	2.8
18.86	9.008	6.93	5.346	4.5	4.128	3.647	2.83
18.87	9.048	7.578	5.022	4.65	4.199	3.647	2.98
18.88	8.672	7.272	5.427	4.815	4.18	3.668	2.76
18.89	8.856	7.56	5.652	4.39	4.08	3.571	2.94
18.9	8.68	6.921	5.031	4.605	4.035	3.68	3.17
18.91	8.856	7.992	5.589	4.555	4.327	3.705	2.97
18.92	8.92	6.732	5.274	4.63	4.243	3.734	2.64
18.93	8.816	7.209	5.004	4.035	4.174	3.671	2.81
18.94	8.864	7.731	5.238	4.555	4.346	3.723	3.42
18.95	9.008	7.308	5.283	4.615	4.316	3.793	3.36
18.96	8.992	7.083	5.346	4.73	4.326	3.754	2.66
18.97	8.824	7.047	5.382	4.68	4.282	3.706	2.65
18.98	8.856	6.876	5.508	4.38	4.289	3.677	2.88
18.99	9.104	7.2	5.508	4.69	4.17	3.662	2.8
19	8.872	7.344	5.562	4.41	4.27	3.6	3.05
19.01	8.896	7.164	5.661	4.59	4.298	3.718	3.09
19.02	8.72	7.821	5.292	4.245	4.212	3.667	2.96
19.03	8.4	8.091	5.355	4.375	4.231	3.693	2.96
19.04	8.784	6.975	5.418	4.155	4.393	3.746	3
19.05	8.864	7.839	5.751	4.54	4.365	3.706	3.36
19.06	9.04	7.668	5.346	4.98	4.396	3.681	3.53
19.07	8.672	7.29	5.247	4.755	4.391	3.742	2.94
19.08	8.784	8.064	5.643	4.52	4.391	3.727	2.9
19.09	8.984	7.812	5.391	4.65	4.33	3.699	2.75
19.1	8.88	8.082	5.22	4.74	4.181	3.76	2.95
19.11	9.016	7.362	5.175	4.24	4.215	3.669	2.79
19.12	8.872	7.929	5.229	4.295	4.377	3.759	2.8
19.13	8.672	7.938	5.265	4.57	4.213	3.706	2.8
19.14	8.944	7.695	5.571	4.2	4.066	3.733	2.85
19.15	9.032	7.281	5.76	4.665	4.141	3.709	2.83
19.16	8.52	7.209	5.058	4.25	4.178	3.694	2.83
19.17	9.072	7.632	5.508	4.645	4.191	3.763	2.71
19.18	8.792	7.416	5.616	4.485	4.279	3.69	2.76
19.19	8.872	7.848	5.238	4.43	4.237	3.679	3.29
19.2	8.928	7.38	5.184	4.365	4.31	3.849	2.77
19.21	9.096	7.587	5.22	4.28	4.284	3.878	3.03
19.22	8.84	7.902	5.247	4.355	4.136	3.847	2.71
19.23	9.056	8.469	5.391	4.51	4.27	3.81	3.02
19.24	9.072	7.515	5.148	4.21	4.139	3.675	3.22
19.25	8.896	7.227	5.265	4.245	4.254	3.772	2.73
19.26	9.088	7.596	5.013	4.345	4.12	3.597	2.88
19.27	9.056	7.902	5.643	4.835	4.134	3.715	2.83
19.28	8.872	7.911	5.058	4.41	4.194	3.675	3.14
19.29	9	8.046	5.481	4.75	4.174	3.794	2.66
19.3	8.872	8.109	5.247	4.82	4.201	3.612	3.18
19.31	9.016	7.209	5.904	4.8	4.251	3.657	3.14
19.32	8.752	7.173	5.22	4.57	4.238	3.669	2.99
19.33	8.96	7.56	5.175	4.91	4.35	3.741	2.72
19.34	8.952	8.01	5.193	4.6	4.262	3.663	2.94
19.35	9.024	7.983	5.373	4.66	4.121	3.575	3.04
19.36	8.816	8.433	5.319	4.535	4.195	3.742	2.97
19.37	9.056	8.199	5.184	4.75	4.256	3.781	3.12
19.38	8.92	8.163	5.139	4.64	4.359	3.717	3.06
19.39	8.576	7.353	5.148	4.555	4.299	3.679	3.08
19.4	8.744	8.154	5.715	4.63	4.18	3.764	2.83
19.41	8.856	7.344	5.535	4.395	4.283	3.702	3
19.42	8.808	8.037	5.535	4.7	4.271	3.711	3.08
19.43	9.016	7.83	5.499	4.53	4.17	3.647	2.78
19.44	8.992	7.758	5.427	4.585	4.229	3.676	2.95
19.45	8.968	8.244	5.652	4.66	4.27	3.658	2.94
19.46	9.056	7.947	5.193	4.865	4.381	3.722	2.83
19.47	9.032	6.966	5.22	4.325	4.309	3.71	2.82
19.48	8.864	8.307	5.184	5.12	4.348	3.662	3.13
19.49	8.576	7.974	5.193	4.45	4.203	3.604	2.8
19.5	8.888	8.586	5.193	4.71	4.136	3.637	3.22
19.51	8.776	8.055	5.292	4.535	4.054	3.6	3.01
19.52	8.776	8.109	5.22	4.605	4.137	3.646	2.84
19.53	8.808	7.902	5.445	5.09	4.151	3.673	2.82
19.54	9.024	7.902	5.436	4.97	4.104	3.615	2.88
19.55	8.8	6.876	5.211	4.515	4.197	3.728	3
19.56	8.68	8.037	5.472	4.415	4.093	3.643	3.29
19.57	8.704	8.181	5.238	4.715	4.319	3.648	3.05
19.58	8.784	7.173	5.31	4.48	4.132	3.567	3
19.59	8.712	7.56	5.472	4.825	4.305	3.761	3.33
19.6	8.456	6.948	5.418	4.315	4.197	3.698	3.29
19.61	8.808	6.651	5.4	4.385	4.143	3.676	2.78
19.62	8.888	7.182	5.706	4.795	4.192	3.7	2.95
19.63	9.032	6.741	5.409	4.585	4.078	3.706	2.75
19.64	8.68	7.2	5.193	4.53	4.153	3.599	2.79
19.65	8.936	7.704	5.328	4.015	4.207	3.657	3.48
19.66	8.904	6.903	5.463	4.37	4.104	3.63	2.76
19.67	8.816	6.957	5.544	4.615	4.213	3.69	2.86
19.68	8.8	7.236	5.247	4.4	4.292	3.747	3.21
19.69	8.848	7.443	5.364	4.145	4.295	3.75	3.16
19.7	8.864	7.137	5.364	4.55	4.25	3.778	3.14
19.71	8.736	7.371	5.436	4.025	4.194	3.666	2.72
19.72	8.816	6.669	5.139	4.37	4.159	3.608	3.34
19.73	8.76	7.056	5.436	4.53	4.197	3.682	2.78
19.74	8.88	7.038	5.589	4.445	4.156	3.617	3.01
19.75	8.752	6.804	4.86	4.73	4.172	3.684	2.73
19.76	8.792	6.786	5.436	4.22	4.201	3.604	2.84
19.77	8.872	6.786	5.454	4.54	4.176	3.659	3.4
19.78	8.624	7.407	5.346	4.27	4.168	3.674	3.17
19.79	8.856	6.939	5.409	4.56	4.198	3.605	3.2
19.8	9.12	6.624	5.571	4.3	4.232	3.663	2.79
19.81	8.864	7.164	5.328	4.595	4.171	3.756	3.28
19.82	8.96	7.191	5.661	4.375	4.167	3.667	2.77
19.83	8.832	7.191	5.607	4.515	4.286	3.659	3.24
19.84	8.72	7.119	5.121	4.56	4.269	3.761	3.01
19.85	8.696	7.074	5.391	4.555	4.207	3.709	3.01
19.86	8.944	7.2	5.238	4.695	4.1	3.641	3.21
19.87	8.664	7.686	5.391	4.55	4.192	3.695	2.73
19.88	8.904	7.101	4.842	4.485	4.328	3.779	3.09
19.89	8.672	6.903	5.481	4.345	4.214	3.682	2.9
19.9	8.776	7.056	5.247	4.445	4.198	3.665	2.79
19.91	8.464	6.786	5.355	4.835	4.212	3.669	2.92
19.92	8.728	6.93	5.229	4.785	4.247	3.711	3.03
19.93	8.792	6.93	5.193	4.625	4.135	3.584	2.89
19.94	8.792	6.993	5.292	4.405	4.187	3.639	2.84
19.95	8.968	7.371	5.571	4.59	4.201	3.66	3.02
19.96	8.8	6.768	5.085	4.65	4.213	3.662	2.79
[truncated: 8,004 more rows]

## Sheet: Fig3B
Time (ns)	N (NADPH)-T53	N (NADPH)-Y55		Time (ns)	Y430 (MuDhcr7)-C7=C8	Y317 (WTDhcr7)-C7=C8	Y430 (MuDhcr7)-C7=C8
0	3.73	4.838		0	4.433	4.911	5.039
0.01	3.86	4.911		0.01	4.582	5.267	5.195
0.02	3.75	4.822		0.02	4.528	5.203	5.144
0.03	3.76	4.764		0.03	4.575	5.158	5.181
0.04	3.84	4.836		0.04	4.622	5.311	5.194
0.05	3.82	4.788		0.05	4.576	5.153	5.119
0.06	3.87	4.768		0.06	4.61	5.154	5.13
0.07	3.83	4.751		0.07	4.463	5.208	5.123
0.08	3.81	4.837		0.08	4.602	5.22	5.194
0.09	3.83	4.783		0.09	4.623	5.057	5.263
0.1	3.88	4.772		0.1	4.569	5.116	5.195
0.11	3.87	4.836		0.11	4.524	5.125	5.184
0.12	3.97	4.883		0.12	4.59	5.29	5.243
0.13	3.79	4.8		0.13	4.573	5.073	5.104
0.14	3.86	4.816		0.14	4.541	5.149	5.194
0.15	3.83	4.782		0.15	4.53	5.102	5.101
0.16	3.79	4.854		0.16	4.539	5.25	5.063
0.17	3.85	4.743		0.17	4.544	5.215	5.089
0.18	3.82	4.782		0.18	4.467	5.053	4.964
0.19	3.9	4.797		0.19	4.5	4.98	4.987
0.2	3.79	4.79		0.2	4.432	5.067	5.039
0.21	3.87	4.842		0.21	4.523	4.972	5.033
0.22	3.81	4.798		0.22	4.491	4.912	5.003
0.23	3.82	4.753		0.23	4.468	4.945	5.028
0.24	3.82	4.821		0.24	4.525	5.048	5.053
0.25	3.86	4.896		0.25	4.573	5.072	5.135
0.26	3.87	4.788		0.26	4.495	5.057	4.995
0.27	3.89	4.773		0.27	4.51	5.182	5.126
0.28	3.79	4.732		0.28	4.466	4.995	5.106
0.29	3.84	4.818		0.29	4.568	5.197	5.143
0.3	3.71	4.807		0.3	4.516	5.225	5.116
0.31	3.89	4.809		0.31	4.511	5.027	5.079
0.32	3.77	4.78		0.32	4.558	5.101	5.126
0.33	3.88	4.812		0.33	4.438	4.958	5.025
0.34	3.95	4.764		0.34	4.478	4.904	5.111
0.35	3.87	4.785		0.35	4.491	4.825	5.026
0.36	3.88	4.857		0.36	4.546	4.808	5.014
0.37	3.75	4.868		0.37	4.538	4.708	5.026
0.38	3.9	4.809		0.38	4.531	4.736	5.071
0.39	3.86	4.822		0.39	4.513	4.707	5.005
0.4	3.94	4.837		0.4	4.479	4.695	4.992
0.41	3.86	4.815		0.41	4.418	4.622	4.947
0.42	3.83	4.765		0.42	4.385	4.636	4.908
0.43	3.82	4.84		0.43	4.432	4.728	4.978
0.44	3.81	4.84		0.44	4.463	4.709	4.961
0.45	3.78	4.777		0.45	4.485	4.61	4.933
0.46	3.8	4.82		0.46	4.504	4.769	4.977
0.47	3.88	4.734		0.47	4.454	4.539	4.833
0.48	3.86	4.834		0.48	4.491	4.688	4.966
0.49	3.85	4.801		0.49	4.512	4.703	4.968
0.5	3.81	4.752		0.5	4.411	4.841	4.915
0.51	3.87	4.766		0.51	4.484	4.818	4.962
0.52	3.78	4.835		0.52	4.46	4.825	4.894
0.53	3.7	4.78		0.53	4.415	4.804	4.894
0.54	3.96	4.792		0.54	4.447	4.879	4.952
0.55	3.87	4.746		0.55	4.436	4.845	4.933
0.56	3.8	4.825		0.56	4.445	4.81	4.941
0.57	3.91	4.843		0.57	4.45	4.789	4.908
0.58	3.8	4.779		0.58	4.447	4.805	4.902
0.59	3.89	4.82		0.59	4.406	4.837	4.929
0.6	3.86	4.772		0.6	4.433	4.699	4.883
0.61	3.84	4.806		0.61	4.43	4.896	4.994
0.62	3.8	4.742		0.62	4.387	4.84	4.892
0.63	3.87	4.776		0.63	4.444	4.848	4.912
0.64	3.92	4.755		0.64	4.446	4.723	4.941
0.65	3.83	4.842		0.65	4.445	4.829	4.989
0.66	3.86	4.772		0.66	4.43	4.831	5.006
0.67	3.77	4.7		0.67	4.515	4.904	4.908
0.68	3.85	4.797		0.68	4.397	4.876	4.947
0.69	3.89	4.808		0.69	4.375	4.793	4.848
0.7	3.8	4.753		0.7	4.441	4.801	4.895
0.71	3.82	4.799		0.71	4.438	4.877	4.955
0.72	3.77	4.797		0.72	4.475	4.924	4.933
0.73	3.88	4.84		0.73	4.472	4.817	4.988
0.74	3.85	4.79		0.74	4.419	4.671	4.956
0.75	3.76	4.81		0.75	4.435	4.679	4.937
0.76	3.9	4.832		0.76	4.458	4.762	5.038
0.77	3.84	4.839		0.77	4.415	4.705	4.912
0.78	3.73	4.847		0.78	4.416	4.618	4.895
0.79	3.78	4.759		0.79	4.336	4.515	4.881
0.8	3.8	4.802		0.8	4.348	4.625	4.924
0.81	3.82	4.708		0.81	4.385	4.538	4.915
0.82	3.87	4.754		0.82	4.336	4.499	4.896
0.83	3.87	4.884		0.83	4.522	4.779	5.058
0.84	3.79	4.854		0.84	4.362	4.569	4.914
0.85	3.83	4.774		0.85	4.372	4.708	4.949
0.86	3.81	4.787		0.86	4.37	4.585	4.881
0.87	3.89	4.846		0.87	4.394	4.654	4.938
0.88	3.84	4.746		0.88	4.399	4.547	4.928
0.89	3.93	4.798		0.89	4.361	4.523	4.867
0.9	3.95	4.858		0.9	4.482	4.586	4.945
0.91	3.89	4.862		0.91	4.489	4.638	4.962
0.92	3.83	4.76		0.92	4.399	4.595	4.908
0.93	3.83	4.716		0.93	4.31	4.616	4.844
0.94	3.94	4.811		0.94	4.423	4.718	4.946
0.95	3.92	4.824		0.95	4.37	4.502	4.897
0.96	3.89	4.755		0.96	4.403	4.773	4.921
0.97	3.84	4.746		0.97	4.462	4.792	4.949
0.98	3.89	4.772		0.98	4.412	4.723	4.932
0.99	3.82	4.797		0.99	4.391	4.72	4.96
1	3.78	4.842		1	4.508	4.733	4.887
1.01	3.9	4.76		1.01	4.414	4.871	4.932
1.02	3.88	4.811		1.02	4.449	4.811	4.931
1.03	3.77	4.757		1.03	4.479	4.953	4.982
1.04	3.87	4.788		1.04	4.448	4.75	4.924
1.05	3.78	4.759		1.05	4.404	4.718	4.909
1.06	3.75	4.857		1.06	4.483	4.734	5.028
1.07	3.94	4.897		1.07	4.477	4.707	4.991
1.08	3.84	4.813		1.08	4.485	4.773	4.995
1.09	3.87	4.804		1.09	4.439	4.829	4.993
1.1	3.81	4.775		1.1	4.403	4.827	4.988
1.11	3.81	4.794		1.11	4.418	4.833	5.012
1.12	3.91	4.868		1.12	4.468	4.829	5.046
1.13	3.84	4.91		1.13	4.503	4.866	5.01
1.14	3.91	4.756		1.14	4.451	4.879	5.065
1.15	3.76	4.806		1.15	4.403	4.796	4.972
1.16	3.87	4.85		1.16	4.49	4.882	5.018
1.17	3.8	4.812		1.17	4.431	4.693	5.003
1.18	3.93	4.859		1.18	4.449	4.723	5.061
1.19	3.82	4.787		1.19	4.49	4.705	4.991
1.2	3.89	4.772		1.2	4.467	4.719	5.031
1.21	3.86	4.882		1.21	4.487	4.702	5.084
1.22	3.77	4.851		1.22	4.485	4.8	5.145
1.23	3.83	4.755		1.23	4.476	4.72	4.986
1.24	3.8	4.765		1.24	4.504	4.688	5.069
1.25	3.86	4.793		1.25	4.464	4.616	4.994
1.26	3.93	4.737		1.26	4.482	4.669	5.023
1.27	3.8	4.787		1.27	4.395	4.721	4.984
1.28	3.78	4.741		1.28	4.457	4.759	5.035
1.29	3.75	4.859		1.29	4.48	4.661	5.138
1.3	3.91	4.82		1.3	4.552	4.762	5.026
1.31	3.94	4.828		1.31	4.578	4.803	5.111
1.32	3.9	4.84		1.32	4.522	4.69	4.982
1.33	3.94	4.83		1.33	4.452	4.591	5.025
1.34	3.87	4.915		1.34	4.487	4.631	5.023
1.35	3.84	4.871		1.35	4.542	4.712	5.105
1.36	3.9	4.906		1.36	4.521	4.633	5.022
1.37	3.85	4.856		1.37	4.539	4.699	5.027
1.38	3.8	4.887		1.38	4.612	4.832	5.047
1.39	3.84	4.857		1.39	4.479	4.763	5.043
1.4	3.85	4.816		1.4	4.485	4.665	4.988
1.41	3.86	4.848		1.41	4.458	4.727	5.076
1.42	3.77	4.795		1.42	4.419	4.725	5.014
1.43	3.83	4.876		1.43	4.46	4.606	5.101
1.44	3.97	4.861		1.44	4.429	4.704	5.079
1.45	3.8	4.763		1.45	4.443	4.707	5.059
1.46	3.66	4.802		1.46	4.456	4.716	5.076
1.47	3.89	4.819		1.47	4.396	4.624	5.027
1.48	3.89	4.822		1.48	4.43	4.661	5.009
1.49	3.88	4.807		1.49	4.448	4.616	4.968
1.5	3.89	4.808		1.5	4.481	4.672	5.072
1.51	3.94	4.862		1.51	4.464	4.565	4.984
1.52	3.87	4.861		1.52	4.433	4.622	4.984
1.53	3.81	4.773		1.53	4.425	4.581	4.925
1.54	3.87	4.878		1.54	4.452	4.644	4.983
1.55	3.85	4.815		1.55	4.428	4.652	5.009
1.56	3.83	4.832		1.56	4.519	4.675	5.138
1.57	3.87	4.839		1.57	4.514	4.692	5.097
1.58	3.81	4.82		1.58	4.546	4.646	4.989
1.59	3.82	4.778		1.59	4.412	4.606	4.911
1.6	3.96	4.844		1.6	4.44	4.681	5.027
1.61	3.86	4.916		1.61	4.492	4.714	5.012
1.62	3.85	4.8		1.62	4.476	4.709	5.052
1.63	3.83	4.773		1.63	4.486	4.836	5.044
1.64	3.87	4.842		1.64	4.408	4.766	4.991
1.65	3.8	4.789		1.65	4.44	4.77	4.933
1.66	3.9	4.88		1.66	4.5	4.759	4.996
1.67	3.76	4.808		1.67	4.554	4.613	5.052
1.68	3.97	4.819		1.68	4.508	4.612	5.097
1.69	3.93	4.852		1.69	4.467	4.678	5.033
1.7	3.87	4.774		1.7	4.468	4.684	5.079
1.71	3.85	4.801		1.71	4.437	4.627	5.009
1.72	3.84	4.783		1.72	4.545	4.68	5.078
1.73	3.86	4.841		1.73	4.537	4.661	5.142
1.74	3.85	4.853		1.74	4.511	4.639	5.046
1.75	3.95	4.827		1.75	4.503	4.598	5.02
1.76	3.9	4.784		1.76	4.464	4.658	5.021
1.77	3.88	4.838		1.77	4.447	4.555	5.015
1.78	3.82	4.792		1.78	4.481	4.605	5.081
1.79	3.91	4.886		1.79	4.513	4.76	5.109
1.8	3.77	4.874		1.8	4.533	4.68	5.142
1.81	3.8	4.833		1.81	4.545	4.834	5.077
1.82	3.96	4.812		1.82	4.488	4.746	5.08
1.83	3.79	4.91		1.83	4.561	4.795	5.04
1.84	3.88	4.863		1.84	4.562	4.88	5.115
1.85	3.83	4.835		1.85	4.523	4.889	5.074
1.86	3.87	4.809		1.86	4.467	4.859	5.051
1.87	3.89	4.759		1.87	4.49	4.864	5.128
1.88	3.82	4.833		1.88	4.428	4.829	5.049
1.89	3.83	4.875		1.89	4.464	4.823	5.146
1.9	3.82	4.847		1.9	4.529	4.775	5.119
1.91	3.86	4.781		1.91	4.505	4.729	5.165
1.92	3.93	4.846		1.92	4.48	4.624	5.083
1.93	3.77	4.867		1.93	4.428	4.672	5.071
1.94	3.92	4.833		1.94	4.458	4.659	5.009
1.95	3.81	4.887		1.95	4.538	4.733	5.134
1.96	3.85	4.823		1.96	4.401	4.686	5.065
1.97	3.85	4.773		1.97	4.44	4.618	5.042
1.98	3.88	4.784		1.98	4.482	4.739	5.055
1.99	3.78	4.847		1.99	4.485	4.831	5.016
2	3.82	4.811		2	4.479	4.732	5.08
2.01	3.86	4.819		2.01	4.474	4.69	5.042
2.02	3.8	4.824		2.02	4.451	4.658	5.025
2.03	3.82	4.917		2.03	4.508	4.7	5.067
2.04	3.86	4.846		2.04	4.49	4.565	5.051
2.05	3.83	4.789		2.05	4.501	4.621	5.011
2.06	3.95	4.79		2.06	4.422	4.655	5.049
2.07	3.83	4.755		2.07	4.401	4.627	5.011
2.08	3.82	4.786		2.08	4.445	4.773	5.029
2.09	3.9	4.856		2.09	4.437	4.537	5.012
2.1	3.83	4.831		2.1	4.4	4.659	4.984
2.11	3.77	4.774		2.11	4.41	4.572	5.016
2.12	3.81	4.774		2.12	4.403	4.665	5.074
2.13	3.84	4.807		2.13	4.393	4.535	5.051
2.14	3.92	4.851		2.14	4.496	4.733	5.136
2.15	3.85	4.78		2.15	4.45	4.757	5.103
2.16	3.89	4.857		2.16	4.507	4.67	5.091
2.17	3.93	4.847		2.17	4.573	4.739	5.19
2.18	3.87	4.867		2.18	4.574	4.776	5.141
2.19	3.82	4.845		2.19	4.559	4.606	5.072
2.2	3.89	4.761		2.2	4.454	4.555	4.982
2.21	3.82	4.876		2.21	4.507	4.716	5.073
2.22	3.74	4.793		2.22	4.473	4.663	5.079
2.23	3.82	4.76		2.23	4.409	4.579	4.984
2.24	3.87	4.829		2.24	4.472	4.737	5.093
2.25	3.88	4.786		2.25	4.399	4.677	5.014
2.26	3.93	4.797		2.26	4.448	4.638	5.075
2.27	3.88	4.849		2.27	4.494	4.879	5.088
2.28	3.9	4.867		2.28	4.512	4.762	5.012
2.29	3.72	4.815		2.29	4.448	4.81	5.051
2.3	3.89	4.808		2.3	4.421	4.824	5.076
2.31	3.92	4.837		2.31	4.55	4.909	5.078
2.32	3.83	4.803		2.32	4.508	4.83	5.049
2.33	3.93	4.802		2.33	4.495	4.696	5.019
2.34	3.82	4.775		2.34	4.39	4.621	4.96
2.35	3.78	4.845		2.35	4.466	4.651	5.016
2.36	3.87	4.84		2.36	4.535	4.633	5.002
2.37	3.83	4.862		2.37	4.434	4.601	5
2.38	3.89	4.86		2.38	4.449	4.635	5.026
2.39	3.87	4.795		2.39	4.454	4.625	5.034
2.4	3.84	4.824		2.4	4.433	4.535	5.117
2.41	3.91	4.87		2.41	4.465	4.589	5.029
2.42	3.81	4.946		2.42	4.539	4.648	5.237
2.43	3.96	4.798		2.43	4.44	4.723	5.094
2.44	3.86	4.861		2.44	4.483	4.557	5.053
2.45	3.9	4.843		2.45	4.411	4.794	5.074
2.46	3.86	4.824		2.46	4.567	4.859	5.167
2.47	3.92	4.953		2.47	4.494	4.696	5.195
2.48	3.82	4.798		2.48	4.425	4.758	5.042
2.49	3.86	4.801		2.49	4.536	4.735	5.106
2.5	4.01	4.83		2.5	4.489	4.613	5.136
2.51	3.77	4.828		2.51	4.456	4.56	5.113
2.52	3.92	4.869		2.52	4.485	4.566	4.997
2.53	3.75	4.842		2.53	4.468	4.56	5.148
2.54	3.83	4.847		2.54	4.472	4.583	5.146
2.55	3.82	4.809		2.55	4.45	4.522	5.009
2.56	3.95	4.871		2.56	4.509	4.691	5.18
2.57	3.78	4.86		2.57	4.512	4.711	5.158
2.58	3.79	4.888		2.58	4.478	4.766	5.123
2.59	3.74	4.863		2.59	4.517	4.781	5.087
2.6	3.83	4.846		2.6	4.425	4.561	4.93
2.61	3.79	4.882		2.61	4.37	4.583	5.032
2.62	3.7	4.855		2.62	4.45	4.699	5.04
2.63	3.92	4.835		2.63	4.494	4.768	5.043
2.64	3.83	4.888		2.64	4.58	4.716	5.07
2.65	3.87	4.841		2.65	4.528	4.791	5.108
2.66	3.84	4.794		2.66	4.451	4.65	5.021
2.67	3.83	4.798		2.67	4.505	4.695	5.038
2.68	3.79	4.837		2.68	4.467	4.535	5.038
2.69	3.89	4.805		2.69	4.505	4.77	5.103
2.7	3.84	4.852		2.7	4.471	4.68	5.166
2.71	3.77	4.859		2.71	4.559	4.801	5.139
2.72	3.93	4.901		2.72	4.48	4.777	5.119
2.73	3.77	4.832		2.73	4.505	4.66	5.111
2.74	3.87	4.787		2.74	4.465	4.675	5.043
2.75	3.94	4.839		2.75	4.501	4.726	4.992
2.76	3.89	4.807		2.76	4.455	4.541	4.966
2.77	3.9	4.853		2.77	4.43	4.639	5.097
2.78	3.87	4.86		2.78	4.443	4.584	5.151
2.79	3.85	4.874		2.79	4.504	4.826	5.109
2.8	3.93	4.833		2.8	4.456	4.867	5.077
2.81	3.95	4.764		2.81	4.443	4.856	5.1
2.82	3.83	4.788		2.82	4.422	4.795	5.06
2.83	3.94	4.742		2.83	4.438	4.818	5.019
2.84	3.77	4.817		2.84	4.448	4.724	5.066
2.85	3.79	4.804		2.85	4.416	4.68	5.089
2.86	3.95	4.858		2.86	4.48	4.831	5.131
2.87	3.76	4.817		2.87	4.436	4.78	5.053
2.88	3.87	4.787		2.88	4.405	4.591	5.088
2.89	3.85	4.848		2.89	4.376	4.556	5.048
2.9	3.81	4.733		2.9	4.465	4.752	5.086
2.91	3.78	4.814		2.91	4.446	4.808	5.079
2.92	3.89	4.864		2.92	4.49	4.761	5.059
2.93	3.86	4.825		2.93	4.453	4.794	5.174
2.94	3.88	4.962		2.94	4.554	4.845	5.149
2.95	3.78	4.798		2.95	4.468	4.875	5.139
2.96	3.81	4.823		2.96	4.485	4.784	5.13
2.97	3.86	4.833		2.97	4.482	4.83	5.113
2.98	3.81	4.83		2.98	4.431	4.753	5.17
2.99	3.84	4.823		2.99	4.462	4.787	5.16
3	3.89	4.845		3	4.492	4.78	5.177
3.01	3.82	4.81		3.01	4.552	4.816	5.168
3.02	3.87	4.858		3.02	4.482	4.806	5.178
3.03	3.82	4.835		3.03	4.561	4.77	5.253
3.04	3.83	4.802		3.04	4.469	4.747	5.129
3.05	3.93	4.884		3.05	4.574	4.853	5.172
3.06	3.76	4.783		3.06	4.462	4.589	5.031
3.07	3.83	4.822		3.07	4.486	4.639	5.109
3.08	3.79	4.782		3.08	4.438	4.602	5.11
3.09	3.77	4.817		3.09	4.419	4.684	5.077
3.1	3.72	4.775		3.1	4.46	4.775	5.116
3.11	3.86	4.878		3.11	4.514	4.779	5.132
3.12	3.89	4.807		3.12	4.504	4.743	5.092
3.13	3.86	4.839		3.13	4.482	4.727	5.063
3.14	3.8	4.773		3.14	4.471	4.737	5.167
3.15	3.8	4.787		3.15	4.384	4.732	5.056
3.16	3.83	4.779		3.16	4.416	4.815	5.129
3.17	3.78	4.78		3.17	4.465	4.874	5.126
3.18	3.9	4.721		3.18	4.347	4.67	5.068
3.19	3.77	4.788		3.19	4.478	4.797	5.116
3.2	3.89	4.841		3.2	4.476	4.798	5.186
3.21	3.87	4.757		3.21	4.457	4.583	5.033
3.22	3.75	4.811		3.22	4.439	4.656	5.112
3.23	3.84	4.781		3.23	4.465	4.63	5.091
3.24	3.76	4.81		3.24	4.443	4.549	5.105
3.25	3.84	4.75		3.25	4.471	4.603	5.101
3.26	3.82	4.812		3.26	4.448	4.65	5.097
3.27	3.84	4.823		3.27	4.362	4.604	5.111
3.28	3.92	4.87		3.28	4.467	4.601	5.067
3.29	3.82	4.875		3.29	4.463	4.69	5.188
3.3	3.89	4.844		3.3	4.517	4.71	5.105
3.31	3.87	4.835		3.31	4.454	4.594	5.078
3.32	3.87	4.843		3.32	4.436	4.683	5.108
3.33	3.86	4.841		3.33	4.494	4.579	5.152
3.34	3.85	4.85		3.34	4.429	4.63	5.115
3.35	3.75	4.801		3.35	4.469	4.629	5.094
3.36	3.77	4.828		3.36	4.425	4.748	5.057
3.37	3.85	4.872		3.37	4.416	4.588	5.035
3.38	3.91	4.842		3.38	4.42	4.676	5.074
3.39	3.8	4.848		3.39	4.371	4.634	5.067
3.4	3.87	4.857		3.4	4.47	4.783	5.122
3.41	3.93	4.852		3.41	4.523	4.656	5.179
3.42	3.82	4.791		3.42	4.495	4.629	5.159
3.43	3.9	4.804		3.43	4.441	4.639	5.093
3.44	3.83	4.892		3.44	4.474	4.674	5.188
3.45	3.91	4.825		3.45	4.381	4.556	4.994
3.46	3.82	4.852		3.46	4.416	4.609	5.041
3.47	3.86	4.819		3.47	4.475	4.608	5.04
3.48	3.83	4.828		3.48	4.55	4.699	5.116
3.49	3.75	4.783		3.49	4.442	4.638	4.995
3.5	3.91	4.852		3.5	4.522	4.721	5.217
3.51	3.85	4.876		3.51	4.473	4.837	5.2
3.52	3.85	4.842		3.52	4.451	4.755	5.144
3.53	3.87	4.873		3.53	4.443	4.763	5.071
3.54	3.93	4.885		3.54	4.513	4.809	5.158
3.55	3.85	4.811		3.55	4.486	4.849	5.125
3.56	3.93	4.817		3.56	4.454	4.746	5.065
3.57	3.84	4.84		3.57	4.442	4.703	4.961
3.58	3.95	4.761		3.58	4.49	4.796	5.095
3.59	3.93	4.822		3.59	4.457	4.772	5.09
3.6	3.88	4.782		3.6	4.378	4.701	5.058
3.61	3.83	4.839		3.61	4.392	4.676	5.083
3.62	3.9	4.845		3.62	4.454	4.587	5.083
3.63	3.86	4.798		3.63	4.391	4.62	5.098
3.64	3.85	4.834		3.64	4.405	4.567	5.039
3.65	3.81	4.794		3.65	4.489	4.647	5.108
3.66	3.94	4.862		3.66	4.491	4.698	5.209
3.67	3.86	4.887		3.67	4.465	4.828	5.151
3.68	3.9	4.852		3.68	4.53	4.868	5.165
3.69	3.9	4.882		3.69	4.557	4.876	5.084
3.7	3.98	4.909		3.7	4.532	4.829	5.181
3.71	3.84	4.833		3.71	4.447	4.855	5.102
3.72	3.83	4.823		3.72	4.517	4.776	5.129
3.73	3.84	4.87		3.73	4.505	4.567	5.012
3.74	3.83	4.774		3.74	4.515	4.703	5.064
3.75	3.85	4.901		3.75	4.464	4.646	5.071
3.76	3.82	4.87		3.76	4.525	4.822	5.113
3.77	3.83	4.817		3.77	4.517	4.734	5.035
3.78	3.81	4.845		3.78	4.479	4.655	5.022
3.79	3.73	4.834		3.79	4.574	4.637	5.124
3.8	3.85	4.811		3.8	4.499	4.646	5.043
3.81	3.86	4.826		3.81	4.561	4.523	5.14
3.82	3.83	4.868		3.82	4.508	4.735	5.048
3.83	3.82	4.772		3.83	4.483	4.738	5.126
3.84	3.83	4.963		3.84	4.583	4.72	5.11
3.85	3.81	4.802		3.85	4.606	4.605	5.173
3.86	3.88	4.882		3.86	4.548	4.733	5.182
3.87	3.79	4.927		3.87	4.526	4.718	5.165
3.88	3.78	4.858		3.88	4.538	4.776	5.173
3.89	3.89	4.888		3.89	4.551	4.704	5.128
3.9	3.92	4.849		3.9	4.485	4.662	5.041
3.91	3.9	4.801		3.91	4.437	4.665	5.033
3.92	3.86	4.874		3.92	4.445	4.658	5.11
3.93	3.83	4.833		3.93	4.484	4.561	5.215
3.94	3.82	4.842		3.94	4.427	4.616	5.099
3.95	3.94	4.862		3.95	4.521	4.723	5.127
3.96	3.82	4.795		3.96	4.462	4.652	5.094
3.97	3.85	4.817		3.97	4.481	4.581	5.153
3.98	3.87	4.742		3.98	4.472	4.779	5.082
3.99	3.88	4.787		3.99	4.479	4.812	5.05
4	3.86	4.85		4	4.554	4.811	5.124
4.01	3.79	4.795		4.01	4.54	4.898	5.266
4.02	3.76	4.788		4.02	4.442	4.731	5.038
4.03	3.8	4.798		4.03	4.458	4.809	5.192
4.04	3.92	4.79		4.04	4.466	4.751	5.2
4.05	3.82	4.801		4.05	4.506	4.747	5.194
4.06	3.87	4.879		4.06	4.511	4.85	5.318
4.07	3.74	4.837		4.07	4.531	4.753	5.115
4.08	3.8	4.865		4.08	4.512	4.701	5.204
4.09	3.87	4.846		4.09	4.508	4.839	5.251
4.1	3.86	4.855		4.1	4.502	4.86	5.2
4.11	3.92	4.907		4.11	4.579	4.739	5.228
4.12	3.94	4.858		4.12	4.45	4.815	5.115
4.13	3.81	4.801		4.13	4.516	4.847	5.256
4.14	3.96	4.932		4.14	4.546	4.808	5.313
4.15	3.85	4.824		4.15	4.528	4.64	5.276
4.16	3.92	4.862		4.16	4.559	4.668	5.196
4.17	3.86	4.888		4.17	4.501	4.686	5.202
4.18	3.79	4.843		4.18	4.513	4.431	5.151
4.19	3.84	4.918		4.19	4.586	4.475	5.137
4.2	3.9	4.859		4.2	4.567	4.454	5.116
4.21	3.85	4.882		4.21	4.631	4.518	5.147
4.22	3.82	4.912		4.22	4.572	4.461	5.123
4.23	3.83	4.924		4.23	4.59	4.573	5.154
4.24	3.87	4.865		4.24	4.518	4.668	5.065
4.25	3.86	4.91		4.25	4.524	4.694	5.092
4.26	3.76	4.802		4.26	4.552	4.76	5.143
4.27	3.73	4.79		4.27	4.536	4.722	5.029
4.28	3.85	4.851		4.28	4.557	4.827	5.146
4.29	3.88	4.891		4.29	4.486	4.713	5.098
4.3	3.85	4.903		4.3	4.55	4.805	5.113
4.31	3.88	4.866		4.31	4.607	4.692	5.105
4.32	3.92	4.807		4.32	4.56	4.725	5.082
4.33	3.87	4.865		4.33	4.586	4.739	5.104
4.34	3.86	4.83		4.34	4.523	4.678	5.09
4.35	3.92	4.818		4.35	4.49	4.624	5.162
4.36	3.76	4.862		4.36	4.492	4.751	5.076
4.37	3.79	4.779		4.37	4.414	4.773	5.055
4.38	3.84	4.807		4.38	4.48	4.826	5.123
4.39	3.89	4.904		4.39	4.547	4.894	5.193
4.4	3.74	4.858		4.4	4.495	4.879	5.18
4.41	3.97	4.847		4.41	4.539	4.968	5.166
4.42	3.84	4.836		4.42	4.509	4.936	5.165
4.43	3.84	4.83		4.43	4.47	4.895	5.215
4.44	3.85	4.806		4.44	4.481	4.755	5.216
4.45	3.79	4.83		4.45	4.535	4.822	5.251
4.46	3.87	4.884		4.46	4.516	4.746	5.122
4.47	3.84	4.81		4.47	4.521	4.749	5.189
4.48	3.77	4.897		4.48	4.579	4.797	5.218
4.49	3.88	4.851		4.49	4.563	4.733	5.299
4.5	3.96	4.885		4.5	4.523	4.835	5.197
4.51	3.86	4.821		4.51	4.51	4.782	5.217
4.52	3.92	4.834		4.52	4.54	4.804	5.264
4.53	3.87	4.894		4.53	4.525	4.783	5.278
4.54	3.83	4.81		4.54	4.573	4.762	5.304
4.55	3.78	4.86		4.55	4.529	4.711	5.12
4.56	3.92	4.857		4.56	4.525	4.743	5.26
4.57	3.85	4.967		4.57	4.608	4.716	5.329
4.58	3.88	4.901		4.58	4.543	4.717	5.182
4.59	3.77	4.868		4.59	4.58	4.773	5.182
4.6	3.74	4.725		4.6	4.479	4.659	5.192
4.61	3.78	4.824		4.61	4.496	4.793	5.19
4.62	3.77	4.889		4.62	4.492	4.703	5.156
4.63	3.8	4.891		4.63	4.477	4.718	5.13
4.64	3.92	4.874		4.64	4.585	4.887	5.274
4.65	3.9	4.857		4.65	4.619	4.797	5.221
4.66	3.89	4.884		4.66	4.503	4.844	5.25
4.67	3.91	4.799		4.67	4.507	4.736	5.154
4.68	3.92	4.85		4.68	4.496	4.683	5.186
4.69	3.82	4.757		4.69	4.502	4.689	5.144
4.7	3.86	4.908		4.7	4.622	4.807	5.202
4.71	3.83	4.826		4.71	4.486	4.66	5.272
4.72	3.89	4.82		4.72	4.451	4.739	5.158
4.73	3.88	4.718		4.73	4.483	4.603	5.11
4.74	3.86	4.841		4.74	4.578	4.695	5.082
4.75	3.69	4.794		4.75	4.493	4.549	5.023
4.76	3.88	4.782		4.76	4.492	4.674	5.016
4.77	3.8	4.781		4.77	4.49	4.599	5.078
4.78	3.85	4.854		4.78	4.523	4.532	5.006
4.79	3.82	4.833		4.79	4.5	4.68	5.071
4.8	3.82	4.798		4.8	4.449	4.646	5.088
4.81	3.9	4.777		4.81	4.519	4.548	5.093
4.82	3.82	4.76		4.82	4.494	4.659	5.17
4.83	3.88	4.823		4.83	4.485	4.603	5.115
4.84	3.87	4.85		4.84	4.535	4.65	5.207
4.85	3.85	4.789		4.85	4.559	4.956	5.225
4.86	3.8	4.776		4.86	4.406	4.75	5.074
4.87	3.83	4.85		4.87	4.607	4.768	5.201
4.88	3.87	4.815		4.88	4.468	4.76	5.118
4.89	3.85	4.812		4.89	4.593	4.953	5.211
4.9	3.82	4.801		4.9	4.502	4.871	5.1
4.91	3.89	4.782		4.91	4.459	4.893	5.134
4.92	3.81	4.779		4.92	4.515	4.924	5.204
4.93	3.85	4.92		4.93	4.51	4.808	5.165
4.94	3.94	4.871		4.94	4.596	4.842	5.157
4.95	3.78	4.858		4.95	4.527	4.85	5.115
4.96	3.86	4.814		4.96	4.53	4.888	5.156
4.97	3.86	4.821		4.97	4.508	4.873	5.085
4.98	3.83	4.785		4.98	4.467	4.732	5.1
4.99	3.77	4.792		4.99	4.519	4.692	5.069
5	3.81	4.764		5	4.478	4.731	5.076
5.01	3.91	4.733		5.01	4.369	4.793	4.975
5.02	3.92	4.825		5.02	4.538	4.82	5.147
5.03	3.9	4.853		5.03	4.559	4.878	5.093
5.04	3.8	4.786		5.04	4.498	4.698	5.164
5.05	3.8	4.903		5.05	4.501	4.699	5.209
5.06	3.88	4.904		5.06	4.526	4.703	5.147
5.07	3.85	4.816		5.07	4.416	4.684	5.1
5.08	3.83	4.773		5.08	4.483	4.722	5.162
5.09	3.84	4.84		5.09	4.525	4.721	5.234
5.1	3.97	4.827		5.1	4.465	4.717	5.075
5.11	3.76	4.769		5.11	4.417	4.883	5.074
5.12	3.81	4.827		5.12	4.459	4.864	5.106
5.13	3.86	4.906		5.13	4.59	4.952	5.144
5.14	3.95	4.815		5.14	4.53	4.723	5.121
5.15	3.9	4.811		5.15	4.441	4.745	5.003
5.16	3.75	4.764		5.16	4.394	4.689	5.08
5.17	3.81	4.85		5.17	4.438	4.839	5.197
5.18	3.84	4.805		5.18	4.391	4.72	4.987
5.19	3.82	4.726		5.19	4.496	4.824	5.326
5.2	3.86	4.852		5.2	4.443	4.869	5.218
5.21	3.85	4.858		5.21	4.534	4.838	5.043
5.22	3.92	4.774		5.22	4.565	4.888	5.167
5.23	3.84	4.884		5.23	4.6	4.896	5.141
5.24	3.78	4.791		5.24	4.558	4.878	5.081
5.25	3.84	4.881		5.25	4.571	4.948	5.189
5.26	3.86	4.846		5.26	4.521	4.862	5.144
5.27	3.81	4.837		5.27	4.489	4.838	5.159
5.28	3.75	4.783		5.28	4.528	4.779	5.21
5.29	3.87	4.835		5.29	4.545	4.72	5.207
5.3	3.82	4.804		5.3	4.452	4.622	5.184
5.31	3.85	4.812		5.31	4.487	4.805	5.2
5.32	3.98	4.931		5.32	4.587	4.92	5.163
5.33	3.89	4.777		5.33	4.522	4.827	5.17
5.34	3.88	4.814		5.34	4.529	4.87	5.185
5.35	3.77	4.839		5.35	4.576	4.821	5.19
5.36	3.88	4.838		5.36	4.522	4.873	5.186
5.37	3.88	4.84		5.37	4.543	4.675	5.421
5.38	3.84	4.891		5.38	4.529	4.781	5.077
5.39	3.79	4.893		5.39	4.538	4.682	5.119
5.4	3.94	4.84		5.4	4.613	4.704	5.141
5.41	3.92	4.826		5.41	4.545	4.877	5.124
5.42	3.88	4.847		5.42	4.558	4.836	5.037
5.43	3.84	4.882		5.43	4.496	4.865	5.097
5.44	3.91	4.921		5.44	4.66	4.982	5.262
5.45	3.85	4.848		5.45	4.568	4.839	5.175
5.46	3.72	4.871		5.46	4.48	4.82	5.199
5.47	3.84	4.881		5.47	4.578	4.8	5.237
5.48	3.83	4.87		5.48	4.59	4.79	5.173
5.49	3.96	4.882		5.49	4.582	4.799	5.213
5.5	3.86	4.798		5.5	4.452	4.764	5.072
5.51	3.87	4.906		5.51	4.526	4.865	5.122
5.52	3.79	4.838		5.52	4.515	4.884	5.147
5.53	3.78	4.859		5.53	4.529	4.647	5.063
5.54	3.84	4.834		5.54	4.536	4.611	5.138
5.55	3.91	4.857		5.55	4.62	4.804	5.245
5.56	3.85	4.822		5.56	4.491	4.597	5.161
5.57	3.87	4.93		5.57	4.463	4.627	5.093
5.58	3.91	4.907		5.58	4.551	4.654	5.225
5.59	3.8	4.872		5.59	4.478	4.755	5.115
5.6	3.81	4.825		5.6	4.535	4.913	5.107
5.61	3.82	4.815		5.61	4.497	4.882	5.146
5.62	3.91	4.786		5.62	4.468	4.759	5.055
5.63	3.98	4.833		5.63	4.51	4.942	5.159
5.64	3.86	4.851		5.64	4.515	4.902	5.127
5.65	3.9	4.86		5.65	4.518	4.69	5.176
5.66	3.81	4.846		5.66	4.471	4.706	5.165
5.67	3.77	4.836		5.67	4.523	4.783	5.196
5.68	3.88	4.883		5.68	4.482	4.711	5.147
5.69	3.93	4.794		5.69	4.438	4.727	5.197
5.7	3.89	4.816		5.7	4.478	4.752	5.155
5.71	3.87	4.83		5.71	4.522	4.74	5.165
5.72	3.82	4.841		5.72	4.483	4.78	5.162
5.73	3.97	4.782		5.73	4.458	4.773	5.174
5.74	3.9	4.814		5.74	4.493	4.684	5.13
5.75	3.82	4.811		5.75	4.478	4.754	5.146
5.76	3.83	4.877		5.76	4.44	4.731	5.17
5.77	3.8	4.783		5.77	4.456	4.772	5.129
5.78	3.77	4.763		5.78	4.435	4.86	5.161
5.79	3.85	4.772		5.79	4.428	4.845	5.172
5.8	3.84	4.772		5.8	4.457	4.846	5.188
5.81	3.85	4.832		5.81	4.462	4.884	5.21
5.82	3.86	4.868		5.82	4.425	4.736	5.229
5.83	3.91	4.797		5.83	4.424	4.819	5.177
5.84	3.91	4.836		5.84	4.47	4.855	5.208
5.85	3.76	4.815		5.85	4.417	4.685	5.145
5.86	3.84	4.796		5.86	4.456	4.777	5.242
5.87	3.82	4.875		5.87	4.494	4.739	5.184
5.88	3.88	4.922		5.88	4.561	4.869	5.28
5.89	3.82	4.798		5.89	4.5	4.774	5.247
5.9	3.71	4.852		5.9	4.471	4.79	5.173
5.91	3.89	4.817		5.91	4.459	4.819	5.254
5.92	3.72	4.864		5.92	4.577	4.722	5.242
5.93	3.82	4.909		5.93	4.45	4.712	5.21
5.94	3.8	4.825		5.94	4.453	4.705	5.143
5.95	3.92	4.906		5.95	4.497	4.784	5.212
5.96	3.86	4.81		5.96	4.503	4.817	5.283
5.97	3.83	4.82		5.97	4.513	4.721	5.21
5.98	3.91	4.837		5.98	4.431	4.723	5.234
5.99	3.89	4.819		5.99	4.498	4.704	5.229
6	3.9	4.827		6	4.5	4.793	5.144
6.01	3.85	4.862		6.01	4.413	4.697	5.151
6.02	3.76	4.77		6.02	4.525	4.768	5.225
6.03	3.92	4.912		6.03	4.468	4.789	5.191
6.04	3.78	4.822		6.04	4.494	4.792	5.199
6.05	3.91	4.893		6.05	4.475	4.733	5.245
6.06	3.81	4.877		6.06	4.537	4.753	5.18
6.07	3.91	4.878		6.07	4.499	4.751	5.124
6.08	3.81	4.819		6.08	4.537	4.757	5.181
6.09	3.89	4.833		6.09	4.477	4.745	5.209
6.1	3.83	4.785		6.1	4.455	4.79	5.272
6.11	3.93	4.876		6.11	4.451	4.835	5.217
6.12	3.89	4.795		6.12	4.51	4.765	5.189
6.13	3.79	4.75		6.13	4.448	4.692	5.157
6.14	3.9	4.799		6.14	4.487	4.734	5.144
6.15	3.79	4.823		6.15	4.498	4.83	5.167
6.16	3.86	4.846		6.16	4.499	4.749	5.153
6.17	3.82	4.857		6.17	4.548	4.775	5.172
6.18	3.94	4.83		6.18	4.558	4.776	5.149
6.19	3.83	4.851		6.19	4.513	4.722	5.144
6.2	3.9	4.805		6.2	4.541	4.677	5.165
6.21	3.84	4.844		6.21	4.505	4.632	5.16
6.22	3.89	4.82		6.22	4.639	4.748	5.196
6.23	3.88	4.767		6.23	4.536	4.778	5.181
6.24	3.9	4.821		6.24	4.515	4.8	5.165
6.25	3.83	4.895		6.25	4.637	4.846	5.247
6.26	3.85	4.906		6.26	4.564	4.791	5.185
6.27	3.89	4.874		6.27	4.548	4.77	5.147
6.28	3.8	4.861		6.28	4.479	4.771	5.189
6.29	3.84	4.849		6.29	4.462	4.782	5.1
6.3	3.77	4.812		6.3	4.442	4.753	5.133
6.31	3.88	4.83		6.31	4.469	4.793	5.111
6.32	3.78	4.84		6.32	4.47	4.737	5.068
6.33	3.94	4.847		6.33	4.555	4.787	5.205
6.34	3.93	4.816		6.34	4.518	4.748	5.15
6.35	3.92	4.868		6.35	4.55	4.828	5.198
6.36	3.79	4.792		6.36	4.535	4.609	5.077
6.37	3.85	4.82		6.37	4.467	4.63	5.012
6.38	3.83	4.83		6.38	4.528	4.894	5.096
6.39	3.84	4.909		6.39	4.559	4.711	5.072
6.4	3.8	4.872		6.4	4.463	4.727	5.15
6.41	3.84	4.87		6.41	4.511	4.754	5.186
6.42	3.92	4.849		6.42	4.523	4.693	5.142
6.43	3.85	4.831		6.43	4.486	4.817	5.193
6.44	3.91	4.857		6.44	4.579	4.759	5.166
6.45	3.9	4.789		6.45	4.443	4.681	5.171
6.46	3.85	4.912		6.46	4.529	4.779	5.235
6.47	3.76	4.871		6.47	4.466	4.727	5.15
6.48	3.72	4.844		6.48	4.418	4.718	5.16
6.49	3.83	4.792		6.49	4.452	4.669	5.099
6.5	3.85	4.869		6.5	4.423	4.742	5.168
6.51	3.89	4.871		6.51	4.487	4.619	5.12
6.52	3.89	4.81		6.52	4.393	4.64	5.107
6.53	3.86	4.841		6.53	4.452	4.683	5.129
6.54	3.78	4.815		6.54	4.496	4.829	5.188
6.55	3.89	4.999		6.55	4.446	4.543	5.232
6.56	3.76	4.826		6.56	4.381	4.55	5.111
6.57	3.84	4.834		6.57	4.444	4.864	5.146
6.58	3.95	4.881		6.58	4.506	4.951	5.244
6.59	3.8	4.806		6.59	4.467	4.89	5.196
6.6	3.88	4.823		6.6	4.467	4.695	5.178
6.61	3.97	4.908		6.61	4.489	4.732	5.159
6.62	3.93	4.923		6.62	4.469	4.642	5.104
6.63	3.81	4.872		6.63	4.47	4.676	5.153
6.64	3.89	4.882		6.64	4.535	4.73	5.145
6.65	3.81	4.836		6.65	4.516	4.736	5.214
6.66	3.93	4.844		6.66	4.501	4.756	5.187
6.67	3.84	4.799		6.67	4.545	4.711	5.1
6.68	4.01	4.894		6.68	4.487	4.677	5.15
6.69	3.84	4.746		6.69	4.515	4.664	5.195
6.7	3.85	4.852		6.7	4.576	4.763	5.152
6.71	3.8	4.924		6.71	4.489	4.695	5.149
6.72	3.9	4.923		6.72	4.567	4.787	5.167
6.73	3.83	4.838		6.73	4.569	4.668	5.145
6.74	3.91	4.884		6.74	4.444	4.538	5.088
6.75	3.92	4.862		6.75	4.551	4.697	5.143
6.76	3.87	4.908		6.76	4.586	4.768	5.176
6.77	3.72	4.839		6.77	4.47	4.794	5.09
6.78	3.85	4.832		6.78	4.531	4.762	5.178
6.79	3.88	4.887		6.79	4.527	4.82	5.171
6.8	3.85	4.915		6.8	4.523	4.741	5.206
6.81	3.93	4.96		6.81	4.574	4.772	5.198
6.82	3.87	4.93		6.82	4.614	4.952	5.243
6.83	3.81	4.809		6.83	4.432	4.721	5.198
6.84	3.81	4.779		6.84	4.476	4.763	5.114
6.85	3.86	4.871		6.85	4.48	4.741	5.16
6.86	3.85	4.826		6.86	4.523	4.798	5.18
6.87	3.94	4.882		6.87	4.566	4.796	5.192
6.88	3.86	4.761		6.88	4.448	4.768	5.111
6.89	3.84	4.905		6.89	4.564	4.932	5.153
6.9	3.9	4.855		6.9	4.57	4.887	5.183
6.91	3.85	4.805		6.91	4.604	4.997	5.18
6.92	3.82	4.885		6.92	4.568	5.012	5.208
6.93	3.89	4.798		6.93	4.535	4.886	5.174
6.94	3.75	4.832		6.94	4.558	4.959	5.079
6.95	3.94	4.866		6.95	4.521	4.934	5.109
6.96	3.88	4.912		6.96	4.633	4.976	5.107
6.97	3.83	4.935		6.97	4.588	4.933	5.134
6.98	3.85	4.862		6.98	4.607	4.94	5.118
6.99	3.72	4.864		6.99	4.551	4.862	5.054
7	3.75	4.864		7	4.584	4.732	5.044
7.01	3.86	4.881		7.01	4.516	4.778	5.061
7.02	3.79	4.886		7.02	4.495	4.629	5.037
7.03	3.84	4.841		7.03	4.541	4.654	5.029
7.04	3.75	4.837		7.04	4.507	4.724	4.996
7.05	3.85	4.924		7.05	4.534	4.856	5.118
7.06	3.8	4.823		7.06	4.529	4.994	5.144
7.07	3.9	4.878		7.07	4.572	4.977	5.109
7.08	3.93	4.896		7.08	4.612	5.004	5.114
7.09	3.8	4.935		7.09	4.547	4.96	5.102
7.1	3.91	4.841		7.1	4.557	4.919	5.087
7.11	3.8	4.855		7.11	4.492	4.971	5.071
7.12	3.7	4.838		7.12	4.609	4.925	5.105
7.13	3.89	4.811		7.13	4.527	4.781	5.102
7.14	3.85	4.912		7.14	4.561	4.932	5.077
7.15	3.84	4.905		7.15	4.495	4.777	5.14
7.16	3.81	4.828		7.16	4.53	4.861	5.149
7.17	3.94	4.822		7.17	4.568	4.947	5.171
7.18	3.82	4.807		7.18	4.591	5.067	5.203
7.19	3.85	4.811		7.19	4.548	4.913	5.104
7.2	3.9	4.828		7.2	4.56	4.955	5.209
7.21	3.85	4.844		7.21	4.524	4.954	5.205
7.22	3.92	4.925		7.22	4.607	4.961	5.227
7.23	3.88	4.772		7.23	4.567	4.898	5.114
7.24	3.9	4.908		7.24	4.634	4.899	5.187
7.25	3.97	4.915		7.25	4.618	4.979	5.172
7.26	3.9	4.917		7.26	4.568	4.916	5.116
7.27	3.98	4.855		7.27	4.53	4.978	5.142
7.28	3.84	4.975		7.28	4.63	4.961	5.164
7.29	3.83	4.932		7.29	4.607	4.803	5.105
7.3	3.9	4.905		7.3	4.632	4.936	5.155
7.31	3.84	4.875		7.31	4.516	4.857	5.134
7.32	3.92	4.861		7.32	4.51	4.902	5.075
7.33	3.81	4.849		7.33	4.537	4.725	5.108
7.34	3.85	4.844		7.34	4.547	4.924	5.126
7.35	3.85	4.835		7.35	4.48	4.903	5.101
7.36	3.85	4.827		7.36	4.519	4.884	5.05
7.37	3.88	4.791		7.37	4.443	4.867	5.033
7.38	3.91	4.883		7.38	4.506	4.839	5.12
7.39	3.77	4.798		7.39	4.48	4.796	5.114
7.4	3.96	4.894		7.4	4.541	4.815	5.07
7.41	3.8	4.825		7.41	4.449	4.85	5.071
7.42	3.89	4.822		7.42	4.557	4.828	5.125
7.43	3.77	4.863		7.43	4.441	4.734	5.059
7.44	3.86	4.904		7.44	4.582	4.905	5.179
7.45	3.67	4.848		7.45	4.455	4.781	5.141
7.46	3.93	4.792		7.46	4.509	4.957	5.084
7.47	3.84	4.825		7.47	4.446	4.772	5.165
7.48	3.8	4.884		7.48	4.526	4.879	5.153
7.49	3.92	4.849		7.49	4.546	4.938	5.24
7.5	3.74	4.883		7.5	4.541	4.807	5.162
7.51	3.9	4.825		7.51	4.523	4.833	5.045
7.52	3.8	4.788		7.52	4.627	4.844	5.185
7.53	3.84	4.847		7.53	4.543	4.925	5.184
7.54	3.82	4.814		7.54	4.495	4.72	5.042
7.55	3.8	4.809		7.55	4.54	4.729	5.085
7.56	3.93	4.896		7.56	4.55	4.708	5.036
7.57	3.75	4.772		7.57	4.438	4.833	5.04
7.58	3.81	4.81		7.58	4.5	4.66	5.106
7.59	3.89	4.847		7.59	4.517	4.64	5.111
7.6	3.9	4.878		7.6	4.534	4.756	5.086
7.61	3.77	4.876		7.61	4.529	4.803	5.152
7.62	3.99	4.925		7.62	4.437	4.752	5.063
7.63	3.77	4.769		7.63	4.427	4.652	5.146
7.64	3.85	4.821		7.64	4.513	4.712	4.994
7.65	3.82	4.902		7.65	4.477	4.653	5.019
7.66	3.91	4.809		7.66	4.573	4.719	5.139
7.67	3.73	4.808		7.67	4.514	4.741	5.056
7.68	3.91	4.819		7.68	4.583	4.955	5.135
7.69	3.91	4.82		7.69	4.551	4.927	5.126
7.7	3.94	4.835		7.7	4.547	4.841	5.105
7.71	3.9	4.831		7.71	4.561	4.891	5.076
7.72	3.81	4.779		7.72	4.47	4.714	5.105
7.73	3.99	4.819		7.73	4.611	4.807	5.092
7.74	3.86	4.802		7.74	4.525	4.697	5.054
7.75	3.82	4.747		7.75	4.539	4.664	5.125
7.76	3.83	4.811		7.76	4.48	4.554	5.004
7.77	3.81	4.786		7.77	4.515	4.673	5.104
7.78	3.74	4.784		7.78	4.47	4.634	5.039
7.79	3.84	4.755		7.79	4.533	4.677	5.092
7.8	3.75	4.745		7.8	4.514	4.76	5.071
7.81	3.81	4.756		7.81	4.499	4.728	5.076
7.82	3.82	4.809		7.82	4.569	4.781	5.079
7.83	3.86	4.803		7.83	4.537	4.676	5.091
7.84	3.77	4.83		7.84	4.522	4.708	5.047
7.85	3.77	4.849		7.85	4.583	4.724	5.063
7.86	3.87	4.75		7.86	4.533	4.655	5.084
7.87	3.78	4.849		7.87	4.638	4.724	5.058
7.88	3.84	4.789		7.88	4.594	4.772	5.077
7.89	3.87	4.872		7.89	4.528	4.882	5.067
7.9	3.79	4.797		7.9	4.59	4.732	5.083
7.91	3.8	4.833		7.91	4.617	4.729	5.106
7.92	3.89	4.861		7.92	4.612	4.659	5.093
7.93	3.79	4.844		7.93	4.564	4.837	5.087
7.94	3.91	4.765		7.94	4.499	4.878	5.057
7.95	3.82	4.84		7.95	4.524	4.846	5.064
7.96	3.82	4.821		7.96	4.571	4.855	5.081
7.97	3.81	4.883		7.97	4.579	4.805	5.076
7.98	3.82	4.845		7.98	4.596	4.934	5.151
7.99	3.81	4.853		7.99	4.613	4.942	5.123
8	3.81	4.822		8	4.568	4.77	5.017
8.01	3.77	4.78		8.01	4.499	4.63	5.274
8.02	3.8	4.819		8.02	4.569	4.746	5.1
8.03	3.79	4.805		8.03	4.552	4.721	5.076
8.04	3.96	4.759		8.04	4.566	4.621	5.12
8.05	4	4.826		8.05	4.608	4.724	5.17
8.06	3.81	4.784		8.06	4.547	4.581	5.1
8.07	3.81	4.88		8.07	4.541	4.923	5.146
8.08	3.85	4.842		8.08	4.554	4.837	5.098
8.09	3.76	4.845		8.09	4.496	4.914	5.169
8.1	3.93	4.876		8.1	4.522	4.858	5.134
8.11	3.87	4.966		8.11	4.638	4.67	5.151
8.12	3.93	4.844		8.12	4.478	4.651	5.166
8.13	3.78	4.771		8.13	4.469	4.644	5.109
8.14	3.86	4.827		8.14	4.514	4.612	5.114
8.15	3.79	4.826		8.15	4.544	4.784	5.141
8.16	3.74	4.879		8.16	4.56	4.727	5.091
8.17	3.8	4.873		8.17	4.619	4.833	5.175
8.18	3.86	4.823		8.18	4.646	4.747	5.088
8.19	3.88	4.868		8.19	4.596	4.764	5.152
8.2	3.83	4.836		8.2	4.56	4.725	5.144
8.21	3.91	4.874		8.21	4.639	4.663	5.12
8.22	3.89	4.772		8.22	4.536	4.81	5.138
8.23	3.77	4.846		8.23	4.551	4.721	5.066
8.24	3.78	4.805		8.24	4.54	4.766	5.099
8.25	3.92	4.811		8.25	4.538	4.76	5.045
8.26	3.76	4.805		8.26	4.505	4.732	5.017
8.27	3.85	4.84		8.27	4.597	4.725	5.079
8.28	3.67	4.719		8.28	4.524	4.707	5.049
8.29	3.97	4.816		8.29	4.54	4.787	5.114
8.3	3.77	4.809		8.3	4.568	4.877	5.082
8.31	3.83	4.769		8.31	4.552	4.901	5.094
8.32	3.89	4.775		8.32	4.582	4.797	5.08
8.33	3.89	4.812		8.33	4.607	4.808	5.136
8.34	3.91	4.945		8.34	4.569	4.675	5.095
8.35	3.88	4.792		8.35	4.573	4.63	5.144
8.36	3.85	4.81		8.36	4.602	4.552	5.099
8.37	3.78	4.798		8.37	4.558	4.576	5.099
8.38	3.8	4.85		8.38	4.55	4.642	5.18
8.39	3.97	4.807		8.39	4.514	4.648	5.156
8.4	3.8	4.808		8.4	4.523	4.566	5.226
8.41	3.84	4.806		8.41	4.53	4.553	5.124
8.42	3.87	4.835		8.42	4.592	4.547	5.111
8.43	3.95	4.805		8.43	4.482	4.612	5.123
8.44	3.89	4.88		8.44	4.6	4.551	5.216
8.45	3.79	4.831		8.45	4.496	4.552	5.11
8.46	3.92	4.828		8.46	4.56	4.6	5.185
8.47	3.84	4.835		8.47	4.528	4.551	5.21
8.48	3.86	4.813		8.48	4.503	4.477	5.096
8.49	3.82	4.82		8.49	4.524	4.604	5.195
8.5	3.88	4.896		8.5	4.514	4.518	5.168
8.51	3.78	4.804		8.51	4.513	4.528	5.116
8.52	3.9	4.985		8.52	4.534	4.576	5.089
8.53	3.89	4.935		8.53	4.58	4.677	5.125
8.54	3.88	4.868		8.54	4.488	4.815	5.169
8.55	3.81	4.82		8.55	4.518	4.608	5.098
8.56	3.72	4.858		8.56	4.509	4.555	5.07
8.57	3.8	4.833		8.57	4.532	4.631	5.157
8.58	3.84	4.837		8.58	4.533	4.858	5.114
8.59	3.78	4.854		8.59	4.527	4.88	5.219
8.6	3.84	4.897		8.6	4.538	4.896	5.061
8.61	3.89	4.82		8.61	4.527	4.769	5.171
8.62	3.96	4.835		8.62	4.539	4.594	5.106
8.63	3.81	4.785		8.63	4.474	4.586	5.078
8.64	3.91	4.809		8.64	4.495	4.666	5.038
8.65	3.9	4.857		8.65	4.525	4.598	5.123
8.66	3.93	4.839		8.66	4.619	4.601	5.254
8.67	3.86	4.913		8.67	4.579	4.735	5.187
8.68	3.78	4.86		8.68	4.654	4.774	5.248
8.69	3.95	4.843		8.69	4.599	4.677	5.214
8.7	3.97	4.885		8.7	4.556	4.564	5.252
8.71	3.86	4.773		8.71	4.612	4.683	5.192
8.72	3.96	4.873		8.72	4.602	4.557	5.129
8.73	3.84	4.814		8.73	4.458	4.674	5.08
8.74	3.82	4.865		8.74	4.585	4.754	5.166
8.75	3.85	4.8		8.75	4.586	4.616	5.106
8.76	3.81	4.882		8.76	4.6	4.628	5.142
8.77	3.82	4.831		8.77	4.618	4.756	5.365
8.78	3.88	4.871		8.78	4.614	4.701	5.153
8.79	3.88	4.801		8.79	4.559	4.722	5.122
8.8	3.94	4.857		8.8	4.492	4.589	5.118
8.81	3.84	4.807		8.81	4.535	4.699	5.204
8.82	3.83	4.761		8.82	4.55	4.837	5.227
8.83	3.83	4.881		8.83	4.565	4.724	5.155
8.84	3.84	4.791		8.84	4.538	4.694	5.155
8.85	3.78	4.792		8.85	4.53	4.671	5.226
8.86	3.81	4.859		8.86	4.57	4.849	5.144
8.87	3.91	4.744		8.87	4.45	4.742	5.12
8.88	3.83	4.801		8.88	4.547	4.699	5.195
8.89	3.76	4.798		8.89	4.538	4.71	5.286
8.9	3.91	4.813		8.9	4.493	4.664	5.345
8.91	3.82	4.775		8.91	4.562	4.584	5.216
8.92	3.87	4.852		8.92	4.536	4.79	5.214
8.93	3.84	4.842		8.93	4.576	4.773	5.167
8.94	3.84	4.796		8.94	4.588	4.686	5.179
8.95	3.8	4.785		8.95	4.563	4.674	5.171
8.96	3.76	4.85		8.96	4.617	4.805	5.221
8.97	3.79	4.96		8.97	4.619	4.731	5.188
8.98	3.82	4.778		8.98	4.54	4.68	5.106
8.99	3.84	4.75		8.99	4.48	4.676	5.169
9	3.85	4.825		9	4.557	4.741	5.125
9.01	3.83	4.789		9.01	4.558	4.763	5.134
9.02	3.82	4.791		9.02	4.658	4.847	5.316
9.03	3.84	4.867		9.03	4.547	4.713	5.131
9.04	3.91	4.861		9.04	4.557	4.713	5.162
9.05	3.9	4.836		9.05	4.513	4.48	4.961
9.06	3.86	4.811		9.06	4.48	4.711	5.094
9.07	3.93	4.823		9.07	4.54	4.52	5.169
9.08	3.98	4.808		9.08	4.558	4.568	5.173
9.09	3.82	4.813		9.09	4.495	4.475	5.056
9.1	3.91	4.887		9.1	4.533	4.597	5.076
9.11	3.75	4.933		9.11	4.605	4.644	5.176
9.12	3.77	4.818		9.12	4.612	4.815	5.156
9.13	3.92	4.822		9.13	4.476	4.841	5.042
9.14	3.89	4.806		9.14	4.51	4.792	5.17
9.15	3.83	4.717		9.15	4.515	4.781	5.074
9.16	3.9	4.722		9.16	4.557	4.726	5.099
9.17	3.9	4.767		9.17	4.573	4.712	5.162
9.18	3.87	4.926		9.18	4.595	4.826	5.152
9.19	3.83	4.869		9.19	4.677	5.007	5.259
9.2	3.78	4.891		9.2	4.569	4.842	5.21
9.21	3.91	4.79		9.21	4.611	4.78	5.119
9.22	3.88	4.877		9.22	4.622	4.641	5.103
9.23	3.82	4.811		9.23	4.632	4.917	5.182
9.24	3.86	4.911		9.24	4.62	4.969	5.134
9.25	3.89	4.909		9.25	4.619	4.895	5.129
9.26	3.78	4.836		9.26	4.626	4.946	5.085
9.27	3.79	4.889		9.27	4.592	4.772	5.107
9.28	3.83	4.854		9.28	4.613	4.692	5.129
9.29	3.79	4.817		9.29	4.528	4.613	5.113
9.3	3.93	4.908		9.3	4.673	4.712	5.325
9.31	3.81	4.913		9.31	4.656	4.776	5.21
9.32	3.85	4.874		9.32	4.638	4.671	5.303
9.33	3.85	4.903		9.33	4.601	4.718	5.24
9.34	3.85	4.903		9.34	4.588	4.779	5.241
9.35	3.82	4.821		9.35	4.529	4.707	5.134
9.36	3.8	4.881		9.36	4.639	4.852	5.229
9.37	3.89	4.864		9.37	4.55	4.785	5.237
9.38	3.87	4.889		9.38	4.558	4.662	5.218
9.39	3.9	4.854		9.39	4.553	4.72	5.113
9.4	3.9	4.849		9.4	4.578	4.845	5.172
9.41	3.83	4.797		9.41	4.549	4.731	5.306
9.42	3.89	4.878		9.42	4.591	4.846	5.222
9.43	3.87	4.732		9.43	4.523	4.748	5.165
9.44	3.86	4.822		9.44	4.553	4.789	5.202
9.45	3.88	4.833		9.45	4.623	4.87	5.222
9.46	3.81	4.862		9.46	4.574	4.902	5.27
9.47	3.82	4.796		9.47	4.513	4.898	5.259
9.48	3.81	4.812		9.48	4.527	4.752	5.179
9.49	3.85	4.857		9.49	4.511	4.715	5.2
9.5	3.89	4.768		9.5	4.539	4.989	5.245
9.51	3.92	4.835		9.51	4.572	4.861	5.209
9.52	3.71	4.841		9.52	4.559	4.867	5.227
9.53	3.82	4.879		9.53	4.596	4.81	5.295
9.54	3.78	4.856		9.54	4.542	4.894	5.269
9.55	3.78	4.836		9.55	4.617	4.851	5.277
9.56	3.93	4.831		9.56	4.586	4.781	5.29
9.57	3.81	4.873		9.57	4.613	4.711	5.327
9.58	3.9	4.814		9.58	4.57	4.711	5.345
9.59	3.94	4.809		9.59	4.581	4.831	5.267
9.6	3.81	4.796		9.6	4.624	4.755	5.319
9.61	3.86	4.787		9.61	4.564	4.713	5.265
9.62	3.93	4.874		9.62	4.575	4.825	5.429
9.63	3.93	4.836		9.63	4.428	4.686	5.165
9.64	3.92	4.779		9.64	4.513	4.746	5.267
9.65	3.86	4.834		9.65	4.477	4.752	5.236
9.66	3.86	4.787		9.66	4.431	4.677	5.175
9.67	3.88	4.849		9.67	4.577	4.711	5.237
9.68	3.83	4.8		9.68	4.513	4.712	5.224
9.69	3.96	4.808		9.69	4.439	4.535	5.151
9.7	3.84	4.81		9.7	4.552	4.661	5.159
9.71	3.81	4.834		9.71	4.51	4.62	5.152
9.72	3.82	4.766		9.72	4.366	4.726	5.195
9.73	3.87	4.726		9.73	4.478	4.72	5.193
9.74	3.84	4.854		9.74	4.472	4.79	5.213
9.75	3.83	4.789		9.75	4.401	4.616	5.195
9.76	3.87	4.797		9.76	4.401	4.733	5.197
9.77	3.82	4.751		9.77	4.463	4.722	5.103
9.78	3.86	4.736		9.78	4.425	4.691	5.136
9.79	3.86	4.784		9.79	4.451	4.667	5.12
9.8	3.84	4.783		9.8	4.474	4.699	5.233
9.81	3.88	4.773		9.81	4.412	4.681	5.222
9.82	3.79	4.783		9.82	4.431	4.707	5.246
9.83	3.8	4.832		9.83	4.493	4.644	5.23
9.84	3.88	4.793		9.84	4.533	4.716	5.217
9.85	3.77	4.792		9.85	4.499	4.84	5.332
9.86	3.9	4.81		9.86	4.44	4.716	5.257
9.87	3.81	4.773		9.87	4.461	4.741	5.386
9.88	3.85	4.802		9.88	4.465	4.765	5.223
9.89	3.82	4.84		9.89	4.518	4.769	5.31
9.9	3.88	4.817		9.9	4.463	4.736	5.225
9.91	3.88	4.811		9.91	4.536	4.816	5.334
9.92	3.83	4.757		9.92	4.441	4.714	5.287
9.93	3.85	4.84		9.93	4.495	4.832	5.252
9.94	3.81	4.839		9.94	4.554	4.698	5.206
9.95	3.83	4.813		9.95	4.483	4.716	5.286
9.96	3.9	4.885		9.96	4.472	4.714	5.289
9.97	3.82	4.829		9.97	4.501	4.757	5.214
9.98	3.75	4.855		9.98	4.522	4.846	5.357
9.99	3.86	4.809		9.99	4.568	4.815	5.437
10	3.75	4.801		10	4.505	4.763	5.305
10.01	3.79	4.846		10.01	4.519	4.661	5.336
10.02	3.81	4.726		10.02	4.464	4.656	5.276
10.03	3.78	4.899		10.03	4.593	4.781	5.26
10.04	3.87	4.794		10.04	4.595	4.816	5.322
10.05	3.92	4.913		10.05	4.564	5.083	5.409
10.06	3.79	4.817		10.06	4.549	5	5.363
10.07	3.9	4.83		10.07	4.438	4.951	5.235
10.08	3.79	4.739		10.08	4.457	4.937	5.248
10.09	3.88	4.814		10.09	4.504	5.028	5.348
10.1	3.81	4.89		10.1	4.602	5.11	5.449
10.11	3.83	4.815		10.11	4.553	4.929	5.294
10.12	3.86	4.867		10.12	4.596	5.017	5.274
10.13	3.9	4.879		10.13	4.541	4.913	5.212
10.14	3.86	4.896		10.14	4.535	4.96	5.401
10.15	3.83	4.796		10.15	4.507	5.059	5.222
10.16	3.91	4.874		10.16	4.507	5.029	5.416
10.17	3.95	4.805		10.17	4.556	4.983	5.411
10.18	3.85	4.826		10.18	4.533	4.963	5.444
10.19	3.78	4.83		10.19	4.449	4.926	5.287
10.2	3.86	4.735		10.2	4.49	4.755	5.23
10.21	3.83	4.802		10.21	4.532	4.795	5.241
10.22	3.92	4.72		10.22	4.457	4.749	5.246
10.23	3.8	4.856		10.23	4.507	4.806	5.294
10.24	3.86	4.78		10.24	4.467	4.723	5.429
10.25	3.83	4.811		10.25	4.508	4.722	5.248
10.26	3.88	4.881		10.26	4.587	4.798	5.37
10.27	3.75	4.84		10.27	4.48	4.959	5.285
10.28	3.83	4.834		10.28	4.481	4.86	5.295
10.29	3.87	4.81		10.29	4.57	4.971	5.29
10.3	3.82	4.788		10.3	4.515	4.883	5.299
10.31	3.86	4.842		10.31	4.488	4.887	5.226
10.32	3.73	4.736		10.32	4.48	4.849	5.33
10.33	3.85	4.839		10.33	4.448	4.938	5.243
10.34	3.84	4.795		10.34	4.439	4.835	5.299
10.35	3.85	4.752		10.35	4.473	4.874	5.218
10.36	3.76	4.79		10.36	4.474	4.902	5.221
10.37	3.9	4.866		10.37	4.538	4.985	5.239
10.38	3.81	4.791		10.38	4.427	4.92	5.264
10.39	3.74	4.768		10.39	4.503	4.674	5.205
10.4	3.84	4.806		10.4	4.47	4.665	5.258
10.41	3.91	4.804		10.41	4.538	4.732	5.213
10.42	3.84	4.822		10.42	4.587	4.913	5.262
10.43	3.86	4.772		10.43	4.502	4.962	5.253
10.44	3.78	4.788		10.44	4.426	4.882	5.09
10.45	3.84	4.818		10.45	4.53	4.88	5.182
10.46	4	4.865		10.46	4.51	4.909	5.233
10.47	3.81	4.772		10.47	4.487	4.959	5.203
10.48	3.79	4.855		10.48	4.439	4.865	5.172
10.49	3.81	4.847		10.49	4.418	4.801	5.25
10.5	3.84	4.791		10.5	4.448	4.806	5.223
10.51	3.78	4.811		10.51	4.494	4.849	5.277
10.52	3.89	4.776		10.52	4.44	4.849	5.136
10.53	3.89	4.829		10.53	4.515	4.89	5.259
10.54	3.88	4.856		10.54	4.501	4.958	5.197
10.55	3.69	4.856		10.55	4.505	4.908	5.242
10.56	3.9	4.926		10.56	4.552	4.962	5.255
10.57	3.83	4.838		10.57	4.493	4.87	5.191
10.58	3.89	4.829		10.58	4.523	4.953	5.251
10.59	3.82	4.851		10.59	4.614	4.827	5.226
10.6	3.94	4.863		10.6	4.612	4.719	5.274
10.61	3.85	4.923		10.61	4.663	4.871	5.31
10.62	3.85	4.874		10.62	4.485	4.709	5.197
10.63	3.84	4.885		10.63	4.606	4.801	5.305
10.64	3.81	4.805		10.64	4.541	4.925	5.265
10.65	3.9	4.918		10.65	4.583	4.78	5.288
10.66	3.87	4.807		10.66	4.616	4.877	5.28
10.67	3.82	4.766		10.67	4.461	4.619	5.154
10.68	3.96	4.82		10.68	4.455	4.786	5.153
10.69	3.93	4.814		10.69	4.52	4.768	5.251
10.7	3.91	4.809		10.7	4.538	4.95	5.195
10.71	3.81	4.853		10.71	4.496	4.979	5.208
10.72	3.79	4.811		10.72	4.479	4.849	5.19
10.73	3.86	4.771		10.73	4.489	4.938	5.206
10.74	3.89	4.782		10.74	4.426	4.886	5.199
10.75	3.95	4.762		10.75	4.468	4.854	5.137
10.76	3.88	4.731		10.76	4.497	4.888	5.168
10.77	3.85	4.792		10.77	4.429	4.861	5.172
10.78	3.86	4.756		10.78	4.488	4.733	5.145
10.79	3.82	4.755		10.79	4.425	4.731	5.168
10.8	3.82	4.811		10.8	4.487	4.808	5.275
10.81	3.81	4.821		10.81	4.512	4.775	5.233
10.82	3.84	4.75		10.82	4.496	4.857	5.244
10.83	3.84	4.795		10.83	4.454	4.923	5.227
10.84	3.94	4.857		10.84	4.561	4.969	5.233
10.85	3.84	4.796		10.85	4.418	4.668	5.204
10.86	3.86	4.78		10.86	4.534	4.769	5.204
10.87	3.82	4.794		10.87	4.46	4.838	5.177
10.88	3.8	4.839		10.88	4.563	4.775	5.237
10.89	3.86	4.781		10.89	4.548	4.672	5.219
10.9	3.83	4.778		10.9	4.568	4.702	5.178
10.91	3.84	4.848		10.91	4.575	4.805	5.257
10.92	3.88	4.852		10.92	4.609	4.966	5.333
10.93	3.84	4.844		10.93	4.598	4.97	5.295
10.94	3.84	4.877		10.94	4.632	5.04	5.357
10.95	3.87	4.846		10.95	4.54	4.972	5.267
10.96	3.87	4.871		10.96	4.623	4.988	5.335
10.97	3.9	4.805		10.97	4.534	4.86	5.259
10.98	3.81	4.83		10.98	4.567	4.907	5.323
10.99	3.82	4.77		10.99	4.58	4.895	5.36
11	3.84	4.8		11	4.537	4.934	5.295
11.01	3.89	4.789		11.01	4.536	4.976	5.276
11.02	3.87	4.796		11.02	4.595	4.966	5.343
11.03	3.88	4.888		11.03	4.623	4.842	5.185
11.04	3.91	4.845		11.04	4.559	4.961	5.244
11.05	3.79	4.809		11.05	4.484	4.879	5.194
11.06	3.83	4.875		11.06	4.529	4.781	5.15
11.07	3.89	4.851		11.07	4.552	4.895	5.216
11.08	3.92	4.794		11.08	4.462	4.863	5.235
11.09	3.81	4.886		11.09	4.578	4.904	5.254
11.1	3.87	4.829		11.1	4.597	4.892	5.206
11.11	3.78	4.819		11.11	4.47	4.82	5.206
11.12	3.89	4.924		11.12	4.538	4.897	5.25
11.13	3.93	4.829		11.13	4.494	4.931	5.249
11.14	3.9	4.818		11.14	4.557	4.853	5.242
11.15	3.86	4.843		11.15	4.533	4.865	5.234
11.16	3.81	4.835		11.16	4.561	4.754	5.189
11.17	3.85	4.915		11.17	4.604	4.815	5.359
11.18	3.89	4.838		11.18	4.556	4.717	5.346
11.19	3.82	4.813		11.19	4.501	4.805	5.225
11.2	3.83	4.786		11.2	4.499	4.663	5.205
11.21	3.79	4.833		11.21	4.464	4.717	5.202
11.22	3.8	4.775		11.22	4.484	4.679	5.163
11.23	3.88	4.754		11.23	4.465	4.645	5.219
11.24	3.88	4.818		11.24	4.504	4.695	5.228
11.25	3.86	4.841		11.25	4.543	4.803	5.258
11.26	3.91	4.805		11.26	4.616	4.815	5.251
11.27	3.81	4.85		11.27	4.566	4.74	5.182
11.28	3.99	4.791		11.28	4.576	4.705	5.207
11.29	3.84	4.873		11.29	4.614	4.821	5.277
11.3	3.73	4.835		11.3	4.499	4.715	5.19
11.31	3.84	4.847		11.31	4.558	4.755	5.205
11.32	3.79	4.822		11.32	4.591	4.728	5.233
11.33	3.75	4.764		11.33	4.516	4.79	5.205
11.34	3.92	4.845		11.34	4.523	4.82	5.251
11.35	3.85	4.93		11.35	4.559	4.796	5.249
11.36	3.94	4.841		11.36	4.464	4.741	5.202
11.37	3.83	4.804		11.37	4.465	4.873	5.242
11.38	3.87	4.787		11.38	4.419	4.829	5.21
11.39	3.92	4.826		11.39	4.461	4.914	5.295
11.4	3.75	4.855		11.4	4.593	4.874	5.233
11.41	3.88	4.81		11.41	4.484	4.837	5.18
11.42	3.86	4.853		11.42	4.578	5.051	5.306
11.43	3.89	4.767		11.43	4.461	4.973	5.218
11.44	3.9	4.747		11.44	4.414	4.81	5.179
11.45	3.9	4.79		11.45	4.43	4.733	5.225
11.46	3.88	4.817		11.46	4.522	4.771	5.216
11.47	3.87	4.784		11.47	4.495	4.742	5.255
11.48	3.85	4.758		11.48	4.502	4.815	5.224
11.49	3.91	4.789		11.49	4.58	4.859	5.267
11.5	3.9	4.785		11.5	4.455	4.747	5.208
11.51	3.89	4.762		11.51	4.451	4.6	5.217
11.52	3.9	4.844		11.52	4.502	4.788	5.281
11.53	3.86	4.767		11.53	4.432	4.665	5.157
11.54	3.78	4.827		11.54	4.512	4.759	5.237
11.55	3.88	4.849		11.55	4.528	4.743	5.248
11.56	3.94	4.812		11.56	4.568	4.817	5.263
11.57	3.9	4.775		11.57	4.503	4.703	5.253
11.58	3.9	4.893		11.58	4.546	4.783	5.286
11.59	3.83	4.766		11.59	4.528	4.795	5.294
11.6	3.89	4.781		11.6	4.482	4.698	5.159
11.61	3.83	4.913		11.61	4.543	4.821	5.278
11.62	3.84	4.793		11.62	4.487	4.776	5.265
11.63	3.9	4.816		11.63	4.446	4.733	5.212
11.64	3.95	4.85		11.64	4.547	4.825	5.35
11.65	3.87	4.884		11.65	4.513	4.958	5.277
11.66	3.93	4.817		11.66	4.476	4.725	5.181
11.67	3.86	4.848		11.67	4.585	4.838	5.268
11.68	3.78	4.92		11.68	4.542	4.796	5.28
11.69	3.98	4.829		11.69	4.508	4.784	5.236
11.7	3.9	4.903		11.7	4.547	4.876	5.303
11.71	3.96	4.868		11.71	4.573	4.787	5.339
11.72	3.92	4.889		11.72	4.511	4.903	5.297
11.73	3.91	4.841		11.73	4.545	4.883	5.282
11.74	3.89	4.826		11.74	4.594	4.853	5.294
11.75	3.78	4.82		11.75	4.528	4.781	5.27
11.76	3.9	4.792		11.76	4.538	4.786	5.216
11.77	3.87	4.817		11.77	4.584	4.85	5.289
11.78	3.87	4.85		11.78	4.598	4.857	5.214
11.79	3.82	4.745		11.79	4.581	4.816	5.249
11.8	3.88	4.816		11.8	4.545	4.793	5.215
11.81	3.94	4.751		11.81	4.484	4.868	5.331
11.82	3.82	4.861		11.82	4.564	4.766	5.255
11.83	3.86	4.861		11.83	4.549	4.72	5.242
11.84	3.79	4.848		11.84	4.519	4.805	5.241
11.85	3.86	4.872		11.85	4.561	4.826	5.246
11.86	3.84	4.827		11.86	4.611	4.856	5.265
11.87	3.81	4.815		11.87	4.637	4.823	5.28
11.88	3.86	4.826		11.88	4.573	4.913	5.351
11.89	3.83	4.774		11.89	4.492	4.651	5.145
11.9	3.83	4.882		11.9	4.633	4.862	5.241
11.91	3.82	4.819		11.91	4.534	4.992	5.261
11.92	3.84	4.827		11.92	4.527	4.85	5.161
11.93	3.84	4.876		11.93	4.587	4.92	5.258
11.94	3.81	4.79		11.94	4.46	4.93	5.196
11.95	3.82	4.836		11.95	4.514	4.843	5.223
11.96	3.85	4.73		11.96	4.47	4.882	5.176
11.97	3.85	4.765		11.97	4.465	4.876	5.189
11.98	3.87	4.809		11.98	4.462	4.905	5.184
11.99	3.82	4.855		11.99	4.55	4.886	5.245
12	3.92	4.855		12	4.521	4.913	5.228
12.01	3.8	4.817		12.01	4.51	4.755	5.182
12.02	3.84	4.783		12.02	4.507	4.869	5.218
12.03	3.94	4.846		12.03	4.524	4.771	5.242
12.04	3.95	4.872		12.04	4.585	4.85	5.285
12.05	3.82	4.974		12.05	4.596	4.863	5.252
12.06	3.89	4.886		12.06	4.543	4.754	5.248
12.07	3.94	4.831		12.07	4.532	4.764	5.256
12.08	3.82	4.88		12.08	4.531	4.771	5.232
12.09	3.87	4.856		12.09	4.564	4.739	5.208
12.1	3.8	4.828		12.1	4.646	4.889	5.277
12.11	4	4.897		12.11	4.586	4.865	5.289
12.12	3.85	4.951		12.12	4.711	4.873	5.322
12.13	3.85	4.815		12.13	4.57	4.847	5.237
12.14	3.82	4.905		12.14	4.605	4.839	5.312
12.15	3.89	4.861		12.15	4.613	4.843	5.321
12.16	3.83	4.911		12.16	4.647	4.855	5.28
12.17	3.91	4.844		12.17	4.613	4.85	5.281
12.18	3.83	4.876		12.18	4.556	4.772	5.273
12.19	3.85	4.812		12.19	4.549	4.836	5.289
12.2	3.87	4.844		12.2	4.625	4.857	5.258
12.21	3.78	4.834		12.21	4.588	4.768	5.236
12.22	3.85	4.835		12.22	4.585	4.786	5.182
12.23	3.87	4.872		12.23	4.525	4.821	5.254
12.24	3.9	4.867		12.24	4.623	4.849	5.349
12.25	3.89	4.812		12.25	4.593	4.877	5.225
12.26	3.8	4.831		12.26	4.497	4.795	5.221
12.27	3.88	4.868		12.27	4.595	4.836	5.236
12.28	3.9	4.9		12.28	4.622	4.807	5.355
12.29	3.91	4.928		12.29	4.552	4.827	5.295
12.3	3.91	4.84		12.3	4.515	4.728	5.223
12.31	3.87	4.801		12.31	4.535	4.832	5.238
12.32	3.85	4.856		12.32	4.529	4.855	5.306
12.33	3.8	4.831		12.33	4.501	4.779	5.175
12.34	3.92	4.895		12.34	4.587	4.814	5.325
12.35	3.84	4.856		12.35	4.503	4.771	5.245
12.36	3.85	4.802		12.36	4.483	4.728	5.211
12.37	3.86	4.892		12.37	4.544	4.748	5.205
12.38	3.84	4.815		12.38	4.507	4.741	5.206
12.39	3.94	4.882		12.39	4.636	4.886	5.36
12.4	3.91	4.867		12.4	4.581	4.798	5.285
12.41	3.78	4.872		12.41	4.61	4.797	5.268
12.42	3.88	4.897		12.42	4.634	4.882	5.345
12.43	3.9	4.906		12.43	4.576	4.802	5.201
12.44	3.93	4.908		12.44	4.547	4.812	5.262
12.45	3.93	4.832		12.45	4.523	4.802	5.292
12.46	3.68	4.847		12.46	4.533	4.815	5.259
12.47	4.01	4.824		12.47	4.488	4.704	5.233
12.48	3.84	4.882		12.48	4.513	4.823	5.356
12.49	3.92	4.933		12.49	4.472	4.993	5.264
12.5	3.82	4.814		12.5	4.519	4.94	5.214
12.51	3.88	4.918		12.51	4.57	4.932	5.353
12.52	3.86	4.806		12.52	4.534	4.99	5.265
12.53	3.83	4.734		12.53	4.49	4.802	5.216
12.54	3.89	4.836		12.54	4.534	4.949	5.258
12.55	3.82	4.87		12.55	4.563	4.9	5.27
12.56	3.8	4.847		12.56	4.53	5.003	5.229
12.57	3.91	4.817		12.57	4.519	4.92	5.279
12.58	3.82	4.828		12.58	4.534	4.834	5.245
12.59	3.88	4.886		12.59	4.539	4.917	5.304
12.6	3.81	4.872		12.6	4.587	4.927	5.221
12.61	3.82	4.948		12.61	4.636	4.955	5.313
12.62	3.84	4.833		12.62	4.538	4.887	5.265
12.63	3.81	4.849		12.63	4.484	4.801	5.154
12.64	3.83	4.821		12.64	4.511	4.744	5.338
12.65	3.83	4.838		12.65	4.471	4.742	5.228
12.66	3.87	4.777		12.66	4.455	4.738	5.238
12.67	3.83	4.786		12.67	4.508	4.726	5.317
12.68	3.77	4.825		12.68	4.514	4.789	5.251
12.69	3.81	4.796		12.69	4.518	4.757	5.191
12.7	3.92	4.787		12.7	4.513	4.85	5.186
12.71	3.9	4.831		12.71	4.483	4.825	5.221
12.72	3.83	4.873		12.72	4.619	4.905	5.299
12.73	3.79	4.774		12.73	4.594	4.921	5.265
12.74	3.89	4.824		12.74	4.577	4.922	5.266
12.75	3.86	4.831		12.75	4.536	4.876	5.219
12.76	3.85	4.819		12.76	4.49	4.878	5.161
12.77	3.9	4.824		12.77	4.522	4.926	5.236
12.78	3.89	4.793		12.78	4.552	4.88	5.182
12.79	3.77	4.836		12.79	4.513	4.87	5.222
12.8	3.89	4.844		12.8	4.514	4.667	5.348
12.81	3.85	4.856		12.81	4.501	4.928	5.3
12.82	3.92	4.881		12.82	4.51	4.863	5.284
12.83	3.93	4.849		12.83	4.499	4.908	5.241
12.84	3.78	4.826		12.84	4.439	4.649	5.222
12.85	3.9	4.871		12.85	4.436	4.66	5.215
12.86	3.85	4.888		12.86	4.428	4.762	5.221
12.87	3.88	4.861		12.87	4.417	4.598	5.2
12.88	3.87	4.86		12.88	4.475	4.574	5.262
12.89	3.79	4.894		12.89	4.458	4.689	5.216
12.9	3.85	4.892		12.9	4.446	4.7	5.288
12.91	3.77	4.832		12.91	4.496	4.78	5.25
12.92	3.85	4.829		12.92	4.368	4.674	5.129
12.93	3.74	4.837		12.93	4.388	4.571	5.156
12.94	3.87	4.866		12.94	4.446	4.5	5.15
12.95	3.85	4.878		12.95	4.389	4.638	5.196
12.96	3.91	4.827		12.96	4.41	4.619	5.16
12.97	3.86	4.818		12.97	4.433	4.593	5.195
12.98	3.94	4.911		12.98	4.457	4.746	5.282
12.99	3.82	4.883		12.99	4.479	4.75	5.215
13	3.79	4.863		13	4.454	4.589	5.16
13.01	3.9	4.886		13.01	4.526	4.749	5.163
13.02	3.89	4.879		13.02	4.584	4.742	5.235
13.03	3.91	4.835		13.03	4.443	4.931	5.186
13.04	3.88	4.898		13.04	4.459	4.872	5.18
13.05	3.81	4.907		13.05	4.471	4.717	5.214
13.06	3.78	4.816		13.06	4.459	4.787	5.21
13.07	3.71	4.862		13.07	4.42	4.67	5.137
13.08	3.76	4.902		13.08	4.433	4.627	5.116
13.09	3.83	4.845		13.09	4.493	4.572	5.116
13.1	3.81	4.903		13.1	4.505	4.743	5.166
13.11	3.87	4.814		13.11	4.486	4.696	5.143
13.12	3.83	4.889		13.12	4.534	4.849	5.237
13.13	3.85	4.924		13.13	4.539	4.781	5.245
13.14	3.94	4.83		13.14	4.474	4.797	5.138
13.15	3.88	4.8		13.15	4.499	4.871	5.22
13.16	3.82	4.898		13.16	4.499	4.881	5.194
13.17	3.96	4.888		13.17	4.578	4.916	5.282
13.18	3.85	4.873		13.18	4.565	4.884	5.226
13.19	3.82	4.866		13.19	4.613	4.932	5.214
13.2	3.89	4.828		13.2	4.489	4.93	5.184
13.21	3.88	4.876		13.21	4.529	4.97	5.262
13.22	3.82	4.878		13.22	4.524	4.993	5.263
13.23	3.9	4.85		13.23	4.511	4.706	5.218
13.24	3.89	4.776		13.24	4.493	4.698	5.209
13.25	3.79	4.822		13.25	4.545	4.657	5.153
13.26	3.81	4.868		13.26	4.554	4.749	5.169
13.27	3.8	4.823		13.27	4.551	4.844	5.292
13.28	3.83	4.846		13.28	4.499	4.78	5.195
13.29	3.95	4.849		13.29	4.462	4.801	5.213
13.3	3.91	4.837		13.3	4.506	4.68	5.248
13.31	3.82	4.835		13.31	4.509	4.637	5.188
13.32	3.83	4.82		13.32	4.476	4.725	5.187
13.33	3.88	4.845		13.33	4.551	4.765	5.244
13.34	3.84	4.858		13.34	4.486	4.698	5.192
13.35	3.82	4.806		13.35	4.434	4.653	5.136
13.36	3.82	4.779		13.36	4.495	4.719	5.213
13.37	3.77	4.848		13.37	4.418	4.475	5.083
13.38	3.82	4.805		13.38	4.385	4.547	5.054
13.39	3.85	4.794		13.39	4.438	4.647	5.135
13.4	3.87	4.81		13.4	4.341	4.513	5.113
13.41	3.81	4.851		13.41	4.462	4.613	5.114
13.42	3.84	4.852		13.42	4.449	4.65	5.112
13.43	3.88	4.801		13.43	4.459	4.576	5.169
13.44	4	4.754		13.44	4.445	4.46	5.133
13.45	3.84	4.806		13.45	4.44	4.671	5.255
13.46	3.85	4.936		13.46	4.509	4.677	5.244
13.47	3.85	4.733		13.47	4.456	4.651	5.238
13.48	3.87	4.805		13.48	4.434	4.59	5.192
13.49	3.8	4.851		13.49	4.532	4.786	5.234
13.5	3.79	4.866		13.5	4.48	4.627	5.26
13.51	3.9	4.813		13.51	4.518	4.535	5.131
13.52	3.88	4.86		13.52	4.466	4.656	5.228
13.53	3.86	4.817		13.53	4.476	4.708	5.18
13.54	3.82	4.751		13.54	4.462	4.642	5.115
13.55	3.99	4.764		13.55	4.355	4.619	5.084
13.56	3.88	4.804		13.56	4.484	4.767	5.232
13.57	3.8	4.774		13.57	4.459	4.726	5.158
13.58	3.96	4.848		13.58	4.429	4.669	5.128
13.59	3.82	4.794		13.59	4.382	4.668	5.23
13.6	3.83	4.756		13.6	4.348	4.578	5.086
13.61	3.88	4.731		13.61	4.327	4.655	5.193
13.62	3.75	4.763		13.62	4.345	4.786	5.21
13.63	3.88	4.783		13.63	4.344	4.714	5.148
13.64	3.81	4.786		13.64	4.377	4.831	5.203
13.65	3.87	4.839		13.65	4.439	4.851	5.198
13.66	3.95	4.755		13.66	4.451	4.835	5.29
13.67	3.79	4.813		13.67	4.397	4.836	5.193
13.68	3.89	4.752		13.68	4.406	4.891	5.195
13.69	3.91	4.866		13.69	4.459	4.943	5.178
13.7	3.78	4.721		13.7	4.407	4.827	5.179
13.71	3.9	4.845		13.71	4.458	4.897	5.238
13.72	3.83	4.811		13.72	4.453	4.693	5.211
13.73	3.94	4.82		13.73	4.469	4.777	5.208
13.74	3.88	4.809		13.74	4.446	4.596	5.139
13.75	3.78	4.812		13.75	4.474	4.744	5.182
13.76	3.77	4.792		13.76	4.487	4.696	5.154
13.77	3.74	4.841		13.77	4.466	4.657	5.186
13.78	3.81	4.788		13.78	4.444	4.652	5.093
13.79	3.83	4.812		13.79	4.414	4.576	5.15
13.8	3.8	4.748		13.8	4.421	4.613	5.081
13.81	3.81	4.784		13.81	4.466	4.63	5.081
13.82	3.9	4.803		13.82	4.382	4.671	5.163
13.83	3.86	4.78		13.83	4.429	4.648	5.196
13.84	3.81	4.787		13.84	4.429	4.715	5.153
13.85	3.81	4.728		13.85	4.394	4.684	5.149
13.86	3.81	4.746		13.86	4.441	4.691	5.163
13.87	3.87	4.772		13.87	4.438	4.652	5.12
13.88	3.91	4.843		13.88	4.426	4.738	5.149
13.89	3.85	4.742		13.89	4.431	4.83	5.101
13.9	3.9	4.743		13.9	4.477	4.848	5.154
13.91	3.83	4.742		13.91	4.437	4.807	5.096
13.92	3.85	4.795		13.92	4.475	4.87	5.155
13.93	3.89	4.792		13.93	4.489	4.876	5.117
13.94	3.85	4.765		13.94	4.454	4.821	5.119
13.95	3.8	4.777		13.95	4.446	4.84	5.127
13.96	3.89	4.882		13.96	4.483	4.886	5.115
13.97	3.84	4.834		13.97	4.5	4.724	5.14
13.98	3.85	4.797		13.98	4.426	4.705	5.162
13.99	3.8	4.76		13.99	4.425	4.704	5.132
14	3.91	4.807		14	4.424	4.643	5.116
14.01	3.78	4.768		14.01	4.454	4.837	5.099
14.02	3.79	4.795		14.02	4.42	4.8	5.124
14.03	3.83	4.806		14.03	4.48	4.842	5.14
14.04	3.92	4.869		14.04	4.499	4.85	5.184
14.05	3.77	4.751		14.05	4.475	4.853	5.198
14.06	3.89	4.851		14.06	4.413	4.779	5.098
14.07	3.87	4.845		14.07	4.51	4.875	5.238
14.08	3.85	4.794		14.08	4.465	4.778	5.129
14.09	3.94	4.867		14.09	4.483	4.876	5.176
14.1	3.78	4.828		14.1	4.431	4.846	5.191
14.11	3.8	4.805		14.11	4.434	4.714	5.167
14.12	3.8	4.776		14.12	4.447	4.633	5.115
14.13	3.83	4.785		14.13	4.44	4.818	5.152
14.14	3.88	4.84		14.14	4.47	4.872	5.112
14.15	3.75	4.84		14.15	4.52	4.842	5.11
14.16	3.85	4.841		14.16	4.429	4.77	5.069
14.17	3.82	4.832		14.17	4.467	4.747	5.158
14.18	3.81	4.858		14.18	4.41	4.698	5.166
14.19	3.86	4.757		14.19	4.501	4.847	5.223
14.2	3.85	4.842		14.2	4.518	4.768	5.259
14.21	3.82	4.865		14.21	4.469	4.713	5.158
14.22	3.84	4.829		14.22	4.465	4.691	5.121
14.23	3.82	4.803		14.23	4.553	4.931	5.244
14.24	3.85	4.823		14.24	4.516	4.904	5.201
14.25	3.83	4.873		14.25	4.467	4.885	5.188
14.26	3.9	4.873		14.26	4.534	4.774	5.199
14.27	3.78	4.836		14.27	4.58	4.822	5.218
14.28	3.96	4.864		14.28	4.523	4.735	5.147
14.29	3.8	4.896		14.29	4.485	4.894	5.16
14.3	3.93	4.871		14.3	4.574	4.921	5.214
14.31	3.88	4.928		14.31	4.574	4.898	5.131
14.32	3.87	4.899		14.32	4.531	4.92	5.244
14.33	3.9	4.945		14.33	4.533	4.917	5.223
14.34	3.89	4.816		14.34	4.427	4.783	5.141
14.35	3.93	4.79		14.35	4.451	4.618	5.102
14.36	3.85	4.871		14.36	4.469	4.697	5.128
14.37	3.82	4.78		14.37	4.406	4.668	5.08
14.38	3.86	4.817		14.38	4.459	4.758	5.108
14.39	3.89	4.781		14.39	4.419	4.747	5.172
14.4	3.91	4.873		14.4	4.496	4.694	5.159
14.41	4	4.795		14.41	4.414	4.566	5.114
14.42	3.98	4.772		14.42	4.432	4.653	5.121
14.43	3.82	4.868		14.43	4.425	4.705	5.206
14.44	3.81	4.802		14.44	4.411	4.668	5.16
14.45	3.86	4.806		14.45	4.378	4.649	5.112
14.46	3.74	4.821		14.46	4.42	4.657	5.171
14.47	3.89	4.82		14.47	4.419	4.706	5.167
14.48	3.82	4.852		14.48	4.404	4.656	5.124
14.49	3.83	4.791		14.49	4.421	4.646	5.14
14.5	3.88	4.775		14.5	4.45	4.68	5.137
14.51	3.83	4.839		14.51	4.501	4.735	5.264
14.52	3.74	4.817		14.52	4.444	4.708	5.148
14.53	3.83	4.76		14.53	4.431	4.827	5.092
14.54	3.85	4.841		14.54	4.48	4.808	5.2
14.55	3.82	4.814		14.55	4.433	4.752	5.143
14.56	3.82	4.819		14.56	4.447	4.734	5.152
14.57	3.85	4.884		14.57	4.485	4.717	5.21
14.58	3.89	4.858		14.58	4.445	4.704	5.157
14.59	3.84	4.824		14.59	4.502	4.866	5.249
14.6	3.83	5		14.6	4.498	4.74	5.161
14.61	3.88	4.979		14.61	4.489	4.778	5.228
14.62	3.92	4.853		14.62	4.475	4.775	5.233
14.63	3.85	4.813		14.63	4.449	4.829	5.24
14.64	3.8	4.82		14.64	4.434	4.737	5.151
14.65	3.77	4.876		14.65	4.508	4.719	5.153
14.66	3.78	4.903		14.66	4.428	4.773	5.198
14.67	3.91	4.877		14.67	4.432	4.738	5.142
14.68	3.78	4.86		14.68	4.447	4.643	5.065
14.69	3.95	4.78		14.69	4.398	4.714	5.202
14.7	3.87	4.876		14.7	4.442	4.777	5.164
14.71	3.81	4.836		14.71	4.55	4.799	5.172
14.72	4.04	4.868		14.72	4.503	4.756	5.229
14.73	3.78	4.822		14.73	4.469	4.669	5.205
14.74	3.94	4.886		14.74	4.544	4.787	5.255
14.75	3.87	4.826		14.75	4.48	4.775	5.141
14.76	3.85	4.907		14.76	4.472	4.761	5.166
14.77	3.88	4.823		14.77	4.508	4.71	5.169
14.78	3.78	4.904		14.78	4.534	4.805	5.192
14.79	3.82	4.875		14.79	4.452	4.798	5.181
14.8	3.84	4.801		14.8	4.533	4.756	5.261
14.81	3.79	4.795		14.81	4.497	4.728	5.156
14.82	3.92	4.836		14.82	4.43	4.668	5.117
14.83	3.9	4.864		14.83	4.489	4.748	5.157
14.84	3.82	4.781		14.84	4.429	4.736	5.149
14.85	3.83	4.889		14.85	4.444	4.699	5.168
14.86	3.85	4.797		14.86	4.432	4.679	5.136
14.87	3.77	4.819		14.87	4.416	4.711	5.154
14.88	3.84	4.791		14.88	4.471	4.777	5.202
14.89	3.91	4.807		14.89	4.44	4.861	5.171
14.9	3.85	4.821		14.9	4.441	4.721	5.119
14.91	3.71	4.853		14.91	4.466	4.696	5.202
14.92	3.87	4.882		14.92	4.337	4.712	5.205
14.93	3.8	4.834		14.93	4.443	4.753	5.226
14.94	3.9	4.818		14.94	4.417	4.95	5.225
14.95	3.91	4.824		14.95	4.457	5.007	5.179
14.96	3.85	4.83		14.96	4.481	4.838	5.205
14.97	3.87	4.926		14.97	4.525	4.877	5.238
14.98	3.83	4.812		14.98	4.582	4.972	5.207
14.99	3.81	4.925		14.99	4.591	5.056	5.322
15	3.8	4.819		15	4.429	4.893	5.148
15.01	3.9	4.797		15.01	4.436	4.689	5.12
15.02	3.88	4.734		15.02	4.394	4.685	5.181
15.03	3.78	4.801		15.03	4.44	4.701	5.144
15.04	3.78	4.8		15.04	4.387	4.684	5.08
15.05	3.72	4.806		15.05	4.513	4.698	5.162
15.06	3.79	4.855		15.06	4.499	4.773	5.217
15.07	3.86	4.882		15.07	4.536	4.836	5.248
15.08	3.79	4.775		15.08	4.554	4.826	5.26
15.09	3.89	4.782		15.09	4.53	4.778	5.218
15.1	3.87	4.78		15.1	4.549	4.744	5.173
15.11	3.82	4.765		15.11	4.52	4.721	5.191
15.12	3.76	4.837		15.12	4.496	4.734	5.22
15.13	3.79	4.842		15.13	4.537	4.773	5.183
15.14	3.88	4.865		15.14	4.569	4.776	5.226
15.15	3.9	4.854		15.15	4.595	4.871	5.228
15.16	3.76	4.846		15.16	4.518	4.806	5.148
15.17	3.77	4.856		15.17	4.506	4.775	5.191
15.18	3.81	4.8		15.18	4.491	4.887	5.153
15.19	3.84	4.84		15.19	4.504	4.935	5.181
15.2	3.87	4.815		15.2	4.491	4.916	5.182
15.21	3.83	4.861		15.21	4.511	4.702	5.175
15.22	4	4.858		15.22	4.472	4.62	5.157
15.23	3.9	4.801		15.23	4.504	4.724	5.162
15.24	3.81	4.795		15.24	4.467	4.807	5.186
15.25	3.86	4.807		15.25	4.475	4.765	5.172
15.26	3.78	4.837		15.26	4.469	4.785	5.176
15.27	3.96	4.869		15.27	4.52	4.843	5.235
15.28	3.84	4.783		15.28	4.466	4.776	5.174
15.29	3.91	4.906		15.29	4.578	4.869	5.282
15.3	3.76	4.813		15.3	4.551	4.814	5.207
15.31	3.94	4.887		15.31	4.556	4.895	5.304
15.32	3.84	4.868		15.32	4.57	4.856	5.293
15.33	3.88	4.925		15.33	4.53	4.853	5.232
15.34	3.91	4.78		15.34	4.429	4.804	5.283
15.35	3.83	4.881		15.35	4.471	4.834	5.305
15.36	3.77	4.907		15.36	4.526	4.808	5.269
15.37	3.86	4.836		15.37	4.507	4.77	5.318
15.38	3.88	4.873		15.38	4.496	4.791	5.29
15.39	3.87	4.795		15.39	4.433	4.713	5.228
15.4	3.84	4.879		15.4	4.597	4.831	5.224
15.41	3.85	4.896		15.41	4.589	5.002	5.217
15.42	3.93	4.913		15.42	4.639	5.057	5.29
15.43	3.79	4.864		15.43	4.495	4.95	5.163
15.44	3.87	4.874		15.44	4.5	4.835	5.197
15.45	3.9	4.924		15.45	4.588	4.988	5.256
15.46	3.81	4.787		15.46	4.502	4.964	5.176
15.47	3.82	4.831		15.47	4.487	4.889	5.187
15.48	3.8	4.821		15.48	4.53	4.972	5.258
15.49	3.88	4.826		15.49	4.446	4.937	5.154
15.5	3.93	4.866		15.5	4.505	4.892	5.171
15.51	3.88	4.81		15.51	4.476	4.854	5.199
15.52	3.81	4.834		15.52	4.492	4.917	5.178
15.53	3.73	4.874		15.53	4.481	4.954	5.182
15.54	3.84	4.856		15.54	4.477	4.963	5.144
15.55	3.91	4.848		15.55	4.495	4.716	5.152
15.56	3.87	4.801		15.56	4.501	4.848	5.258
15.57	3.93	4.846		15.57	4.516	4.824	5.334
15.58	3.81	4.82		15.58	4.522	4.844	5.22
15.59	3.85	4.807		15.59	4.517	4.815	5.27
15.6	3.97	4.752		15.6	4.507	4.874	5.237
15.61	3.94	4.794		15.61	4.469	4.848	5.304
15.62	3.81	4.823		15.62	4.479	4.764	5.347
15.63	3.76	4.89		15.63	4.53	4.844	5.316
15.64	3.83	4.858		15.64	4.507	4.789	5.278
15.65	3.84	4.836		15.65	4.512	4.777	5.23
15.66	3.82	4.891		15.66	4.52	4.906	5.316
15.67	3.86	4.842		15.67	4.543	4.777	5.251
15.68	3.91	4.89		15.68	4.556	4.876	5.27
15.69	3.86	4.933		15.69	4.596	4.946	5.311
15.7	3.84	4.909		15.7	4.516	4.815	5.184
15.71	3.91	4.805		15.71	4.555	4.826	5.156
15.72	3.84	4.818		15.72	4.544	4.875	5.219
15.73	3.91	4.869		15.73	4.53	4.741	5.199
15.74	3.85	4.929		15.74	4.506	4.773	5.246
15.75	3.81	4.87		15.75	4.505	4.835	5.173
15.76	3.79	4.818		15.76	4.516	4.79	5.168
15.77	3.82	4.863		15.77	4.512	4.838	5.176
15.78	3.76	4.81		15.78	4.565	4.837	5.219
15.79	3.8	4.9		15.79	4.548	5.059	5.262
15.8	3.95	4.841		15.8	4.536	4.961	5.245
15.81	3.88	4.907		15.81	4.526	4.932	5.265
15.82	3.88	4.843		15.82	4.525	4.828	5.209
15.83	3.95	4.866		15.83	4.6	4.969	5.229
15.84	3.83	4.764		15.84	4.544	4.766	5.163
15.85	3.74	4.841		15.85	4.519	4.904	5.158
15.86	3.89	4.76		15.86	4.487	4.909	5.101
15.87	3.84	4.808		15.87	4.438	4.845	5.073
15.88	3.91	4.844		15.88	4.541	4.924	5.219
15.89	3.82	4.854		15.89	4.524	4.879	5.16
15.9	3.85	4.776		15.9	4.585	4.918	5.239
15.91	3.81	4.896		15.91	4.566	4.941	5.185
15.92	3.85	4.788		15.92	4.572	4.896	5.231
15.93	3.93	4.83		15.93	4.597	4.981	5.248
15.94	3.92	4.788		15.94	4.54	4.917	5.178
15.95	3.85	4.868		15.95	4.612	4.962	5.226
15.96	3.77	4.801		15.96	4.514	4.901	5.213
15.97	3.82	4.871		15.97	4.567	4.963	5.235
15.98	3.87	4.826		15.98	4.586	4.769	5.184
15.99	3.85	4.874		15.99	4.552	4.656	5.169
16	3.84	4.877		16	4.518	4.782	5.217
16.01	3.78	4.86		16.01	4.524	4.712	5.211
16.02	3.9	4.804		16.02	4.481	4.696	5.17
16.03	3.78	4.779		16.03	4.476	4.73	5.136
16.04	3.77	4.825		16.04	4.555	4.656	5.179
16.05	3.89	4.836		16.05	4.518	4.68	5.162
16.06	3.78	4.771		16.06	4.437	4.679	5.2
16.07	3.91	4.771		16.07	4.452	4.726	5.082
16.08	3.87	4.841		16.08	4.475	4.658	5.068
16.09	3.81	4.854		16.09	4.532	4.655	5.121
16.1	3.9	4.811		16.1	4.431	4.876	5.102
16.11	3.81	4.838		16.11	4.443	4.843	5.186
16.12	3.86	4.822		16.12	4.498	4.785	5.19
16.13	3.83	4.822		16.13	4.45	4.679	5.135
16.14	3.85	4.861		16.14	4.514	4.714	5.144
16.15	3.77	4.847		16.15	4.515	4.574	5.139
16.16	3.81	4.781		16.16	4.485	4.628	5.101
16.17	3.86	4.801		16.17	4.444	4.68	5.125
16.18	3.81	4.773		16.18	4.482	4.684	5.104
16.19	3.73	4.769		16.19	4.417	4.673	5.116
16.2	3.9	4.865		16.2	4.455	4.637	5.139
16.21	3.77	4.844		16.21	4.537	4.74	5.215
16.22	3.88	4.773		16.22	4.407	4.721	5.138
16.23	3.94	4.872		16.23	4.491	4.625	5.147
16.24	3.92	4.782		16.24	4.395	4.694	5.149
16.25	3.92	4.846		16.25	4.45	4.714	5.161
16.26	3.85	4.889		16.26	4.529	4.789	5.237
16.27	3.89	4.8		16.27	4.496	4.772	5.23
16.28	3.81	4.82		16.28	4.476	4.731	5.143
16.29	3.85	4.832		16.29	4.484	4.744	5.153
16.3	3.84	4.863		16.3	4.537	4.831	5.242
16.31	3.87	4.925		16.31	4.545	4.871	5.309
16.32	3.85	4.784		16.32	4.521	4.761	5.209
16.33	3.9	4.862		16.33	4.516	4.753	5.169
16.34	3.9	4.733		16.34	4.43	4.69	5.107
16.35	3.8	4.775		16.35	4.49	4.727	5.229
16.36	3.92	4.814		16.36	4.438	4.769	5.202
16.37	3.86	4.8		16.37	4.497	4.763	5.196
16.38	3.86	4.773		16.38	4.509	4.715	5.133
16.39	3.92	4.794		16.39	4.482	4.743	5.166
16.4	3.91	4.806		16.4	4.502	4.71	5.139
16.41	3.87	4.801		16.41	4.472	4.76	5.15
16.42	3.84	4.801		16.42	4.487	4.772	5.166
16.43	3.93	4.787		16.43	4.508	4.944	5.214
16.44	3.87	4.814		16.44	4.487	4.757	5.163
16.45	3.74	4.808		16.45	4.492	4.687	5.088
16.46	3.81	4.84		16.46	4.507	4.701	5.125
16.47	3.84	4.808		16.47	4.459	4.804	5.227
16.48	3.79	4.811		16.48	4.429	4.773	5.214
16.49	3.87	4.833		16.49	4.511	4.82	5.195
16.5	3.88	4.805		16.5	4.488	4.696	5.114
16.51	3.77	4.778		16.51	4.43	4.802	5.177
16.52	3.79	4.772		16.52	4.527	4.832	5.241
16.53	3.8	4.885		16.53	4.576	4.801	5.315
16.54	3.86	4.827		16.54	4.561	4.785	5.268
16.55	3.79	4.838		16.55	4.542	4.762	5.269
16.56	3.83	4.858		16.56	4.593	4.806	5.213
16.57	3.83	4.843		16.57	4.521	4.851	5.286
16.58	3.8	4.827		16.58	4.512	4.801	5.236
16.59	3.96	4.847		16.59	4.543	4.921	5.32
16.6	3.93	4.855		16.6	4.577	4.922	5.338
16.61	3.83	4.873		16.61	4.493	4.859	5.263
16.62	3.82	4.846		16.62	4.519	4.756	5.225
16.63	3.9	4.785		16.63	4.432	4.838	5.157
16.64	3.82	4.861		16.64	4.482	4.807	5.2
16.65	3.85	4.813		16.65	4.413	4.795	5.164
16.66	3.84	4.788		16.66	4.422	4.822	5.19
16.67	3.74	4.782		16.67	4.435	4.727	5.082
16.68	3.81	4.821		16.68	4.495	4.788	5.22
16.69	3.77	4.795		16.69	4.423	4.74	5.031
16.7	3.82	4.799		16.7	4.449	4.617	5.074
16.71	3.94	4.856		16.71	4.489	4.779	5.136
16.72	3.87	4.786		16.72	4.458	4.753	5.116
16.73	3.89	4.803		16.73	4.515	4.758	5.169
16.74	3.86	4.919		16.74	4.57	5.012	5.215
16.75	3.8	4.827		16.75	4.567	4.902	5.198
16.76	3.87	4.882		16.76	4.548	4.797	5.195
16.77	3.89	4.853		16.77	4.537	4.701	5.192
16.78	3.79	4.913		16.78	4.522	4.759	5.196
16.79	3.85	4.827		16.79	4.547	4.779	5.21
16.8	4.02	4.792		16.8	4.57	4.786	5.172
16.81	3.84	4.902		16.81	4.546	4.761	5.174
16.82	3.7	4.792		16.82	4.572	4.882	5.249
16.83	3.86	4.884		16.83	4.515	4.838	5.195
16.84	3.87	4.838		16.84	4.553	4.79	5.199
16.85	3.88	4.859		16.85	4.501	4.776	5.168
16.86	3.85	4.888		16.86	4.543	4.758	5.215
16.87	3.78	4.863		16.87	4.529	4.84	5.236
16.88	3.77	4.845		16.88	4.541	4.835	5.182
16.89	3.83	4.945		16.89	4.5	4.811	5.178
16.9	3.85	4.755		16.9	4.432	4.758	5.109
16.91	3.83	4.773		16.91	4.513	4.722	5.102
16.92	3.82	4.816		16.92	4.517	4.729	5.179
16.93	3.93	4.859		16.93	4.489	4.847	5.124
16.94	3.84	4.803		16.94	4.465	4.88	5.197
16.95	3.82	4.871		16.95	4.502	4.844	5.206
16.96	3.79	4.852		16.96	4.478	4.809	5.197
16.97	3.79	4.808		16.97	4.459	4.737	5.095
16.98	3.78	4.817		16.98	4.444	4.82	5.095
16.99	3.8	4.818		16.99	4.455	4.786	5.17
17	3.8	4.82		17	4.486	4.848	5.173
17.01	3.87	4.835		17.01	4.55	4.794	5.194
17.02	3.86	4.772		17.02	4.48	4.688	5.182
17.03	3.91	4.835		17.03	4.562	4.86	5.281
17.04	3.84	4.841		17.04	4.497	4.754	5.148
17.05	3.81	4.863		17.05	4.368	4.755	5.12
17.06	3.9	4.794		17.06	4.328	4.699	5.061
17.07	3.94	4.862		17.07	4.502	4.803	5.169
17.08	3.9	4.766		17.08	4.371	4.716	5.149
17.09	3.73	4.823		17.09	4.354	4.66	5.226
17.1	3.81	4.756		17.1	4.354	4.68	5.153
17.11	3.84	4.827		17.11	4.392	4.698	5.173
17.12	3.9	4.797		17.12	4.464	4.701	5.166
17.13	3.93	4.821		17.13	4.416	4.69	5.127
17.14	3.89	4.832		17.14	4.46	4.69	5.172
17.15	3.85	4.829		17.15	4.443	4.746	5.147
17.16	3.84	4.772		17.16	4.396	4.669	5.11
17.17	3.87	4.823		17.17	4.434	4.684	5.17
17.18	3.78	4.808		17.18	4.513	4.737	5.21
17.19	3.81	4.753		17.19	4.373	4.709	5.204
17.2	3.88	4.801		17.2	4.457	4.719	5.265
17.21	3.75	4.79		17.21	4.463	4.768	5.248
17.22	3.87	4.863		17.22	4.514	4.792	5.169
17.23	3.92	4.869		17.23	4.495	4.794	5.224
17.24	3.89	4.919		17.24	4.388	4.616	5.134
17.25	3.81	4.938		17.25	4.482	4.732	5.181
17.26	3.91	5.025		17.26	4.445	4.681	5.14
17.27	3.75	4.925		17.27	4.47	4.746	5.181
17.28	3.86	4.932		17.28	4.482	4.836	5.234
17.29	3.89	5.022		17.29	4.532	4.867	5.284
17.3	3.88	4.938		17.3	4.41	4.755	5.24
17.31	3.85	4.941		17.31	4.527	4.734	5.152
17.32	3.92	4.914		17.32	4.512	4.735	5.156
17.33	3.95	4.919		17.33	4.524	4.803	5.224
17.34	3.82	4.971		17.34	4.498	4.855	5.201
17.35	3.95	5.007		17.35	4.534	4.788	5.162
17.36	3.87	4.956		17.36	4.491	4.739	5.138
17.37	3.9	4.855		17.37	4.517	4.796	5.111
17.38	3.79	4.934		17.38	4.477	4.81	5.179
17.39	3.87	4.915		17.39	4.402	4.736	5.143
17.4	3.82	4.957		17.4	4.44	4.715	5.167
17.41	3.81	4.864		17.41	4.384	4.727	5.13
17.42	3.73	4.92		17.42	4.485	4.802	5.159
17.43	3.84	4.9		17.43	4.488	4.725	5.187
17.44	3.8	4.895		17.44	4.447	4.839	5.16
17.45	3.85	5.003		17.45	4.525	5.062	5.285
17.46	3.86	4.978		17.46	4.535	5.031	5.228
17.47	3.91	4.924		17.47	4.491	4.93	5.212
17.48	3.91	4.977		17.48	4.483	4.991	5.192
17.49	4	4.975		17.49	4.465	4.975	5.188
17.5	3.88	4.925		17.5	4.457	4.895	5.164
17.51	3.82	4.964		17.51	4.508	4.736	5.211
17.52	3.84	5.023		17.52	4.534	4.837	5.286
17.53	3.82	4.924		17.53	4.5	4.769	5.214
17.54	3.83	4.925		17.54	4.47	4.711	5.11
17.55	3.95	4.881		17.55	4.429	5.034	5.139
17.56	3.99	4.91		17.56	4.478	4.851	5.218
17.57	3.87	4.942		17.57	4.48	4.945	5.228
17.58	3.8	4.995		17.58	4.534	5.029	5.258
17.59	3.86	4.96		17.59	4.523	4.948	5.158
17.6	4.02	4.886		17.6	4.457	4.918	5.165
17.61	3.88	4.961		17.61	4.527	5.028	5.238
17.62	3.83	4.922		17.62	4.535	5.078	5.139
17.63	3.91	4.982		17.63	4.545	4.983	5.213
17.64	3.99	4.982		17.64	4.609	4.865	5.249
17.65	3.83	4.903		17.65	4.512	4.785	5.186
17.66	3.82	4.936		17.66	4.599	4.841	5.234
17.67	3.86	5.008		17.67	4.584	4.861	5.272
17.68	3.89	4.958		17.68	4.599	4.961	5.283
17.69	3.87	4.957		17.69	4.543	4.847	5.219
17.7	3.85	4.995		17.7	4.473	4.774	5.237
17.71	3.82	4.965		17.71	4.438	4.832	5.212
17.72	3.92	4.924		17.72	4.524	4.863	5.252
17.73	3.85	4.935		17.73	4.55	4.779	5.154
17.74	3.88	4.915		17.74	4.434	4.815	5.203
17.75	3.86	4.869		17.75	4.443	4.765	5.2
17.76	3.95	4.952		17.76	4.543	4.788	5.234
17.77	3.86	4.912		17.77	4.505	4.81	5.205
17.78	3.96	4.918		17.78	4.46	4.865	5.239
17.79	3.83	4.998		17.79	4.493	4.846	5.253
17.8	3.78	5.017		17.8	4.504	4.696	5.142
17.81	3.79	4.978		17.81	4.484	4.778	5.129
17.82	3.77	4.89		17.82	4.494	4.725	5.066
17.83	3.79	4.891		17.83	4.417	4.815	5.066
17.84	3.85	5.003		17.84	4.571	4.779	5.177
17.85	3.77	5.007		17.85	4.632	5.015	5.14
17.86	3.98	4.946		17.86	4.522	4.906	5.191
17.87	3.87	4.96		17.87	4.535	4.927	5.187
17.88	3.78	5.011		17.88	4.552	4.92	5.133
17.89	3.91	5.008		17.89	4.575	4.937	5.182
17.9	3.87	5.018		17.9	4.537	4.912	5.121
17.91	3.84	4.991		17.91	4.557	4.947	5.154
17.92	3.81	5.006		17.92	4.575	4.967	5.151
17.93	3.78	4.922		17.93	4.453	4.898	5.041
17.94	3.89	4.959		17.94	4.501	4.917	5.143
17.95	3.8	4.988		17.95	4.531	4.87	5.091
17.96	3.84	5.029		17.96	4.595	4.95	5.168
17.97	3.8	5.035		17.97	4.565	4.953	5.178
17.98	3.79	4.986		17.98	4.579	4.875	5.155
17.99	3.79	5.003		17.99	4.586	5.039	5.192
18	3.88	4.971		18	4.566	4.864	5.067
18.01	3.81	5.022		18.01	4.597	4.974	5.19
18.02	3.87	4.992		18.02	4.539	4.676	5.134
18.03	3.88	5.058		18.03	4.637	4.733	5.185
18.04	3.77	4.987		18.04	4.444	4.681	5.023
18.05	3.83	5.056		18.05	4.542	4.79	5.117
18.06	3.86	5.054		18.06	4.498	4.713	5.108
18.07	3.85	4.839		18.07	4.452	4.675	5.099
18.08	3.89	4.902		18.08	4.574	4.772	5.081
18.09	3.77	4.876		18.09	4.523	4.802	5.138
18.1	3.81	4.842		18.1	4.53	4.709	5.19
18.11	3.94	4.856		18.11	4.526	4.598	5.084
18.12	3.79	4.811		18.12	4.496	4.641	5.084
18.13	3.95	4.811		18.13	4.486	4.753	5.054
18.14	3.89	4.882		18.14	4.5	4.654	5.095
18.15	3.85	4.848		18.15	4.442	4.613	5.058
18.16	3.83	4.8		18.16	4.522	4.723	5.173
18.17	3.77	4.852		18.17	4.509	4.679	5.133
18.18	3.86	4.786		18.18	4.521	4.681	5.138
18.19	3.86	4.876		18.19	4.599	4.723	5.215
18.2	3.9	4.866		18.2	4.56	4.807	5.23
18.21	3.74	4.795		18.21	4.531	4.688	5.182
18.22	3.82	4.804		18.22	4.522	4.712	5.155
18.23	3.97	4.901		18.23	4.646	4.749	5.209
18.24	3.92	4.803		18.24	4.505	4.623	5.074
18.25	3.8	4.962		18.25	4.61	4.813	5.27
18.26	3.73	4.789		18.26	4.536	4.688	5.097
18.27	3.9	4.846		18.27	4.537	4.665	5.187
18.28	3.76	4.825		18.28	4.531	4.683	5.155
18.29	3.75	4.793		18.29	4.547	4.644	5.178
18.3	3.82	4.814		18.3	4.514	4.678	5.118
18.31	3.88	4.844		18.31	4.541	4.677	5.133
18.32	3.8	4.851		18.32	4.574	4.719	5.135
18.33	3.89	4.907		18.33	4.592	4.689	5.133
18.34	3.89	4.846		18.34	4.542	4.704	5.144
18.35	3.77	4.808		18.35	4.497	4.718	5.16
18.36	3.93	4.772		18.36	4.466	4.811	5.127
18.37	3.84	4.851		18.37	4.424	4.639	5.088
18.38	3.93	4.843		18.38	4.5	4.765	5.195
18.39	3.81	4.796		18.39	4.468	4.724	5.079
18.4	3.87	4.814		18.4	4.557	4.839	5.241
18.41	3.76	4.853		18.41	4.563	4.715	5.114
18.42	3.9	4.842		18.42	4.519	4.771	5.182
18.43	3.8	4.813		18.43	4.512	4.827	5.119
18.44	3.88	4.82		18.44	4.585	4.725	5.185
18.45	3.82	4.851		18.45	4.582	4.837	5.162
18.46	3.83	4.854		18.46	4.592	4.621	5.149
18.47	3.81	4.808		18.47	4.572	4.68	5.155
18.48	3.85	4.849		18.48	4.48	4.65	5.118
18.49	3.91	4.776		18.49	4.477	4.778	5.152
18.5	3.75	4.831		18.5	4.537	4.77	5.199
18.51	3.9	4.848		18.51	4.488	4.736	5.168
18.52	3.86	4.783		18.52	4.41	4.705	5.149
18.53	3.83	4.834		18.53	4.567	4.7	5.11
18.54	3.82	4.888		18.54	4.475	4.798	5.196
18.55	3.87	4.864		18.55	4.458	4.7	5.126
18.56	3.9	4.925		18.56	4.531	4.772	5.209
18.57	3.83	4.808		18.57	4.504	4.651	5.19
18.58	3.81	4.789		18.58	4.441	4.675	5.141
18.59	3.73	4.788		18.59	4.485	4.775	5.206
18.6	3.88	4.78		18.6	4.5	4.694	5.231
18.61	3.97	4.795		18.61	4.511	4.646	5.194
18.62	3.86	4.822		18.62	4.527	4.686	5.24
18.63	3.79	4.789		18.63	4.518	4.747	5.222
18.64	3.82	4.855		18.64	4.532	4.768	5.242
18.65	3.87	4.921		18.65	4.575	4.717	5.201
18.66	3.9	4.847		18.66	4.47	4.639	5.103
18.67	3.97	4.853		18.67	4.477	4.729	5.167
18.68	3.91	4.849		18.68	4.578	4.804	5.178
18.69	3.85	4.836		18.69	4.476	4.733	5.225
18.7	3.82	4.81		18.7	4.532	4.726	5.196
18.71	3.88	4.841		18.71	4.477	4.775	5.231
18.72	3.87	4.784		18.72	4.42	4.7	5.166
18.73	3.84	4.797		18.73	4.422	4.644	5.149
18.74	3.89	4.805		18.74	4.503	4.831	5.268
18.75	3.8	4.751		18.75	4.384	4.825	5.129
18.76	3.89	4.865		18.76	4.455	4.87	5.127
18.77	3.83	4.741		18.77	4.432	4.913	5.168
18.78	3.93	4.907		18.78	4.533	4.892	5.244
18.79	3.88	4.811		18.79	4.514	4.964	5.261
18.8	3.86	4.791		18.8	4.458	4.946	5.129
18.81	3.8	4.775		18.81	4.481	4.934	5.188
18.82	3.9	4.846		18.82	4.449	4.835	5.19
18.83	3.89	4.83		18.83	4.542	4.776	5.256
18.84	3.8	4.842		18.84	4.482	4.732	5.182
18.85	3.89	4.842		18.85	4.49	4.702	5.126
18.86	3.91	4.753		18.86	4.404	4.706	5.141
18.87	3.92	4.805		18.87	4.464	4.738	5.163
18.88	3.91	4.801		18.88	4.478	4.822	5.232
18.89	3.89	4.784		18.89	4.485	4.83	5.191
18.9	3.84	4.821		18.9	4.481	4.806	5.145
18.91	3.88	4.814		18.91	4.473	4.804	5.166
18.92	3.83	4.815		18.92	4.551	4.766	5.222
18.93	3.86	4.779		18.93	4.478	4.78	5.218
18.94	3.83	4.816		18.94	4.505	4.644	5.085
18.95	3.8	4.832		18.95	4.504	4.727	5.09
18.96	3.78	4.767		18.96	4.547	4.772	5.161
18.97	3.89	4.759		18.97	4.493	4.779	5.127
18.98	3.85	4.755		18.98	4.493	4.66	5.111
18.99	3.81	4.83		18.99	4.46	4.761	5.142
19	3.87	4.779		19	4.459	4.746	5.052
19.01	3.82	4.797		19.01	4.468	4.74	5.135
19.02	3.86	4.782		19.02	4.512	4.853	5.145
19.03	3.83	4.838		19.03	4.506	4.809	5.151
19.04	3.88	4.757		19.04	4.463	4.711	5.113
19.05	3.87	4.885		19.05	4.552	4.844	5.248
19.06	3.91	4.905		19.06	4.57	4.914	5.246
19.07	3.76	4.864		19.07	4.53	4.905	5.273
19.08	3.8	4.84		19.08	4.424	4.866	5.043
19.09	3.89	4.891		19.09	4.481	4.993	5.068
19.1	3.84	4.785		19.1	4.493	4.938	5.123
19.11	3.92	4.778		19.11	4.454	4.897	5.092
19.12	3.88	4.847		19.12	4.552	4.915	5.202
19.13	3.81	4.814		19.13	4.447	4.913	5.166
19.14	3.84	4.832		19.14	4.463	4.92	5.11
19.15	3.88	4.801		19.15	4.486	4.904	5.139
19.16	3.8	4.767		19.16	4.429	4.611	5.04
19.17	3.8	4.812		19.17	4.492	4.654	5.108
19.18	3.85	4.834		19.18	4.526	4.848	5.164
19.19	3.86	4.803		19.19	4.422	4.669	5.094
19.2	3.82	4.801		19.2	4.477	4.736	5.145
19.21	3.87	4.836		19.21	4.521	4.741	5.099
19.22	3.9	4.884		19.22	4.469	4.761	5.127
19.23	3.85	4.806		19.23	4.457	4.766	5.112
19.24	3.74	4.817		19.24	4.419	4.664	5.071
19.25	3.91	4.805		19.25	4.483	4.813	5.151
19.26	3.89	4.8		19.26	4.541	4.753	5.168
19.27	3.94	4.779		19.27	4.483	4.701	5.155
19.28	3.94	4.792		19.28	4.505	4.963	5.147
19.29	3.84	4.658		19.29	4.505	4.89	5.082
19.3	3.82	4.736		19.3	4.436	4.845	5.032
19.31	3.89	4.801		19.31	4.48	4.906	5.194
19.32	3.98	4.871		19.32	4.621	4.987	5.157
19.33	3.91	4.766		19.33	4.516	4.694	5.123
19.34	3.76	4.805		19.34	4.493	4.719	5.112
19.35	3.85	4.777		19.35	4.518	4.853	5.108
19.36	3.8	4.827		19.36	4.521	4.884	5.156
19.37	3.91	4.829		19.37	4.503	4.853	5.111
19.38	3.81	4.8		19.38	4.483	4.811	5.133
19.39	3.81	4.736		19.39	4.448	4.69	5.12
19.4	3.81	4.831		19.4	4.537	4.8	5.256
19.41	3.9	4.888		19.41	4.576	4.77	5.173
19.42	3.79	4.879		19.42	4.551	4.758	5.186
19.43	3.81	4.786		19.43	4.538	4.718	5.144
19.44	3.81	4.76		19.44	4.44	4.704	5.116
19.45	3.91	4.757		19.45	4.544	4.776	5.167
19.46	3.83	4.8		19.46	4.535	4.8	5.163
19.47	3.91	4.735		19.47	4.469	4.622	5.141
19.48	3.87	4.873		19.48	4.501	4.744	5.248
19.49	3.83	4.816		19.49	4.498	4.839	5.222
19.5	3.93	4.831		19.5	4.544	4.749	5.111
19.51	3.79	4.811		19.51	4.569	4.755	5.203
19.52	3.92	4.888		19.52	4.582	4.798	5.208
19.53	3.82	4.801		19.53	4.582	4.712	5.182
19.54	3.79	4.956		19.54	4.667	4.849	5.226
19.55	3.93	4.763		19.55	4.535	4.706	5.191
19.56	3.75	4.829		19.56	4.477	4.659	5.166
19.57	3.77	4.836		19.57	4.485	4.749	5.201
19.58	3.84	4.836		19.58	4.565	4.846	5.198
19.59	3.84	4.835		19.59	4.537	4.733	5.183
19.6	3.76	4.838		19.6	4.518	4.713	5.077
19.61	3.78	4.781		19.61	4.528	4.659	5.03
19.62	3.88	4.847		19.62	4.553	4.78	5.156
19.63	3.86	4.808		19.63	4.522	4.724	5.113
19.64	3.9	4.791		19.64	4.475	4.778	5.2
19.65	3.83	4.802		19.65	4.428	4.617	5.063
19.66	3.83	4.75		19.66	4.504	4.737	5.092
19.67	3.88	4.748		19.67	4.477	4.763	5.187
19.68	3.88	4.822		19.68	4.574	4.735	5.109
19.69	3.79	4.869		19.69	4.539	4.707	5.136
19.7	3.85	4.795		19.7	4.593	4.819	5.132
19.71	3.93	4.801		19.71	4.555	4.819	5.195
19.72	3.83	4.815		19.72	4.5	4.84	5.198
19.73	3.93	4.784		19.73	4.468	4.704	5.117
19.74	3.92	4.851		19.74	4.531	4.836	5.225
19.75	3.79	4.826		19.75	4.547	4.802	5.185
19.76	3.83	4.806		19.76	4.505	4.771	5.217
19.77	3.85	4.814		19.77	4.554	4.863	5.162
19.78	3.75	4.881		19.78	4.515	4.774	5.176
19.79	3.89	4.824		19.79	4.492	4.698	5.078
19.8	3.83	4.878		19.8	4.467	4.733	5.124
19.81	3.8	4.846		19.81	4.528	4.807	5.146
19.82	3.85	4.767		19.82	4.565	4.768	5.11
19.83	3.86	4.87		19.83	4.554	4.79	5.151
19.84	3.78	4.87		19.84	4.53	4.76	5.184
19.85	3.88	4.848		19.85	4.517	4.814	5.121
19.86	3.91	4.826		19.86	4.453	4.79	5.146
19.87	3.89	4.821		19.87	4.485	4.654	5.119
19.88	3.89	4.937		19.88	4.488	4.722	5.109
19.89	3.89	4.839		19.89	4.593	4.733	5.196
19.9	3.91	4.861		19.9	4.419	4.716	5.152
19.91	3.83	4.856		19.91	4.506	4.756	5.152
19.92	3.86	4.78		19.92	4.445	4.77	5.129
19.93	3.82	4.876		19.93	4.556	4.67	5.142
19.94	3.8	4.84		19.94	4.513	4.7	5.078
19.95	3.81	4.831		19.95	4.499	4.676	5.146
19.96	3.88	4.801		19.96	4.438	4.809	5.144
19.97	3.85	4.842		19.97	4.482	4.914	5.132
19.98	3.96	4.784		19.98	4.517	4.958	5.206
[truncated: 8,002 more rows]

## Sheet: Fig4B
	Prn production
				Mean	Standard Deviation
G1_BtADRX	25	27.3	24.52	25.6067	1.48598
G2_BtADRX	0.025	0.02725	0.0223	0.02485	0.00248
G3_BtADRX	0.1589	0.2269	0.179	0.18827	0.03493
G4_BtADRX	0	0	0	0	0
G5_BtADRX	0.613	0.68088	0.64	0.64463	0.03418
G6_BtADRX	0.099	0.104	0.126	0.10967	0.01436
G7_BtADRX	0	0	0	0	0
G8_BtADRX	0.72	0.78	0.65	0.71667	0.06506
G1_HsADRX	16	19.8	17.5	17.7667	1.91398
G2_HsADRX	0.153	0.164	0.235	0.184	0.04451
G3_HsADRX	27.58	30.13	19.53	25.7467	5.53271
G4_HsADRX	0	0	0	0	0
G5_HsADRX	0.18	0.193	0.185	0.186	0.00656
G6_HsADRX	0.025	0.028	0.038	0.03033	0.00681
G7_HsADRX	0	0	0	0	0
G8_HsADRX	0.89	0.94	1.02	0.95	0.06557
G9_ATR	80	85.6	75	80.2	5.30283
G10_ATR	93.5	99.5	87	93.3333	6.25167

## Sheet: Fig5B
	Prn production					20α,22(R)-Dihydroxycholesterol production
				Mean	Standard Deviation				Mean	Standard Deviation
WT	161	167	158	162	4.58258	5.78174	6.58174	4.88	5.74783	0.85138
Y105A	0	0	0	0	0	115.517	117.017	111.58	114.705	2.80797
Y107A	13.58	14.58	12.56	13.5733	1.01002	1.42963	3.42963	2.1	2.31975	1.01795
F109A	20	27.52	18.72	22.08	4.75445	1	1.5	1.1	1.2	0.26458
V118A	197.522	201.052	196.53	198.368	2.37666	3.29135	3.89135	3.65	3.6109	0.3019
L207A	20.1357	26.3857	22.5	23.0072	3.15571	3.26598	10.266	5	6.17732	3.64549
V277A	143.237	152.117	148.37	147.908	4.45801	7.32932	12.3293	3.88	7.84621	4.24831
L278A	85.858	87.108	81.69	84.8854	2.83696	1.03956	5.03956	3.9	3.32637	2.06077
F280A	97.3601	102.66	90.11	96.7101	6.30025	3.96006	4.96006	2.8	3.90671	1.08102
T285A	27.5387	29.3387	20.85	25.9091	4.47281	1.28109	1.5	1.3	1.36036	0.1213
V350A	30.6763	35.7763	39.53	35.3276	4.44386	4.98564	7.98564	5.6	6.19043	1.58476
P351A	31.2815	36.9815	28.77	32.3443	4.20766	1.5579	4.5579	2.77	2.96193	1.50918
G352A	17.1545	20.7045	21.83	19.8963	2.44028	1.16329	3.16329	0.98	1.76886	1.21108

## Sheet: Fig5C
	Prn production
				Mean	Standard Deviation
V118A	197	207	191	198.333	8.0829
V118A-A281R	20	25	22	22.3333	2.51661
V118A-A281D	210	217	203	210	7
V118A-A281E	83	89	79	83.6667	5.03322
V118A-A281H	166	173	157	165.333	8.02081
V118A-A281K	30	33	31	31.3333	1.52753
V118A-A281D-T285E	243	255	238	245.333	8.73689
V118A-A281D-T285D	227	237	208	224	14.7309

[truncated: 4 more sheets: Fig6B, Fig6C, Fig6E, Fig6D and 6F]
